# Supplementary material for: A Combination of a Genome-Wide Association Study and a Transcriptome Analysis Reveals circRNAs as New Regulators Involved in the Response to Salt Stress in Maize
Source: Int J Mol Sci. 2022 Aug 28;23(17):9755. doi: 10.3390/ijms23179755 (PMC9456493; doi:10.3390/ijms23179755)
Supplement: Supplementary file 1 [file ijms-23-09755-s001.zip]

Archive with 13 entries (13 files):
- Figure S1.pdf
- Figure S2.pdf
- Figure S3.pdf
- Figure S4.pdf
- Figure S5.pdf
- Figure S6.pdf
- Table S1-Detailed information of each sample used in the transcriptome analysis.xlsx
- Table S2-Detailed information of identified circRNAs.xlsx
- Table S3-Detailed information of DECs.xlsx
- Table S4-Detailed information of DEGs.xlsx
- Table S5-Detailed information of 86 initial candidate genes.xlsx
- Table S6-GO term enrichment analysis of 86 candidate genes in GWAS.xlsx
- Table S7-Primers for PCR and qRT-PCR used in this study.xlsx
