# Supplementary material for: A Combination of a Genome-Wide Association Study and a Transcriptome Analysis Reveals circRNAs as New Regulators Involved in the Response to Salt Stress in Maize
Source: Int J Mol Sci. 2022 Aug 28;23(17):9755. doi: 10.3390/ijms23179755 (PMC9456493; doi:10.3390/ijms23179755)
Supplement: Supplementary file 1 [file ijms-23-09755-s001.zip › Table S1-Detailed information of each sample used in the transcriptome analysis.xlsx]

## Sheet: Sheet1
Table S1. Detailed information of each sample.
Line	Treatment	Time Point	Repetition	Sample ID	Data Size	Total Data
BML1234 (salt-sensitive line)	Normal	0 h	1	CK_BML1234_00h1	18.83 G	529.5 G
	Normal	0 h	2	CK_BML1234_00h2	19.14 G
	Normal	6 h	1	CK_BML1234_06h1	17.25 G
	Normal	6 h	2	CK_BML1234_06h2	17.50 G
	Normal	18 h	1	CK_BML1234_18h1	19.74 G
	Normal	18 h	2	CK_BML1234_18h2	19.24 G
	Normal	36 h	1	CK_BML1234_36h1	19.15 G
	Normal	36 h	2	CK_BML1234_36h2	18.88 G
	150 mM NaCl	6 h	1	T_BML1234_06h1	18.65 G
	150 mM NaCl	6 h	2	T_BML1234_06h2	19.94 G
	150 mM NaCl	18 h	1	T_BML1234_18h1	19.87 G
	150 mM NaCl	18 h	2	T_BML1234_18h2	18.65 G
	150 mM NaCl	36 h	1	T_BML1234_36h1	19.25 G
	150 mM NaCl	36 h	2	T_BML1234_36h2	18.06 G
L2010-3 (salt-tolerant line)	Normal	0 h	1	CK_L2010-3_00h1	19.88 G
	Normal	0 h	2	CK_L2010-3_00h2	20.98 G
	Normal	6 h	1	CK_L2010-3_06h1	19.39 G
	Normal	6 h	2	CK_L2010-3_06h2	19.30 G
	Normal	18 h	1	CK_L2010-3_18h1	17.67 G
	Normal	18 h	2	CK_L2010-3_18h2	18.29 G
	Normal	36 h	1	CK_L2010-3_36h1	19.08 G
	Normal	36 h	2	CK_L2010-3_36h2	19.53 G
	150 mM NaCl	6 h	1	T_L2010-3_06h1	18.37 G
	150 mM NaCl	6 h	2	T_L2010-3_06h2	18.51 G
	150 mM NaCl	18 h	1	T_L2010-3_18h1	18.02 G
	150 mM NaCl	18 h	2	T_L2010-3_18h2	18.76 G
	150 mM NaCl	36 h	1	T_L2010-3_36h1	18.39 G
	150 mM NaCl	36 h	2	T_L2010-3_36h2	19.20 G
