# Supplementary material for: A Combination of a Genome-Wide Association Study and a Transcriptome Analysis Reveals circRNAs as New Regulators Involved in the Response to Salt Stress in Maize
Source: Int J Mol Sci. 2022 Aug 28;23(17):9755. doi: 10.3390/ijms23179755 (PMC9456493; doi:10.3390/ijms23179755)
Supplement: Supplementary file 1 [file ijms-23-09755-s001.zip › Table S2-Detailed information of identified circRNAs.xlsx]

## Sheet: Sheet1
Table S2. Information of identified circRNAs.
CircRNA_ID	Chromosome	BSJ_Start	BSJ_End	Strand	Host_Gene	CircExon_Regions	CircExon_Numbers	Type	Length	Splice_Signal	Full_Length_Sequence
circ_000001	chr1	217133809	217134718	-	Zm00001eb041240	217133809-217133875,217134259-217134464,217134554-217134718,	3	exon	438	CA-AG	CTTTAGTTGTCTTTAAAGCCAAGCCTGCAATAGCCCATGACACATTCTTCAACTTTACTTTTCTAGCCTTTGGAGTTGTGGCATCATCATCATCATCACTATCCCCATCTTCGAAGGATTCACCTCTAGTAAGTGCATCATAAAATTCATCACCAAGTTCAGAATCTTCATGTTCACTCTGGATGATCAAAGTTTCAGATGCTTTTGACTTCACTACTGTTGAAGGCAGCTCAGATGTCAAGGCTGGATTGGCTGCGAAGTACTCTCTTATACCTGCTACTTGGCTGAGCAAAGCAAAAGGGATGCTTTTGTCAAAATTTGAGTGCCTTCTCTTCCATCTGCCCCAAAAACTTGGAGCAATCTCCAACATAAGAGTAACAACACATTTTGGACTCGATG…
circ_000002	chr1	80895762	80896583	+	Zm00001eb021300	80895762-80895837,80895917-80896048,80896476-80896583,	3	exon	316	AC-CG	CGTGGCAAAGTTCATTGTAAATGGGACTGTCAAAACAGCTACTCCTCTAGAAAAGTACTTCATTTTACCAGCCATAGGATTTCCCTCCATTCCTTCTTGCAAGTTAAGCTCCACTGTGGCCAAGAAGGTCAGTCCTGTTAACATAGGCAAGATGTAAAGAGAATCTGGAGTCGTCAGGTCAGTAAACCACAATGTTCCACCTCCTTTGAATGAAGGTACTTTCTCAACCATGTTTGATATGGCAAAGAAAAAGCTCATGAATATTGGCCCTTGGATCAGGAGTCCTTTCATTGGAGTAAGTGGACTAACACCATGT
circ_000003	chr1	239266530	239266843	-	Zm00001eb046260	239266530-239266622,239266739-239266843,	2	exon	198	AA-AG	CTCATCCTCGGACTCAGAATCACTATCAGAATCAGAACTGCTACTGGACTCTTCCTTTTTCTTGGCTACTACTTGAGCTTTAGCAGGAATATCATCTTCTGATTCATCCTCATCAGAATCACTGTCAGAGCTATCAGATTCTTGGGTCTTCTTTTGCACAGAGGCAACAACAGGCTTCTTTAGGCTAGCAGCAGGTTT
circ_000004	chr1	126558395	126558825	-	Zm00001eb026880	126558395-126558683,126558759-126558825,	2	exon	356	TC-AG	CTAAACCTTTCCACTTTGACTTGAACTTATCCACCAGCTGTAGTAGTGTAGCTCTTTGATCATTAAGTTGCATATCGTGAAGAAGTGAAACTATAATTTTTGTATGGTCTAAACAGGAAGTAGAAAAAATTACTGTGAGAATATCATGAAATAAAAAACATTTTCCCCCTGAAATAAAGTGAATAAATGTTGGTCATTTGTTGTAATTTTTAAACTGACGCAAAATAAATCATACAGGTGACATCAATATCCTTCTGCTCAATAGTGGAAGCACAATTGTCGCACATTCCGTTGCAGTCCTGAGGGACCTCTCCAAAATGGCGAAAGAATGCACCATGACGACAACTCCTCTTAGA
circ_000005	chr1	60583444	60585038	+	Zm00001eb017000	60583444-60583701,60585033-60585038,	2	exon	264	AT-AG	CTCCTTAGTGAGCATTTTAGCTGGATCAAAATTACTCATCGGTGGAGAAGACCCAAATATCCTATAGGGTAGCTGCAGCATCGGCTCAAGGATAGGCAAATCAGTATTGAGTTCTTGTATCAAAGGATGAAGAGCAACTGGTTGTCTAGGACCATTGAACTCGGAAGTACGAGCAAATCCCAGGAACAGTTTCATGACCCAAGGATCATACATCTCATCAGTGAACTTATAGGCAAAATTTCGATCAGCACATGAAACATTTAT
circ_000006	chr1	245161787	245176167	+	Zm00001eb047740	245161787-245161990,245176162-245176167,	2	exon	210	GC-TG	CAGGGAAGTTTCCTCTATAGGCACTGACTGATCAATGCGATGTTGGTAGTATATATCAATGTAGTCAGTAGCAAGGCGCTGAAGGCTTGCTTCACAACAAGCTCGAACATAATCTGGAGTGCCCTTCACACGCATGCCACTTGCATCAAATCCTGCAATGCCACATTTGGTGGCAATTTGCACCTTCTCACGAGGAAAATGTTTCAATGC
circ_000007	chr1	5365465	5365588	-	Zm00001eb001810	5365465-5365588,	1	exon	124	GT-AG	CTCCCCGCCCCCCACCGCCATGGCTCCCCCACCAACCTCGCGCTGCCTCGCCCTCGCTCTCATCCTCATCGGCGCCCTCTGCGCCGCCGCCGCCGCCGCGCGGTTCGCCCCGGCGGACAACCAC
circ_000008	chr1	117716365	117730792	+	Zm00001eb026200,Zm00001eb026210	117716365-117716462,117730615-117730792,	2	exon	276	GA-AG	CTTTGCAGTAGGAGAGCAATATCTGCAGCCTCTTGTTTTTTTGTTTGCTTCTGTAGTCCATATATTTGGCAAGAAACAACATAAGTAAATTTTATATCTGCTTGGGCCCGTGCATCAGGAGATAACTCATAGCCTTGAGTGTCAATATATTCTGCTGCAGAATTTCCATCTTCAATACCTGTTGCTGATATAGTCCTCTTCACGCAAGCTCTTGATAATTTCATTCCAAAATGGGGAAAATATTGAGGCATACGTCTTAGTTGTAATTTCTGATTC
circ_000009	chr1	81006165	81007064	-	Zm00001eb021320	81006165-81006256,81006592-81006653,81006921-81007064,	3	exon	298	GT-AG	CTTCAGCAGTAACAGAACAAGACCTTTCTAGACAAACTGAACATAGATCATTATCATCAATCGAGGGTGTGGTATGCTGCAACCCAAATTCTCCAACAATCCAAGCTGAGCCAAGACCATATTTCAGTCGTTGCCTTAGTAAAAGTAACAATCTCTGGCTATATTAAGTATACTCATGAGTGGCAAGGCAAGATAACTGGACAGTTGAAATACAGGGACATTCGAGTGTGAATTTGGAGAAAGTAATGGCTCCAAAGAGCGCCGTCCAAATATTCTAGCAACATCAACGGGAAGCCAC
circ_000010	chr1	2925482	2925737	-	Zm00001eb000770	2925482-2925737,	1	exon	256	AG-GG	CCGGACCCCACCAACCCGACGCCGCTCACCACCACAGTCGTCACCGTCCTCCGCGTCCGGCGCCTCGGCCCGCACCAGATCCGCCGCCCCGTGGCGCTCCCCTCCGTCGAGTCGGAGGTCGCCGCCTCGTCCGCCCAGGACCGCGCCAAGGACATCCTCGTCGTCGTCTCCGGCCTCCTCTTCGGCTTCGGCTGCGGCGCCCTCACCGCGGCGTCCATGTACCTCGTGTGGTCGCTCCTCGCCTCCACCTGCGCCT
circ_000011	chr1	143025742	143025840	-	Zm00001eb027820	143025742-143025840,	1	exon	99	GC-TA	TACCACTCCCTCCTGGCGCTCAACCTCGTAGGCAACCCGGTGCAGGCCAACATCGGCGACGACGCCCTGCGCCGGGCGGTCACGGGCCTCCTCCCGAGC
circ_000012	chr1	6078815	6089226	-	Zm00001eb002100	6078815-6078901,6079080-6079129,6089221-6089226,	3	exon	143	CT-AG	CTCTCCGAGCCGTTGGAAAGCACCGTAAATTCCACCAAGTAGAGTGGAGAAGATTGTATACCAAATTTGTGTATCCATGAAATATACCAGAATGATTGGAGCCCAAATTGCAATAACAACACCGATATTGCTCTTTTGTGTAG
circ_000013	chr1	245161787	245162988	+	Zm00001eb047740	245161787-245161990,245162983-245162988,	2	exon	210	GC-TG	CAATAGAGTTTCCTCTATAGGCACTGACTGATCAATGCGATGTTGGTAGTATATATCAATGTAGTCAGTAGCAAGGCGCTGAAGGCTTGCTTCACAACAAGCTCGAACATAATCTGGAGTGCCCTTCACACGCATGCCACTTGCATCAAATCCTGCAATGCCACATTTGGTGGCAATTTGCACCTTCTCACGAGGAAAATGTTTCAATGC
circ_000014	chr1	239266290	239266622	-	Zm00001eb046260	239266290-239266391,239266530-239266622,	2	exon	195	GA-AT	ATCTGATTCATCCTCATCAGAATCACTGTCAGAGCTGTCAGATTCTTGGGTCTTCTTTTGCACAGAGGGAACCGGAGGCTTCTTTAGGTTAGCAGCAGGTTTCTCATCCTCGGACTCAGAATCACTATCAGAATCAGAACTGCTACTGGACTCTTCCTTTTTCTTGGCTACTACTTGAGCTTTAGCAGGAATATC
circ_000015	chr1	232633457	232634075	-	Zm00001eb044560	232633457-232634075,	1	exon	619	GG-AG	CTATCTGCTATTGCACGTTCCCATGCTGCTGAGCTGATCTTTGTTTGTGTGCTAAGAATTGCAGGAGGAAGCACACGTATTATCTTCAATATGGTTCGATCTTTGAGCGTGTCATGCCAAACTGATGCTAAGCAGCAACTGCTTGATGAAAAGGCTGGTGGAGCAATAGCAGAGCCAACATTGACATGGTAGCTGTCAACCTGATCAAAATTTGGACCTGAGAAAATGTGCACTCCTCCACGGAGGAAAGCAACAGCAACTTCACCACCATGAGCAGAATAAACTATTTGAGCTAGTTGTCGAACATCATTTGGAAGATCGTAAGGGTCAAAGCTGAGTCTGTTCGCCCTGTCAACACTGCACTCAGAGGAGCTCCGTTCATCTGATGTCGTTGGCATC…
circ_000016	chr1	210140277	210140442	-	Zm00001eb039660	210140277-210140442,	1	intron	166	GA-AG	CTCACCACCAGCCGCCACCCCACCTCCACCTACGCCGCCAACATCTTCGTTGACGTCCGTCGCGCCGTGTGCCGCCAACGACCTCAAGACCATGGTCGAGATCCTCATCAACACTCTCAAGACGTTGTAGGCCACGGTTGAGGCCAATGCCAAGGCCATCGCCTTC
circ_000017	chr1	237203281	237204057	-	Zm00001eb045810	237203281-237203286,237203581-237203669,237203744-237203825,237203934-237204057,	4	exon	301	AC-CT	AGCAAACTGAAAATGCTTGATAGTCGGTCTATATGTACAGTTAAATGCCGAGCAGGGACTTGTTGAAGAACTTGATCACCTTGCTGGATTAATTCTTGCAAGGGATTGATTACTGGCTGGCAGATTAGCTCCAGGGCTCTACTAGCAGATTCTGGTGGAAGCGTTGTAATAACCGCACTTAGGGCTTCAACCAAATGCAACGAGTCCTCTGAAGAAACTTTATAACCACCAACTCCACTGATTGCAATATGGTATATCTGGAAGAGGCCATCCAGGGACCCTGAGAACTTTCTCCTACAGT
circ_000018	chr1	216346529	216346881	+	Zm00001eb041120	216346529-216346881,	1	exon	353	AA-AG	CTGGCTGGGACGGGGTACTCGGGGAAGAGCTTGGCGAGGATGCGGACGACGTCCTCGCGGTGGAGGACGCGCTCGGCGCAGAGGTGGCGGCCGGACGCGCGGGGGCTCTCGAAGACGCGGAGGTGCGCGTCGGCCACGTCGCGCACGTCCACGTACGCCTGCACGGCGTTGGCGAAGGTGCGGGCCGAGCCGTCCAGGTACTTGAGGATGTGCGCGATGCTGGCGTTCACCGTCGCCTGCAGCAGGGGGCCCACCACCAGCACGGGGTTCACCACCACCAGGTCCACGCCCCGCCGCCGGGCCGTCTCCCACGCCGCCTGCTCCGCCACCGCCTTGCCGTAGCAGTACCAGTT
circ_000019	chr1	252534395	252535216	-	n/a	252534395-252534511,252535157-252535216,	2	intergenic	177	GT-AG	CTGAAAGGGCAACAAATGTTCAAGGTGGACAAACCTCCACAACAACCTCAAAGAAGCTTCAGTTGAACCATAAGCAAGCATATAGTTCATCCCCATGAGTATCCTTCACTGTAAAGACTGTTCATGGAGAATATGGAATGATTGCTTCATAGGTAAATTAATGTCTAAGGCAATAAC
circ_000020	chr1	34596829	34597108	-	Zm00001eb010810	34596829-34597108,	1	exon	280	CT-AG	CTCCTCCCCCTCGACGCCGACCTCCTCTTCCGCACAGCCTGGTCCGTTGCGCAGCCTGTCGCTCGCGGACTCGGAGCTGCTCCTCGCCCCTGTGATCTCGGCACTCGGCTCGGGCAGCGCCAAGCTCGCCGAGGCCGCGCTGGAGCTCCTTCACAGGCTGATCGCACACTCCTACATCCATGGCGAGGCCGACCCATCTGCTGATCCCTCAGCACAGCTCGTCGCCTCACTCCTGGACGCCGCCTGCAATGCGCTTGGCCTTGATGACGAGCACATTGAG
circ_000021	chr1	6078815	6079279	-	Zm00001eb002100	6078815-6078901,6079080-6079129,6079198-6079279,	3	exon	219	AT-AG	CTCTCCGAGCCGTTGGAAAGCACCGTAAATTCCACCAAGTAGAGTGGAGAAGATTGTATACCAAATTTGTGTATCCATGAAATATACCAGAATGATTGGAGCCCAAATTGCAATAACAACACCGATATTGCTCTTTTCTCTTGGGAAAAATTCATGCCACCGAAACGTATGTATGGGGGTCTTCATGATAACCTTGGTGGGTTCAACAAGAGGTTTGAT
circ_000022	chr1	283014918	283015338	-	Zm00001eb057260	283014918-283015124,283015249-283015338,	2	exon	297	AA-AG	CTTGTTGGTTAATTTATCTAGTTGGCCATTTGTTACAGCTGCTGAGGAAGTTGAAGTCAATCGTGTTTGATCAGCAGCCCTTGAGCCACGCCCTCGGCCTGTACCAGCACGACCCCTTCCACGGCCTTGTTTTTTCCTACTTGAATTGTCCAAGGAAGGTTTTGTATCTGTGACGCCTAAAATCTTTGCTGCCTCATTTACCGAACCCTCAAAATTTCCAAGAGCAAGCATGTTGTCACCATCTGGAGATCTCGGACGCTTCAGGGTATTCTTTTGTATCAAGAACTCCTCACAGTT
circ_000023	chr1	180157516	180157720	-	Zm00001eb032230	180157516-180157720,	1	exon-intron	205	GT-AG	CTTGTAGCCAACCCATCCTGTTTGGAAGCCGATGTAGCTACCGGCTATGATAACAAATAACATCACAAAGCAATTTAAGACCGTCACAACTCCTTGCACAAATGAACTCTGAAAAAAGGAGAAAAAAACAAGAGAGGAAAAGTCAGGTGCCACATTCTCAGGAAATCTGTATGGTAGGTATTATTGAATTGGAGAAGGTAGCAAC
circ_000024	chr1	61259188	61259820	+	Zm00001eb017140	61259188-61259380,61259815-61259820,	2	exon	199	AT-TG	CAGGTACTTGTCTGGTGCTGGTTTGGGCGCGGGCTTGGGGTCGGACGACGAGGTGGTGAAGAGCCGCCTGATGCGCTCGATCCAGCTCCTCCTCCTCTTCTCCTTGTCCATGTCGCCGACGGCCGAGCGAGCGAGAGCGGTAGCGGCTGCACTACTCTCTCTCTCTCTCTCTATCTAGGCTCCACTGCGCGGCGGGTAT
circ_000025	chr1	288546329	288547408	-	Zm00001eb058920	288546329-288546334,288547332-288547408,	2	intron	83	TT-CT	AGCAGTCAGGTTTCCTGTTAAGATCAGAAGGCTCGGGGGCGGACCCAGTGTAGGACATGGGTGTACACATGTACACCCAATAA
circ_000026	chr1	147867437	147867795	-	Zm00001eb028220	147867437-147867656,147867737-147867795,	2	exon	279	AC-AT	ATGTGGCTCCTGTCTAGTAATCTTATTCTTCATACTAAACCATTCCTGCGAAATGAACGATGTGGGATTGTTAGGCAATGGCATCTACAGTTGGGTCATTTTTCTCAAGAGACAAATAATATTGATCATAAAAAGGTAAACATGGAAACAAACAATAAGATAAACCTGTTGCTCCTGTAGTTTGACAGTCAAGGTTTCTGTTCTCTTTGTGTAGAACAATCTTTTCTCACAGAGTTTCACAAATGTACTTGCAGTTTCCTGACGGAGGAGCTCCAAGGT
circ_000027	chr2	162145206	162145474	-	Zm00001eb094880	162145206-162145474,	1	exon	269	GT-AG	CTTAGGATCAATCATAAATTTGATTGCATCAATCAGCGAATGCAATTGTAATTGCTCCACGGGTATAGGTGGTGCACCCAATCCTCTGGCATGAACCATGCTGCCCCAAAAGAATTGATCACCAAAGAATGGTATGATGGTAGTGGGGCACTACAAAATTTAGGGGTAAACATGTCAGTCGGAAAACACACACACACAAATAGGGGGAGAGGAGGGAATACCCCAGCCTTAAGACCAGCAGCAGTAGTGCCAGCACCACCATGGTGTAC
circ_000028	chr2	218274047	218274393	+	Zm00001eb109300	218274047-218274052,218274269-218274393,	2	exon	131	AA-AG	CTTCGGGATTGGCTAATTTGTGTGCCCCTGTAGGTGCGACAATTATTGGCGATGGCATATTATATCCTAATAAGCTTGTTGACATGTCTATCTTGCTCACATCTATAAGGACTCGTGGCCGTAACTCCATT
circ_000029	chr2	242705748	242709944	-	Zm00001eb118220	242705748-242705847,242705981-242706067,242709727-242709783,242709874-242709944,	4	exon	315	CT-AG	CTTTTTCAACTTGTCAATATCTGTAAGAAAAATTGCACGGTCCTCTGCATTATTGACATACTTCAAGTCAAGCATTATAGTCTTCGCAGTTTCCAAGACTCTTTGGTAATATGGATAGTAGCGAATAACTTTTGCTTGACCAAGAAGCATTGGGGTATGAGAACCAAATCCAGAATTGAACTCTTCACTATGTCGACCCATTCCATGGTAGAGAATTCCACGCAGATGGTAAGCTTTTGCGAACCTTGAATCAATTTGAATAGCTTTCTCAAGGCAATTCAACAACTTCTCTGGATATGCCAAATCAAGATAAAG
circ_000030	chr2	11923852	11928342	-	Zm00001eb071490	11923852-11923857,11927392-11927516,11927594-11927669,11928187-11928342,	4	exon	363	AT-CT	AGAAAACTATAATAATAACATCCAGATCGGCACCCGCGTGTATATAATCAGGCTTTAGTTTAAGCCACTTTCCATTTCGATCACCAGGTTCCCATTTGGAATCAAGGTCCTTCAGTACAATGCCCTCATCTCTGTTCTCGATAGTCTCTTTGAAGAATTTATCAACGTCTTCAGCATTATGTGCAATAATCGACCAGCATGGTTCATCTGAAGGGCGAGGGACATTTAAACCACGTCTTGGGATCAAAATCTCAAGATGACCCTTTAACTGTTTCACAACCTTCTGCAGAATTTGATGCCGCTCCGTCAAACTTTGGTGGATAACACTGGTGTCTCCAGCATAAAGGATGTCAAAAACAACAT
circ_000031	chr2	2711416	2711510	+	Zm00001eb066730	2711416-2711510,	1	intron	95	GT-AG	CTGATGGAGGCCGAGCACCAAGGGGAGGTGAGGGAGGAGCTGGGACGACGACCTCCATGGCCGGCGAGGATAGGAGCTCGGTGGAGGTCGGCGAC
circ_000032	chr2	4866262	4866892	+	Zm00001eb067960	4866262-4866493,4866575-4866658,4866741-4866892,	3	exon	468	GT-AA	TTTGGAGATGATGAAATTGAGTAGTATCGTGGTTGCAGACGAGGAGCTATTGCTGCAAAAAACACTCCCAGTGGTGGCTTAGCTGAAGGGAATGCGGCCATAACTTCAAGAAGGCTCCTCTGACTAGCAGTTATCCATTGAGAATACTCATCCTTTCCAGAAGGAGAAGCCAAGAATCTAAGTCGCTCAGCTTCAGCTGGATCAGATGCGTGAGAAGCTAAAGCAAGCAAAGCAGCCTTCTTCGGTGGATTGAGTAGATCAGCATATCGTAGAAGCGCAGTCCGCAAGGTACATGGAGATGGGAAAGGTGGGGCCAAGGAACCTCCTCCTTTACGAGGAGATCCATCTTCTGCATCTGCATGGATGGAGAAGAATGTGTCTGGAGAAAGGTCAAGTAGC…
circ_000033	chr2	150354172	150354290	-	Zm00001eb093120	150354172-150354290,	1	exon	119	GA-AG	CTCCCCCTCCTCCGCGCCCTCTCCTCCTCCCCCTCCCCGGTCTCCTCGGACGCAGAGCTCCGCAAGTACGCGGGCTACGCGCTGCTTCTTCTCGGCTGCGGCGCCGCGACCTACTACTC
circ_000034	chr2	205203727	205203888	+	Zm00001eb104750	205203727-205203888,	1	exon	162	CT-CT	AGCCACTATTCCCAATTCAGAATGTGCCTACTCCTATGACATCAGCAGCTGCTAATGTACTTCAAACATCGTTTCCTATGGCCCCTCCAGGAGTACCTTCACCTGTTGCCCCTCATGTTTCCCAGCCTTTGTTTCCTGTTAACACTTCAGCTGTCAATGGAG
circ_000035	chr2	210637199	210641120	+	Zm00001eb106360	210637199-210637298,210637769-210637837,210641115-210641120,	3	exon	175	CG-CT	AGGTTCCTGACTAGTATCTTTACCAATCCAGTAATGGATATCATGGCGAAGAGAACCATTTTTCAAGGCTGTTGTCTTCAAGATAATGTAAGAATCACCCATGAAGAACTTTCCATACGAAGATGCAGGGGCAGGGATCGGCTTGAAATTCTCAATACGCCATATTTCCAAGCCG
circ_000036	chr2	240442064	240442167	-	Zm00001eb117310	240442064-240442167,	1	intron	104	GT-AG	CTATTGCACAGGTGGCCACACCATTTAATCAACAAAGTACATGCATATCTTGATAGAAAGGTTGCTAATCTAGAATTATGTATTCTCTTCCTGCTCTAGTTCAC
circ_000037	chr2	4866211	4866422	-	Zm00001eb067960	4866211-4866422,	1	exon-intron	212	GT-GG	CCCAATTTATAAAGACTACAGCATATCTGAAATTCTGAATGTTTGTTTCAGGTATGAAACCGGAGACCATGTTGGTGTATATGCAGAAAATTCTGTTCAGACTGTGGAGGAGGTTGAAAGGCTACTTGACCTTTCTCCAGACACATTCTTCTCCATCCATGCAGATGCAGAAGATGGATCTCCTCGTAAAGGAGGAGGTTCCTTGGCCCCAC
circ_000038	chr2	148461982	148462187	-	Zm00001eb092770	148461982-148462187,	1	exon	206	GC-AG	CTCCGCATCCCCGACGCGATCCACCACCACGGAGGCGGCGCCACCCTCCACCAGATCCTCGCCGAGGCCGCGCTCCACCCAAGCAAGCTTCGCGCCCTACGCCGCCTGATGCGCGTGCTCACCGTCTCGGGCGTCTTCACCGTCCAGTATTCTTCAACCGTCGACGCGTCGGACGGAGCTGATGTCGTCTACAGGCTGACGGCAGC
circ_000039	chr2	56697824	56698030	+	Zm00001eb083390	56697824-56698030,	1	exon	207	GT-AG	CTCCACCCCCAGCTCACTACGCGCCTCCGCCTCATTTCTCACCCCCTGCCCACAATTCACCACCACCCCATTTCTCGCCTCCCGCTCACCATGCGCCACCGCCACATTTTTCACCTCCCGCTCATCATTCTCCACCGCCTTATTCTCCACCCCATGGTCATTATTCTCCACCGCCCCCAACTCACTACCCACCACATATTCCACCAC
circ_000040	chr2	138958024	138958121	-	Zm00001eb091560	138958024-138958121,	1	exon	98	GG-AG	CTCCTCGACCCGCTCCTTCTCTCCTCCCTCCGCTCCGATCTCTCCTTTCCAGACCCCGACGTCGCCGCCTCCTCCATCGCCTCGTTCCCATCCCTGCC
circ_000041	chr2	108888088	108892728	-	Zm00001eb088370	108888088-108888249,108888373-108888452,108889017-108889098,108892391-108892479,108892572-108892728,	5	exon	570	GA-AG	CTTTGTAACAGCTTTAGCAAATTGACTCGGCTGCACGTCATTATCCTCTGGGCCATTCCAGCCTTCCACAATTTGGGGTAATTTTCTAAGATTTGCAAGCAACCTCTCTCTCATTATCTGGACAAGTTTGTTGTGAATTTCATCTCGATGGATCTTGTAGTCCTGAGCTACTCTATCCAGCTCAGACATTAACAGATGTTTGCGCGCTTCAGGTATTTTCAGGAAAAGTACTCGCCTGATATCTGGAATTAAAGAATGCATAAAACTAATGATTTGACTCGCCAAAGCTAAATGTTTGGACGTAATTGATTTAAGTCCAGACACCTGTACTATCCTGAAAATGGCAGATAAAAGTTGAACAAATCCTTCAGATGAAAGACTCCGCAACTTATTTGCTAA…
circ_000042	chr2	212786574	212786745	+	Zm00001eb107200	212786574-212786745,	1	exon	172	GT-TG	CACCACCACCTTCCTCGCCGTCTTGCTGGTCGTGGCCGCGTCCGCGGCGCCGGCACGGTCCTGCTCACCGCGCGACATCCACGCGCTGCTGAGCGTGAAGCAGGCGCTGGGCAACCCGGCGTCGCTGTCGACGTGGACGCCGGCGTCGCCCAACTGCTGCGCGTGGGACCAC
circ_000043	chr2	24418871	24419119	-	Zm00001eb075580	24418871-24419119,	1	exon	249	TC-AC	GTTGAAGATGAGGTTCTTGTTCTGTGCCTCGAGCGCGAGGCCGCCGCGGAAGTGGACGCACCACACCAGCACCAGCGCCGCCGCCACCGCGGCCAGCGCGTGCGCCGCGTACGTGAACGGCGTCGCCTTCACGCCCAGCCCGGCCGCGGCCATCTCGCTCCGATCCGATCCGATCCGCTTGTGCACTTGGTGTACGGTATAGCAGCTCGGGGCTCAGCTCACTAGCTCAGGCTGCTGGAGCGGTGGAGA
circ_000044	chr2	18105372	18105694	-	Zm00001eb073750	18105372-18105694,	1	exon-intron	323	GG-AG	CTTTCTTTTCCTCCCTTTCTAATCTCCCTTTCCTCTCTATCGTGCCTTTTATCATCCTTTTCCCCACTCCTCCATGGCTTTTTTCTCCTTATCTCTCCTAGTCTCCTTGGCTCACCACCCCCTGTGCATCAAAAGAGCAGTCATGTCGTCCCATGGTGATGTGTAGCAGAAGCAACAGCGGCAGCAGTAGTACTACTGAAACACACAACCCTACAAGAGCACAAGCAGCAAAGGTGTGTCTTGTGCTGTCTGTGGGGTGTTTTGTTTCTCTTTCTTCGTCTCTTCCTCCGCGGCCAGGCTCATCGCCTTTACCTTTACTCTCC
circ_000045	chr3	134500913	134504390	+	Zm00001eb137610	134500913-134500918,134504331-134504390,	2	exon	66	AA-AG	CTCAAATTTGGAAGCCCTGGTTTGTTCGATAGAAAGTTGATCTTGAACTAAGTGGAGTTCCTGATT
circ_000046	chr3	200204175	200205143	-	Zm00001eb152410	200204175-200204276,200204375-200204452,200204527-200204619,200205036-200205143,	4	exon	381	GT-AG	CTCTGGTCTTTTCCAATACTCCTTGAAAAGAGATGGACTTCTAATGCAGAGCTCGCCAACTCCAGTTGTAGTTTCAGCCCCGTCCTCCATAATGATCTTGGCCTCAATGCGTGGAAGAGGTTTACCAACTGTACCTTCTTTTCGGATACCATGCAATGGATTAGACAGTGCCATGACAAACTCAGTCATACCATAGCGTTCCAAAAGACGATGGCCTGTCACTTCCTCCCACCTCTTCATAAGTGGGGAAGGAAGAGCTGATGATCCACACATTCCAGTAAATACTGTAATGGCCTCTGTACTTTTACTCGCATCGTTGGGATATGATTCTCGCCATCTCTGCCATATCCCGCTTACACTGAATTTTGGTATAAACTCAAC
circ_000047	chr3	150659648	150659734	+	Zm00001eb140820	150659648-150659734,	1	intron	87	GT-TG	CACCTGAGCAGCGGACCTGCGCCGCTGCCACCGGCCACCCCACAGGAGAACTGCGCTGCCGCCCTCCTTTGACCAGCCATCCTCCAC
circ_000048	chr3	233850165	233962663	+	Zm00001eb162910,Zm00001eb162920	233850165-233850233,233850330-233850638,233962658-233962663,	3	intergenic-genetic	384	CC-AG	CTGAGGTGTATAGGTCAGGGGTTGCATAGGAGCACCCATGGTGAGCAAATGGCCCCCAGCATACGCAGCTTGTTGCTGTGGTTGCATAGGTGCTGATGACATTGGTCTAGCTGGCTGATATACCATGGGAACCCCTTGTGATACAGGTGGAACTTGATTTGAGTGAGGCATGTGCTGCCCAGGTTGTGGAAAATGTGGCATTTGCCCTGGCATGCCAACGTTAGCCCCCGGCATAGGCTCACCAACAGAACGGAACTGTTGTGCTGCTGGTGGCACGAACTGAGGAGGAGGCTGCGAAGGAATCACTGGCCTAAACTGCATAGGCATTGGTGGTCCAAGATTTTGTGGCTGAGCGCTAGAACCCATCATGGGAGGTCTGGGAGG
circ_000049	chr3	171487613	171487759	-	Zm00001eb144520	171487613-171487759,	1	exon	147	GT-TG	CACCTCCACAGGGCACGGAGTCTCCAGTACTACAACCCCGCAAGTATCTACCACCTCCATACTACTACTACAACTCTCCACCAGCACCACAACACCACCAGCACAGCTACGTACCTCCACCACCGCTAGCTTACCAGTACCCTCCAC
circ_000050	chr3	184026488	184027965	+	Zm00001eb147780	184026488-184026678,184027960-184027965,	2	intergenic-genetic	197	TT-TG	CAGGCCTTGTAGGCTGCATCCACCCGATCCTGTGCATCGATGTAGCTTGGGAAGTCATAGCCAACAAGGAAATAATCACCACGCCCAAATCCAGAATTCCCTTCAAGGGAATCCAAGAGAGGTTCATAGTCATAGCTGCCAAAAGCGCCACTCCTTATAAACTGCTTGGCTTCTTCAAAACGTGGGTCTGGTTTGAA
circ_000051	chr3	127903502	127903660	-	Zm00001eb136490	127903502-127903660,	1	exon	159	GC-AG	CTCCTCGATCTTGGGGCCAGGGCCGCCGCTGCCGGCAGGGGCGTCCTCGTCCATGCCGCCAGCGCCGCCCATGTCTTCACCCGCGCCCTGGTACATCTTGGCGATGATGGGGTTGCAGAGGCTCTCCAGCTCCTTCATCTTGTCCTCGAACTCGTCCGC
circ_000052	chr3	181598673	181598825	-	Zm00001eb147200	181598673-181598825,	1	intron	153	GG-AG	CTCACCTCCCACACACGGCAGATTCTCCCTCCCCTCCTTCATCACAGCCGCCAGCTCTCCTTCATCACAGCCGCCAGCTTCTCCCTCCTCTCTCCTTCTCCGCCAGCAGCTTGTCCCTCCCCGCCAGCAGCTTCTCCCTCCCTGCATCTCTCC
circ_000053	chr3	197547279	197552982	-	n/a	197547279-197547327,197547407-197547459,197547535-197547663,197552858-197552982,	4	intergenic	356	CT-AG	CTGAAAGCCTAAGGAGATGAGGTCTTTTTCTGATGCATCAGTAACCATCCTTAACATATGAAGAATGCTGGGCCAGCTATATGATAACTTTTCTCCATGTCTCTCAAGAACATGCAAAAGAATCTTTAATGCACCCATTTGTACATCAACGTTCTTGTTGGAGGAATAGAGGATCATCAATGGAGATAAAACTGCATACTCAAATGATACAGTTTCACTTTCTTTGACCAACTCGTCAAAATAAATGACAAAGAGTCAAGGATGGTTAACCATGTTGAATTGACCAAAGCCATACAAAGAAGGGCCAACTGTCCACTACATTCCATACTATTTGATTCACATTTAGGTGATTCAAG
circ_000054	chr3	195514341	195514525	-	Zm00001eb151300	195514341-195514525,	1	exon	185	GT-GA	TCCACGCTCCACGACATTCACCACCACCACGGCACCACCCTGTCCCTTCAGCTCCAACGTGCATGAGAGACGCCACTCGCGGTACCCACGCGGCGGCAGAGGCGCTGGCGGCCCGTCGTCCGCGCCGAGCAATGGCGTCCCCACTGCTCTGCGGCTGCGCCCTCCTCCTCTACCTACTTGGCCAC
circ_000055	chr3	193949241	193949504	-	Zm00001eb150880	193949241-193949504,	1	intron	264	TA-AG	CTGCAGTGATAATGTCTTTTGTTATAATTATATATTAATGCATGGAAAGCCAAGCCTGTGACAATCATGCACCATACAGTCTGACAATTGTTACATTTAAACATGATAGTCATTGTTTCTGTATGCCTGTCAGATATACATCGTGTCTGTATGCCTGTCAGATATACATGAAAATGTTTCTACACTACAGCTATGGTATTAACTGTCTATCTACCAAGAATCTTCACAGTTCACACCTCATTTGTACATGGTTTTTGTCCATTA
circ_000056	chr3	144687298	144689847	-	n/a	144687298-144687378,144687461-144687591,144689842-144689847,	3	intergenic	218	TG-AG	CTGAGATGCACACTGAGGCTCAGAATGCATATTAGTATGCCCCTGAATCTGGCTTGTTGAAACAACAGTCATGGGATATCCCTGGTAGAAGAAAGGTCTACCAACAGATTGGTTTGATGCAATATCTTCTGCAGCAAAATATTGATCTTGATTTGGTGGATCAACAAAAACCGGGTCAGCTGTCTGGGGCAAAACCGCTTGTTTAACATTTCCCATCA
circ_000057	chr3	136790629	136790705	+	Zm00001eb138100	136790629-136790705,	1	exon	77	TG-TG	CAATGGCGTTTAGTTGGAGTCTGGATGGAGCAGGGAAAGGAGGAGGAGGAGAGAGGAAGGAACGGACGAGCGATGCA
circ_000058	chr3	2924134	2925736	-	Zm00001eb119690	2924134-2924420,2925731-2925736,	2	exon-intron	293	CT-AG	CTCTGCAAGATTCTTCCCTGTGACAGTGCCAATGCAAGCAGCAAGGTACTGACATACAATGGCAGTGAAATTGAAAAGGAGAGCCAGCAACACCAGGTCGAATCCAAAACAAGAACCAGCTTCAACGGCTGCCACCCACTTCCCGAGATCAATGTAACCCATTGAAATCAGGAGTGCTGGTCCAAGGGCATGGAAAAACTTAGGCATACCACCCCTGGACTCCTTATATCCCATGCTCTGTTGAACATCCGGTGCATCCATGGTACGGCAAAAAAGAGAATGCCTTCAGGGAG
circ_000059	chr3	11606854	11606981	+	Zm00001eb122740	11606854-11606981,	1	exon	128	GA-AG	CTCCTTCCGTGAGGTTGTTGCGAGCGGAGCTGGAGGAGCGCTCGCTGCTGGAGGGGAGCGAGCTCGTGGTGCTCGTCTTCGCCTGCTGCTTCTCCTGCTCCTGCTCCTGCTCCTGCGCAGCCATCTTC
circ_000060	chr3	16630966	16631291	-	Zm00001eb124100	16630966-16631291,	1	exon	326	AG-AG	CTCCTCCTGACTTCACTACCCTCCCACTCCCAACCTCCGCCCTCCACACCCACCAACGATCGACCCACCTCGCGATCTCCGCCCCCCGCCTCCTCCGCCCCGACGATGATGCGGGGCGATGACGAGTACCGGTACCAGCAGCAGCACGGCCCCGGCGGCGGCGCGCCGCACGGCCTGATCATGGCGGTGGTGGTGGGGCTGGTGGTGGCGGGCCCGCTGTTCCTGGGCGACGGCGGCGAGGCGGTCACGTCCGCCGTGGCGGACCTGCTCGGCCCCACGGGCCTGCTCCTGCTCCCCGTCGGCCTCGTCCTCGTCATCCGCGTCCT
circ_000061	chr3	171487700	171487852	-	Zm00001eb144520	171487700-171487852,	1	exon	153	GT-TG	CACAACACCACCAGCACAGCTACGTACCTCCACCACCGCTAGCTTACCAGTACCCTCCACCTCCACTCATCCACAAGTCGCCGCTTCTTCCATCGTCGTCACCAGCGGCTCCATACCACTACAACTCTCCACCTACCTACCAGTATCCACCAC
circ_000062	chr3	76143727	76144015	-	Zm00001eb132130	76143727-76144015,	1	exon	289	GT-TG	CACCCCCGACCCCGACCCCGACCCCGACCCTGACCCTGAATCCGAATCCGAATCCGAAGATACCCTACGCTTCGCCTTCGCGTGTGGTGGCGCGGGCGCCGGTGGTCGCGTTTACTCCGCCATCGCGCTCGCCGACGAGCTTCACGCCTCGCTGCCGTCCTCTCGTTCCCTCATTATCGGTGCGCCCGCCCCGTCCTTAGAGTCCTCAGCTGCCGCCGCGGCCTCGTACCCGTTCGCCCCCGTCCCACTGCACTGCCTCCCGCGCGGGATCCTCGCCGCGGCGCTGCAC
circ_000063	chr3	170389378	170389650	+	Zm00001eb144240	170389378-170389383,170389525-170389650,	2	exon	132	GG-AG	CTTGCCAGCCCAGGCCTTGAGGGTGCTCGCCTGGAGGGCACGGCCGAAGGAGAAAGACAGGGACCACGGCTTCTTGGTGCTGAGCTTGTTCATGGCATTGAGGTTGCGGGTGGCCTCCTCCTCGCTGGTACC
circ_000064	chr3	30622888	30628397	-	Zm00001eb126710	30622888-30622934,30623017-30623115,30623230-30623370,30628392-30628397,	4	exon	293	TT-AG	CTCAACAAAAATAGTTCTGGTGGTAAATAAGGAGCCTTATTAACAAACTTTAAGAACTGATTCCTTGAAGAATGTGAGGCAGAAAGTGAAGCATGAAACTCCTGTACATCTTTCAAGCAATCAAGATCAGGAAGTGGTTCTAACTCTCTTATGTAATCATAAAGCAGAGGATCAATCTCCACTGTCAATTGATGGAGTAAAGAAAGAACTCTTGATGAATCTTCAGTACCACTTCTTTCTTCTTTCTCATTAATTAGGCAGGAAAAAATTAATTTTGGAACTACTACCAGGAA
circ_000065	chr3	216353209	216353544	+	Zm00001eb157450	216353209-216353544,	1	intron	336	GT-AG	CTGTCCAATCTCATCCCATAATTTTAAATACTGCTGCAGCCCAACCATAGAAAGATGACTCCCAATATCCCTAACCCAACGCCAGTTGTCCATAGCTTGAGCAACCGTCCGGGTCGAGCTGACTCTACTGTTCACCAAACAGACAACCTCTGGTGCAATATCAAAGATAGCCTTCCCATTCAACCATTTATCAAACCAAAAGAGAGTGCTTGTCCCATCTCCGACCACATGAAAGACCGAAAGATTAAAAAACTGTCTTACTTGCTGTTGAATAGGAAGATTCATTCCCTACCATGGTCTGGACGGATCAGTTTTTTGCAGCCATAACCATTTCAC
circ_000066	chr4	61143886	61144056	+	Zm00001eb176750	61143886-61144056,	1	exon	171	GT-AG	CTCCACCTGTGCCACCCCCACCTCCACCTATGCCTAGGCCTTTTCCTGTAAGGTCTCATGCACCACAACCGCTGACCCCCCAACCACCTGCTTTGAGTTCATCTCTTATACTGTCAGGGACACCTCAATCCCCACCTTCCCCACCGCCTTCTAGGTGCTCTCTCAGTAAAC
circ_000067	chr4	181531536	181532637	+	Zm00001eb193030	181531536-181531624,181531707-181531775,181531900-181532319,181532455-181532507,181532596-181532637,	5	exon	673	GT-CT	AGTTCATTGGCAGAGTACAGCTGAGCTTCATCTTTTGGCATGCTATAGAAGACGAAAAATAGTGTTACTATGTGAAACCTCTGAAAAAGTAAGGTCTGTAGTGGAGGAGTTTTGTCAAAGAGGTAACAAGCTGGAATTCGAAAATCAGTATCTCCTTTTGCTGGGTCATTCGACCAGGGTGAGCCAAATGTCTTGTATAGATTATCTGGCGAGTTCAAGTTCAAACCCAATGCTGTCAAATCTATTCCTAAAGCAAGAGATGCTAAATCAGCATCATTCATCCTTATAACACCCAAAAATCCTAACAAGCCATATGGATCAGGTGGTGTCGGTCCCGCCTGAATCTTTTGAATCTGATCCCGATATGAATGTGCAGCTGAAGACATCTGCTGCAATCTG…
circ_000068	chr4	180058889	180059149	+	Zm00001eb192680	180058889-180059149,	1	exon	261	GT-GA	TCCCACCCCGACCGACCGACCGCCGAACGAACCCGACACACCTCGTCGCGTCGCGGCGCTTCTCTTCTCTTCATGCGCTATCGCCGCCGTTTCCACCTCTGCGACGCCCACAGATAGGCAGGAGGAGGACGAGGAGGCGATGCCTTCGCTCTCCTGCCACAACCTCCTCGACCTCGCCGCTGCCGACGAGGTGCCCCTGCCGTCGCCGACGCCGCTCCGCCTCCCGCGCGTCATGTCCGTCGCGTCCCCGGCCTCGCCCAC
circ_000069	chr4	201655934	201656014	-	Zm00001eb198720	201655934-201656014,	1	exon	81	GT-AG	CTCCTTTGCCTCCTTCACCACCACCCGCTACACCGCCACCACCACCTCCACTCTCTCCAGCTTCACCACTTCCGCCACCAC
circ_000070	chr4	5899059	5899386	-	Zm00001eb166460	5899059-5899386,	1	exon	328	GT-CG	CGCATTGATCAGCTGCTGGGTAAAGCATCTGAGGCACATGCAGTTCCTAAACGCTGAAGAAGTTTGGTTTCCATGGTGGTCCGAATAATCAGGTTGCAGACATGAACAGAAAGCTCCCATAATCCAAGAGACCTCAGAAAGGCGTTCCTTGAACCAGAACTGTATAGTCAGCAAGCCTGACAAGATAGCAAATGCCCAAAGAATGTGAACTGATGCAGATGCTGTGCAATACAAGCAAGCACCCCCCTCTCCAAAATCCCAAATGGGTTCAATGCAGATGGAGGTCGAAGTCGAGATTGAAGCAACTGCTCCGTCTGATCGTCGATAC
circ_000071	chr4	180562358	180562570	+	Zm00001eb192800	180562358-180562570,	1	exon	213	GT-GG	CCCTGACCCCCATTTCGTTCCTTCCAGATCTCCCCGCCCCCGCATCTCGCCCGCCAGCTACCGGCGAGTGGGCGCGCGCCCGCCGCCGCCGCGATGTACCTGGCGTACGGGTGGCCGCAGTCGATCCCTCTGGACCCGGACGACTCGGACCGCGTGGTCCTCCTCCGCGTGCTCGGCCGCCTCCTCCTCGCCGTCTGTCCGGCTTCGCTTCAC
circ_000072	chr4	2789805	2789973	-	n/a	2789805-2789973,	1	intergenic	169	GA-AG	CTGGTGTTGCCCTACACTGTTGGTGATGAACAACTCGATTTCTGGAAGGAGAAAGCAAGGAGCAACATGAACAGGCCAAAGGTAACCAGGCAGCCGAAGCCGTTGCCGTAATCTGCTGTCATTTCCCCCGCGCATGCACATGAATTTTTGTATGACATTTTATTTGTTC
circ_000073	chr4	232038016	232038085	-	Zm00001eb204140,Zm00001eb204150	232038016-232038085,	1	exon	70	TA-CG	CGGTTCTAGAGCTGCCTCATTCGAGCGATCCGTCCACTCACAGTCACAGCCATGGCTGCTTGCCTTTTTA
circ_000074	chr4	225882910	225883783	+	Zm00001eb203060	225882910-225883137,225883778-225883783,	2	intergenic-genetic	234	AT-AG	CTTATGCCTCCAAACCAATGTTCTAGCATCGCCAGCTAGATCAGCAGGATACCAAGGCGCCAAGCTACCACTTTCATGGTTATTTGAATATTCATTATTGTTTCCCTTCATATGGAGAAGCACACCAAGCAGTTCAACTATCTTGCAGTACCTTTTTGGTGAAAAGTGAATGTCCAGATTGGGTACTTGAAAAGCAACACGAGTTGATGGATAATTCGGATGTGGAACTTTGAT
circ_000075	chr4	237051443	237051604	-	Zm00001eb204890	237051443-237051604,	1	exon	162	GT-AG	CTCCTCCTCGCCGCCCTGCGCCACTTCGAGGTCGGCCAGCCGCCAGACCCCTCGATGCTCCGATCCCTCCTCCTCCAAATCGGAATCTCCGACGCCGCTTCTTGCCGCTCCGAAATCGAGTACCTGGAGGAGCAAATCCTGAGCCAAGAGGAGGACGCCGAC
circ_000076	chr4	160340958	160341231	+	Zm00001eb187120	160340958-160341231,	1	exon	274	GC-AG	CTTTCTTTCTATCTTATCCATCCCCTCCTTTCCGAGCTCTCTCTTCCCTTTTATCCCTCCTTTTTCTCATATGGAGGAGAGTAGTAGCTTTACTCTCTCCACGCCTTGCATCAAAAGAGCGGCCATGTCTTGGGTGATGGAGTGATTAGAGGTGCTACTACGCCACAAGCGCAACCCTACAAGAGCACAAACAAAGTGGAGTTTTACGTACGTGGTGCTGTGTTGTGCTTCTCTCTCATCTTTTGCTTGCCCTTTTTTTCACCTTTTAATTTGC
circ_000077	chr4	166194834	166194970	+	Zm00001eb188600	166194834-166194950,166194954-166194970,	2	exon	134	GT-AG	CTCACCAGCCTCCTCGTCGATCTCCTCCCACCCGCATCCAAGGGTTTCCTTCTCGACCGTGCGGAACGAGCCAGAGAACAGGTATGGCGGCGGCGCGGCACCTCAGATCCGGCCTCCCCCTCCTCCGCGCCCAC
circ_000078	chr4	82175721	82175962	+	Zm00001eb179170	82175721-82175962,	1	exon	242	GT-GG	CCCCCACGAAATCGCGGAACCTACCCACGAGCCGAGCCATGCTCAGCCGACTCGCCGCGGCGAGGCGACAGCTACTGCTATCCCCGGCCGTCGCGTACCGCTCCTCCTCGGCAGCGGCGACGGCGTCGGCGGTCCACGAGAGAGCAGCGCCCGCCTCGGCCTCCGTGCTCCCGGACACCCTCGAAAGGGGCTCCGACGCGTACCAGCGCAACACGGCCGCCGTCGGCGGGTTGCTCTCCGAC
circ_000079	chr4	180058348	180058617	+	Zm00001eb192680	180058348-180058456,180058462-180058617,	2	exon	265	GA-AG	CTCCACCACCGCTTCTACCACGGATTCTGCAAGCACTACCTCTGGCCGCTCCTCCACTACCTCCTCCCGCTGACGCCGTCCTCGCTCGGTGGCCTCCCTTTCCAGCGAACGCTCTACCACTCCTTCCTCTCGGCCAACAGGGCGTTCGCCGACCGCCGAGGTGCTGTCCCCCGACGAGGACCTCGTCTGGATCCACGATTACCACCTCCTCGCGCTCCCGACCTTCCTCCGCAAGCGCTTCCCGCGCGCCAAGGTCGGATTCTTC
circ_000080	chr4	188077488	188077674	-	Zm00001eb194780	188077488-188077674,	1	exon	187	GT-AG	CTCCCCTCCCTCCCCACGCCCACCGCCCCGCATCCACCCCGAAACCCTAGTGGATCGTCGCCATGGCCGCAGCCGCCCTCATTCGCCGCCTCCCCGCTGCCCGGGCCCAGGCCCCGGCATTCATGGCGGCGCGACCGATCTCCGACTCCACGGCAGCGTTCACCATCGAGACATCTGTCCCTTTCAC
circ_000081	chr4	10942229	10942604	+	Zm00001eb167790	10942229-10942437,10942524-10942604,	2	exon	290	GT-GG	CCCACCGACTTCGCCGCCTCCTATGCCGCCGGACTCGACAGCCCCTCCCTCTTCTCGGTTGCGCTCCGCTTCCCGGCGCAGGCCGCCGGCGCTGTGGGCGGCGCCCTGGCCATCTCGGAGCTGATGCCGGCGCAGTATAAGCACACGCTCGCGGGCCCCTCACTCAAGGTGGATCCCCACACCGGTGCCCTAGCCGAAGGGGTGCTCACCTTCGTCATCACCCTGACCGTGCTCTGGGTCATCGTCAAGGGCCCCCGCAACGTCATCCTCAAGACCTTGCTGCTCTCAAC
circ_000082	chr4	211477727	211479622	-	Zm00001eb200990	211477727-211477732,211477911-211478032,211478185-211478244,211479617-211479622,	4	exon	194	GC-AG	CTTCTTATGATCCAGAAGTGCCTTCTGTTGAGCCTTCACTATAGTCCCAGCAAAACGACTCCTGAGCATTGCTGCACGAAGAGCCCTGCTTGGTGATAAAGGTTCATCACAAAGGTAACTTTCCTCACCTTGTACAGAGGAGGCGATAGGCGAAGTAGAAATGTCATTGCAAGACCATGAATCATTTCCCAAGC
circ_000083	chr4	164418555	164419569	-	Zm00001eb188190	164418555-164418591,164419293-164419569,	2	exon-intron	314	GT-GT	ACCACCCTATGCTCTCTGTCCTCGCCCGCAGGGTAAGATTGCAGCAGCAGTGAATTTGGGAGCTTGAAGCGTTCATCCGAGACATGGAAAAAGTGATCTGCCGGGCATATCTCCTTCAATGCAAGCGATTCTTTTCGAAAGAAACTCTTGATTGGTGTGTCTTAGCCCGTGGGAACACCCATCTCTCCTCTCTGGTGAACTACACATAGTGGTTATATGCTCCTCTATGCTCCACAACAAGCAGGCTGATGCGATATTTTCCTGAAGTTATTATATTCCAGTCTATGCCAGACATCTACATGTAACTCCACCAC
circ_000084	chr4	193876786	193876953	+	Zm00001eb196870	193876786-193876953,	1	exon	168	GC-GG	CCCGTCTCCGCCGTCCGTCCTGCCACCGCTTGTCCCACAGCCACCGCCGTCGTCGGTAATACCGCCGTTGTTGCCGTTGGTTAAGCCGCCGCCGCCGCCACCGCCGCCCCAGCTTCTTCCACCCCTGGTGCCGGTTCTTCCTCCGGGGGTGCCTGGCGTACCGCCGGC
circ_000085	chr4	55571493	55571626	+	Zm00001eb176160	55571493-55571626,	1	exon	134	TT-AT	ATATTGTATCTAAGGGACATTGCGGATGCCGACAAGTTGGTTGCAGCTATGCAGGCAAAGAAGGGTGGAAAGGCTGTGATTGTTGGAGGTGGTTACATAGGGCTTGAGCTTAGCGCTGCCTTGAAAATCAACAA
circ_000086	chr4	189814752	189815017	-	n/a	189814752-189815017,	1	intergenic	266	GT-TG	CACCACATCACATGCTCTTGCTACTACCACCACCTCCTCCGCCATTTGGCATCGTCGCCTCGGGCACCCTGGACCTGACGTCATGTCCCAGCCACTCAGACATATCCTATACTCGGGGCTCTTCTGAGCACCTCTGTCATGCTTGTCAGCTCGGCTGTCACTCACGTCTTCCTTTTTCCACGTCCAGGGCTGTTTAGGCCTTTGATCTTGTCCACTGTGATCTCTGGACGTCTCCTGTCCTTAGCCTCTCCGGCTACAAATACTAC
circ_000087	chr5	54053419	54054133	-	Zm00001eb226150	54053419-54053465,54053715-54053734,54053844-54053997,54054075-54054133,	4	exon	280	GC-AG	CTCAAGGGCACATATGTCATCATCCTGGTTAACCAGTGTTAGAAGTCCATAATCTGTATGAGCTCCACAGCCAGTATCAGTGCGCTGCTCTTCTGGAATATCTACGGGATAACCAATCAACCTTAACACCCAGAAAGGATCTCCAGCTGTATCCCCTTCAAAAGCATCAATTGCCCCTCCCAAAGCCAAGGCTATACCTCGCATTATCTTTCTTGAAATGTCTCTACATAATTTGATATAATTTTCCAGCAGTACTTCAAAATTTGATGGGTATTTTGGC
circ_000088	chr5	76964216	76964560	-	Zm00001eb231340	76964216-76964560,	1	intron	345	GT-AG	CTCACTGCCGCTTGCCTGGTTTTGCAAACCTGAAACCCCCCAACTAAATTACAAATACTAAGAAATACCAGAAAGAGATTTACAGAATGAGGATTATGCATTGTTGGATCCAAAATCTGAAGTGGCAGAGCAATATACTTAGGTCCATTTTGCCATGTGAGTGCCCACACTTTGTGTGACCATTCGTATGGGCGGGGCTTGCCGATTCTCTAAGTGTCAGGGCCATGAGGTTGAGCTTTCGCAACCCACACAAATGTCCACCAAAAGAAGTTTAAACGTGTGAGGGTGCGCGCTGATGTGGTCCTCCTTCCTCGCATCGGCAGATGAAGAGAGCTCGACGGTCAC
circ_000089	chr5	97157529	97158512	+	n/a	97157529-97157586,97158207-97158285,97158364-97158512,	3	intergenic	286	GA-AG	CTGTGATGCTTGAATTACTGTTAGAGTTATAACACCAAGGAAAAGGAGGAGGTCCATTATGACAAAAGACACCACCCAAGAATGGTTTATAGCTGTATAGCCAAGCCATCCACCAAATGATGCTGGGGAAGCTGGGTCTCCTACACTTCTTATGATGGCCATTACACCAGTAATAATCATTGCAGAAACTTCTAGGATAAGGAACATAAAGAAGTCCCATTTGTTCCGATCGTCTCTTTGATTTTGTGAATCTCTTATATTCTTGTTGATGTAACCAGGATCTTTC
circ_000090	chr5	15434510	15438178	+	Zm00001eb217950	15434510-15434638,15435317-15435405,15438173-15438178,	3	exon	224	GT-AG	CTGCTGCTAAGTTCATGGAAAAAGAAGAGTTCCTGTGCTTTCCCTAATATCCTATGATCACGTTTCTTAGCTTCCTCTAGAAAATGTTTATATTCCTTCAGACAAGCGAAAGCTTTGACAAAGGAAGTATTTGGGATGTGTGGCCCACGGCATAGGTCAACTAAAGGACCACACCTGTATACAGTAATGGTCTTGTCCTCAGGCAACTCATTAATGATTTCAAC
circ_000091	chr5	19108436	19108631	-	Zm00001eb219040	19108436-19108631,	1	exon	196	GT-AG	CTTCATCCGGCTGAACCACTACCCTCCTTGCCCGAGCCCCGACCTGGCCCTCGGCGTGGGGCGGCACAAGGACGCCGGCGCCCTGACCATCCTGTACCAGGACGACGTCGGGGGGCTCGACGTCCGGCGGCGCTCCGACGGCGAGTGGGTCCGCGTCAGGCCCGTGCCCGACTCGTTCATCATCAACGTCGGCGAC
circ_000092	chr5	64440739	64441088	+	Zm00001eb228340	64440739-64440744,64441022-64441088,	2	exon	73	GC-CT	AGCGACGCAGGCCGACGTCACGGCCTTCTACGGCAGCCTCCTCTCCAACTACTCTGCCACCATCACCGCTGGC
circ_000093	chr5	51389697	51400792	+	Zm00001eb225640,Zm00001eb225650	51389697-51389702,51400337-51400462,51400637-51400792,	3	intergenic-genetic	288	AA-AG	CTCATCAGGATGATGGAGACGGAGCTTTATCACATCTGGATGCCATGACTCCCCATCCCTCATAGGAATTTGATGAAATGTTGCACCAAATAATGATTCAACGAGAACATTTAACCCTTTTAGGCACTGCGACAAGGGAAAGTATTTTGCAATAACTGAAGCGTCCAGGTCATATACAGATGATTTCATCATTCCAATGAAGTAATCCTCATCCCAGGGTTCTAGATCGGCACTCTTTTCATTACATGTTCTTCTCTTGAAATTATGTATGGTCTTAAATTCTATTTT
circ_000094	chr5	660357	660464	-	Zm00001eb210320	660357-660464,	1	exon	108	CT-TG	CAACTGGAAAGAAGTTTCTGGTAGTGTAAATTTCTTTGTACATATATTTTCCTGGATGTCTTGACTGAAAGGTGGAAGCAAATCCTCCAATTCTCCAAAACTTCCAAG
circ_000095	chr5	198804184	198804311	+	Zm00001eb250330	198804184-198804311,	1	exon	128	GT-AG	CTTTCCCTCCCCACCACCTACCTACCGCTTATTCACCGTCGCCTACCACCTCCCCCTCCTCCACGTGCCGACTTCCGCTCCGCACCGCCAATCCGTCGTAACCCTAGCCTAGCCCAGCCTGGCCTCAC
circ_000096	chr5	11866964	11871295	+	Zm00001eb216400	11866964-11867141,11867287-11867423,11871290-11871295,	3	exon	321	TG-AG	CTCAATTTTGTATGTATTGGTTGTGCCCAGACTTCAAGTCTGTCTGCCTCATTCTGAGAAAGTGTCAGAAGTAACTGTTTACGCTTTTCCCTTGCATTTGTGTAGTTGTCAACACAGCCCCAAACAGGATGAATGTGATCTGCCATGCTAGGTTCACCTTCACGTCCCTGTAACTTTGAAACCGAATCGACAGGACCACTGGTGCGCTCATTTTGTAGAAAATGAACAAATACTGACACAGATTGAGCTTCTCTCTGAGCATAAGTTTTGTTTGGAGATTCATACCACTCAGGCGCATAAGAAAACCATCCCAAAGCAGCA
circ_000097	chr5	68420184	68420479	+	Zm00001eb229270	68420184-68420479,	1	exon	296	GG-AG	CTCCTCCCATCCTCCTCCTCAGCGCCCTCCTCCGCCACGTCCGGTCACCTCAAGAGGATCCTCGCCGGCCTGCAGGCGCACGGCGACGAGTCGCGCCAGCTCCAGTCCCTCATGCAGCTCTGCGAGATGCTCTCCATCGGCACCGAGGACTCGCTCGCCGCCTTCCCGGTCGATGCTTTTGTCCCAATCCTCGTCGGGATGCTCGGCCGCGAGGACGAGCCTGCCACCGCTGGTGCCAGCCCCGACGTCATGCTGCTCGCGGCGCGGGCACTCTCCAACCTCGTTGATGTGCTCCC
circ_000098	chr5	59242838	59243003	+	Zm00001eb227090	59242838-59243003,	1	exon	166	AT-AG	CTCGACACGGAAGTTCTCATATATGGGATGTCTAGTAGGAGCCTTCACACTGTAAGATCTTTTAGGATCAATAACTGTCACTGTGTCATCGTGATCTCCATATTTCTCTGAAAATGCTTCTCCACTAATCACCTCTGGAATGTCTTTTGCATAAACAGCTTCATAT
circ_000099	chr5	187373674	187374111	-	Zm00001eb246860	187373674-187374111,	1	exon	438	AT-AG	CTGGAGCACGAGCAGCGGGAAGGAGGAGATGTCGTCCGTGAAGTCGACGGTGGGGATGAGGCGCTTGAGCTCCATGGTGGGCGCGAAGTCGCCGAAGTAGTCGATGGTGGCGTCGGGCGCGTCCGCCTCCTGGAACAGCACCCCGCCCGCGTTGCAGTCGATCTCGACGCGGCCGTCCTCGTCGCGCGCCAGCCGGCCGGCCATCGGGTAGAAGGGCACGAGCGCCTCGGCCAGCGCGCGCCGCATCCGCGCCCCGTCGAAGAAGCTCCCGTCCGCGCCCGCCAGGTCGTTCCCGTCCGCGTCCTCGCGGCGGAAGAAGTAGACGCTGGGCGTGTGGAACCGCGGCACCACCAGGTCGGGCCCCGAGTTCCAGAGCCGGCGGCGCGGCGTCTCCGCCGC…
circ_000100	chr5	6985142	6985449	-	Zm00001eb214440	6985142-6985207,6985360-6985449,	2	exon	156	AA-AG	CTTTCCGAACGGAGAAACCAGCTGCTGCAGAGCTATGATCCTCTCGCCGAGCCTCTCCCTCCTCACCCTGGGCCTCTTGTTCGTAGCACCAGCAGCCGTAGCAGGAGCAGCGGCGGACGCAGCCTTTCTCTGGTCGCTGCTGCTCCTTGATCCCTT
circ_000101	chr5	210258595	210258957	-	Zm00001eb252510	210258595-210258697,210258775-210258957,	2	exon	286	GT-AG	CTGATAGAAGCTTAGCAGCCCGGACAACAGATGCTCCAGCTCCTAGTGCAGAAGGATCATAAGCGACCAGGACAAAGTTGTGAACAGGATGGAGGAAAACAACCTCCCCAGGTATTTCAATGGGATATGCAGCAAAAGAAAGCATTATATCAGAGATAGATACAGCCACTGTATTCCTATCAACTGCAACCAGACCCAGGTGTTCAGAATGATATATTATAACCCCTGTTCCAAAAAAATGTTGAGAGTGAACTCCATCAAGCATGCAAACGGGCGGCACATGCAC
circ_000102	chr5	70373670	70374677	+	Zm00001eb229610	70373670-70373820,70374643-70374677,	2	exon	186	CG-CT	AGCAACCTTGCTGCAATCTATGATGCTATGGGAAGAGTGGAGGATGCAATCGAGATCCTGGAGCATGTGCTGAAGGTGAGGGAAGAGAAGCTTGGCACGGCGAACCCAGACGTGGATGACGAGAAGAAGCGGCTGGCGGAGCTCCTGAAAGAGGCGGGGCGGTCTCGGAACCGGAAGCAGAAGTCG
circ_000103	chr5	36841480	36841809	-	n/a	36841480-36841809,	1	intergenic	330	GG-GG	CCACACCACCCGACATCTTCTCCGACAGTTCATTAGGACCCAAATTCAAAATTTGGTCAACGTCATGGTCCTCCAAGGATACATCCCTGTCCCACGGAATGTCTTGAAGTCCCAAGACCTTTGCATGATGCATGTACGGAGCATTAGGGATTGCAGGTGTGACACCCTCCAACACGCAGGGTACCGCCTCGCCACGCGAAGTCTCGGCAGATTTTGCATGGTTAGCAGAAAGGTCGACCCTCTGCTTCTTCAAGCGAATGACGTCCAGAGGGTTCACAATGCGTAGGGGGGCCTTAACCTTCGATGCACCTCCATTCATTGTATCAAGCC
circ_000104	chr5	224807111	224807423	+	Zm00001eb259240	224807111-224807423,	1	exon	313	GT-GG	CCTTCGTGTCAGAGGGTCGGTCTCCACCGAAAGCCTCGCAACAAATCTCCTCCGTTTCTTGCTCCGGCCATTTGTTGCAAAGATCGTGTTTTCCCCCCCTCATCCATGCCTCGCGTTCCATCCCTTCCGTCCCCGGAAATCCCTCCGCTTTCTTGAGATCTCCCGTTCCTCGATCTGACCTCGCCTCGTCCCGCCACCACAAGCAACAGCTGTTTTGCGCCACGATCCTCAGGGTTGCGATTCTCGCGTCCATTTGCTCGCCCCAATACCTTTCGGGAGCATCTGATCTCGAACAGTGAGACAAAGTAGCCAC
circ_000105	chr5	222692903	222693287	+	Zm00001eb258130	222692903-222693064,222693146-222693287,	2	exon	304	GA-AG	CTTAACAAGAACTGCACGGCAGAAAGATGGTCGAATCGGAAGACCGAACACGCGGATTTGAGATGGTTGTAGATCATCCAGTGCTGCCCGCTTGGCAACTTCTTCTGAAGGGCAGTAACATCTATTCACATCAGCATGAAACCATGTAGGGTGGCATGTGTTGAGGTCTGTGATCACAGTTACAAAGACTACCCTGTTCTGTAGGCCTTGCCATTTGAGAACCCACAGAGGAATGTGTTGCATGAGGGGATGGACACTAATTATGATGTCTGGCTTGTACTTCTTCAGTCCAGCCTCCACCTTC
circ_000106	chr5	30154032	30154751	-	Zm00001eb221820	30154032-30154187,30154469-30154520,30154632-30154751,	3	exon	328	GC-AG	CTTCACATATGTACTTAAAGGCCATAGAAGCAGCCGCAGCTGTATCCTCTGATGTACTCATACCCTTATTGAGAATATCAACTAGAGGTGGTAGAATAGATAATTCAGCTGGTGCAGCATCAATCCATTTTGAAAATGCTCCAATGGTCAAACAAACTGTTTGTAGCAACTGCTCATGTTGAGGAAGGCAGGGAAGCAGTGACATAATCTGTGGTAAAATTTCTCGCTCCTCAATTGAGACTGATCTAGCAATTGCTTGTATACAAAACAGGGTAGCCTCTACAGGTTGCCACTTGGAGTTCTGCTCATTGTTGCAGCTCCCATATGC
circ_000107	chr5	6347754	6347843	-	Zm00001eb214090	6347754-6347843,	1	exon	90	GT-AG	CTCTCCAACAGAAACACTCTCGCTCTCTTCATATATTGTGCTGGCACCATCTCTGTCTGAACTGTCCTGGTCCATCTCGCTCTCGATAAC
circ_000108	chr5	54160368	54160644	-	Zm00001eb226160	54160368-54160644,	1	intron	277	GT-GG	CCTTATTAACTTTTGTGGTGATGTAACTATGTAGATCAGTACTATAATTATGTTTTCATATTCCCAAACAGCAAAAATTATAGAAAAGATGAAAATGATGGTTCAGTTTTCGAGTTAAGATCAAGCCATGTGCTCACCCTTATTAAATTTTTGTGGTGATGTATCTATGTAGATAAGTACTATGATTATGTTTTCATATTCCCAAACAGCGGAGTTATAGAAAAAAAAGATAAAAATGAAGGTTCGGTTTCAAGTTAGATTCCAGCCATGTGCTCAC
circ_000109	chr5	221972526	221972717	+	Zm00001eb257770	221972526-221972717,	1	exon	192	AC-TG	CACCACCACCACCGCCTCCGTCAAAATCAGGCATGACGCTGTTTCCTTTGACACATGGTGAAGAGGTAAAAATCACTATAGAAAAAGTCGTACCACATCAGCCTCCGCATCCACCAGCAGCAGCAGCGTCATTTTCAAGCTCAAATCCAGATGCTGTATCTGTAATTCTAGCTCCACAAAAGAGAGCTCGGT
circ_000110	chr5	66236806	66237598	-	Zm00001eb228700	66236806-66236980,66237251-66237376,66237489-66237598,	3	exon	411	TA-GA	TCTGTCATTAGTCTCAAAATATCATGTGCGCAAGGCTCATTAGAACGCTTCTGAATTCCATATAGTTGGCATGAGACAACATATGTAAACTTCATGTCGGCTATAGCCTTGCATTGAGTCTTTAATGGTGAGTCCTCAGACATTACTTCCATTGCTCTGTAGCCTTTCATAAGATCAGTTCTTGTTAATGTCTGCCCCCTATATGACACCCAAAGACAAAGCTTCTCTTCCAGCTGTTCATCTTCACGGAGTACCTCTTCATTCTTGCAGCCCACCCTTTCGAGGAAATTTTTCCATTCATCTGGGTAAATTTTTTGCAAGTAGAAAAGAATGGAAACTCCATCCTCATTTCGCTCTTCCAGATTTTGTAATGAAAACAGAACATCTTCCTTGTAATAA…
circ_000111	chr5	185966564	185967918	-	Zm00001eb246590	185966564-185966599,185967691-185967776,185967861-185967918,	3	exon	180	GG-AG	CTCCAGCACGTTTTGTTCATAAAAAAGCTCAGCAACCATAGATGGATACATTAGAGAATCAAATACTGTATCTGGCCAACCACACAAGGCTGAGTTTACTGCCGCCACTTTCTTCTTGACACGTTTGTCTAGCAGATCCTTATCCAACTTTTGAGAATTATTTTGTGTTGAGTGAAATCC
circ_000112	chr5	69451670	69451851	-	Zm00001eb229450	69451670-69451851,	1	exon	182	GT-CG	CGCCTCCTCGACCTCCACCTCCACGCCAACGACGACCTCTTCTTCCCCTTCCCTACCCCTGCCTCGTCCTGCCCCTACATCACCGCCTCCTCCGCCCACCACCGCTTCCTCCTCGACGACCACCCCTTCTACCCAACCTCCTGCCCGCTCGGCATCACCTCCCGCTCCCCGATCGACGACAC
circ_000113	chr5	32271670	32271826	-	Zm00001eb222270	32271670-32271826,	1	exon	157	GG-GG	CCTGAGGCCCAGACCTGATCTCGCCGGCGGCGAGCTTGTGTCCATGGCTGACGGGGCCGAGATGGACGAAGAGGCTATGCGGGCCTTCTTCCCGCTCTCCTTCGGAAAGGCGGCTCCGCGGCCCAGCTCTGCTACCTCCTCCGCCCACTCCAACACC
circ_000114	chr5	36013582	36013753	+	Zm00001eb223190	36013582-36013753,	1	exon	172	AT-AG	CTCCCCGTCCAACTGAAACCCCCATCGCCACGCCACCACACACCTGACACCTCCGCCGCGCCCGCGCCGTCTACCATTCCGGCGTCCAGCACCTCCCTAGTCGGCTAGTCCCTCCCCGCCGCCGCTACCGTCACGCCTCCTCCCTTGCCCCCACCACGCAAGTCCCAACCAT
circ_000115	chr5	208530391	208539859	-	Zm00001eb251910	208530391-208530396,208539706-208539859,	2	exon	160	GT-AG	CTTTGACAATCTTAATAAAGAGACCTCCATGATAGCCTGCTGGTAAAAGGCAGGCTGATTCTTTATAACCTTCACTGCAACATAACTGTTAGTTTCTGCATCCCAGCATTTCGCAACCTGTCCAAAGGTACCTTGGCCAAGCATTTCTTGGACAACATAC
circ_000116	chr5	7581842	7582235	-	Zm00001eb214840	7581842-7581865,7581969-7582052,7582170-7582235,	3	exon	174	GT-TG	CAACACTTCTATCTACATGAACATCATGTCGTAACGTGAGACTATCACCATTTCATTTCTTAATAGAACTCAAATTACAGAAAAAGACGTTCTTGAGAAAGCATATCTCTTCGACTTTTGATACAGTAGCGCCATCCTTAATATGTCCCACATTTGAAGCTTTTTTATTTGCAC
circ_000117	chr5	197529377	197529649	-	Zm00001eb249900	197529377-197529649,	1	intron	273	GA-AG	CTGCCCAGTTTTTTTGTAGCCATAACCATCTCATGCAAAGTGCCCAACAAACTTCAGGGAGACTCGAAATTCCCAACCCTCCCAAATGCAGAGGTCGGCATACATTGCCCCATGCGACCAAGCAGTGTCCTCCATTTACTTCTTTTCTACCTTTCCATAGGAAGCCTTTTCTTATTTTATCAATGACATCAATGGCTCATTGGGGGAAATCAATTGCCATTGCTGCATAAATAGACATCCCAGTAAGGACATGCTGCACTAGGATTCTTCTTC
circ_000118	chr5	89453770	89525174	-	n/a	89453770-89453879,89525169-89525174,	2	intergenic	116	CT-AG	CTTTCGACAGGCAAAACGTTGTGTCAGTTCACTAATGTGCCTTTTTACTACTGGAAGCTCCAATTGCTCCCTTGAAAGTTGAAACTATCAGAGTATATCCCAGTAGGAAAAGGCAG
circ_000119	chr5	35853804	35854058	-	Zm00001eb223160	35853804-35854058,	1	intron	255	GT-AG	CTCCCCCACCCGATGCCTTACCTCTCACATTGTCATTGGCAATGGGAATTTTATTCCTGTCACCTCCACTGGTCACACTCTTCCTCAACCTTTTTCTTAAAAATGTGCTAGTTTCCCCCTCGATCATTAAAGATCTCATGTCCGTCCGTCAATTTACCACTGACAACAATTGTTTTGTCGAATTTGATCCATTTGGCTGTTCTGTGAAGGATCTCCCCACTTGATGCGAGCTCATCAAATGTGATAGCTCCAGAC
circ_000120	chr5	225762712	225763506	+	Zm00001eb259590	225762712-225762821,225762919-225763044,225763171-225763239,225763326-225763506,	4	exon	486	TG-AC	GTGGTCATCAATCTCAGAATATCCTGTGCATGTGGATCACCAGAACGTTTCTGAATACCGTATTGCTGGCATGATACAACATATGTGAATTTCATATCAGCTATAGCTTTGCATTGAGTCAATAGTGGTGATTCATCAGATTCAGATAACAGGTCAGCTGCTCTAAAACCCTCCATAAGGTCATCATCTCTGGCCATATCAAGGGAAGCCTGAAGGACTAAAGCTTGTCTGTAGTACATCATCCCTCTTACAGTTCTTGTCAAAGTTTGTCCCCGGTATGATGCCCAAAGGCGAAGCTGCTCTTCAGAATGCTCAGTCTCGTGGAGTTGATCTTCACTCTCACAATGCACCCTTTCAAGAAAATTTTTCCATTCATCTGGGTAGATTTTTTGCAAATAA…
circ_000121	chr6	47959983	47960963	-	Zm00001eb267130	47959983-47960072,47960764-47960963,	2	exon	290	AG-AG	CTTACCACAGCCTGGATGTGGACAGACAAAATCCTTTTGTCCTGTGTGGGTAAGATAATGCCTCTTCAACTTGGAGCTATCAACAAATTTCTTCCCACAGTTGGGCTCGTTGCATATATACTGCTTCTCGTTGTGCACGCTAGCATGCTTGCGGAGCGCGCTGACATCAACAAAGGTCTTGCCGCAGTTCTCGTAGCTGCAGAGGAAGAGGATCTCCGTGGTGGGTTCAGGCTTGGGGGCTTCTACATCTAACACTCTGGGGTTGTCCTTGGAGTTTCTGTACCCATCCT
circ_000122	chr6	88394149	88394328	+	n/a	88394149-88394328,	1	intergenic	180	GC-AG	CTGCGCCACGCGCGGCCCCGTCGATCATGCCTGCGACACGCCCGGCCCCGATGACCCCGCCTGCGCCACGCGCGGCCCCGTCGACCCCGCCTACGCCACGCGCGGCCCCGTCGATCACGCCTGCGCCACGCGCGGCCCCGTCGGTCACGCCTGCGCCACGCGCGGCCCCGTCGGTCACGC
circ_000123	chr6	179468907	179469234	-	Zm00001eb297530	179468907-179469234,	1	intergenic-genetic	328	GT-TG	CAAAAAGACTAAGGCCCAGTTTGATTTGAGGGACTAAAGTATTGGCTGTTAAAACTGTCAGATGCTAACAGCTAACTACACAAAACAGCCCCAGGAGCAGTCGCCGGTAGAACATGGAATGTCACTTGTGTTACCTGAACAAGGGAAATAATGCGCCAATTGTGTAACAGCACAGGCAGTAAATAAAGTAGTAACGAAGCCATCATGTGGAACATATTAAACTTTAGTAACTGCTTACACCAGACTAATTCTGGTTCAAGAAAAGAGTATACTGATTCCTTTCACAACAAAATCATGTTGCGCCTTAACTATATATATCAGGTTTAAC
circ_000124	chr6	128710334	128714738	-	Zm00001eb280650	128710334-128710339,128714597-128714738,	2	exon	148	GT-AG	CTTTACTTTTTCCAGTAATGAGTTGGCGGCTGGTGAGAATTAGAGTGTCTTTTCTGGATTGTATATAAGCATTCCCTAGTTCAACAATTCGTCTGATTTCTTGGTCTCTGTCCTCCATTGATTTCATTGAAACCATCTCGACAGACAC
circ_000125	chr6	177014005	177014154	+	Zm00001eb296480	177014005-177014154,	1	intron	150	GT-GG	CCATCACCACATTCCACAACTGGAGATTTGAGCAATCGATTTGCCAAGTGGCACACGTCTGCAGCTGCACGATAGCGCCACATATCGTCCCTCCTTGTTTTACAGCTTCAACTTTCACGGACTGGTCGTCAGTTCTAGCGCTTCATACAC
circ_000126	chr6	146509238	146509383	-	Zm00001eb285030	146509238-146509383,	1	exon	146	GT-GG	CCTCGCCAGCCTCGTGCAGAACTTCCAGCTGCTGCCGCCGCCCGGCCTCGACAAGATCGATACCACGGAGAAGCCTGGCCAGTTCAGCAACCAGATCGCCAAGCACGCCACCATCGTCTGCAAGCCCCTCAAGGCCTAGAAATCAC
circ_000127	chr6	51906548	51906691	+	Zm00001eb267490,Zm00001eb267500	51906548-51906691,	1	exon	144	GG-AG	CTCACCCAGCTCACCATCTCCTCCACCGGCGTCTCCGGCCCGGTGCCGTCGTTCCTGTCGCAGCTAACGGAGCTCACCCTCCTAGACCTCTCCTTCAACTCCCTCGACGGCGCCATCCCGGAGACGCTCGCCGACCTCCCCGCC
circ_000128	chr6	90524533	90535891	+	n/a	90524533-90524604,90524704-90524775,90524867-90524938,90525781-90525852,90535820-90535891,	5	intergenic	360	GC-AT	ATGTAATTTGAGGTCTTATATGAAAGCAAGAGTCCTCCTATTGATCCTGATAAGTTGTTTGATGTCAAATCCAGATATTTTAGCTTGGGCAAGTTTGGGGGAGTATTAGGAACCTGACCTGTAAGACCACATTTTCTCAGAGATAGGACTTCAAGATTGCTCAGATTAGAGAAATTTTTTGGAATAGGTCCTTGAAGATTCGTCCCATATATTCGCAAGTCTGTGAGATTGGTTAAGTTCTGAATAAATGCCGGAAAAGGCCCTACAATGTAATTATCAAACATCCACAGGGACCGTAGATTCCTTAAAAGCGACAGTTCATGAGGAAAACCTCCACTGAGAGGATTATTATTGAAGTGC
circ_000129	chr6	19970048	19970305	+	Zm00001eb263000	19970048-19970305,	1	exon	258	GA-TG	CAGGCCAACATCAACCAGCTCGCGACCGCCCTCACCAACAACGCGTCCTCCTCACCGTCTCTCTTCGCCGCCGGCGCCGCGGGCAGCGCGCCGGACGTGGCCTACGCGCTCGCGCTCTGCCGCGGCGACACCAACGCCTCCTCGTGCGCGCGTTGCGTCGCCGCGTCGTTCAAGACCGCGCAGCAGCTATGCGCCTTCAAGAGGGGCGCCACCCTGTACGACGACCCCTGCATCCTCCGCTACGCCGACTGGGACTTC
circ_000130	chr6	128711964	128714738	-	Zm00001eb280650	128711964-128712074,128714597-128714738,	2	exon	253	GT-AG	CTGAAGAATAGCAGGACTCTTTTCAGCCTCTGCTGCTGCAACAACAGCTTCAATTCCCTCAAGGTTATACACATTGAAAGCACCAACAGCATAACCGCCCTTCTCCGCATTTTTTTCCAGTAATGAGTTGGCGGCTGGTGAGAATTAGAGTGTCTTTTCTGGATTGTATATAAGCATTCCCTAGTTCAACAATTCGTCTGATTTCTTGGTCTCTGTCCTCCATTGATTTCATTGAAACCATCTCGACAGACAC
circ_000131	chr6	43775378	43775472	-	Zm00001eb266560	43775378-43775472,	1	exon	95	GC-AG	CTGTCTCTACCCTTCCCTCCTCCATTTCTACATCTCCCCGTTGCTGCTCTGCTCCTGCTGCCACAAGAGTATTCGCCTTCAATCGTTGCTCGCGC
circ_000132	chr6	159221031	159221546	+	Zm00001eb288490	159221031-159221546,	1	exon	516	GC-AG	CTTTGGCAGGTGACAGAGCTTGTCCGGCGCCGCGTCGTCGCGCTCGCGCAGTCGAGCCGGGGGTGATCCCCCCATGCGGTGGCGGTGGCCGCGGCCTTCGCCATCGTCGTCGGCGGCGTCTTCATGGGAGCCCGATGCGCCGCGGGAGGAGGAGGAAGCCAGGCCGGGCTTGATGAGGTGCTCGAAGATGGCCATGAGGAGGAACATGGAGACGAGGACCGCCGTGGCCGCGAAGCCGAAGGAGATGGCGCTGGCGTTGGTGCCGGCGCCGGCGCCGGCGCCCCTCATGGCCGCCGTGGCGTCGTCCCTCGCGACGTCGGCGGCGGCAGGCTCGGACGCGGTGGCGCCAGAGCCCGCCATCCCCACCCACGGCCTGGTGGACGTCTGCCCCGCGAACCT…
circ_000133	chr6	166462928	166463155	-	Zm00001eb291070	166462928-166462996,166463084-166463155,	2	exon	141	CC-GT	ACGACATTCAATTTGGTCATGCTGCTTAGATCTGGCAACGGTCCAGTGAGCTGGTTGCTGGCCAAGTTCAGCTCGTTCAGATTGACCAAGTTGCTGATGTTAGGAGGAATCGTTCCCTTAAGGCTGTTCCTATCTAGTCGG
circ_000134	chr6	5633839	5634032	+	Zm00001eb259900	5633839-5634032,	1	exon	194	GT-AG	CTCGTCTCCCTCCCGTATCTGCAAGCCTTGATCCCGCCGCCAGCCATCCATCCAAGGGAGCCATGTCTCCATCCGGCGAGCTGCTGGCTTCCATCTCCTCCGTCTTCACTGTCGCCTTCGTCCTCCTCGCCTGCGTCGAGCTCGGCGACGCCGCCGCCGCCGCCGTCGGCGTCTACCGCCTCATCCAGTACGAC
circ_000135	chr6	130481626	130483603	-	Zm00001eb280900	130481626-130481677,130481775-130481848,130483054-130483134,130483216-130483359,130483453-130483603,	5	exon	502	GC-GG	CCTATGTTTTTTCTTGGATGAATCGTATGATTGCACGGCACCTTCATAAAATCTCTTATCCAAAGGCCACCAAACTTTTATTCGGTGTCCTACCAAGTCTGTACTGCTTGAGTCTTGTGTTGAGCACTTATCCATATTTGCAGTCCTTACAGCCTCAAAATGGGCCAGTACTTTCTCACATCCCAGCCAAATCTGCTCATTATTCTCCACAGAATTTTCATTTTGGTTATCATGAAGCGGCGTGTAAAGTTGAGCAGGCAATGGAACTGTTTGAGCTTCTGATAAACTCGTTTGGTCTTGGCATAACCTCTTTGCAATAAGAGTACCAAGATCACATATAGCACACACAGTCTTGGTCTTACTTCCATCAACCACATCCTGTGAAGATTTTATACTTTT…
circ_000136	chr6	48041080	48041475	+	Zm00001eb267140	48041080-48041285,48041386-48041475,	2	exon	296	GT-AG	CTCCACCCATGGCGGCCTCCACCTTCAGCGGCGACGAGACGGCGCCCTTCTTCGGCTTCCTCGGCGCCGCCGCCGCGCTCGTCTTCTCCTGCATGGGCGCCGCCTACGGGACGGCCAAGAGCGGCGTCGGCGTCGCCTCCATGGGCGTCATGCGCCCCGAGCTCGTCATGAAGTCCATCGTCCCCGTCGTCATGGCGGGAGTACTCGGCATCTACGGCCTCATCATCGCCGTCATCATCTCCACCGGGATCAACCCCAAGGCCAAGCCCTACTTCCTCTTCGACGGCTACGCGCAC
circ_000137	chr6	43779627	43779816	+	Zm00001eb266570	43779627-43779816,	1	exon-intron	190	GT-AG	CTACCACACCGCCCGCCGCCGATCCCGTCACCCGTCTCCTCCCCGCTGCGGAGCGTCTCCAGCCCTGCCCGGTGCCCGCCCAGATGGTAAGCACGCGGCACCACACTTCACCTCCAGTCCTGTTCATCGGCTATGCGATCTGCATTTTCGTTTGCTCGATCGACGGATCTGCCATGCTCTTCTTCTTCAC
circ_000138	chr6	166934542	166934704	+	Zm00001eb291310	166934542-166934704,	1	intron	163	GT-AG	CTCCGCCTCATCACCACCACGAACCGCCACGCCGACCTCGCCTGCATTCTCTGTTGCATCCTGCGGTCCAACCATGAGCGAGGCCAACGACTTCAAGGCCCTCGCCGAGGCCCTCAAGTCGCCGCAGGAGTCCGTCGCGGCCAATGCCCAGGCCATCGCCAAC
circ_000139	chr6	153640316	153640471	+	Zm00001eb286850	153640316-153640471,	1	exon	156	GA-AG	CTCAACCTTCTCTCCTCTCACCTCTCTCTCCTCTCCTCCCACCTCTCGGCCCCGCGCTCCCATCTCGCTCACTCCTCGGCTTCCCTTTCCAGCCTCTTGGCCACAGCCGACCTCCTCCTCCACTCCCACCGCTTAGTGCGCCTCTCCTCCCGACTC
circ_000140	chr6	175311716	175313468	+	Zm00001eb295460	175311716-175311782,175311862-175311933,175312576-175312737,175313207-175313280,175313371-175313468,	5	exon	473	AG-CT	AGGATTTATCTATTGCTGTGAAAGCATCAGCTGAAGAAAGAAGCCTCCCACTAACTAATGCTGCCCTTGACCGTATAACAGAATCAGCTGAGGAATCATTGATGATATCAATTATGAGTTGAAGCAAGTTGGTCTTCAGCAGGAAAATGTTGCTGTGAGGGTGTTCAACAAGCTCATATAGGACCTCTAGCGCACTGAGGGTTTTAAGCATATCTCTTCTATCTTTTATTTCCTCTTCAAATATGCTCAGAAGGTTTGAATCACGAATAGCAGTAGCAGTATAACTTGAAACAGTGAAGAGCTTGGCTATCAAAGATAGAATACGAATCCGTGCCAATGAAGATGACTGAGCTGCCACTTTACCAAGTTGCACAGATCCTTGACCATCTGGTGGGAATA…
circ_000141	chr6	84737841	84738599	+	Zm00001eb271060	84737841-84737940,84738594-84738599,	2	exon	106	TG-GC	GCCAGACTTTACGAGGAAAACCGGTATATCTTGAGATTTCAGCACAGCCTGAATCTGATAGTTCTTCTTGAGCTTTGAATGTAACGCGATCACTGCATCAGCTTCA
circ_000142	chr6	174483213	174483473	-	Zm00001eb295050	174483213-174483288,174483360-174483473,	2	exon	190	AA-GG	CCAGCACGTGGGGAGAAAGCATTCTTGATGTGGAATCCAGTGGATCAACAGCAGGATAAATACCAAGCTCAGAGATCTGTCGTGACAACACAGTTGTAGCATCAAGATGGGCAAAGGTAGTAGCAGGAGCAGGATCCGTCAAGTCATCGGCAGGCACGTAGATGGCCTGCACAGATGTAATAGAACCCTT
circ_000143	chr6	175829618	175830130	-	Zm00001eb295750	175829618-175829907,175830125-175830130,	2	exon	296	GC-AG	CTTAGCTTCCGTGCCTGAGCGGGCGCTTCTTTCACCGTCGTTGCATCATCAGGAATGGAAACAGTCGACTTGGATGCTTGCTCCGCGTCTGAGGTAGGGAAGCCAAGGCCGAACGACGACAGAAGAGGATCAGCCGAAATGTTCGTGGCGCTGCTGCTGCTGCTGTTGTCGCTGGATCTCTGTCCGCCTCCTCCGAGGAGCACCTGCAAGTGGGCTTCCCGTAGATCTCGGCTCAGCAAAGAGAGGGCCTGGCTGCCTGGAATGATGAATCTGCGCAGCCGGCGGCGATTGCAGGC
circ_000144	chr6	150323390	150370859	+	Zm00001eb285890	150323390-150323510,150323593-150323667,150370854-150370859,	3	exon	202	CG-AG	CTTGCGCTGAAGGTCCATCATGGCCATATAGCGCTGCAAAGGGACCTGGTACTGCCGCAGGTTGTGCATGATCTTCTTAATTTGGAGTTCTTGAGGAACAACTGCAGGAGGAAGCAGCCCACGCAAGTGGTGTGCATCCCTCTCCTTCTCCGTGAAAGCAAGACCCTTGTTGTGATGTGGATCCCTCAAGAGGGTGTAACCG
circ_000145	chr6	163337736	163337903	+	Zm00001eb289850	163337736-163337903,	1	exon	168	GT-AT	ATTCTTTGGTCTCACCAGCTGGTGTGTCAGCATCTGCTTTAATTTCTGTTTTCTCATCTGGTGCCTCAACTGTAATTTCACCTGCCCTGGTCTCTCCAGCTAATTTGTCAGCATCTTCATTATTTTCTATTTTCCCCTTCTCGTCTGGTGCTTCCTCCTTAGTTTCAC
circ_000146	chr6	98645534	98645891	+	Zm00001eb273460	98645534-98645891,	1	exon	358	AG-AG	CTTCTCCCCCCCTGAAAAACTATCTACCCCACCCCAAACCACCCCTACCCGCCGACGAGCGCGATCGATTGATTCGTTTCGCGCCGGGCGGCGGCGGAGGGAGCCCACCAGATCCGGCTACCGCCGCGGCTACGATGAAGTCGCTGCTGCCGCGGAGCGAGCTGCGGCGCTCGTCGGCAGCGGCCGTGCGGTCGTCGGCCGGCGGCGCCGCGGGGGGAGACGGTGCTGTGGCCGACGGCGGCGGGGCTGGGCCGCGAGCGCCCGCCTCCTCCACCTTCTGGTTCCTGCTGCACGCGCTCTGCTGCCTCATCTCGCTCTTCCTCGGCTTCCGCTTCTCGCGGCTCCTCTTCTTCATGCT
circ_000147	chr6	178739869	178740086	-	Zm00001eb297280	178739869-178740086,	1	intron	218	GT-AT	ATTTTTTCACGCTAAAAATAACAGTAAATAACTGTACAAACCAATGAGGAAGCTGGGAAAGAGATTAAATATATTTCATCATTTAAATTTGGTTTCAGAAGGATGGGCCTGACGCAATAGTGAAAAGCCTTTCCACTGAGCCAAAAGGTCTTGGGTTCGACGCAACCTCTCTGTAAAATGAAGGGGTAAGGCTGGCATCGGTTATTCCTTCCCCAAAC
circ_000148	chr6	117200610	117201414	-	Zm00001eb278020	117200610-117200740,117200988-117201174,117201283-117201414,	3	exon	450	GT-AG	CTTGTTGGAAGAAAATTTTGGCTTCTATGTTACATCTTGGTGAGTTTGAAGCCAAAGCAGTAGGCACCCCGTTAGTCTTTAAATGTTTTATCAGTCGATTAGCTCCTGGAAGTGGTTTTAAGTTGCACCACTGCTCACTGAACATCGGAGTAATCATCGAGAGGAACTCTTCTGTAGAGTAAGGGAGTCCATAGTCTTCTAAAACAACAGCTGCAGCTTCATAAGGTGTCTTCCCAACTAGCTTGTGAGCTTTCTTGCTATCCCACGTTTTTCCATTCTTTAGAATAAATGGTTTTACTACCTTACTTACAACAGAATCTGTGTTTAAGAGGGTGCCATCCAAATCAAGAATGACGTGAGAAATAAGACGAGAAATGGGCTTGGGTGCTGCCATTCTAA…
circ_000149	chr6	117200610	117201414	-	Zm00001eb278020	117200610-117200740,117200833-117201174,117201283-117201414,	3	exon	605	GT-AG	CTTGTTGGAAGAAAATTTTGGCTTCTATGTTACATCTTGGTGAGTTTGAAGCCAAAGCAGTAGGCACCCCGTTAGTCTTTAAATGTTTTATCAGTCGATTAGCTCCTGGAAGTGGTTTTAAGTTGCACCACATCTACAAACAGTCAAAGAATAACCAATGGATCACATCGAGCTAGCAGTCATACAGTCAAACACATTTAACAACCCCCTCTAGGCCTCTACATATAGCATTTCAGTGTGACTTCTGGAAAAAAAATACAAGTGCATAGAAGTTCCATTGCATTACTGCTCACTGAACATCGGAGTAATCATCGAGAGGAACTCTTCTGTAGAGTAAGGGAGTCCATAGTCTTCTAAAACAACAGCTGCAGCTTCATAAGGTGTCTTCCCAACTAGCTT…
circ_000150	chr6	51906311	51906556	+	Zm00001eb267490,Zm00001eb267500	51906311-51906556,	1	exon	246	GT-AG	CTCCCCGCCCTCTCCAGCATCGACCTCAGCCGCAACCGCCTCTCGGGCCCCGTCCCGCCGCTGCTCCTAAGCAAGTACGTCGACGACCAGGCGGCGTACCTCATGCTGTCGCACAACAACCTCTCCGGCAGCATCCCCGCCGGGTTCGCCTCCGTCAGCTTCGCGTACCTGGACCTGTCGCGCAACGCCTTCGCCGGCGACGCGTCGGGCGTGTTCGGCAAGGGGAAGCCGCTGCAGCACTTGGAC
circ_000151	chr6	152051592	152051790	-	Zm00001eb286350	152051592-152051790,	1	exon	199	GA-AG	CTCGCCCCGCTCCCCTCCCACGCGCGCCGCCGCTTTCACCCTCTCCCCGACCTTTTCCTCCTCCTTCGTTGACCCGCCCTCCTACGCCGACGCCACCGGCGCCGGCGCCGGCGCCGTCTCCTCCTCCCCGTGCTCCGCCTCCTCACCCTCCTCCGCGTCGCCGAGATCCGCGCGCGTGGCGGCCTCCGAGTACTCCTTC
circ_000152	chr6	90524529	90535891	+	n/a	90524529-90524604,90524704-90524775,90524867-90524938,90525176-90525247,90525781-90525852,90535820-90535891,	6	intergenic	436	CT-AT	ATGTAATTTGAGGTCTTATATGAAAGCAAGAGTCCTCCTATTGATCCTGATAAGTTGTTTGATGTCAAATCCAGATATTTTAGCTTGGGCAAGTTTGGGGGAGTATTAGGAACCTGACCTGTAAGACCACATTTTCTCAGAGATAACACTGAAAGGTTTGCCCACGCTCCTATGACATTTAAATAAGAATGGTTGCCCGCAAGATCACCAAGCATCAGGACTTCAAGATTGCTCAGATTAGAGAAATTTTTTGGAATAGGTCCTTGAAGATTCGTCCCATATATTCGCAAGTCTGTGAGATTGGTTAAGTTCTGAATAAATGCCGGAAAAGGCCCTACAATGTAATTATCAAACATCCACAGGGACCGTAGATTCCTTAAAAGCGACAGTTCATGAGGA…
circ_000153	chr6	142383613	142383823	-	Zm00001eb283980	142383613-142383823,	1	intron	211	GT-AG	CTACCCAAAAACTACGGCTCCAACAAATTTTTCGTTGCATTCTTAATCTTTCTCTCGCCAAAACCATCACAATTGCTCTCTACTTGGTGAGAAACCTGTTGGTTCTCCAAAGCATTACACCACCGCTTCTTGTGGATATCTCGAGCCATTCCTTCTTCGTCCCATACCCATATGGTACCATCACTGACTGCTCCACAGTCCACATGCGGAC
circ_000154	chr6	64902413	64902541	+	Zm00001eb268500	64902413-64902541,	1	exon	129	GA-AG	CTTCTTTGTGGCCTAGATGACTGGTATCAGTTTTAGTATCAACAGCAGGCCGTGAGAGAGGAATTTGCTCTTGGCGTGCTCCGTTTCGCTGCACAGTTACCACATGTCCTGCCTCTTTTTGCGTGGATC
circ_000155	chr7	180083552	180084157	-	Zm00001eb329710	180083552-180083662,180083766-180083963,180084042-180084157,	3	exon	425	GT-AG	CTGCTTAATGGCACTTGTGGCTGTGTCACCATTCTGAAGACCCTTGAGATGAGGAAGTGTTGGAGAATAACCATCTACAACATCAGTGAGGGGATTCCAACGGATTGGATCCTCACCACCTTCTCCTGAATTAGATTTCCCACCTATTCTATTCATTGCAATTGCAATAGCTTCATGCGTTTCCCTTGAAATGGCTCCTAGGGACATTCCACCAGTACAAAAACGTTCAACAATGGAGGTTGCAGACTCCACTTTGCCAATAGGAATAGGTGCACGATCACTTTTCAATTCAAGAAGATCTCGAAGAACATTGACAGGACGGCTTGCAAGATGTTGTTGGTAGACAGTGTACGCATTATCACGTTTCTCACGAATTGCTTTGTGCAACAGCTTGGACAT…
circ_000156	chr7	184511291	184511492	+	Zm00001eb331870	184511291-184511492,	1	exon	202	AA-AG	CTCGCCCCTGCCCCAGCCACAGCTCCCCCTTCGGCCCTGCTGCTGCAAGCACTCAGCCCCTCCCATGGCACACGGTACTCGTCCAGCCCCTTTCTACTGGTGGCTGACCCATCTCTATGGTGCTCGACGAAATGACCATGAGGAGTTTTGTGTTGTGTGCAGCCCCATCTGCAACACCGTCGACCCCCGACGAGGTCCTGTT
circ_000157	chr7	141181318	141181456	-	n/a	141181318-141181456,	1	intergenic	139	GT-CG	CGCGAGCTTGTAGAAACATAGATGATCCATGCATGTCGTCATACTTCTTGATGATTGTATTCTTGGTGCTGAGATGAAGAGACGACTTTTTTGAAAGAGCCATATCCATGAACTTAGCAAAAGGCCTAATAAATGTGAC
circ_000158	chr7	183978341	183978598	+	Zm00001eb331630	183978341-183978598,	1	exon	258	AT-AG	CTTTCCCTTCTGGCACTTCAGAAGAGAAATTAGGGGTATCTGCAGCTCTTGCTGCCTGTTGGGCATCCATGTTTTTGGCCATTGAACCAATTAGGTCAGCAGCTCGAACAGTTGCATCCCCTAAATTTCCCATCATTGACTCCTTGGAATTGTTTTCATGATCTGCTGCTTTGATGGGTCTCTCATTTGGGGAAGATTGGTGATCCATATATAGATTTCCAGGACCATCTATCTCCAAGTCTTTTCCCTTAAAGTCAT
circ_000159	chr7	171989683	171989865	+	Zm00001eb326610	171989683-171989865,	1	exon	183	GC-AG	CTCCACCTCCAAGGTTAAATAACAATGCAATCGCTCCACCGCCACCACCTCCACCCCCATCCACCATAACACGATCAAGTGCTCCTCCTCCTCCTCCACCACCACCACCACCATCAATGTCACGTTCTGCTCATCCGCCACACCCCCCGCCACCACCATCATTGTATTCTAATGTCCCATTGC
circ_000160	chr7	164027737	164027991	+	Zm00001eb323370	164027737-164027991,	1	exon	255	GC-CA	TGGGTTGCTGGTAAACAATAGAGCCGGCGCCGGAGAAGTCGCACGCCACTCTAGCCCGGTTGTTGCGCTGGTAGTAGCCGTTGAACGCGTACGAGGCATGGGAGGCCTTGTTGTCCGGCTGGAAGCACGCTCCCCCGGGCTGGATGGCGCGGCAGTCCGCGCCATGGCCGCACGCGTAGTCCAGCGCCGTTTGCAGCCGCGCGTCCCCGACACCCGGGTTCGCCACGCACCAGCTTGCCGTCGCGGCGCAGAAGC
circ_000161	chr7	164244913	164249956	-	Zm00001eb323410,Zm00001eb323420	164244913-164244918,164249730-164249956,	2	intergenic-genetic	233	AC-TG	CAAAAAAATGTGTTTTGTGACATCTCGAGTCTGATCTTGCCCAAAGAGTCTAGCTAGGCCAAAGTCTCCAATCTTAGGGTTCATGTCTTCATCCAACAAAACATTGCTCGCTTTCATGTCACGATGTATAATCTTCTTTTGAGATTCCTCATGGAGATATTGTAATCCTCTAGCAACTCCTCCTATTATGTTGAACCGTTTCCTCCAATCTAGTCGTATTTTTTCCTCGGGGT
circ_000162	chr7	176333171	176335560	+	Zm00001eb328050	176333171-176333331,176335555-176335560,	2	exon	167	GC-AT	ATGTCACAAACACAATGCCGTACACAATCTACCAAATCCTCGTGATAGCTATTCCGGGCTTCTTTCAAACGCCTTACTTGCTCTGAGCATGATTTTTCTCGTATCTGCCTGTCAGTTTCTTCTAGTAAAGAAATGGACTGCGACTGCTGAGACATGAAATAAAATGC
circ_000163	chr7	8869103	8869192	+	Zm00001eb301060	8869103-8869192,	1	exon	90	GG-AG	CTCCCCGTCCCGCACCTCATACGCCAATACCTCCCCATCCCACGCCTCATACGCCACAGTCTCCCCAACCCATGCATCATACGCCACACC
circ_000164	chr7	95150997	95151767	+	Zm00001eb310060	95150997-95151247,95151762-95151767,	2	exon	257	TG-TG	CAGAACCTTTTTAGCTCTCCGGATGATAACAACCTGGTTATCTGATAATACAGCCCTGTAAACTGCCCAGGTTCCCCCTTCACCTAACTCAAATAAAGGTGAGAAATTATGAGTAACCTTCTGAACCTGCTTAAGGCTTAAGTTTAAAGATCCATCTCCAGGTATTAGTGCAGGCATTTTTGACTTGTCCGGACGGCGTAAAGTTGATGGGATCTCCTTGGATGGTGTGCTTACTTTAGAGGATGAAATAGTATCCA
circ_000165	chr7	53295225	53295832	-	Zm00001eb307440	53295225-53295304,53295387-53295427,53295507-53295650,53295722-53295832,	4	exon	376	CT-AG	CTGTTATTGAAGATAACAGATCGTTGCAGTCCAAATGTTCATCATCGCACAGCGAATCTAATATCTGTACACCCATATCGCTCCGGAAGTTCAACTGATGGATGCCCATAATAACAAGCATCTCATCAAGATGCATGGCAACTGCTCTAAGAACAAAACTAGCACTGACGTGATCAAGGTAAGAAATGGGACAAAGAAGCGCAGCAGAGCTTATCATCTTTACTGTTTCAGGCATTGTAAACGCAGCCAAACCCATGATAGTTCCCTGTGAATGTCCCACATACAAAATTTTGGACTGTGCAACTGTATATACATAGCTTAACATTGCCAAAACGTCGTATTCAGCAAGGTCTTGCCAACTCCAATCCCAGAAAAG
circ_000166	chr7	184928134	184928943	-	Zm00001eb332000	184928134-184928233,184928607-184928706,184928861-184928943,	3	intron	283	AA-AG	CTGGAAAAGTGGCGGTCGCGAGAGGATGCGGAGGAAGCTGCGGTGTCGTTGTCGTCGGCGGTCGCGAGAGGATGTGGAGGGCGAAGCTGTAGCGTCGCTGCTGGAAAAGTGGCGGTCGCGAGAGGATGCGGAGGAAGCTGCGGTGTCGTTGTCATCGGCGGTCGCGAGAGGATGTGGAGGGCGAAGCTGTAGCGTCGCTGCTTAGAAAGCGACGGTGGGAGGAGCCAGAAGCCGGCGACAGCAGCTATGGCGCCGTTGTTCTCCTCGTCAGCGTCGCCTCTTT
circ_000167	chr7	169357102	169357469	+	Zm00001eb325420	169357102-169357469,	1	exon	368	GC-AG	CTTCTGTCTGAGGGTCATCGACAAATTTTTCAAGGCAATCAACAAAATTTGTGCCATTGAATGGGTCACCACCAATGCCTACACAAGTTGACTGCCCCAAGCCTACAGCTGTTGTTTGAAACACCTGTCAACAAAAAATCAGACATGCATTAACCAAACAATTACCTAATTAGGTTCGCACATACAAATAATAATAATAACAGACATACCGCTTCATATGTCAAGGTACCAGAACGAGATACAATCCCAATACGCCCAGGCTTGTGGATGTAACCTGGCATGATTCCAATTTTACACTCACCAGGCTTAATGATACCAGGGCAATTTGGCCCAATCAATCGAGTTTTAGATTGTCTATTTAGTGCAGC
circ_000168	chr7	128022815	128023065	+	Zm00001eb314330	128022815-128023065,	1	exon	251	GA-AA	TTCTTCCCCTGTCGTCCACTTCCGCAGTCGCACGCAAAAGGCACAGCGCGGCGGCACACGCCATGGGCACCCTCGTCGGGCACGTCGCGCCGGGCGCCGGCTTCCTCCTCATCGGCCTGTGGCAGCTGTTCAGCCACACCCGCCTGTTCCTGCTGCGGCCGAGCTCGTACTCTGCCCCGGTCTGGTTCCCGGTGCCGGGCGTGCGGCACCTGGAGCTCATACTCATAATCATCGGCACGGTGCTGTCCATC
circ_000169	chr7	8860534	8860834	-	Zm00001eb301050	8860534-8860834,	1	exon	301	GG-AG	CTCCGCAGGCCGCATCCCTCCACGTGCACGAGTTCCGAGGCGCCCCTTCGATCCGCCCGGCCCGGCCCTCTCCACCGCGCGCGCGCGTCCGTCGCTAGCGTTTGGCCGTCTCCCTCTTGAGCCCCGAGTACCCCCACGACGCGGCAAGGAACCTCGCCATGAGGGTCCACCCGGCTCCGCGGAAGCGCACCATCGCCGTGCAGCGCTGCGCCACGGCGGCGGCGGCGGCGGCGGCGGGCGCACTCGGCGGGAAGAAGCTGCGCCGCCTGCCGCACATCTTCGCCAAGGTGCTGGAGCTCCC
circ_000170	chr7	162809971	162810126	+	Zm00001eb322940	162809971-162810126,	1	exon	156	AC-AG	CTTCTTGTGGAAGACAGGCTTGGTCTGGCCACCATATCCTGACTGCTTGCGGTCATAACGGCGCTTTCCCTGGGCAGACAGGCTATCCTTACCCTTCTTGTACTGAGTAACCTTGTGGAGAGTGTGCTTCTTGCACTCCTTGTTCTTGCAGTAGGT
circ_000171	chr7	155006225	155006612	+	Zm00001eb321400	155006225-155006271,155006381-155006612,	2	exon	279	CG-AG	CTAAATAGTGAATGCATAGGGTGTCCTGACCATCATATCTTGGAGTTTGGGTCCGAGAGAGTTGAACACAATGATATAGAGTAAGTGGCTGCAAAATTAAACCTCAGGCAATTATAGAGTTCAAAGTTATGTCCATAACATGTTGGCATGTTGCAATGTACATACCCAATGAAGTAAAACAGCAACAGGTGAATGCAGGGGAAGGGATCTCCACTGATAATATGCTTCCCAGCTGCACAAGGGCAGAGGGAGCTTTGCAAGTTCCATTCAGCTTCTACG
circ_000172	chr7	130175648	130175758	+	Zm00001eb314690	130175648-130175758,	1	exon	111	CA-TG	CACCCGAAGCCCCAGGCCATCGCCGCCGGAGCTCACTCGTTGCTGCTCACGCGTGCGTGCTTATCGTCCAAGTCGCCGCCGCCGTCTCTTGCCGTGGGGCTGCTCTCGGTG
circ_000173	chr7	180927308	180928912	-	Zm00001eb330040	180927308-180927313,180928584-180928690,180928780-180928912,	3	exon	246	CT-AG	CTGCACCATATCACAGCTCCTGCAGCTGCAACCTTTCCAAGCATGGATAAGCATTGTACCAATGTTCTCAGGTACTTCACATTAAGGGGAGCATCTGCCTTTATCATTGATTCAAGAAACTCATCTGGTGTAGCATAGGAAAGAAAAATTGGGATTTCATGAGAAAAACTTTTCGAATCCTTTCGAGTGTGTCCATCACTTTCACTCATATCTAAGCTATTATCATCTGGGCCATCAAACGAAGAG
circ_000174	chr7	128827079	128829090	-	Zm00001eb314490	128827079-128827084,128827435-128827584,128829057-128829090,	3	exon	190	GC-TG	CACTCAGTCTTGCTGTCGGTTCTTGATGAGCTCAAGGCGCAACAGGACGGGTACTACGTCGTGGTGGGCGGCATCACGCCAACGCCCCTCGGGGAGGGGAAGTCAACCACCACCGTCGGGCTGTGTCAGGCTCTCGGCGCTTTCCTTGATAAAAAGGTTGTCACTTGCCTCCGTCAACCATCACAAGGGC
circ_000175	chr7	33207045	33207714	-	Zm00001eb305460	33207045-33207180,33207709-33207714,	2	exon	142	GA-AG	CTCTCATGAAACCTAGGAGAGTTACAAACCATGACATCAAGGTAATGTTTGGGAACTTCAGGAACAGCGGTACAAGAAGAAAAATGGCTATCGGTAGACTGTGAAGAATCAGAGATATATCACGAGAATAAAATACCATATC
circ_000176	chr7	141186893	141187134	+	Zm00001eb317320	141186893-141187134,	1	intergenic-genetic	242	GG-GG	CCGCTCCCCCCATCCACCGCGACCTCAGCCGCCACGCCGACGCCATCCCCGTCCTCTAGCGCGTTGTCGCCGTCGTCACACCGCCAAAGGTGCCTGCCCCCTGCTACCGAGGTCGACGACCAGCAGCGGCAAGCTGCCGAGCTCGACGACACGCACGCCATGCTTGGCCATATGGACGAGTCCATCGCCTGCTACGAGAAGGGGCTCCAGATCCAGATGTCCGCGCTCGATGAGCGCAATCC
circ_000177	chr7	10810747	10810905	-	Zm00001eb301500,Zm00001eb301510	10810747-10810905,	1	exon	159	GT-TG	CAGTACCACCTGGACCTGTCGGGCCACCCGACGGCCGGCATCGGGGACGACATCAAGCACTGCCAGTTCGTGGGCGTGCCGGTGACGCTCTCCGTCGGCGGCTTCGGCTCCGGCTACTCGCTCCCGTCGACGCAGGCGGCGCTGGACCTGTTCGACTAC
circ_000178	chr7	8354643	8358612	+	Zm00001eb300910	8354643-8354913,8358607-8358612,	2	exon	277	GT-AG	CTGCAGCTCTGCTTTTGCGCCTGGTCTTGGGGTGGACTTTGCTGCACAATGGAGCCATCAATGACTGAAGAGCCAGAGATGTTATTTGATGAAAATGATATTGGGGACGATGGAGCAGGCATGAAGGAATAAGTATTCATGCTTGTACTTGGCTGCAACTGAGCACCTCCAGAGAATGATGAATTGGCATCTATCATCACCCTGAAGAATCTCCAATAAAGGCAGGGCACATAGCTGGAATTACCAATAAAGATCTTCCAATATTTATGACTAGAAC
circ_000179	chr8	167687169	167687296	-	Zm00001eb364280	167687169-167687296,	1	exon	128	GT-GG	CCCACCCCACTAGTTTTTGCTTCCTGTTCACTTGTGCCTGCTCTCGCTCGCTGTTGGCCTGTTGCTGTTGCTATTCCCGTCCCGTGCTTCCCTTCCTCTCACTGGTCGTCTAGTATCCTCTCTCCCAC
circ_000180	chr8	177905730	177906171	+	Zm00001eb369340	177905730-177905900,177905987-177906171,	2	exon	356	GT-AT	ATTAGCTCTGTCTCTGACTCTCTGAAGCCCGTGTGGTGCTTGAGGGTGTCGGTCCAGAGGGGAGCCCTCTTGAGAGTGAGCCTGGCTGCGTAGACAACCGAAGCAGCGACCAGCGAAGGCAGCCGCGTCACCAAGCCGTACTGCATCAGCGCCAGTTCAGCGAAGAAGAAGACCATATTCTCCATCTCTTTCTCAACTTTGTTGCCCAAGGCTGCCGCCTTCAGAAAACGAACAAGGAACATGTATACTGTAGGGACAGTGAGGTTCCACTCCAGGCTATTCAGGATTCCCTTCTCCATCGAAAGGATCTGCTCCCTGCTGTATGCACTGTCTGATATAAGAATGAAATCGTTCAC
circ_000181	chr8	115892581	115893841	-	Zm00001eb350760	115892581-115892712,115893223-115893315,115893392-115893551,115893732-115893841,	4	exon	495	CT-TG	CAGACCAAGAGCCTGTGCAGCTGTTTTTAAGTTACCAGCAGTACAAACGCTCCTGTATAGATATAGAAGGTGAACCCTCTCGGCAACATGCAAATTCTTTTCTAGTCCAGCAGCCACCATTTCCATCTCTGCAGAATTGTCCTCTGGAGGAAATATGTAATGAATTCTACAAATCTTCACGAGTTCATCCAGTGCTTCTGGCCGTTTTCCTTGAATCTCTAGAGCCCAGCATTGCAAGAAGCATGTCCGTGTACGAGTAGCAACTGATGCACATACAAGAGTGGCAGCACGAAACTTGTCTAATCCAATATTGCTAGCAAGGCCGGCGAGAAAATCCCTTGGATCCTCACCATTAAGTTTTGCTGCACCGATGTCTTTTGCTGCTCTGCTGCAATCATC…
circ_000182	chr8	177570873	177571455	+	Zm00001eb369140	177570873-177571008,177571090-177571174,177571450-177571455,	3	exon	227	GT-AT	ATTGTGGAGTGAATATTTTGGGGATCAATGTCATTAAATAAATTGCTAAAAAAGCGGAATCCATCTGGACTAACATCTCTGCACAACAGGCCTTTGTTTTCTGCATTTAGAAGATGCTCCTTTGCTAAAGCTGGAGCAATTCCCAGTGTGAATGCAGCATCACTTGGGCTAATCCCTTTCTGAAGAGCATCTGGCTTCTGTGCAAGTGATGAGATTCTTGCAAATAC
circ_000183	chr8	30075464	30075874	+	Zm00001eb339380	30075464-30075674,30075758-30075874,	2	exon	328	GA-AG	CTTATCATAACATTGAAACTCTCCAAGTTCAGACGAACTGCCTGGCTGATTTAGCTTCTCAGTTGGGCATGATGGATACCTAAGCTCACCTCCTGGGCCCATTCCAACTTGAACTTCTGTTACTATGGCCCCAAGGTAATCTTCGAAAGTATTGCGGAAGCTTCTCATGAAGTCGGAGTAAGCTTGCATAGGTGATCTTCCTTTCAGAACAGGAAGAATATCACATCCCAGTGATATGTATTCTCTGTTTCTCTTCTGGTATCTATTGGTATATGACAGGTCCGGAACCTTATCCATCTCCTCAAGAACCCATTGTGGCAAAGGAATC
circ_000184	chr8	73114960	73115112	+	Zm00001eb344070,Zm00001eb344080	73114960-73115112,	1	exon	153	GT-GG	CCCCCTTGCCATTATTTATCCCATCTCCGTCTCCGTCTCCCTCTCCCTCTCCGCAATAGCCCGTCCCCGCCGCCGGATTCGATCCCGTCTCCGGCCGACGCGACCATTTCCCGCACCGCCAGATCCTCTCGGCTCGGCCCGGCCGCCGCGCAC
circ_000185	chr8	138290020	138290287	+	Zm00001eb356090	138290020-138290121,138290124-138290287,	2	exon	266	GT-AA	TTTTCTCCTGCTTTTGGGAAGCTGAAATCTACAGAACAGCAACTAGAAGGAGACTATCGTCAACTTCACTCGCGGTTAAGAACACATGCTGAGAGTGTGGCATTTTATGGCGGTGAGAACAGAGAAGCATCTCATATTATGCAGCGGTTTGAGGCTCTTGTTGAACCTGAATCTTGTGCGTCATGAAAACTGGTGGTTCGGCATGATTCAAGATTTCTTTCTGAAGTATTTTGGTGCTACTGTGGCAGTTGTCCTTATTATAGAAC
circ_000186	chr8	116621569	116622072	-	Zm00001eb350870	116621569-116621673,116621948-116622072,	2	exon	230	GA-AT	ATGGTTGGTGAGAGATGAACTCCTTTATCTTCAAGCATTTCCATCAATTCTTCATAAATCCATTCTCGTGGAAGCCTCTCAAGAAAGTCTCGTAGTGTCCAACCTCGGTGGTTTCTCACATCAACAGCAGGTGACGGCTGTAGTAGCATTTGAGCAATCCAAGTCAAGTTTTCGCGTATCATTTTTGCTGCGTCAGCAGCTATGTGAAAAGCATTGTCACCATCATCATC
circ_000187	chr8	71409644	71409929	+	Zm00001eb343760	71409644-71409720,71409844-71409929,	2	intron	163	AC-TG	CATGGGGCTGGTTTGGACAGAGAATATCGCCTTTGCCAGTGATACGTTATGGGCAGTTTCATTTAGGATGGACAACTCCTAGAAGGCTCATATGGGAAACAACCAGCTGGTATAGCTGTAGACGCTGGCAATGGAGGGAGCGACACAGCAGCAACGCGTGAGT
circ_000188	chr8	12720881	12721074	+	Zm00001eb335210	12720881-12721074,	1	exon	194	GT-CG	CGACACCTTCCTCGGCATGTGCGGCCCCAAGTGCTAGCTAGAGAGGAAGAACGCGCGCTGCTGCTAGCTGCTATAGCTTCGTTCTTCCGCCGCCGGCCGGCCGCCGGCCGGTGCATGGTTCACGTACTGTGTGTTGTGCTACTACGTACTGGCTTCTTGTGTGTTCGGTTCTTGTTGTTCTCTCGACAGTGCAC
circ_000189	chr8	168773186	168773835	+	Zm00001eb364810	168773186-168773345,168773616-168773835,	2	exon	380	AT-AG	CTTGTGCAGTGATTGCAGTATCCCCAAGGCTGGACAAGACCAACTCCCCATCCACCACAGCCCAAACATCTCTGCATTTGAGAGTTCCAAATATCTGCAGCTTGAGCGACTGGCTCAACTGCAGTGTTGGTGGAAGCTGGAGGTCTAACACTGGTGTTCACAGAAGTAGGAGGTTCCCATTGTGTGGTCTGTGTCTTCGTGTTATAATAGTATTTGTGGCCTGTTGATTTGTCAATTGCCTCCTCCCAGTTCTCTGGCAAGGATGGAGAAACTTGATGTTGCATGATATTCACAACACTGTCAGGGCGATCCCATTGACTCACTCCAGTGCTTTGATTGTAGAAGTATGGCGCTCCAGTTGTCGGGTCCTTCACTTCAAT
circ_000190	chr8	172892429	172892688	-	Zm00001eb366640	172892429-172892585,172892590-172892688,	2	exon	256	GG-AG	CTCGCCCCGTTTCTTCCTCGAACAGATTCTCTGCCCCACCCCGATTCTACCTATAAATCACAACTGCACACCCCCGAATCCCGGCAAAACCCAACGGCCGAAGCTAAGCTCGAGCCGCCGCCGCGATGATCCTCCGTATCCGCAGCCGCGACGGCACCGCATCACGGTCCCAGACTCGGCCTCAGTCACCGTCGCCGACCTGCAGCGCCTCATCGAGTCGCACCTCACCGTGCCCGTCCCGCTCCAGCGCCTCTCC
circ_000191	chr8	145368525	145368645	+	n/a	145368525-145368645,	1	intergenic	121	GT-AG	CTAAAACATAGTACCTATTTTACTTTTAACCCCTTCCATATGAAACCGTTGGATCTAGATTGGATGCTCTGGATAGTTTGATTGCACGCTTGCACCAAAATGAGTGATTGCACAGGTCCAC
circ_000192	chr8	85499397	85501087	+	Zm00001eb346150	85499397-85499402,85500975-85501087,	2	exon	119	GT-CC	GGCGACTTCATCCCCGTGCTCCGCCCCTTCCTCCGCGGCTACCTCAACCGCTGCCACGACCTCAAGACGCGCCGCATGAAGGTCTTCGAGGACAACTTCGTACAGGAGCGCAACCCTAC
circ_000193	chr8	153102591	153103343	+	n/a	153102591-153102720,153102803-153102905,153103338-153103343,	3	intergenic	239	AT-AG	CTCAGACTCCCGGTGGCCTTTTCTCCCTTGAAAATTTTTCCAAACCATCCCAGTTTCCAACTGTGGCTAAAGCGCACGTTTTAAGCCAGTACCACCTCTTATCAGGAACCTTGAATTCGGACTTCACTCTGAGTGCAGCACGCTCGTTTCCCATTGCAATACAGGTTTTTATTGTATCACTAACACTAGAACCCACAAATATTGGCTGCTTTGTGGAAACTTCAAGTTCATGCTGTGAT
circ_000194	chr8	167687164	167687296	-	Zm00001eb364280	167687164-167687296,	1	exon	133	GT-GG	CCCACCCCACCCCACTAGTTTTTGCTTCCTGTTCACTTGTGCCTGCTCTCGCTCGCTGTTGGCCTGTTGCTGTTGCTATTCCCGTCCCGTGCTTCCCTTCCTCTCACTGGTCGTCTAGTATCCTCTCTCCCAC
circ_000195	chr9	123917342	123917712	-	Zm00001eb392050	123917342-123917712,	1	exon	371	GA-CT	AGCAAATGACACAAAAACACTAGGGGCACAACCGCGGAGGCGCGGACACAAGTACATGGGACCAAACTATTGTAATTTGACAAGTAAAATTAAGTCCAACACTACATGCAAGATGCAGCAACCACAGCTTATTGAATTCAAAGAATAAAATAAGCACAAGAGAACTTAATCGCAGTCAACAGCTCATGTATCATCACAAATCTCTACAAGATCCAGACAACCATCACCTCATAACTTTATTAATGCAAATGGATTGGAGCTTATATCTTCTCGAGGGCCTGAACAAGATCATTCTTAAGGTCCTCAAAATCCTCCACTCCAATGCTGAACCTGATCAGGTTGTCCTTGATCCCATAGATGTCCCTCTGCTC
circ_000196	chr9	73157158	73157332	-	Zm00001eb383960	73157158-73157332,	1	exon	175	GA-AG	CTCTCTCTCCCTCGCGTCTTGTCCCCCCGCGCGCATCTTCCCCCAGCTCGGACCACGCCCTAGTTCCCGCTCCCTCCTGCTCAGCTCTCCAGCACGCGCCCTGCTTCCTCCTCGCCGGCCACCAAGAAGCTCTCTCCGCTGCAGCACCATGCGCGTAGCGGCGTAGGACGTTCTC
circ_000197	chr9	7222506	7222676	+	Zm00001eb372660	7222506-7222676,	1	exon	171	GA-AG	CTCCTCCACCACCTCTCCTTTCTCGTACTCATCATATTCATACCCCTACTCCTCTGTTCTGCCTCAAGATTCGTACTACCTCCCCGCCACATCCTCTTACACCGCGCTCCCGCCACCACCTCTTGCTCCCACCGCCACCTCCTTCTCACAGCTCCCGCCTCTGCCCCAGTC
circ_000198	chr9	144225443	144225765	-	Zm00001eb397090	144225443-144225765,	1	intron	323	GA-AG	CTCCGGGAAGCGGAGCACGATGAAGAAGAGAGAGGGGCCGTCGAGTCTGGCCGCATAGGAGGCGGCGAAGTCAGTGGTATTGAAGCTGGTGCCCTCGAGCGCGCTGCAGAGGAGGTCAAAGGTGAAGAGGAGGGTCAGAGAGATGAAGAGCACATAGTGGCCGGCGCCCTCCTGCACCTCCAGGTACGACGTGACAGCCGCCATGGAGGCGCCGAGCGCGAAGGCGCACAACACCCACAGGAACGTCACCACGGCGTCCGAGGCTGCCACGCGAACCGCCGATTCCATCGCCATCCGCTACTGCGCCGGCGTCAGCCTTATTC
circ_000199	chr9	39351112	39351317	+	n/a	39351112-39351317,	1	intergenic	206	CT-AG	CTTTTTTGCAGACAATCCACATTAGATAATCACTCATAAGCATTATGGTTCCGGTAAGGTATATGTTGTCCATCAGAAGATAAAGCACCAATAACATCAGCCAAAGCAGAAAGAGATTTATTTATACCTTGCGCTTCTTTCAATTGCTTTCCTGCTGAACCAGATTTTTTCACCCTCTCAGAACCAGCAAGGTCCACAAAACTTAG
circ_000200	chr9	30980778	30981004	+	Zm00001eb379580	30980778-30981004,	1	intron	227	GA-GG	CCCCACCACCCCATCTAAATTAAGGCCACAACTGTCTAATATCTTTTGCTCCTGCCATTCTCCAAAGCTTAACATCCTCATGAATCTCTTGCAAAATGTTGCGGATACTCGGGGGTACCCCATCAAACACGCAAGCATTCCTTTGTTTCCACAACCGCCAAGACACCAAGATAACTAGGGAATTAAACCCCTTTCTCTTACTATTTGGCACTTTCTGCTCAGCCTTC
circ_000201	chr9	32131690	32131824	-	Zm00001eb379660	32131690-32131824,	1	exon	135	GT-TG	CACCCCTTCACAGATCTGCTAAAACGCCCACCAAGGATGCCACTGCAATTGCTACCCCCAAATCCACACCCTTGCCAAACAACCCCAAAGACTCAACAAAAAAGCCCTCCAGAGTTAGGAACACAAGTGTTTCAC
circ_000202	chr9	7222558	7222680	+	Zm00001eb372660	7222558-7222680,	1	exon	123	GT-AG	CTACCTCCTCCACCACCTCTCCTTTCTCGTACTCATCATATTCATACCCCTACTCCTCTGTTCTGCCTCAAGATTCGTACTACCTCCCCGCCACATCCTCTTACACCGCGCTCCCGCCACCAC
circ_000203	chr9	161143215	161144992	-	Zm00001eb404270	161143215-161143271,161143376-161143556,161144987-161144992,	3	exon	244	AA-AG	CTTTGAGGCATCCAGAACCATCAGCACAAGATCTGATGACTTTGCAACAGCAATAACCTGCCTACCACGCCCCTTGCCTTCAGAAGCTCCTTCAATGATACCAGGAAGATCAAGAAGCTGGATTTTGGTATCATTGTAATGAACAATTCCAGGAATGCAAGTAAGCGTTGTGAACTCATATGATGCAGCTTCAGAATGTGTCCCAGTCAACATCGTTAAAAGAGTTGACTTTCCAACAGATATT
circ_000204	chr9	146093553	146093644	+	Zm00001eb397790,Zm00001eb397800	146093553-146093644,	1	exon	92	GT-AG	CTCCTCCGCCCCTCCTCGCCCTCCGCCCTCGCTCCCCCACGCCGACGCCGACACCTATCCTCACCGTATCCGCGGTCGCAAATGGCGCTAAC
circ_000205	chr9	38824812	38825412	+	Zm00001eb380580	38824812-38824888,38825060-38825143,38825301-38825412,	3	exon	273	GT-AG	CTTTTCATCAGAATCAGGCATGACACCAAGTAATCTGGGTGTAAAAGTTTTTTGACATTCTTCGGTGGGTTCGGTTTCATCTTCTTGTTGTGATAATGAGCGAGCAATGTACTTGCATTTTGGATGTCGATCACAGCCTATAAAATAGCCTTCACCATACCTACTAACTTTGAATCTCAAGGTTCCTTCAGAACAACTAGGGCAAATTCTATTGTCTGTGTCAACATTAGGGAAGAGGATAGGACCAAATTTTTCTTCGAGCATTCTCTCTAC
circ_000206	chr9	7222571	7222676	+	Zm00001eb372660	7222571-7222676,	1	exon	106	CG-AG	CTCCTCCACCACCTCTCCTTTCTCGTACTCATCATATTCATACCCCTACTCCTCTGTTCTGCCTCAAGATTCGTACTACCTCCCCGCCACATCCTCTTACACCGCG
circ_000207	chr10	120239480	120240819	-	Zm00001eb422710	120239480-120239648,120240128-120240247,120240748-120240819,	3	exon	361	GT-GC	GCTGGCCATCTCCTTCTCCACGATGACGCTCTTCACGGGGATCACGCCGCTGTACGGGAGCAGCCTGCAGTACGCGGGGCCGGCGCCGCTCGTCTGGGGCTGGGTCGTCGTCTCCTTCTTCACCTGCTTCGTCGGCGTCGCCATGGCCGAGATCTGCTCCTCCTTCCCGACCACTGGTTCTCTGTATTTCTGGGCTGCACATTTGGCAGGTCCAGTCTGGGGTCCGTTGGCGTCTTGGTGCTGCGCTTGGCTGGAGGCCATCGGCCTCATTGCCGGGATTGGCACACAGGCATACGCAGGATCCCAGGTACTGCAGAGCATCATCCTGCTCTGCACCGGCACCAACATGGGCGGTGGCTAC
circ_000208	chr10	1072934	1073213	+	Zm00001eb404990	1072934-1073213,	1	exon	280	GA-AG	CTTTAAGGATTGCTTGTCTCTTGGCATTGTATGCAGTATGAAACAATTTTTCTTTCAGCCCACCAGACTCCTTCACAGCATTTGTAATCCTACAGATCGAATAAGCAACTAGTATTGTTAGCATTATGAACAGATCATATCACTTCAAGAATTTATACCAAACATAGAAGTTATTGATACAGTTTTATTACGCAGTATAAATTCTGTTATATAACCGGGGAACACTTGCGAATATTGTCGGTCTCAAAGCAGCCAGATCATCCATGAGCTTCAAATTATC
circ_000209	chr10	111493123	111493338	-	Zm00001eb421010	111493123-111493338,	1	exon	216	GT-GG	CCCCAGCAGCTCCCATCCCTCCACCAGGCACTACATCAAGTGATGGAGCTCAGAACTACCCCCCCGGTGTAACACCACCAAGTTCTGGTACACCCACTCACCCTGTTGCAACATCAGTATATGCATCATCTGGCGCACCAAATGCACCATTGATGTACCCTCCACCACCTTATAGTTATTCCCCATACTATCCTCCTCCACCATTTCAGCCACCAC
circ_000210	chr10	34814299	34814630	-	Zm00001eb411380	34814299-34814304,34814436-34814470,34814549-34814630,	3	exon	123	GT-TG	CAAACTTTAACGGGCCTGACGGGAAGCCCATTGGTCCTCCTATGGGAAATCCATGGATCTACATGTACCCTGAGGGCTTGAAGGATCTCCTTATGATAATGAAGAACAAATACGGAAACCCAC
circ_000211	chr10	125740856	125741053	+	Zm00001eb424310	125740856-125741053,	1	exon	198	GG-GG	CCATTTCCTCGTGCCCTGGCTGCAGAAGCCCTTCATCTTCGACATCCGCACGCGCCCGCACAACTTCTCCTCCAACTCGGGGACCAAGGACCTGCAGATGGTCAACCTCACGCTCCGTCTCCTCTCCCGCCCCGACGTCCAGCACCTCCCCACCATCTTCACCTCCCTCGGACTCGAGTACGACGACAAAGTGCTCCC
circ_000212	chr10	103092936	103093275	+	Zm00001eb419780	103092936-103093092,103093187-103093275,	2	exon	246	GA-AG	CTGTACTATCCTGAAAATGGCAGATAAAAGTTGAACAAATCCTTCAGATGAAAGACTCCGCAACTTATTTGCCAAGGACTGGCCTCCAGCGTCAGCATCGGTAGCTCTGCCTCCAGTTACTGAATCAGAATCTATTGGTCTGGCAGTTAAAACAGGGAGTAATTCCGCTACTGTTGCTTTGATTGAAGCTTTCATAACAGTTATAAGTGTATCCCGGTAAATTCTGAGAACTGCAGGAAATTTGTC
circ_000213	chr10	132791468	132791652	+	Zm00001eb426420	132791468-132791652,	1	intron	185	GA-AG	CTGCTTCCACGTCCCAACCTTCCTTTTTCCCCCTCTGCTGTCACCTGCTATTCTATCCATGACTATATCGCCATGAGCTCTCTCAACATCCCTGTATCACTACCATGCTATCATCGTCAAAGTCAAATGTTCCCATTGTTAGAGCCATGCGCTTTTGTTATCTTGATGTGTAACAGTCGTGCTTC
circ_000214	chr10	147854348	147854624	+	n/a	147854348-147854624,	1	intergenic	277	CA-TG	CAGCGGTAGGTCCTCGCCGGCGACATGTCGAAGAAGCAGCCTCCTCGCGACATGTCCAAGAAGCCGGCCGCCGCCGGCGGCGGCGGCGGCGGCAGCGAGGACCTCAAGAAGACCGACCTCTCCGGCGACGACCCTGCCGCCGGCGAGATCCCCGAGAAGCAGCCGCCTGGCAACGGAGGCGACAAAATGGAGGAGGCCGCCAAGGGCACCAAGAAGCCGGAAGCCGCCGCCGGCGAGGACCCGAAGAACCAGCCGCTCGGCGACGTTCGTGAGGATG
circ_000215	chr10	134664364	134664635	+	Zm00001eb427030	134664364-134664432,134664553-134664635,	2	exon	152	GT-AG	CTTCAGAACAGATATGTTAAACTTGTCAGCAACATCCACCTGGTAGATTCAGCAAGTCAATGTTTGTCAATACTTTATAGACCCATGATGTCTCTCCACCAGGGGTCACTGTTAAATCTGGCACGGATGTAGTACTCGAGGGCTTCTGATAC
circ_000216	chr10	9197754	9198291	+	Zm00001eb407790	9197754-9197834,9197926-9197964,9198196-9198291,	3	exon	216	CT-AT	ATCACCAAAGATGTCACCAAATGGGTTACCCCGAGGAAAACCCGGCCCTCCAGGGTCACCACCTGACGCTTGACGCTCGTATGCTTCTGGTCCAAGCTGATCATATATTTCACGCTTGTCATTGTCCTTCAAAACCTCATAGGCACGGTTAACTTCTTGAAATGTTTTTTCTGCATCAGCATCTTTATTAGTATCAGGATGGAACTTCTTTGCGAG
circ_000217	chr10	103123214	103123931	+	Zm00001eb419780	103123214-103123293,103123418-103123579,103123864-103123931,	3	exon	310	AT-AG	CTGAATATTGTTTGCACCTCAACCTCAAGCAGTGTTTGAGAAAGGATACGGTGCAAATAGGTAACTTCCTTTGTAACAGCTTTAGCAAATTGACTCGGCTGCACATCATTATCCTGTGGGGCATTCCAGCCTTCCACAATTTGGGGTAATTTTCTAAGATTTGCAAGCAGCCTCTCTCTCATGATCTGGACAAGTTTACTGTGAATCTCATCGCGATGGATCTTGTAGTCCTGAGCCACTCTATCCAGCTCAGACATTAGCAACTGTTTGCGTGCTTCAGGTATTTTCAGGAAAAGCACTCGTCTGATAT
circ_000218	chr10	58279349	58282501	+	Zm00001eb413080	58279349-58279354,58282401-58282501,	2	exon	107	AA-AA	TTTGCTTCGCAGTTTGGGTTGCAGGAGTGGCAGATTCTACTAGCGTAGTTGGCCTTGTGCATCGCATCAACAAAAACCAAGTCATATCCATCTCCGTCTCCCATCTT
circ_000219	chr10	5029971	5030294	-	Zm00001eb406730	5029971-5030294,	1	intron	324	GT-GG	CCACCAGCAGGTATTCCCACCCACGTCTCCCCTTCCTGTTGTGTGAAACCGAGCATCCAAACCCTAACCTTGTTTTGCTATTTGATGCAATGATGCCTACTAGGCTACTAATACTTCAAGCCTTTTTGGCAAAAAAAAAAAAATCAAAAAAATCGGGTGTAGAACTGTAGATACGCATCTCCATCTCCCTTTACTGGGTCCACCCCTCGGCCATATCCTTGTCTCCCGTGGCCACACCTGCTAGTTTTGCATTGATTATCTCCTAATAATCCGGTAGATATCTGATATTTCCGTGACGTATTTGATAACATCTCTTCAAAGCAC
circ_000220	chr10	76222747	76222933	+	n/a	76222747-76222933,	1	intergenic	187	GG-AG	CTCGCCCGACCCATGGCGCGCGCCCGAGCTGCCCGCGTCCCCTCAAAATCCACTCCGGATCCTCTCCCTTCCCCACAGTGCGCGTCGGCATCTGACTGTGCTTTCCCAAATTTGGAGATCTTCCATCGTCGCCGGAGCGTGCAACCTCAATCTTCACCACATCGCGGCGATTGCGGACGCGCGCGCC
circ_000221	chr10	81059429	81059728	+	Zm00001eb416050	81059429-81059728,	1	exon	300	TC-AG	CTGTAGCTTGGAGAAGTCTGGCTGTATGGACTCATCCTGGGGCTGCTTGGAGAGTATGCATGTGAAGGGCTGTACTTGGCTGATGAAGGATTGTAGCTCGGAGATGTAGGACTGTAGCTCGGAGATGTAGGGCTGTAGCTCGGTGACGTTGGGCTGTATCCTGGTGATGTCGGGCTGTAAGCAGGTGATGTCGGGCTGTAGGAGGGAGAGGTAGGGCTGTATGAGGGGGAGGTAGGGCTGTATGAAGGGGACGTAGGGCTGTATGAAGGTGATGTAGGGCTATAAGATGGTGAAGTTGGA
circ_000222	chr10	127497038	127497229	-	Zm00001eb424770	127497038-127497229,	1	exon	192	GT-AG	CTCGCCGCCTCCTCCCTCTGCCGCGTGCGGGGCCTGATCGCGCTGAGCCTCGCGTCCAACGGCTTCAACCAGACCATCCCGCTGGAGCTGTCGCGCTGCGCCTCGCTCGCGTCGCTCAACCTCAGCGCCGGCGCCTTCTGGGGCCCGCTCCCCGAGCAGCTGGCCATGCTCACCTCGCTCGTGTCGCTCGAC
circ_000223	chr10	125740699	125740908	+	Zm00001eb424310	125740699-125740908,	1	exon	210	GT-AG	CTCCCCACCATCTTCACCTCCCTCGGACTCGAGTACGACGACAAAGTGCTCCCCTCCATCGGCAACGAGGTGCTCAAGGCCGTCGTCGCCCAGTTCAATGCCGACCAGCTCCTCACCGACCGCCCCCACGTCTCCGCCCTCGTCCGCGACGCTCTCATCCGCCGCGCCCGCGAGTTCAACATCATCCTCGACGACGTCGCCATCACCCAC
circ_000224	chr1	117730154	117730792	+	Zm00001eb026200	117730154-117730285,117730456-117730524,117730615-117730792,	3	exon	379	AT-AG	CTTTGCAGTAGGAGAGCAATATCTGCAGCCTCTTGTTTTTTTGTTTGCTTCTGTAGTCCATATATTTGGCAAGAAACAACATAAGTAAATTTTATATCTGCTTGGGCCCGTGCATCAGGAGATAACTCATAGCCTTGAGTGTCAATATATTCTGCTGCAGAATTTCCATCTTCAATACCCCCAAGGCATCTCCTCTCCAGGTAACTTTGTAACATCAAAGCTCTTCTATAGTACATCATTCCACGCACTGTCCTGGCCAAAGTTTGGCCACGATAAGATACCCAAAACCGGAGTTCCATGGTGTCACTTGGACTTTCTTTAAAATCATCTTCTGATGATTCACCACAGCCAATTCGTTCTAAGAAGTTAGCCCACTCAT
circ_000225	chr1	254421158	254421767	-	Zm00001eb049810	254421158-254421337,254421651-254421767,	2	exon	297	GA-AG	CTCGAGTTCATAAGCTTGAGTTTTTTCTCTATCATCTTGGCGATCAGGACCTTCCTCCTGATATTCACCGTTTTCTTCTCTGAAATTCTTTTCAAGAATCACAAGCATTTTCCCACCTTCTTCTGGAATATAGCCAAAAGATGCACAGACAAAACCAGACACCGTCTCATACTGATGTCCCTCTGGTATTTTGATACCAAGCTCTTCAGATAGGTGATCTATCGATGTGTTTGCATCAACATCAAATGTTCCATCCCCCCGCCTTACTATATAGCCTGTTTTCTTCTGGATTTCCTC
circ_000226	chr1	304115707	304116070	+	Zm00001eb064150	304115707-304115829,304115948-304116070,	2	intergenic-genetic	246	TC-GG	CCCTTTGTGTGTGACACATTCAATATACGATCTTATTTACTTGTGGGTTCCTCCACAATATTCACATCCTCATGAGGGAATGTAGCATATTTGTCTCCTGGCGAAATCAAAAGGTTTTTATGACCGTCTATATGTGACACATTCAATATATGATCTTCTTTGATTGTGGGTTCCTCCTCAATATTCACATCCTCACGAAGGGATGTACCATGTTTGTCTCCTGGCGAAATCAAAAGGTTTTCATGA
circ_000227	chr1	242929597	242931839	+	Zm00001eb047240	242929597-242929672,242931639-242931715,242931790-242931839,	3	exon	203	TG-CT	AGGTTCCTTTTCTCATCTGAAGCCATACCTTGGAGGCACCTAATGACAAGCTTTTCATTCATCTCAAACCCAAGGAAATTTGAACTTTCACAACTTTTAGCCATTTGAAAAAGAAACAAACCATTTCCACTTCCGATATCAACCACTAAGGGTAGTGTAGGTTCACAGAAGACAGTACTCCATGGAATCCGGTAGGGGTAACA
circ_000228	chr1	53904384	53909260	+	Zm00001eb015660	53904384-53904698,53908921-53908990,53909099-53909260,	3	exon	547	GT-AG	CTCAAGAAGCTCAGAACCCCATGGGGGACTTGTATGTAGAGTATGGCGATCATACTCAACAAAAAAGTCCCTTATCCTTTCATTAATTGGGAACAATGAAGAGCAGAGCCTTAAACGTAACCTGAAAACAGTTTTCCCATCTTCCAGATAGTCCATTCTCTCCTTTCCACTTTCCTGCAGGTAATGTGGAACGAGCTCTCTCAAAATCGGCAAGGACACATCTGAAAGTAACTTGGAGGGAGTCCTCTATATAGCTTTCCTTCACTTTGTTTAGGTTTGATATCTCTACAATAACTGAGCTTCCACTTGAGTAATGGTTGACTTTTCCATCTAAAGCAAGCTTCGAAATAGGGTCCACAATACTATCTTGAGAACTTGATCCTGATAAACTCGGTGCTA…
circ_000229	chr1	22122437	22122838	-	Zm00001eb007570	22122437-22122546,22122648-22122838,	2	exon	301	CT-TC	GAAGATCATCCCTTCATCATCATCTTCATCCTCATCAATTTCATCTCCTTCTGGCAATGGAGCACTTGTAAGATGGTGTGTTCCCTCGTCAGTGAAATCTGTGTCTTCCTATTCCATCCACTTTCTCCTGATTGATCGATGCAACATTTCCCTCACTGTTGTTGGTATCACCGATTTGGTTTTGACTTGTTTTCTCAGTTTCTCCTCCATTACTGCTCTCAACTTGCTTGCCCTTGGCATCATGCTTAGCTCTGTCACTCCTGATTTGTTCTGCCAATTCTTCAAGCTTTCTAGCTTTGAG
circ_000230	chr1	245161787	245176167	+	Zm00001eb047740	245161787-245161990,245162071-245162243,245162892-245162988,245176014-245176167,	4	exon	628	GC-TG	CAGGGATGGGGACCACATCTTCTCCTTGATGAAGAACCCAGGAGAGAGCGAGTTGAGCAGGTGTGCACCCATACTTCTTGGACAACATTTCAAGTCGTGTATACAGAACTTTATTCTTCTCCAAGTTTTCCCCAGAATATCTTGGATGTTTAGACAATAGACTTTCTGATGGAACACGTTCTACAGCTGCCCTGCCAGCAAAGAAGCCACGGCCAAGTGGGCTATATGGAACTATTCCAATACCAAGCTCCCTGCAGACTGGAATTATATCTTCCTCTATATCTCTGGTCCATAGTGACCACTCCAACTGCACCGCAGTAATTGGATGGACAGCATGTGCCCGTCGAATGGTATCGGCACTAGCCTCTGATAAGCCAACATACCTCACTTTCCCTTCTT…
circ_000231	chr1	83209410	83210344	+	Zm00001eb021820	83209410-83210183,83210297-83210344,	2	exon	822	GT-AG	CTGTAATAGTTTGCCTCCAGCAACAAAAGATCGCAATCCCATAGTGTCCTTGTTTCTGAAAGTGACTAAAAACTGAGCAGCAGGATCCCTCTTTGTGGCATTTGGTATCACATCAAGATACCATCCACCGCCAGTGACCCTCTCTCTTGAAACATAAAAACCTGAATTGTCTCTTGTCTTTAGAGCAATAACAAAACCTTCTTTTAGCTTTTCAGGAGGCCTTCTACCAAGCCCTACAGGCAACTTATTTTCAGAAATTATCTCCATTGGAGACTCAACAGAAGACTTCTGTTTATTTTTTGAGTCCTCAGGCGATGCAAATCGTGAACTAGAACTTAACACTTGGTTATCATCGTCTCTGCGTGAAGAATAGTTACTTCCACCTTCTACAGTTGACAA…
circ_000232	chr1	681573	681724	-	Zm00001eb000190	681573-681724,	1	exon	152	AG-AG	CTCGCACGTTCTCGTCAGCCCCGCAAGATTTGGTATGCGTTCCACCAATGACGCAACCACGATCAGTTCTTGCCGGCTCTGCTTGATCGTTTCCGCAGCATGCAATCTTGCTTCTAGCGCTAGGTCGAAAACTTGGTCATCTTCCTCCATCT
circ_000233	chr1	306123011	306123103	+	Zm00001eb064850	306123011-306123103,	1	exon	93	TG-TG	CACCGGCAGAGGATCTGAATGGGAAGCATGAGCCCAAGTCCCCCAAAGCTGCTCCTCGTTCACCAAAGGCCGCTACTCATCCCACCTTTGCCA
circ_000234	chr1	2925488	2925682	-	Zm00001eb000770	2925488-2925682,	1	exon	195	GG-GG	CCCACCAACCCGACGCCGCTCACCACCACAGTCGTCACCGTCCTCCGCGTCCGGCGCCTCGGCCCGCACCAGATCCGCCGCCCCGTGGCGCTCCCCTCCGTCGAGTCGGAGGTCGCCGCCTCGTCCGCCCAGGACCGCGCCAAGGACATCCTCGTCGTCGTCTCCGGCCTCCTCTTCGGCTTCGGCTGCGGCGCC
circ_000235	chr1	117716365	117730792	+	Zm00001eb026200,Zm00001eb026210	117716365-117716462,117730456-117730524,117730615-117730792,	3	exon	345	GA-AG	CTTTGCAGTAGGAGAGCAATATCTGCAGCCTCTTGTTTTTTTGTTTGCTTCTGTAGTCCATATATTTGGCAAGAAACAACATAAGTAAATTTTATATCTGCTTGGGCCCGTGCATCAGGAGATAACTCATAGCCTTGAGTGTCAATATATTCTGCTGCAGAATTTCCATCTTCAATACCCCCAAGGCATCTCCTCTCCAGGTAACTTTGTAACATCAAAGCTCTTCTATAGTACATCATTCCACGCACTGTTGCTGATATAGTCCTCTTCACGCAAGCTCTTGATAATTTCATTCCAAAATGGGGAAAATATTGAGGCATACGTCTTAGTTGTAATTTCTGATTC
circ_000236	chr1	65382551	65384855	-	Zm00001eb018350	65382551-65382623,65382770-65382828,65384850-65384855,	3	exon	138	AT-AG	CTGCTTTATCAAGCAATCTAAATCCTAATAACCATGACGCTTTCCATAGTGAAGAGAACTATGACCAGATAACCCACTATTAGAGGAGCGAGCACTGTACCCGCTGTAAGCCCCATATCCTCTTCCAGGTGCCATTAT
circ_000237	chr1	10672966	10673285	+	Zm00001eb003860	10672966-10673285,	1	exon	320	GC-AG	CTCCTCGTCACCTACTACAACGAGACGGCAAGCGCGTCCTTCCTGTGCAGCCACCTCCTCAGGGACATCGAGCAGATCCGCCTCCGGTACCGCCCGCTCAAGACCACGCTCCGCAAGCTCGCCTGCGACGTCGAGGCGCCCAACCTCTCCGACGTCTCCGCCGCCCTCGGCCAGCCCTTCGCCGCGCTGGCCGTGTCGCAGGGCAAGCTCCGGCAGGTGCAGCTCAGCTCCGCCGACCTGCTTAGGAGCCTTGACGCCAGCAGGAAGAAGGCGCGGCTCCGGATCAGTAGCCTCGCCCGGCTCAGGCAGCTGCTCTCGGC
circ_000238	chr1	7668433	7668517	+	Zm00001eb002760	7668433-7668517,	1	exon	85	GT-TG	CACAGCACAAACGCAACGCGACGCACCAAGCTCTGAGAGTCGCAATGGAGAGATCAGCTGAGAGCTGGTGGGTGCTTCCCATGAC
circ_000239	chr1	184923994	184924466	-	Zm00001eb033230	184923994-184924171,184924461-184924466,	2	exon	184	CG-AG	CTTCATCATTGCTGCTTGGTTTAGCTTCCATATCCTGCTTCTGTGATTGCTGCTGCCTGTACTTCGCCATGATAGCTTCTTTCCTCCTCCTTGCTTCCTCTTTGATTTTTTCAGGGTCCTCTTCCTCCTGCATTGCTAACTGCTGTTCTATTTTCTCTTGGTACTTCTCTTCATCTTCGTTTCG
circ_000240	chr1	152177727	152178839	+	Zm00001eb028570	152177727-152177814,152178565-152178655,152178769-152178839,	3	exon	250	TC-TC	GACGCCAGGCTCCAAGGGCTTGTCCTTGGGGAGTGTCATGGAGTCATGAATATCCATGCCTAACGAGTGGCCTATTGCGGTTGGGTTCAAGTAGTTGTATTGGATGGATTTCCCCTTCTCCAGGATCCTCAGTTCTTGGAATCCCTTTATCAACAGCTTTACCTCTCATTTTGCACTCGTATTCAATCTTAGCTGCCAACTGGCTTTCCTCTCTGTGGGTCCTCGACATCAACATTGTTTGTAAAAGAGA
circ_000241	chr1	279218028	279225986	-	Zm00001eb056130	279218028-279218033,279225227-279225312,279225748-279225828,279225927-279225986,	4	exon	233	GT-AT	ATCCTCCGAAAAAAGAATGTTTGTTTTGTCCTGGTAGACAGCATTCATTGCTGGAGTTGATTCAACCTCTTTTGCCACTGAACAGCTTTCTCCTGTAAGAATTGCTTGATCAACACGCAATTGGTGGCTTAACATTTCAACCATTCTCATGTCAGCCGGAACTTTGCAACCAACTCCTACTTCAACTATATCTCCTGGGACAAGTTCTGTTGCTGGAAGTATAGAAAAGCAAC
circ_000242	chr1	60586078	60587208	+	Zm00001eb017000	60586078-60586278,60587077-60587208,	2	exon	333	GT-AG	CTTTTTGCTTGTTTTATCTTGATCTACAGCTTCTGCAGTAGCAGTAGCATCATCCAAGTCTTCAAGCGTCAAATCTCCTTCTTTGTCAACCTTGATGCTCTTTGCTCGTCTTTTCTTTTGTCGATCCTTCGCCTGCATGGATATTTCTTTCAACTTATGTGCAATTTGTGTGTCATCAATAAGTAATGAAACAACATCCTCTTGTCTCAACAAATGATCGTCCTGAACATGTTTCCCCTTCATAACCAACTCTTGCACTGCATTTTTCTGCTTTGCTCTTTGCAATATTTTCTCCTCGATAGTATCTTTGCATATAAGCCTGTACACAGTTAC
circ_000243	chr1	27924250	27924490	+	Zm00001eb009090	27924250-27924490,	1	exon	241	GT-AG	CTCGTCAACCTCGACCTGAGTGACTGCACCGACAGGATCATCGCCGAGTACATCTGGTTGGCATCCCTCTGATCTTGCTCTGGTTTTTTTCCCTTTCAGAATCGCCTTTGCATCCAAACTAGTACATCACTTGCAAAGTTGCACTCGACGGTCGCCCGTGTCGCCCGAAGCTAGCATCGTCCGCACCGCACCTCTCTGATGTCGCCTCTTCCTGTGCAGGATTGGAGGAACCGGCATAGAC
circ_000244	chr1	115182179	115182484	+	Zm00001eb026010	115182179-115182484,	1	exon	306	CT-AG	CTGTCCGAGAACCGCTTCGGTGGCGCGATCCCGCCGGCGCTGTCACGCTGCTCGGGGCTCAGGACGCTCAACTTGTCGTACAACGGCCTCACCGGGCCGATACTGGAGTCGGTGGCTGGAATCGCCGGCCTTGAGGTGTTCGACGTCTCGTCGAACCACCTCAGCGGCCCGATCCCCGACAGTATAGGCAACTCATGTGCTTCGCTGACAATTCTGAAGGTGTCGAGCAACAACATCACGGGACCCATCCCGGCGTCTCTGTCGGCGTGCCATGCGCTGCGGATGTTCGACGCTGCGGACAACAAG
circ_000245	chr1	184919252	184919828	-	Zm00001eb033230	184919252-184919328,184919769-184919828,	2	exon	137	GA-TG	CATGATGAGGAGAGGAGGGTCCAGCGATCTCCATCCCAGGACCTCAATAACATAAAAGCAAAACCATTCAATTGATACTTCAAATGTTGGCGCTTAAGCATATAAAGTGTACACACAGCAGAGGCCCTGGCAGAATC
circ_000246	chr1	57707508	57777877	+	Zm00001eb016490,Zm00001eb016500	57707508-57707759,57777872-57777877,	2	intergenic-genetic	258	CC-AT	ATGCCACAAAAAAGAGAAAAAAAGAGGTTTGACAACTTCCGATGACTTCAACTTGATTTGCTACTCAGTCTCAATGCTATATATTTGGAGCAAGGCAGGCATAACTGCTGCAGCCGCAGCGATTTCGGAAATGAAGTATTGCGGTGGCCCAGGACGCTTAGTCGGTTTGGGACGTGTTGCTGACGAAGGCAGGTATCACGGCTGTTGCCGCAGCGACAGCAGGCGAAGCGACCGGTACGTGTGGCCGAGCGACCACGG
circ_000247	chr1	47133515	47133739	+	Zm00001eb014020,Zm00001eb014030	47133515-47133739,	1	exon	225	GA-AG	CTATACATAGGATGGGCTACCAGGTCAGTTACCACGGCTATCTACAAACATTGAACCAAGCCTCTCACCCTGCACTTTGCGCAGCTACCAAAGAACCATGGATCATGCCTTCTCTCCTTTCCCTTCAGCACAAGAAGCATTGCCGTTTGTCAGATCTGCAACAAGCAACCGAACTTAGGTACTTGCATGCAGCAAGATTGATTGAAGTTGTCCAGGAGGCAATTC
circ_000248	chr1	6225641	6226022	+	Zm00001eb002180	6225641-6225784,6225870-6226022,	2	exon	297	GT-AC	GTAGTACTTCATGGGCTTTCAGACGCTCTGAAGGACAAGGGCAGAGCATCTTCCTTATGAGATTCTTTGCGCTTTCAGATATCTTAGGCCATGGGTCCGAGTCAAAATCAATGTGCCCCTTCAAGACAGCATCAAATATACCTTGTTGCGTCTCTGCCCAAAAAGGTGGCACCCCACTAAGCAAAACATACAGTATCACTCCAGCTGACCACACATCCGCTTCTGGTCCATACCGTTTGTGTAGTACCTCAGGAGCAACGTAGTATGGACTTCCAACCAGCTCAGTGAAAACCTGAC
circ_000249	chr1	246645604	246646193	-	Zm00001eb048000	246645604-246645726,246645821-246645881,246646025-246646193,	3	exon	353	GG-AG	CTGGCCAATCAAATGTGTTGTCAGGAAACCTCCATGTGAACCTCCAACTACGGCAACTCTGGATGGATCTATTAGTCCTCTCTTTATAACAAGGTCCAATGCCGTCAATACATCATTGACATCCTGAGAACCAATATTGCCAGGAAGGGATTGCAGTGCTTCTTCCCCAAAGCCTAATGAACCCCTGTAGTTCACAACAAGAAGATTATATCCCTGCGAAAAAAGAAAAGCCAAGGATTTGGAATAACTTGATGGATAAACTGAGTGTGGTCCACCATGAAGAACAACGATTGTTGGATTACTTGCAGAATCCTTATGCGACACAAAAATAGCCTCAAAAGGAAGCTTAGCCC
circ_000250	chr1	13758141	13758285	-	Zm00001eb005020	13758141-13758285,	1	exon	145	GT-TG	CATATCTGGCCGGACTTGAATCATCATTAGACGAATCTTCAAGCTACCAAAAATAATACCAATAATAATCCCTACACTTACTTTATACCACACCTCATATCATATACAGCTGCTTACCCTGCTTATGCTACCTCACTTACCACAC
circ_000251	chr1	146115547	146115790	-	Zm00001eb028110	146115547-146115790,	1	intron	244	GT-TG	CACATCTACGTCGTCGCTCACCACCACACCTCAACCAGCGCGCGTACAGCCGACCCGCCAGCGACGACGCGCGATCCCTCGCGCGCAGCCCGGTGACCTACTCAGTGCCCCTCGCCAGGCCACTTCCACGCCAGAGGCCTCGCCGCTCTGGGTCCGCCACAGTCGCCTCCACCTCCACCTCCACACCAGCAGGTTGCGGCACCCTCCGTTGGGACGCCTCCGCCCCGCGCCGCCGGGACGCCAC
circ_000252	chr1	85816331	85816444	-	Zm00001eb022400	85816331-85816444,	1	exon	114	TT-AG	CTGCAAAGTCTCAGGCGATGTCAGCTGGCGAAGAAATTCTGGATTTTGAAATATTTCCCTCATCTGAGGGTTTGATTCCATCAGGTTGCGTGCATTTGGGTTGAAGCTAAGCAA
circ_000253	chr1	157759518	157759618	-	Zm00001eb029200	157759518-157759618,	1	exon	101	TT-TT	AAGGGCCGTCTGTCCAAGGAGGAGATCGAGAAGATGGTGCAGGACGCGGAGAAGTACAAGTCCGAGGACGAGGAGCACAAGAAGAAGGTGGAGTCCAAGAA
circ_000254	chr1	42914126	42914499	-	Zm00001eb012890	42914126-42914351,42914443-42914499,	2	exon	283	AG-AG	CTTTGGTGATGACTTTTCTGTCTGAGTTAGCGATGTTGAAGAAGGGTTCCTCGCGGCAGCCTGACCCTGTAGCAGCAACAGGCATTGTATTCGTTGGAGATGGGGGCTTTGTCGAGAGCGGTATGGCAGATGCAACCGATCGGTCAGACAAGAAAAATGGCCTCTTCTTAATAGGCACACCAACCGCAGGCTCGTCCAAGCGCGGTACAAGTCGGTGACTGCAAACCTCTTCTTTCTTGGCTAGCGACATCTTCCGTGACAATCAGCTGATAATCTGTGTCCT
circ_000255	chr1	184069357	184069473	+	Zm00001eb032940,Zm00001eb032950	184069357-184069473,	1	exon	117	CG-AG	CTCTTCACCGGCGCGTTCCCGACGTCCGTCGCCAACGTCACCAGCCTGGAGGTGGTGAACCTCAACGAGAACCCCGGGTTCGACGTGTGGCGGCCGGCCGAGTCGCTGTTCCTGCCG
circ_000256	chr1	6783184	6783403	-	Zm00001eb002430	6783184-6783403,	1	exon	220	GT-AG	CTTGTATTGACAAATCAAGACGCAAGACACAAAACCCTAATCAGAGCAGAGAGCATATCAGAACTTGGGTGGAGACCGGCTTCCCGATGCTTTAAAAGGTCCACTTGAACCGAATGGGTCGGCGTCATCAAAAGAGTCAAACCGGCCAAAATTTCGTGAGCTATTCCCTGTGTCAAATCCTGATACATTCTCGCCCTTGGAGCTGCTAATGGAGTCGAAC
circ_000257	chr1	117751379	117751695	+	Zm00001eb026200	117751379-117751481,117751576-117751695,	2	exon	223	GA-CA	TGCAAGAGAAGTATTATGATCTGTAATTTTAAGCTTGTACACAATGCCATACTGAAACATGAGAAATCTAAGGCTGAGGATTGTCTCAAGAATACGTCCTCTGAATGTCTGGATATGCGCCTGCTCCTCATCCCACCAAGATTCCCAACTGTTGTCGCCCTTTACACCAACTCCACCTTTATAAAGTAACCAGTTTGTCCAGTCATCAAAGTCCTCAACAGTC
circ_000258	chr1	308318754	308323272	-	Zm00001eb065550	308318754-308318759,308323081-308323272,	2	exon	198	GT-AG	CTTTCCCTGCTTTTCCGATGCCTATAGCTATTTTCATTGTACACCCACTCAATAATAGATAAAGCCTGCCTCCAGTTTCCTCGTGCCTCAAGCCCATCTAGTATTCTCAGTAGATTATCTTCACTATATATGATGTCAGCCCTTTTCATCACTCTAGTAAGCCTCCAATCACGAAAACTTAGGTAATCTCCGTTTAAC
circ_000259	chr1	57068305	57069902	+	Zm00001eb016330	57068305-57068378,57069729-57069902,	2	exon-intron	248	GT-AG	CTCCCACAAAGTCTCTGGAGAGATGAAAGAATCAGATGATGAATAGCAGTAAGATCTCCATGTTCGGTCAACAATAGTAGACCAAGATCTGACAAAACTTGTAGAGTAGGCACGCGATGGATCATAACCAAATTTCCCTCTATTGATGTCCTCATCCAGGGTGATGCGCGGTAACTTTCCTTCCAGTTGGCTTAATGTGAGGTAGTAGCAGAGTGATCCCAGACTTATACCTTCCTTGCACTAGCTAC
circ_000260	chr1	45473533	45474284	+	Zm00001eb013550	45473533-45473631,45473945-45473998,45474088-45474141,45474207-45474284,	4	exon	285	GT-AG	CTTACATTTTCCTTCAGCCATTTTCATCAGCATGTTCCTCCGTATTCTTGTGCTGTTTGTGGCATCGAAAATACCAACCTGACCACCCTCCTGCATCCAAGATAGCATATCTTCCATTGCTAATGCAGCCACCTCGTTACGTGCCTCCACACCCTCCCTGTTATCTCCACGAAAGAAATCAGCAGTCTTTCCAACATTGAAGTGTTTTGTTTCATGACCTAACCATCGGAGATATCTTGTAAGTTTAGCTGCTGTAAAGGTCTTACCTCGAGCTGGTAGCCCAAC
circ_000261	chr1	209821596	209821902	-	Zm00001eb039570	209821596-209821902,	1	exon	307	TC-AG	CTTTCGTAGAAGTTGGTGGTTGCAGCAACGTTGACGATGACGTCCATCTCCTTGGCCATGCCGTCGAGTGTGGTTGGCTCCAGGCCCAGGTCCTGGTTCGTGATGTCTCCGGCCAAAGGAACGATCTTGTCTCGGATGAACAGGTCGAAGCCTTCTTCGCCGTACTTGTCTCTCAGGAGGCTGAACAGCTCGGTGCCGGTAACCTCTTGCTGGACGCGCTGCTGTGCGGAGGGCTCGTCGGCCGCTCGCACGAGGAGGTAGATCCTGCGCACAGCAGGCTGCACCCGCAGTATCTTCTCCACAAGGA
circ_000262	chr1	227877483	227877786	+	Zm00001eb043260	227877483-227877614,227877756-227877786,	2	exon	163	GT-CA	TGCGCCCGCTTGTAGCTGCCGCCGTCCGCGTCTTTGTTGATGACGAGCGGGCGGGCGGTGGTGGCCTTGCGGAGCTTCTCGAGGCCCGTCTCCGGGCGAGGCCCGGCCACCACGTCGTCCCACAGCTTGTCCAGCATCTTCTAATTCGCTCGCCGCTTTCGAC
circ_000263	chr1	71110246	71110791	-	Zm00001eb019590	71110246-71110267,71110420-71110509,71110586-71110791,	3	exon	318	GT-TG	CAGACAAATCACCAGAATAAACAGTATATGCGAAGGTAAAATCTTTGGTTGACCAATTCTCAACAACTGCTTCATGCAGGAAAGACAACTTCTCACCTTGTCTACTTTTTTCCTTCAAGGGATGGCTTGTTCCCTGCAATAAAATCTCCTTAGTCACACCACTATTCACAATCAACTGTATTTTCTCCTTTTTCATGAAAACCTTTGGCAAAGGGTTCACAAACTGCGGGAAACGAAATGGTACTTCGACAGAAAATTGTCCGTTGTCGTATAGCAATTTTTGTGACCATCTGATTGTGGCAAATATATCTTCTCCAC
circ_000264	chr1	9533485	9561616	+	Zm00001eb003550,Zm00001eb003570	9533485-9533561,9533707-9533809,9561611-9561616,	3	exon	186	GC-AA	TTGCAACATTACTCTCCTTAACTTGAAAATCGCGTCGAATCGCAAAGGTTTGACAAAATACTTGTCACCATCATCGCATGCATATGTAAATGAACTATCAAGAAGAGTACTTGCTGCACAGCTCTTATAATATGTAAAGATGATCTCATTAAGCTTCTGAGCAAGAAGATCGAAGCAAAGATCAGC
circ_000265	chr1	274679160	274681079	+	Zm00001eb055030	274679160-274679261,274681074-274681079,	2	exon	108	CT-AG	CTGTGACATGTGGTGAATATATACTCAAATGGATGGGAACGTTTGAAATAGCTTTAGTTTTCCCAGTTATGCGATCTGTTTCATCAGCAATCTCTTTCCTCACAGCAG
circ_000266	chr1	60583444	60585038	+	Zm00001eb017000	60583444-60583701,60584997-60585038,	2	exon	300	AT-AG	CTCCTTTGTTTGACCAAGTCTGTGTGTTCTATCCATTGCCTGAGTGAGCATTTTAGCTGGATCAAAATTACTCATCGGTGGAGAAGACCCAAATATCCTATAGGGTAGCTGCAGCATCGGCTCAAGGATAGGCAAATCAGTATTGAGTTCTTGTATCAAAGGATGAAGAGCAACTGGTTGTCTAGGACCATTGAACTCGGAAGTACGAGCAAATCCCAGGAACAGTTTCATGACCCAAGGATCATACATCTCATCAGTGAACTTATAGGCAAAATTTCGATCAGCACATGAAACATTTAT
circ_000267	chr1	304115466	304115588	+	Zm00001eb064150	304115466-304115588,	1	exon-intron	123	TC-GG	CCTTCTGTATGTGACACATTCAATATATGATCTTCTTTGTTTGTGGGTTCCTCCTCAATATTCATATTCTTATGAGGGTATGTAGCATGTTTGTCTCCTGGCGAAATCAAAAGTTTTTCATGA
circ_000268	chr1	59811132	59811510	-	Zm00001eb016780	59811132-59811510,	1	exon	379	AG-GG	CCCAAAAACTGATCTCAATATGTTTTCTAACCCCGTGATACCCATTTTACAGAACAGCTGAGTCCCAGCATTTGGTACCCGCACATTCTCTTCCGAAGAATGTCTCACTCATCATCGGCATGCCTTTTCTTCTTTTTCTTCTTATCTTTCTTACCAGACTCTTCGGTTTGCGTTGTAACACCCTCACCGTCCGCGTCAGACTTCTTTTTCTTCTTCTTTTTCTCACCTTCTGTGGCAGCAGCAGCAGCCACAGCAGGCTCTTCCCCGACATCCTTGGACTTCTTTTTCTTTTTCTTCTCACCATCACCTTCAGCAGCAGGAGCCTCCTCGCTTTCCTTGTTCTTTTTCTTCTTCTTCCTATCCTCCTGGACTGCTCCCT
circ_000269	chr1	56138296	56139297	+	Zm00001eb016020	56138296-56138384,56138900-56138969,56139043-56139126,56139221-56139297,	4	exon	320	GA-AG	CTTGCATGCAGTAACATTATTAGCTTTGTCCAGCCAGCAACCCCCATTGTTCTCCAAACACTCATTTGTTTGAACCTCTTCGCTCAAACAAACAGCAGGCTCAGTTGTCTCCTCGAATCCTGAACAAATCGCTTTCAGGACAGCAACTTTGTCCAGCTTACCTCTGTATTGCCTGTTGTTGATGACAAGGGTTGGTAGTATTGTGACATCTCCCCTTTTACCATGACCAATTTGGGCATCTTGTTCTGCCTTTAAAATTACGTTTTCCTCATTGGCTTCAGGGTCGCCAACACACTTGTTTATTTTCTCGATGTCCAATC
circ_000270	chr1	254590649	254590973	-	Zm00001eb049840	254590649-254590973,	1	exon	325	GT-AG	CTTCATCTTCATCTTTCTCATCAGCAGAACCTTTTTCTTCTGCTTCCTCTTCTTGCTTCTCATCGGCATCCATTTCTTTTCCTTTTTCTTCTGCTTCCTCTCCTTGCTTCTCATCTTGCTCAGCCGAAACACCTTCCTCTTGCTCCTTCGATTCATCCTGCTTATCCACAGTTGTGTCCACAACTTCATCTCCCTTCTCTTCTTTATCTTTGACCTCTGTACTTCCCGTGTCAGCCTCAGTCATCTTGACATCCTCAACTTCTTCTGCCTTTGCATTGCCATCTTCCTTTGTATCGGCATCCGTTTTGATATCTTCAGAATCCAC
circ_000271	chr1	304115466	304116070	+	Zm00001eb064150	304115466-304115588,304115707-304115829,304115948-304116070,	3	intergenic-genetic	369	TC-GG	CCCTTTGTGTGTGACACATTCAATATACGATCTTATTTACTTGTGGGTTCCTCCACAATATTCACATCCTCATGAGGGAATGTAGCATATTTGTCTCCTGGCGAAATCAAAAGGTTTTTATGACCGTCTATATGTGACACATTCAATATATGATCTTCTTTGATTGTGGGTTCCTCCTCAATATTCACATCCTCACGAAGGGATGTACCATGTTTGTCTCCTGGCGAAATCAAAAGGTTTTCATGACCTTCTGTATGTGACACATTCAATATATGATCTTCTTTGTTTGTGGGTTCCTCCTCAATATTCATATTCTTATGAGGGTATGTAGCATGTTTGTCTCCTGGCGAAATCAAAAGTTTTTCATGA
circ_000272	chr1	184924752	184925045	-	Zm00001eb033230	184924752-184925045,	1	exon	294	GA-AG	CTTTCCTGGCTGCCATGTCTGTCATTATGCCTATCACCATGTCTATCATGAATACCATGGCTGCTGCTCCTTTCTCTTTCATTCTCCTGGGTCCCAGTCGTATGTCTGCCAGACTTCCCATTCTGATCATTGCTCTCACGATCAGAACCATTAGTATCATCACCTCTTTCTCCAGATCTCAAGTGATCTCTTGAATGAGCTTCACTCTGATGCCTTGAGTATGGAGATGCTCTAGAGCGATTTTTGGGATAATGATCTTTTGAAGATGAAGAGTGATGCCCATCTTTGTGCCTC
circ_000273	chr1	306324602	306324793	-	Zm00001eb064890	306324602-306324793,	1	exon	192	GT-CA	TGCCACCTTCGACCCCGCCAACAAGGTCAGCCTCTCCCACACGCTCGGGTCCGGCGGCTGCCGCGTCAAGTACACCTACGCGCACGGGGTCGAGCGCCTCACCACCATCGAGCCCCTCTTCGACACCAACAAGAACGCCTGGGAGTTCGCCGTCACCAGGAAGTTAGCGGGAGGGGACGCCGTCAAGGGCAC
circ_000274	chr1	80890038	80896583	+	Zm00001eb021300	80890038-80890079,80890192-80890250,80895762-80895837,80895917-80896048,80896476-80896583,	5	exon	417	GC-CG	CGTGGCAAAGTTCATTGTAAATGGGACTGTCAAAACAGCTACTCCTCTAGAAAAGTACTTCATTTTACCAGCCATAGGATTTCCCTCCATTCCTTCTTGCAAGTTAAGCTCCACTGTGGCCAAGAAGGTCAGTCCTGTTAACATAGGCAAGATGTAAAGAGAATCTGGAGTCGTCAGGTCAGTAAACCACAATGTTCCACCTCCTTTGAATGAAGGTACTTTCTCAACCATGTTTGATATGGCAAAGAAAAAGCTCATGAATATTGGCCCTTGGATCAGGAGTCCTTTCATTGGAGTAAGTGGACTAACACCATGTTTTTTGAACAGCGCTTTCATTTTAGCTTGTCCCTCCTGCACTGATTTTGGATCCATACTATTCATCTGGTCTTTAATGACTTC…
circ_000275	chr1	80890038	80896583	+	Zm00001eb021300	80890038-80890079,80890192-80890250,80895762-80895837,80896023-80896048,80896476-80896583,	5	exon	311	GC-CG	CGTGGCAAAGTTCATTGTAAATGGGACTGTCAAAACAGCTACTCCTCTAGAAAAGTACTTCATTTTACCAGCCATAGGATTTCCCTCCATTCCTTCTTGCAAGTTAAGCTCCACTGTGGCCAAGAAGGTCAGTCGGCAAAGAAAAAGCTCATGAATATTGGCCCTTGGATCAGGAGTCCTTTCATTGGAGTAAGTGGACTAACACCATGTTTTTTGAACAGCGCTTTCATTTTAGCTTGTCCCTCCTGCACTGATTTTGGATCCATACTATTCATCTGGTCTTTAATGACTTCCATCTCTGGATTTATTGC
circ_000276	chr1	296049918	296050651	+	Zm00001eb061170	296049918-296049974,296050085-296050147,296050231-296050371,296050571-296050651,	4	exon	342	GT-AT	ATTTGTTTGGCTTTCCCTGTCCAGATCAAGATGCATCTTAATGTCATCACATAGCTCTTCCATTTCTTTCACTGTTAATCCCTTGAACACCAGATAAGGCTCATTTAACTCAATGTCAAATTCATCTGAGAAACTAAGATTCTTAAGGAGAACATCAATAGGCTTTGTACGCCCCTCCCGCAACCTGATCTCAGACCTGACCTTGCTTTGGTCAAAATGAAACTCTTCCTCCTTCTTCTCCCAGTCTTGAAACTCTGCACGTGCTCTTTCTCTAGCTATTAACGCCATTTCCTCTTCGTGCTGTGCCTTTTCAATAGCTCTTTCTTCCCTTCTTTTCTTAAC
circ_000277	chr1	245161787	245162988	+	Zm00001eb047740	245161787-245161990,245162071-245162243,245162892-245162988,	3	exon	474	GC-TG	CAATAGACTTTCTGATGGAACACGTTCTACAGCTGCCCTGCCAGCAAAGAAGCCACGGCCAAGTGGGCTATATGGAACTATTCCAATACCAAGCTCCCTGCAGACTGGAATTATATCTTCCTCTATATCTCTGGTCCATAGTGACCACTCCAACTGCACCGCAGTAATTGGATGGACAGCATGTGCCCGTCGAATGGTATCGGCACTAGCCTCTGATAAGCCAACATACCTCACTTTCCCTTCTTCAACCAACTTCTTGAGCTCTCCCATAGTTTCCTCTATAGGCACTGACTGATCAATGCGATGTTGGTAGTATATATCAATGTAGTCAGTAGCAAGGCGCTGAAGGCTTGCTTCACAACAAGCTCGAACATAATCTGGAGTGCCCTTCACACGCAT…
circ_000278	chr1	210134006	210135213	+	Zm00001eb039660	210134006-210134075,210134591-210134640,210134741-210135018,210135140-210135213,	4	exon	472	GA-TG	CAGGGTCACACCATGAAATAACAGGCAAGCGCTTGCCTGATCGAAATGGGGAGGCTTGAAATAAATCTTCATCACTTATGCTTCTTGGTACAATGAGTTCAGAGGGGTAAGTTGAACACAATGAATAACTAGAATTAACTCTAGTTAGCCTCCACCATTCATTACACAAAGAAACTTCCTCGACTCCCTGTAGCGGTAAACTTCTCCTAAAAAGACGAAAGTATTCCCTCAAGAGACGCCACTTTGGCTCAGAATCATGCTTAATGGTGGATGGATCACAAGAAAATGCATATAGATCCCACAAATTAGCAGGTTTAGTGTATCTCCTCAAAGCATCAAACACTTCATTTTTCTGCTGTGTTCTGGGGATAAAAGCAAACACAATGATTCTCATGTCTT…
circ_000279	chr1	30883588	30884002	-	Zm00001eb009870	30883588-30884002,	1	exon	415	GT-AG	CTCCCTTCCCCTTGGCTTCTCCTCTCACCACCGCCCAACTCCCAGAATCCGGCCGCAGCCCCAGTCCCAGTCGCAACCACTGAAGGCAAAACCCCTTAACCCCCTTCGCTTCAGCCTAGCCCTCACCCCGGCGACCGCGAAGCCCCGCCTCGCTGCGATGCCCGACGATGTCGCTGTCGCCAACTTCGTGGAGAAGGACTGGTCGTTCCTCGAGTCCGCGGGCGCAAACCTCCAGCGCGCTCTCGCGTCGGGGGCGCTCTCGCCGGCGTCGCGGGTGTTGGCATTGACGCCCACGGCGTCCTTCGTGAGGTCGCTCCTCGCGTCCTCGCCCTGCGAGCTACTGGTGGCCGCGCATGAGTCGATGTACGTGCTGGCAGGGGTCAAGGAGGCGCACGACGA…
circ_000280	chr1	6112598	6112873	-	Zm00001eb002100	6112598-6112873,	1	exon	276	GG-AG	CTCATGATCAACTTCAACAGCATGTTGTTGTGTAACTGCTTTTAAAACTTCAAACAGAATAGCAGCAGTCTGGTAGGCTTTGGTTAGTTGAGCACTGCATGAATGAAGTAAATCCCGCAGCAATAACATTTATGGACAAGGAGAATATGGAATTAAAGAAAAACATAGGATGCATACCGATCCAGTTGGTCAGAAGCATTCTGGAGTGCTTGAATATATTTCTTGTAATAGCTATGATAGAAGGTCTGTATTTCCCGTGCATCACTCTTTTGTCCC
circ_000281	chr1	1201731	1202203	-	Zm00001eb000310	1201731-1202203,	1	intergenic-genetic	473	CG-CG	CGTTCATGAACCACTCGTCGTCGGAGGAAATGTAGGCCCGCTTGATGATCAACTTCAGGTCGGTCATCACCTAAACCACCTCCAGCAAGGTCTCGTACTTGTTGGCGCTGTCCACCTGCAGCCAGAAATTGAGCAACCTCACAATACCACGAAAAAATGGATTATTCCCATGTCGCTAAGTATGAGTCGAATGATAGAAAGCCAGAGGCGAGAAAAGTTTGCTAGTATAACCAAAGAGTAACATAGCACGATGGTCCCATGTGGCAATCCGATGCAATCGCAGAAGCTCGTCTCTGCCGACTACCACAGTGCACGACCATCTGTTGTAGGCTTATATCGTCGAATCAGATGGGAAAGGGGGCGAATCAGGCACAATTACCTTGCCGAAGCGCTTGAGGT…
circ_000282	chr1	1201731	1202203	-	Zm00001eb000310	1201731-1201845,1202110-1202203,	2	intergenic-genetic	209	CG-CG	CGTTCATGAACCACTCGTCGTCGGAGGAAATGTAGGCCCGCTTGATGATCAACTTCAGGTCGGTCATCACCTAAACCACCTCCAGCAAGGTCTCGTACTTGTTGGCGCTGTCCACCTTGCCGAAGCGCTTGAGGTGCAGCCACCGTAAATCTTCTGAAAGCCACCCACACCAATGTCTTGCCTCTGGTAGATCTTCCTTGCAATGGACG
circ_000283	chr1	243571510	243571878	-	Zm00001eb047450	243571510-243571585,243571663-243571878,	2	exon	292	GT-TG	CACGCCGTTCCGCCGCGACTACGACCTCGAGTCCTACATCGAGTTCGTCGTGCAGTGCGCCTCCGACTTCATCAAGAAGCTGTACGGTCTGGGCGCGCGGCGCATCAACATCGCCGGCGCACCGCCCATCGGGTGCGTGCCGTCGCAGCGGACCAACGCCGGCGGGCTGGATCGGGAGTGCGTGCCGCTGTACAACCAGGCGGCCGTCGTGTTCAACGCGGCGCTGGAGAAGGAGATCAAGCGGCTCAACGGCAGCGACGCGCTCCCGGCCTCCGTGCTCCAGTACATCGAC
circ_000284	chr1	29508419	29508862	+	Zm00001eb009540	29508419-29508496,29508582-29508680,29508761-29508862,	3	exon	279	GT-AG	CTCCGGCCTCTGCTCGTGGGGAGCGGCCCGATCCTTGGGCTGGCTCCGGCCCCCGAGTACACCTTCCTCATCTACGCCGCACCCGTTGGGAACTACTTCAAGGAGGGCCTGGCGCCCATCAACCTGGTGGTGCATGACGAGTTCCACCGCGCGATGCCCGGCGGCACCGGCGGGGTCAAGACCATCGCCAACTACGCGCCGGTGCTGAGGGCGCAGATGGACGCCAAGAGCAAGGGGTTCACGGACGTGCTGTACCTGGACTCGGTCCACAAGCGGTAC
circ_000285	chr1	304115466	304115829	+	Zm00001eb064150	304115466-304115588,304115707-304115829,	2	exon-intron	246	TC-GG	CCGTCTATATGTGACACATTCAATATATGATCTTCTTTGATTGTGGGTTCCTCCTCAATATTCACATCCTCACGAAGGGATGTACCATGTTTGTCTCCTGGCGAAATCAAAAGGTTTTCATGACCTTCTGTATGTGACACATTCAATATATGATCTTCTTTGTTTGTGGGTTCCTCCTCAATATTCATATTCTTATGAGGGTATGTAGCATGTTTGTCTCCTGGCGAAATCAAAAGTTTTTCATGA
circ_000286	chr1	304115466	304115829	+	Zm00001eb064150	304115466-304115588,304115733-304115829,	2	exon-intron	220	TC-GG	CCGTCTATATGTGACACATTCAATATATGATCTTCTTTGATTGTGGGTTCCTCCTCAATATTCACATCCTCACGAAGGGATGTACCATGTTTGTCTCCCTTCTGTATGTGACACATTCAATATATGATCTTCTTTGTTTGTGGGTTCCTCCTCAATATTCATATTCTTATGAGGGTATGTAGCATGTTTGTCTCCTGGCGAAATCAAAAGTTTTTCATGA
circ_000287	chr1	10459592	10463257	+	Zm00001eb003810	10459592-10459651,10459937-10460032,10460804-10460925,10462159-10462238,10462631-10462766,10463176-10463257,	6	exon	576	GT-AG	CTAAAAGGTCGATTGCAGTAATCACAGCTTGCTTTGCAGTAGGATGCTGAACATGAAGCAACCTTCCAAGCATATTACTCCCCACAAGTGCATTAATTCTGGCTTCAATAACAGTTGATGGAGCATATCTTGCGGCATAACCATACATCAACGCCAATGCTGCATATGTGTCATCAACATCTTCCACTTTTGGGCCGAATGAGAAAAATGAGAGGAACCTCTGGAAAGCACTTTGCTCTGCACTATCTAGTATGTTCTTCAGTTTCTCCAACACTGTATCTAAATGAGAAGCCGCAACCTGTGCAGCAAAGCAGCGTGTCCGTCAGATATAGAATACAGATCATACTGCCGTGCAAATGCATCACCCAAAGAAATGACCCACTCAGTATCATTCACAAC…
circ_000288	chr1	10459592	10463257	+	Zm00001eb003810	10459592-10459651,10459943-10460032,10460804-10460925,10462159-10462238,10462631-10462766,10463176-10463257,	6	exon	570	GT-AG	CTAAAAGGTCGATTGCAGTAATCACAGCTTGCTTTGCAGTAGGATGCTGAACATGAAGCAACCTTCCAAGCATATTACTCCCCACAAGTGCATTAATTCTGGCTTCAATAACAGTTGATGGAGCATATCTTGCGGCATAACCATACATCAACGCCAATGCTGCATATGTGTCATCAACATCTTCCACTTTTGGGCCGAATGAGAAAAATGAGAGGAACCTCTGGAAAGCACTTTGCTCTGCACTATCTAGTATGTTCTTCAGTTTCTCCAACACTGTATCTAAATGAGAAGCCGCAACCTGTGCAGCAAAGCAGCGTGTCCGTCAGATATAGAATACAGATCATACTGCCGTGCAAATGCATCACCCAAAGAAATGACCCACTCAGTATCATTCACAAC…
circ_000289	chr1	27040590	27041162	-	Zm00001eb008790	27040590-27040711,27041157-27041162,	2	exon	128	AT-AG	CTAAACGGCCGATGAACGCCGTGTCCACCAAAGAGGCGAGCGGATCCGCCGCCAACGCAAGCGACGCGGGCACCGCGATGCGCAGCACCTCCGACCCAAGCCCGTCCAGCTTGAAGACGCTCTCTGAT
circ_000290	chr1	5437241	5437917	+	Zm00001eb001870	5437241-5437325,5437401-5437515,5437604-5437726,5437817-5437917,	4	exon	424	GA-AG	CTCATTGACGAAACACCATTCACTGATAGATGTGTACCTCCATAGAGCCTGTGTAGCTTCAGAATAAAGTCGTACCATTTGAAATCTTGAAGAATAACAACCTCAAGGTTGCCACTAAACGGATCAGCTGTTGGAGTTATCTTCATACCACCACCGAAGTATTTGGCATTCCCTATGCACAGGGCTGTGACGTTATGAACAGTTCTCCATTCTCCCCCATTTACCTTTATTCTCATATCTTGATTATTATGTCCCCAAAAGGCTCTTAAAGCTCCAAATACATAGCATAAGTTACCAAAACTCTTATACATAGAAGCAAAATAACCTGCCTTAGCACTCAAATGGATATCAGCAACATTAACAAAGAAGTGTGGTTCTCTGTTTGGACCCTCCATCACG…
circ_000291	chr1	5437241	5437917	+	Zm00001eb001870	5437241-5437325,5437411-5437515,5437604-5437726,5437817-5437917,	4	exon	414	GA-AG	CTCATTGACGAAACACCATTCACTGATAGATGTGTACCTCCATAGAGCCTGTGTAGCTTCAGAATAAAGTCGTACCATTTGAAATCTTGAAGAATAACAACCTCAAGGTTGCCACTAAACGGATCAGCTGTTGGAGTTATCTTCATACCACCACCGAAGTATTTGGCATTCCCTATGCACAGGGCTGTGACGTTATGAACAGTTCTCCATTCTCCCCCATTTACCTTTATTCTCATATCTTGATTATTATGTCCCCAAAAGGCTCTTAAAGCTCCAAATACATAGCATAAGTTACCAAAACTCTTATACATAGAAGCAAAATAACCTGCAAATGGATATCAGCAACATTAACAAAGAAGTGTGGTTCTCTGTTTGGACCCTCCATCACGCCTACGTCTA…
circ_000292	chr1	187924630	187925469	-	Zm00001eb033960	187924630-187924635,187925196-187925469,	2	exon	280	TG-TG	CACACCCTGAGCATCATGTGGTAGTCATCGTGCTTGTCGGGGAGGAAGCCGTGCGCGGCGAGGCGGTCCCGGAAGGAGGCGACGGCGCGCTCCTCCTCGGCGTCGCGGACGTCCTCGATGGAGATGGCCGCCGGCGGGAAGCGGAAGTCGACGCGGCGCCTCCCTCGCTTCTTGAGCGCGTGGATAGCCTTCCGCCGCAGCGAGCCGATCTTACGCCGCCGCCGCTCGTCCTCCGAGTTGCCGTCGCACAGTGATATCTCGATGTCCTCCGCGTGGCTCA
circ_000293	chr1	41628169	41629352	-	Zm00001eb012610	41628169-41628225,41629130-41629352,	2	exon	280	GT-CT	AGCACTGGCAGCAGACTGGGCAGCAGATGCTGCAACTAATGAAAGGCGTCCAAATCCCTGAGAGACAACCTGCATGACATCGCCCTGGGCAGCACCGCCGTTCCTGTTAGCCGACGGCGGTGGGCTGGATCCGAACCCAACGTACTTGCCGCCCTGGGATGGCGGGATCCCGTCAGGCTTGGACTCGTTCTCCGCCATCCTCCTGGCGAAAAAGTCCTCCTTATTTGCCGCCGACGCCTCCAGTTGCTGCCTCGTGTACATGTCCTGTGTTGATTTGGAC
circ_000294	chr1	254590649	254590780	-	Zm00001eb049840	254590649-254590780,	1	exon	132	GT-AG	CTTCATCTTCATCTTTCTCATCAGCAGAACCTTTTTCTTCTGCTTCCTCTTCTTGCTTCTCATCGGCATCCATTTCTTTTCCTTTTTCTTCTGCTTCCTCTCCTTGCTTCTCATCTTGCTCAGCCGAAACAC
circ_000295	chr1	58795121	58797005	+	Zm00001eb016640	58795121-58795205,58795309-58795371,58795510-58795615,58796866-58797005,	4	exon	394	TG-AG	CTCCGAAAAATGAGATGAAATAATATTAGACACGATGGCTTCTGCACTTTGTTGCCGTGGGATAGCTTCTGAATTTGTTCCATCAGAGTCCTTCAGGATCCTTTTTAGGTCCATGGTCGGGCCTACTAAGTACGAGGGATCTATGTGTATGAAAACTTCAGCAACTTGATTGTGCTCCTTTTGAATTTGATGACGAACAGTTTCACCGATATCATGTGCTGCACTAACACTCAGAAAAGGATATACCTCTATATGCACATCAAGATATAATGATGTCCCAGCTTTTCTTCCCCTCAATCGATGACATCCCTTCACACCGTGAACCCTCAAAATAGTTTCCTTGATTGGTTCTAAAAGTGAAGGATCCACAGCAGCATCAACTAATTCCAGAACA
circ_000296	chr1	117743162	117744231	+	Zm00001eb026200	117743162-117743286,117743403-117743449,117743596-117743708,117744226-117744231,	4	exon	291	GA-AG	CTGGATCGGCATATATATCTTCGCTTATATTAATCACTCGAGACGCCTTGCTAATGCCACCTCGGGTTATGTGAAATATCCGATCAAAAACATCAGGATGTCCATAGTGCATTCGAACTTTGAGGTAAGCAAGAACACGTTGCCCCAAAGTAACAAAACTAGTCTCCTCCCCGTGAATACATGCTCCCTCACACCTAGGATTGTGGGCTTCCGTATGCCATGTTTTCCATGAGCATTATGAAATTCTTCAAGTAAATTTCTCATTTTCATTGCTTCCTCCAAGTAGTTATC
circ_000297	chr1	185035264	185036923	-	Zm00001eb033240	185035264-185035319,185035471-185035515,185036361-185036426,185036507-185036559,185036624-185036741,185036822-185036923,	6	exon	440	GA-CG	CGTGCCTCTCAAAGTGGCCATTATTTTGTAGAACACCATCTGCAATAACAACCCCACTCAGTATAAAAATAAGTGTATTTGCAATGTAAGCAACCATTTCCCAGAAATGGTGTAAGCTTTGCTGACTTTCACCCTTAAAAGCAGTTTTTGCAAAAGCTGCATAGAACATTCCCAGTGTCATGACAGTCAAAACACCAGAGACCTCCAGTGAGTCTTGTGCAGTGAAGAAAGCTATATAACTGACAGCAAGAGTAAGTGCAATCTCTATGATTGTATCGTTAAAAATAAAGCCCAGCCACAGTATTGACATGATTCCAAATGCAAGGCCCAGAGCAACAGCTCCAAGTGAAACTTCAGACAAGAACTTTATTATTGAGCCAGCATCAAAGGTTCTTCCAA…
circ_000298	chr1	41376531	41377012	+	Zm00001eb012570	41376531-41376866,41376983-41377012,	2	exon	366	TT-AG	CTGCAGCTACAGTTCCGACGCGAGGATATGGTACGACTACTGCTTCATGCGGTACGAGAACGCCAACTTCTTCGGGCAGGCGGACACGGACGCGGGCGTGATCCTGGTGAACGTGCAGGCCATGGACAACCCGAAGGCGTTCGAGAAGGCGGTGGGGAAGGTGATGGGCAAGGCGACGGCGCAGGCGTCGGCGGCGGGCAGCGCGGGGCTCGGGCGGGACAAGGAGCAGTACACGCCGTTCGTGTCCATCTACGGGCTGGCGCAGTGCACGCGGGACCTCGCGCCGCTGACCTGCGCGCAGTGCCTGTCCACGGCGCTGTCCAGGTTCGGCGACTACTGCGGCGCGCAGCAGGGCTGCCAGATCAA
circ_000299	chr1	57085235	57085882	+	Zm00001eb016330	57085235-57085240,57085462-57085563,57085659-57085736,57085811-57085882,	4	exon	258	GA-AG	CTTTATCCGGTACATCCCAAGGAGTTTTGCTAAAGGGGCAAAGACCTGCAGTGTCTCCACGGCGATGGCATACTGCTTGTGCTGAGGCATATGTGTGAGAGTGCGCATGTTATGCAACCTGTCTGCCAGTTTGACAATAATCACACGAACCTCTTCTGTCATGGCAAGAAACATCTGCCTTAGGTCTTCTGCTTTAATATCTTGTTTTGTGCTACCCTCACTTTTACACTGAAGTTTCCCCAACTTAGACACAAGTTC
circ_000300	chr1	10440307	10440903	+	Zm00001eb003810	10440307-10440397,10440476-10440571,10440682-10440760,10440840-10440903,	4	exon	330	AT-AG	CTTTAGATCACGTGAGCCTGTCCATACTTTTATAAGTAACTCAAATACTGAATTCATGAAGGACATAACATCGTTATCAAGAGGAAGCTCAGAGGGGGCATCTCCCAGGTACTGCCATGCAGCCTGGCACCAACACTTGAATGCATTCGCAAAAACAGGCCGTTGGCCATCTCGCACACTTCCTAGGATAGGTAAAACACGCAAAAGCACGTCCTTCAACCGTGGGGTGAACTGCAAAGCTTCAGAAGACGCAAAATCTGCAAGTATTTGTAACATGGCTGGCAGAGCAGAAGTTGGTCCAGAGAAGTGAAGAAAAATTTCCCCCATCAT
circ_000301	chr1	61259188	61259820	+	Zm00001eb017140	61259188-61259380,61259500-61259820,	2	exon	514	AT-TG	CAGGTATCCGCGGTAAGCCGACTGGATGGCGACGGCGGCCTGCTCCCGCTCCTTCTCCTGCCCCCGCACCTGCCGGGGCAAGGGCGGCACCACCGGCGCCTGGCCGGTGAGGCGGACCACGTGGGCGGCGGCGTGCGCGGCGGCGACAGCGGCCTCGGCGGCGGCCGCGGTGGCGAGGGCGACGGCCACGGCGTGCTTGCTCTGCTCGTCCTCCGCCCGCCTGATCTGGTCCGGTTCCGTGGCCGCGGGCGCGGGCGCCGGGAGCGCGAACGACTGCTGCGCGCGCAGCTTCCCCGGCAGCCACCGCTTGCTCTTGGCCTTCTTGTCTGGTGCTGGTTTGGGCGCGGGCTTGGGGTCGGACGACGAGGTGGTGAAGAGCCGCCTGATGCGCTCGATCCA…
circ_000302	chr1	211801611	211801888	+	Zm00001eb040150	211801611-211801888,	1	exon	278	CA-GC	GCACGAGCCGGAGCCGAGGGCGCGCCCATCCGGACCCAGACAGAGCTCGCCGGCGCCTGCGCCTCCACCGTTCGGCAAGCGGGAGGGAGATGAGGGGTTCGTCGCGGAGGCCGGTGGCCGTGGTGATGGCCTGGGTGCGTCGCCAGCCGCCCAAGGTCAAGGCCTTCCTCGCCGTCGTCGCGGGGATGGCCGCGCTCGTCTTCATCCGCTTCATCGTCCACGACCACGACAACCTCTTCGTCGCCGCCGAGGCCGCGCACGCGCTCGGGATCGCCGTG
circ_000303	chr1	304115707	304115829	+	Zm00001eb064150	304115707-304115829,	1	exon	123	TC-GG	CCGTCTATATGTGACACATTCAATATATGATCTTCTTTGATTGTGGGTTCCTCCTCAATATTCACATCCTCACGAAGGGATGTACCATGTTTGTCTCCTGGCGAAATCAAAAGGTTTTCATGA
circ_000304	chr1	225639850	225639990	+	Zm00001eb042760	225639850-225639990,	1	exon	141	AA-AG	CTTCTCATGTTTCTTGGAATGATCACCACCTAAATCATGATTCCCACTCTTGTCCTTTTTCTTTTCTTTGTCTTTGTCCTTATCTTTATCTTTATCTTTACTCCGATCTTTATGCCGATGTTTGTGTTTCTTCTGCTCCTT
circ_000305	chr1	9560799	9561616	+	Zm00001eb003550	9560799-9560804,9561395-9561616,	2	exon	228	GT-AA	TTGCAAGAAATTTGAACTTTTAGTCCTCTCTGAAGATTGATAGTGTGATACTGTCGCACTTTCTACTTCTGCCACATTGAGAAATTGATAGGAGAAATCAAAAAGCTCGAAGTGCTGCTGCTGTCCCAGTAAGTACATTATCGTACAGCCAGCCCAGGCTACAGAATCACCCAGCATTTCTTGTTTCTTCGAAGGATTGTTAATGCTATCTTCTAAGTAACTGCAGAC
circ_000306	chr1	280496504	280498604	-	Zm00001eb056470	280496504-280496914,280498470-280498604,	2	exon	546	AT-TT	AATAGCTTGTTTTGCAATCACCATGTCTGATGCTCCGTGTAGAAAGAGTACATCAACTGCCTCACGCAAATTCTTAAAAGGGTATCTGTCAATACTAAAATGATCGGTTGTAATTGTGGAACAGAACATAGATGATGATTGTTCATTCTGTAAACATGTGATTGCTATTTCTTCCTCCTTATCCATATAACTTTGTTCAATCCCAAGGTTTTGTAGGGCCTGCTCAATGAATAGTGTACTCTTACTGGCTTGATTTACATCTGACACTTCATCAGAAAATCCAGGCCATTTTGTTTCTGCATATGCTTTCCTTTGAATCACATCAGAACTCCATGATGTATGATCAGCGTACCTTGAGCAGATATCCTGAATAAAGCTATGCCTGATACACCAGATCAT…
circ_000307	chr1	175550993	175551091	-	Zm00001eb031330	175550993-175551091,	1	exon	99	TT-AT	ATGCATTTGAAGCACGGATATATGCTGAAAATGTTCCAAGAGGGTTTCTCCCTGCAACAGGAACCTTACATCACTACCGACCAGTCCCTTCTGACCCAA
circ_000308	chr1	4198151	4216409	+	Zm00001eb001430	4198151-4198328,4198424-4198476,4216339-4216409,	3	exon	302	CA-AG	CTGGGTAAATCTTCTGGAGATAAAACAGTGTAGTTATACCGTCTTCGTTTTTCTTCTGAAGTTCAGCCATGTTGATATAGTCAAGGGGACTCTCATGCATGCCTCTTCCAACATAATTATTCTCCTGATGCATCCACTTAACAAGGCGTACAGCAGACCAGCGATAGCAAGCCTCAGCCAAACCATGGCAACAAGGGACACTCATAAGTAGGCTGAAAATTATCTTAATGCCCACATATGCACTGATTACAAAAACATATATCTTGAATGTTGCTGACTCTGTGCCATCTTGAAGTGTCTTG
circ_000309	chr2	84080276	84091008	+	Zm00001eb086500	84080276-84080374,84080461-84080562,84090680-84090838,84090913-84091008,	4	exon	456	TT-AG	CTTTATCAAACGGTTCATGTGGTATACATTAAATCCTTGAACGTCGATGTGATGTTTTGCATCTTTTACAAACCCAATTGTTACATCAGCTACCATATTTGAATCCTTCGGATGTCCATTAGGTGCCACAGGCCTGTAGGTGACCTCTTTCTTCAACATCATGTCAGTCACAATATTATGGTGTTCAATCTCTTTTCCGCGCAAAATCATTTGGAAGTAAGTCGGAAGTCGCAAATACAAAATTGATGCATAACTTCTCAATGAATGCCTATATGTGAGGTAATGCTTGGAGTTTGGGAACTGATTTGCCATCTGGATATTTTTCTCATCACGATTACCACCTCTGAGTTGAATATCATGTATTTCAGCATCAAAATCAAGCTCCAAGTCCCCTTGGTC…
circ_000310	chr2	233443677	233449111	+	n/a	233443677-233443682,233448725-233448798,233448958-233449111,	3	intergenic	234	GG-TG	CATCAGAATATAAGGCAGTCTCAGCTGGTATGTGGTTGAAGTCATGGACTTCTTCACGCTGGTATGCTTCCGGCACCCTAAATATATAGTCCATATCTTCATCCAGACTCTCGGATAAATAGAAACAACCAAGTTTCTTAGGTTTTGCTTCAACCAAGAACCTCTGGAACTTTATTGATGAGCGCTTGAAATACTCCATGTCAATGACAGCTGAACTATGTCCATGATGTTTCC
circ_000311	chr2	236988806	236989287	-	Zm00001eb115830	236988806-236988910,236989019-236989078,236989149-236989287,	3	exon	304	GT-AG	CTGCTCATGGGCGGATTTGAAGTCGTCTATGCTAAGAGGACGGATGTGCTCGCTTCCATACAATGCGGGCTCTGGCCTACCTTCTGTTTTAGCCAAACTCTTCTCCTTCTTTTCCTTCTCTAGGATTTCTCGAATGGGGTAATGCGCTGCGGTCACACACAGATTCTTCAGGTCGCTTCCTGAATAACCATCAGTCATATTGGCAAGTGAGTCGAGATCAACATCCGATCCCAGCTCTTCTTTTGCCAAAATTACTTTCAGAATTTTCTCTCTATTTGATGCATCAGGCAAGTTTACCATTAAC
circ_000312	chr2	162786833	162786949	+	Zm00001eb094990	162786833-162786949,	1	exon	117	CG-AG	CTTCGTTGAGTGCCTGGATTTGCTGCTGTTATCAACACCAGGATTATTCTCCCTTCCCTTCCGGTCAGCCATTATTTCATACACAGATGGATGATCATTAATCATGTTGAATAATCG
circ_000313	chr2	241937801	241938009	+	Zm00001eb118020	241937801-241938009,	1	exon-intron	209	TC-GC	GCGCACACGCCGCGGCAGCGGCAGGGCCGGCCCCCGCGCGCCGGCTCCGACCCGCTCCTCATCGTCTGCGGCTGCTTCAGCGTCGTCACGGTCGCCACCGCGCTTCTCTGCGTCGCCGTCAACGTCGTCTCCGCCGTCCAGTCCTTCCGCGCCGGCTCCGATGTGCGTGGCCTGCCCCGCCCCGCTCGCCCCGTTCCGTTCCAGTGCGA
circ_000314	chr2	212638936	212639182	+	Zm00001eb107130	212638936-212639069,212639177-212639182,	2	exon	140	GC-AG	CTCAAAGCGAGGCAGAACGGATCAAGAAGTGCAGGGGCAGGGTATTTGCTCTGCAGGACGAACCGGAGGTGCCTCGGGTCTGGCTGCCGTTCGACGACGCCCCTGGCCTGGCGATGGCCCGGGCGTTTGGGGACTTCTGC
circ_000315	chr2	17942897	17943080	+	Zm00001eb073730	17942897-17943080,	1	exon	184	GC-AG	CTGAACACCTTGGAAGATGGTACTGGATTCTCAAGAATGTAGAGGCAATTTTATCCTTCTTATGACACAAAACTCGAAGAAGGGTGTTGGCATCATGTACATATCTTCTTCGAGCATTTGTAGCTTCAGGATCGTGAGGCATTTGGTCACTTGCATTTATCAGCATATCAATAACTGCATCGGC
circ_000316	chr2	231536077	231538343	+	Zm00001eb113880	231536077-231536082,231537178-231537226,231537608-231537639,231538245-231538343,	4	exon	186	GT-AG	CTTTCCAACACAGTTTGATATCCATGGGCAGTGATGGTCGAACTGCTCAACACAATGCTTACAAGTTGGACAATGTTTGGAGCGCATAGGTCGAATTATCTTGCAAGTAGGGCATAGCTGAGACCAATTGCCTTTGGGTCAATTCGCTTGGAATTTGCCTTGATGTAGCCAGGATTTTTTTACAAC
circ_000317	chr2	26332017	26332192	+	Zm00001eb076200	26332017-26332192,	1	exon	176	GC-CA	TGCGCCAGGGACCCCAACCGGCTGCAGCAGCTGGACGTCGTCACGCCCGATGCCTTCGACAACGTCTACTACAAGAACCTCAACGCCAGCCGGGGCGTCTTCACGTCCGACATGGCGCTCATCAGGGACCCTACAACGGCGCCGATCGTCAGGTGCTTCGCGGGGAGCAAGGACGC
circ_000318	chr2	3064293	3064900	-	Zm00001eb066940	3064293-3064383,3064699-3064900,	2	exon	293	GT-TG	CAAGGTTTTCCACCCGAACATCAACAGCAACGGCAGCATTTGCCTTGACATTCTTAAGGAACAGTGGAGTCCTGCTTTAACTATCTCAAAGGTTCTCCTGTCAATCTGCTCACTGCTCACGGACCCAAACCCTGATGATCCTCTTGTCCCTGAGATTGCTCACATGTACAAGACCGACAGGGCCAAGTATGAGTCCACCGCACGCTCCTGGACACAGAAGTATGCCATGGGCTAGAAGCAAGGCTAAAAGCTGGCCAAACTGGTGAATGTGCCGGACCCCAAATCGTTATCAC
circ_000319	chr2	174023928	174024194	+	Zm00001eb096850	174023928-174024064,174024070-174024194,	2	exon	262	AA-AG	CTTCTCATCTACACAGAGCGAGCTCCTTGGAGGTGCCATCTTCTTCACCCTTTCTGGCTTGCTAACTTGAGCTCTCTTTCCCCAATTACTGAACCAACCTTTCTTGTCATGCTTACTCTCCACATGAAACACTCATGCCCTCGATGGGTATCTCCCTCTCCCTTGGCTCAAAGCAACTATGTCGAGGGCCAGCAAATGAGTCCGACTGGTCTTCTCCACCGGCATCCGGAGAATCCATTTTTAGCGCAGCCTCCAGCTGTTT
circ_000320	chr2	132142384	132142956	-	Zm00001eb090920	132142384-132142540,132142627-132142661,132142780-132142956,	3	exon	369	GA-TG	CAGAACGTCTTGGCCTATCCAAGCAAATGAAGCATGGCGATACACAGCCCAGAGAATTGCAAACACCGCACAAAATGGTACAATTCCAACAGATAAGATCAAGACCTCCCCCAAAACAGGGAGTTGTACAGTCTTTTGTCCACAGTCCTTAAAAATCCTAGCTAGAAGCGTGACCAAGCAAGCATGCATACCCTCAATACCACCAATGCAGAATAGTACAATTAGCACCCAAACGAACCAAGATGACATGAAGTAGAACAGGAGGAGGAGGAAAACTGAAGCTACTATAATAAAAATAAAAGCACCCTTCGCGCTGATCTCGAAGACCTCTTTATCTTCTCTGTATTTTGTTCCCGTGTCAGGTCCATC
circ_000321	chr2	181087665	181088970	+	Zm00001eb098450	181087665-181087670,181088776-181088970,	2	exon	201	CT-AA	TTTCGCATCGCGACCTGCTCTCAATTCTTGCAACAATTCATATGCCTTGTCCTTTCTGGCAGTTGCTGCATCTAAATCTTCTTGAAGCGATGCAATCTCAGCATCAACAAGTTTTAGCTCATCCTCCAGGACCTTAATCTTAGATCTTACAGCCTGTCTTTCTTTCTTTATTTCATCAATGCCCTCCCCAATGATCTGCAG
circ_000322	chr2	3924998	3925080	+	Zm00001eb067460	3924998-3925080,	1	exon	83	CT-AG	CTGTGCTGTTTGTGGTGGCACAGGAGCTCGAGGCAGGTACCCTACTGTAGCAGATGGCGTCCATGAATGTGTAGAGGTTGCAG
circ_000323	chr2	161799778	161800931	-	Zm00001eb094770	161799778-161799885,161799976-161800091,161800805-161800931,	3	exon	351	GT-AG	CTGCTTCAGTTCCTCAAGACTAATCGTTCCATTTTTGTCAACATCAATGGCATTGAATTGATCACGAAGATCAGACATCTCTTCTGAGTTTAATGTAGATGCTAATGCCCTTAAAGCAAATTGCTTGAAACGACTGTATTTCACAAACTGACGCATATTATGTAATACTGATATATCCAAGGGTATTTCAGATGCCTTTCCTCCTTCTCTCACCCAATCATGTGATAATGCCTGTGCAGCAGTTAGTCTTGCACGGGGATCCTTAACTAGTAATTTTTGTACAAAATCTTTTGCACTCGAAGTAATGTTTGACCAAGGCTTGCGGCGGAAATCTGGCTTCTTTTTTAAGAC
circ_000324	chr2	23610761	23610884	-	Zm00001eb075360	23610761-23610884,	1	exon	124	GT-GG	CCCACTTTCCAAACCAGACCACAGCCGAAAACCCCCGATCATGCCGCCGCCGGTCGAACCCTACATCCCTTCGTTCACCGCCGGCTTGTCCGCGCACGAGGCCGCCGATGCCGACAAAGACTAC
circ_000325	chr2	205525426	205525629	-	Zm00001eb104830	205525426-205525629,	1	exon	204	GT-GG	CCTCCGGCCTGCGACTACCTCAAGAAGATGGAGTACGGCAGCAGCCACGGCGGCGGCGGGTGGCCGGACCACCACCAGTTCACGACAGCAGCCGCGCTGGAGAAGCACCTGAGCTCCGGCTACGGCGGCGGCGCGCTCGCGCACCAGCACCAGCACGCGGCGGCCGGAGGCGCGCCGGAGCGGCTCACGGCGAACCTGTCCGAC
circ_000326	chr2	197629144	197630205	-	Zm00001eb102300	197629144-197629217,197629645-197629714,197629947-197630205,	3	exon	403	GT-AG	CTGCAAGCTAGACCTTGCTCCCCAATCTGGATAGAGGTGACGTCCTACTGGTTCAACCCTCTGGCGTTTGCTCCCTTCCCGGCTAGCTTCAACCTCCAAGTCAACCACTGTTATAGGTTCCCTCCTGGTTCTCCTGTTCCTCCTTGGCAGGGGCACTCGCGAAGGAGATACTGCCTGAACTTCATCTTCGATGGCCTCCACATCAATGGGTGAGTTTAGGGCGCCAGGAATAGGGGCATGTGGTCCACGACGGCTCCCCACCCCCCGGGAGCTTGCTTCCACGATCACCACTAGTTTATCACCAGACCCATCTTGCGACTGTCTCCTTGGTGCACGCTTTGTACCACTAACAGTGTTCATGCTCTCTTTATGCCTATATACTCACCTCAGCTTCACAAT…
circ_000327	chr2	71453908	71454321	-	Zm00001eb085330	71453908-71453995,71454110-71454321,	2	exon	300	GA-AG	CTTTCATCTTGAGGATCCTCTTCCTGATCCCCTGGGCGCAGGCCTCGCAGTGCATGTGCACCTTCAGCACCACGGCGATCACCGGCGGCTCCTTCTTCTCCTCCGGCTTTGGCGGCTCGGGCTCCTCCTCTGCCTTCTTCTCCTCCGGCGGCGTTGGCGGCGGGATCGGCGACAGCAACTCCACCTTGCGGCCGGTCTTCTTCTGCACGCGCTCCACCACCCTCATGGGGTCGGCGGCCGCCTTCTTCCCCTTCACCACCACCTTGTGCGACTTGGAGTCGGCGACCACGTCCTCCACTC
circ_000328	chr2	26332653	26332768	+	Zm00001eb076200	26332653-26332768,	1	exon	116	CA-AA	TTCCACGCCGCGTCGTGCCCGCAGCTGGACCGCATCGTGCGCACCGCCGTGCAGGCCGCCCTCCGGAGGGAGATCGCGCTCGCCGCGGGCCTCCTCCGCATCTTCTTCCACGACTG
circ_000329	chr2	5086314	5086496	-	Zm00001eb068120	5086314-5086496,	1	exon	183	AA-AG	CTCAGCGATCTTGCACACCATGTAGTGCCCCTCCTTGCCCCATGCGTCGGCTGCAGGAGCTGTCGCCGCCGCCGCGACGAGGAGGACGTGGAGCAGCAGGAGCAAGCCCATCGTCCTCGCCTTCCTCTTCCTCTTCCCTTTGTGTGTTGCGATGGGACTCTCTCGCTCTAGCTCCTCTAGCTT
circ_000330	chr2	188992740	188993647	-	Zm00001eb100110	188992740-188992745,188993236-188993349,188993430-188993647,	3	exon	338	AT-CT	AGCATACCGTGGATTGCAATAGGTTGTGTCAAGTATTAGAGTGTGGACACAGGAAGACTGCAAAACAGGATTGTTGGCCATCTTGGAAGAAAAACGGAAATCTCCAGTGTGCAAAACAGCTTTACCATTTGGAGGCTCAAAGAGAATAATGATTGATCCTGGGCAATGGTTGGCATCAAAACATATCAAATTAACTCCAGCAATATTGAGCTTTTCATTTAGGGTCAATACATGCAATCTATCCCATGGGATACCAATCTTATGATGCACAAGACTCGCTGTAATTGACGAACAGTATATCTTCCCATGACAAAAGCTTCTAGTCAAGCCTTGATAAT
circ_000331	chr2	188992740	188993647	-	Zm00001eb100110	188992740-188992745,188993236-188993349,188993435-188993647,	3	exon	333	AT-CT	AGCATACCGTGGATTGCAATAGGTTGTGTCAAGTATTAGAGTGTGGACACAGGAAGACTGCAAAACAGGATTGTTGGCCATCTTGGAAGAAAAACGGAAATCTCCAGTGTGCAAAACAGCCATTTGGAGGCTCAAAGAGAATAATGATTGATCCTGGGCAATGGTTGGCATCAAAACATATCAAATTAACTCCAGCAATATTGAGCTTTTCATTTAGGGTCAATACATGCAATCTATCCCATGGGATACCAATCTTATGATGCACAAGACTCGCTGTAATTGACGAACAGTATATCTTCCCATGACAAAAGCTTCTAGTCAAGCCTTGATAAT
circ_000332	chr2	1583236	1588669	-	Zm00001eb065950,Zm00001eb065960	1583236-1583321,1583467-1583550,1583621-1583657,1588664-1588669,	4	exon	213	GC-AG	CTTGCAAAAAGGCGTAGAATTTCACAGTGCAACTTGGAAGTAGAGTATGCATACATTCGAAAGTTTGTCTCCACAACCACAAATCCCTCTTTGTTAGATGACGAATCTGACAAGCTTGCTGAAAGATTAGTAGCCAATTGGGTAGGAATGAACCAGCTATCCTTTCGACCCTGCTGCTGTTTGACTAGTCCTAATTCTGCAAGATCCAGATGC
circ_000333	chr2	84818852	84820733	+	Zm00001eb086560	84818852-84818897,84820448-84820733,	2	exon	332	GA-AG	CTTGACGAACAGACTGGCTGTGCTTTTTGGCATCTGATACCCCATCTCCGCCATCACGGAGTGAACGAGTACGGCTTTTCCTTCTGTTTAAGGGCCTCGATAATGAAGATGATGAGAATGTAGTCCCAGCTGAACTTCTCTGGCGATTAGGGAGTAGTGGCAAGGCCTTTGAGGCAGCTGCGGCTAATCCAAGCTGTGACATTGTCGTTCCGTGGCCCAGACAGCACAATTGAAGACCTTCTCAAACGCACAGTGCCATAAAAAGGGAAGAAAACTCCTGGAAAATCTCGGTAAGAAAGACAGCGGAGAAGGCGACGCGCGGGTGTTGGATC
circ_000334	chr2	763942	764250	-	Zm00001eb065630	763942-764250,	1	exon	309	GT-GG	CCCAACCACCACAGCCAGAAAGGATCAGGCGGCCACCCGTCAGTACCAGCCACCGCCGCGCTGTACCCGCACTCCTACGGCGGCTACGCCTTCACGGCGTCGCTCGGCACGCCGCCGCAGCCGCTCCCCGTGCTGCTCGACACCGGCAGCCACCTCACGTGGGTGCCATGCACCTCGAGCTACGAGTGCCGCAACTGCTCCTCCCCATCCGCCTCCGCCGTCCCGGTCTTCCACCCCAAGAACTCCTCCTCCTCCCGCCTCGTGGGCTGCCGCAACCCCTCCTGCCAGTGGGTCCACTCTGCCGCGAAC
circ_000335	chr2	212746858	212746940	-	Zm00001eb107170	212746858-212746940,	1	exon	83	AA-GG	CCCCGCAAGCACCCATACACGGCTGTACCCTGCCCCAACTTCCGCCGCCCTGGAGGTTGTCCCAGTGGTGATAGCTGCGAGTT
circ_000336	chr2	89445627	89446924	+	Zm00001eb086880	89445627-89445777,89446134-89446239,89446326-89446461,89446860-89446924,	4	exon	458	AT-AT	ATTGTCAAGCAACTCTAAAATCTGTAACTGAGCGATGAATTCATTAACGGCACCAACAGGATTAGCGACACTTGAAAGTACAAAACCAGACATTACATCCTCCTCCTCAACTCCGGACAATTTGACACGAACATTCTCAGCAGGTCCAGCACGACGTACTTTGCTCTCGTCCAAGTTCAAACCAATGACTTTCACATGAGACTTGTTTGGCATAATCAATAAACTGTCACCCTCTCTGATAGTGCCAGCCTCTATTTTGCCCATTACAACAGTGCCCATATCCTTATATTTATCAATAATCGGCATCCTTACTGGACCTTTGGGGTCGCGTAAAGGAATTTCAATACGGTCCAGAACTTCAAAAAGACAAGGTCCATCCCACCAACTACAAATGCTTTT…
circ_000337	chr2	35393198	35393884	-	Zm00001eb078800	35393198-35393447,35393736-35393884,	2	exon	399	CC-TG	CATTTAGCCACTCATCTTCCATCCGAGGAGGCAGTTCATTTTGCAAGACCTCGACAGCAGATGGACGGTTAGACGGGCTTGGTGACAGCAAGCTTCTTAACAGGACTGACTGACGAGGAAATTTTGATTCCCATGACAATGGCGGGTCTCCCTTCTGCTTAAGATCGGAAAGAACAAGATGCCTTTCCATCGCTGTGGCAAATGGATGCCAAAGCTCAAAAAATATTACTCCCAAACTGTACATGTCAACCTTTTCATTAATCTGTGGCCATTTCTGCTCTACCTCTGGTGCAGTATAAAAATATGTACCAACTTGACCTGTTCCATCCATTGATACACCCAGTGCTTCAGTAGGAAGATATTGGTCATGATCTAGCTGCTCCAGCTTCAGAAATTTGG
circ_000338	chr2	76735633	76735899	-	Zm00001eb085860	76735633-76735899,	1	intron	267	GC-AG	CTTTGATCAGTGAACCTCATCTTCAAAAGCACAGATTGCAGAAAAGAAAAGGCATAAAGGATGCTTACTATTTCCTTGAAACCATTGTTTTCGAGTTGTCTAGTCAAACCCAGTCGTATAGCTACCGACTAGTTGCAATTAGTCGTCGACCAGACCGACTAATCGATCCTAATGCAAGGAAAGCAGGGCAGCAAGAAGCACAATCACCATCTCAAGACAAGCTCATCTTTTCAGTGCTTGACGCAGGCGGACACATAGGAGCTAGGC
circ_000339	chr2	223027569	223027954	+	Zm00001eb111180	223027569-223027709,223027797-223027954,	2	exon	299	GA-AG	CTGTGCCTGCAAAGATGGCAATTGCTGCTGTTGCTGATCTTGTGGCAACGTGCAGGATTGTGGCTGAGACAACCTGTAGTATGGCTCCTTCAGTTCAAGTTTCCCAGTAGATGTCTGTAGGATACCGCCTTGCTCCGCACCCACACCCCACATTTTAGCTGACATTGTCAAGTATATTGTGTAGCTTTGAGCACTATGGGCTACGAGACGAAGATGGCCAGTTATTTCTTGGCCGGCCATGACATACAATGGCTGTGAAAGCACACATCGTAGTTGGTACCAGTGAGTTGTAGGGGATC
circ_000340	chr2	236991086	236991236	-	Zm00001eb115830	236991086-236991236,	1	exon	151	GA-AG	CTCCTAATCACAGCCTCGTCCAGGTCAAAAGGTCTATTTGTAGCACCAAGAACAAGCACACGCTCCTTATCTTTAGTGCGCAGTCCATCCCAATTTACCATAAATTCATTCTTCATCTTGCGCATCGCTTCATGCTCCCCTGGATTTTCTC
circ_000341	chr2	182937425	182937698	-	Zm00001eb098910	182937425-182937582,182937693-182937698,	2	exon	164	AT-AG	CTGAGGTTTAACTTCTACGATCTGATGGCCACGCCTCACGACAACAGGTTCGTTCGATAGGACTCGCTCAAGATGGCTCACTAGCTCCTTTGCCTGGCACGAGCCAAAGTCATGATCCGTGTTCTGATAGTGCCATACCAAAGCGCTCTCTTTTGGCTTTCCAT
circ_000342	chr2	22712467	22712659	+	Zm00001eb075060	22712467-22712659,	1	exon	193	GT-TG	CAACAAAAATTTCAAACTCCTTCCGCTTACGGTGCTCTTTAACCATTTCATTATGCTCCTCATCATCTCCATCCACATGATGGTCTTCGTCAGCATTTTCGTATCCCTCCCCCTCCACATCATCACCACCTTCATCAAGTTCCTCATCCACCATATCTGTCTCCACTTCAACCACGTCTTCAGTATACTCCAC
circ_000343	chr2	4077675	4078258	+	Zm00001eb067530	4077675-4077777,4077914-4078258,	2	exon	448	GA-TG	CATTTGGAAGTCAATATTCTGTCTTCCAGCCTGAAATGAGAATACATCACCATCCTCAACAGTTGAACTTTCTTTATTCTCCAGCTCTATCTTACTTGGCAGACCACCTTGCAATAGTTCATGTGCCATTACTTTGCCATTCAAATCAGCATCTCCAAATGAAGATTCCACCGGTAACTTCTCATGTAAAACTAGTGTCGGATCTTTATTAAGGACCACATTATCTTTCACAAGCGCCACATTGTTCGAACTAATGCCCTCTGTAAGTTCTAAATTTCCATCATGAAGCTCTTCAGATTTACTTTGCGCAGCAGAGTCCATATTTGGTCCGTTCCTCCCATTCACCTGGTCAACATTAGAAGCAATAGTTGCTCGGGTATCTCCTGGTGTGTCGCAAAA…
circ_000344	chr2	207790480	207792240	+	n/a	207790480-207790634,207792126-207792240,	2	intergenic	270	TC-AG	CTCACTTAATGCTTCATTAGGAAGTGTTGCAAATGTCTCTCTGTAAGAAACAGCCTTCCTTAAACGTTTACCTCGACCAAGAGATGCCTCCTCCTCTATTTGATATTGCTCCCATCTGACACGTAAAAGTTTATCCCATTCATTTTCTTCTAAACGATTAGTAGCACCTTGCTTTGATTCAGATGCCAACTCACTCCCATCATTATCAATAGGTGCAATATCCTCATTGGTACCAGGGTGGTCATTCAGCTCATCATTCCAGTCTATTGA
circ_000345	chr2	43078960	43079819	-	Zm00001eb080570	43078960-43079082,43079209-43079287,43079375-43079819,	3	exon	647	AT-AG	CTGCTTTGCAAGACTGCAGGCGCGATCAGGTGAGTTCAGAATCTCATAGTAGAACACTGAGAAGTTAAGTGCCAGTCCAAGCCTAATAGGGTGAGTTGGAGCAAGCTCAGCCAGAGCAATGTCCTGGGCAGCCTTGTATGCCACCATCGTGTTCTCAGCGGCGTCCTTTCTCTCAGCTCCAGTCTTGAACTCAGCAAGGTATCTGTAGTAATCACCCTTCATCTTGAGATAGAAGACCTTGGACTCGGGGGCAGTGGAAGACGGCACAAGATGGGTCTCAAGCAGCTTGAGGATGCCATCACAGATCTTGGTCAGCTCAGTCTCAATCTTGCCACGATAATCCTTGATGAGTGTTACTCGGTCCTCATTGCCTCGGCCCTCCTCCTTCTGCTCGATGGA…
circ_000346	chr2	7134929	7135379	-	Zm00001eb069270	7134929-7135006,7135181-7135379,	2	exon	277	GG-AG	CTTGATTCTAACTAATGGAAGTTTGGGCTCTGATCTGCTGGCAGTTGGTTGGCTACTCTTCTCAATCAGATTTCTTACAATTTTATCCAAATGTTCAAGCACAGAGTCCTGATCATTTGAGTTAACATCTGCTTCATCTTTCAACACAACCTACGAATATCAATTGTGAGATTTACTAACTCATATACGAAGCATTAAGTACGAAAGGACATGCCTCAGCATATTCAAAAGGTCTGACAGATCTCAGAGGTATTTTGGTTGGCCTGTACTGATTTCC
circ_000347	chr2	51452674	51453359	+	Zm00001eb082570	51452674-51452741,51453047-51453106,51453255-51453359,	3	exon	233	AG-CT	AGTTCCAAGGGTGAGCAAACTCTTGTTTATGTATGAACCTTCTTTGCGCCGTAAACCAGTTGTTTCAGTTTTGGAACTCTCAGACCCAGCAAGATCAATCAAGTTCAACTGAGACAACTTGACTTCTTCTGCTTCATTTTCACCAGAGGGGCTGCTCTCGATTGTCAACGTGAAGATAGTGTGACTCCTACTGCTGACAAGATTGAAGTTGTTTGATCCAACATGCCTGTGCT
circ_000348	chr2	51449286	51449693	+	Zm00001eb082570	51449286-51449345,51449615-51449693,	2	exon	139	GT-AG	CTTCTCCAGATGCTATTAGAGAGAGCGCATGTGCAGGTGATAAAACAACCTCTTCTTTGATCCCTTCCACATAAGTTCCCTGTGCATCTTCTCGAATTCTGAGATTCTGCCCTGTTGGATCTAGTAAATCATTGATAAC
circ_000349	chr2	20427902	20429807	+	Zm00001eb074430	20427902-20427998,20428085-20428198,20429441-20429807,	3	exon	578	AT-TG	CAGTAATTATCTCTTTGTCACATGTCACAGCAACAACTGCTGAACTGCGGATTGCAGAAGCAGCAAATGCTATAGCCCTTGGGAACCCATAATCTTCCGCAGAACCAGCAGATCCTTTGAAAATGCGCATGAGTGCGCCACTGGTTGAATTTGTGGAATTTCTACCATGATGGAAAAGGAAAGGTGTTCCCTGACCATCTGGAGTATTAGCCTGCCATTGGTGAAGTGCCACATGTGCTGCTGGGGCATTTACATCAACAACTACAATAGAGTCGTTTGATACAAGCATAGCACTGGCAGGAACATTGCAACGATCTGAATGTGGAAGCACATATGATTTAAGTTCACTTGGATTTCGGAATATTGTCTGTAGTTGTAAGACCTCCGCCAGTGGCTTCC…
circ_000350	chr2	199023415	199023686	+	Zm00001eb102610	199023415-199023510,199023606-199023686,	2	exon	177	GA-AG	CTTTGTTTTCTCGTCATCCTCATCTTCCAACATCTCACGCTGGGCCTCCAATCTTCGGCGCTTCTTCCTTGGTAGATTCTTCTCATGTTCTCGTCTCCTTTTCTCCTTTAGACGAAGGTCTTCGGCCTTCTTAGCACTAATAACTCCAGAGGTACTCTTACCGTGATCCAAAGATTC
circ_000351	chr2	177659183	177679908	+	Zm00001eb097650	177659183-177659297,177679640-177679748,177679841-177679908,	3	exon	292	GT-AA	TTTGTGACCTGATGCAACTGCCAGAAGCTCCCCAGTTGCATGAAATGCAATTGATGCAACTGGCCTATAGAAGACCAGTTCTGCTGTGCAGCGAGATGTTTTAGCATCCCAGAGACGAACTTCACAATCCAAACTTCCACTAGCAAGAATATCAGAACGCTGAGGATGGAATCTAACCTTTGCTTTGTTCTTGGTATTGATGTTTCATGTCTAGAAACTGACTCTGGAGTTGAAGCGCGCTTCCAGTCTTGTATCCGACATTCTGCCATCTCAGAAATTTAATAAATCCCAC
circ_000352	chr2	233434445	233435121	+	Zm00001eb114480	233434445-233434694,233434790-233435121,	2	exon	582	AG-TA	TATTTCGATGGTGCAGATTATATCCTTCGGAGCACAGAAAAGCTTTTGAATCTCCAACATTGGCAGATATAATTTGTCCATCAGCTATCAAGACCACGGTCGCTGTTGAACCAGATTCAAAATTGTTCTGTAATGCTTCCTGCATTGAACACAAAGAAGAATCATTTTTTGACGTATGAATATAATGTTACAAAATTTAATTATACAGGTGAAACATGAAACCCTCCTTGGAGAATGTTAAATCAATATCATGAACTGCCCTCATTAGTGATTCCTTCAGAATTTCCGTATGAAATGACCGGTCTAGAATGGCTGGTGATGCCCAACATGACCTCTCTGCATGGTCGGATTGGCCATGCTTGTACAGATTAAATACATTGTTAAAAATAGTAACTTCCC…
circ_000353	chr2	238222546	238222722	+	Zm00001eb116230	238222546-238222722,	1	exon	177	GT-AG	CTCAACAAAGCCCTGGTCACCTCACTACTCTGCATCTCGGCGTTGTCGTCGTCGCCATGGCCATGCACGGCAGCCGGTCAGCTGGGCGGCAAGCCCCTGGTCACCGCCGTCACCAAGGACGCGTCCACCTCCCTCTACACGGCGCCGCTCAAGGACGGCCACCCGCTCGTCCTCGAC
circ_000354	chr2	10593167	10593325	-	Zm00001eb070840	10593167-10593325,	1	exon	159	GA-AG	CTTTTGCTTATAATGGATCTCAGCTTCTTGGAGCTGTTGTTTAAGAGCTGCTACTTGTAGTTCCAGCTCCTCAGCACGCTGCTGCTCAGCTTCCAGACGATCCTCCGAGTACTTCCTAAAAGCGTCCCACTTTATCTCCCTCACAGAAGCCTGTTCTTC
circ_000355	chr2	182941857	182942060	-	Zm00001eb098910	182941857-182942060,	1	intron	204	GT-AG	CTTCTCATTTAGGACTACAATATCAAATCCAACAATCATTAAAAAATGGACCACACTCTCTTACCAATATAACACAAAAAGACAGACTGGAGGACCACAACATGATGCAAACAATACTTGAACGAATCATTTCCCTCTCACCAGTCACGAATATTAGCATACTACTACAATGTCGTATCACCTTTGCTAACAGAATGTATCTAC
circ_000356	chr2	24437924	24438409	+	Zm00001eb075630	24437924-24437977,24438328-24438409,	2	exon	136	GA-AG	CTCAATCTTCTTCAGTTCAGCTTCTATGTTTGCTTTCTTTGTGTTTTCCCATGAAAGAATAGCGGATACTTTCTTAGCAGCCTTGTTCTCAGCTTTTGTCTTCTCATTCTCTTCCCAAGCTTTGATCAAAGAGTTC
circ_000357	chr2	205756986	205759810	+	Zm00001eb104860	205756986-205757114,205759763-205759810,	2	exon	177	AT-AG	CTGTTGATCATGGAGACGATTTTCACGCTCGAGCTCTTCAATTTCTTGCCTTATGGCCTCTTCATGTTCTTTAATGAAATCTGAACTTTTAGCTGCGGTAAGCTCAGCATCCTTTTTTTGCAGAAGTGCATGTGCCCGGACCTTGTATGCAGAAAATTCACTTTCCAGTCGACTAAT
circ_000358	chr2	20873382	20873619	+	Zm00001eb074610	20873382-20873619,	1	intron	238	GC-AG	CTCAGTTTACTGTTTCTAATATATATTTTTGTTCCTAAGTTTCCATGAATCTCCTCTCAGTTGGACAAATTACAAACCACAATTGCTTTGTTGGATTTGATGACTCATCTCGTTTTGCATAGGATCGTCGCATAGGGGTTGTGATTGGGACAGGCCGTCGCCCTCACCTCAACATCCTTGACAGCTTGCGCCTTCCTTCGACCACTTCATCATCTACGGCCCATGTGCTTTCTGCAGC
circ_000359	chr2	82327930	82328777	-	Zm00001eb086340	82327930-82328049,82328259-82328377,82328481-82328538,82328663-82328777,	4	exon	412	CT-TG	CATCCCCAGTAAATTGCCAACAATGATTGAGCCAATTGGATCATACATAGCATTTCCTGTCATTTGAACAGCTACCAAAGATGCTGCAGCAATAGCAAGGCCTGTAACAGCAGCACCATCTTCAGTCATAACAGCAACGGAAGTTGGATCATGACCACGCCAGATATAGTCCCAGATACTCATTCCCTCTGCTTCTGCACCTTTCCTAACAGCCTTTATAGCAACAAGCAGTGAAGCACCTTCAATTAGGAAGGACCCACCAATCACTAATGCAGCCCAGTGAATATTCTCTGGAGGATGAGAATTCCATAAATTTTGAACTCCATGCACAATTGTAGCACCGGAACCCAAGCAAAATATTCCAACTGCAGATATGAGAGACCATACAAATCTTTCCTT…
circ_000360	chr2	222743567	222743791	+	Zm00001eb111100	222743567-222743791,	1	exon	225	GC-AG	CTCACTCTTGGAATTATTTTCCCCATTTGTGTCATAAGGCAAAGCTTCTAGACCAGAAATTTTTCCCATGTGGAAAACAGCTGAAGCTCCTTCGTTTATAACATTGCTAATGCTACCTTCAAAGTTAGAGGCATTATATTTACTCCCAGATTTTATTTTCTTTTTTTGCTTCCTATCTGATATTAGGTCTTTGTCATTAGTTGTATTCCTATCTTCTAAAGTTGC
circ_000361	chr2	78098279	78099248	+	Zm00001eb085950	78098279-78098328,78098430-78098546,78098626-78098762,78099196-78099248,	4	exon	357	TC-AG	CTGAAATACCAGCTTGATCATTTGTACATGCAATGCTCTGCTGGCTACAAGGTCTCAGGTGTGACGAAAGGTGAACCGGTTTCATGAGTCCCAACTTCTGACTGACTAGACTCCAAAGGGTACTCCAATGTGCGCCGCCGCTTTGATTCCCGAGATTCCTCCAGGTCCAGGGTCTCCTTGCATGTGATATCATCAAGGTCAGCGAAGAAATCACGGCAGTATCTCAATGGGGTTTGATTTCCAAGCAATCCCAACAGCTCATTGTCATCTTGATTGAGGCAATCCCACACAAATTTAGTAGCATCTGCATGACTTGAATCGTTAGGTTCACAATGCTGTTCTGTCCAATCCCAAAGA
circ_000362	chr2	145308263	145308624	-	Zm00001eb092260	145308263-145308624,	1	exon	362	TG-AG	CTCAGTAGCAGAGTGGACTTCTCCATGGTGAATCCCAGGCAAGTGTGACGAGTCACAGCTCTCCTATAATAAAATGGATAAATTACATGATTAATTCGGATATTGTACGACCTCTTAGAGAGGAAGTTTCAATCAAGCACTCATTGCAGATATACATATTCTTCAGAAGACCCTGAGTTATTTCTTGAGTGGCCGAAACCTGGAGATACTATTGTCTCAGTCGTCGTTGTTTTCATGTCATTCAGCATGTCAATGATGCAACCTATAGTCGGTCTTTTATGTTGATCGTCTTCCAGACAGAGTTGTGATATTTGAATGCATCTGTTCAATTGTGGGCAGTGTACATCTTGTGATTCATGCCA
circ_000363	chr2	239949016	239949490	-	Zm00001eb117070	239949016-239949204,239949333-239949490,	2	exon	347	GA-AG	CTTGACGTGTGAGCTGGGGAAGGCGGAGGTCCGCAGCGTTTCCTGTGTCTCGTCCATCGGCTTCCGTTTCGGCATGCTCAGGATGAAAGCGGCTTGGTCGTTGGTGGCTGCCGTGGAAGTTATCCTGTAGCCGCTCTCCCAGCGCCGGTGGATGCCCTCGCTGGGGTACAGGAAATCCAACTCTACAACCTGAGTAGAGAACCCTGAATTCCTTGACATGACTACGCCCCAGCGATTCCCAGCGGTGGCCATGGATGTCACATGGAACCCTTCTTTCCACTTCTTATTGATCCACTTGTAAGGGAACGACTCGCTAACCTTGTATGATTGTTGGGTGTAAGGAGTTC
circ_000364	chr2	205340763	205340906	-	Zm00001eb104770	205340763-205340906,	1	exon	144	AT-AG	CTCCTTTCGTGAGGTTGTTGCAAGCGGAGCTGGAGGAGCGCTCGCTGCTGGAGGGGAGCGAGCTCGTGGTGCTCGTCTTCGCCTGCTGCTTCTCCTGCTCCTCATCTCCGCGTCGATCTTCTTCTCCTCCCGCGCGCTGCTCAT
circ_000365	chr2	113619493	113620176	+	Zm00001eb088910	113619493-113619540,113620027-113620176,	2	exon	198	GT-TG	CACTGGTTTCGTCATGAACTTTATAGCATCCACCAACTTCTGCAAACCAAACTGATCAACTGGAATAGGCGGAGGCCCTAGCCCTCTTGCATGCACCCGGTCGCCCCAGAAAGGTTGGTCACCAAAGAAAGGTACAATAGTCGTAGGACACGCTGCTTTGAGACCTGCGGCTGTTGTTCCAGCGCCACCATGATGCAC
circ_000366	chr2	14541959	14543116	-	Zm00001eb072560	14541959-14541964,14542867-14542939,14543030-14543116,	3	exon	166	CA-CG	CGGCAACTCAAGATCAACAATCAACTTGCGCAGGTGAGAGTTTTGTGGATTCTGAGCAAATAGTTGGACAATGTTGAGTCTCATTATTCCAAATGAAGAACTAAATTCATCCTTGTCTATCCGCCAAATTTCACGTGTCAGATCCTCTTGCTCTGACAAGGAATTG
circ_000367	chr3	143025528	143027579	+	Zm00001eb139130	143025528-143025594,143025685-143025777,143027242-143027385,143027491-143027579,	4	exon	393	TG-TG	CATCCATCCCAATCCTCAGTCCATATTGTTGGCTTGTTGTAGGAATTTGGTTTGAACCCATCACAGTAAAAGGCATTGCAAGTATTGAGAATTTGTTCTGGAGCATCTGTTTGCCTACACATTACCCAAGGAACACCAGTATCAAGTGCAAGTGCCATCTGAGCTGCCCATAGCATGTATCTCTTCCCTGCTTGACCATAATGGCCTTGAATGTTACCGTATTCATTTTCAATCTGCTGCAGTATAATGGGACCACCTTGCCAAGAATAAAGCTTCTCCTCTTTCATGATATCTACAATTTTTGTCACAAAAATCTGCATTTCAGCCTTGTAGGGTTCATTGTCAGTGCGGAATTCTATCCCAGGGACATCGCGCAACCAAACTGGGAAACCA
circ_000368	chr3	143025528	143027579	+	Zm00001eb139130	143025528-143025594,143025685-143025777,143027242-143027385,143027466-143027579,	4	exon	418	TG-TG	CATCCATCCCAATCCTCAGTCCATATTGTTGGCTTGTTGTAGGAATTTGGTTTGAACCCATCACAGTAAAAGGCATTGCAAGTATTGAGCTGCCAAAAAGGACAAGGCAGTAATAATTTGTTCTGGAGCATCTGTTTGCCTACACATTACCCAAGGAACACCAGTATCAAGTGCAAGTGCCATCTGAGCTGCCCATAGCATGTATCTCTTCCCTGCTTGACCATAATGGCCTTGAATGTTACCGTATTCATTTTCAATCTGCTGCAGTATAATGGGACCACCTTGCCAAGAATAAAGCTTCTCCTCTTTCATGATATCTACAATTTTTGTCACAAAAATCTGCATTTCAGCCTTGTAGGGTTCATTGTCAGTGCGGAATTCTATCCCAGGGACATCGCG…
circ_000369	chr3	135896671	135897500	+	Zm00001eb137900	135896671-135896676,135897246-135897500,	2	exon	261	GG-AG	CTCATAGTCTTTTTCTGTTAGTCTCTCTAAGAAAGGAGCATTTATGGCACTGCTCATACTATCTGCAGCAATGAAGTAAATGTCCTTCTGCTCAGGTTTCATGTTTTCCACATATTCATCCAAGCTAATTAATTCATTGTTGCTTTGAGAAGAGAAGAAGCGCAACAAAGGAGCAATTCTCTTGTGATTTTCCTTATCTTCCATGGCACCCAGCTTTAAAAATTTTCCAAAGTTCTCCCAGAACCTTTCATAATCCTCACC
circ_000370	chr3	19959300	19959478	-	Zm00001eb124810	19959300-19959478,	1	exon	179	GT-AG	CTTTATTCCAATCCAGTCCTATTACCACCATCCTGTCCATCAGCAGGCACCCCAGACCATGCAAAGGCAGCAACAGGCACCTACGTTCGACCCAAATACAGGGATGTATTATGTTCCTATGCAGCAGAACGCACATCAGGCATATGGCGTGCCTCCTGGTGCACAAGTCACTTTGCCAC
circ_000371	chr3	225457301	225459708	-	Zm00001eb160220	225457301-225457351,225457441-225457514,225459438-225459501,225459591-225459708,	4	exon	307	GA-TG	CAATTCTTTTACAGCAATGAATTGTTCATCAGTCAAGCGACATTGCCAGCCCGAATGAATATGCTCTCTGATGCATTCAACAAAGCCACTTCCCCCGATGCCTTCTGCGTCAGACTCAATCAAAGCGCCCTCTCTCTTGGGCTCAGACTTTCTGCCTTTGGGCCCCCATTTACTCGGATAGAAGGAGAACTCGGTACTTGCTTACTAGCCCCACTAGCTAACGCTAGAATCGACTTACGTTTTTCTTCTTGTTCTTCTGTTCTTGCATTTGCTGGAAACCTCTTATAGCAGTGTCTATTGTCTAGTC
circ_000372	chr3	204171980	204172732	+	Zm00001eb153530	204171980-204172042,204172130-204172228,204172393-204172470,204172664-204172732,	4	exon	309	AG-AG	CTGTCTAGAATAATGCTCTGCATCTCTTCTCATTCCAGCCATTTCAACTCTCATTTTCTGTAACTCAGCCTCCAACGATGATATCTTTGCTTCTGCCTCTCGTTGGCTTTGGCGTGCACGCTCAACTTCTTCCTGCCAAGCCTGCATCTGAAGAACTTGATTGGCTTCTTCTGAAGGTTTTTTCTGTGTGCGGCGGTTACGAGCTTCCATCTCCTGCAGTTCTTGTTGCAATGAAGCATATTCAACCTCAAGCACAGCCACCTTGTGCTCCAATTCCAGCACTCTTGATGAGCTTTGATCAGCAGCTCT
circ_000373	chr3	9752893	9756998	-	Zm00001eb122270	9752893-9753024,9753167-9753232,9753345-9753620,9756876-9756998,	4	exon	597	GC-TG	CATGGTATCCCCATTGCCACCTCCACTGGCATCCAGAGAGCCACGCCAATAGCCTCTTAGTTCAGCTAAGCCAGGAAATGCTATATCTTCCATTGTGTCATCATCCAACCAATCATGATAAATTTCTAATGCCTTTAGCTGATCATTAAGACTTTCAGCATTGAACCCAACAGAATGCAGACATTGCATAAAAAGTTCCTTTGATCTCGAACGGATAACTGGGTCTGTACTCCGTGAAAGAAGCCTTGCTAAAGGAAGCATTTCAGCTACTTCAGCACCAGGAACCTCTAGTCTCATCCTCCACCTGCCCATCGAAGACATTATGCTACCAAGATGCCCTCCCATTGCTTTCTCTATGAACCCATTACTCTGACTTTCCACAGGAAATCTATCACGCGT…
circ_000374	chr3	29954949	29955909	-	Zm00001eb126630	29954949-29955053,29955130-29955185,29955269-29955346,29955904-29955909,	4	exon	245	AG-AG	CTGCAACGCATACGTGAGACGAATGTTTTCCTCAATAATATCTTGCCTGTATGACAAAGCTTTTGAAGCTGCATCAATTAAATCATGCTGCTGCTGGTCAAATGCCATACGCATATAAGCAATCCGTTTTTCTAACTTGTATTTATCATCGAGTATTTGAGCTTCACAGAGTAATCAGCAAGATGTTTTCTTAATTGTGCAATCTCTTCTTCCCCTTCTTTGACCTTAACAGTAAGGTCTTCCCT
circ_000375	chr3	157125520	157125645	+	Zm00001eb142220	157125520-157125645,	1	exon	126	GC-AC	GTGGGGGCGGGCGGCGACGAGCCCGGCCTTGGGGGTCTTGCTGAGGTAGAGCAGGTAGGACGCGTGGTTGGCGTCGGCGAGCGTGAACTCGTCCCCGGCGAGGTACTTGTTGCGGGCGAGGTGCGC
circ_000376	chr3	223829148	223830142	-	Zm00001eb159710	223829148-223829190,223829343-223829398,223829492-223829598,223830020-223830142,	4	exon	329	GA-GG	CCCGCTGATGAGGTAGAGTGGAGAGAACCTCAATCGCTGGAAGCAAAAAGGCAACTGTTTTCCCAGTTCCTGTCTTTGCCTTTGCAAGAACATCCTTGCCTTGAAGAATTATGGGCAGAGTTGCCTCCTGCACCTCAGTCATCCTTTCATATCCAGCATCTTTGACGGCTTTCATCGATAAAGGGGAAATAGCACATTGATCAAACCGTGTCTCACTGAGGTACGAGCCATCCACACCTCCCGTCTCGCCACCATTCTTCTCCACTCCCAACTTGAGAGCTTCATCTTCCTCGTCCTGCTCCACCTTCTCGTCGTCGATAAGTTCTCTC
circ_000377	chr3	26873580	26873832	-	Zm00001eb126070	26873580-26873832,	1	intron	253	GT-AG	CTAAAAACGAAAGACCGCCACCACAAACTTATGTTGAGGGACAACACACCCCATGTATCACCTTACAATCCAAGCATGCTCGTTTATCCTTCTTGTGAGGACAAAGTCGATCTGACTAGTGTGTTCGACTCTACTATAAAGTCACTAAATGGGAGTCTCTTCCTAAAGAAAGTGTTGGCATGGTTAGAGCTATAGGTCAAAAGCTACCGCAAAGTCCAACACTTCCTCTCCCGCCTGATTCCTACTACTATAC
circ_000378	chr3	228204690	228205026	-	Zm00001eb161110	228204690-228205026,	1	exon	337	GT-GG	CCTCCCCGTCCTCCTTGTCCTCCTCCTGCTCGCGCCGCACCTCCTCGCCACAGCGCCGGCGTTTGCTAGCCGCGGCCTCAGCGCGTCCGACGCCGCCCACATCCGGAGGCGCCAGCTGCTGCAGTACCACGGCGGCGGCGCCGGCAATGGCAGCGGCGTGGTCGTCGACCCGTCCTACGCGTTCCCGAACCCGCGCCTCCGCGACGCGTACGTGGCGCTGCAGGCGTGGAGGCGCGCCATCCTCTCCGACCCGCACAACGTGACGGGCTCGTGGACGGGCCCCGACGTGTGCGCCTACGCCGGCGTCTACTGCGCGCCCTCGCCGCAGGACCCCGAC
circ_000379	chr3	229627901	229628035	-	Zm00001eb161690	229627901-229628035,	1	exon	135	GT-AG	CTTTTCGTCATGTGGTCATTTTTGGCAAAGTCTTGTTTGTCTATCATCTAACAGCCAGAATACAGAAGTCCAACATGGGTTTCATACAAGTCATTTCCAGAGCTTGAGAGTCCTATCATGGCTTACTGAGGCAAC
circ_000380	chr3	63178861	63185889	-	Zm00001eb131230	63178861-63178960,63183898-63183957,63184602-63184684,63185840-63185889,	4	exon	293	GG-AA	TTATTCCCTTGACCAATTTGAAAATCATGTGAAGATCATCTATGTTCTCTAAATCCTCGCACATTCTGAAAATGTCCACTATCTTTGGGAAAAAGTCATTATCTTGTGTTATCAACTCTGCCACGTGCATCTGATCTGTAATGCCAGCCTCCAATACAGTCTTCAAAATAAAAGGAAGATTAGACAACTCAACAGGAGGAAGCTCCCTGAATTCGCCGCCGTTGGCAGAGCGGAATGAATCATCACCAAGGTTACTGAACTGAAGGTTTCTCTGAATATCGCATATGTGTTCC
circ_000381	chr3	145836330	145836670	-	Zm00001eb139740	145836330-145836451,145836527-145836670,	2	exon	266	GT-TG	CATGAGTCGGCCACCGGCGTGGTCTTGGCGGCCGAGAGGATGGCTTGGAGGCAGTGGGCATGGCCGTAGTAGGCCGCGTGGTGGAGGCATGTCCGCGCGTGTACCGAGTCGAACATGAGGATATTTGCTCCGGCGTCTAGCAGGCTGAGCACGCAGTCCGTCCTGCCGTGCATGGCCGCCAGCATCAACGGGGTCTGCTTCTTCCGGTTCAGCACGTCCACGTTCCCGCCGGCGCCACCGTCATCGAACAACAACATGGAGAGCAC
circ_000382	chr3	191135137	191136610	-	Zm00001eb149780	191135137-191135208,191135301-191135375,191135463-191135531,191135633-191135704,191136536-191136610,	5	exon	363	GG-GT	ACTTGCTGCAGTCCGGGTAAGGTAAAGATCCTGTTGGGAATCTGACCATACAGTCCTCCAGAAGCTATTGCTACTGAAGCTAGTGTTTTCAGTGTCAGCATCCAGGTTGGTATGGCAGACGGATCAAATGAATTGTTGCTTAAATCAACCACATTAAGTTTTGTCAGGGTACTGAGATCTGGCATTGTTCCACGCAGCTGGTTGCCTGCAAAATTCAGTACATTGAGGTCAACTAGGTTACTGATATTGGTCGGAACTGCTCCTGTGAATTTATTATTGTCTAATCGGAGTGTTGTGAGCTGCCTGAGGTTGCCAATCGAAGTGGGTAGTGGGCCACTAAGACCACTGTTGGAGGAGAGGTCC
circ_000383	chr3	203549003	203549610	-	Zm00001eb153360	203549003-203549106,203549483-203549610,	2	exon	232	GT-TG	CATCCGCGGGTTGTGGAAGCCAACCTGGCCGACATCCATGGATGGGGACTTCTTGAGATTAGCCCAGGGCGTGTAGATCACCTCGACGTTGTTCATCTTGTTCCCTTGAATGGAGTGAGCCTTGACGAGCTGCGCACAGTCCTCCAGGAGGGCCTCGCTGATGGTGTGTATCGTCTCGCCTTTCTTTAGCCTCAGGTAGACGTGTGCCGAGGATACCTTGTCCACATGGAAC
circ_000384	chr3	7316873	7317259	-	Zm00001eb121480	7316873-7317259,	1	exon	387	TC-AT	ATGATCTCATTACCTCGAAAAGGTACAGGTCATGGCAGAAGCCTCTCGAAAAGATCATGATGAAGTATGTAGAACTCTGTGTTGACCTGAGGAAAGGCAGATTTGCAAAAGATGGTCTTATTCAGTATAGGATTGTCTGCCAGCAAGTAAACGTGTCATCCTTGGAGGATGTCATAAAGCACTTCATGCAGCTTTCAAATGAGAAAGCTGAACAAGCTAAGAGTCAGGTCGAAGCACTGGAAGATGCTCTGGATGTCGAAGATCTTGAAGCAGACAAGCGTCCCGAGGACCTCATGCTCAGTTTTGTCAGTGGGGAGAAAGGAAAGGACCGATCAGATAAAGAGGTTGTAACTCCATGGTTTAAGTTCCTCTGGGAGACATACAGGA
circ_000385	chr3	121295446	121295953	-	Zm00001eb135750	121295446-121295512,121295597-121295692,121295773-121295953,	3	exon	344	TT-GG	CCTCCCGTTTTCCAAAAGCATTCTTACAGCCCTCGCATCTGCAACTTATGGAGCATCCCACACCACCCTGAAAACATTCACAGTATTTTTTTAGACATGACGACTTCTTGCAATTGCATCCCCTTTTGTGACGAGCTGAAGCAGGAGTTTTATTGGAGAAGTCCCTTAGTTCCAGACCAGGCTCAGATGTATGAATTACTTTAGGAGCAAATGCTAATGGATTGCGAGATTCAATCTGTTGCCGCGTAGATAGAACAGTTTCCGTATGACTCTGGTTGTTCATACAGCCGATACACGAACAAGGCTCAGAACAATAGACTCCAGCAGCAAAACACTCACAGTAA
circ_000386	chr3	156996833	156999069	-	Zm00001eb142190	156996833-156996982,156998958-156999069,	2	exon	262	GG-AG	CTGGAACCTTTTCTTTACAACATCAAGTGGGTGGCATGCAGCCTTTGAAAATGTCCCAGCAGCAAACCCACAAAGAAATAGCTGGAAACTTGATACAGAATCATCCTCGCTTCCAAAGTTAAGATGCGAATATTTATATCTGTTCCATGTCTGTTTTAGATGAACCAGAAGCAAATGTTTTTAGTTTGTGTAGGACAGTGAATTGTATAGCTGTATATGGCATATACATCAACAAAGCCGGTACATTTCCTCTCCAGAATCC
circ_000387	chr3	159453467	159454027	+	n/a	159453467-159453565,159453810-159454027,	2	intergenic	317	GT-AT	ATCAGATGTCAACCTCTTGTATCTCTTTCCAGTCTCATGAACTTGCTCTTGTTCAATGTCTTGGTTTTGCACACCAATGTGCACAGGATGGGTGCTGCTGCCAATAGTTTCAGCCGTTGCATTTCCATCTTCACATGGCAAAGAAGAGCCCGTCTCAGATGCTGCTGCACTTTGACTTCTACTAGCAATCACATCCTGACCTGTGTGCCTCTGCACTCCTTCTGGAGAAGTCCTCACAGCAGGTACCGGTGGCGGCTCTAGCAATCGACCTTGGCGCAAGTTCCTGGAAGCATCTCCCTCAGTGCGTGGCTCCATAC
circ_000388	chr3	134825533	134825762	-	Zm00001eb137740	134825533-134825762,	1	exon	230	GA-AG	CTCAGCAACATCCATACAAAAATCTTATCTTGAACCATCAATAAAGAACAAATTGGGTAACATGAACAATTTAACATAAAACGCCAAGTCGCCAATCGCAAGACTGATGGATCGATCTAGACAACCTTTGGAGGCGCTTCCAGCATGAGTTTCTCGATGAGGTCTGCAGCGTCCTGCACCGTCGCGATGTCCTGTGCGCTTGTTTCGTCGACGGTTATGTTGAACGCCTC
circ_000389	chr3	233856952	233862076	+	Zm00001eb162910	233856952-233856957,233860091-233860189,233861608-233861655,233861782-233861874,233861969-233862076,	5	exon	354	GA-AG	CTTGATGGAATACAAAAGATCTGAAAAATTTTCACCCAAACGCTGGCGCTTCTTAGCCTCCTTTTGCTCTTTTTCCTTGAGCCTTTCAAGCTGATCATCATAGATAAGCTTGATGTTGATGGTTGATATTCCTTTAAGAGCATCATCCTCCAGAATAGCAGTTTGGAATTCCTCTAATGTCCATGATGTTGTCATAGGAATCTTTCCAGATTTCACCACTTCTTTAATTTGGGTCTTGTCTTCTTGATACTGTTTGTCAAGTTCCTCGATCACGTCATCAAATAACTCTTTCGGTGTAGAGCCAGATGTGTTTGACGCTACAGCCAAGTAGGACTGTGAATCTTTTATGGCCTC
circ_000390	chr3	204446562	204446927	+	Zm00001eb153630	204446562-204446927,	1	exon	366	GT-TG	CAGTCAGCACAACCAAACGCCCACGCCACGAAGCCGCCGGAGACAATGGCGCCACCGCGGCGCGCGTGCCCGTGCGCGCGCGCCTGCTTTGTCCTGCTGCTCGCGCTGCTCCCCTGCTGCCGCGTGCGCCGAGCGGGCGCGCAGTCGCAGCCGGCGGACGACAAGCATCTGCTGCTCCGGATCAAGAGCGCGTGGGGCGACCCGCCCGCGCTGGCGGTATGGAACGCCTCGTCCCCGGGCGCGCCGTGCGCCTGGACGTTCGTCGGGTGCGACACGGCCGGGCGCGTCACGAACCTCACCCTCGGCAGCGCCGGCGTCGCGGGCCCCTTCCCGGACGCCGTCGGCGGCCTCTCGGCGCTCACCCAC
circ_000391	chr3	203933446	203942721	-	Zm00001eb153500	203933446-203933480,203942521-203942604,203942689-203942721,	3	exon	152	GA-AG	CTTTCACGCCTTGAGAGTTCAGTTGTCTTTCCAAGATCAACTTCCTTGGCCTTTATATTCTTCACTTTTACTAAGTTCGGATTTTCAATCTGAATAATACCCTCAGTACCTTTATGTTTAGGTTTGTCATCAGACTCGTCTTCAGATTCTTC
circ_000392	chr3	183022263	183022870	-	Zm00001eb147480	183022263-183022360,183022454-183022637,183022758-183022870,	3	exon	395	TG-GT	ACTGTGACGGCGTGGCCGCCGAAGGTGTAGAGGATGTTGGTGGCGCCGGTGAAGTAGAGCACGAGCTTGGTGGGGCCGGAGTGCGCCACGCCTTCGGCCTGGCCGTTGAGGAGCGCGGCGATGGCGAGGTACCACGCGGTGTAGGTGGTCATGCCGAGGCCCAGGAAGGACCAGATCCGGTAGTTGTGGAAGGACGGGATGAACACCGTGGTGGCGCAGCAGGCGCCGAAGATGTACGTCCATGTCCGCTTGTCCAGCCGGTCGTTGATGTAGTAGATGTTGCTCGCGCAGGCGATCAGCTGGATGACGGAGCCGAACAGCAGGAACGTGCAGTTGAAGGCCAGACCCGCCGCCTTCCAGTAGGGGCCCAGCAGCCCGTCCAGCACCTCGAACCA
circ_000393	chr3	115261970	115346501	-	Zm00001eb135090,Zm00001eb135100,Zm00001eb135110	115261970-115262043,115262149-115262232,115346496-115346501,	3	intergenic-genetic	164	GG-AG	CTGGGACAACACCCTTTAGACTTTAGACTCTTGAGGTGTTCCTTCGCAAGGAAACTCTTATGTTATTCTTGTTTCCAAGCGCTGGTATCAGAGAAGAATAGATTAACTGCTTCGTTCTTCTACAGACTAGTTTCCAGCCTCCTGTAAATAGAGTTCCCCGTACC
circ_000394	chr3	115261970	115346501	-	Zm00001eb135090,Zm00001eb135100,Zm00001eb135110	115261970-115262232,115346496-115346501,	2	intergenic-genetic	269	GG-AG	CTGGGACAACACCCTTTAGACTTTAGACTCTTGAGGTGTTCCTTCGCAAGGAAACTCTTATGTTATTCTTGTTTCTAACATCACCAGAAAATTAGCATGAGTGAGAGGAGACACAGGTTATTATATTGCACATACATGAAAGTGAGCTATATAAGATAGGATGATGTTATATAATATACCCAAGCGCTGGTATCAGAGAAGAATAGATTAACTGCTTCGTTCTTCTACAGACTAGTTTCCAGCCTCCTGTAAATAGAGTTCCCCGTACC
circ_000395	chr3	208126147	208126546	+	Zm00001eb154820	208126147-208126218,208126301-208126546,	2	exon	318	AA-AG	CTCCCGAGCCCAAAACGGGATTATTCGTCGTCGTCGTCAGTATTTCTTCTTTCACAGCTTATCTATGTGTCAGTGGCACTGCACAATTTCGTGTGTGCAGCCACAGGCCCTCAGGGAGTTCCTGAGACCACGTACGGGTGTTTATACACATGTTCAAGATGTTAAGATCGCAGACTTGTGCCAGTACTGCTCGAATCTCTGCCTCGCATACTCCTTGTAGTCGAAGTCAATGTCGTTAACATGGTCCGAAATTATTCCCCAGAGGCCCCATACTAGATGGCTGGCGAGCGTGTGCTTCTCAATGCTTTGGAGCAGGTT
circ_000396	chr3	77662447	77663486	+	Zm00001eb132150	77662447-77662625,77663263-77663486,	2	exon	403	GA-GG	CCATCAACAAGGTCCATTAACTTTGGGAATAACTGTCTATCCCGAAGCCGATTTATTTCTGAAACTGTTGAATCCATGGATTGCATGTCTACAATGTACCTTGTGTGCAATTGGCTAACAGCAGCTTTTGTCTTCTCCAAGGTTTCAAGTTTAACACCCCGTTTCTTTTGCTTCTGCAATAGAGACACCTTCTTCTGATAATCGGTTTTCATAAGCTCCCCAGCCTTCACTTCGTCATACAGTTTTTTCTCCCAAGCAAGCATTCTATCTAGAACTGCAGCATGAGTTTCAAATCTATCATCAATCTCAAAATTATCGTTCAGGTCCTCATGGTCAGGTAAGTTCTTGAAGGAGCGGTTCCATGTGATAACGTGCATAATTTTTGTAGAGTGGTCGATA…
circ_000397	chr3	229360428	229360669	-	Zm00001eb161500	229360428-229360669,	1	exon	242	TT-AG	CTCCACCACCCGTCCACCTTCACCACGCTCGCCATGGACCGCAAGATGAAGCGGGCCGTCATGGACGACCTCGAGAGGTTCGTCAGGAGGAAGGAGTACTACAGGCGGATCGGCAAGGCCTGGAAACGGGGCTACCTGCTCTACGGCCCGCCCGGGACCGGCAAGTCCAGCCTCATTGCCGCCATGGCCAACTACCTCAAGTTCGACGTCTACGATCTCGAGCTCACCGAGGTCAACTGGAA
circ_000398	chr3	13723946	13731468	-	Zm00001eb123340	13723946-13724089,13724168-13724224,13724290-13724345,13724434-13724569,13731179-13731266,13731362-13731468,	6	exon	588	GG-AG	CTCAGTTTGTTTCTTGTTCTTGTCAGCTTCTTCTGCTTGTTTCTTATCCCATTCTTCCTTAGCTCTCTGGTTCATCTGTAAAATTTGACGACCAACATCTGAAGTAATAACTAGTCGATGTCCGGTCTTTTCAGTATCGATTCTCTGTTTTGAGACTCGTATGAGAGTACTTATGAGTCTTCGCAATCGCTCCTCCACACACATTGATAAACAATATTCCACATCGTCACTAATATTTTTCAGATCACATTTCTGAGCGATTTCTGCTAGTTTCCTCAGAAGTGGACCCTTACGTAGGAAAAGATTTTCTTCTTCTTCCTTTGCAATTCTTCGTGCTTCTTGTGAGGCAAGGCTCTCTTCCTTAGGGGCAGACAGTAACTGTTCTTCCTCTTCCCTAAT…
circ_000399	chr3	19958308	19958662	-	Zm00001eb124810	19958308-19958662,	1	exon	355	GT-CT	AGCGCCATCTCCGGCTCCCTCGACGGTATCCCGAGGGGAATCTCCACCGATTCAGCCTCCGTCAACTGCCTTCTCGGCCTCGAGGACGACTCCTCCGTGCACTCCCGTAGCGGAGTAACCAACTCGGCTCCCACGGAGGACCAGCGCGCCAGCCAGCCGAAGCTCCAGGCGGGCGCCGCCGCTGCCGCCGTCGGTACCGGGAGGCACCCGCACGACGTCCAGTCCGTGCCAGACTCGCCGATGCTGGATAAGAACTCCTCGTTCGGGTCTACCTCCTCGGCCCCGTCGCTATCGAATCTTCCGCCTATACGCGTGCGGCCGGAGGACCGCCCGTCGGACGCCCGCATCATGCAAC
circ_000400	chr3	224963788	224966353	-	Zm00001eb160060	224963788-224963852,224965958-224966353,	2	exon	461	AT-AG	CTTGTCCATCACTGCACTGAAAGCGTCCATGTCCTTGTTGTTCCCCTGTTCCTCGCTTCCTCGCTCTAGTTCCTTTGAGGAACGGCTGGCGTCGGAGTGACTCCCGAGTTCTTCTTTGGCTTTCTCAAGGAGGCCTGAGCCCTTGTGCCGGATCGTTTCCATGCCCGACTTCACATCCCCTTGAAGCTTCTCAGTCGCCGTTTCGGCGTCTACAGATTAACCCCAAACAAAGGTCAGGGAGCAGGGAAATTTTAAAATCCTGCATATATACAAAACCTAGGCTAATCATGAGGGTAAATAGCTAGCTAACCCTTCTTGGCTTCCTGCAGGCTTCCTGCGAGGGCATCAAGCCCTCCCTTGGCACGATCGAAAAGATCATTCTTCCCACGCCCATCTTTC…
circ_000401	chr3	2579250	2579456	+	Zm00001eb119510,Zm00001eb119520	2579250-2579456,	1	exon	207	GC-CC	GGAGTCCAGCAGCAGCGGCGAGGCCTCGACGTGCCCATCCGCCTGCTTCACCGCAAGCTCGTCTGGGACCGCGTCCTCGCACTCCTTCTCTGCCTTGTCCTCGTCGGCGTCCACAGCTTCGTCGTCGGCCGCCGGCGAGGAGCGGCGGGACCTCACCTGGCTGCTCGACGCATTCGCCAGCGCCACCTTCGACCAGATCGACTCCGC
circ_000402	chr3	228712849	228714960	-	Zm00001eb161310	228712849-228712900,228714866-228714960,	2	exon	147	GT-AG	CTGCTTGACACAATCAAGCTCCTTCCAGAATGACTCATAGCGACCTGGTAGGCTTGCGAGGCGGGTGTAAAAGAGCTGCTTGGAGAGCTCCTGGCACTTCTCGACGGTGGGGGGCTGAACGACGTACTGCTTGTTCTTCTCCATTAC
circ_000403	chr3	33477857	33477970	-	Zm00001eb127180	33477857-33477970,	1	exon	114	CG-GT	ACGATGGTCCTGTACTGGCGCATCAAGCCCGGCCACGAGCGGGAGCTCGCGGCGGAATCCGGTTTCCCGACCTTCTCCAGCTACGGCGACCCGCACGTGTACAGCACGCCGTCG
circ_000404	chr3	143455912	143456025	-	Zm00001eb139270	143455912-143456025,	1	exon	114	AT-AG	CTGAGTCTAGGGGTTGCACGGTAGATATTTTAAGAGGAATATCATCTAAGAGACGTAACTGCTTAGCAATAGTATCAAAAGCTTCAAGCAAAGCTCCAGAAGACGAGACCGGAT
circ_000405	chr3	116223210	116223512	+	n/a	116223210-116223512,	1	intergenic	303	CT-AG	CTGTACGACCCCATTCTTCGCCTTCTTCCTCGGCGCCGGCGTGATGCCCGACCCATGGAGCGACGGGCGACGTTTGCTGCTCGACGCAAGGGCGGCGTCGCCCCATCGACTAGCGGACACCGACACCGTCAACTCCCACCGTGCCGCGGCTGGCGGACCCAGCACACCGTCGAGCAGTGTCGCGACCGAGTGCTTCAGACCCTGCGCTGCTACACCTCGCCCCCTGCGCTCCTCTCGCGTTCATGCTCACCCCGAGGAGGACGGTGACGAGAAGCCGAGCGAAGGAACGCACCGAAGTAGCAG
circ_000406	chr3	208773594	208774422	+	Zm00001eb155010	208773594-208773737,208773821-208773966,208774063-208774226,208774364-208774422,	4	exon	513	GT-AG	CTTGAGTTGTTGTTCCGAACAGTTTTCGCATTCCCAAAGGCTTCAAGAACTGGATTAGATTCTAATACTTGCTGTTCAACTGTCCTCTCTCCTGTTCCAGATCGCCCACCCAGATATGCAAGATATCCCATCAACAACTTCGTAGTTTCAGTCTTACCAGCACCACTTTCACCACTGACCAAAATGGAGTTACTCTTTCCTTCATTTATCATTTGCCTGTTTCCTGTAAGAGACGTCAGCTATTGCAAATACATGAGGATCTAGGTCACCAAGATTTGCACCTTTGTATTTTTCCATAGTACGGGCATCAACCAGATTAGGTAGCCTTTGGAATGGATTTATTGCAATCAGAATGTTACCAGTATAGGTATAAATGATATTTTTCGCATATCTGACAGC…
circ_000407	chr3	128799329	128800942	-	Zm00001eb136710	128799329-128799445,128799564-128799637,128800937-128800942,	3	exon	197	GT-AG	CTAGTGAACAACAGATCCATAAAAGACGACCTCTGCAGGACCAGTCATGTAAACATGATTGTCATCCTCCCTCCACTCAATTTCCAATGGCCCGCCAGGCAAATCAACTACACATTTCCGCTCAGCTCGACCCTCAAGAACAGCTGCAACAACCACTGCACAAGCACCAGTACCACAGGCAAGAGTTGCTCCTTTAC
circ_000408	chr3	177522489	177522842	-	Zm00001eb146000	177522489-177522842,	1	exon	354	TA-CG	CGCCACGGCGGAGGCCCCCGACATGGGCTTCTTCCCGCGCCACGACACGTCCACCATCATCGACGGCTGCAACGGGCTGCTGCTCTACTACGCGTCCCGCCCGACGGCGGCGTTCCACGTCGTGAACCCGACCACGCGGCGGTGGGCGGAGCTGCCGGCGCCGCGCGCGAGGACGCTGCTCTCCGTGCTGGCGTTCGACCCCTGCGCGTCCCCGCGCTACCGGGTGGTGTGCTTCACCGGGTGGCTCCCCCGGGGCGCGACCCTCGAGGTGTTCGACTCGGAGCGCGGCGCGTGGACCGACCACGAGGTCGACTTCGGCCTCGACACCGACGCCATGTCCGCCACCATGCACTA
circ_000409	chr3	150659648	150659731	+	Zm00001eb140820	150659648-150659731,	1	intron	84	GT-AG	CTGAGCAGCGGACCTGCGCCGCTGCCACCGGCCACCCCACAGGAGAACTGCGCTGCCGCCCTCCTTTGACCAGCCATCCTCCAC
circ_000410	chr3	227697658	227699109	-	Zm00001eb161030	227697658-227697745,227698413-227698528,227698609-227698668,227699023-227699109,	4	exon	351	GT-TA	TATTACAATCTGTTGGCTCTAGTGTCAAAGGATCTGAAGAAGCTTTATCTCGAAAAAATCGGGTCAATCCTTGGACTACTTCCCCATACTTTCATCACAATAAATAATAGCTCCATAGTCATGGCGATGTCTGATAACACGTCCAACAGCCTGATTGACAGCCCGTGCTGCTTGTTGCACATACCATTCTTCTCCTGTCAACATCTTTGTGTTTTTATTAGATGGTGTCCCCTGCTTATCCAAATACTCGCGCTTGAGCCGAACCTTGGCATCAGTTGGAGTAGCAAAGGGCATTCCAGTAACTATTACTGCCCTCCCAGCACGATCAGCAAAATCAAGACCCTCACTAAC
circ_000411	chr3	196195164	196195668	-	Zm00001eb151510	196195164-196195372,196195467-196195668,	2	exon	411	GA-AG	CTGAATATATTGGATAACTGATGAATTCTCATTCTTCTGGTTTAATCCCTCAGTTTGGTAGTAGCATTTCAAGTCATTTTCAAGCATGATGACCCTTTTAATCAGATATTCTGATGGAGACATGGATTTGAACAAAGAATTGGGCGTAGTAAATATAGTGTTTTCGATTTCTTCTACGATAGATTTTGCTTCACTTGGTTCAATGTTCCCTTGAACATAACATTCCAAAAATGTTTTTGACAGTAGGTGTGGTACGAACTTTGCAAAATAATCTGATTCAAGCTTAGAAAGAGCTTCAAGTTTCTCAGCTACAGGCCATTTTTTATCTCCCAATATCAAAGAGACATAGTATGACGCTTGAGAATAAGGTTGTCGGAAATTGAAATTCTGGTAGTCCTT…
circ_000412	chr3	7051338	7051597	+	Zm00001eb121410	7051338-7051597,	1	exon	260	TC-AG	CTGGAGCGCACGAGAGAGAGATAGAAGAGAGACGGACCGACGACCGACGGCGATCTCGATCGGTAGGCAGCCGTTGCTTCTTCTTGCTTGGCGGGCGGGGCGGCCACCATAGCCCTCTGTAGCTCTTGCCGGCTTTCCTTGTGCTCCTTGGAATCTCGCCCTGCATATCTTGTACTACAGTAGCTAGCTCCTCTGCTACTGTAGAGCTACAGGCAAGAGGGAAGCAGGCAGCGACCGAGCTCTAGCTGCCGGCTGTGCGA
circ_000413	chr3	218795434	218795592	-	Zm00001eb158050	218795434-218795592,	1	exon	159	CA-TA	TAGGCAAAGAAACTGCTCCTGTTGCTAGCCCTCCTGACAGTCAAGAGAAGCCATCCATCATGCATGATTCTGAGACAGGTATGGAGGTTGATAAAGTTATCGATGATATTCATGGGGATGGTAGGGTGAGCTCTATTCTTGGCACCAAACTTGATGTTG
circ_000414	chr3	186758990	186759165	+	Zm00001eb148610	186758990-186759165,	1	exon	176	GT-TG	CAAACCAAAAGTGCCATGGCAAAAAATATCATTGCCAACTTGCACGAGAAATACTCAAATTCTAAATGCATGCAAAATGATTACCTGTTGACCCGAGATCACTGTATGCCACCATTAAATAGTGTTCCAATCTTCCATGAAACCACTTAATCCCATTTATCCTCAATTGACACCAC
circ_000415	chr3	209811953	209814720	-	Zm00001eb155310	209811953-209812117,209814550-209814720,	2	exon	336	GT-AG	CTGCAGGCAGGCTTAATTAGCGAGCTTGAAGTAGAGTATGAGAAGGATGGCCAGAACGAGAGCCGTGATAATTCCCCCAATGATCCACTTGTTCCTATCCATCCTCTTTGACATTGCAGCCAGGATCTTCTTGCTCTTGCCAATGTTGTCATCAACTCCGTGCAAAGTAGTATGAGCATGTAGTAGTGACTGTCGCTGTTGGTGAAGATCCTGAAGAATTGACACACCAAGCTCTTCTGTCTCCAACATAGTTCTTCGGCTCTCTTTAATTCTGTCAGTTGACTGATTCAGTCTTTCAGTTGTCATCATCAATCTCCCCCTCTGATCAGTAGACAC
circ_000416	chr3	192538074	192544843	+	Zm00001eb150440	192538074-192538211,192538331-192538399,192538546-192538629,192538733-192538910,192539108-192539224,192544785-192544843,	6	exon	645	GC-AC	GTTGAACTCAATATCCGTCCGTTTCATGAGTGAGTCCACATAATGTTCAAGTCCTGCAGCATTATCTATAGGGCCATCCGTCTGAACTATGATTTTATCTGCATTCAAAATAATCTCTGCTTGTAATAATCGACCAACATCAAACGGTTCTGGGGCATACGTAAATTTTGTTGCTCCCGATATGAGTCCTCTACTGCCACCAGAAATTACACGATACCACTGAATTGGACAGTTCGCAATGTTTGGAGCACCATCAACTCGAGGAATAATACAAAACTGCGATCCAAGGGTATTAGAACCTTCAAGCTCAAAGAGGTCAGAACTATCTACTTCTAACCTCTTGATCGTGGCAAGCTCTTTATTTAGCTGATTGCATAGCTGAGTCTTCTGTGAGATGAG…
circ_000417	chr3	192538074	192544843	+	Zm00001eb150440	192538074-192538211,192538331-192538399,192538546-192538629,192538733-192538910,192539089-192539224,192544785-192544843,	6	exon	664	GC-AC	GTTGAACTCAATATCCGTCCGTTTCATGAGTGAGTCCACATAATGTTCAAGTCCTGCAGCATTATCTATAGGGCCATCCGTCTGAACTATGATTTTATCTGCATTCAAAATAATCTCTGCTTGTAATAATCGACCAACATCAAACGGTTCTGGGGCATACGTAAATTTTGTTGCTCCTGCAGGAAGAGTTCACATCCGATATGAGTCCTCTACTGCCACCAGAAATTACACGATACCACTGAATTGGACAGTTCGCAATGTTTGGAGCACCATCAACTCGAGGAATAATACAAAACTGCGATCCAAGGGTATTAGAACCTTCAAGCTCAAAGAGGTCAGAACTATCTACTTCTAACCTCTTGATCGTGGCAAGCTCTTTATTTAGCTGATTGCATAGCT…
circ_000418	chr3	21436588	21437001	-	Zm00001eb125120	21436588-21436699,21436807-21437001,	2	exon	307	AT-GA	TCTGCAGCAGTGGGACGTCGCTGGCGGCGTGGCCATGGACCATGAAGGGTTCGGCCTCCTGGAGGCTGTGGCGGTGCTCGTACGCGTCCTGCAGCATCTGCTGCACCACCATCGTCTGGCCTCTGTTCAGCTGGTGCAGCGGCCACTCCGCGCCGCCGATGTCGACCCTCACGACGTTGAAGACGGAGTCCACGTAGATGGTGCCGTGGGGCGTGCTGTGCGCGTACACCTTGTCGTCGGTGGCGCAGGTCCTGGCGTGGTTCGTCGTCGCCTCCCACATGCGGTCGGTCATGCCGTCGCCCAGAAT
circ_000419	chr3	135642519	135642893	+	n/a	135642519-135642893,	1	intergenic	375	GT-GG	CCTTGCTTTCACAAAACACCATGTTGCCTGTCACACCCGGTTTTGGAAGGCAAACCGAATGCGAACTATGTACGTGCCAGGATCAGAACTCACGTACACAGCGGTTACATAAATGAACATCAACGCACATTGCTTGAATGATAACATAAAAGAGTATTAACTTATTACATCACAGAGTCGTAGACATCCACATAGTCATCAACTTAACAGATAAATCAAAGTGCTAGCGAAACGCAGTAAAGATGAGGCCTTCACAGGCAGCTGACTGGGGGTTGCCGCCAACCCACACCTAGAATTCACCGTAGTCTTGGAACTCCTGGAAGTCTCCTTCCACGGCTTCACCTTCTCCTGAGCAGTGGTTACAACGTGGACAAC
circ_000420	chr3	216341661	216341921	-	Zm00001eb157410	216341661-216341921,	1	exon	261	AC-AG	CTCATGGTAGACAGATGGAGCTACATGCTGAAGCAAGGCCGCGCCACCGTCGAGCAGCTAATAAGGCCGACCGATAGCCGCAGAACCTACCCGACCACCCTTCGGAAGGAGCTGACCGTGGTGCAGGAGTGAGTGAATCTCCGAACAGAAAGGCGAGAGGTGCTTTCAGACTTGCTGAAGAAGACGGTAGAGTGCTGCTGATGGTCTTTTGTGGCTTGTTTGCTTTGAGAGAGGTGTGGAGTTCTTTAATTTAGAACATGT
circ_000421	chr3	226900838	226900978	+	Zm00001eb160620	226900838-226900978,	1	exon	141	GT-AT	ATACACGATGGGTTCCTGGAGGCCATCGTGCGGGGCAACCGCTCGGGCCTCCTCACCGCCGCCGACTACAACAACCTCTGCCAGTGCGAGACCCTCGACGACATCAAGATGCACCTCACCGCCACCGAGTACGGGCCCTAC
circ_000422	chr3	126358751	126360730	-	Zm00001eb136230	126358751-126358845,126358992-126359073,126359158-126359208,126359666-126359764,126360659-126360730,	5	exon	399	AT-AG	CTTACATAGAAAATGCATTAATGTCATTCTACCACTAGTGGCACGGGTCTCTATAAGTTTTAGGAGGCTGTCCAAGCGAAAACCAACAGCCTGGCCTCTTGGTGTGCCTTGATTCAATGTATTCCCAATTAACAGAATGTTCTTCATGATAACCTTCAACTTCTCAGAGCTTCTGAGCTCCTCACAAGCAGATGATACAGTCTGCAAATTCTTTCTGACATCCCTAATCTTTAGAAGTTCCATCTCCTCTTTTGTTGGGCAAAATTTTATTAGATTTTCAATCTGGTCAGCATCCAAAACTGAATCGTCCAAAGCTAGAGCAGCACTCATCATATCAGGGAGCGGCATTTTGATTTTTGTCAACATGATCTCTGTGTTATTGGCCCGTCTTAGATCGAT
circ_000423	chr3	169661072	169661384	-	Zm00001eb144120	169661072-169661384,	1	exon	313	GT-TG	CATGTCGGCCTCGTGCAGGCGCTGCAGGACGTGGAGCTCCTGCCAGGGGTCGTTCTCCTGCAGGAAGCGCCAGGCCTCGGTGCGCTCCACGGCCGCGAACTCCTTGGCCAGCAGCCTGGCGCAGCGCAGGTGCAGGCGCGGCGCGTCGCAGAGGCCGGCCAGCTGCAGCACGTCCACCACCGAGTCCGCGGTGAGGCGCGCGCCGATGGCGCCCTCGCACGCCCGCTTCAGCCACGGCACCTGGTACGCGTGCGCCAGCACCAGCACCTGCACCGCGTGCTCCTCCATGTCGTCATCCTCATCCTCGCCGCAC
circ_000424	chr3	186807148	186807687	-	Zm00001eb148640	186807148-186807184,186807615-186807687,	2	exon	110	GA-TC	GAGGACCATATGTATTGAAAATACGGGCAATACGCACCTCAACACCACCACCACGATGATAGTCCATAGTTAAAGTCTCTGCTGTTCTCTTCCCCTCATCGTAACAGCTC
circ_000425	chr3	177129674	177134418	-	Zm00001eb145920	177129674-177129712,177129787-177129915,177130375-177130444,177130522-177130609,177134256-177134418,	5	exon	489	TT-AG	CTGCCGAGCAATTTCTTGTTGGGATGTGTAATCGTTGACCACGATATTAGTGCTTCCTGATTCATAGTCAAACTCAAGCTTTTCATCATCGCTTTGGGCATACACTGACTGCAGAATAAAGCGTGTTACGGGAATCCCATTTGACTGCTGCTGATCATTCATCACTATCTTGTAACCGAAAAGGGAGCAGCAGGCTTTCCGGAAGACCGAGATCCTCTCTGCAAACACCGCCTTGTATCTTTCTTCACGTTTTTCAAGTGTCGCAATTTGATTCTTAAGTTGTGCTAACTTTTCAGCAATATTAGCGTCTACCACGGTTCCAGGATCAGTTTGTCCTTTCAGTTCTTCAACTGCTTGCAGCCTCTCTTTTGTTTTCTTTAGCTCAGCTTGCAGTACTTC…
circ_000426	chr3	42479660	42480136	-	Zm00001eb128690	42479660-42479760,42479871-42480136,	2	exon	367	GC-AG	CTGGTATGAGATGCCGAGGGCGCGGGCGCGCCGCTGCGCGCTGAAGACGACGGACAGGAGGCCGCTCGCGACGACGACCGCCCGCGTCACCGGCGCGTTCTGGAATCCGGAGACGCCGCCCTGCATCTTCAGACGGAGGCCGCTGGTCCGGTCGGGGAGGCGAGGCGGAAGCGAGGTCAGGAGGCGCGGCAGCCTCCCCGGCCGTACGATCAGGTCGCGCGGCAGGGAACGCGAGTGGGGGCTCGGCTGTACTTCCCTTGGGTGATGCAGGCGGCGGGACGGGACGGAGCCCGGTAGGAGACTGCCGGACGAGCGTGGCGAGACGGCCAGACGGGTGTTGTCGTGTTGAGACGGTGGTGGTAGTTGC
circ_000427	chr3	190587207	190588255	+	Zm00001eb149670	190587207-190587212,190587748-190588034,190588204-190588255,	3	exon	345	AA-TG	CAGAAAGATGATCACGTAGGGTACCATTGGGCATGAACTCATAAACCAGCATCTGCTCGTCTTCTTCATCACAATAGCCAACAAGAGAAACCAAATTGCGATGATGTAATCTTGACAGCAATTCTATTTCTGTGCAGAACTCCTTTGAACCTTGCAGAGAATCTTCATGTGCACGTTTGATTGCCACTGTTGTTCCATCAGCTAAATTTCCTCTGTAAACTTTTCCATAACCCCCTTGACCAACTTGAGCTGAAATATCAAAATCCCTTGTTGCCACAGCCATTTCGTCAAATGTGAAGCATTTCACACCATCAACCTTGACAGAAAACCTTGAAAGTAGAAATT
circ_000428	chr3	235329859	235330444	-	Zm00001eb163260	235329859-235329880,235330006-235330174,235330403-235330444,	3	exon	233	GA-AG	CTTCTTTCCAGCGAGAAAAATCCTGCTCGAAGACTTGAGCTGCTCCCTGAGGTCCTTGAGCTTCTGATTCCTCATGTTATCGTAGGTAAAAACATAGGCGCTGCTGTATTTGTCGACAGCATCTTTTATCTCGGCGACTACTTTGCCCTTGCGCTCTAAACCTGGCTTCTTCTTGGTCTTCGATAAGGTCACTGGGCGGTTGCGCTTCGACTTCGGCATCGCGTTCCTGCTTC
circ_000429	chr3	145836527	145836670	-	Zm00001eb139740	145836527-145836670,	1	exon	144	GT-AT	ATTTGCTCCGGCGTCTAGCAGGCTGAGCACGCAGTCCGTCCTGCCGTGCATGGCCGCCAGCATCAACGGGGTCTGCTTCTTCCGGTTCAGCACGTCCACGTTCCCGCCGGCGCCACCGTCATCGAACAACAACATGGAGAGCAC
circ_000430	chr4	225854226	225856242	+	n/a	225854226-225854367,225854470-225854562,225855891-225856242,	3	intergenic	587	CT-AG	CTGAGCAAGAGAACCTTCTGGAGATGATAGACCACAATATTTCAATGTCACATCACAACATGTGCTCTTCGGATACAACTTAGTGACAACCTGAAGCTGATGAAATCTACCACATAAAACCTCAGTTCCATCAATATTGATGATCCTTGCACCAGCCTGGCCAATGGATACATCCATCATAAATTGAATCACATTTGGGGAAACCTTCTCAAGGGGAAAAGACATATCTTCATCTGGTTGGTAACTCAACAGCTTATTAATAGCCTGCCACTCTTCTTTAGTCAGTTGTTCCTCTTCATCTAACTGTGATTCTGGGTGTGTAGCTTCCTCAGAAGGTAAACCAGTCGTGTTCCATGCAAAAGGCCACCATCTTTTCTTTGAGGCCCCTTTTCTATATAG…
circ_000431	chr4	152152609	152152793	+	Zm00001eb185730	152152609-152152793,	1	exon	185	GT-AG	CTTGATTCAAAACGGCACTTATTAAGATCTACGATCCATCTTCTGTCACCTTGTGTCACGCCACCTTTGTATACATGAACCTATCCCTGCCGATTTTCCACCTGATTAATCCGGATGAGGATGTTCCCAGAGCGAGGTTCTTCTTCAGTCCACTGGAGTGAATTCTTTTCCACATACTTCATCAC
circ_000432	chr4	75873779	75874140	+	Zm00001eb178520	75873779-75874140,	1	exon	362	GT-AG	CTTTACATCACTCTCAATTTTATTAGCCTGAAATTCAATCCTTGAATCACTATGAACGTCCCTGGCATCGACTTTTGTTTCGCGGTCATCTGCCTTACTGTCCCGTGCATCTTTATTTTGCTTTGACTCTAATCTGCTGTCAGACGAGATGGGGTGAACAGCAAAGTTAGTGGAGCCAACAGGCATCCGATGTACAGATGGCCTCTTATCATCACGAGACTCCACACGTTGAAATTTCGCAAATCTACCATCATGTTCAGAAGAACCATGGAAATCACTGCCACCGGACTGAATAAATTTCCCAGGACTCGAATACAAGCTGCTGTCATCCAAAGGGCGTTTTGTTGGTGTGGAGTGACTAC
circ_000433	chr4	124465128	124465482	+	Zm00001eb182330	124465128-124465188,124465407-124465482,	2	exon	137	GG-AG	CTTGTCAAGTCACTGTAGATGACACGAACAGAAGGTTCCTTTGATTCCACACGGGCTCTTTTAACTCCTCTTGAGGGACTTTCTTCAATAGAGATGCTGTTTGACTCATAAATTATTTCATTTTCAGTCCCGTCCCC
circ_000434	chr4	47119590	47119923	+	Zm00001eb175230	47119590-47119923,	1	exon	334	GT-TG	CAATACGTCCAAGAAAGTTCCAGATGCTAATCATTGACACAAATATGTGGGTTTCCTCGTAACCCAATGACTGGCTCATTTGCCCAAGATTATCAATCACAGTGAGACCAGATCCAGAGCCCAGCAGAAGGGAGAAAAATAGAAGCCAGAAATCAGCCTTGATGAGCGCTTGCATCAGTGTGAAATCCTCTCCTCTCCGTGGACCTTTCCTCCTCTTAACCCTGACAGCACCAACAGCAGCTGCCTGAAATAACCTTGTCTGCAATTCTGCTATCCTTCTTTGCCTCTCTGAGGCTGGAAGTAAATCAACATCCTTTGGCTTTTCATCCTCCAC
circ_000435	chr4	246521450	246522129	+	Zm00001eb208170	246521450-246521572,246521779-246521872,246521951-246522129,	3	intergenic-genetic	396	AT-TG	CAGTGACGGCAGTTGACCATGAGTAAATATAGGATTAGCAATAGCCAACTTGCCAAGAGCATCCAACATTAAGGAGAGATCCTTCTGCACTTGCCCAACCTTCATACGCACAGATGCTTCCTCCTTCAAGAGCAACTCTCTGGCCTCCTCTTTAGCAGTCTTAGCCTTGTCTATAGGAGCAGTCCTTTTTGTAGATTTCCCAGTTTCTCGCTTGCCAATGCCTGAGGATTCTTTCTTCTCATTCTTTGCAGGGACAATAGACCGAGCTGTCTCTGCATCTTGATCATCATATGCACGGAAACGCCCCTTTGCAAGTTTTGTATTTTTGTTAGCAACAGCCTCAGCAATGTAAACTCCTTGCTCGGTTGACAACTGCCCCTCTGGAGTATAGAATAT
circ_000436	chr4	212971370	212971679	+	Zm00001eb201140	212971370-212971679,	1	exon-intron	310	CC-TA	TAAAGTGCTCAACCATCAGCCTTTTCAATTCCTGTACTTTTGGAGTAATACTGTGAGATGAGGAAAGCTTCATCTTTTCTTTTAATCGCCAAAAGAATTCGTTCTTGTGCATCAAATTCAATGACCTTCAATAAACGAGAATAGAGTTAAAGATGAACATAGATAAAAGCTTGCTTGCAAACCAACGCGCAAAACCAAAATATAAGTATTGTCAAGGGCCTTAGTGTCTAGGGTAGGTGGCCCTATGCTACGAAGATCGTAGCCGCGGTCCGTCGTCTTCTCCGGCGAGGTTATGCCCCTCTGTCGTCGG
circ_000437	chr4	65866719	65867138	-	n/a	65866719-65866909,65867050-65867138,	2	intergenic	280	TA-AG	CTGGGGTACCGAACATTGCGCCCTTGCGGAGGCAGACAATGGTGCGCCCTTGCGGAGGTGGGGGTTTCCTTGACCAGATGGTTGAGGCATGCAGCATAGCGTTCTGTGTAATAACGCCATCGGAGAGGATCAAAATCAAATGGTGCTCCAGAAGAGTATGCAGCACATCAATATGTTCAGATTCGAACGACCAACGGGTACAGAAGGAATTGGCCACAGAAATCATTCGCTCTTCACCACATGAGCATCACATCTCCGAAATCACCAACCACCATGCCTA
circ_000438	chr4	223807444	223807539	+	Zm00001eb202830	223807444-223807539,	1	exon	96	GC-CT	AGCGCAGGAAACAGATCTCATAGGCACTGGTTGCAGGCGGAGGAATGTGTTACCCTTCCTCACCGGGGAGAAGGCTAGAGAATTTGAGTTGATTGC
circ_000439	chr4	28345673	28345903	-	Zm00001eb171040	28345673-28345751,28345827-28345903,	2	exon	156	GG-AG	CTTAAAAATGAAATATGAAGTAGGGACAGTGACAGGTCTCTTGGACATTCCACCATATGTCACCATGGTGCCTCCTTGCTTCAAAAGCTTGAGTATTAGAGAAGCAGCATTTCCTCCAACACAGTTAAATCCTAATGCAGGCTCTGGCAAAGCACC
circ_000440	chr4	169076702	169076986	+	Zm00001eb189450	169076702-169076986,	1	exon	285	GT-CG	CGGGACCTACAGCTCCGACACGCTCACGCTTGGCTCCAGCGCCATGACGGACTTCCAGTTCGGGTGCAGCCAGTCGGAGTCCGGCGGCTTCAACGACCAAACCGACGGGCTCATGGGGCTCGGCGGCGGCGCGCAGTCTCTCGCGTCCCAGACGGCGGGGACCTTTGGCACGGCCTTCTCTTACTGCCTCCCGCCAACTTCGGGTTCGTCCGGATTCCTCACTCTTGGAACGGGAAGTTCGGGTTTCGTGAAGACGCCGATGCTCAGGAGCACCCAGATCCCGAC
circ_000441	chr4	184593591	184593908	-	Zm00001eb193840	184593591-184593908,	1	exon	318	GT-GG	CCCTGGTTCAAGGAGCGGTACGGTGGGGAGTCGGCGCAGGCGGCCGCGGCGACGAGGCCCGCGGCCGCCGCCCGGCCCGTGCCACCTTACGGAAAGCGGACGGGGTTCGTGCCGCGACGGCCGGAGGACTTCGGGGATGGCGGCGCCTTTCCGGAGATCCACGTCGCGCAGTATCCGCTCGGCATGGGACGCCGTGATGATAAGGGCGGATCCAAGATCCTTGCGCTCACCGTCGACGCACACGGCAGCGTCGCCTTCGACGCCGTCGTCAAGCAGGGGGAGAACGCAGGCAAGATCGTCTACTCTAAGCATAGCGAC
circ_000442	chr4	239155982	239162762	-	Zm00001eb205270	239155982-239156011,239162474-239162762,	2	exon	319	GC-CG	CGCCGGCCGCATCATCGTTCCGCCCCCCTGAGTGTTCAGTAACTTCTTCCGATCCATATTATGGCTTCAAAGCAGCAGCAGAAACAGTTCCTGGATGAAGCCATGATCAAGCAGCCGACACCGGAGGAGGACCGTGAGGGCGCATGGCCCTCAGTGCTGACGATCATCGGCTTTGGATTCCTAACCTTCAACTCATTCATGGCTGTGTACAGGTCAAATGGAGATGTTGGATCTATCTCCTTTGTGGTCTTCTCTTACCTGGTCCTCGTTCTGCTGTTCTACTGCCTGCGCCGATTCGAGACAACTCCACCAGAGTCGC
circ_000443	chr4	228313856	228314599	-	Zm00001eb203470	228313856-228314004,228314174-228314295,228314425-228314599,	3	exon	446	GT-AG	CTGAAAAAGTGAGCCCCTATAATTCTATCTTGAGAATTTGTCTTCTTGCCAACAACATTCAAATCAATGGTGGATGTGTTTGTTGCAAGTATGCAATGTTTTGGACAGATTTTCTCAATGTCAGCAAATATTGATTGCTTCAAAGGAATCTCAATAACCATATCAACATCCTTGAAATCTGAATAATCCAAAGCACCCTTGAGAAGGGCCATGGCCTTGTGCATCCTATCCTTTGTTAGTGAACCTCTTTTGACCAGGCCCTCAAGATTACCTGCTATTGTTTTCTCTCCCCTTTGCAGAAACTGAGGGTTTACTTCCTTGAGCACAACAGAAATGTTGCTAACAAGAAGTGATGTGGCAATTCCAGATCCCATCAGACCACCACCAATAACAGCAACT…
circ_000444	chr4	102019944	102020701	-	Zm00001eb181030	102019944-102020336,102020448-102020521,102020634-102020701,	3	exon	535	GA-AG	CTTGTTCTGTTGCTTAAGATTTCTTAGGCAATCCCTCATCCTCTCAGCCTTTGTAGCTGGCCGGACAGGCAATGCACTCTGCAGATTCATATACCACAGTGAGTAAAATAAAAAAACAAGAAGTGAATAAAGATTAACCTATACTAAGACTAATAGATGAAATATGTTCTCCTAGGAAGTATAGCACTCAACAATTTTCATCTCAGCGGTCCAATAGGTCAAGATCTTAAAAATAGAACAAAGTGACGTTTAAAGTATAGCTATAGCCATCATAGTAAAGGAGAATCCAGATTCAAAAGAAAATGCCTTCTTCTCTTCAACAGGAAGCGGTGCACTTGGTTTGGCAGCTGCTGGGTCTTCTGGTGGCAGTCCTAGTTTCCTTCTCCTTTCAGCCTTATC…
circ_000445	chr4	191165088	191165404	+	Zm00001eb195940	191165088-191165404,	1	exon	317	CA-CT	AGAGGCTCAACGTGTCATCCAACTTAGGAAACAACTGGGGGGTGCCCTTGTCACGAGCGTCACACATTCTACTTCTAGTCCGCTCATGATTACTCCACCAGAACAAACTTCGGCTATAATGCAGGGTTCAGAAGTAAGATCGACACATCCCCAGTCACAACCACTGAATCCTGCAGCTTCGCTTCCCCCTACAGTCAGTGCAGTGGGTGATGAGTCCAAGAGAACGGCGGCAGCTATGGCGGATAAGCTTGCATCTTTGTCAGCACCTGTGCAGGTGCTGACCTCCATTCTCTCATCTTTTGCTGCTGAGCAAGCTG
circ_000446	chr4	166236660	166236766	-	Zm00001eb188670	166236660-166236766,	1	exon	107	GT-AG	CTTGACTGTATCTCCCTGATCATCAGTCTTCTCCTCAAAAACCTCGCCAAGTATCATCTTAGCATCTTCAACTACAGCATTAACAGACCGTGTTCTTTTCATACCAC
circ_000447	chr4	148640345	148640728	-	Zm00001eb185250	148640345-148640728,	1	exon	384	GA-CA	TGCGGGGAGGTGCGGAGCGCGTACCTGTCCTGCTTCGGCTTCATCAGCGGGTCGAGCTCGCCGAGCCTCTTCGCCAGCTTCATGTAGGAGCTGCCTTCCAAGATGTGCTCCATGACCGCGGCGGCCTCGATCTGTCCGGGGTGGTGCTTCAGCTTGTGCGTGAGGTGGTCGGTGAACTCCGGCTTGCCCGTCATGACCTCGCAGAACACTGCGGAGATGACCTCGGCCAGGACGGCGAGCACGTTGGCCTCGAAGAGCACGGTGGACGCAAGGCCAGAGCCCACGGCCGTGCCGTTGACCATGGCGAGACCTTCCTTGGGCTGCAGCTCGAAGAAGCCATGCTCGATGCCCGCGATCTTGAACGCCTCCGCGGCGCCCACCTTC
circ_000448	chr4	184757790	184758015	-	Zm00001eb193930	184757790-184758015,	1	exon	226	TC-TG	CAATGGCACATTTTGTGATTCAATATCTGTGTTCACGCCATTGAAATTCCTTGCCAATGGGATAACATGCTCGCCCACATTGCACCCTTGTTCCATCCAAGATCTCTCTTGGACAAAAAGACCAAATAAACCTCTTCTCAAAGGCCCCCTTAGTTTAACTGATGTGCTGATCCAATTCAGTTTTCAGAGTATGTTGACATGGTTCGCGCACCTAGTCGACACAGGA
circ_000449	chr4	189765999	189767073	+	n/a	189765999-189766004,189766919-189767073,	2	intergenic	161	TT-AG	CTGAAATCTTTGGGACTCCAGAAATGAGAAGTGCCATCAATTGAACGTGTAAGTAGTATCGGCAGATTGGGATGTGAGAAGACAGAAGACACGGGAGACATCAAATTTTGTTCCATACTATCATAAACATATTTCTTGTTCCGCATGTCCCATATAATAAA
circ_000450	chr4	166237405	166237580	-	Zm00001eb188670	166237405-166237580,	1	exon	176	GT-GC	GCCTTGTACTTTTCAAATAGTTCGATGAGTCTGCTCCTGTCCCTGTTATATGCCTCTCGACGTTCCTTCAAACTCTTGCTCAATGAGTGCAGACTCTCAATATCCCTTCTAATATCTGCCTTGTCAGTCTCCGTTTTCTTTCTTTCCTCCAGCAGTAATTCTCTTTCCATCTGCAC
circ_000451	chr4	165040200	165040594	-	Zm00001eb188350	165040200-165040403,165040486-165040594,	2	exon	313	AG-TG	CATGGATTTCTTTAAGAAGTTGATCTTCTGTTACATATAACTTTTTCAGGGATTTCTTGATTTTTGTCTCCTAGAGGTCAGCCAATTCAGTCATTGAGCAGACATTTCCTAGAGGCCTCAGATACAACATCTTGTTCAATGTCCTGGAATCTTCTATGGTGCATATTGTCAATTTAGCAACATCATTCTCTTTTAAAAAAATACTAATTGTCCATCTTCAGCAGCGATGGCTAGACTTTGACGCCGGTGATGTCCCCCAGCAGCTGCACGAGCCATATAGCCTGGCATGCTCCAGCTGCATCCACCATATACT
circ_000452	chr4	35079525	35079651	-	Zm00001eb172580	35079525-35079651,	1	intron	127	GT-TG	CAAACACACCATACACCTACCTAATTGGGCTCACTGCACCAAACTTGAGCTCTCAGCTGCCCAAATCAATTTTCTCCTTGTCGTGCTTGAACTCCCCCCTGACTGAAGTCCCTGCCATTGTAGCAAC
circ_000453	chr4	8334698	8334872	+	Zm00001eb167530,Zm00001eb167540	8334698-8334872,	1	exon	175	GT-TG	CAGTCACCACCACCTAGTCCTTCTCTCCTCCACCTGTCGTCGTCGTCCACCCCTGTACCACCTCGGCCAGCGCGGCGGCGGCGGCTCCCCCGTCGCGGAGCCCCTCGGCGGCGGCCTTCTGCAGCTCGGCCACCTTGGCCCTGACCGCGGCGCCCTTCCCTTCCCCGCGCATCAC
circ_000454	chr4	199675909	199676375	+	Zm00001eb198260	199675909-199675931,199676009-199676375,	2	exon	390	GG-AG	CTATGGATTAGGGGATGATGATGTGCATATGATCTGAATCTCTGTTGGCTGCCACTGTCATATCTTGGTAGTCCTATACCAAATGGAGTCATAGAATACTCAGGAATTCCTGATACAGGAAGATTACTCAAATGTCTGTGCTCACTGTCATGATTTATTGACTCAATCGCATGGAAAAGTTGAGCATTATTCAAATCAAGAGTGGCATGGCCTTCCAAGCCAGTTGCATGCCGACGAAATGAAGTGCTTTCAGCACCAGGATTAGATGTAGAAGGCACATGAACAGGATGCAGAAAACCACGCAGGGCAAGATATGGGCAAACAAGTGAACTGCTTGCAGCACTTGAGCGATCTCCAGTTGTGTGATAAGTAAGCTCAGCTTCACGCTCC
circ_000455	chr4	39432374	39432443	+	Zm00001eb173660	39432374-39432443,	1	exon	70	AA-AG	CTTCTTCATCATCTGGGTCCTCCACATATGGCTCTTTGCTTTCCCTTTGATGCTTCCTAAAGTTACCATT
circ_000456	chr4	166191663	166192513	-	Zm00001eb188600	166191663-166191737,166192423-166192513,	2	exon	166	GC-TG	CAAAATAGTTTTGTTTTCCCCAAGGATATCCTGCAAGGTTTCCTTGAGTTCTTTCTCCTCCTCCTTGGTGAGTGAAATAACTGTCCTGACCACAACCTTCATCTCCCCCTTATGTTCCATAGTCAAATCAACAAATCTCTCCGCAATGCGTTCAATATATTTCAGC
circ_000457	chr4	232171373	232171700	-	Zm00001eb204190	232171373-232171700,	1	exon	328	CA-AG	CTTTGGAGCTTTGCCCATCGCCAGGAACCAACAGGCACCATGGCCTGTCTGGGGGTAGGGATCTAGTGACTGGATCTGAATGCATTCATTGTGATCGTTCAAAACTTGGTCTCTTTTATCTGATGGCGAAAAATACCGGACTCTAGTTATCGCACCAATCATCGTTGTACAACACAGCTAAATTAGCAACGGTGTGTTTTGAGCTCTCCTACTCCTGCTGCTGCTGCTTCTTGTCCTGTGCCATCTTCTTGCGGATCTCCTGTGCAGCGTTGAAGATGCCCAGCGTCGGTTTGTTGCAGACGTAGCACTTCTTGTTCTTCGAGTGGTG
circ_000458	chr4	189818103	189819295	+	n/a	189818103-189818332,189818711-189818842,189818930-189819078,189819227-189819295,	4	intergenic	580	CA-AG	CTCGTTGGCCCAATCAAACGTAGATCCCAAACAGGGCCACATAAACCAAGGCTAAGTATTCTCTCAAGCCTGAAATTAGCAGAACTCCACAAATGAATAGTGCCATCTGCTGAACCTGTAGTTATATATGGAGTGTCCGGAAGGGAAATGACAGAAACAACTGGCGACATGAAAACATCCATTGTCTGGACGCATTCCTTTTCCTTCAAGGCCCATGCCTTGGCAGTACAGTCTTGAGATCCACTAATCAAATATTGCTGACCATCATGTGTGACGAAATCCAAGCAATTCACTTTGTCCGAATGGCCGTGCAGAGTACACTCTGATGTGGGAGATTTCAGGCACCAAAGCTTTATTGTGTGATCACTTGAAACACTGGCAAAACTGTCATTTGGGCTA…
circ_000459	chr4	189818103	189819295	+	n/a	189818103-189818332,189818419-189818496,189818711-189818842,189818930-189819078,189819227-189819295,	5	intergenic	658	CA-AG	CTCGTTGGCCCAATCAAACGTAGATCCCAAACAGGGCCACATAAACCAAGGCTAAGTATTCTCTCAAGCCTGAAATTAGCAGAACTCCACAAATGAATAGTGCCATCTGCTGAACCTGTAGTTATATATGGAGTGTCCGGAAGGGAAATGACAGAAACAACTGGCGACATGAAAACATCCATTGTCTGGACGCATTCCTTTTCCTTCAAGGCCCATGCCTTGGCAGTACAGTCTTGAGATCCACTAATCAAATATTGCTGACCATCATGTGTGACGAAATCCAAGCAATTCACTTTGTCCGAATGGCCGTGCAGAGTACACTCTGATGTGGGAGATTTCAGGCACCAAAGCATAACCCAACACACTAATTCATCCAAGAAGCTTCTCTGCAGCCTTGCT…
circ_000460	chr4	191258574	191259494	-	Zm00001eb195950,Zm00001eb195960	191258574-191258742,191259489-191259494,	2	exon	175	TC-AT	ATGCGGCGAGCTCCTTCTGGGTGCGGTAGAGGAACTGCAGCACAGCGGCGATCTCGTCCCGGAACCGGGAGAAAGGGCCGCCCCCGTCGTTGTCGCCGTCGCCGTCTAGCTGCAGCTTACGGAGCTTGCAGAGGCCCTCGCCGAGCTCCATCATCGCGCCGCGGTGGTTTGTGGA
circ_000461	chr4	245860599	245861107	-	Zm00001eb207840	245860599-245860681,245861019-245861107,	2	exon	172	GA-AA	TTCATGGTGTAAGCACCACCAGCCTTCACCTTCCCACAGTCCTTGCACCCCCAAATTCCAACTGCTTTCCTCTTCACAGCAAACTTCCCACAGAACTCGCAAAAGTACTTGGAATGCTGAGATACCTCCATCTTCTTGATTTGCTTACGCAAGCTAGCACCATACCTGGTTC
circ_000462	chr4	61129858	61131183	-	Zm00001eb176750	61129858-61129939,61130018-61130068,61130166-61130246,61130409-61130450,61130541-61130639,61131112-61131183,	6	exon	427	AT-AG	CTCTAGCAGTGCCTTGGTTCAATGCATTTCCGAGAGAAAGAATTGTCTGCATAATCCTTTTCAACTTGACTGAACCTCGTATCTCTTCTGCTGAAGAATTAACAATGTTCAGGTTCCGCTTAAGGTCAGAAACCTGGGAACGGAATTGAATCTTAAATGAGAAAACTCTCAGCTTAGATTCTACACGTGGTAATTTCATAAGCTCCATAAAGAACTGCTCACATTCTCCAAGAACTTGCTTGTCTCCTTTGTAACCCTTTAGAAGTTCAATTTCATCTTTAGTTGGAGTGAACTTAATAAGGTTCTCCACCTGGTCAGCATCCAGAACAGTATCATCCAGAGCCAGAATTGCACTCATTAGGTCAGGCAGTGGCATTTTGACTTTGGTAAGCATGATTC…
circ_000463	chr4	246128794	246129062	-	Zm00001eb208030	246128794-246129062,	1	exon	269	GT-TG	CATTTCAGCAGTTGCTGCACTCAGCTGCTCTTGCATGCGCTGCTTCGCAGCCTCAATTGAAGTGTCAGTCTGCCACTGGACATCATCGTCATCATCATCTGCAGCTGCTTTGTCACCATCATGGCTGCGAGTTGGAGAGGATGAGTGATCCTCATCAGAGCCAGTAGCAGTAGTAGCCTTCTTCTTCAAACCCTTAGCAGTGGAATCCTTGGAACCCTTCTTCTTTGCATCCTTCTTCAGTTTCTTCTGCTCCTCATCAGCAGCCTCAC
circ_000464	chr4	166039841	166043626	+	Zm00001eb188560	166039841-166039846,166041909-166042019,166043516-166043626,	3	exon	228	AA-AG	CTCACAAAGCATTTCAATAGTCTCGGCATCATGTGCGTTCATACACTTTTGATTCCACGTCTCAATAGAATTTTGTACCCATTCACAGCTTATGCAGTCAGGAAGAATCATATTTTGAAATTTGAGGAGCATCTTCCCAAGATCAGTGTAATCTCTACAGCAAGATGCTTCCAGGGCAAATTCTTTCCATGTTGTAGCCTTCCGTGCATTATCAACTACAGCTTAGTT
circ_000465	chr4	187162039	187163228	-	Zm00001eb194530	187162039-187162044,187163034-187163228,	2	exon	201	GT-AC	GTGTGCCGCTCTCGTGTCCGTGGCGACGGCGAGGGTGACGAACATCATGTTGAAGGTGACGATGACCTCGATGATGAGCGAGTGCCAGTGCGGCCCCGCCGGCGTGGTGGTGCCCAGCACGGCGATGGGGTGCAGCACGGCCTTGAGCACGAACGACGCGCAGATGGCGCCGGTGAACTGCGCCGCCCAGTAGAACGGGAC
circ_000466	chr4	68472055	68473110	-	Zm00001eb177530	68472055-68472190,68472550-68472695,68472885-68473110,	3	exon	508	AG-AG	CTTCCTGGCAACATCAGTACCAGACAGATCATCTCTTGGATCTGGTTCTGTGTATCCTGCTTTTTTTGCTTCAGCAACAACATCACTAAAGGTTCTTGCTCCTTCGAAGTTGTTAAAAATATAACTTAACGTTCCACTGAAAATCCCTTCAATGCGCAATATCTTGTCACCTGTCTCTAGGAGACCACGCAGAGTGCTAATGATAGGGAGGCCAGCACCAACAGTTGCTTCATAGAAGTAATGAGTATATGATGCACGCTGAAGAGTTCTAAGTTTAAGATACCTGTCAAGTGGCCCTGAATTTGCTTTCTTGTTTGGAGTGATGACATGGATTCCTTTCTTTAGCCAATCATAATAGTGAGATGCAACACTTGTATCTGCTGTGCAATCTACCAAAAC…
circ_000467	chr4	179131971	179135074	-	Zm00001eb192500	179131971-179132062,179132998-179133105,179133499-179133588,179134955-179135074,	4	exon	410	AC-AG	CTCTAATCTTCCTAGTCAGAAATACATACAGGACCTTAACCTGCTCACTCTGTCTGTTGTATGAGCTGTGTCCTTAGGCTGGACTCCTGGACCTGTAGTGCTGCTGCTGTTGCCAAGAGTTCTCTGTACTCATTGAGTAAGATACTTTCCTTAGCAGCAACAGCTGAAAGTTCCGTAACCAGAGAGTGTGAAGCCTGTAACTTTGATAGCAAATGGCAAATGGATGACCCCATCGCTTGCATAATGTCAACTGCTGAACTGACAGCATTCTTAACAGTAAGTACATCAGCTTGCTCCTTCAACACTATTCCCAATTTGACCTCTTGCCTTAGTCTTTGTACATAGCTCCTCTTCATAACCATATTGTCGCACATCCTTGAGTTAGCATCCCATACACTG…
circ_000468	chr4	37200733	37201391	-	Zm00001eb172980	37200733-37200803,37201322-37201391,	2	exon	141	GT-AG	CTTGAAGGCCACATGGGACTTGCTGATGTTCTTGATCCTGACCGCGCTCCGGACTTGCTTGCCGGGCTCATATGGGAAGTAGAGCTTGGCGGGCGGATCTAGGCGGAGGCGGCGCCGGGTGGGGAGCAGCGACCGGATCAC
circ_000469	chr4	248821221	248821367	+	Zm00001eb209560,Zm00001eb209570	248821221-248821367,	1	exon	147	CC-AG	CTTGGCGAGGAGGTCTATCCAGATGGACCTGAGCTCCTGGCTGACCTTTGGGTGTCCGAGCGAGTCGGCGAATCGCCTCACGAATCGGTCCTGTCGGTCGGCGTCCCAGGAGCGGTACCTCTCCCCTGGCTGCTTGAAGTCGTTGGG
circ_000470	chr4	175099687	175099824	+	Zm00001eb190950	175099687-175099824,	1	exon-intron	138	CG-CT	AGGCGGGGGAATTAATAGATGGAGGGCAAGGAGGAGGACGTTCGCCTGGGCGCCAACCGCTACTCGGAGCGCCAGCCAATCGGCACGGCGGCGCAGGGCACGGAGGAGAAGGACTACAAGGAGCCTCCGCCGGCGCCG
circ_000471	chr4	31049792	31049959	+	Zm00001eb171750	31049792-31049959,	1	intron	168	GT-GA	TCAGTTTTCTAAAATAAATTCGTATTGGACAGAACATCGTTCATGTGTATATTGCTTGTCAGACATTTCGTCGATCAGGAATCAGGCGTCCACGATTTCCATGCCAAGCCATGGACGCGGTGCGCAGTATGCAGCAACACCATAAGCACGACGAGGTAGACGACCGAC
circ_000472	chr4	154513123	154513280	-	Zm00001eb186130	154513123-154513280,	1	exon	158	GA-AG	CTCCTTCTCGCTCAGTGGCCTCAGCCTGACCAGCACCTGTATCCTGTCCATCCTGCCCACACTTGTTCCGCCGCCATTAACAGCATCAGCTCCAGCCACTTTATCCCACTGCACCGACTCATTGCCTCCAATAGCCCCCATTGGCTTAACACTAACTC
circ_000473	chr4	26413971	26414635	-	Zm00001eb170650	26413971-26414202,26414630-26414635,	2	exon-intron	238	AA-TG	CAGAAAACACCACTGTTGTTGTTGAGCTGTCTTCGTCTACACTGGTAGATCTCCCACCTACTGTGGCATGGCAAGGGTCCTCTGTTGGTGTTTCAATTGCTTCACTGTGATTATCAGCCATGCCAAGGCTTCTTGCTTCATCAGTTTTCCGTACAGATTTGAGAGCATCAAGTTTATAAGCTTTAATACAACTCAAGTCCATCTCAGAAGCCAACTTCAGAATATCCATCACGAGATT
circ_000474	chr4	163538292	163538771	+	Zm00001eb187980	163538292-163538407,163538718-163538771,	2	exon	170	AA-AG	CTCCCACTGCTACCACTAGCTTATTTTGATCAGTTAGTATCGTTCGCAAACCACCTCCGATATGCTCAAAGGTTGTATTTATCACTTGGATCCACTTCTCCCTGTCAGCATTTATCTCCTCCAAAAGCAATCGCCTCTTCACATCTTCAGTTTGCTTTGTTACTAGTATT
circ_000475	chr4	211477727	211479622	-	Zm00001eb200990	211477727-211477793,211477911-211478032,211479617-211479622,	3	exon	195	GC-AG	CTTCTTGCTGCCTCTTTTCCAGCCTCTCCTTTTCCAATTGCAATTTCACAGGGTCTATATTCTTCCCATGATCCAGAAGTGCCTTCTGTTGAGCCTTCACTATAGTCCCAGCAAAACGACTCCTGAGCATTGCTGCACGAAGAGCCCTGCTTGGTGATAAAGGTTCATCACAAAGGTAACTTTCCTCACCCAAGC
circ_000476	chr4	67992742	67992946	+	Zm00001eb177450	67992742-67992946,	1	intron	205	GT-TG	CAAACAAACACAACACAGACACATACCAGCCACACGACACACTACCACCCCAGCCTACCAAGAGGCTACAAGACTTTCCTTTCTCTAACCAGGGTCAAAAAGGGAGCGCATGTTCTTGGCTCCTGCAGAAAACCACAGTCTCATCTCATCTTTGAATCCATCCTCTAAGGTAGAAAGGCAGGGTCGAGCTCCGTAAAAAACACAC
circ_000477	chr4	189818103	189842557	+	n/a	189818103-189818108,189818930-189819078,189819227-189819295,189842494-189842557,	4	intergenic	288	CA-AG	CTCAGAACCTGTGTCAATATCCATGATGACTGATATTTCATAGTTGTTCGGTTGAATCACGATCCTCGTTGGCCCAATCAAACGTAGATCCCAAACAGGGCCACATAAACCAAGGCTAAGTATTCTCTCAAGCCTGAAATTAGCAGAACTCCACAAATGAATAGTGCCATCTGCTGAACCTGTAGTTATATATGGAGTGTCCGGAAGGGAAATGACAGAAACAACTGGCGACATGAAAACATCCATTGTCTGGACGCATTCCTTTTCCTTCAAGGCCCATGCAGTATG
circ_000478	chr4	22831009	22831128	-	Zm00001eb170040	22831009-22831128,	1	exon	120	GT-GC	GCCGCCGCCGCCATCGCGCGCGACTCGGCCGCCGTGTTCGCCTGGAAGGGGGAGACCCTCGAGGAGTACTGGTGGTGCACCGAGCGCTGCCTCGACTGGGGCGAGGCGGGCGGCCCCGAC
circ_000479	chr4	245449134	245449317	-	n/a	245449134-245449180,245449181-245449317,	2	intergenic	184	GG-TG	CATTGACAATGTCAAGGCAAAGATCCAGGACAAGGAGGGCATCCCACCTGACCAGCAACGTCTCATCTTTGCCGGCAAGCAGTTGGAGGATGGGAGGACCCTTGCTGACTACAACATCCAGAAGGAGAGCACCCTCCACTTGGTGCTGCGTCTTAGGGGTGGTATGCAGATCTTTGTGAAAACC
circ_000480	chr4	226937853	226938159	-	Zm00001eb203260	226937853-226938159,	1	exon	307	AG-AG	CTTTCCTTCAACATGCATCCCAGTTATATGCATGTTTGTTGTAATGCCAAATCCTAATCTCTTCCTTAGTTGCACAGCCATTCTTGCATCCATATCGTCAGCTGAAAGAAAATTCATCCCTATCTCTAGAACCTGGCATGTAAATTTTAGCTGTTTCACGGTCTACAAAATGAGTATCTGAGAGAGAACATATGATATTCACATTACACACCAAGTGGTCATCATCGGTTGATTGGTTAACTACCCTAATATCTGTAAACATCGGTGGGTTCCTACCCAAGTAAAGGCTTTGGATTACTGCTTTCCT
circ_000481	chr4	176515373	176517676	+	Zm00001eb191360	176515373-176515508,176517671-176517676,	2	exon	142	AA-CG	CGTCTACTCCTGACGAGAACCCTCCTTGCGCTCATCTTCATCGTGCTCGCTCTCAAAGCTTGGAGAATAATCAGGAGGGGAGAGAGGCTCGGATCGCCGGGTTAGCAAAACCTTCCCAGGAAAGCTGCGTCCTTTAAGCATT
circ_000482	chr4	166230384	166231008	-	Zm00001eb188660	166230384-166230428,166230897-166231008,	2	exon	157	GG-CA	TGAACTGGTTGACAAAGAGCCGGCTCCTTCGTTTGGCTCCCAACTCAGGAACAATGATCCCTGCTGCAGAAACAGACGCAGCTTCCCGCTGATACGACTGGAACCATACTGCGACGGGTGGATGGTCACACGCTCCTTCTCATATACCACATCCACC
circ_000483	chr4	177798871	177800556	+	Zm00001eb191920	177798871-177798945,177800492-177800556,	2	exon	140	GT-GA	TCTGCTGTGAAGAGAGCATGGCCCTGACCAGGCTTCATTGTGGTCAAGCATATGGCACATGTTTTCTTGAATGATTTGCTGCCGGATTTGGAGAGGCGGAGCCCGGCGGACGTCGGCGTCGGGGTGGTGGGCATGAGCAC
circ_000484	chr4	68472055	68475039	-	Zm00001eb177530	68472055-68472190,68472550-68472695,68472885-68473110,68474957-68475039,	4	exon	591	GC-AG	CTTCCTGGCAACATCAGTACCAGACAGATCATCTCTTGGATCTGGTTCTGTGTATCCTGCTTTTTTTGCTTCAGCAACAACATCACTAAAGGTTCTTGCTCCTTCGAAGTTGTTAAAAATATAACTTAACGTTCCACTGAAAATCCCTTCAATGCGCAATATCTTGTCACCTGTCTCTAGGAGACCACGCAGAGTGCTAATGATAGGGAGGCCAGCACCAACAGTTGCTTCATAGAAGTAATGAGTATATGATGCACGCTGAAGAGTTCTAAGTTTAAGATACCTGTCAAGTGGCCCTGAATTTGCTTTCTTGTTTGGAGTGATGACATGGATTCCTTTCTTTAGCCAATCATAATAGTGAGATGCAACACTTGTATCTGCTGTGCAATCTACCAAAAC…
circ_000485	chr4	153829842	153830047	-	Zm00001eb186000	153829842-153830047,	1	exon	206	GT-TC	GACAAGAAGGAACAAATACAACGGATACGGTTCTGCATTCAAGAAACTGGGGAGATCCCACTGTGAACACACCCCTTGTGTCAAAGTACTCCAAGGTGTTTGGTTATAAAGAAATAAAAAAAGGATAATATTGATCCTCCCATCTGTGCGACATGTATCTCTTGGCTTCGATGTGGTCCTACTCGCAACCATCTGTTATTATTCAC
circ_000486	chr5	122094973	122096293	-	Zm00001eb236070	122094973-122095096,122095519-122095613,122095708-122095834,122095993-122096096,122096187-122096293,	5	exon	557	GT-CG	CGTGAATTTAGGAACTCGAATTTTGTAAACGTCAACAAGTTCCATCATCAAGTCATACAGGTTAGTGAAGGCACTATCCAATATCATGCCACCAATAGAAGGGTCCTCTGCTCCATAGAGTAGGCATGTAACGGCACCCATTGATCGCCCCCAAAGGCCTATAGTGGAAACTTGTTTATTGTCCCGAAGACATGACACCGCACATTTGAGGTCTTCTTTCTCATGCCAACCCAAACTGACATAATCCCCGCCGGATAGACCTGACCCAGAAAAGTCAAGTGTGAAAACAGTGATATTTGAAGGAAGAAGTATAACAGCGGCTTCATTTGCATCTGCTCGGCATCCGCTATTTCCATGGCAATAGACCACACATGGGAGGGCAGTATTCTCTGGGATAAA…
circ_000487	chr5	122094973	122096293	-	Zm00001eb236070	122094973-122095096,122095519-122095613,122095708-122095857,122095993-122096096,122096187-122096293,	5	exon	580	GT-CG	CGTGAATTTAGGAACTCGAATTTTGTAAACGTCAACAAGTTCCATCATCAAGTCATACAGGTTAGTGAAGGCACTATCCAATATCATGCCACCAATAGAAGGGTCCTCTGCTCCATAGAGTAGGCATGTAACGGCACCCATTGATCGCCCCCAAAGGCCTATAGTGGAAACTTGTTTATTGTCCCGAAGACATGACACCGCACATTTGAGGTCTTCTTTCTCATGCCAACCCAAACTGACATAATCCCCGCCGGATAGACCTGACCCAGAAAAGTCAAGTGTGAAAACAGTGATATTTGAAGGAAGAAGTATAACAGCGGCTTCATTTGCATCTGCTCGGCATCCGCTGCATTGAGTCAAAGCAAAATCCTATTTCCATGGCAATAGACCACACATGGG…
circ_000488	chr5	66712470	66712895	-	Zm00001eb228780	66712470-66712711,66712804-66712895,	2	exon	334	GA-GA	TCGTAGATGCGCTGGAGCCCAGCAGTGGACACCTTGTTCCAGTAGCTTGGGTCTTCCTTGCACTTCTGGAAGAACTCGGCGATCTTGTTGCTTGCCTCCCTGCCATTCGTTGGGTTTATGTGGAAACCGGAGACACCGTCCACGATGATCTCCGCTGGCCCTCCCTGGTTCGTCGCAAAGGTTGTCAGCCCGCAGTTCATCGCCTCAATGACCGTCAGCCCGAACGCTTCATAGAGTGCAGGCTGAACAAATGCACCCCTGGTGTCTGCAATGCAACGGTACAGCTCACCGTTGCGGACACGGTCAGTCTGTGCCTTGATCCAGCGAATCTGTC
circ_000489	chr5	189085938	189086095	+	Zm00001eb247310	189085938-189086095,	1	exon	158	GG-AG	CTTCACACTCTGCAGCTTCGAATTCAGCTCGTCCTCATTATCCTCAACCTCTTCATCGTCATCATCAGGCTCTCCATCAGGCTCATTCTCATCTAGTGGGCCCAGCACTTTCAGGGGTTTCTTACCAGCCTTCAAGATTTCCTCCACCTCATCGATCC
circ_000490	chr5	39905353	39906033	+	Zm00001eb223950	39905353-39905414,39905631-39905700,39905946-39906033,	3	exon	220	GA-AG	CTTCAAATGACCACTGGCCAACTCCATCTGCTACACCAAACCAGCCATTGGCTGCAATGAAATATGCATCTTCTCCACCTGTTGCTACCTTTGACGGATGAGGCAATATTGCAGCACCTGACGATAACACACGTGTCCGTTGAGCTATTGGAATCATCCTATCAGAACTCTTCACCTCTGAAGTGTCATTTTTCCAATCCGCCTTGTTGCTAACTTGTTC
circ_000491	chr5	221119765	221120413	+	Zm00001eb257390	221119765-221119827,221120190-221120413,	2	exon	287	AA-AG	CTTCTTAAGCCATCCAGAACCTCCATATTATTTGGGTCACACTTCAGACCCTCTAGGTAAGTTGCCAAAGCATTTTCATAACTTTCCATCAGGAACTGGACTTTAGCTTTACGCACATAGCCCTTCAGAAAAGTTGGATCTAGTTCAATGCATTTCTCGGCATCCTCAAGACCTTGAGGAAAGGCTCCCAGATGGATGTGGCATTGAGCTCTGTTGCTAAATGCTCTTGGATCCTTTGGGTTCATTTTTATAGCTCGTGTGTATTGTATTGCTGCTTCATTGTATTT
circ_000492	chr5	17041474	17041680	+	Zm00001eb218530	17041474-17041680,	1	exon	207	GT-AG	CTTCCACAGTATTCTCTGCTGCATCTACAGTAGGGGCTTCCTCTTTCTTATCTTCAACTTCCTCAGTCTTCTCTGCAGCATCTTTCATCTCCACATTTTCAGCATCTTTCTTATCGTCAACTTCCTCAGTCTTCTCTGCACTTGGGACATCTTTCTTCTCGTCTTCAGCATTTTCAGCATCTTTCATCTCCACATCGGTACCTTTAC
circ_000493	chr5	67916262	67917670	+	Zm00001eb229120	67916262-67916333,67916414-67916618,67916700-67916784,67916883-67916981,67917068-67917149,67917228-67917287,67917380-67917427,67917504-67917670,	8	exon	818	CG-AG	CTCTATGAAAAGCTCTTGGACAGGTATCACAAAGGAGTAGTTGCCCACCATCTGAACAAATGCTGCACAAGTCATCACTTTGTCTGTTTGACATCTTTTGACCTTTCAAGAGTGAAATTGACAGCTCATGTAGTGAAACGCCGTTTGACATATATATGTTGTGGTAAGGTTTGCGTCGAGCAGCTCGACCAGCATGACCTTCAAACTGTGAAGGACACTGTGCTGCAGCAATGACAGTAGATCCCAAGTTCCTTTATATATCCATCCAGTAACCTCTTTCCACCAACATAGTAACCAACATCAGTGCCCTCTGGTAAAATGCCACTCATGAAAACGACCTTATGCATACCCTTATCCTTTCTTGTAAGCCTTCCTACACTTGAAGACTTTGCTCCTGGT…
circ_000494	chr5	67916262	67917670	+	Zm00001eb229120	67916262-67916333,67916414-67916618,67916700-67916784,67916883-67916981,67917068-67917149,67917228-67917287,67917380-67917427,67917569-67917670,	8	exon	753	CG-AG	CTCTATGAAAAGCTCTTGGACAGGTATCACAAAGGAGTAGTTGCCCACCATCTGAACAAATGCTGCACAAGTCATCACTTTGTCTGTTTGACATCTTTTGACGGTTTGCGTCGAGCAGCTCGACCAGCATGACCTTCAAACTGTGAAGGACACTGTGCTGCAGCAATGACAGTAGATCCCAAGTTCCTTTATATATCCATCCAGTAACCTCTTTCCACCAACATAGTAACCAACATCAGTGCCCTCTGGTAAAATGCCACTCATGAAAACGACCTTATGCATACCCTTATCCTTTCTTGTAAGCCTTCCTACACTTGAAGACTTTGCTCCTGGTGATGCACTCTTATATACCTTGGCAGATGAAGTTTGACTTCGCCCAACTTTGGATGAACTGATATT…
circ_000495	chr5	67916262	67917670	+	Zm00001eb229120	67916262-67916333,67916414-67916618,67916700-67916784,67916883-67916981,67917068-67917149,67917228-67917287,67917375-67917427,67917504-67917670,	8	exon	823	CG-AG	CTCTATGAAAAGCTCTTGGACAGGTATCACAAAGGAGTAGTTGCCCACCATCTGAACAAATGCTGCACAAGTCATCACTTTGTCTGTTTGACATCTTTTGACCTTTCAAGAGTGAAATTGACAGCTCATGTAGTGAAACGCCGTTTGACATATATATGTTGTGGTAAGGTTTGCGTCGAGCAGCTCGACCAGCATGACCTTCAAACTGTGAAGGACTAACCACTGTGCTGCAGCAATGACAGTAGATCCCAAGTTCCTTTATATATCCATCCAGTAACCTCTTTCCACCAACATAGTAACCAACATCAGTGCCCTCTGGTAAAATGCCACTCATGAAAACGACCTTATGCATACCCTTATCCTTTCTTGTAAGCCTTCCTACACTTGAAGACTTTGCTC…
circ_000496	chr5	176849072	176850102	-	Zm00001eb243850	176849072-176849111,176849188-176849349,176849485-176849901,176849984-176850102,	4	exon	738	AT-AG	CTTATCTTACTGTAAAACTTCTCTAGTTGCCGTTTCAAAGCTCTTCCTTAGTGTTGTAGTAACCCCATTCTCTGGAATCTGCAGTTTCAACAAAAAGCCTTCCTTCACGCTTGAAAAACCAGTACCTATTGTACTGCCTGTCTTTACCAAGTGGGCTGGATCGGATGGATAATTTCTCAATCTCCGTCTCAAGGTGCTGTACCAAGTGTCGTTTCCCTTCTGTTCTACTCCGAGAAATATTGCTCTTGTCATTTTCTTCTTTTCTCCTAACCAGCTCATCTACACCCCCATGACCAACTTGCACATCATCTGTCTGATTCTCCTGACTTTTCATGGCAATTTCAGTGTTAAGATTTTTCTCTTGTTTGTCCTTTCTGGTGTTCTCTCTTTTTGTTGCAT…
circ_000497	chr5	96001032	96003568	+	n/a	96001032-96001037,96003080-96003145,96003225-96003288,96003563-96003568,	4	intergenic	142	GT-AG	CTTTTGGTTGTAGAGCTTCCTTGGAGCATAGACTCAATTAACCATCATGCAAGTGACACTTCCATCCACCCTTGGACAAATCAATGTATCGCCACCGGAGCCAACTGTTATGCCGCAGAAACCTCCATCGATCAACCTTGAC
circ_000498	chr5	166488077	166488535	+	n/a	166488077-166488144,166488253-166488334,166488449-166488535,	3	intergenic	237	GA-AG	CTTCTTCTCTTCAACAGGAGGTGGTGCACTTGGTTTGGCAGCTGCTGGGTCTTCTGGTGGCAATCCTAGTTTCCTTCTCCTTTCAGCCTTATCTTCTTCTAATTTCTGGCGGATTTTTTCTCTAGCTCTTTTCTCCTCCTCTTTCTCAAGTCTTCGCAATTCTATCATGCGTTTCCTTTCATTTTGTTCCTCAATTCTTTTGGCTTCAAGAAGTTCTTTTCCGATTCGTACTCTTTC
circ_000499	chr5	224507961	224508514	-	Zm00001eb259140	224507961-224508154,224508221-224508514,	2	intron	488	TG-AT	ATATCGCAGCTGCCGCGCGACAGACGCAGCTACGCCGGCGGCGGCGGTAGCCGAGGCAAGTTCGCCTCCGCCATCAGCGGCGGCGCAAAACTTCGACCATGGGTCCAGCGAAGTCCATGTGTCACCCTTCGCTGCACCCACCAGACCGGCGGGCATCGTAGCTGGTACCACCGTCAGTTGCCCAACCTCCGCCCCAGCAGGCGGCAGCCCAGTCTGGGTGTCAAACATGGTGACTCCGCCCACCAGGTATTCGTCCACCGACAACTCCTGGCCTATCCCCCCGGTCCTCGACACCGCCGTCTCAGTTATGTGCGGCGGCGAGGGCAAACTTGCAGCGGCGGCCGGCACCGCGGAGGTAGGCATCATCGCGGACGGAGCGACCCCCTTCGCCCTTGGCCG…
circ_000500	chr5	6607918	6609076	-	Zm00001eb214210	6607918-6608081,6608157-6608219,6608682-6608853,6608974-6609076,	4	exon	502	GG-AG	CTGCAGGTTGTTCTCTTTTATGTAGTCCCACATTCTCTTCACAACATCCGATCGTGATAACATGCTCTCACCAGTGCCGATAAATTTCATTAAATCATCCGAAAGTTGAAGGGGCACAAGAAGACCAGATCCAGCTCCTGAAGAGCCACCCTTTTGCTTCTTTCCTTCATTCCTGTCTTTCTTTTGTGGCTTCTCTTTGGGTGTTGATCTGTCAGGAGAGACAGGACCCTCAGAATTCAATGGCCAGATATGCTTGGTCAAAGCTTTATTCATTTGGAACATATCAATGGAATTGACATTGAAGATCTTCTTCAATCTCTCATCAGGCAAAATCTTCCTCCTATTGTTTTGGTCTTGCAGATTATTTTCTCGAATATATGCCCAAAGCTTCTTGACAAC…
circ_000501	chr5	59300528	59300647	-	Zm00001eb227100	59300528-59300647,	1	exon	120	GT-AT	ATACCACCATTCCTCCGACTACATCAGTCAACACCATTTCAGTTGTAGGAAGTCCTCTGATGGCAACTGGTGCCACACATTCTGTAGTTACTGATGAAATTCCTTCCTGCTCAACATCAC
circ_000502	chr5	88134484	88134699	+	Zm00001eb233270	88134484-88134699,	1	exon	216	GC-AG	CTACCTTTGAGACCATATATAAAGATCACCAACCAGAGAGAGGCAACTGACTCACAACACAATTTGCAGCTACAAAACCATTGTATATGTACGGAGGTGCTATTCCTTGACGTCTTCAAAGAGTTCATCTTCGTCTTCGTCCTCGTCGTTTTCTTTGGCTTCATCAGAATCGTAGCTGTCGTACTGTAGGAGGCTGCCAAAGTCGCTGGATTGTGC
circ_000503	chr5	1404487	1404603	-	Zm00001eb210840	1404487-1404603,	1	exon	117	GT-AG	CTGAATCCCTGCTTTTATCTTTGCTCTTGTCTTTTTTCTTGTCTCTGTGTTTTTCTTTTCGGTCTTTCTTATCTTTGTGCTTATCCTTACTCCTGTCCTTGTCCTTCTTTTCTTTAC
circ_000504	chr5	6985142	6985452	-	Zm00001eb214440	6985142-6985207,6985360-6985452,	2	exon	159	AA-AG	CTTTCCGAACGGAGAAACCAGCTGCTGCAGAGCTATGATCCTCTCGCCGAGCCTCTCCCTCCTCACCCTGGGCCTCTTGTTCGTAGCACCAGCAGCCGTAGCAGGAGCAGCGGCGGACGCAGCCTTTCTCTGGTCGCTGCTGCTCCTTGATCCCTTCTT
circ_000505	chr5	225756907	225762129	+	Zm00001eb259590	225756907-225756912,225759278-225759370,225761747-225761876,225761978-225762129,	4	intergenic-genetic	381	AT-TC	GAGAAGGGCAACATTTGCCGCACTTTTGGAGCATCTGGCATCGACATAAAAAGAGAATTAGCAAAGAAAGATATCCTCCTCCTAGCATCCAGGTTTGTAGGGACATCCATAGCCGATTCCTTCACCGTGAGTAAAAGTCGAAGCCTTTTTATCTTTTCATTCCATGCTTGGGTTTTCTTTACAGGAAAATCAATAGCTTTCGTGAACAACTGATCTTGTTGGTCAAGTGATGTCATTCCTTCAGATCTTTTATTATTTGCACCATGTATCAATTCCAGTAGTTCGCTGAGCTGGTCAACCATTATGTCCCTTGTAACCACTTCAAGCATGTCTTGGAACAATATGATGATCTGATCATGATCTTCTTTGTTGTTATTTGAT
circ_000506	chr5	193917759	193917980	+	Zm00001eb248730	193917759-193917825,193917921-193917980,	2	exon	127	GT-AG	CTGTCTCATGATAGGGTCGGTAAGAATGTTCTGGATCTCTGGGTCTTGCATAGCTTTGTTCTGTCTTTCTTGCAATTCATCCTGACTTATTTCACCTCTGTTAGCCTTGTTAATTTGTTCAATGCAC
circ_000507	chr5	10144129	10144349	-	Zm00001eb215750	10144129-10144158,10144259-10144349,	2	exon	121	TT-AA	TTGGCCTCCCTTGCTCGTCCCGCTCTGGGCCTGGGGAGGTGACGATCTCCTTTAGCTTGATAACGTTCTGGTGGTGAAGCTTCTTCAGGATCTTGATCTCGCGTATGGCGGTGATCGGGAA
circ_000508	chr5	62315472	62315720	+	Zm00001eb227830	62315472-62315720,	1	exon	249	GT-AG	CTCACCGCCAAGCACACCCGCTTCCTCCTCGTCGGGGCCAAGCTCTCCGCCGCGCTCGTCGACGCCCAGGCGCCCCACTCCCCTGACGACGACGACAACGACTGCGGCCGCGGCAACGGCGCCGCCGCCGAGCCCGACGCTGTCCCCGCCGTCTGCGCGCAGGGCTCCTGCGCGGCCAAGGCCTCGTCTCTTGAGTCCGGTGGCGGCGGCGGCGGCGGCAGCGGCAGCGGCAGCAGCATCTCCGAGTAC
circ_000509	chr5	122068986	122069846	-	Zm00001eb236070	122068986-122069084,122069766-122069846,	2	intron	180	GT-GG	CCCATATGCCTGGTGAATACGATCACAATGGTGAGGCTGAATAAACATATCATTCAGACCATGTCCAAATAGTACAGGGATAAACATCTTGGGAGCCAACCTTAAAACATTTAGATCCATTATGTCAAACTTAGCTCTTTTCTGAATGATTCGCCGCATGTACTGTACAGCCATCTTAAC
circ_000510	chr5	122068986	122069846	-	Zm00001eb236070	122068986-122069084,122069175-122069225,122069766-122069846,	3	intron	231	GT-GG	CCCATATGCCTGGTGAATACGATCACAATGGTGAGGCTGAATAAACATATCATTCAGACCATGTCCAAATAGTACAGGGATAAACATCTTGGGAGCCAAAATGAATGACTCAGACTAATTAAGGACCAGAGAGGTGTAAAATTGTCAATCCCTTAAAACATTTAGATCCATTATGTCAAACTTAGCTCTTTTCTGAATGATTCGCCGCATGTACTGTACAGCCATCTTAAC
circ_000511	chr5	154799790	154800843	+	Zm00001eb239530	154799790-154799864,154800573-154800659,154800809-154800843,	3	exon	197	TC-AG	CTTGCTCATTTCTTCTTGGCGTCCCCAGCCTTTGTCTTCTTCACACCGCGGATCTTCTTCGCCCTGTTCTTCCTCTCCTTCATCTGCTTGCGCGACTTCTCCACCTTGGTAGCAAGACCGTTCCTGATAAGCCTGTACTTGGGCTCGAACTTCTTGGCTGAGTCGACGTTGTCGTAGATGAGACCGAATCCGGTAGA
circ_000512	chr5	133906088	133906364	+	Zm00001eb237090	133906088-133906364,	1	exon	277	TG-AG	CTTCCAAACTAATATACCCTTGCTCCGTAGATATTGAGCTCTCATGTCAACTGTACACATCCATGAATCACTAACAAGCTGGACACTGGGGCCACCATAAACATTAACCAGTGTTTTGTAGGGAGGTGGCCCATATTTTCTCTCGTCAGGAAGGTAGAGAGCGCCATATAAATTGGTCCCATCCTTCGCTGTAATTTCAACTATCTCTGGAGACAACTGCTGGAACTTTTTAAGTGGCGGAATAGTCAGTGGCTGCTCAAACAGGGGTATAATTACA
circ_000513	chr5	40422045	40426584	-	Zm00001eb224050	40422045-40422154,40422232-40422360,40426352-40426418,40426502-40426584,	4	exon	389	CT-GG	CCTTAGTCTGTATTTGTACACAACATAACTTCCCGCTGCCACAACAGCAACAACTATCAAGATACCCCACACTGCAGCCCATGCTGCTTTAGCCTGAACTGCTGTCTTGCTTATGCAGGTGTCATGCTCTCTGATGTACAAAAGGTCACCACTGCAAGTGCAGTCATAGCCACCCCATGTATCTTTGCAGTTGCATTCAGGACACTGACAAGCTTTTTTCTCCTTGCACTCATCAATGTCTTCACATTTTTTAACGCCGTCCCCTCGGAAACCAGCTGGGCACAGGCATTTCCCATCTCCAGATTCCTGGCAAGCAGAGAATGTTTTTCCGTTGCGAGTTTCATGCCAACATCCTCCATGGTTTATCAAGCATTTTCCTGGTCCAGCAG
circ_000514	chr5	221446999	221447257	-	Zm00001eb257520	221446999-221447150,221447156-221447257,	2	exon	254	GA-AA	TTGGAGGCCGCGGGCTTCTTCTTGGGCGGCTTGATCGCCACGCGGAGCGAGGCGTGGTCGTCCATGACGTACTCGTAGGACCCCATGGAGTGGCACCGTCTCTGCCCGAGACCGAGACCTTCCTTGGCACTGGCGTCGACGTCGACGTCGCCCGCTGGTGCCTGCTCCGTCCGCCGCCTTGGCGTTGGCGTTGGCGGTGCTGCCTTCGACGCACATGAACTTCCCCAGCTTCACCTCGACCACCTCGTCCGCTC
circ_000515	chr5	54053419	54059354	-	Zm00001eb226150	54053419-54053465,54053715-54053734,54053844-54053997,54058949-54059016,54059095-54059158,54059236-54059354,	6	exon	472	AA-AG	CTCAAGGGCACATATGTCATCATCCTGGTTAACCAGTGTTAGAAGTCCATAATCTGTATGAGCTCCACAGCCAGTATCAGTGCGCTGCTCTTCTGGAATATCTACGGGATAACCAATCAACCTTAACACCCAGAAAGGATCTCCAGCTGTATCCCCTTCAAAAGCATCAATTGCCCCTCCCAAAGCCAAGGCTATACCTCGCATTATCTTTCTTGAAATGTCATAAGTTAGATCCTTCCATTGGTTTAGCGAGATCTCCATATTTGCCAGGTCTAATAGGAGTATAACAATCGATTGCTTCATGCATATCAGGCTTACCCTTGGTAATATTTTCCCCTATCCTTTGATACCCTCTATATCCACTTTGAGGTGTCATCTTAATTTTTAATTTTTCCTCAT…
circ_000516	chr5	218957254	218957439	+	Zm00001eb256170	218957254-218957439,	1	exon	186	AC-AG	CTTCTTATCAGTTGTCTTCTTGTCTTCATCTTCCAGTTTCTCTGCTGCAATAGTTGGCCTCTGTGGAAGTTGCTTACCAGCTCGTGGTCCCCTCTCACTCAACTTGCGTTTGAATGATATCAATGTTCTTGAGCTGTCAGCTGTGTTTCTATCAACATCTCTGTTTTTCAGAGAAAATCTTATGGT
circ_000517	chr5	137220122	137225877	-	Zm00001eb237390	137220122-137220260,137225872-137225877,	2	exon	145	GT-TG	CAATGGTACACCACTTTTAGCTCGTTGTTCCAAATACGATGAAGGTTTGAAGAAGGGACCATACATTTCGGCCCACTTGCTTAGCTTCGAATGTATGTAAGGCGCTCCAACAGTGTCAGCCCAGAAGACAAGACCACCCTGGCAC
circ_000518	chr5	224210618	224211012	-	Zm00001eb258950	224210618-224210719,224210935-224211012,	2	exon	180	GC-CA	TGGTTTCAGTTTCGCCAATCCAGATGCTGTGGTCCCTGGCCTAATCCCATCATCAACTGATATCACAACTTCCTTCTCCTCTCCAGTTTTAGGATCAACGATCTTTGTTGGCACGGGGACGATCTCATCCTTGAATTTTCCAGAGGCCGTGGCTGCAGCAGCTCTCCTATGAGACTCAGC
circ_000519	chr5	67413019	67420611	+	Zm00001eb229050	67413019-67413024,67419880-67420024,67420462-67420611,	3	exon	301	AA-AG	CTCTTCATCAAGGCACAGTACTTCTTGAATCGATGACTTTTTACCACCATACAATAGTTTATGTATTTGTTTCTTCCACAAATATCTGCTCAAAACAGACTCAATTCTGCAACTGACATTGTCATCATACAAGCCAGAAGCTGATGTCGCCTTGAGAGCAACTAAAAGAGATTTGAATATGACAGTAAGATCTTCTCCATGATAACAGTCTGAATCATCCAGAATTTGCATCAAGTAGGCATTCAAGTTACGAGCCTTATCAACAATTTCTTTTAGCAAATTAATTTCCTCAATCACCATT
circ_000520	chr5	10142889	10144349	-	Zm00001eb215750	10142889-10142894,10143911-10144023,10144129-10144158,10144259-10144349,	4	exon	240	TT-CA	TGTTTACTTAATCTGTGGCACAGTGAACCGCATTCCTGGTCTATCAGCAAGCCCAGTGAGGTCATGATCCATATACTCGAAAACCATGTAAATGCTCCCCTTGTACTTGTTGCCGTCAATTGGCCTCCCTTGCTCGTCCCGCTCTGGGCCTGGGGAGGTGACGATCTCCTTTAGCTTGATAACGTTCTGGTGGTGAAGCTTCTTCAGGATCTTGATCTCGCGTATGGCGGTGATCGGGAA
circ_000521	chr5	216470496	216470672	+	Zm00001eb255160	216470496-216470672,	1	exon	177	AG-AG	CTTTTCTTGTGTTGTGCGTCCCTGCTGCTAAAAGAAGAACCAGAGAGATCAGAGAACAAACCTGCGTCGCTGCGTCGCGGATGATTTTTTTTGCTCGGATCGCTCAAGCCTCACCGTGGAGATGGATGGGATGTGGCTTTGGTGTTCTTGTGGTGGGGGTGAGGCGTGTCTGTCTCT
circ_000522	chr5	141841012	141841193	-	Zm00001eb237920	141841012-141841193,	1	exon	182	GC-AG	CTCCTCCGGCACCGGCGCCGCTGGACCCCGGAGCGTAGTCATCCCCGGCGACGACCTCGATACGCAATTCCCGGTCGGAGAAGTTGACCTCGTTGAAGGCGAATTCAAAGCTGGGCCCCCCGCCCCCGGGCGAGAAGTCCGGGTCCATCTCCGCCGCCGCGGTCGCGTGCACGCCGACCAGC
circ_000523	chr5	191191232	191196682	-	Zm00001eb247890	191191232-191191429,191196677-191196682,	2	exon	204	AT-AG	CTTCTTATTTATTAAAAAGTTGAACTCCTCTTCAAGCATAGACAGAAGCATACTTGGAACATCTTTCATACAAGTTGATAGTGTCGCAACCAAACGAGAATAGTAAGGCAACAGTTCCAGTGAAGTCCTATTAACATTGAATAAGGCACGCGCAAGTTTCTTTCGATTTGCTTTAGAATTTAGGTAGCAAAACTCAACTTGCAT
circ_000524	chr5	4651578	4651818	-	Zm00001eb213060	4651578-4651616,4651699-4651818,	2	exon	159	AT-AG	CTCGTGAGTCGCTAGAGCAAGCATAATCAAATCAGCGTCCAGGCCATATAAGCAATGGCGTGTATTGGGATCAAAGCCAGGAAGATTGCGCTGCAGGCGGATGTATGACATAATTTTGTGCTCTCCCTCTCCAGGGACATTGGAATCAGACAGTATTAT
circ_000525	chr5	219069406	219069698	-	Zm00001eb256230	219069406-219069698,	1	exon	293	GG-AG	CTCCGCCGCGGCCACATTCATGCTGCTCTCCAGCACGAGCTCCTCCTCCGCCACCTCCGAGGTCCGCGGCGGCTCAGCGGCACCTTCCTACCTCAGCCCCCCGTACCTGCTCAACTCCACCTCCCACCACCCCGCCGCTTCGCCGCTGCTCGGCGCACAACCGTCGTCGTCAATGCCCAGCGCCCCTGCTGGCGTGGCCAATGGCGTGCAGCATCTCAACATGTTCGGGCATTCGTCCATGCTCGCTCAGCAGGCGCCACATTTCAGCAGCAAGTACCCGTGGTCATCGGACC
circ_000526	chr5	22327421	22327609	-	Zm00001eb220030	22327421-22327609,	1	exon	189	GT-AT	ATCATGGAGGCCGTGGGCAGCCCCAACGTCTCCGACTTCTTCCCGGCGCTCGCCGTTGCCGACCTGCAGGGCTGCCGGCGGCGGCTGGCGCGGCTGTTCGCGCGGCTGCACCGGATCTTCGACGAAGAGATCGACGCGAGGCTGCGTGGCCGCGACGCTGGCGAGCCCAAGAAGAACGACTTCCTCGAC
circ_000527	chr5	162042689	162042946	+	Zm00001eb240700	162042689-162042946,	1	exon	258	GT-GG	CCAATCCAAACCAGACAAGCAAGGAATCCCCCGATGGCTCATCGCGTTCTCCTCCTCCTCTCTCTCGCGTCGGCCGCCGCGGTTGCCGCCGCCGTCGACGCGGAGGACCCGCTGATCCGGCAGGTGGTTCCCGGTGGAGATGACAACGATCTGGAGCTGAACGCGGAGTCCCACTTCCTGAGCTTCGTGCAGCGGTTCGGCAAGTCCTACAAGGACGCCGACGAGCACGCGTACCGGCTGTCCGTTTTCAAGGCCAAC
circ_000528	chr5	76702784	76703044	+	Zm00001eb231250	76702784-76703044,	1	exon	261	GT-TA	TAGATCAGAACAACAGAATCAACAAAGAAGATGCGGCTGATGGTTTAAGTCATGGAGAGAGCACAACAGAAGACAGCTGCCTTCTGAAGCACAAGAAAGATGAAGAATCCAAGGGTGATGAACAACAAGATTTAGGTGTTACAGTGGATGATGACTTGGTGCAGGAAGACACGCTGAAAACTGACAATGCTATTGAGCAAACAGATGATGGTCAGCAAGACCAGGATCAAGAACCTGAAAAGGCAAACGAGAACACAGAAC
circ_000529	chr5	166018581	166021230	+	Zm00001eb241420	166018581-166018637,166019752-166019858,166020146-166020224,166021225-166021230,	4	exon	249	GT-AG	CTATCACTGGATAGTACTGGGTTTTCTCTTCCTTTGAATCATCAGAACCATTTGAGGATTTTATGAGCACATCAGAAGTCTTTGCCAAGGGTAGTGGATGCACACTGAATGGCTTCACATTGGAGTGTGCAACTTCCACAGTTTTTTCATTTTCAATCGGCTTAGGAAGATCAACTGGCAATGAGTCTTTCCCAGAACAAAGACCCAATAGTCGGCGTCGCCTCAAGCTAACCATACTTCAAATGCCAC
circ_000530	chr5	1624585	1625669	+	Zm00001eb210930	1624585-1624664,1624791-1624941,1625365-1625426,1625607-1625669,	4	exon	356	AT-TT	AATTCGAACATCAGCAGCAGTATATTTCGAAGGGTCTGAAGGTGGCTCTGAACGTGGCGCCAGCTTTTTCAGAGCTTCTGCCTCTTCCAAAGCTTTTTGAGCTTCATCAACCATGCCTTGTTCACCAAGCTCTTCAGCTTTCTTAAGCTTTTCGTTGATAATTTCTTGAGTACGAGCATCAGGTGGAGCTGGTGGTGGAACTGCTGCCACTTGAGGTGGAGCAGGCTGAGTTAATGAAGCTCTGTCCTTGTTAAAAGCATCAAGCAAGAGGGTAGCCTGCATATCAGCTCTTTTAGCTCTTAGCTCTTCCACTACTTCCTGGGCCTTTATTTTGTCATCAGTTCTCCCTTCAAAAT
circ_000531	chr5	197530562	197530955	+	Zm00001eb249900	197530562-197530620,197530801-197530955,	2	exon	214	TT-AA	TTGAAACTGCGTCCATTGTTTGTCACCAGTATATACTCAGGAATTTGAACCACAGAGGTATCAGTAGAATGCAGTTGCAGGCACTCCTCAAAAGGAACCAGTTGCTCCAAGTTACTCGCGCCCTCATGAAATTTTGGGTCAAGTTGCACAGTCCACTCACTTGTTTGGCAGCATGCATTGCCCCCGCGGAGGTATATTCCTCTTAGTTTTGGAA
circ_000532	chr5	192497827	192497917	-	Zm00001eb248250	192497827-192497917,	1	exon	91	AT-AC	GTTGAAACCAGAGACCGTGTTGTGTCGAGGCGATGTGAGCTCCTCAACAGTGGCGGCGGCTGGGCTGGAGGAACCCTGGTTAGAAATGAAT
circ_000533	chr5	167285348	167285477	-	Zm00001eb241810	167285348-167285477,	1	exon	130	GT-GG	CCGCTCCCCCGTCATCGCCAACCACCTCTTCCGCCACGAGCAAGGGGAGGCCTTTGCGGCCTCCGGCTACGCGCGCTCCTCGGGCCGCGTCGGCGTCTGCATCGCCACCTCCGGCCCCGGCGCCACCAAC
circ_000534	chr5	66236806	66237598	-	Zm00001eb228700	66236806-66236811,66237076-66237144,66237251-66237376,66237489-66237598,	4	exon	311	TA-GA	TCTGTCCATCATTGTTGGCCATATCAAGAAAAGCCTGAAGCTCCAAAGCTTTTCGATAGTACATCATCCCTCTTACAGTTCTTGTTAATGTCTGCCCCCTATATGACACCCAAAGACAAAGCTTCTCTTCCAGCTGTTCATCTTCACGGAGTACCTCTTCATTCTTGCAGCCCACCCTTTCGAGGAAATTTTTCCATTCATCTGGGTAAATTTTTTGCAAGTAGAAAAGAATGGAAACTCCATCCTCATTTCGCTCTTCCAGATTTTGTAATGAAAACAGAACATCTTCCTTGTAATAAGGAGTCAAGATA
circ_000535	chr5	186878203	186878897	-	Zm00001eb246710	186878203-186878334,186878551-186878675,186878812-186878897,	3	exon	343	AT-TG	CATGGAAGCTTGAAGGTGTCTCTCCAGCTACCCTGCTTAGCACAGTTCGCATGTATCTTGTTCAGGCGCACAATTATCTCCGCGAATGTTGGCCTGACGGAAGGCATCGGATCCCAGCATTCTTGTATCAACTCTTTCACATCACTGGGGTAGTATTTCGGTTTATTCTTGAATGGTGGTCTCAGCCCCTCTAAGCAAATCATCTTAGCTGCTTCCTCTTGTGGCTTTGGGTGAAAAGCAGGAGCTCCTTCAATCATCTCATAAAGAATGAGACCAAATGCAAATACATCTACACTTCTGTCAAATGGTTCGTTTTTGTAGACCTCGGGAGCGATGTATACAT
circ_000536	chr5	128990492	128991437	-	n/a	128990492-128990565,128990643-128990741,128991062-128991145,128991246-128991437,	4	intergenic	449	GA-CG	CGTGCTTGATGCAATTGTGCAGCTTTGTTCTTTGAAATGAAGTTGGTCATCTTATCATGTAGCCTCTCACTTGCATCTGCTATATGTGCATGCCTAAGCTCAAGCCAGACAGGGTCATGATCCTCCAACAGGACCTCCTTTTTTTCAGTTGCCGACCCATTTTTAGTTGGAACCTCATGAACATACTTGTTGCCATCCATACAAAGCAGATCATGACACATAGCATCATAAGTCCATTCATGAATAATTGGTGCAATCTGATCTATTGAACGGTCTACTATAAGTAGCTCACAAGTTTCTGTTTGAGGAAATTCAGGTATTGTCGTTTTATATTTCGCAAGACAATTCCATACACTGGCAGCAAGCTTTGTGGGGACTAAGTCTCGTAGTGTTGTCATT…
circ_000537	chr5	40426352	40426584	-	Zm00001eb224050	40426352-40426584,	1	exon	233	CT-AG	CTTCACATTTTTTAACGCCGTCCCCTCGGAAACCAGCTGGGCACAGGCATTTCCCATCTCCAGATTCCTGGAAAGAAAAAAAAGTTGGGAAGCAACAGACAGATATTCAGTAATAAAGCCATAGATCATGTAATAAAATCCTAAACCTACCTGGCAAGCAGAGAATGTTTTTCCGTTGCGAGTTTCATGCCAACATCCTCCATGGTTTATCAAGCATTTTCCTGGTCCAGCAG
circ_000538	chr5	146901573	146901971	-	n/a	146901573-146901696,146901811-146901971,	2	intergenic	285	TT-TG	CAGAAGTTCAGCCAGCTGGTCAAATTTTTGGAACAGTGAAGGCAAATGATTCATCCGAAAATCAATCACCAGGCTTGAATTTTGAATACTCTTATCTATTTCATCAAATATGGCAGCTACCACCCTCCTCTCTGTCTCCCCGATAATAAGAAATCTGAAAATATTTTTTGTCAGTTCATAGAATTCATTTATAGAACAAAACATGTAGTGATCCTTCTTAATCATCCAGAAGAGTTGAGCACTTTTTCCAGTAAAATTTGCTGCCATATCCACTGCTTCTGAAAA
circ_000539	chr5	9064205	9064318	+	n/a	9064205-9064318,	1	intergenic	114	GA-AG	CTGCGGATGTCGGTGGTAAAGAGAAGCACCCCCGCGCCAACCACGGCCACCGTCACGATGAAGTTAGTCAGCGCCATCGCTCTCTAGTTCTGCCGTCGAAATCGGGAGGCGTTC
circ_000540	chr5	224326158	224326464	+	Zm00001eb259050	224326158-224326464,	1	exon	307	GC-AG	CTGCAATGCATCAGCAAAGCTCTTGCGCCGTGATCCATGGCCACTGACATCTGACAAGCCGATGAGCCCATCAGCGCCTCTCCCGAGCCACTCCGACGACTGCTGCCGTGCGAGCCCATTCCTTTCACCCCTCCCCACTCTATGATTCAGCAGCGCCTTCTCTCCATGCGCCCCTGGCTGCACCGAGAACAGCGAGTTTCCACTCCCGACCTCCGAAGGCCTCCTCCTATCCCCGATACCTCCAGACACAGCCTGGAACCGCTGCGCCGCACGCCAGTCCTCTTTGGAGACCATTGGTGGCGGAAGC
circ_000541	chr5	54053419	54053997	-	Zm00001eb226150	54053419-54053465,54053715-54053734,54053844-54053997,	3	exon	221	AC-AG	CTCAAGGGCACATATGTCATCATCCTGGTTAACCAGTGTTAGAAGTCCATAATCTGTATGAGCTCCACAGCCAGTATCAGTGCGCTGCTCTTCTGGAATATCTACGGGATAACCAATCAACCTTAACACCCAGAAAGGATCTCCAGCTGTATCCCCTTCAAAAGCATCAATTGCCCCTCCCAAAGCCAAGGCTATACCTCGCATTATCTTTCTTGAAATGT
circ_000542	chr6	48040493	48040638	+	Zm00001eb267140	48040493-48040638,	1	intron	146	GC-AG	CTGTTACTATGCTGTTGTTTGTGCCTGGAATGTGTTGGTTTAACTATGCTATGCTTGTCATTTTAAGACCTGGCCTGTTACTATGCTGTTGTCTGTGCGGAATATGTTGGTTTAGCTATGCTATGCTTGTCATTCTAAGACCTAGC
circ_000543	chr6	57937574	57937663	-	Zm00001eb267970	57937574-57937663,	1	exon	90	GT-AG	CTCCTCGCCCTTCTCAACTTCTGGCTCCAGTTTCTCCTCCTCAGTCACCGGTGGCTCGGCATCATCTGCCACCTTATCCACAACCTTTAC
circ_000544	chr6	102318545	102318688	+	Zm00001eb274090	102318545-102318688,	1	exon	144	GC-AG	CTCATCACAGAGTGGCTCAAGATTGAGGTCCTCGTCACTGATTTTTCTATAAACCTTATTTGCTGCCTTCTTAGCTTCAACCTCTTGGTCAGTTTCACTTTCTATGCCACTCTTTCCTTGGGATATGTTGGTAACTCCATCAGC
circ_000545	chr6	144532047	144532151	+	Zm00001eb284380	144532047-144532151,	1	exon	105	CA-AG	CTTTGTACACAGTGCCTGATTCTCCCCTCCCTAGCTCAACCTTGAATTTTCTGGTCGCCTTCACAAGTTCCCTGTAGCTGTACCTTCTAAAATTACTAGTCATTG
circ_000546	chr6	175930380	175930489	-	Zm00001eb295800	175930380-175930489,	1	intron	110	GT-AG	CTTCGACCTTCTACAAGAAAACAAACACCAAAAATCCATAATCCCCACCATTCAAAGTTGATCTAGTGCCTAAGATTGCAGTTCCCACCATTCAAACTAGATCTAAATAC
circ_000547	chr6	128711964	128714738	-	Zm00001eb280650	128711964-128712074,128712168-128712253,128712340-128712484,128712813-128712910,128714597-128714738,	5	exon	582	GT-AG	CTGAAGAATAGCAGGACTCTTTTCAGCCTCTGCTGCTGCAACAACAGCTTCAATTCCCTCAAGGTTATACACATTGAAAGCACCAACAGCATAACCGCCCTTCTCCGCATTAAGAAGAATTTCTTTTGTAGAACTTCTAGATGGGGAAGCCCAACTTTTCACCACTTTAGCAAGAGCACTGTTATCACCAACATTACCAGGAAAAACAATGTAAGGGACCCCAGGAAATCTACTCTCAGGACCAAGCTGCCACAAGGGTACACCAGCTAATGCTTGTCCCATGACTTTGGCACGTTTAGCTTCCAGCGCCTTTGTAGCAATATCAGATGAAGTGATTCCTCCCTTTGCAATGATATAATGAGGTTTACTATCAATCCTTCTCACAATCTCCACTAGTGC…
circ_000548	chr6	164537350	164694408	-	Zm00001eb290370,Zm00001eb290380,Zm00001eb290390,Zm00001eb290400,Zm00001eb290410,Zm00001eb290420,Zm00001eb290430,Zm00001eb290440,Zm00001eb290450,Zm00001eb290460	164537350-164537463,164537546-164537771,164694403-164694408,	3	intergenic-genetic	346	AT-AG	CTTTCATATGGTTCATGACACGTGAGATCTCAGCTTTGGCTGGGGTTTTCTTTTCATGGTCTGTCACCAGCTCAACTCCAAGAAGGAAGCCTTTGCCCCTAACGTCACCGATGATCTCATGCTTGTCTTTCAGATTGTTAAGCTGTTCCTTTAGGTAGGAGCCCACAACAAACGCATTCTCCTGGAGCTTCTCCTTCTCCAGCACTTTGAGCACCGCATGCCCGCCTGCAGTGCTGACAGGGTTACCACCAAAGGTATTGAAGTAGCTTCTGCGGGTCAACACCTGAGCGATCTCTGGCGTCGTTACTACAGCTCCTATGGGTATGCCATTCCCGATACCCCATAT
circ_000549	chr6	116805511	116806001	-	Zm00001eb277950	116805511-116805516,116805715-116806001,	2	exon	293	GT-AG	CTGCACCTAAGATTTTGAAGACCCCACCAAACACAGAAGAACAATTTTGCAAAGAAACTTTTTGATCGCGATACATTTTTTATAGCTGGTGCATAAATCCCAAAGTACGGATCTGGAAGGTTTGACTGATTACTTAGTAGGCAATTTGTAGTTAAGAAAGCATTTTTCCCATCCTTATCATAATCTCCACAGTACAAATATGCAGGATCACATGTCGAATTGCCTCTACAATACTGTCTCCAGCAGGAATCTTGGCGTTGAATAGAAAGCAAGTACCAAAGAGCTCCAAGGAC
circ_000550	chr6	175330448	175331230	+	Zm00001eb295490	175330448-175330479,175330752-175331063,175331157-175331230,	3	exon	418	GT-AG	CTGGAACACCTTACCATGACAATCTTTTTTTCTTCGATATTTTCTTTCCTCCTGATTACCCCCATGAACCACCTTCTGTTCACTATCACTCTGGTGGTCTCCGCCTGAATCCAAATCTGTATGAGTCGGGAAAAGTGTGCCTCAGCCTCCTGAAGACATGGACAGGCACTGGTAACGAAGTGTGGAATGCTGAGAGCTCAACTGTTCTTCAGCTGCTGTTATCGCTTCAGGCCCTTGTTCTCAACGAAAAACCTTACTTCAACGAGGCGGGATACGACAAATTTGTGGGCAAGGCTGATGGAGAGAAGAACTCCATCACGTACAATGAGAATGCCTTCCTTCTGTCATGCAAATCCATGATGTATGTTTTACGCAAGCCTCCAAAGCATTTTGAGACGT…
circ_000551	chr6	121477276	121477648	+	Zm00001eb279060	121477276-121477485,121477572-121477648,	2	exon	287	GT-AG	CTTGCTTTGAGATACAGCAAGTTATGATGGATGGACTCGACTGCAGCTTCAAGTTTCCTAAGCTCTAGTTCTACGCCCTCAATTTTCTCTTTCTTAGCAATAGTATCCCAGTCCTTTGCAGCAATCCCTATCTTCCAATCAAGATTTAGAGATGTTCCTGATCCTTTCTCCACGCTGTCTATCCAGAAACATGCAAGGTAGTTTCCAGCTTCTGAAGTGGTGAATGCAAACTGGCCCGTTGTAGCATTTTCATTATGATGCACAGTATTGCCATAGGGTGATGTAAC
circ_000552	chr6	113075663	113075932	+	Zm00001eb276870	113075663-113075932,	1	exon	270	GA-AG	CTACCCAAGTTGTATTCTCTTGTTTATTTTTGACACTACAGTTGCTATGTTCTATCAAAGCGAAGGCCCCATCCAAAAACCCACCACCATGCTTACGAGGGGTATGGTTTTTCCCCAGTTACCAGGGTGATGACTCTTGAAGCCATGATACCCTTGGATCGCAAACAGGTGTTGATGGCTCTGCAGGGAGAAACTGAATGACCGTGGCAGCCCTATGGGCAATCTCCTCGCAATAAGAACCACAAGCACCACAACAAAGCACATGAGGTC
circ_000553	chr6	163362774	163363086	-	Zm00001eb289880	163362774-163363086,	1	exon	313	GT-AG	CTGAACTAATGGGATTCCATAATAAATGTTTGAAAGGCAATCCCATACCAAGAACAGAACTGCCTCCAGAATTATGCCTATGAATTGGCAGATAAGACTTGCGGAATGATCTTGGTATCGAATTGCTGACGCATAGTATGGCACATATGACCAACACAATTGAAATCAGAAACAGTACTATGAGAATATTTGGATTTATCTCCCTGTGCAGTATTCGGTATCCTTGAATATCTAGTCGTGAAGACAATGCTTGACCAGCCTCCAGCAAAGCAACTCCATGAGTCCAAGTAATACTGCCAGAGCCAATTATCAC
circ_000554	chr6	39240573	39240684	-	Zm00001eb265810	39240573-39240684,	1	exon	112	TC-AG	CTGACTGTATGAGAAATGAGCAAATACAGTTTGTTGTCTCAAACTAAAATATAACAGTTACAACCGAATCGTGCGGCCCAAATTTGATCAGAATTTCTCAGTTCAGGGGGGA
circ_000555	chr6	151125951	151126367	-	Zm00001eb286110	151125951-151126124,151126227-151126367,	2	exon	315	GT-TG	CACTGAGCGTTCTGGCAGAAGACAAGGTGTCACCTCACAATAGTTGGTCTCATCATAATAATCCGTTTCAGCAACTGTCACTTCCAATGGACAATACACTGGAAGTTCTGTGTCAATGTCCACTGTCTGAATCCATCGAGGCTCTGTAGCTATTACATATAGGTGCCTGAATGCCTGGAGATGGCAGCGATTGTCATTTGGTCCAGTGGGTAAACGTGGGTAAAGTGAGATTAGTAATGCAGCAATTGCACTATTCTGAGTTGAAAATGTGTGTGTCCCACCTCCAAGGAATAAGAATCCTATTGCCAAGCTTAC
circ_000556	chr6	167506116	167506294	-	n/a	167506116-167506294,	1	intergenic	179	GT-AG	CTCCAAAATGCTTAAATCTACCTCTATTCCTCCAAAACATCACCTGATCCAGCTAACCACATTTTTCTAATTAAGGGCAATCAAACTTCAAATTAGTCCGGTGGCAAACTTCACCCACCATTAAGTGACATCAGAACAGCCATATATAACATATAAAAAAACAACGAACATAGTCAAAC
circ_000557	chr6	151299076	151308664	-	Zm00001eb286120	151299076-151299218,151308659-151308664,	2	exon	149	GA-AG	CTTGAATAAGATTATCTTGTTTGAGGAAAATTTCTCTGAGCCTACTTTGGCCACATGGATTGTATTTTAGATTGAATTTGTCAAAACGATGAAATGTGCTTTTGTCTGCATGGACATCTAGCAAATCAACATTCAGATCATACTCCTTC
circ_000558	chr6	146430517	146433344	+	Zm00001eb285000	146430517-146430605,146432855-146433019,146433267-146433344,	3	exon	332	AT-AG	CTGTTCTGCAGTCGCATAAGACCCATAATGCACATCTTTACGTGACAGTGCTTTCACCGCGGCCAAGAATGACTGAACCTTTTCAACTACCGAAGTCAACTTGAAAGTCAGATACAGTCCAGTGGTTAAAGATGAGAAGAGACTCCCATATTCCTTGTTCAGAAAGAAACGATACCAAACAGAAGTTGGCAACAAAGCACGATAAAGAAGCAGAAGGTACTCCACAAGGGTTAACATTTGGCCCTGTCTACGGTAGTTACGACCTCTGCAGTTCTTGTAGTACAGAAGCAGCATGCACTTGACAGCCATTGCAGCTTGGCGAACCATTGTAT
circ_000559	chr6	177729579	177729766	+	Zm00001eb296870	177729579-177729766,	1	exon	188	GA-AG	CTCTTTTTTCCGTGTCACAGTAGGAACTGTTGTGGGAGCTTCAGCAGATTTAGTTACACCACACATCGTCTCCAAGGGAGATGATGCATGCTCTGCCTTTGATATCCTTGTTGTAGTGTCTTTTTCTTCCATTATGATTGCGTTGCCATGATCTTCACATGTAGACCTTTCTGTTGATAATTCTCTTC
circ_000560	chr6	162981572	162981705	-	Zm00001eb289740	162981572-162981705,	1	exon	134	GA-CA	TGGAGGCCGGCCTTCACGGAGCGAGAGACCGGCTTCTTCTTGGGGCCGCCCCCGCCGCGACGCCCCGCCGCGGCCTTCTTCACCACCTTTGCTCCGGCATCCATCTTCGATCAATCCCCCGTGCTCTCTCCCTC
circ_000561	chr6	35328028	35328238	-	Zm00001eb265410	35328028-35328238,	1	intron	211	GT-TG	CAGTTAAAAATGTCTAGTTCAATAACATCCATATGTGTACCAACTACCAAGTACCAACATATAAACATATCAGTCTAACAACAAACATTCAATCAGACAACTAAGCAACCAGTAGCATGGGCTGTTAAACAAGAGAGGTCATGGGATCAATTGCCGATTTCCAGATCAATCAAGTGTAGGAATTGGTAGAACAAAAGGGGGTCTAATAAAC
circ_000562	chr6	90524529	90535891	+	n/a	90524529-90524604,90524704-90524775,90524867-90524938,90525176-90525247,90525781-90525806,90535820-90535891,	6	intergenic	390	CT-AT	ATGTAATTTGAGGTCTTATATGAAAGCAAGAGTCCTCCTATTGATCCTGATAAGTTGTTTGATGTCAAATCCCTGTAAGACCACATTTTCTCAGAGATAACACTGAAAGGTTTGCCCACGCTCCTATGACATTTAAATAAGAATGGTTGCCCGCAAGATCACCAAGCATCAGGACTTCAAGATTGCTCAGATTAGAGAAATTTTTTGGAATAGGTCCTTGAAGATTCGTCCCATATATTCGCAAGTCTGTGAGATTGGTTAAGTTCTGAATAAATGCCGGAAAAGGCCCTACAATGTAATTATCAAACATCCACAGGGACCGTAGATTCCTTAAAAGCGACAGTTCATGAGGAAAACCTCCACTGAGAGGATTATTATTGAAGTGCCTAG
circ_000563	chr6	145343544	145344182	-	Zm00001eb284640	145343544-145343584,145343794-145344182,	2	exon	430	TT-GG	CCATTATCGTCATTTATTTGTCGAATAAAATCCAATAAAACCTGTGGAACACCGACCAAATACCTAACAAGAGTCTTATATACACCTGTTGCAGAACCAAGCTGTGCTAATTGCACCCTCCTACATATTAAATATCAAAGTAAAATAAAAATACCAAAACTCAATCAAGGATAACAGATGTATTTCATTCTTCTTATTGCAATGACACAGCTTTCCTGTGCATTCGAAGAAAAAACATGGTGTCATGGAAACGAAAATATACGCATAAGCAACCTTTCCATTTGCTGTTTCCATAACAATGCATATCGATCATGAATGCTTCCACCAGCACTAACCAGAGCATCTACCTCTGCTTGCTTATTTCTCTCTGAGCGTTCTCGCTGTTGCCTGATTAGAGTA…
circ_000564	chr6	164320723	164322155	+	Zm00001eb290190	164320723-164320809,164321065-164321298,164321383-164321433,164321513-164321586,164321682-164321944,164322087-164322155,	6	exon	778	AT-CC	GGGCTCAGATCCATAAGCTCTCTGATATAGTCCTTCCACATCTCATGCATTGGCTTATAGAGGTCGTACTTGTGGAATGTACCATCTAAATCAAATGAACCACATTTCTTATGTTGTTTTAGAGACATGTGCCTTTTTGATCGCTTTGAATGAATCAACAAAGATCTTGCTTGGGAATCCACTAATCTAGAACCCCTCTGAACATAATTATCCAAAAGGATCCCTTTTTCCAGTTTCAACTTTTTGGCACCCTTTGTAATTTTCCCAGCATCTCCACCTTTCTGAATTATGTCATATATAACATTGTGAACAACCTCTGTGCCATCCAAATCCGAGACAACACCTTTGGACAAAGTGTCATGAAAAGCACAAGAAAGTTCAGCATACACAGGATTGATT…
circ_000565	chr6	178067380	178068142	+	Zm00001eb297000	178067380-178067470,178067627-178067708,178067787-178067865,178068137-178068142,	4	intergenic-genetic	258	GT-AG	CTTGTTCTCTCAAAGTGATTGAATAAATCAGTTTCTGCAAGCCCAGACTCAAAATTATCGACCAGGGTTATATTCACTGCTTTAGCTTGATGACGATCATCAGCATGAGAGAAGTCATCATCATCAAGATTGACTTGAACATACTGTTCATCCAGATCTTCCAATCCCATTCGTCGGAACTTGGCACCATCAGGCTCTGAGAAAAACATGGGCTGTTCCACCACCATATTGATCTCTGGCAGTGTTACTGCTTCATAC
circ_000566	chr6	64059018	64059222	+	Zm00001eb268390	64059018-64059222,	1	exon	205	GC-TG	CATTGCAATTCAGACAATTAATGCGGCTCCTTTTAACTACTGGATCAATGGAGGAACGAATCGTTTCTTCCAGAGCCTCCAAGGGAGATCTGTCAGATGCACGTAGCACGTCACGCAAACTATTGCCATTCCCTAAGTAAATGTAATCAGCAGGGTGTTTTTTGGTGCTTCCAGCATGTTGTTCAAAGTAATAAGCTGAAATGGC
circ_000567	chr6	93478044	93480099	+	Zm00001eb272290	93478044-93478164,93480094-93480099,	2	exon	127	CT-AG	CTTGGCCTCTGGGCAACCTCAGAGTCGGTGGACAGGCCATGAGGGACAGCACCAAACTTCTCCTCTACCTTCGGTGGGTTAGCCAAGTCATGGCTGCTCTCCTCGGCATTCACTTGTAGCTTCTTAG
circ_000568	chr6	90556504	90564704	+	n/a	90556504-90556569,90564495-90564563,90564660-90564704,	3	intergenic	180	AT-AG	CTGTTGATTCTTCCACTTGCATCAATTGATGTTCCAAGATAATTTATGAACTGCTTCTGACCAGAAGGATTGTTAGAAAGGGATCCGTCAACATAATAGTTATACGAAACATCCAAGGAAACTGATGATTGAACAATTTCAGAAGGCACAGGTCCACTTAAGTTGTTTCCACCTACATAT
circ_000569	chr6	144532218	144532395	+	Zm00001eb284380	144532218-144532395,	1	exon	178	TG-AG	CTTCCCTCCCAGTCCAATAAGATGTTGCCTCCTTCACTGAACAAAATGTTAGCCAGTGATCCATTCTCAACATATTCGGAGACCAACAACCTATGAGATCCCTCTGAACAGAAGCCCCATATCCTCACAAGGTTCATGTGGTTGATCCTCCCAATTACACTTAGCTCAGCCTGAAACA
circ_000570	chr6	106584522	106585200	-	Zm00001eb275200	106584522-106584600,106585103-106585200,	2	exon	177	GA-AG	CTTAACATAGTCAGGCACCCAGTAAGTCTCCTTGTTACATTCCAGCAATTGGTCTTTAATCTTCTCAACCTTGACAAACCAGCTTGGAACAGCCCGATAAATAAGAGGAGTACCCGATCGCCAACAAAATGGATAAGAGTGTTCAATGCTCCCTTTACTAACAAGTCTTCCTTTATC
circ_000571	chr6	117202851	117203072	-	Zm00001eb278020	117202851-117203072,	1	intron	222	GC-AG	CTCCATCGCGAAGAAAAGGTCTAGAGCCTCCCGAGGATGTTCGTTGGAGGCGTACCCTCTGACTATCGCGCTCCAGGCCACCGCATCCTTGTTCTTCATCTCGTCAAACACTGCCCTAGCCTTCTCCATCTCCCCGCACTTGACGTACAGGTCCAACGCCGTGGTCGCCACGAACACGCTCTCCGTGACCCCCTCCTCCTGTTGTGCCGCCCTCCACACGGC
circ_000572	chr6	58506858	58507128	-	Zm00001eb268050	58506858-58507128,	1	exon	271	GT-GG	CCAAGACCAATGCCATCAGCTCTATACAATGATAATACTTCAAATTTGCGCTCTTACTATACCCATGTGATGCATAATTTGCAGGGTTCTGATTATTCCAACCCAGCTACCAGTGAAAGATTTCATGACATTGAGGTTCAGAGGATGCATAATTTGCAGGGTTCTGATTATTCTAACCCAGCTACCAGTGAAAGATTTCATGAAATTGAGGGCCAGATATCTATTCCTGTATCTACACCTTCTGATTATAGATATACATCCCAGTATGCAC
circ_000573	chr6	133529952	133530261	-	Zm00001eb281720	133529952-133530261,	1	exon	310	CC-AG	CTTGATGGGTGACACGGTGAGGATGTCATGTTCCAGGACCTTGAGGGAGACGGGCAACGCCGCGTCGTGCGGGAGGACGACGAGGTCGCCGTCGGCATGCCGGTACATGGCGCAGTCGCCGTCCCATTCGGTGTCCGTCGCGGCCTCGGAGATGAGGTGGACGTCGCCGCCCTTGACGCCGCAGGTCAGGGCCTCGGTGCCGGTCTGGTGGAAGGTGTTCTTCTTCTCCACGGAGTTCCACGCCGCGCCCTGGCAGTTGTACACGCCCAGCACGCCGGTGAACTTGTTCATGTTCCAGATCTTGAGCAGG
circ_000574	chr6	18341159	18341374	-	n/a	18341159-18341374,	1	intergenic	216	GC-AA	TTATATTTGTTGGGGCCTTGTGGTAAGAAATAGATGCCCTTACCTTCCTCAGGTACTCTAGAGCATCTTTGCTTGCTTTGCATAGTTCTGTGCATAGCTGAATTGCAGATATAAGGACCCATGGTGTTTCTCCTTTAACAATGATGCATCCAGGCCCATGAAGTTCTCTGCCAAATCTGGCACTTTCCTGGCAATCCTTATAGAGCACAAAGTAGC
circ_000575	chr6	73888541	73888822	+	Zm00001eb269610	73888541-73888680,73888756-73888822,	2	exon	207	GT-CT	AGATTGGTCGAGGATCGGTACAAGTGACTGTAGTACTTTCGCAACATTGAACTTGATGTTGGGAACCCTGTCCTTCGAAGAATTAATGACGACTGGAAGCAGCTTTTGACAGGTGATTTCTGCACCCATGACAGGAGCTAGCAAGGAGATTGCCTGCAGAATCGTCATGCGGTATAAATAGTGTGGGTTGTTGATCTTCTCCAGCAC
circ_000576	chr6	52604583	52604820	+	Zm00001eb267620	52604583-52604820,	1	exon	238	GT-AG	CTATTTACATCCGTCCCCTTGGATCATGCAATTTTCAAAAGCCACAATCACATGGGACTCTCAGCTAGTTTAACAGCTTATAACGAAACGAACTCTCAGCTGGGCAGCGAAAATGTACAGGTTGCAGGGTAGCAAAACAGGGTTAGGCAGGGTCAATGGGGATCATCAGGCAAAGCAGTGAGGGGGCTCTTTGTTCCCGCAAGCAAAACCTTCGATTCTCATTTTTGGGCTGCTCGAC
circ_000577	chr6	149785670	149793651	+	Zm00001eb285800	149785670-149785909,149793646-149793651,	2	exon	246	GT-AG	CTCTCCCTCCGATTTGGCTTCCTCAATGGAGGATGCAATAGCTTTGAATGCAGCTTGCCCATCTACAAACCATTGTACCATACTCCCATCTTCCAACAAACCCCTCGGTGGTGCAAATGAGCCAAAACGATGAGGATAGCACCAGCCTTCTGGAGGTTGTCGAGCAGCATTTATTGCAGTAACCCAGTCCTTAACCCTAGAAGAGCTTGTTGCGCGTAGCTTTATTGTCCGGCCACCAGAAGAAAC
circ_000578	chr6	169932362	169932497	-	Zm00001eb292760	169932362-169932497,	1	exon	136	GC-TT	AAAATTGGAGGAGATCGCGAAGGTGAAGAGCTTTGCAGTTCGGCGGAAGGACTGGCGGGTTAGCTTGGAAGGCACGAGAGAAAGTGAAAAGGGTCCATTGACAATCGGGGCTGAAGTATTTGAGCTCACACCAAGC
circ_000579	chr6	155653356	155654295	+	Zm00001eb287380	155653356-155653394,155654101-155654295,	2	exon	234	GG-AG	CTCCTCAACATCTCCACCAGCTCTTATGAAACTTGAAACTAAAATCCTAGCTTTGCGAACTTCTTCTTGCGGATAAGCTTTCAGGCGCATGCCTATCTCTCGGTACTCATTTGTTATTCTTTCCTCCTCGGCCTCCTCTTTCTGCCGATATGCATGCCACTCCTTAGTCCTCTCCCGCTGACGGGCCTGCCACTCCTCGTCGTAGAACTCGGGCGGCATCCCCTCGAGCTCACC
circ_000580	chr6	167708884	167708991	+	Zm00001eb291670	167708884-167708991,	1	exon	108	CG-GA	TCAGCGGCAAGGGCGTCACAACTATCATCGGAGGCGGAGACTCCGTCGCCGCCGTCGAGAAGGTGGGAGTTGCTGACGTTATGAGCCACATTTCCACGGGAGGTGGCG
circ_000581	chr6	90524529	90575143	+	Zm00001eb271640,Zm00001eb271650	90524529-90524604,90524704-90524775,90575138-90575143,	3	intergenic-genetic	154	CT-TA	TAGTTAAAGTCTGTGAGATTGGTTAAGTTCTGAATAAATGCCGGAAAAGGCCCTACAATGTAATTATCAAACATCCACAGGGACCGTAGATTCCTTAAAAGCGACAGTTCATGAGGAAAACCTCCACTGAGAGGATTATTATTGAAGTGCCTAG
circ_000582	chr6	175935269	175935470	-	Zm00001eb295800	175935269-175935333,175935408-175935470,	2	exon	128	GT-AG	CTCTCCTCTTCCTTTCGTCTCTCACGACCAAGTCTCTCTGTTTCCCTCTGCATTTGTTCTTCTCTCTTTCTATTCAGCAGATCTTGCTTCTCAAGCTCCTTTCTGATTCTCTTTTCATGAGCCTCAAC
circ_000583	chr6	58511250	58511458	-	Zm00001eb268050	58511250-58511458,	1	intron	209	GT-GT	ACTCACCAGCAGGGCATTTTCTCCATTGCCCCGCCGATAGATGGCCGCCTCGTGCGGGCTTGGCATGAAGCCCATCCTCTTGAGCATGGAATCCAGCTTGGCATTCCACGCCCTCGGTGCCTGTCGCAAGCCGTAGAGGGCCTTGCGCAGACACAACACCTTGCCCTCCTTGTCAGGATAGCAAAACCTGGCGGTTGGTGTACGTAGAC
circ_000584	chr6	120294352	120294474	+	Zm00001eb278770	120294352-120294474,	1	exon	123	GC-AG	CTTTCTTTGATTCCATCCCAGGCACACCAGTTCAGAAGTCCGTCTTCGATTACTCCGTCCCTAGTACACCGATGCAAAACTCAGTCTTTGATTATTCCATCCCAAGCACACCGATGCAAAAGC
circ_000585	chr6	173138014	173144294	+	Zm00001eb294230	173138014-173138019,173139610-173139692,173139932-173140053,173144130-173144294,	4	exon	376	TT-AG	CTTTTTTATTCTTCACATCAATGTATCCATCTTCGTTTATTCTCCTCATGAAATTCTTCCCAAGGCGTCCCTCCATACCTCGCTCTAATGCAAAGCGGCCAGAAATGTTCACAATGGCAGGGACATCATGGTACTTGGAAGCATAAAGAAGAACAGCATTTCCTCCTTTGCTATGCCCGATAAGAGCAATTATGTCATATTTCTGTTCTGAGAAATGTAATACTACAGAGCGCAAATCAGCTGCCTCTTTTCTGTAGCTTCCATACTGGAATTCACCATCACTTTCCCCATTTCCAGAAAAATCAAACCGAAAAGCACTAATTCCTTCCTTTGTGATGGCATCAGCAAGGTCAACCAAGATGCTGTCATCAAATAA
circ_000586	chr6	178896625	178896863	-	Zm00001eb297320	178896625-178896702,178896784-178896863,	2	exon	158	GT-TT	AAGGTACATGTCAAATGGATCATTGATCGAAGATTTCAATGACCATAATCCCTTTATGCCTTGGAGTTCTACTGAAGCCTGCTCATTAATCCCTATACCATTACGAACCACCCGAAGGGAACCATCTTTAAACGCCCCAGAACAAGTGACCACCTGAC
circ_000587	chr6	164321065	164322155	+	Zm00001eb290190	164321065-164321298,164321383-164321433,164321682-164321944,164322087-164322155,	4	exon	617	TA-CC	GGGCTCAGATCCATAAGCTCTCTGATATAGTCCTTCCACATCTCATGCATTGGCTTATAGAGGTCGTACTTGTGGAATGTACCATCTAAATCAAATGAACCACATTTCTTATGTTGTTTTAGAGACATGTGCCTTTTTGATCGCTTTGAATGAATCAACAAAGATCTTGCTTGGGAATCCACTAATCTAGAACCCCTCTGAACATAATTATCCAAAAGGATCCCTTTTTCCAGTTTCAACTTTTTGGCACCCTTTGTAATTTTCCCAGCATCTCCACCTTTCTGAATTATGTCATATATAACATTGTGAACAACCTCTGTGCCATCCAAATCCTGAGGACGTGGAAGGCTTTTGTTGACAATTAGAACTAGAAAATGCTACACCTTTATGAGAAGGTTG…
circ_000588	chr6	149113432	149113677	-	Zm00001eb285610	149113432-149113677,	1	exon	246	GT-AG	CTGGATGGGATTGGCGTCAGTGAGCAGGTGGATGATCTCCAGGGTGTGCTTCATGATGCGGACGGCCATGACCTTCTTGCCGTTGTTGCGCCCGTGCATCATGAGCGAGTTGGTGAGGCGCTCGACGATGGCGCACTGCGCCTTGCGGAACCGCTTCTTGGAGTAGCGCCCCGCGGAGTGCGGCAGGAATGTCGCGTGCTTCGCCGCAGTCACAGCCAGGTAGTCGTTCAGCGAGATATCGTTCAC
circ_000589	chr7	33201411	33207714	-	Zm00001eb305460	33201411-33201470,33202375-33202453,33203124-33203220,33207045-33207180,33207337-33207496,33207575-33207714,	6	exon	672	GA-TG	CATAGTTATTAAAGAATACAACCCAAAAGCACCCCAAAAGTGTGCTTGCTCCGATAGCCCCCATGTAAGCCTTGGCAGCAATAGACCAATCAATGAAGTAGGGACAAACATTAGGAACGCCAAATAAGGGTGAGCAAACCAATTCATTGCATTCTTTGTGAATAATAATCTTAATGCTGCAGCCAGAGCAGGAATAAATATTGCAAGGATTACACCAAACGTATGGAGTACCATTCCTCTCATGAAACCTAGGAGAGTTACAAACCATGACATCAAGGTAATGTTTGGGAACTTCAGGAACAGCGGTACAAGAAGAAAAATGGCTATCGGTAGACTGTGAAGAATCAGAGATATATCACGAGAATAAAATACCATGAACCAAGTCAAATAATCAAAAAA…
circ_000590	chr7	112629569	112629799	+	Zm00001eb312020	112629569-112629799,	1	exon	231	GG-GC	GCTTCTTCGTCCTCCGGTAGGCCAAGACCAAGTGCTCCACCGCAAGCTTCTTGAAGTTTGGGTCGAGGGCCACAACCCTGAACTTCAGCCCAAACCCTATGCCCCAGCAACGCCTCCTGTTATGGTCGAGGCAAATCCGCTCAAGATCTTGCAGGAAGCTGTTCGCCCAGTACCCGACGTCGTGCGTGCTCACGTATCTGTGGTGTTTCTCATGTCTCAACACCTTCTCCC
circ_000591	chr7	76226930	76227882	-	Zm00001eb308480	76226930-76226991,76227622-76227882,	2	exon	323	AA-TG	CATATCTCCGGCCTTGTGTGCAACCTTGGCAAAGACACCATATCCATGAATTTTTGATTTTCCAAAAGTTAGTCTCTTCCTAAATGTAGCCTTCACGATTGTATATTTTTCAACCATAGAAGACACATTGCCAATAGCTTCTTGCTGCACAGCATCTGACAAACCAAACGGTTGAATTGATTCTCCGCATGTATTGCCTACTCTGTTTTGGCAGTAGCCACTGACAATATGAGGTCTATTCTCCACATATAAACGTTTCAGAGAAGCAGTAGCGACAACTTGTGGCTGCTTTTGGCCCCTTCTCCTGTGTAAATTATAGGGTT
circ_000592	chr7	151874864	151875146	+	Zm00001eb320470	151874864-151875146,	1	exon	283	CT-AT	ATCGACACGAATGGCGCTGTCCCGGATAAAGCGGAGAAGGTTGACAACAGCATGCAGAAGGAGAGCAGGCCTGCTGATAGCGATGCCAACGTGAGCTCCCCAAGGAGTAAGGTGGCCGACGAGGACGTGGAGGAGGTGGACAAGGCCTGGGACCGGCCCAGCAAGAGAAAGAGCACAGAATTCGATATAGCCAAGAGCATCGAGCTGCTGGCTAGCTCGTTCTTGAAGATTGAGCACGCCAGGATGGAGATGTACAGGGAGACAGAAAGGATGAGGGTTGAAG
circ_000593	chr7	110802942	110803007	+	Zm00001eb311840	110802942-110803007,	1	exon	66	AA-AT	ATCAGTTTGTCAACCAAGCAAGGGACGTGCAAAGATCAAGTATAGGTGTGGCTGGAACTACAGGTT
circ_000594	chr7	95150997	95151767	+	Zm00001eb310060	95150997-95151247,95151439-95151598,95151678-95151767,	3	exon	501	TG-TG	CAGAACACAAATGGAGATAAGTCAATGCAATAGCAACATCAAGGGCAATCACTATACGTTGATTAAAATTCAGGATTCTCTTACGTTGGTCATGTAGGTGTTCCCTAAGAGTGCCATTTGGAACATACTCTGTGATCCGAATACACTCATCTTTTTCATCAATAAAACCTAAGAATCTCACCAAACTCCAGTGATTAATTTTTGTAAGGAGCTTCACTTCCATAAGATGTTTTGCCTCTTGAACGTGGCCCTTTTTAGCTCTCCGGATGATAACAACCTGGTTATCTGATAATACAGCCCTGTAAACTGCCCAGGTTCCCCCTTCACCTAACTCAAATAAAGGTGAGAAATTATGAGTAACCTTCTGAACCTGCTTAAGGCTTAAGTTTAAAGATCCAT…
circ_000595	chr7	116780646	116780774	-	Zm00001eb312590	116780646-116780774,	1	exon	129	GT-AG	CTTTTTCAGCTCGAGCTTCAGCTGCTCTATCAGGTCTTGGTGCTCCCACAGCGACTCCAGCTCGTCCTCCTCCTCGGCTGAAAGATCCTTCCACCTCACTTCTGGATCCTCCCCATCTTCGTCGTACAC
circ_000596	chr7	165571973	165572090	+	Zm00001eb323810	165571973-165572090,	1	exon	118	GT-AG	CTAATGTTTCCCAGCATGCGCCTTCGAGCACGGATTCTCTTTTCCTCTCTTTCTTCTTTGGTCTGTTTGATCTCACCTTCCTCTTCTGTTTTATCAGCTTCAGCTTCTTCCCTTTCAC
circ_000597	chr7	180912781	180915156	-	Zm00001eb330040	180912781-180912888,180915151-180915156,	2	exon	114	GA-AG	CTCCATATATGATGCACGACATCTCTCATGAGCACGTTCTAAAAATGTGCGTACATACTCCACAAGCTCAGTCGCATAGTTTGGCATCAATTGAACCCATCCAAGAACTCACTC
circ_000598	chr7	180085674	180086625	-	Zm00001eb329710	180085674-180085770,180085954-180086059,180086161-180086219,180086496-180086625,	4	exon	392	TG-AG	CTCCAGGTCTGGATTGGATAAATCCAAAGTTTTCTAGCCTCTTTGCAGTATCTTCAGAGAACGCCTTCACCCAGAATGATAAGGTCTCCCTACCCAGCTCATCAAGTGTGAGACCTCCAATTTTCGATACACTTCCACAGAAGGCAAGATCAACAACTTCTTGACCAAGACCATAAATTTCAAAGATCTGAGCTCCACAATAGCTTGAGAGCAGTGAGATACCCATTTTTGAAAGAATTTTGAGCAGACCTGATTTTACTGCTTTGATAAAGTTCCTTTGTGCCTGCTCGATGGTCACTGTGGGCATCTTCCCATTCCGCATCAAATTAAGAGTTTTGTTGCTCAGCCTCCATTGCCGGCATGTTTCTAGTGCCAGATAAGGACACACAGCA
circ_000599	chr7	135314933	135315626	-	Zm00001eb315880	135314933-135314938,135315302-135315427,135315553-135315626,	3	exon	206	GT-GG	CCTCTCGTGATAGTGATTGTCCCCGCCTCTAGGTCGGGTTTAATCCTTATCTCCAACTCACCGCCATCAGCCAACACAGAAGGATCAGTTACGCTGAGGAATCTCAGCTTATCCAGTGCATCACTCGCGTTACTTACAAGCTCACGTAAAAATACTTCCTTGTGGCTGTATAAACTGTGTACAATTAAGTCCATCAAGCGGGTAAC
circ_000600	chr7	13964481	13964558	-	Zm00001eb302300	13964481-13964558,	1	exon	78	GC-CG	CGCCACGTCCGCCACACCAGCACCAGCGACACCAGCGCGCCCGCCGCCGTGGCCGCCGTGATGATGAGGAACGACCGC
circ_000601	chr7	174897080	174897749	+	Zm00001eb327550	174897080-174897118,174897220-174897510,174897744-174897749,	3	exon	336	GT-AG	CTCAATGTTTTAAAACATTACTGTTAATGTCGGACCAAGTGAGGTTGAATGTGAAGATTCCTGGTTGAGGCTGAATATCTGGAACGACAGAAACCAGAGAGTTGTAAGTTGTTCTCTGAACATTCGTAGTGTCAAGCAGGTTAGTGGAACTCATGCACATAAGAACTCCATCATTTGTCACTTGAATAGGACAGTCAATGATGTCTGCACCATCATCAATTGCACTATGGTAGGCCAAGTCTGTACAGTCCGGGTAGTCTCCACTAGCACCATTATGTGAGATAACTAAGGGTTCTCCATGATCAGTCTTATTTGAATTCAGTTTAGTAAAACAAC
circ_000602	chr7	20173603	20173752	+	Zm00001eb303290	20173603-20173752,	1	exon	150	GT-AG	CTTGAGAAGAAGAGGAAGCAGTTCGATAGTTGGGCGCAGAAAAATTGGGACAGAGGAGCAAGTATTCCTGATGGCGACAATCCCGGGCGTGTTGATCCTGCAGCTGAGCGGAAAGCCGTCGTGGATAGGGTGGAGAATGCACTGAAGGAC
circ_000603	chr7	29985185	29985619	-	n/a	29985185-29985293,29985377-29985619,	2	intergenic	352	GT-AG	CTGATGTCCGGTAGGTGGAGGTGGAGGTAGAGGTGAAGGCCAAGGAAAATGTACGAGAGGTGGAGGTGGGGGCCATCCGGGGTTCTATCCTTTAAGCTTGTGCTAGTTGTTGTAGGAGTGCTTGATGTTGTTGAAATGAGCAGCATAGTATTCCTGTTGTGCAGCATGTTGCCTCAAGTATTCCTCCTAGAACCTTTGTCGCTCCTGATGTTGCCTAAGCTCTTCTCGCAGTCGCTCCACTTCTATTGTGTCCTGGGTGGAGCGATAGGAGCAACGAGCAGTAGACCTCAACGAACCTGTCCTATGTACTCTCACCTGACTCGAGTCGACGACGTTATCGAACATCGAGTAC
circ_000604	chr7	155006225	155006612	+	Zm00001eb321400	155006225-155006271,155006347-155006612,	2	exon	313	CG-AG	CTAAATAGTGAATGCATAGGGTGTCCTGACCATCATATCTTGGAGTTTGGGTCCGAGAGAGTTGAACACAATGATATAGAGTAAGTGGCTGCAAAATTAAACCTCAGGCAATTATAGAGTTCAAAGTTATGTCCATAACATGTTGGCATGTTGCAATGTACATACCCAATGAAGTAAAACAGCAACAGGTGAATGCAGGGGAAGGGATCTCCACTGATAATATGCTTCCCAGCTTGCCAGGGCCGAAGACACAGGATTTTTAGGCTCTGCACAAGGGCAGAGGGAGCTTTGCAAGTTCCATTCAGCTTCTACG
circ_000605	chr7	172612182	172612368	-	Zm00001eb326740	172612182-172612368,	1	exon-intron	187	GT-GG	CCCCGAAGCGCTGCAGAGCGTCAAGGCTGCCCTCGCCACCAGCGACGTCCTCGACCCCGTCGCCGCCGCCAACGCCAGGCTCTCCGATCCCTCTACCAGCAAGAAGCCCATCCCCCGTCGCGCTGCCGGACAATCCTGGGAGGATCCTACCCTCACTGAATGGCCCGAAAGTAGCAGCCAACATAAC
circ_000606	chr7	177794160	177794322	+	Zm00001eb328760	177794160-177794322,	1	exon	163	CA-AG	CTCACCCTCCCCGCGGCCGTCGTCCGTGAGGTCGGCCGGGTCGAACTCCACGCGCGCGATCCGGACCGTCGCCTTCGGGGTCTCGAAGATGGGGCCCTTGGACGTGAACACCACCCCCCGCTCCGTGGGGCTCCAGGTGGTGTAGAACAGGTCGGGCTCCTTG
circ_000607	chr7	149377843	149385071	+	Zm00001eb319630	149377843-149378055,149378318-149378373,149385066-149385071,	3	exon	275	GA-AG	CTCTGTCTTAATTACAATGTCATCAGACTGAGCCCCAGAGCGCCATGAAGGTGAATCAATTCCACCACGATGTAGTTGTTTGGAAGAAATGAAGTCCAAACATTCATTTAGCTTCCCAGTCTCAAACTTTACGAAGTGGAGCCTCCCTCCAAGAATCGGGTAGCTTCTCCTGCCACCATTAAACATCCCAAGTCTTCTCTTTGTGGATATCTTGTGCTTATCTTCAGTGGAGAGCTCAGCATGTCGCGAGAAGTACACCAGTTTTATAAGAGATC
circ_000608	chr7	129643976	129644110	-	Zm00001eb314600	129643976-129644110,	1	exon	135	GT-AG	CTGAACACGCGCCAAGAGGACGGGTTAACGAAGCACCACGAGGGAATCTCGGAACACGAAGCTAGCAGTGGCATTTAGCAAGCACGCGGGATAAATATGGCAAAAAAAAACGAGTTTCTAAAGCAAGACGAGTAC
circ_000609	chr7	165572015	165572227	+	Zm00001eb323810	165572015-165572227,	1	exon	213	GT-TG	CAATTGTACTCATCAATTTGCATAGTGCTTCAATGTTCTCCTCATCGGGATCATCACAATTTCCAAACAATTTTTTAATGCACTCATGCATAATCCTTTCTGTCAACATTTTCTTTTTGAACAACTCTCCGATTAACCTAATGTTTCCCAGCATGCGCCTTCGAGCACGGATTCTCTTTTCCTCTCTTTCTTCTTTGGTCTGTTTGATCTCAC
circ_000610	chr7	161186242	161187598	-	Zm00001eb322400	161186242-161186247,161186836-161186888,161187338-161187598,	3	exon	320	GT-TG	CATATGCTGAACAGATTTAACAGAGAAGTAGCATAAATCAGCAAACATTGCCTCAGATCCTGTTGCACATAAAAGACAGCCCCCCAGGGACATCCAAGCTTCAGTGGGATTTCTTTCAAAATAATAGTAGATATAAACAGGATTGAATGCCTGGAGTACTTCTGGACCATATACTCTGAGGTTATACATTCCTATCCCAGCAAGGCAGCAAAACCATACGAATAAAGCTGGCCCAACAGCAAGCCCTACTTTGCTTGTTCCAAACCGTTGCAGACTGAACAGAACAATAAGAAATGCAACAGTTATCATGACCACTTCAC
circ_000611	chr7	3911162	3911260	-	Zm00001eb299450	3911162-3911260,	1	exon	99	TT-AT	ATTGGCTGCCTCACTCCTGCTTGCTCCTGCAACTATAGTGATCGTCTATGCTACATCATATTTACTCCTGTTGCTTGAGGCCATTCCGCGAAGCCACAA
circ_000612	chr7	140888897	140889181	+	Zm00001eb317230	140888897-140889181,	1	intron	285	GT-AG	CTGGAAGATATCAGAGGAGAATCAGGAAGAGTAGAGATTAAGATTAGATCACTTCAAGTTTGATAGAATAAATAGAATCAGTTTTGATTGGGGTTTTTAGTTTGGATAAGTCTTAGCAGCTAGATCTCGTTTGGATAAGTCTTAGCAGTTTTATCTTCTATTATTGGGGATAAGTCTTAGCAGTTTTATCTCCTATTATTGGGGGAAGAGTCAGTTGGCCTTAGGCCTATATATTTAGGATTTAGTAATTAAGGCAGACAATGAAATCAATCTATTATTTCCTAC
circ_000613	chr7	177506474	177520256	+	Zm00001eb328690	177506474-177506614,177520046-177520105,177520199-177520256,	3	exon	259	CA-AG	CTTCATCCATATCTTTTCTGGTAAGCCTCCCCTTGAAGCCTTGGCAATCTCCACACTCCTGATAAGCTTCGATAATAGGTCATCAAGATCGTCTCCTCTTATGAAATCTGAGGCGACTCTGCAATGGTACCAAAGGAGCTTGACGTTGGCCTGAGACAGTTGGTGCTTCACTAGACATTTGAGCAGGATGAGCAGTGACAGAATGCGGCATTCGCTCAAGAACCCTTGTGACATCATTGACGCCGATAGCAAATTGTTG
circ_000614	chr7	149672215	149673133	-	Zm00001eb319770	149672215-149672220,149672720-149672804,149673010-149673133,	3	exon	215	AT-AG	CTCCATCTCGTCATTTTCACCAATAATATGTCTACGCTCTGAGTGTCCAAGAATAACCCATTGACAACCGATGTCCACCAGTTGTTCTGCACTGATCTCTCCGGTGTAGGCTCCTCCTTTTCCAATCCACACATTCTGAGCAGAAACCTCAATGCGACCCGTTAGTGAATTCTTGACCTGATCGATATAGATGAATGGAGGAGCCACCACAACAT
circ_000615	chr7	183200466	183200828	-	Zm00001eb331170	183200466-183200641,183200779-183200828,	2	exon	226	GT-GG	CCTATGATTCTTGTCGTTGTCGTCTAAAACAATTGAGGTGTCAGTCCTTGAGCTAGCATCTGCCATCACTAGGCCTCACGAGCAACGATCGCCAGGAGACAGCAAATCACTTTGCTCTCTCCTTTCCAGTGGCAACGGGTGTCTTAGTGTTTCACAGGATCGACCGTTGGTGGAAGTTGTTTCCAAGACAGTAGTACCATGTCAGGATTCATTGCAATCATATGAC
circ_000616	chr7	7442971	7445610	-	Zm00001eb300680	7442971-7442976,7445112-7445213,7445298-7445475,7445555-7445610,	4	exon	342	GT-AG	CTTTGACTCATCTTTTGTGGCATGATGGTATGTAACTTTTAATGTCTTCAGCGCTTGTAATTCTGGAAGTGGTATGTCCAATACTTCATAGTACAGAATATCAGAAGTCTGGTTATAATGAATCAGCATGTCCAGTAGACGTTCAACGCCTCTGTACTTTATTGGCTGAGGCTTAGGCTGCTGCGAATAACAATTATGTGATGTAAGCCGAATTTTCGATGGGTCATCCACGCCAAGTTTTTCAGCTACTTTTTCCACGACTTGATCATATGTGAAAATCTTTGACATCTCGAGGAAAAAATCGTCCTCCTTGGGCTTCTCCAGTGAACGAAAGTGGACCAC
circ_000617	chr7	148324970	148325154	-	Zm00001eb319330	148324970-148325154,	1	intron	185	GT-TG	CATCCGCGCGTGCGCAAAATCAGTTAGGGTTCCGGGTTTCTTGCGGGATTTGTTAGCTAAACCTGCGGGATTAACTCGAAAACCGACTTGTAACGGCTCAAAACCTCCCCCTTTTATATAGATGAAGGGCTACGTCCGATTAAACCCCCACAATCGATCCAATCAACTCTACTTATCGTTTTTAC
circ_000618	chr7	18999839	19000028	+	Zm00001eb303080	18999839-19000028,	1	exon	190	TA-AG	CTTGGTTTCTCATCATAATTCAAAATAACATTTAAAATATGTAGCTAGTACAGAAAACTCTTTTCGCGACACTTGGAACAGTAAACTAAGACGTTCAAGCTTCCACTGTCTCGGTGGGAGCCTCGATCAGAAGACCCTTTGTCGGCTTAGCCAAGAGGTCGGTGAACTCCTGGAACGGGGTCTTGGCATA
circ_000619	chr7	106652373	106654437	-	Zm00001eb311450	106652373-106652473,106652581-106652631,106654432-106654437,	3	exon	158	GA-AA	TTTAGGCTTTACTGAGACTCTGAAGTCTGTATTTCTCATGGAGACCTGAATGCCTCCCCTGCATAGCGCACGTTACCAAGCTCCTCTTCAATCCGCAGAAGCTGATTGTATTTGGCCAGCCTCTCGCTGCGGCATGGAGCCCCGGTTTTAATTGGTTC
circ_000620	chr7	139203322	139204876	-	Zm00001eb316930	139203322-139203484,139204691-139204876,	2	exon	349	TC-AG	CTTTAATAATGTACATGAGGAATTCATGGCTGACATTGAGCATAGGCCGCAAGAGCGGTCCTAAAGCCATAGTAGGGCAAACTGTAACAACATTTAATCCATTTCTCTCTCCGTATTCTAGGGCTGTCTTTTCAGCAATAACCTTGGCAACCATATACCAGTCCTCGTTCTTTTTGCAAAAGTTTATGTCCGACCAGCAATCCTCGTCTTTAGGTCTATGTGGAGGCCAATTTGGGTCGAAATGAACAGCGGCGGTAGACGAAACCACAACAACCTTCTGAATATTATTAGCTGAGCAAGCCTGAAGAATGTTTAAGGTACCTTGCACAGCAGGAGCCAGTACTTCTGA
circ_000621	chr7	185582507	185582667	+	Zm00001eb332130	185582507-185582667,	1	exon	161	AT-AC	GTATCTAGTAATGGTGGTGTCATGGCAACGAAGCAGCACAATGCGTCATTGTCAGGAACGAGTATAAGAGGCCGGGAGTTCGAAGACCCTGAGACAAAGGCATACATGAAAGCCAATGCAGCTAAGGCGTTATGGCAGCTTGCCAAGGGAAATGCAGCTAT
circ_000622	chr7	128022677	128022995	+	Zm00001eb314330	128022677-128022995,	1	exon	319	GT-GG	CCTCGTCGGGCACGTCGCGCCGGGCGCCGGCTTCCTCCTCATCGGCCTGTGGCAGCTGTTCAGCCACACCCGCCTGTTCCTGCTGCGGCCGAGCTCGTACTCTGCCCCGGTCTGGTTCCCGGTGCCGGGCGTGCGGCACCTGGAGCTCATACTCATAATCATCGGCACGGTGCTGTCCATCCTGATGGAGCTTGTCATCGGCCCCGCGAAGCACCAGCCGTTCGACGACGACGGCACCATCCCGTCCGACCACCTCCACAACTTCGAGCACGCGTCCATCTCGCTGGCGCTGCTCGTCTTCGCGGCGGTGACCATCCAC
circ_000623	chr7	8230182	8230483	-	Zm00001eb300890	8230182-8230270,8230394-8230483,	2	exon	179	GC-AG	CTGGATAGAAGTTAAAATTGCAGCAACATCATATATAGGACTCCACTGGTTCTGTAGGATATCCAAACAGATGCTTCCATCAGCATATATATTTGGATGAAACATCCTAGAGACAAATCGAACAGTTGGTGGCTTGTTTGGGTAATCTTCTGTAAACTGCAAGGTAAGCTTGAACGTGC
circ_000624	chr7	18732292	18732466	-	Zm00001eb303030	18732292-18732466,	1	exon	175	GT-CA	TGAGGAGTGCTGTTCCCGAACTATGCTCGCAGACTTGTACCGTCGATCTATTTATTTTTGTCAAGAGTGAGAGTGGTGAGGAATAATATGCCCGCTTGTATCCATAATTCCTGTTCGTAACTACGGAATAAGCCGCCGCAGCTTTAGCGGCAAACGTGACTAGTACTGTCAGAAC
circ_000625	chr7	99327417	99328260	+	Zm00001eb310530	99327417-99327502,99327783-99327828,99327903-99328107,99328191-99328260,	4	exon	407	AT-TG	CAGGCAAAATCCTTTGTAGACTTGGCCTCAAACTCCAGGTCTTCAAGTTCAGGAATCATATCTTTAGTTTCTAATGGAAAAACAGGAGAAACCTCATCCTCATTATTTGAAACACCTGTATCAAGAGGGAAAAGTTTCTCTTCGGAAGCTGCAGATCTTTTTTCAGAAACTGATACATTTATTTCTGAGGCTGAAGTCTTTTCTTGGGAAGCAGTGGGCACACAAGTAGGTTTAGTGGCTGATGCTGGAAACTTATTAAGAAACCATCCTTGAACCTGTGTAGCTTGTAACGCTTTACTTCCAGCACGGCCAACAGAACGATTAAATTCTTCTGCAAGCTTCTGGCAGAACTTGTTATCAAAGACTTGGTCTTTTCTATCTGCAGCCAATTTCTCCATC…
circ_000626	chr7	99327417	99328260	+	Zm00001eb310530	99327417-99327502,99327783-99327828,99327903-99328085,99328191-99328260,	4	exon	385	AT-TG	CAGGCAAAATCCTTTGTAGACTTGGCCTCAAACTCCAGGTCTTCAAGTTCAGGAATCATATCTTTAGTTTCTCATCCTCATTATTTGAAACACCTGTATCAAGAGGGAAAAGTTTCTCTTCGGAAGCTGCAGATCTTTTTTCAGAAACTGATACATTTATTTCTGAGGCTGAAGTCTTTTCTTGGGAAGCAGTGGGCACACAAGTAGGTTTAGTGGCTGATGCTGGAAACTTATTAAGAAACCATCCTTGAACCTGTGTAGCTTGTAACGCTTTACTTCCAGCACGGCCAACAGAACGATTAAATTCTTCTGCAAGCTTCTGGCAGAACTTGTTATCAAAGACTTGGTCTTTTCTATCTGCAGCCAATTTCTCCATCCTTGCAAT
circ_000627	chr7	48562489	48564014	-	Zm00001eb307010	48562489-48562603,48563749-48563817,48563901-48564014,	3	exon	298	GT-AA	TTTGATGTATGACATAAACTTTGAAACATCGATTCTTTGTGCAACCTTCATGGGCATTCCACTGTTAGTAGCTTTCAGCTGCATAACTCCTTGCATCTGATTACTAGGGTTATCCCTGAACAAATTCTCTGTATCACCGCAACTTAGCCATCTCTTCCTCCAACTCTTCAAGGTTTCAACCATGTTGGAATGGTAATTAAGCAAGTTAACATGATATGCCTTCTCATCCTTTTTTATGTGCTTCTCCTTGTTAAGTAGTGCATCCGGATGAATATCACCATAGCAAAGAGAAGATGAC
circ_000628	chr7	184506581	184507124	-	n/a	184506581-184506944,184507038-184507124,	2	intergenic	451	GT-TG	CATCGTTATTAGTCGTTCAGGAGAACGAATAATGATCTTCCGTCGCTATCAGCCCACGCGCCGTTTTCTTCTGCCGTCCAGAGCCGTTCTTCTCTCTTCAAGGTTCTTCTCTCTCCCGTCAAGCCTCTTCCTTCCATCTCATTTTCTTCAATCTCCATTTCCCTCCCCTGCTAGTCTCCTCCCCTGCTGCCCGGAGATCTGCTGCCCGTGGTCCCGCGCCAAAGCAGGTGGCGGCGGCGCTGCACCTCCTTCTCTCCAAACTCCGCGTCTTCTCCCTTGCTGCTCGCGGCCCCGCGCCAAAGCAGGTGGCGGCGGCGCTGCGACCACAACCCTAGTCCGCGCCAAAGCAGGTGGCTTGTCGTTGTTGTAGCTGGAAATGAAGATGAAGCACCAAGCCGT…
circ_000629	chr7	174322723	174323016	-	Zm00001eb327310	174322723-174323016,	1	exon	294	GT-TC	GACGAGGCGGAACCGGCGCGAGAGAGGGCCCACCTGGCGCCTCCACTGCCACGTTGCCGGGGGCCCGAAGCCGTGCAGGAGCACCAGGACGGGACGGGCGTCGTCCTCGCCGTCGGCGGACCCCGGCGGGAAGCGCCAGCAGTGGACCGTGGTGGCGCCGCCGTCCAGCGGGACGGAGGCCTCCACGAGGCCCGCTGCGGCGAAGCGGCGCCGGAAGTAGGCGTCCAGCAGCGGCGAGATGCCGAGCGTTGGCATGGCGGGGGTGAAGGACGGCGGGTAGCGGCGTCCCTGGAC
circ_000630	chr7	19152447	19152536	-	Zm00001eb303120	19152447-19152536,	1	exon	90	GA-TC	GACGCCACAGCGAGCGCAGCAAGGCCAGGAGCGCATCTTGGTCTGTTCATGCTGCTGCCGGCGGGCCCTTAGCTTGTCCCAATAATAATC
circ_000631	chr7	7450406	7450486	-	Zm00001eb300680	7450406-7450486,	1	exon	81	AT-AG	CTTGATTATGGTATAGAGGTGTGCCTCAGCTTTTTCCTTCTTCCGACGTTCCTTCTCTTCACGGTCCTTTTCCAATCTAAT
circ_000632	chr7	180768580	180768903	+	Zm00001eb329960	180768580-180768620,180768787-180768903,	2	exon	158	TC-AG	CTTGAGGCTACAGCCGCAGAGACGGTCTCGTACCAGCGGGCGGCATTAGGAAACTCAGCGCCAGGCTTCGACGGCACCGCGGCGAAGACCTTAATGTCATCCTTAGTAATGGAGTCACCAGACACATAGGTTTTGCCGGCGAGGTGAGCCTCGAGGGA
circ_000633	chr7	87395284	87396138	-	Zm00001eb309350	87395284-87395376,87395457-87395614,87395970-87396138,	3	exon	420	GT-TG	CACTGCGACATGTGACTTTGCCCTTGTAATAGCTACATTCATGCGTCTTCTATCGGCAAGGAATCCGACTTCTCCCATGGAGTTTGATCGAACCATGGATATGACGACTGCATCTGCTTCCCGACCCTGGAAGCTATCTATTGTTGAAACCTCAACATCAAAAGCCATCGGATATTCTTGTAGTCTATCTTGTAACAGTTGCACTTGCGCGATGTAAGGGGACTGAACAACAATTGAAGTTGGAGGGACTCCACATTGTACAAGATTGAGGACATGATGTGCAACTATATCTGCCTCACCATTGTTGTAAAATGAACCAGTACCGGCTGGGTCTAAACTCTCCTCACAATCAATATTTAGGCTTCCATACGCCCTCCGGGTATCAAGTAAAAGTAACGC…
circ_000634	chr7	33207045	33207714	-	Zm00001eb305460	33207045-33207180,33207337-33207496,33207575-33207714,	3	exon	436	GA-AG	CTCTCATGAAACCTAGGAGAGTTACAAACCATGACATCAAGGTAATGTTTGGGAACTTCAGGAACAGCGGTACAAGAAGAAAAATGGCTATCGGTAGACTGTGAAGAATCAGAGATATATCACGAGAATAAAATACCATGAACCAAGTCAAATAATCAAAAAAGACCGCCCCCACATCTTCAATTCCATCCTTAGCAGCTTTATTAGATATCTCGTTCTCTTTTAACAACATAGGATTTGTGAATGCCTTCACAAGGTTGAATAAATTTTCACCACGTGCTTGAATACTTCCAGGAAGTAGATTCTCCAATGTATCATATGAAGTATGATAGAAATAACCACCGAGAACAAAAATTATATCAAGTCCTGGAATGTTTGTAATGTCTTCAGCAAATATTC…
circ_000635	chr7	171990145	171990294	+	Zm00001eb326610	171990145-171990294,	1	exon	150	GT-AG	CTTTATTATCATTGAAACAACCATATGGCTGCAACTTTACACGAGAAGTAACATCTGCACTGTCTGCTTCATCGCCTCCACAACAATCCTTGTTACCAGGTGCACAAATTGCATCAAGAAACCAGGTTTCACTACCTTCTTTGCCTCCAC
circ_000636	chr8	155671748	155672139	-	Zm00001eb360580	155671748-155671807,155671905-155672139,	2	exon	295	GA-CG	CGCCATATCTCCCAAGGATTTGCAGCAGATAGGGCAAGTGTAGTGACTACAAGTGTATGCCTGAAAGCAAGCTGAATGCATGAAGTGGCCACAAGGGAGGGCTCTGACTGCGGCACTTGATGTAAATAGGAAGTCACAGCATATTGGACAATTTGTCTCTAGCCCTTTTTCCCGACATTTGTGCTCAGTTAATTTCATTCCAAGGCAGCAGTTGCATTTCATGCAATGGAAGAAATCAACACCAAGACCTTTCCCAAGACGACACAAATTACAAAACGGACAGTGGTACACAGTC
circ_000637	chr8	123212852	123215207	-	n/a	123212852-123212957,123213987-123214091,123215202-123215207,	3	intergenic	217	AT-AG	CTTAGCTCCAAATGTATCCAATTTCCAATGTAAAATGGCAGTATGAGCAAAGAGTATTTGAGTGCCTCCTCACTCCTAACATCCAAGCATTAATTCTCTCAAATAACTCCACCCTTCAACGGATCTCTCCATAACCAGAGGACCTTTCCTTCCGCATCTAGGAGGACAAAACCAGCAAGGACCTTTCATTTTGTATCTAGCCAGACAAACTAGGGAT
circ_000638	chr8	156557318	156557459	-	Zm00001eb360800	156557318-156557459,	1	exon	142	AT-TG	CAACTCCACCAGTGCTCACATAACCTTCTCCAAAAATGCGCTCGTAACGTAATATTCCACTGGCTTTGTACTGCACATTGTCCAAAAATCTTTGAAATCCTTTATCTTCTGTAGAATGGACCTTTTGCCATAGCCAACATAT
circ_000639	chr8	168770764	168772653	+	Zm00001eb364810	168770764-168770769,168772600-168772653,	2	exon	60	AA-GG	CCAACCAGGAGGCAACTCTTGTGCAGATTTGTTCTCGATTTCTTGAGAATCCACGAACTT
circ_000640	chr8	151471687	151472470	+	Zm00001eb359410	151471687-151471773,151472446-151472470,	2	exon	112	GT-AG	CTCTCCTTTCTTTGTTAATGACAGCCTGATAGATCTTTCCTGTGGTTATATTATTGTCACGGGTCAATTTGATATCCAGAAAACGCTCATAATTTCCAAGGTCCAAATCCAC
circ_000641	chr8	180937156	180937404	+	Zm00001eb371010	180937156-180937404,	1	exon	249	GT-AG	CTTGGCTCATTACCAAAAATATTCCTACCTCATTGGGACTCCTATATTACTATTGGACCTCCAAAATGGCAAGGTCCTGAAGAACAGGACAGCCGATGGTTTGAGCCAATCAAATGGAAGAACTTTGCTCATGTTAGCACAGCACCCATAGAGTACACTGAAACAAATATTACGGACCTATCTGGTGTTTATATTGTTACAGGAGCACAGTTGGGAGTGTGGGATTTTGGTGCAAAGAGTGTTCTCCAC
circ_000642	chr8	154087111	154117633	-	Zm00001eb360130	154087111-154087206,154096329-154096418,154096556-154096639,154117094-154117353,154117445-154117633,	5	exon	719	GT-AG	CTTGAAGCAGCTCCAGATTCTGTGTATTCTTGAAATGATTGCTTCTCACTACCAAGTATAGATCTTCCCCTTGCTCTCATTAATGGATGCTCAGGGCTGGAACTAGCACCACGGGGTTCCTCGGCAACTCTCCTTTGGCTGCGCCTCCAAAAGGCATTTGCTATATTTGGTTCACTACATGACGTGCTTAATTTCCCCTCAGAGAATGTCCTTGATCTCAACATCATATTACGCAGTGATCGTCCAGATAGATATGATGAAGATTCAATTCCTTCAACTTCAACTTTATCAGACAATCCATAAAGTGGGCTGTTGGGCTCAAGAGGAGAATCACAAGAGTCATTTTCAGCTGAGTCGCTTTCACCCGCAGCAGATATGTGCGATATAAATATAGCCTTA…
circ_000643	chr8	73092694	73093181	+	n/a	73092694-73092842,73093137-73093181,	2	intergenic	194	GA-AG	CTCCACATGAAGTAACTAATTAAGCCAAAGACATTATAATCTTTCCTGTTAACTACGCTGCAGGTCGAAGATCTAGTCTTCATAATCAAGAAGTAACGGCGATCCGAATCGATTAATACCCAGCTGGGGATCTCCAACCACAAGACATATGCTTCCCTTAACTCTTTTGCACATGTCTACCATTCCCACGGATC
circ_000644	chr8	158804463	158805018	-	Zm00001eb361410	158804463-158804630,158804749-158804875,158804981-158805018,	3	exon	333	AA-AG	CTTAAAGCGAGTTGCAATTGATGATTTTGATGATTTTGTGTTCTCTTCTGTTGCTGGTGGAAATAATCCTGATACAAAAGAGCACTTAGAACCATTAAGTAATTCTTGATGCTCTGCAACCACGTAGTCCTTGTTCTTGTCCAGGAATTGATCAGATTGATATGTTACATCCCCAGCATAATGTTGAATTGTAAATGCAGTACGAGAAAGCTTTGGTTTGGTAAATCTTTTGTGGGTCTTGAACTTTTCATACAGCTTCTGAGACAATGTCTCGTGTGTGGACTTTGGAAACATGCAGGCTTCATCAAGAAGTGCAATAATGCCACCTGGTTT
circ_000645	chr8	79787530	79787723	-	Zm00001eb345290	79787530-79787723,	1	exon	194	AT-AG	CTTGAACTGCACGATGTTGTTGATTGCGTCACTAACTAGTTCCCAGTTTTGACCCATATCATGGACAAGGACAACAAGTGCCTGAAATATTCAAGATATTTAGCTATCACCACAAATCATACTCAAAAATAAATATATAACTTCAAACCCAAAAGAACCTGATCCTCGAAGTTTGACCATCCACCAGAAGTCAT
circ_000646	chr8	64050755	64051347	+	Zm00001eb342490	64050755-64050839,64050936-64050994,64051124-64051204,64051276-64051347,	4	exon	297	GC-AA	TTTCTTTCCCTCTTCCACAACAATCCCTCTAGCTGCCAATTCAGCTGCCAAAGCTTCCTTGGCTGCTTGTTCCTCAAGGTACTCTTTGTTCATTTCCTCCCAGATAATCTTTTTATATTGTGTTTCTTCCTCATTGTGAAGGTACCAATCAACCTCTACATCGTCGATGTCAGAAAGGCTTTCTGGATCAGCATTGCCTTCACAATTTTCACCTCCCTCTTCAGGATCCTTCGGTGGCACAGAGTCATTTATGAGTCCCCCAGATCCAATTGTTGAAGATTTATCCCCGCTTAAAGC
circ_000647	chr8	29948662	29949280	-	Zm00001eb339340	29948662-29948749,29948862-29948951,29949161-29949280,	3	exon	298	CA-TG	CAATCTTAGCCAGCTCATCGAGGAACTTGGTAACTGCAGTCGAGTTCTTCTTGCTGATCTTGACTGGCTTCTTATCCTTGAACAGAGCCTTGACCTCAGGAGGAGATGCTTCATAAGCCTCCGCAACCTTGGGCTCCAGTTCTGCCTTCTTCTCCTCAATCTCCTTGCCAATCTCCTCCTTGTTGAAGGACTTGAAGAAGCCTGCAGCTGCAGCCTTCTTGCCATCCTTGTCGAAGATCTTGTTGAGGCCAGGCAGAACCTTGGTCTTCCACAGACTGGCCATCTATCTCAACCTCTG
circ_000648	chr8	117966956	117967267	+	Zm00001eb351100	117966956-117967267,	1	exon	312	CC-AG	CTGGCTTCTCATGAAGTACAGGGTACGGCTGCAATAGCTCATGGTTCATGCATTCCACCAAGCCTAAGCGTGCACGCTTCTCTTCTAATGCCCTATTGCAATCCATAAGCTCATGTTACAATAGACAACAAAAGTAGAACGCTTCAAAACTCAAATTCGTTGTGCAATCACAAACCTAGCAGTGAAGGGCATGATTGGGAACTTCTGGCTGATTTCACTGAAAATAAATCTTGACGCTTTCATCTTCAGGTTATAATTCTTGTCTACAGCCCTTTTGTAGATGGTGGTCTGCTTCTCATCCAATAACTTGGG
circ_000649	chr8	143675305	143676117	+	Zm00001eb357330	143675305-143675399,143675638-143675840,143676020-143676117,	3	exon	396	GA-AG	CTTCAGACGATGTTTTCCAAGAGGTGGGCGCAAACATCCATAAGTTGTTGGCAACACACTTTCAGCAGCCGATGTGTCCAATAAATTCAGCAAGTTGCCTAGACTCTCAAGCATACCATCAACTGTCTCTGGACTGGCCATGACCAATGCCCCATGACTTAAGTTGCTTTTGAATGCTTGATACGAAGCTGATGCTAGTCTTTTTGGATCCAGCAAAGATATGCACACTGACAGTGAATGAAGCAGAACAGATTTGGGTCTTGATTCTTCAAGAGCGTGATGGAACAACCTCCGAACAAAACTTGGACTGCATATCTTTGCAGCAAGAGATGGAGGCGCACACCGAGTAACTGCACATAGAATTTCCGCAGCATTGGCATGCACTTCAGGAGAATC
circ_000650	chr8	20915839	20916226	+	Zm00001eb337380	20915839-20916226,	1	exon-intron	388	GT-TG	CACTGCACATCCCTGTCATTGCCCAAAATTGGTGGTTACTTGACTTGCCATAAAGCAAACTTTTGTATATCATTAATACTCTTGAATCACGTGACAGCCTGAAAGACATCCGTTAGGAATAAGTGAAGGTATCCATAGATGCACTTGCAAAATTATGAGTGCACAATTTATATTTACCAAAGAACTCTTCTATGATTTTTTTTCTATTTTGGCTCAAGGATGTGTGCATCTGCACAAACTTGAAAAAGTTATTGGTTTAAAAAGTAACAGGAGAGGACTGTTGGTAGAGATGAAGAATTAGAAGCCCCTCCTAGTTTAAGGTTGTTGCAGCACAGGTCAAGTCACATTTTTTCCAATTTGTCAATATCTCCAATTGAGGAAAATCCAC
circ_000651	chr8	148939726	148940081	+	Zm00001eb358580	148939726-148939764,148939890-148940081,	2	exon	231	CG-AG	CTGGTGCTCTTCGTGACGCTGTACCAGCGGCTGCCCACCAACGTGACGCTGCCCAAGGAGCTGCACCCCGTGTTCTTCCTCTTCGTGGCCGCGCCCAGCGTGGCGTCCATGGCATGGGCCAAGATCAACGGCCAGTTCGACAACGGCGCCCGGATCGCCTACTTCATCGCGCTCTTCCTCTACATGTCACTGGCGGTGCGCATCAACTTCTTCCGGGGCTTCCGCTTCTCG
circ_000652	chr8	78667217	78754359	+	Zm00001eb345130,Zm00001eb345140,Zm00001eb345150,Zm00001eb345160,Zm00001eb345170	78667217-78667509,78754354-78754359,	2	intergenic-genetic	299	AG-AG	CTAGCACTCGTTTACATCATCGTCTATCATAATTGGATGCTCATGGTCTCTTCCAGCGAGCCGCGACGACCCGCGTAAGAGAGCCCTGGGCTGCTGTGCAGCAGCTCCAGCGTGGCGACCTCTCGCGGTCTTCTTGCGGGCAGTATGCTTCTTACATGTTTGGAGCTCCTCTTTCTCCTCCGGGTTCTTGGTCTGGGAAGGGGGCCTCCTCTTGGGAAAACTTTGAGGGGTCGCGTGGTGAGAGCGCAGCCGCCCTTTCCATGGCGACATTGGTGTGTACACATGTTCAACCAATAGCT
circ_000653	chr8	117966956	117967092	+	Zm00001eb351100	117966956-117967092,	1	exon	137	CC-AG	CTAGCAGTGAAGGGCATGATTGGGAACTTCTGGCTGATTTCACTGAAAATAAATCTTGACGCTTTCATCTTCAGGTTATAATTCTTGTCTACAGCCCTTTTGTAGATGGTGGTCTGCTTCTCATCCAATAACTTGGG
circ_000654	chr8	129694798	129695257	-	Zm00001eb353990	129694798-129694938,129695114-129695257,	2	exon	285	AT-AG	CTCATGTGAGTGACTTTGCATGTGCTGCTTCAGATGAGCTGGTTTCTGGAAACAACGGCCACACTCTTGGCACCTATGTTCCTGCTCATGAACAATCTTTTCCCCATCTGAGTTGTATATTTCTGATTTATCAAGTTCATCCTTATGATGTGCAACCATGTGAGCTTGAATTAGGCATTTCTTTGACCTGACAACTGTGCAAAATTCACATTTGTAACGCCTTATATCCTTGCAACCCTTCTGTCCGACACTTGCATCTCCCTCAACATGAACTTCAGAACACAT
circ_000655	chr8	153123582	153123728	-	n/a	153123582-153123728,	1	intergenic	147	CG-GT	ACTGGGATCTAATACAATGGCTAGCGATGGTGATGCTTCACCTTCACGGAAGCATATGTTGTTGGAGTTGCCTTGTGATGAAGAAGGTGCAAATGTGAGCCAAAATGTTGGTGTGTCCGCATCATCAGCCACGACCCACACCTGCCG
circ_000656	chr8	90582252	90582524	-	Zm00001eb346860	90582252-90582524,	1	exon	273	GT-TG	CAAAGGATGTCGACACCAGGAGCCCCGAGCCTGGCCACGACAGCGGCGGCTGTCCTGTGCGTCCTGGCCGCGGCGCTCGCGGTCACGGTCGCGAGCGGCCAGCAGTGCGGGCAGCAGGCCGGCGGCGCAACGTGCCGCGACTGCCTCTGCTGCAGCCGCTTCGGCTTTTGCGGCGACACCTCCGAGTACTGCGGCGCCGGGTGCCAGAGCCAGTGCACCGGCTGCGGCCCGCGTCCCGCGGGCCCCGGCGTGGCATCCGTCGTGCCGAGAGAC
circ_000657	chr8	112066244	112066425	-	Zm00001eb350120,Zm00001eb350130	112066244-112066425,	1	exon	182	GC-AG	CTCCACACACACACAACACACAGGTACACTACACAGACGCTATGTACATCTAGACACCTCATGCATGGTCTGGTCGCATACCATGTCTCCTTTGATCCTTTTGTGTTTTACTGGCCATCCCTTCTACCTCCCCACTGGCATGCCATCATCTGAAACCCCACAACAAATCAACCTTTCCCTGC
circ_000658	chr8	79815517	79816450	-	Zm00001eb345290	79815517-79815600,79815757-79815936,79816196-79816450,	3	exon	519	GA-AG	CTTGTGATACATGAAAAGAGATTCCAGAGAGTCCCTGTATGCCAGCACTGCACCAGGTGCTGCTACTGTATAAAAGAGACTTTCTTCTGAGAGATGATCAGACACTTTCAAGACTCCAAAGTCATTCAGCCTGTCAGGAGTTGGTGGAGCTTCAGGCAACACGTGCAAATCAGCTGTTCTATTATATTCAAGAAATCGAACTGCATAATCATGAATCTGTGACCGTTGCTGGCTGGATTCTTTCGCTTCCAGTGAATTGTGACCCTGTTCTTTTCCTGCTTTGACTCCCGAAGGATCTATCTCCTCCAGCATAGTTGAATTGTGTGGCATCACTTTAGCTGTCCTGTCAGCAGTCTGTAAAGCCTCAGCTGAACGCCAGAAACTCATGATACCCTTTGC…
circ_000659	chr8	13769582	13769790	+	Zm00001eb335590	13769582-13769790,	1	exon	209	GT-AT	ATTTACCACCGCAGCAGCCACAGCAACCAGCTCCTCAGCAGCAGATTGTTTCTGCCGGAAACCAGCATTTCATCCACAACCCGGCCACTGGCACCTTCATTCCAATCCAGTCCTATTACCACCACCACCCTGTTCCACAGCAGGCACCCCAGACCGTGCCGAGGCAGCAGCAGGCACCCGCATTCGACCCAAACACGGGGATGTACTAC
circ_000660	chr8	177570873	177571455	+	Zm00001eb369140	177570873-177570878,177571090-177571174,177571285-177571455,	3	exon	262	GT-AT	ATTGTGATCGCACCAATGACTGGCTTGATCGGACGTTTTCAAAGAGTACACTATAATTGCATCGATGTCCAGCTTGATCAACCAGTATCTCAATATATCCCAGTCGAACTTTTTCAGTGAGACGCCATCGCAACGGAGATCCACGCCTTGTACATCCCATGGGGTTTTTGCGAGTGAATATTTTGGGGATCAATGTCATTAAATAAATTGCTAAAAAAGCGGAATCCATCTGGACTAACATCTCTGCACAACAGGCAAATAC
circ_000661	chr8	49445109	49445606	+	Zm00001eb341370	49445109-49445606,	1	exon	498	GT-GG	CCAGTTAGAGAACTTGAAGCAAAGGACTCCAGATTCTTCAAAACAGAATCCATCCGGTTGGAAGGTCCAAGTTGTTCCAAGGATGGAAGTCCATTATTTAAGCCTGGTGATGATAAAGCCCAAAGGACAGAACATACTTCACGAGTCAAGTCACGTAGCAACTTTTCTTCCATTACCTCTACCTTCAGTTCTGACCCAGAAAGATTACCAATGCTGTCAGGAACCTTAGCCCGACCCTCATGAAGAAGACTGGACCATGAATAATTAAGAGCTTGCTGACAGTGGACAAATAACGGCTGCAAAAGGTTCACTAGCCACAGCCATAAATCGGCAGGGCAATATTTAACAAATGGAATAATAACAAGGTGGATAAGTTGGCGCAGATGCCGAAACTCCATA…
circ_000662	chr8	163872809	163872868	-	Zm00001eb362710	163872809-163872868,	1	exon	60	CA-TG	CACCTCCCTGCTCATCGCCTCGAACTCCTCCTTCGTCACCTTGCCGTCCGACCTGTGGTG
circ_000663	chr8	151603995	151604103	-	Zm00001eb359440	151603995-151604103,	1	exon	109	GA-TG	CATCCCCAGGATTATCATCGATAACCTTAACCTCAACCTCCATACCTGTCTCAGAATCAAGCATGAAGGGCTTCTCTTGACTGTCAGGACTAGCAACAGGAGCAGGCTC
circ_000664	chr8	163350225	163350383	-	Zm00001eb362490	163350225-163350383,	1	exon	159	GT-AG	CTGGCCAAGCACCCCAAGCTTGATGTGCCCAACTTGGAGGTGATTAAGCTCATGCAGAGCTTCAAGTCGAAGGAGTATGTGAGGGAAACCTTCTCATGGCAGTACTACTACTGGTACCTCACCAACGATGGCATTGAGCACCTCCGCAGCTTCCTCAAC
circ_000665	chr8	165213443	165213548	+	Zm00001eb363120	165213443-165213548,	1	exon	106	GC-TG	CATCCTTCGATGAAGCCTTTATCCCCGCGCGAGGTCGTCTTCTCCCGGCGTCGTCCCTTCCTGCCTCCCTGCTCCTGCTCCAAGCCTGCAGCCGCCGTCGGGTAGC
circ_000666	chr8	133176187	133176522	+	Zm00001eb354640	133176187-133176522,	1	exon	336	GT-TG	CAAGCTAGGTGCTCGTCTCACCGAGGTCCGCAAGAACGGAACCTGCCCCTGGCTCAGGCCTGATGGGAAGACCCAGGTGACAGTCGAGTACCGCAATGAGGGTGGTGCCATGGTCCCCATCCGTGTCCACACCGTCCTCATCTCCACCCAGCACGACGAGACAGTGACCAATGATGAGATCGCTGCTGACCTGAAGGAGCATGTCATCAAGCCTGTCATCCCTGAGCAGTACCTTGACGAGAAGACCATCTTCCACCTTAACCCATCTGGCCGCTTTGTCATTGGTGGACCTCACGGCGATGCTGGCCTCACTGGCCGCAAGATCATCATTGACAC
circ_000667	chr8	12720881	12721203	+	Zm00001eb335210	12720881-12721203,	1	exon	323	GT-TG	CAACTGCAACTTCTCCTTCTCGGGGCTCTACACCTGCGACGACGTCAAAAAGGACTGCGACCCCGTCTGCAAGAAGTGCGTCGTCGCCGTGCACGCCTCCTACTCGGGCAACAACAAGTTCAGGTGCACCGACACCTTCCTCGGCATGTGCGGCCCCAAGTGCTAGCTAGAGAGGAAGAACGCGCGCTGCTGCTAGCTGCTATAGCTTCGTTCTTCCGCCGCCGGCCGGCCGCCGGCCGGTGCATGGTTCACGTACTGTGTGTTGTGCTACTACGTACTGGCTTCTTGTGTGTTCGGTTCTTGTTGTTCTCTCGACAGTGCAC
circ_000668	chr8	18821550	18821996	+	Zm00001eb336890	18821550-18821683,18821775-18821831,18821919-18821996,	3	exon	269	AC-CT	AGTTGCATGTTTAGGTCTACTGTTGGATCAGCGGGTGCAGTTGCAAATGCAGCTTTCAAACTCTGTTTCTCGAAGTACCTTGATATGAAAGGATGGATTGAAAACATGACTTGCATTATTGAAGCCATATAGCAACTATTCCCAAGATTCGCAAGACCAGTATAGCCGGGTCCAAACAGAAGCTCAGCGTCTTTTCCACTTTCTTGTATTCTATTCCAGTCATAATTTGTGTTAGCATCAAGTTCCCTCTCAGCAGTAGTCATCTCAGT
circ_000669	chr8	76371536	76371748	+	Zm00001eb344770	76371536-76371748,	1	exon	213	GT-TG	CAGATCTTCATGCTCGACTGGGTGCGGCGGCTGTCGGACGAGGGCAAGCTGCTCAACGCCGCGGACGCGAAGCTGCCGGACGGCGCCTCTGCGCTGTTCGACGTCGCGCGGCTCATGCACCTCGGTCTCCTCTGCTCGCTGCACGACCCCAGGGCGCGTCCGACCATGAGGTGGGTGGTAGAGAACCTCTCCGACGGCTGCTCTGCTGGCGAC
circ_000670	chr8	169407128	169473413	+	Zm00001eb365080,Zm00001eb365090,Zm00001eb365100	169407128-169407333,169473408-169473413,	2	intergenic-genetic	212	AA-TA	TAATTTCTTCTTTGGGGTAGGTGTCTGTTCTTCCGAACCAGAATCATCACTAGTATCTGTATCGCTTGACACTTCATCTTCATCACTGGACTCATCTTCCTCAGACATTTCACTATCACTATCAGTGAAATCATCATCATCACCACTAGAAGTTTCATCTTCATCAGCATTTTGTATACCAACCTTCACGGGAACCTTTGCAGTAGAAATTT
circ_000671	chr8	140827913	140828831	-	Zm00001eb356680	140827913-140828211,140828374-140828465,140828812-140828831,	3	exon	411	AA-AG	CTTCAAAATCATCATCGAATTCAATATCCTCCTCCTCTTCTTCATCTTCATCAGCAACTGTGCTTGCTCCTTTCTGAAAAGATGGTTTCATGTAAAGTAAAACGTAAAAGACACATACGTAGCTCCAACACAGACATGAATTGATGTAAATAACTAAATACGAGTGCATCCAAACAAGCCTTAAGGAAAGGTTTTATTATCTGGGATAACGAACCACTGCATGCCTTCCACTTTCAAAATACTGCCGTCCTGTGAGTTTCTTTTCCTTTGAGGATGTAAGAGCTGAATCTGGCATAAGTTTAGCACGCTGTAAGGCCAACTCAGCTTCAAATCGGTCTCTCCACGCCAAAAAGCTCTCTACAGTAACAGCTTCACCATGTGGTATAATAACCTCCTCTT…
circ_000672	chr8	153102591	153103343	+	n/a	153102591-153102720,153102803-153102905,153103246-153103343,	3	intergenic	331	AT-AG	CTCAGATCTTTCACGAGGATCTGTTAACTTTGGAATATATTTGACAGCTTCATTTTTTTGACCAGCATCAATGCATGCTTCCACAAAAGGTTTATAGCCTCCCGGTGGCCTTTTCTCCCTTGAAAATTTTTCCAAACCATCCCAGTTTCCAACTGTGGCTAAAGCGCACGTTTTAAGCCAGTACCACCTCTTATCAGGAACCTTGAATTCGGACTTCACTCTGAGTGCAGCACGCTCGTTTCCCATTGCAATACAGGTTTTTATTGTATCACTAACACTAGAACCCACAAATATTGGCTGCTTTGTGGAAACTTCAAGTTCATGCTGTGAT
circ_000673	chr8	172498712	172498918	+	Zm00001eb366560	172498712-172498918,	1	exon	207	GC-TG	CACTAGACGGTCATGGTGGTCGACCACCCTGCCTGGGCCGAGCGTAGTGTCGCTTGGTGACTTGTCGACGGCCGACTCCTTGGAGCAAAAGCCCCCCATTTCGTTGCTCCCTCTTCAACCAAACCCTAATCCTCCAGTGCCCACCGGGTAAGTGATGAGGCTGATGGGCAGGGTGGGCGGGGTGAGCTTCGTTCTTCCTTTCTTTGC
circ_000674	chr8	16044318	16046845	+	Zm00001eb336210	16044318-16044398,16044545-16044615,16045312-16045408,16046786-16046845,	4	exon	309	AC-AG	CTGATCAATGACACTTCCATTGGTATCACGAATGAGAGGCCGATAGTCTCCAAGGAAGAACTGATCATATTTTGCATCTTTCTGGGACTCTCCTTGCCCAGTTCCAATAATGAATACTCGCCCAACTTCATCTGATAAAATAAGTGATGTACCATCCGGAGAGAACTTCCCATCAACTAGTTTAAATTGTCCTGTTTCATAGATCTGAACAGGTTTCCCTTCCCATATATCCCAGATGATCGTCTTCCCATCATATCCAGCACTCATTGCTATACGAGGATTGAACGGATGCACATCTAGCACAAACGT
circ_000675	chr9	106254548	106255139	+	Zm00001eb388270	106254548-106254600,106254719-106254862,106254984-106255139,	3	exon	353	AG-AG	CTTCTTCCTCAACCTGCTCTTCCTGGCGGCCTCCCTATTCTGCGCGAGCCGCCGCAGGGTCTTTGGGTCCGGCGTCCGGGGCCCGGCCTCCTGGTCCGCCGTGCTCGAAGCTCCCGCGGCGGCGCCATGATGCTTGCCGCTGCCGCTACCTTCTCTCTTGATTGCTGCCTTGGAGCTCTTACCGGCGGCGAGCGGCGGCGGCCCGCCTCCCACCTTCAACGACGACGGCGCCTGCGGGTTCTTGGAAGGGCCAGCGACCTGTGTTGCTGCTGCGGGAGCTGAAGAAGAAGCCATGGAGCCCTTTGGGGATGGGCCGATGTGCATTGGCTGGGAGGGGAAGATGTTGAGAGTCT
circ_000676	chr9	135002384	135002523	-	Zm00001eb394660	135002384-135002523,	1	exon	140	GT-AG	CTGCTGCACAGTCCTCGATCGACGCTATGCCCACAGTGAAGATCACCCAGAGGCATCTCAGTGGGGACTCGCACTGCCCTATCTGCAAGGAGAAGTTCGAGATGGGATCCGAAGAAGCAAGAGAGATGCCATGCAAGCAC
circ_000677	chr9	100748077	100748312	+	Zm00001eb387250	100748077-100748312,	1	exon-intron	236	GC-CA	TGTCGAGGTCGGGAATGCCCGAGGAGACGAAAGAAGCACCGTTCGGGCCAATCTTAACGCCAGAAGCGCCGGATGAGGACGCCACCAGGTTAGATGTGGCGCGGGAGAAGCTGCTCCGGCCAAGGGTTCGGCCACCGGCGGCGGCCATGACGGCGGCTGCGATGGATTCCTGGAGAGGTTTCGGTTTCGTTTCTTCTTTGTCGTCCTTGGCCCTACTTGCGGTAGACGCGTAGGGC
circ_000678	chr9	110111858	110112077	+	Zm00001eb388840	110111858-110112077,	1	exon	220	AT-AG	CTGGGCGGGTGCTCGTCGCCGGCGAAGGTCCCGAAGATGGAGACCTGAGCACCTGGCGTAGGGCGGGGTCGGCCGCGCGGTCGTCGGCACCAGAGACAGAGAGAGAGAATGCCGGGGTGCGCGGAGGAGATCTCGGCTCGGAGGCAGGCGGCGCTGGGTAAGGGCACACTCAACAAGGTCACCTCAGCTCTCCGTAGGAGTCCCGAGTCCGCATCAGCAT
circ_000679	chr9	60187427	60188085	-	Zm00001eb382690	60187427-60187495,60187595-60187742,60187862-60188085,	3	exon	441	GT-AG	CTTGTCCATTATCAAACACAAAAGCTTCACACCTATTGGTTGCATTCCTTCAAATTGCCCAGTACTAATCTGGTATGAAAGTGAGACCAGTTCCTGTAGTTTAAGCACTAGCCAATCATTTGACAAATAAGTGCCTTGAGATATTGCGCTCCTTGCCAACAAGAGGTCAAAATGAGCAGGTTCTGCTCCAACTGCAATTGGTACATGGCTAACGCATTCTGCAGCAAAAACCCTGGTACGATATCTGAGGTGTTTATTCCTTGGAGGAAACTGGCTGGATATAGAACCAGCACAGCGGATTTGCTGCTGCTTTGAGCTGGAAATCATGTTGTCTTCATCTTCTCCATAGTACACATCATTCTCAGATGTACTATCAGGAGGATTATGCCCAAAACATGA…
circ_000680	chr9	133685247	133687014	-	Zm00001eb394310	133685247-133685252,133686637-133686730,133686812-133687014,	3	exon	303	AT-AC	GTATTGCTGCAATATCGGGTTGGGTCGGTCGCAGCAGTATCCCTCGACACCGAGGACGAGATCCCTAGCCCCAGTGCCGCACACAGACTGCACAAACCGCAGGAGGTAGTGGTAGGCCCCAAAGGTGAGGAAGTGGTTGATGCTCTGGATGAAGGTGCCCTCGAAGATGGGCCATTGCCCGCAGAGGAACGACACCACCACCAGCGCCGTCACTGACCCGTGCACCAGCAGCAGCCACGGCACCTCCATCCCGGCAGGGATCCCCACGCCTTTGCCGGGGGACCGCTGCCGCCGCCGGCAAAT
circ_000681	chr9	125370074	125371228	+	Zm00001eb392370	125370074-125370132,125370939-125371034,125371123-125371228,	3	exon	261	GT-AG	CTCATTGTCGACGCGCCATGGACGCCAAGCTGCTTCTATAGGAAGCCCAAGATTGTCCAGCACATATTGTGTTGAAATGAATGAGCACACTGCATCCATATCACCACTGTACAGCCATATTCTCGTGCCACTTGAAATGAGTTTCTTGATTGATGGCAGCATTGTCTCTGGTGAATCTTTCCAATTATCAAATATCTGCTGACTACAGTCCATCCATGGGTAGCCTAACCCTGTTGTGTTTGCATGGAGTGCCCTTTGGAC
circ_000682	chr9	16119863	16123386	-	Zm00001eb375140	16119863-16119868,16122392-16122507,16123294-16123386,	3	exon	215	GT-AG	CTGTACTGATCGCAATGTTATTTCTGCTGACAAAATCGATGCAACAGTTAACGCCTGAGATAGGCATCCCAATTCATTTGCTTCAATCAAAGTCCTTGAAAGAGACGGCTCAAGAGGAAGCTCTGCCATAACTCGTCCAACATCCGTTATTTGTCCGTTTTCATCAATTGCATCAATGAGGTATAATTGCCTCAAAGCATCTTCTAATGACTCAC
circ_000683	chr9	143366510	143367762	-	Zm00001eb396860	143366510-143366843,143367467-143367556,143367653-143367762,	3	exon	534	GG-TG	CATTTGTAACTTTTGGTGGATAAGACAAGAAGAGAGATCAATGCTTGAAGTGCTTTTCATCCTAGGCAATCTTTCTGATTCCTCCCAGCACCAACGAATTTCCCGCACAAAATCAATCCATAGTGTAGCAATTGCTGGCAAAATGGGTCTTTTATCAATAAAGGTCTCCAAAAATCACAAATCAAAAGAGAAGTCAGCACATGATACAGACCGCATATATTGCAGTTGCCAAACCACAGTGCATGCAAACAGAACTGGCCAAAAAGTGAATCTGCAGGTGCACCTCGCATAGCACGACTATACTTGTTTTCTGCTTCCATATAGTTGCCAGTCTCATCACTGAAAAGATCTTTCATAACACGATCAATAACTGATGGTGGAGGCACAGTAGCAGTAGAT…
circ_000684	chr9	143366510	143367762	-	Zm00001eb396860	143366510-143366843,143367467-143367563,143367653-143367762,	3	exon	541	GG-TG	CATTTGTAACTTTTGGTGGATAAGACAAGAAGAGAGATCAATGCTTGAAGTGCTTTTCATCCTAGGCAATCTTTCTGATTCCTCCCAGCACCAACGAATTTCCCGCACAAAATCAATCCATAGTGTAGCAATTGCTGGCAAAATGGGTCTTTTATCAATAAAGGTCTCCAAAAATCACAAATCAAAAGAGAAGTCAGCACATGATACAGACCGCATATATTGCAGTTGCCAAACCACAGTGCATGCAAACAGAACTGGCCAAAAAGTGAATCTGCAGGTGCACCTCGCATAGCACGACTATACTTGTTTTCTGCTTCCATATAGTTGCCAGTCTCATCACTGAAAAGATCTTTCATAACACGATCAATAACTGATGGTGGAGGCACAGTAGCAGTAGAT…
circ_000685	chr9	97094013	97094913	-	Zm00001eb386590	97094013-97094114,97094183-97094255,97094783-97094913,	3	exon	306	GA-TG	CATTGTCTTCTTCTGCAAGGACTGTAAATCACTAACTCTTTGGTTCTCCTCGGCTTCGAAAACAAAATTGAATGCCAAAGATGCATCCAAATTTGGAAATGTCTTTCCAATTTGGTTTCCATTCAGTGAATTGTTCACAAATATGCTAGATGTATCACTGATGTTTAAGATGATCCTCACAACACTATCACTACCAATGCCACCTTCAATATTGTGAAAACATTCAAGGGAACTCCTTAATTTCTCCACCTTCCGTTGAATAATTTTGAGTTCAAGCCTCTTTTCAGAAATGATATCAAGTTCTTC
circ_000686	chr9	137568350	137570082	-	Zm00001eb395250	137568350-137568355,137569778-137570082,	2	exon	311	GC-AG	CTTTCCCTGTTGGGCCTAAGCAAGGACCTGATGACTTGTGCAGCTTTCAGCCTCTGCTTCACATCAAGGTAACTTGATGGCTCATCGAACATGTAGATTTCCGCATTTTGCACTGCAACAACTGCTATTGCAAATCTCTGGAGCTCACCGCCAGAAAGATCTCCTACATTTCGGTCAATAACTTGGTTTAATTCAAGATCAACACACAGTTCAGCTTTCATATCCCTCTCGTCCTTCTGTTCAAGCACTTGTCCTACATTCCCTTGAACAGCCTTTGGGATGTGGTCAACATACTGCGGTTTGATGATTGC
circ_000687	chr9	161278539	161279063	+	Zm00001eb404320	161278539-161278730,161278802-161278915,161278992-161279063,	3	exon-intron	378	GA-CA	TGTAGCTATACCTCCATCCCCATTAATAAAACTAAGTAACTCATCCAAAGATCTCTCATCTTTTTGCTCTTTCTTCAGCTTATGGCGCTCCTGGAGCTCTTTCCGCTTCTTGGCATACAACCGGTTCAGTAGGCGAATCCTAGCAGGACCATCATTTATATTTTTTAGGGGCTCCAATTTCTCTTCCTCTGTTAAATCATCTGGTAAATGGAAAATGTCACGAATTTCCTCAGGTGTCTTTCCTTCAATGATTCGAGCAAGCGCTCGGCCAGTAAGATCAACAAGTGGCTTTAACTGTAGACTGTCGGCTGCAGAAGTCAATTCGCAGAGTCTTTCTGTTTCTATCCTAACAAACTTTTCATCAAAGGACTTCCGCTC
circ_000688	chr9	145690786	145691036	+	Zm00001eb397650	145690786-145691036,	1	exon	251	GG-AG	CTGTCAAGCAGCTGCTGTAGGTGGTGCATACGAGCAAGGACACGCTCAGGCTTCATATCCCTCACCGGGGTCGGTGGCCTCTTGTCATCATTGTTCCCACCATTCCTCTCGCGGTAATCATCATATCCTCCATACCCAGGGGGTGACGAGTAGGAGGGAGAGCGGCGGCCATAGGGATCAGGCGAACCCCAGCGATCACGGTCCCGTGGTGATGGGCCATTAGCACTGCTGCTGCTGCCAGCATTTAACCC
circ_000689	chr9	60208057	60208689	-	Zm00001eb382690	60208057-60208161,60208244-60208315,60208400-60208522,60208621-60208689,	4	exon	369	CC-TG	CATCCTTGCTGTAAAGATATCATTCCCAGCTCGTGCTAATAAACCGAGACCCTCGCACGCTGCTCGCCGCTGTGCTGTAGAAATTTCAGGCTCTACTAAAATGGCCTTGAAAATGGACTGAATCATACTTAATATATCAATTGGCAATGATTGAGCACCACGTAAAGCGAGGAATTCCTTTAACCCTGACAATAGAGCAACACATGCATTTGTAATGAGAAACTTAAACCACAGGTACTTCTTCCCAGACTTCAGGCACTGGTCAAGATTGTTCAAGAGGCTTATCTTGACAGTGTTTTCCTGACATGCAAATATGGAACCATAACAGAGAAGCATCTGGTTGACGAGCATTTTCCGAATTGACTCTGG
circ_000690	chr9	95132051	95132214	+	Zm00001eb386310	95132051-95132214,	1	intron	164	GT-AG	CTTCTTTGGCGCTCTTGTTATATAGTTCTGTTTACCCTTTTATATTTTTTATCACATACTAGCAAACATGCCGATGCGTTGCAACAGAACATATAATTTGTTACGCGGTGCTCGTGCCAATGATAATGAGCTAGCTATTTTTGTTGGATTTAATTAGGTTTGAC
circ_000691	chr9	22309155	22309339	+	n/a	22309155-22309339,	1	intergenic	185	GT-CG	CGTTGGAAGCGGGCAGTGATCGCTGCTCTGTGAAGCCAGCCTCACGCCATGCCTGCCGCTTCAGGTCTAAAGAGGCCCAGGCCTTCGCCCGAGCCCCACCAGCCACAACCAACTTGGAACGGGCAGGCCGGCCAGTGGCACATACAGGCCCAGGCCCAGAATCCGTCAGGAAACATCCACACCAC
circ_000692	chr9	60176231	60188085	-	Zm00001eb382690	60176231-60176236,60187862-60188085,	2	exon	230	GT-AG	CTGGAGTCTGCAGCAAAAACCCTGGTACGATATCTGAGGTGTTTATTCCTTGGAGGAAACTGGCTGGATATAGAACCAGCACAGCGGATTTGCTGCTGCTTTGAGCTGGAAATCATGTTGTCTTCATCTTCTCCATAGTACACATCATTCTCAGATGTACTATCAGGAGGATTATGCCCAAAACATGACAGAACTTCACCTGTGTTTCTTCTAATTGACGTAGCAAGAAC
circ_000693	chr9	60242826	60244465	-	Zm00001eb382690	60242826-60242913,60242981-60243070,60243167-60243400,60244359-60244465,	4	exon	519	GT-AG	CTTTGACAAATGGCACAATCAAATGCTTCTGCACACCATCTTCAATTTTCTTTGCAGAAGCAGTTTGTTTTTTCCCGCCTTTCTTCACCTGGGCATCTGGATTCACTGCAAGAGCAAGTATGGCACCAAGTGCTTCGGCAAATGAATCTCTAACTGAAGATACACTATCTTCCAAACCCTTCACACAATAAGACATAGAAGAATCGAAATCAGCCATCCCCAATGCAGGCCCACCAATATTAGCAAATGCCTTCAAGCAACGTGCTGCCGCTGCTCTGACAATGAACGATTTATCACTTACACCTCGCATGATGATACGAAAAGCCTCTTGATAAGCTGCAGCAGCACCACCACCACCTGAGCCTTCCAATGCATTCTCAAGCAAGAGAAGAGCATCTT…
circ_000694	chr9	31220628	31222513	+	n/a	31220628-31220699,31220776-31220980,31222508-31222513,	3	intergenic	283	AA-AA	TTGCATCATTGCAATTCAAACAATTAGTGTGGCTCCTTTTAACTACTGGATCAATTGAGGAACGAATCGTTTTTTCCAGAGCCTCCAAGGGAGATCTGTCAGATGCACGCAGCACATCTCGCAAACTATTGCCGTTCCCTAAGTAAATGTAATCGGCAGGGTGTTTTTTGGTGCTTCCAGCATGTTGTTCAAAGTAATAAGATGAAACAGCCTTGGAGCCATTACAGGACAGGCAAAAGCAACGTATATTGCAACCAGTAATCACTCCTTTTAGCACAGCCTT
circ_000695	chr9	89297680	89297793	+	Zm00001eb385590	89297680-89297793,	1	exon	114	CA-AG	CTCCGCAGCGCCCGCGGTAACCTCCCCACGCCACGCCACATCGCGTGCGAGCCCCAACCGTCGCCGGCCTCCCAATTAAGCCGCCCCCGCGGCGCGATCCGGTGTCCACCGCTG
circ_000696	chr9	59020612	59021061	+	Zm00001eb382660	59020612-59021061,	1	exon	450	GT-AG	CTCTCTAGATGTGATGATTACTACCCTTTCATCAGAACCAGCAATAATATCAGATAGTCTAACATCAACACCAACATCAGCCTGTAGCATCTCCAGTATTCCATCATTTGTTGCAACTAAATTGTCAACCTTGTCATTTGGGCATAGAATTCGAAAAATTATGTCATCGTACAGGATATCTGGATGTTCAATCACCTTGCCATCATTTGAATCAAACTCATATCCTGGTGGCTCCATGCTAGTGTTGTTCCTAATCTGATCAGATCGTCCCAGAGATTCCTCGTATGCAGGCATCTGCGAAACACCCAAATAATCATCTTCCTGAGAAATTCGAGGCTCTGGTGAATTCATTCGCCCACGGAAGGGACCACGGTCACGGTGTAAGCTTTCCTTTAGGCG…
circ_000697	chr9	12845504	12846106	-	Zm00001eb374100	12845504-12845584,12846008-12846106,	2	exon	180	GT-AG	CTTAAGGAGAGAGAAATACGGATCAAATGGATGGTCACCGGAAGCAGTGTCAATTATGAAGTGCAGGGAGTTCTTCAGGGACTCCATTTGCTGTGTGTCTGATGATATAACAAAATTATCTGCTCCAAGGAGGTTGATGGCTTCATCTCTCTTTGATTCACTTGTACTGAAAACTGTGAC
circ_000698	chr9	145064034	145064150	-	Zm00001eb397440	145064034-145064150,	1	exon	117	CT-GG	CCAAATACTTGAAATCTCTTGCCTCCAGGCGTTCATCATGTGCAGCAAACCCAGTTCCTCCTTTCTCCAATGGAACCAGATTCCTCTCCCTGAATGGTTTGCTGCACTCCAAGCAAG
circ_000699	chr9	127811463	127811812	+	Zm00001eb392880	127811463-127811662,127811766-127811812,	2	exon	247	GG-AG	CTGTCCACCCTACAAGCTGATACCCCATACTCTGAATTTCACCACAGGTTCCAGGAACTTGGTCTGGAGAAGGGTTGGGGTGATTGCGCTAAGCGTGCACAGGAGACTATCCACCTCCTCTTGGACCTCCTGGAGGCCCCAGATCCGTCCACCCTGGAGAAGTTCCTTGGAACGATCCCCATGGTGTTCAATGTCGTTATCCTCTCCCCTCATGGTTACTTCGCTCAAGCTAATGTCTTGGGTTACC
circ_000700	chr9	129097139	129109791	-	Zm00001eb393120,Zm00001eb393130	129097139-129097144,129109018-129109113,129109322-129109379,129109488-129109791,	4	intergenic-genetic	464	AT-CG	CGAGAGCTGGATAGAATCCAGCTCGATTTGGCGTATGTTATTCTCGACGCCTTTTGTGTACTCGCGCAGTTTGATGCCACTGGCTAGAATGTTTGCGACTTCCTGGTCATTCTTGCAGTTGTCAAGCTCCTGCTGCAGCCCCTCCAGGGACTCGTCGTCACTGGTGACTTCCTCATCGAGGGCGAGGTCGCCTACGAAGACCCCGAGATCGAACCTGTCCTTGAGCCCGTCGAGGGTCTCTGCAGCAGGGACGACCGCCATCTCGGGTCAGAATCGCCGGGGCGGCCGGCGGACAGCGTCGGCCGGCTGGCTGGCTAGCTCCGATCTAGATCTCCCACCGTTGGCGTTGAGGACTGGGATCGGATCGGACGGGTCCCCGGGAAATGGAGGAGACCCGGA…
circ_000701	chr9	162569354	162570454	-	Zm00001eb404710	162569354-162569513,162569622-162569733,162570357-162570454,	3	exon	370	GG-TG	CAAGTAATTTGTCTCCTTGACCTTGGCCTCGACATTCTTCAGATACAGCAATAGCAGCAACTTCCCCAGATTTATCCTCAAGAAAAGGGAAGAGGGCAGCACACGCTATGATTGAGCCATCTCTTTCCACGACAATAAATGATGTCAATGCTTCAAGAAGCTCTTGATCTGTTCGGCGCACCAGGACACCAGATTCTTCTAGAGGACGAATGATCTTTCTAATACCAGAAAGATCTTCCTCTCTGGCCATTCTTGTTCCTTCATACATATCCCTAGCTATCATCGTTCCAACACCATCTCTAGTGAATAGTTCTAGCAACAATGCTCCACCAACAGTACCATCTATGATATGCACTCTTTGGACACCACC
circ_000702	chr9	134773915	134775759	-	Zm00001eb394610	134773915-134773920,134775364-134775594,134775702-134775759,	3	exon	295	TA-CT	AGTGAGCTTCCGTAACTGCATGACAATATTCATCAGGCTAAGTAACTTCTTGTCATTTAGACTGCCACGACTTCCAGCAAGCAACTCGTTAAGCGAGATCTTATTTTTTATGGCTTGATAGAAAACTTGTTGACGAGAACTCAATTTGCAGGGAACAATTTCTTCTTTCTTTTTGGTCATTTCAGCAATGACATCAATCTTAACCCGGCGGAGCATAAAGGGCTTCAAAATAGCGTGCAATCTACTAAGTTGATGTTCATTCAAAGCTCCTCCATGCTCAGCATGACCCTCAATA
circ_000703	chr9	162504920	162505281	+	Zm00001eb404700	162504920-162504925,162505175-162505281,	2	exon	113	CT-GG	CCGAATATATAGCGTAAAACTTTTGACTTTCCCTCAATTCTTGCAATCACTTTGATGATTCCACATAATACTAGAGTTGTAAATGCAAAGAGATAGTCCAGAGAACTTCCAAG
circ_000704	chr9	124991496	124992488	-	Zm00001eb392300	124991496-124991708,124992429-124992488,	2	exon	273	GT-TT	AACTGTTTTTGTATCCTTTACTTCAATAGGCAGTGAGTGGTTCGACCTCCAGATTTTACACCAAAAATCCAAGGGAACGTCTAGCCTAGCTAGATACCGTGGACACCCATGGCGCGGAGCAAAGTCAAATGATTCTTCATGGCTTCACTTCCTCTGCAGCCGCAGGAGCTGCTTCCTCCTCCTTGCTCTCTTCTGTCTTACCTCCTTCTTCATCTTTGTTAGCACTTTCAACCACATCATCTTCATCATCCCCAATATCGTCGTCATCAGCAC
circ_000705	chr9	12796132	12797093	+	Zm00001eb374080	12796132-12796137,12796369-12796458,12796917-12797093,	3	exon	273	AT-AG	CTTGACTTTGACATGCCATTGTCACAGGCTGTATCAGAACTCCGGTTTGGACGCTGCCCTTCATTTTTTGAACCAGTAAATGCTAACTTTAAAATTCCATTTGGGCCATTACTGGATATTGATAGTTTGCTTTTATTAAGAATGCTGCCATCTGATCTTGCCCTCTTCATCAATTTACATGTCTCGTCATCAAGTACATGCTCATCACCAGATTCTGGCTCCCAAAGTGCAGGTTTTCCCACCTGTGGCTGGAAGTATCCTAAAAATGAATAT
circ_000706	chr9	116330087	116330417	-	Zm00001eb390190	116330087-116330417,	1	exon	331	GG-AG	CTCGCCTCATGGTAATATAACATCTTGAACAACCATAATACAAAATGAAATGCAGTTCTGTCACGACAACATCGCATTCATAAGCAATACCACCCATCTAGTACCTAGCAAGCATCACCACACGAACCTCAAACTGACGAGTACTAACAGCGATACAAGGAATATCATATCTGTACCAAGCACTGCGGAGAATGACTTAGGTCTCTTCCTCTTCTTCCTCCTCCTCCTCGTACTCCTCATCCTCGGCAGTGGCATCCTGGTACTGCTGATACTCGGCCACCAGGTCGTTCATGTTACTCTCTGCCTCGGTGAACTCCATCTCATCCATACC
circ_000707	chr9	81657869	81658047	+	Zm00001eb384820	81657869-81658047,	1	exon	179	CA-GC	GCCTCCATCCAGCTCTCCAACCCGCACGCCTCGCATCAAGACTGACTGGGAGAACCCGAGTGTTCAGCCACCGTGGGCTGGGGCGAACTACGCGTCTCTTCCCAACTCCCAGCCGCCGAGCCCTGGGCACCAGGTTGCTCCGGACCCGGCGTGGCTAGCCGGGTTCCAGATTTCGTCTG
circ_000708	chr9	153991950	153992188	+	Zm00001eb400590	153991950-153992040,153992124-153992188,	2	exon	156	GA-AG	CTTCCTTATCTCTGAATACTGCCTTTGCCCCTTTCCCAACCAGAGAAGGATCCTGTGATGCAAACTTAATCATCTCAGCCTCCTTAATCTTTCTTATGTCCTCTTTAACTTCTTCTGCTGTCATCAGTCCAGATTTCTTCACCTGTTTTGAGGCTC
circ_000709	chr9	153347548	153347752	+	Zm00001eb400240	153347548-153347752,	1	intron	205	GG-AG	CTAAGTTATAACTTGATTAGATATTATATTTTAGTCAAATTATAATTATTAGCAGATTAACTTTGATTAGAAAGGTTGATCTACTAAACATAGGTTAAACAAATATCTAATTATAAGAATATGTGTTACGATACAAATAATGTTGTTACTGCGTAGAGTAGACAATATTAATACGAAGTTAACGCTTGAAATGTATAATCCTTCC
circ_000710	chr9	57434836	57435204	-	Zm00001eb382580	57434836-57434921,57435123-57435204,	2	exon	168	CT-TC	GATGTTGAGTTGACAAGCTGCACCACTCTTTGCTTGTATGAACGACATTGGTCCACAAGGTCCACAATGACCTCCTGCCTTAGACCCTCTCTGTTACCAGGATCGATAGCATTTAACATCTCTGAAAGAACATCCATGACCCCACGTGCATTCTGAATTTCTGTCAAG
circ_000711	chr9	141200499	141200780	+	Zm00001eb396060	141200499-141200780,	1	exon-intron	282	GT-GG	CCCTATTGGTGAGTAATCTTTAGTCATTTGTTTATAAGGCTATTCTCAATGGGGAGTTTATGTTGTTTCTAAGACTGCCGCATCATGTAAAAAATAAAACATGGATAAAGCATCCATCCTCACTGCATAGTTTCATTCTATGGTTTCAAATACATTTACTTCACGACTTATAGAGTTTGTAATTGTGCCCAGAGAGTTCTCTCTTAAAAATGTTGCCACGTCATTAAAAACGCTTATGTGGCACCCTATTTAATACAAATGAAACTCACATAAAACTTCCAC
circ_000712	chr9	144963597	144965617	+	Zm00001eb397360	144963597-144963741,144963841-144963920,144965612-144965617,	3	exon	231	AC-CT	AGTGTTCTCAACACCAGCACCGCGGTGGTAATCCATGGTAAGAGTTTCAGCTGTTCTCTTCCCCTCATCATAACAGCTCCTAACACCTATGGGATTGACATGTCCCCAGTAGCTCTCCTTCTGTGGATGCTCAAGAGGATCACCATACACTTCACTGGTACTAGTCAACAAGAACCGAGCCCCAACCCTCTTAGCCAGTCCAAGCATATTCAAGGTCCCCATGACATTTGT
circ_000713	chr9	27940535	27940627	+	Zm00001eb378930	27940535-27940627,	1	exon	93	GA-AG	CTTGCTCATGGCCTCTGCTATCATGTTACCAATTTCATAGTTGTTGCCAGCACTAACTGCAGCAACATCTGCAAGCTCACTATCTTCAACCTC
circ_000714	chr9	59039470	59040255	+	Zm00001eb382660	59039470-59039718,59040028-59040255,	2	exon	477	GG-AA	TTTTGAATGCCATGAAGTTGCCAGTTGTGATGCTTGGTGATAAGCACTCATTGGCATATCATTTCCGAGGTTGGGTCCTCCAGGTGAGCCTGCTACTGGAGAAATGGCTCCATGTACATTAATATTGCCAACTTGAATAGGACCAGACATCTCACGGTATAGAAAACTCCTTAATTTTGTTGTTACTTGTATCAGAGCATTCCGAGCAGCACTAATCTCTCCAACAATCTGTATGAGTTCATCTGACTCTAAAGCGCATAATGGAAGATCTTCTTTTGGTAATATCTGCACGTTTGCACTAGTCTGTCGCTGTATATCAGATAATGACCCCTCCCTTCCATCAAAGCAAGCAATTTCACTTGAAGGTACAAGTAGTCTTGTTGTGATAATGTTATCCTT…
circ_000715	chr9	38824812	38825412	+	Zm00001eb380580	38824812-38824915,38825060-38825143,38825301-38825412,	3	exon	300	GT-AG	CTTTTCATCAGAATCAGGCATGACACCAAGTAATCTGGGTGTAAAAGTTTTTTGACATTCTTCGGTGGGTTCGGTTTCATCTTCTTGTTGTGATAATGAGCGAGCAATGTACTTGCATTTTGGATGTCGATCACAGCCTATAAAATAGCCTTCACCATACCTACTAACTTTGAATCTCAAGGTTCCTTCAGAACAACTTAAAAGTATGTTTGTCGTGCATTACCTAGGGCAAATTCTATTGTCTGTGTCAACATTAGGGAAGAGGATAGGACCAAATTTTTCTTCGAGCATTCTCTCTAC
circ_000716	chr9	139163011	139163240	-	Zm00001eb395480	139163011-139163048,139163049-139163240,	2	exon	230	TC-AA	TTGGCAATGGCGGCCGGTCCGTTGCGGTCGAAGCGGACCTTCTCCTTCCACCACGCACGGAGGTTGTCGGAGGCACCACTCACTGGCTTGCCCTTCTCCGGAATGATCCCATACACAAACCCCTGCGCGCGGCACACCTCCATCATCTTGAGCATGTACTTGAGGATGCCGTCCTGCGCGCGCGACATCTTCTTGCGCCGGGCCTGCTCCTGCGACTGCCTTGGCTTGGA
circ_000717	chr10	87045737	87045860	+	Zm00001eb417170	87045737-87045860,	1	exon	124	CG-TC	GACCAACAAGGCGTCCTGCACCACTGCGGCGCCGATGCAAGAACCGGGCCAACGCCGAGTGACGCCGCCGGTGACGACGACGTGTTTGCCGGGACGACTTGGTCAGAGCTTCTCGCCACCACCG
circ_000718	chr10	66756900	66757125	-	Zm00001eb413950	66756900-66757125,	1	exon	226	GT-TT	AAGTCAACAGCGAGGTCGACGCCGCACTGCGGGCAGCGGAAGCGATCGAGGCCGTGGGGCACGTTGAGGACGGCCTTGCAGCGCGCGCAGGGGAGCTGGATCTTGGTGGGGTCCACGCCCTGCGCCCGGGGAGCGGAGCGGCGGGTCAGAGGGTGCGGCACTGGCTGAGGCGGAGGCGGAGGCGGAGGCGGCAGCGAAGGTGGAGGTGGTGGAGGCGGAGTTGGAC
circ_000719	chr10	1072934	1073213	+	Zm00001eb404990	1072934-1073022,1073125-1073213,	2	exon	178	GA-AG	CTTTAAGGATTGCTTGTCTCTTGGCATTGTATGCAGTATGAAACAATTTTTCTTTCAGCCCACCAGACTCCTTCACAGCATTTGTAATCGCAGTATAAATTCTGTTATATAACCGGGGAACACTTGCGAATATTGTCGGTCTCAAAGCAGCCAGATCATCCATGAGCTTCAAATTATC
circ_000720	chr10	114456243	114460754	+	Zm00001eb421500	114456243-114456248,114460603-114460754,	2	exon	158	GA-AG	CTGCTGGTTCAAAGCGAATGTGACCAGGCCGAACCACAACTGGGACAATCTCATCCGATGTATCAGATTCTTCCTCATCTGCTTTGATGCTTGAAAAATGAACATGTGATCCATTTTGATTGCTTGATGGGACAGGCAAGCCATCTTGATTGTTGTTC
circ_000721	chr10	128511441	128511516	+	Zm00001eb425140	128511441-128511516,	1	exon	76	TA-AT	ATGAATGGAGGAAATGAGAATGTGAATAAAGGCAAGGAGAAGAAGAGAAAGGGCAAATCTAATATGGAAGTACCTA
circ_000722	chr10	135122724	135122872	+	Zm00001eb427270,Zm00001eb427280	135122724-135122872,	1	exon	149	GA-GA	TCCTTCATCCCCTGCTTCGAGTCGTGCGACACCCTCTTCACGGCGACCTCGAGCTTGGACCCGGAGAGCACGCCCTTGTACACCCTCCCGAAGCCGCCGGTGCCGAGCAGCATCTTGTTCTTGAACCCCTTGGTCGCCTGGTAGAGCTC
circ_000723	chr10	117018404	117018565	+	Zm00001eb421980	117018404-117018565,	1	exon	162	GA-TG	CATATAATCAACACACATCTGCCTAGCCATGTCATAAGCTTCTGCGTCTCCATAAACTTGATCAGCAACAGCTCTGAATAGACAGTTCCCATCTTCGGCCATCTTTCTGATTTCCAACCCTTTCACTCGCCTTAGGTCATGGTCAAACATACGCTCCCTTTC
circ_000724	chr10	150780813	150782442	-	Zm00001eb433980	150780813-150780887,150780963-150781019,150781282-150781458,150781533-150781599,150782260-150782318,150782389-150782442,	6	exon	489	AC-AG	CTCTGTAAGCTCTGACAGATGACGATTCCGGAACTCGTTGATGGTTTCCTGAATCTCTGACATTGGGAGTTTTGCTTGTGCAAGGACAGCAGCAGCTAGCTGAAGACTTGGCTCCAAGGTCTCAGGGACAACCGCCGTTGCACCAGCTTTCTCCAAATTAACACCATGATCAACATCATGTGCTCTAACAAATGTCTTCACATTTGGGAAATATTTGTTCAACGCCCAGACAGCTCTGTAGTTTGCACCAGGAGTATCCAAAGTAATTGCAGCAGCACAAGCTCTTTCAGCTCCAATTTTGTGCAGTACCTCTCTGCTTCCAGAATCACCAAAATACACTGGAAGATCAAGTGCACGCCCAGCTGCAACCCGATCACTTCCAGCATCAAGTGCAACAAA…
circ_000725	chr10	34813747	34813886	-	Zm00001eb411380	34813747-34813886,	1	exon	140	CC-AT	ATTTACTTCCTTTTCCTACGGAACTGGGGTCTTTGCCCCAGGGCGGTGCTCACCTGGACTAGACTGTGCCTACCCAACTGGGAATTCACTCGTCGAGCCTTACACTGCTGGCCATAACATTCTCCTAGCCCACGCTGAGG
circ_000726	chr10	10483245	10483317	+	Zm00001eb408250	10483245-10483317,	1	exon	73	GA-GA	TCGTAACAGGGTGATCATCGTTATATTTCATATGAACATTATGATGTTTACATGGGCTAGTTTCTCTCCTTTC
circ_000727	chr10	12862127	12864968	-	Zm00001eb408630	12862127-12862132,12863208-12863250,12863389-12863501,12864836-12864968,	4	exon	295	TG-TG	CATTCTCTGAGGGATGTACTTGATTGCTGTCATGCCAACTTGTATTGAATTGAATACATCAATAAGCCAAAGCCAGTCACTTTTTGGCCAAGCAATAATGAGGCAAACAAGAGCGGCGATCCAGACAATAGCAGAAATTGATATGCAAACTTTGGAGACTTTCTCTTTATCACCATATTTGTCATGATACTGTTGCTGGATGAATGGGCTGAAGAAGAGAGCAGCATTGTATATGAGGTAGGACGAGTGCTTTGTCAAGTTCAACACCAGAAAATCGAAATTCAGGCCCACAACA
circ_000728	chr10	118634921	118635316	+	Zm00001eb422400	118634921-118635069,118635182-118635316,	2	exon	284	TT-AG	CTGTTCCACCACCGCAAGGCAGAGGAGGAGGAAGGCGCCTCCGGCGAGGTCGACTACGAGAAGAAGGAGAAGCACCACAAGCACATGGAGCAGCTCGGCCAGCTCGGCGCCATCGCCGCCGGCGCGTACGCTCTGCACGAGAAGCACAAGGCCAAGAAGGACCCGGAGAACGAGCACGGCCACCGGGTCAAGGAGGAGGTGGCCGCCGTCGCCGCCGTGGGCTCCGCCGGGTTCGCCTTCCACGAGCATCACGAGAAGAAGGACGCCAAGAAGCACGCCCACAA
circ_000729	chr10	90959668	90962165	-	Zm00001eb417890	90959668-90959673,90961054-90961142,90962055-90962165,	3	exon	206	GA-AG	CTGTCACTTTGTCCAATGGAAGTATCAGCATCCTGATCTCCATTTTCTGCAGCATCTTCATCTTCATCTCCTTCACCAGCATCAAGAAAAAATTTATCTTCTTCGGCTATAGCTTCACCAGGAACTATGAGTGGTACAGGTGTTGGCCCCAGCTCTTTCATGTACTCTTTGCGTTTTTCATCTGCTACAGCTTGAGCAAGAGAATC
circ_000730	chr10	1768311	1768460	-	Zm00001eb405350	1768311-1768460,	1	intron	150	GT-GG	CCACTACCCATTATGGATACAAAATTACGCCATACTCATACCCACCATGGGTAGCGGGTATCTATACAACTATACCTGCTAACATCACAATAGACATGATCATTTCAATCGCAAAGTAAGTACCAAATAAAAAAGGATGAAACCCCATAC
circ_000731	chr10	1066413	1081368	+	Zm00001eb404990	1066413-1066502,1066601-1066680,1081282-1081368,	3	exon	257	GG-AG	CTATCGATGATCTTTAAACGTCCTCCAGGTAGCCACAGACCTATGTCTCCAGTGTGCAACCAACCATCTTCATCAATGACTTCTTTTACATCGGAGGGGTAAAACTTAATGTTTAGGCTTGATCCTGCTACATTTGCAATTAAGTTCCCATGAGAAAGAACAGCTCCCTTCGGTGTGCCAGTAGTGCCACTAGTGTAACAGATAGTGGCAACATCTTCAGGTTTTGGAAGACAAAAAGGTTGAGGACTAGCCTTTCC
circ_000732	chr10	34811951	34813423	+	Zm00001eb411380	34811951-34812020,34812153-34812211,34813132-34813209,34813327-34813423,	4	exon	304	AT-GT	ACAATGCTCTTATGACTCTTATCTAGGAAGCCGCCGTACTTCTCTTCTAGTGCTTGAGGTACATCCCAGTGGAAAATTGTTACATATGGCTCTATGCCGTTTTCCAGCAACAAGTTGATGAGGTTTCTGTAGTACTTGATGCCATCCGGGTTAATACCTCCTTCTTTGGTTCCCTTTTGTACATATGGTACGAATTCGCTCCAATGTCTGAATTGCTCCCGTCCAGTATCCTTTCCGGATGATTGTGGCAGAAGTGATCCCAGTTGCTTTCCCCCTTTCCATCTTCATTCCAAGCACCTTCAAT
circ_000733	chr10	90961124	90962837	-	Zm00001eb417890	90961124-90961142,90962055-90962165,90962354-90962434,90962621-90962837,	4	exon	428	GA-TG	CAGCATCAAGAAAAAATTTATCTTCTTCGGCTATAGCTTCACCAGGAACTATGAGTGGTACAGGTGTTGGCCCCAGCTCTTTCATGTACTCTTTGCGTTTTTCATCTGCTACAGCTTGAGCAAGAGAATCTTGATGCGCTTCGAATGGGGGATTAAATGAACATCCTGCAGGCTCAACTTCAACAGCAGGAATAACTGATATAGTAGATCTCTTTTTGGCCTTGGAATCACCTTTACCATCCACAGCCCAGATGTCAAAGTTCTTAACTACAGAATCATTTTCCTGTGGGGAAAAATAAACAATCACGTCACTTAGCAAGCAGCACAAATAAACTGAAAACAAGACACTCATTTTATATGGCAGATACCATAGGAACACTTTTCTCTCCCTGTGTCTCC…
circ_000734	chr10	81059576	81059728	+	Zm00001eb416050	81059576-81059728,	1	exon	153	CC-AG	CTGTAGCTTGGAGAAGTCTGGCTGTATGGACTCATCCTGGGGCTGCTTGGAGAGTATGCATGTGAAGGGCTGTACTTGGCTGATGAAGGATTGTAGCTCGGAGATGTAGGACTGTAGCTCGGAGATGTAGGGCTGTAGCTCGGTGACGTTGGG
circ_000735	chr10	103127127	103127591	+	Zm00001eb419780	103127127-103127207,103127336-103127591,	2	exon	337	GC-AG	CTGCACAGAATTCACGCCAAAAACGGCAACATCTTGGACCACGTCCCAATCAACATAGTTTCCAGTTTCCACCATTGAACATTTATAGACATGAGTCAGTTCCTAATGTACAGTCAATCATTCACCAACTTTCGTCCCAAAGTTCTCAGCCAAGAATTCGTCAAGAAGACCATAATTTGGAATAGTTTCTGAACTGAAGTTGTCAGCTGGCAACTTCCGGATGCATGCAAGAATATGCTGAACATCTCGGCATAATCTATCCTTTGCCTGAGGAGTACTGACTTCCAATTTTGTAAATGCTTCTGTAATATGTGAATGAAATATTTGAACCACTTGC
circ_000736	chr10	142644774	142644890	-	Zm00001eb430100	142644774-142644890,	1	exon	117	AA-GG	CCCCATGGTCTCGAGCGGGACGTCAACGACGGCGTCGCCCCTGCTAGCGCCGCCGAACCCGACGGGCTCAGTCGGCCGGAAGCCGTACTGCTGCTTGCCGCCTCCGGCTCCTCCATT
circ_000737	chr10	92610589	92612011	+	Zm00001eb418180	92610589-92610741,92612006-92612011,	2	exon	159	AG-AG	CTCAAGCAGCGTTTGGGCGGGGCCGAAGAGGCCGGCGTCGAGGAGCGCCGCCATGGACTCCCGCGCCGCATCCATGCCCGGCGGCGAGCTCTGCCGAGGGAATTTGAAACCGGAGCTCGTGCGGGGATTTTGGTTTTCGATGGGTTGGTTTGATTTGCT
circ_000738	chr10	108410403	108411314	-	Zm00001eb420550	108410403-108410513,108410704-108410870,108410983-108411157,108411222-108411314,	4	exon	546	AC-AG	CTTTATGGAGATTGGAATCATTATGGAGCACAACAGCTCAAAGCGTAACGGGATAATCAAGAAATCATACCATGGGCCCTCTACCTCCATAGGATACATAAGATACCATTGCTTAAGCCCCTGAGTGTCCTTCCAAGTATTCCCAAAATAACCCAGAACAAGTACAACAACAACTTGGAACATGAATATTGCAATAGTGAGCTTGTCTATTATTACATCAGCAGCAGTGAACTTGGGCTCCGCAGCTCCCCTACTTATTCCAGATTTTGTTTCATTGCCTGTGTAAACTGCAACTCCACAAGCCCATTCAGTGTATCGAAGGTAACATGACTGAAGAAGTGTATTGTTGATAGTCAAAGGACTTTTTTCATTGTCAATTATAGGGAGGAACAAGCGCAT…
circ_000739	chr10	75760361	75760658	-	n/a	75760361-75760658,	1	intergenic	298	GT-GG	CCTTGCGATATGTAAAGCCACCCATAAGTTGTCACACCCGGATTTAAGGGATACAGCTGGGTGTGTCTCATATGTGCGCCAAGGAAGAACAACACATATAATAACAGAGTGCATAGAGATAAATGTCATAAATATCATAAATGTACTTATTACATAGCGAAAGTCTTACAAAATAAATAATAAATATAAAACGAACTAAATATTATTTCCCAAGCGCCACAAAGCTGACTGGGAGACGCCACCTAGATCAAGTCAAACTCCTTGTTGTGCGGCTCCTCTTCGACCACCTGCTCTTCAC
circ_000740	chr10	146173549	146173681	+	n/a	146173549-146173681,	1	intergenic	133	TG-AG	CTTTGGAGGGGTAGGGAAGCGGCGAGAGGCGACATGGGACTCCGCCGGATCCGACGCGACGGTGGCGCCGCGCCTAACGCCTTTTGTTGGGGCAGTCGCGGGAGATGTGGCCCTCCTGGCCGCAGTTGTAGCA
circ_000741	chr10	98446495	98447926	-	Zm00001eb419130	98446495-98446637,98446722-98446837,98447921-98447926,	3	exon	265	AG-GA	TCTTTTGTTGCACATGACAATGAAGCACCACATGTGAGCAGCATTTTCTGAAACTCTTCTGCACCAGTATCCATATGCTGAAATCTAAACTTCTCAGCTCTTCTTGCATCCATGAGCTTCACATCATCAGTCACATGTTCAGTCAAATATTTGAAGCAAGGAGGACCACCAAAATATTCTTTATAATTTTTCCTTTGATGTTGGAAAGGATAACGTACAGATAGCATTGTCCTACAGGGACTGATCTGCATTGGTGGCAAGTGCT
circ_000742	chr10	109016379	109016764	+	Zm00001eb420640	109016379-109016764,	1	exon	386	GT-AA	TTGTTAAGGAGGTCACCATGTCTGTTCTCTTCAGCTGTCCATGCCCTTGTCCAAACCGCCCACGTGGTTGGACTTGCACCAGTTTCATCCCGGACTCCATCAAGAGTGTTAAGCATTGTTTGGTATGTAGGTAAGGCTTCCTCAGTAACCATATCACCAACTAAGCAAACAAAGTATTCATCAGGTATTTCATTTGCCCGCTCCCTCAGTTCTTTAACTTCATCATAAAACCCATCAGAAGAAGGCTCTGGTAGGAAGTCCTGTGGCTGCCATGACTTTTCAACTGGCTTCAGTAGGTTCAGTAGGTTATCCTTGGCCCAAGGTTGAAGTGAATCGAAAATCTCCCGCTTTTGAGGTGGTAGTGAATGGGTAATTTGGCGATGTAC
circ_000743	chr10	19270350	19270648	+	Zm00001eb409690	19270350-19270648,	1	exon	299	GT-TG	CACGCCTTCTCCGACTACCCGCTCCTGGACAACGCCGTCGGCTTCGTGCTCCACTCCGCGCTGCTCACGCCCTTCTTCGCCTGGAAGTACAGCCACCGGCGCCACCACGCCAACACCGGCTCCATGGAGAACGACGAGGTGTACGTGGCCAAGACCCGGGACGCGCTGCGGTGGTACACGCCGCTCGTGTTCGGCAACCCGGTCGGCCGGCTGGTGTACATCGCGCTGCAGCTCACCCTCGCGTGGCCGCTCTACCTGGCGTTCAACCTCTCAGGGCAGAACTACGGCGGCCGCTTCAC
circ_000744	chr10	113261609	113261825	+	Zm00001eb421310	113261609-113261825,	1	intron	217	GA-AG	CTTCAAACTTCTTGAGCAAGGAAACATGGAAAACGTCATGGATCCGGGTTTGTGGAGGTAGCTGTAGCTTGTAAGACACTTCTCCCACCCTGCTAATAATCTGATATGGATCATAATACCGAGGACCAAGCTTGGATGGTGCTGCAGTAGTGACACCCACAGCTTAACGCTGCTGTAATTTCAACCAAACCCAATCACCCACGCTGAAATGGACATC
circ_000745	chr10	16633358	16633696	-	Zm00001eb409280	16633358-16633696,	1	exon	339	AT-AG	CTCCTGCTCTGCACTATCGAAATCCTTATCACCGTTCTCTTTATCATGCACCTCCAAACCTTCCTCAAATTCTTCAGCTAACTCTTCTGCAGCATCTGAAAATGCACTCTCATCATCTGACTCCTGTGTAGGCTTAAAATCAAACCCCACATCAACTTCATTCCAATCACCTTCCCCCTCCTCTGCCTCTTTCAAAGACTCCTCCTCCCTAAAGGCCATCCTCAGTTCAGAAACCTTATCCCTATGCTTCTTCGACTGCTCGTGGTTCTTCCACTGTTTGTCCGATTTGAACTTTTTATTGCACGCCACACAGTACAGCTCCTCCTTCTTGGCCCTCAT
circ_000746	chr10	107119402	107119525	+	n/a	107119402-107119525,	1	intergenic	124	GT-GG	CCTAACTGCATCGACCTCAGCATCCCCCCCACACGTAATTGCCTCGACATGTCTCCTTCATCACTCTGTTGCCTCTCATGTGCTTGAAGCTCCACCAACACAAACCGACCACAACTACGTCGAC
circ_000747	chr1	245051097	245053495	+	n/a	245051097-245051171,245051321-245051430,245053490-245053495,	3	intergenic	191	CA-AA	TTGCTGCTGAATGACGGGCATGTGAAGAATTGCACTTGATGAACTAACATGATTGGCACAATTTGCTACAGCATCAGGATGGCTTGATTTTTTTGAATTATCAGTATAAGGTTGTTCTGATGAACATATCAACTTTCTTTTTTCTGTTGATTTACTTCTGCTGAATGAAGGTTTCATCATACTAACTTGTG
circ_000748	chr1	304118932	304119031	-	Zm00001eb064160	304118932-304119031,	1	exon	100	GT-AG	CTCCCCCCGACTCTCCTCCCCACACCGCCGCCGCTCCCACCGCCCGCAAAAACACCACGCACACGGGCGCGGGCGCGGAGACCGACCACCACGGCACCAC
circ_000749	chr1	101808751	101810740	+	Zm00001eb024600	101808751-101808756,101810362-101810740,	2	exon	385	TT-CA	TGCCAGATGTAAGATTGCTCTGGAATAACAAAATCTTTTAAAGGATTCCCAAGAGCTGAAGATTGATCAGCAAAAGCTTCCTTCTTCAAATCTGGTTTATCCAATTTGTTGTCATAGGGGTATAGATTGTGTGCCATCTGAAGACCACGTGGAGTCGCAGACAATATATCGCCTGAATCTTGAACCACCTCTAAAGTTTTACAGGAATCATCTCCTGTGTTTTCCAAAAGCTTTTGTTGGCAACAAACCACTTTCGGAGCTAAATCATCAGAGGTGCTTTCTCTTGGAACATCTTGTAAATTTGATTCACGAGTCATGGCAGTAGACATTGTGGGAACCACCTCAGCATGCTCATTTGGCGCAATGTTAACATTATTCACAGTAA
circ_000750	chr1	33863013	33864026	+	Zm00001eb010620	33863013-33863174,33864021-33864026,	2	exon	168	GT-CG	CGCAAGGTGTGTACGTCTGGCATGGCAAGGGACCTATCAACTGGCCCTGCTTTCTCTTTTCATGAATGATGTCCTTCCGTTCGAAGGACGCACATGCACAAACAAGACTTAACTGGCCATGGAGAAGCCAATCGCCGTTATCAGCGCAGCTGCTTGTTGATATTCCAC
circ_000751	chr1	112837006	112837190	-	Zm00001eb025760	112837006-112837190,	1	intron	185	TT-AG	CTAAAAATTACAGCACCAGGACCCAAAGCCTCAAGATGTCTAGCACCGGCAAGCCTCCAGTACTCAACTTTATCCAAAAAAATTGTCTATGCCATTAATTGAAGGACTGACACCATCAAAAGAAAATTGGAAACTAAAGTTGTTGTGGGTTACTCTGGAGTCCAATGGTTTTAGACTAAGTAGAA
circ_000752	chr1	19471439	19471615	-	Zm00001eb006720	19471439-19471615,	1	exon	177	GT-TG	CACCACCACGCGCGCGTCCTCGTCCTCGGCGCCCACGTCCCCGTGCTCCTCCGGCGGCTCGTCCCCGCCGCCCCAGTACCGCGCCGCGCTCTCCGCGGACGTCAGCTCCGTCCACGTCGTCGTTGCCGGGTCCTCCTTCGCCGACGTCGCCGCCTTCTCCCAGCCGCTCATGCCGAC
circ_000753	chr1	245055180	245055315	+	n/a	245055180-245055315,	1	intergenic	136	GC-AG	CTTTGCTTTTTATATAGACACAAGGTTGCCCTCGGTGCAACCCTTGCTCAGATGAAGCTGCCGGAGCAGATCTCTAGGAGTTCCAAGACTTCGACGAGTTTGAAGGCTAGGCTAGTGATCTCCCCCAGTCAGTTGC
circ_000754	chr1	34596829	34597114	-	Zm00001eb010810	34596829-34597114,	1	exon	286	GA-AG	CTCCTCCCCCTCGACGCCGACCTCCTCTTCCGCACAGCCTGGTCCGTTGCGCAGCCTGTCGCTCGCGGACTCGGAGCTGCTCCTCGCCCCTGTGATCTCGGCACTCGGCTCGGGCAGCGCCAAGCTCGCCGAGGCCGCGCTGGAGCTCCTTCACAGGCTGATCGCACACTCCTACATCCATGGCGAGGCCGACCCATCTGCTGATCCCTCAGCACAGCTCGTCGCCTCACTCCTGGACGCCGCCTGCAATGCGCTTGGCCTTGATGACGAGCACATTGAGCTCCTC
circ_000755	chr1	5437241	5437917	+	Zm00001eb001870	5437241-5437325,5437401-5437515,5437817-5437917,	3	exon	301	GA-AG	CTCATTGACGAAACACCATTCACTGATAGATGTGTACCTCCATAGAGCCTGTGTAGCTTCAGAATAAAGTCGTACCATTTGAAATCTTGAAGAATAACAACCTTTATTCTCATATCTTGATTATTATGTCCCCAAAAGGCTCTTAAAGCTCCAAATACATAGCATAAGTTACCAAAACTCTTATACATAGAAGCAAAATAACCTGCCTTAGCACTCAAATGGATATCAGCAACATTAACAAAGAAGTGTGGTTCTCTGTTTGGACCCTCCATCACGCCTACGTCTAGTTTTGATTTTACTC
circ_000756	chr1	159647765	159648031	-	n/a	159647765-159648031,	1	intergenic	267	AG-AG	CTTGTCTGAACTAGTGTAATCACTGTGAGACACCAAAAGTCCTTCTTCGCTAGTACGGTGACGAATCCACCAAGGAGGACGACAGTGGACCATGTAAGGACCAGGAAACCTGTCCCCGTCACGGCCATAGATAGGTAGCCTATGAACACCGCATAGTCGTTGATGAACATAACTTCTGGCCATTTCTCGTCAATAAGCCCAAGGCGATGGGAATGACTCCGGGGCTTGGGGTTTTGCTCTTGCTTCACTCCATGGTTCATTATTTCT
circ_000757	chr1	200531294	200531759	+	Zm00001eb037170	200531294-200531759,	1	exon	466	GG-AG	CTATGGATTAGGGGATGATGATGTGCATATGATCGGAATCCCTGTTGGCTGCCACTGTCATATCTTGGTACTCCTATCCCAAATGGAGTCATAGAATATTCAGGAGTTCCTGATACAGGAAGATTACTCAAATGTCTGTGCTCACTGTCATGATTTCTTGACTCGGTAGCATGGAAAACTGGAGCATTGTTCAAATCAGGAGTGACATGTCCTTCCAAGCCAGTTGAGTGCCGATGAAATGAAGTGCTTTCAGCACCAGAATTAGAAGTAGAAGGCACATTAACAGGATGGAGAAAACCACGCAGGGCAAGATATGGGCAAACAAGTGAACTGCTTGCAGCACTTGAGTGATCTCCAGTTGTGTGGTCTTCATAAAAGGGAAATATCAATGCAGTAAAA…
circ_000758	chr1	3268743	3271320	+	Zm00001eb000920	3268743-3268811,3268924-3268992,3271132-3271320,	3	exon	327	AG-AG	CTGCAGAAGATCGAATAGGAGCAGAAAGACTATTTGCAGAAGCACGAGTTGGAAGTGACAGAGGGCCACTAAGATTATTGGCTCTTGAAAGACTATTTGCAGAAGCACGAGTTGGAAGTGACAAAGGACCACTAAGATTATTGGCTCTTCTTGTACCATTCTTTTGTTTATCAGATACAGATTGAACTCCTTATCAATGTCAGTTATTCTACCAGTGTCATCGTCTTCTTTTATTTCAGGTGGATCATCATCACATATCAGTGATGCCTGAGCCTTTAGATCCTCAATATCGAAGTTCCATGCACTGACACCTCGTTGGTACTCACT
circ_000759	chr1	185952639	185952907	+	Zm00001eb033390	185952639-185952704,185952710-185952907,	2	exon	264	AG-AG	CTCCACCTCCACTCTTACCCCAATCCCCTCTCCCTCTCACCCCCCATCGCCTCCCACCTCTCACCTATCCCTCGCCGCCACCTGCCCCCGCTCCTCGCCTCCGCATCGGCCTCTCAAGCGAGCTCTAAGCCGGCGGCGTCGGCGGCATCTGGCGGTGCTAAACCGCTGCCCCTCTTTCTCTCGCTTGCCGCCGGCCTCCCGCTTCCTCGTGCCGCGGCCGGCCGAGGTAACCCCAGAGGCCTGGCAGCTCCTCTCCATCTTCCT
circ_000760	chr1	78317551	78326503	-	Zm00001eb020860	78317551-78317664,78326192-78326251,78326335-78326503,	3	exon	343	GG-TG	CATAAGTGCTTGATTTTTTGGATCAATTTTCTCAAAGAATACTCTCCTGTGCAGCTTTTGTTGTTCTATATGCGGATTTTTTGCCAAAACTTTCCTCATGTCAGCAACTATAGTATCAGCAACTGAAGGAAACGAGGTGGATGGCAAGGGAAGAGAACTCCTCATCTCAGAACTCCTAAATTTGTTCCTTTGGCAAAAGATGTCAGTAGCAGTTACTCTTTGGAACAGCTGAGATGTCAATCCAACTGCCATCTCAACCAAAACTCAAATCCAATGAAATTTACATCCACTGGATGCAGTTTCTTATCAGCCACTGATGTGTAATATGTGCTAGATTGCAACC
circ_000761	chr1	60575309	60575473	-	Zm00001eb017000	60575309-60575473,	1	exon	165	GT-CG	CGCCTCCCTCCACCTCCGCCTCCTTCCCCACCCCCCTTCCGCTTCCGCCCACAACCCTAACCTTAATCCCGTCGCCGCCGTAGCCGCGGACCGACTGGGCCGACTCCCGCACCGCGCCTTCGGCGTTATATTCGGTCCCTGCGTTCTCTCTCTCCGGTTCCCCAC
circ_000762	chr1	305755447	305755615	+	Zm00001eb064690	305755447-305755615,	1	intron	169	GT-AG	CTGCACAAGCCCCAACCAACTGCCGCCACCGCAACCGCCACCGGCCGCCACCGCACCAACTGCCAGCTGCTGAGGCAGATCCGATCGACAGGGTCCAGATCTGGCCCCCGAGCACCGGATCCGACCGCCTGGGCCATGGGCCAGCGACCCAAGCCGCCGTCCCCTACAC
circ_000763	chr1	298801663	298802493	-	Zm00001eb062070	298801663-298801729,298802488-298802493,	2	exon	73	GA-AT	ATCAGCCATTTCAACAGAATTTGTTGCAAAGCGTTCGCTGTTAGATGGCAGAGTGTCAGAAGGTTGCTATTTC
circ_000764	chr1	200091412	200091929	-	Zm00001eb037010	200091412-200091453,200091924-200091929,	2	exon	48	AT-AG	CTGATTAATATATGGCTCCATTTGATGCAATAGTTCATATCCACGAAT
circ_000765	chr1	214460274	214475501	-	Zm00001eb040740,Zm00001eb040750	214460274-214460353,214472940-214473040,214473123-214473248,214475496-214475501,	4	exon	313	GT-CG	CGATGGATTGCATTTCTTCACTAGAGTACTCCGACTTCAGAAGGGAATGCAGCTGTATATGAGCCTCAACTATATTTGTCTTGATAGGTTTGAATAAGATCATCCGAGTAGATGGATTTTGCAAATACAACCTCATCTTGGTCATTACTTTGGGCAAATCTTGTTGAATGGCAGCGGCAACCTTCTGAACTAGCTCAGCAACTTTATCAGGAGAAGCAAAAGCTTGAGTCTTCAAAGGTTTTGCTAGAACTGAATCTAATTTCTGACCCTGGCTACCAGAGGACAATGCAACTTTGACGGCAGTTACACCAAC
circ_000766	chr1	1226286	1226568	+	Zm00001eb000330	1226286-1226568,	1	exon	283	GG-AG	CTCATCCTCTCCCTCATCTACCCCACCGGCCCGCTCCTCGCCGCCGCCGCCGCCGCAGACCGCCTCACCCTCATACGTTACGTCTTCCCCTCCGAGCGCCTCCCCGACTGGCTCCGACTCGCCCTCGCGTCTCCCCCCTCCACCGACCTCGCCTCGCCGCTCCTGTCGCGTCGCGTCGCCTCCGAGCTCCACCTCTCCGTCTTCGAGTACTACCTCTTCTGGTTCGCCTACTACCCTGTCTCGTCCGCATCATCTGCCGCCCCGGCCGCATCCGCCTCCAACC
circ_000767	chr1	53916513	53920371	+	Zm00001eb015660	53916513-53916639,53920228-53920371,	2	exon	271	GC-GG	CCTTATTTCATGCCTCGAAGCCTCCGACAAATATGTGTTGACCGATGGGGACAATCGTTCAGAGTACTTTGGGGATGCAGGATGCTCGACATCTGGGCTCCGAGAACTAGCACCAAGTAGCATGTTGTCTCCTGTTTTGTTGTGCTAGTGGAAGATTGTGGTAGAAGAGACGACTTTGTTCCAATCCCATTGATTTTACAATAAGCTCCAGAAAAAACCAAGCCATTGCCAACACATCATCATACACAGGACCAACTCTATAACCTTTCGC
circ_000768	chr1	245051097	245066768	+	n/a	245051097-245051171,245051321-245051430,245066763-245066768,	3	intergenic	191	CA-AG	CTTGGCCTGAATGACGGGCATGTGAAGAATTGCACTTGATGAACTAACATGATTGGCACAATTTGCTACAGCATCAGGATGGCTTGATTTTTTTGAATTATCAGTATAAGGTTGTTCTGATGAACATATCAACTTTCTTTTTTCTGTTGATTTACTTCTGCTGAATGAAGGTTTCATCATACTAACTTGTG
circ_000769	chr1	267649408	267649719	-	Zm00001eb053220	267649408-267649719,	1	exon	312	GT-TG	CAGTTCGACCCCAACACGGAGTCTGGCAAGCGCGGCATCAACAGCTTCTTCAACTGGTACTACTTCACCTTCACGGCCGCCATGATGATCTCCGCCACCGTCATCATCTACGTGCAGAGCAACGTGAGCTGGCCCATCGGGCTGGGCATCCCCACGGCACTCATGTTCCTGGCATGCGTGCTCTTCTTCATGGGCACGCGCCTATACGTGCGGGTGACGCCCGAGGGGAGCCCCTTCACCAGCGTCGTGCAGGTGCTATCAGCCGCGCTCAAGAAGCGGTCGCTGAAGCAGCCCAAGGACCCGAAGCAGGAC
circ_000770	chr1	9560799	9561616	+	Zm00001eb003550	9560799-9560971,9561395-9561616,	2	exon	395	GT-AA	TTGCAAGAAATTTGAACTTTTAGTCCTCTCTGAAGATTGATAGTGTGATACTGTCGCACTTTCTACTTCTGCCACATTGAGAAATTGATAGGAGAAATCAAAAAGCTCGAAGTGCTGCTGCTGTCCCAGTAAGTACATTATCGTACAGCCAGCCCAGGCTACAGAATCACCCAGCATTTCTTGTTTCTTCGAAGGATTGTTAATGCTATCTTCTAAGTAACTATACTGAAGACCGCTAAAAATGCGATAGAAATCCTTTGAAGTAGTAATGTCGATAAAGCCTGTTTTTGGAGTTGCGCTCCATTTGCTATAGTGTCTATCCAGGGCAGCACTTGTGAATGCAAGAGCATACTCCAGCACACTACCAGAGTTGAGGTTTGATTTGTACAGCAGAC
circ_000771	chr1	71101355	71111054	-	Zm00001eb019590	71101355-71101525,71101993-71102093,71111049-71111054,	3	exon	278	GG-AA	TTTATCAAGAGGTATATCCTTTATATGTTGGACTTTCAATTCAATAGATATTTCACTCATGTCAGCCAAGTGACCCTTGGCGATAAGTGTCTCCGGAAGCTTGCCATTGTACCTTCCAGAAACACACAATGGATATTTTGCTGAAATGTCTGGAATATATACAGAATCCACTTCAAAATCTTGAATATGCTTTATGGCATCAATGGAAACATTTGACACTATTGTGCTTGAAGCTTTCTGGAACCATTGAAGCATTCGACCCTCAATTGATCTGAACC
circ_000772	chr1	269868948	269873615	-	Zm00001eb053800	269868948-269869018,269873274-269873320,269873394-269873615,	3	exon	340	GT-TG	CAAGAAGTCCACCGATAACACCAATAATTGCCATAGGAAACAATTCCTGGTATGAGTAATCTTCTTGACCTCTTCCCAACTAATGTCCTGAAAAGGAGGATTCCATGTGTATCCACTCCATTTAAGTAACCTTTGATCTCTGGAATACCAGATCCAGCAGCTGCTGGAGCAAAGTTTGTGACTATATATACAGAAGAGAAGACCAGGGCTAAATTGAAAACTGTGTACACAAAGAATCCCACAAAATACGAGTGCTTTATTATAGCAAATGTCGCAGTATATTTCCATCCAGAGAAGTTCTCAACAGCCAGGTTTATGAATATAGCAGCTAATCCAGTAC
circ_000773	chr1	245051321	245055315	+	n/a	245051321-245051430,245052099-245052174,245055180-245055315,	3	intergenic	322	AA-AG	CTTTGCTTTTTATATAGACACAAGGTTGCCCTCGGTGCAACCCTTGCTCAGATGAAGCTGCCGGAGCAGATCTCTAGGAGTTCCAAGACTTCGACGAGTTTGAAGGCTAGGCTAGTGATCTCCCCCAGTCAGTTGCCTTCTGCAATCCTTCCACCTCCTTTACCGCTGATCTTCAGCAACTCTGCAAGCTTTCTTCCATGATTTTCAGAAACCTGAATGACGGGCATGTGAAGAATTGCACTTGATGAACTAACATGATTGGCACAATTTGCTACAGCATCAGGATGGCTTGATTTTTTTGAATTATCAGTATAAGGTTGTT
circ_000774	chr2	232918447	232918574	+	Zm00001eb114320	232918447-232918574,	1	exon	128	AG-AG	CTTCTACAGAACCAAACCCTAAATAAGACATGATGTTCCCTGCTCTGAAACATTGCGTACGTGATACACAAAGAGAACAATCACAGTCAAACTAGTCCTCGTCCATCCCGCCACCAGGCTGGGCATCT
circ_000775	chr2	194922856	194923818	+	Zm00001eb101880	194922856-194922861,194923524-194923589,194923750-194923818,	3	exon	141	GG-AG	CTTGACCTGCTTCTGAAGATCCTTGATGTAGTCCACAGCCAGATCCAGCATGTCGGCAGTGTTGGTTTGCTTTTCCATGTTGGGCACGAGCTCCTGCAGCTTCCGTATCCGCTCGCTGATCTTCGTCCTCCTCACCGTACC
circ_000776	chr2	1533071	1533239	+	Zm00001eb065900,Zm00001eb065910	1533071-1533239,	1	exon	169	GT-AG	CTCCTCCTCCTTCCTGACCGACCGATGGCGATGGTGTGACGCCGCCGCCCGTCCCCGACACCGCTGCGACCTCAGCATTTCCACACCGTCTCGGTCTGGGTCTGGTCTTCGTCTCCGCCTGCGCCTTCGTTTTGATCCTTAAGCTGAGCTTCCCTTCCCCGAGCGCCAC
circ_000777	chr2	17931167	17932788	+	Zm00001eb073730	17931167-17931172,17932616-17932788,	2	exon	179	GA-AA	TTGAAGAGTGTTGAGTTTCACACATAATTTGGGCACTGCCAAATTGTTCAACTTCATAGCAACCTTTTCTTCAGGAACCGTAGGCTCAATAAGTTTCCTCTTTGCAAATGGATTCATTGATTCTGCATAACGTGTCAAGACTGGAGCACTAGGGAGAAGAGTAGATCCAGGCACCAATC
circ_000778	chr2	229763278	229763479	+	n/a	229763278-229763479,	1	intergenic	202	AA-AG	CTCGCCCCTGCCCCAGCCACAGCTTCCCCTTCGGCCCTGCTGCTGCAAGCACTCAGCCTCTCCTATGGCACACGGTGCTCGTCCAGCCCCTTTCTATTGGTGTTTGCGCCATCTCCCTGGTGCTCAATGAAATGACCATGAGGAGTTTTGTGTTGTGTGCAGCCCCACCTGCGACACCGTCGACCCCCGGTGAGGTTCTGTT
circ_000779	chr2	3070685	3070905	+	Zm00001eb066950	3070685-3070905,	1	exon	221	GC-CC	GGCTCGCTATCGCTGGGCGCGCTCGACGCCGTCCCCACCGACGTGCTCGCCCAGATCCTGCGCCTGCTGGGCCCGCTCGACGCCGCGCGCTCCAGCGCCGTCTGCCGCGCCTGGCGCGTCCTCGCCTCCGACAACGGCCTCTGGGCTTTCTTCCTCCGCCTCGGCCCCGAGCCCTAGGACCTCGTCGTCTTCGCCGAGACGCACCTCGCCGCCGGCCCCGC
circ_000780	chr2	168133815	168133958	-	Zm00001eb095660	168133815-168133958,	1	exon	144	GC-AG	CTCCGCCACCTCGACCTCTCCGGCAACGCGCTCACCGGGACCATCCCGCCCGATCTGCTCCGCGCGCCGGAGCTCCGCGTGCTCTCGCTCGCTGGCAACGGCATTACCGGCGGCCTGCCGGAGCAGGTCGGCCAGCTGCGCAGC
circ_000781	chr2	5974062	5974201	-	Zm00001eb068570	5974062-5974201,	1	exon	140	GT-GG	CCTCCCCCCTCTACCACCACATCGTCCATACTTACTCTCGAGCTCCCCGGCGCAAACCCCGTCGCGCCCAGCCGAAGCCCTAGGATCCTCCACACCCGCGGCGTCATCCACCTCTACCACTCGTCGTCCTCCACTTCCAC
circ_000782	chr2	188992740	188993647	-	Zm00001eb100110	188992740-188992745,188993035-188993140,188993236-188993349,188993435-188993647,	4	exon	439	AT-CT	AGCATACAATTGTGTAGCTTCCAATCAAAAACAATGTTTTTGGATTGAAAGCTTCTGCTTGGATGGCCTCAATGACGAACTGTATTACGATTTCTTGACTTGGGAAATCATACCGTGGATTGCAATAGGTTGTGTCAAGTATTAGAGTGTGGACACAGGAAGACTGCAAAACAGGATTGTTGGCCATCTTGGAAGAAAAACGGAAATCTCCAGTGTGCAAAACAGCCATTTGGAGGCTCAAAGAGAATAATGATTGATCCTGGGCAATGGTTGGCATCAAAACATATCAAATTAACTCCAGCAATATTGAGCTTTTCATTTAGGGTCAATACATGCAATCTATCCCATGGGATACCAATCTTATGATGCACAAGACTCGCTGTAATTGACGAACAGTAT…
circ_000783	chr2	188992740	188993647	-	Zm00001eb100110	188992740-188992745,188993035-188993140,188993236-188993349,188993430-188993647,	4	exon	444	AT-CT	AGCATACAATTGTGTAGCTTCCAATCAAAAACAATGTTTTTGGATTGAAAGCTTCTGCTTGGATGGCCTCAATGACGAACTGTATTACGATTTCTTGACTTGGGAAATCATACCGTGGATTGCAATAGGTTGTGTCAAGTATTAGAGTGTGGACACAGGAAGACTGCAAAACAGGATTGTTGGCCATCTTGGAAGAAAAACGGAAATCTCCAGTGTGCAAAACAGCTTTACCATTTGGAGGCTCAAAGAGAATAATGATTGATCCTGGGCAATGGTTGGCATCAAAACATATCAAATTAACTCCAGCAATATTGAGCTTTTCATTTAGGGTCAATACATGCAATCTATCCCATGGGATACCAATCTTATGATGCACAAGACTCGCTGTAATTGACGAAC…
circ_000784	chr2	82327930	82328777	-	Zm00001eb086340	82327930-82328049,82328663-82328777,	2	exon	235	CT-TG	CATCCCCAGTAAATTGCCAACAATGATTGAGCCAATTGGATCATACATAGCATTTCCTGTCATTTGAACAGCTACCAAAGATGCTGCAGCAATAGCAAGGCCTGTAACAGCAGCACCATCATGAGAATTCCATAAATTTTGAACTCCATGCACAATTGTAGCACCGGAACCCAAGCAAAATATTCCAACTGCAGATATGAGAGACCATACAAATCTTTCCTTAGAATAACCATAG
circ_000785	chr2	168133351	168133466	-	Zm00001eb095660	168133351-168133466,	1	exon	116	GT-TG	CACACCACCTTCCCAACAAATCCGAGCTATTAGCTAAAGCAATACCCGCACCACCATCGCCATTGCCGACCCCTCCTCTTCTTAACCTCCATGCATGCTGCATGCCACGGCTTCAC
circ_000786	chr2	230685992	230686132	-	Zm00001eb113550	230685992-230686132,	1	exon	141	GA-AG	CTCGCCCTCTCTTTCTCCCTCCTCGCCGCCTCCCTCTCCCACCTCATCGTGGCCGCCGTCTCCCACCGCTCGCCCTCCTCCCTCCACCACCACCTCATCCGCCTGCTCCGCCACCCGCTCATCCGCCTCCTCCCGCCGCTC
circ_000787	chr2	221931812	221931993	+	n/a	221931812-221931993,	1	intergenic	182	GT-TG	CATCCACCTCCCCAACCCTTAACCAAAAAGACTGATTACGACAAACAACTAAGAATCTCACAGAACTTCCTATGCTCCACAAAGACCAAAAACCACCAGATTGAGCCACTTCCCTGACTTGACTATCTCTTAAAAAAGTATCACTGCTCAGTAAGTCCATCTCCTTTGGGGTTGCCAGTCAC
circ_000788	chr2	56698046	56698264	+	Zm00001eb083390	56698046-56698264,	1	exon	219	GA-TG	CAGCTCACTACGCACCCCCACCTCATTTTCCTTCACCTCCTGCACACCATACACCTCCACCCCCAGCTCACTACGCCCCGCCACCTTATTTTCCAACTCCTACACACCATACACCTCCAGCTCACTACGCTCCACCGCCTTATTTTCCATCTCCTCCTACACACCATGCACCTCCACCTCCAGCTCACTATGCCCCACCGCCTCGTTTTCCATCTCCTC
circ_000789	chr2	170821366	170821579	-	Zm00001eb096260	170821366-170821579,	1	exon	214	GT-AG	CTCTTCCGCCTCTTCCCACAAATCCCTTCCACAAGCTCAACCCCAATCACAGTCCGATGCCCAGGCGCAGCAGCAGCGGCTGCTGGACCTGGCCGCGGAGCTCGAGGAGGAGCGCCGCCTCCGCCGCGCAGCCGAGGCCTCCCTCGCAGAGGCCGAGCCCCGCGTCGCCCGCTTCAAGGCCTTCGCGCAGGAAGCGCTCCGCAAGCGCGACGAC
circ_000790	chr3	30630784	30642903	-	Zm00001eb126710	30630784-30630908,30631637-30631687,30642898-30642903,	3	exon	182	CT-AT	ATTGTGTCCACAAATCCATCAACAACCATTCTGACTGAAAGTGCAACATTCTTCTTGGAAAAATATGGAATTTGTGGCCCATGAGCAGATGAAGAAACAGAGAGCAAAAAGGCAACGATCGCAACCATGTGTTTTTTAATGAGATCATCACGCTCAAGTTCAGAAATTTCACCAAGCTTGAG
circ_000791	chr3	164893707	164898829	-	Zm00001eb143660,Zm00001eb143670	164893707-164893712,164898761-164898829,	2	exon	75	AA-TT	AAAAGGCTGTTGGTTGAACTTGTCAGTTAGTGCAGAGTTATCTGTGGCCAAAGTTTCTGCTAGCTCTTGAGATTT
circ_000792	chr3	100959403	100977194	+	Zm00001eb133580	100959403-100959687,100977189-100977194,	2	exon	291	GC-TG	CATCATTCATTGAATCATCAAAATCCACTGACGGTTCCAGTAAGAAGTTGTCCGTCTCAACTTTCTGCATATCAGAGAACAAAGCGAGTTCATCATCCTTTGATTTTGCAGGAAGCACATTTCTGAAACTGTTTGTCCTCTTTTGATAAGTCTCCTGTGCAGGAGACCTTGATGTCCTCGGTGAGGGTGACGGTGGCATTTTTTCTGGTTTCTTAAGCCTGGTACCCTTCTTTTAGAGACAGTAGAATGCAGTCAAATTCCATCCAGAACAGATGGAACATATATCATGGC
circ_000793	chr3	200200842	200205143	-	Zm00001eb152410	200200842-200200915,200201047-200201137,200204175-200204276,200205036-200205143,	4	exon	375	GT-AG	CTCTAACAGTACTGCCTCAATTTCTAATGCTGACAGCTTGTAACCGCCAAATTTCATAATGTCGGCATTTGTGCGTCCCAAAATTATGAAGTATCCTTCCTCATCTACAGTTACTGTATCACCTGTCTTGAAGAATCCTCCATCAATGAAAGATTCTGCGGTGACCTCTGGTCTTTTCCAATACTCCTTGAAAAGAGATGGACTTCTAATGCAGAGCTCGCCAACTCCAGTTGTAGTTTCAGCCCCGTCCTCCATAATGATCTTGGCTCCAGTAAATACTGTAATGGCCTCTGTACTTTTACTCGCATCGTTGGGATATGATTCTCGCCATCTCTGCCATATCCCGCTTACACTGAATTTTGGTATAAACTCAAC
circ_000794	chr3	196209311	196209492	+	Zm00001eb151510	196209311-196209492,	1	intron	182	GT-GG	CCGATGTCTATTCCTTGGCTACTCCCCTGACCACAAGGGGTACCGGTGTCTGGACCTCACCTCCCACCGCATCATCATCTCTCGTCATGTCGTCTTTGACGAAGATGTGTTTCCCCTAGCTGGCTCCACCCCACCCACCGATCTTGACTCCCTCCTCGAGTCCGATCCGATTCCTCCTCCAC
circ_000795	chr3	72589690	72589833	-	n/a	72589690-72589833,	1	intergenic	144	GT-GG	CCAGTTCCACTGCACCACGCCGGTTTGGCCAAGTCTTCACGCGTCGACCACACCCCCCAGTGCAGGACCTAGTCACTCCAACCACCCCGGCTGGTCTGAACGGCTCTGCCATCTCGACTGGCAGTGTCGCTGCTTCATCTCCAC
circ_000796	chr3	204829164	204829746	-	Zm00001eb153780	204829164-204829374,204829464-204829582,204829695-204829746,	3	exon	382	GG-AG	CTTATTCTCCGCCGTTTCTTGGCCTCCGGAAATCTCCTCCCCCAAGTTGCAAGCATGGGCGGGTTCAGCCTCAGCGGCGCTACAGGTCTCGCGGCGTACCGCGAGGAAGACGACGAGGAGCTGTTCGAGACGTCGTCTTCGATCTCCGGCGACTCCGACGATGAGGGCCACCAGCTCTCCGATGGAGAGGGGGGCGCCTATGATTTGTCATTCTTTTGTTGTCGTCCTCTCCAGGAAAGGGCTATCCAGATACTACGACGGCAAGTCCCAGTCCTTCGCGTGCATGTCTGAAGTGCGATGCCTGGAAGATCTGCGCAAGAAAGAGACGCCCTGGTGGCTCGGAACAACGGCAAAAACATGCTGTACAGACCTCCCCCAGTCC
circ_000797	chr3	220747699	220747899	+	Zm00001eb158770	220747699-220747899,	1	intron	201	GG-GG	CCGCCTGGCCGCCTCCCCAAGCCACCGCTTGGTCGTCTCCTCGCCTGAAGCCGCTGGCTGTCTCCCCCAGAATCCCCCCGCCTGGCCGCCTCCCCCAAGCCACCGCCTGGTCGTCTCCTCGCCTGAAGCCGCCGCCCGCATGGATCCCGTCGACCAAGGGGCGCCACACCCCAAACAGCGCCGCCGCAGCTCCAAATCCCC
circ_000798	chr3	199436982	199437145	+	Zm00001eb152180	199436982-199437145,	1	exon	164	GT-GA	TCCAAATCCACCGCCCTTCAGCCACGTTTCTCCTCGCATGATGCCTGGAAGTAACTTCCGTGTTAATCCAGCTTCTCTTCCTTTTGTACCCTCTTGTGTTACCCCTGTTTCACAGCTTCCTGGAGGATCAGCACAGCATTCTGAGAAAATGCCACCATCACTAC
circ_000799	chr3	123542041	123542294	+	n/a	123542041-123542294,	1	intergenic	254	GT-AG	CTCGCCCTATCTGCCCCCACACCCTCCCTCGAAAACCTTGGTCACCGCGTCCGATTCCCCTGTCGTCCCTGTGTTGTCCTCCTCCACGCCGGGCACGGCCAACCGATCGGCGGCGGCCAGCGAGCGGGAGGAGAGGCAGGTCACGGCGGCAGCCAGATCCGGTCAGCGCTTCCATGCCCCTGCCCCTGCACTCCCTCTCCAACGTCGCGCGAGCCGCCTCTCCCATCCTCTGCATGTCGCCGCCCTCCCCCCAC
circ_000800	chr3	79607048	79615220	+	Zm00001eb132260	79607048-79607146,79614850-79614969,79615054-79615220,	3	exon	386	GA-GT	ACTGTACCAAGATCAACTTGAAAACGAAGGCCGCTCTCAATGACCATCGTACGAAGGGAACCATTGCCAGCTAAGACTTCAAGTTGCATAGTTCTATAGTTGTTCTGAATAACATCTGTCTTATTGACAACAGTTTGGATTTTTGGCTTGTTTTTATCAAGAACCACCGAAGCAATAAGTTTCTTGTAAGGCATATGCTCATCTCGCAAATTCAAGTGTGCTATATGCCCTATTGTTTCAAAACCTGTAGGAATTATTACACCTTCAGGGAGTAATACCTCTAAAACCTCACTCATTGACCAGTAGGTATAAAATAAAGTTAGATGACATCGTATAAGCTCAAAAGCAGATGACTCATCATGTTGAGTTTCATGGTCTAACACATC
circ_000801	chr3	180345087	180345189	-	Zm00001eb146660	180345087-180345189,	1	intron	103	GT-GG	CCCATGAATATCCTGGACCCAAGACATGTCCGCAGTGCCTTCAACAACTGTCCTCTTACAAGTAATTCGCTTAGGCACTAAGGCCCGACAACCCATCAGCCAC
circ_000802	chr3	143324818	143324907	+	Zm00001eb139250	143324818-143324907,	1	exon	90	AT-GG	CCGGATCAGCAAGTTCATCGTTTAACTTCATTTCTAGGTCAGTCTGGGCCGGAACAGGCTGGTCATTACAATTCTCCTGAGCTAAAACAT
circ_000803	chr3	184312069	184312225	+	n/a	184312069-184312225,	1	intergenic	157	GG-AG	CTCCTCCCACATCCAAATCACACACAGCAGACGCCCCTCCACACGGTTACCATTCCCCCTCCTCTTCCTCGTTGGACACCATTCCTCGCTGCGCAGAACTCACCGCGAGCGTCTTCCTCCGACAAGCCTTCTCCCCAAGTAAGAAATTCTCTACTCC
circ_000804	chr3	176612707	176612886	-	Zm00001eb145790	176612707-176612886,	1	exon	180	GT-AG	CTCTCCAACGCCGCCACCAACTGCCTCACGTTCCTCGCGCTCTCCTCCCGCCGCCTCTCGCCGTCCCCCTCGGCGCCGCCGCTGCTCTCCGCCTCCACGGCGCTGCTCCACCTCTACGACTGCTGGTCCGCGTACAAGTACGTCAACTTCTCCCGCACCATCTCCGACGCCATGGCCTAC
circ_000805	chr3	171055324	171055487	+	Zm00001eb144420	171055324-171055487,	1	exon	164	TC-AG	CTCAGGGTGAAAAGAAGAGGCGGCGGCGGCGGCAATGACGCGCCGCAGCGACGCGCGCCTGAGGAGGGTCGTCATGGAGCCGGCTTCGCCTCCAACCGCTGCAAGTCGCGCGGATGAGGGCGGAGGCGAGAGGTGAGGGGCTAGGGTTTAGGGGTTTTGCGGGA
circ_000806	chr3	227697658	227707446	-	Zm00001eb161030	227697658-227697757,227697829-227697886,227698413-227698528,227707441-227707446,	4	exon	280	GA-TA	TATTACAATCTGTTGGCTCTAGTGTCAAAGGATCTGAAGAAGCTTTATCTCGAAAAAATCGGGTCAATCCTTGGACTACTTCCCCATACTTTGAGTAGCACTTTATATGAGGTCGGAGCCAATATGACATCTGAGATTGATAATTTGGCCACACAAACCTTTCATCACAATAAATAATAGCTCCATAGTCATGGCGATGTCTGATAACACGTCCAACAGCCTGATTGACAGCCCGTGCTGCTTGTTGCACATACCATTCTTCTCCTGTCAACATAATTTC
circ_000807	chr3	33180420	33180599	+	Zm00001eb127160	33180420-33180599,	1	intergenic-genetic	180	GG-AG	CTCCCTCAATTCCTCGGCCATCCGTACGTCTCCGCCTTCGGGGCTTTCTTCTTGGTCTCGTTCCTTGGCTGGACAAAACACCTGTGGCAGCGGCCGCGCTGCTTGCCTCGCCTTGCTCTCGGTTCGTGGGGCATGGCGGCTTCGCCGGCTTGTGCTCCGGGGCTCATCTCCGGCCCCACC
circ_000808	chr4	245472375	245472602	+	n/a	245472375-245472602,	1	intergenic	228	GT-AG	CTCCAGGGTTATGGTCTTGCCAGTCAAGGTCTTCACAAAGATCTGCATACCACCTCGCAAGCGGAGCACCAGGTGGAGGGTGCTCTCCTTCTGGATGTTGTAGTCGGCGAGGGTACGGCCATCCTCCAGCTGCTTGCCAGCAAAGATCAGGCGCTGCTGGTCCGGTGGAATGCCCTCCTTGTCCTGGATCTTGGCTTTGACATTATCGATTGTGTCAGACGACTCCAC
circ_000809	chr4	237840630	237840724	+	Zm00001eb205070	237840630-237840724,	1	exon	95	AC-GT	ACCTGGCTATACCAGCCAACCGCCCACTAGTGCTGCAGCAACTTACCCACCTCAAGGTTCAGCTCCATCTGGATATGGCGCTCCACCATCCCAGT
circ_000810	chr4	25422576	25422799	+	Zm00001eb170540	25422576-25422613,25422692-25422799,	2	exon	146	GG-AG	CTGCAGTCAGCCCTCCCCCTATCAACCCACTTCCAGTGCACAGACCCAAGAGACCTCGCTCTAATGCTGTAGCTTCTCTGCCCGAGTCTTCAGCTCCAACAAAAGAAGCTGCTCCAAAGGTCACATTAGAGACTCAACAACATGCC
circ_000811	chr4	92877007	92877407	+	Zm00001eb180290	92877007-92877127,92877250-92877407,	2	exon	279	GT-AG	CTGCTGCAGTGATATTTGTTTTCTCCATCCAAGGCTTCTGTGGATGTAAAGCGCACAAGTGCTTCATCGAGCGAACTAATGTCACCGTCTATTTCAACAGTAAGATCTAACATGGGCTCACATTGTTCAGAACTAACATGGCACCTTGAACATTTGATCTTAGATCGCAAATAGCCCCCAAATATCAATTGGACAAGAGTTGTTTCTTCCGCTGACCGAAGAACACCTCCTTTTCTAGCTTCCTTCGTGCATACAGATTGCATAGCATCAATTGCATAC
circ_000812	chr4	236137995	236173211	-	Zm00001eb204640	236137995-236138073,236173206-236173211,	2	exon	85	GA-AG	CTCACAATATCATCACTGATTTCAGGAGTAATATTAGTACTTCTCCGTGCTCTATGTGTATTTGATGTTGATGCGCCATATTATC
circ_000813	chr4	201655934	201656137	-	Zm00001eb198720	201655934-201656137,	1	exon	204	GC-AG	CTCCTTTGCCTCCTTCACCACCACCCGCTACACCGCCACCACCACCTCCACTCTCTCCAGCTTCACCACTTCCGCCACCACCTCCCCCACTACCATCTGGACCACCTCCTCAGCCTGCACCACCACCTCTGCCAACCCAGGACCCACCTCTTCCTTCTATTCCGCTGCCTGTTTCTTCATCTCCGTTGTCATTGGGTTATCAGC
circ_000814	chr4	29674598	29674726	+	Zm00001eb171320	29674598-29674726,	1	exon	129	GA-AT	ATCATCACTGTCGTCATCCGACTCATCTTCAGAACTGTCCTCATCGCTGCTGCTCTCTTGCTTGACTGTCTTCGAACCATTTTTCGCAACTGCAGCCAAGGGTTTAGCAGCAGGCTTCTTTGCAGGTTC
circ_000815	chr4	201655907	201656038	-	Zm00001eb198720	201655907-201656038,	1	exon	132	GT-AA	TTCCATCAGATTCACCACCACCTCCACCTCCTTTGCCTCCTTCACCACCACCCGCTACACCGCCACCACCACCTCCACTCTCTCCAGCTTCACCACTTCCGCCACCACCTCCCCCACTACCATCTGGACCAC
circ_000816	chr4	179681394	179682141	-	Zm00001eb192570	179681394-179681475,179681552-179681793,179682136-179682141,	3	exon	330	GT-TG	CAATTCCATCCAAGCTATATCGGATTCATAGTAATCATTTGAAAGGAAAGCATTCGCCTTGGTTCTCAGCAAATTCTTGAGGCTTGGAGAATCAGAGCACGCTGATGCTTTCTCAAGAAGCTCAGCTGCTTTCTCTAGGAATGGTCTATACTCCTTGGAGTATGGAACAATAAAAAGATCATCTTTAGTCTTGGTCTGATCCGATCCATCTGATTGTGTTAATGACGATGAAGACAGAGAGTCATGTCGTTTTATGACGGTGAAAAACCCAGTGGCATCATTTTGTTCTTTATCTGTCAGTTTACTCTTCCAAAGTTCAAACTCCAGGAC
circ_000817	chr4	145508170	145508304	+	Zm00001eb184850	145508170-145508304,	1	exon	135	GT-GT	ACTCTGCAGCTTCAAATCCAGCTCGTCCTCATCGTCCTCAGCATCCTCATCATCAGGCTCTCCATCAGGTTCATTCTCGTCTAGTGGGCCCAGCACATCCAGAGATTTCTTACCAGCCTTCAGAATTTCCTTCAC
circ_000818	chr4	179131971	179135074	-	Zm00001eb192500	179131971-179132062,179132998-179133105,179135069-179135074,	3	exon	206	AC-AG	CTCTAATCTTCCTAGTCAGAAATACATACAGGACCTTAACCTGCTCACTCTGTCTGTTGTATGAGCTGTGTCCTTAGGCTGGACTCCTGGACCTGTAGTGCTGCTGCTGTTGCCAAGAGTTCTCTGTACTCATTGAGTAAGATACTTTCCTTAGCAGCAACAGCTGAAAGTTCCGTAACCAGAGAGTGTGAAGCCTGTAACATAGT
circ_000819	chr4	1361219	1361389	+	Zm00001eb164530	1361219-1361389,	1	exon-intron	171	GA-AG	CTCCGACGACCCAGCCTCCTCCGACGATCTCGTCCTCCCCTTCATCTCGCGGATGCTCATGGAGGAGGACATCGACGACAAGTTCTTCTACCAGTTCCCCGACCACCCCGCGCTCCTCAGCGCCCAGCAGCCGTACGCACAGATCCTCTCCGACGCCACCGCCTCCTCCTC
circ_000820	chr4	236171723	236173211	-	Zm00001eb204640	236171723-236171961,236173206-236173211,	2	exon	245	GA-AG	CTTTGAGCACATAGAGGACTATTTGGTTCAAGAGGAGAATCACAGGAATCATAGTCGGCTGAATCACTTTCTCCAGTTGCAGACATATGGGATGTGACAACAGCTTTGGATGAAAATGGAACTAGTTGTCCTGGAAAACGCATCAGGTCAACTAGAAACTCCGCAGATTTCAGAATGACCACAACAGACATATGTTTGGATGAATTATCATATCCATGAGGTTCTTCATTTGGAATGCCATTATC
circ_000821	chr4	130978690	130978922	+	n/a	130978690-130978922,	1	intergenic	233	GC-AG	CTTCCTCTGTCACACCATCCACTTTGCCTTCGTGCGTCCTCTCCCGACATCTTCAGGCGGTTACCTTCCCTCCATCGCTCCCTCTGCTTACCTTATTTGTCGCACCATCCACTTTGCCTTCGTGCGTCCTCTCCCGACATCTTCAGGTAGTTACCTTCCCTCCATCGCTCCCTTTGCTTACCTTCCTCTGTCGCACCATCCACTTTTCTTACCTTCGTGCGTCCTCTTGTTGC
circ_000822	chr4	192871550	192871774	+	n/a	192871550-192871774,	1	intergenic	225	GT-AG	CTCCCAATTCCCGAAATCACCCCCGACACTCCCCACCCAAGAACCCCTCGTCCCCACCTCGCCATGGGCAGCGCCGCCGCCTCGCCGCCGCCGTCCGGGAAGCTGACGCAGGAAGAGCTGAAGCGCGTGGCGGCGCACCGCGCGGTGGAGTTCGTGGAGCCCGGCATGACGCTGGGCCTGGGCACGGGCTCCACGGCGGCGCACGCGCTGGACCGCCTGGGCGAC
circ_000823	chr4	92855217	92856909	+	Zm00001eb180290	92855217-92855222,92856747-92856909,	2	exon	169	TT-AG	CTAAGAAATTCATGAGCATCTTCTTGTTTACCAGGACCAAAGCTACTGCCAATGTCATTCAAATGAGAGAGTATCCCAGTTGGTGACAAGGCAATCTTGCGCCGTTTGCCCTCCACAATGAGTTTTTCAAATTCACACATGAAGCACCATCCGTTTTGAGAACAAGGAA
circ_000824	chr4	174312800	174312955	-	Zm00001eb190740	174312800-174312955,	1	exon	156	GT-GG	CCGCCCCGAGCCTAATAACCCCCACGCCGACCGGCGTCACGTCATCGCGCTCCGCCGGTGCCCGCCGCTCCCGGCGTCGGCCGTCCTCGCCCCCGAGCTGCTCCACGCCAGGGGTCTCCTCCCGAGGCACTGGTCGCACGCCTCACCGCTCTCCAC
circ_000825	chr4	1583953	1588010	+	Zm00001eb164590,Zm00001eb164600,Zm00001eb164610	1583953-1584038,1588005-1588010,	2	intergenic-genetic	92	CC-TG	CATGGATCATCACGACCATTGTCTGCACCACGGCGATCATTTATATCATCAGGAGTATAGGATCTCCTCCTATCCCTGTTATTTTCTTTAGG
circ_000826	chr4	164418555	164419569	-	Zm00001eb188190	164418555-164418586,164419293-164419569,	2	exon-intron	309	GT-GT	ACCACCCTATGCTCTCTGTCCTCGCCCGCAGGATTGCAGCAGCAGTGAATTTGGGAGCTTGAAGCGTTCATCCGAGACATGGAAAAAGTGATCTGCCGGGCATATCTCCTTCAATGCAAGCGATTCTTTTCGAAAGAAACTCTTGATTGGTGTGTCTTAGCCCGTGGGAACACCCATCTCTCCTCTCTGGTGAACTACACATAGTGGTTATATGCTCCTCTATGCTCCACAACAAGCAGGCTGATGCGATATTTTCCTGAAGTTATTATATTCCAGTCTATGCCAGACATCTACATGTAACTCCACCAC
circ_000827	chr5	214001549	214001717	+	Zm00001eb254060	214001549-214001717,	1	exon	169	GT-CG	CGCCCCATCCACCCCGAAACCCTAGCGGATCGTCGCCATGGCCGCGGCCGCGCTCCTTCGCCGCATCCCCGCCGCGCGGGCCCCGGCCACGGCCTTCATGGCGGCGCGTCCGGTCTCCGATTCCACGGCGGCGCTCACCATCGAGACATCTGTCCCTTTCACCTCCCAC
circ_000828	chr5	42321259	42323913	-	Zm00001eb224450	42321259-42321427,42323908-42323913,	2	exon	175	AT-AG	CTGTTAGAATCAAATGAATCACCAAGATAAAAATGGATAATAGCTCCAATAGGATCACGTGTATCAATAGGCATGTGGCGCCTAACAGTACCAACAAGCCGGCCACATTCTGATACAGCATCCTCATTTGAACCCATAGCTCTCCTACTAGATCGGCCTGATTGTGCAGAAGCAT
circ_000829	chr5	28041340	28041507	-	Zm00001eb221360	28041340-28041507,	1	exon	168	GT-AG	CTGGTATTGTCCCACCTCAACCTTTATGGCCACACCCTCATCCTCCACAACCTACTGGATTTCAGCAGCCTCCCTTCCAGTACTATCCAGCTGGTCCTGTAGGCTCTCTTGGCAGGCCAATAACTGGGGCTTCTGCTGCAACTATGGCCTTTGCCAATGTGCAACCAC
circ_000830	chr5	186254533	186254646	-	Zm00001eb246650	186254533-186254646,	1	exon	114	CA-AG	CTGCGGTGGCTTCTGGAATCATAACTACGAGACTGCCTGGAATCTCTCTCTCTTTCCCTGTCATGGTAGCGATCATGGCTTCTTCTGCGGTCATACTCCCTGTCACGGCTGCTG
circ_000831	chr5	165128377	165128571	+	Zm00001eb241240	165128377-165128571,	1	intron	195	GT-TG	CACCTCCCTCTGTCCTTGCCAGCGAAGTCCGTCCAACCCCGGATCAGAGCCGCCAATGTCGTCTGGCCTTAGATCCACGCCGTCGTTGTCAAACAGTGCATGCCTCTCTGCCGTCCGGATCCACACCCCTCTTTCCCGCGCCGCCAGTGGGGCCATGGCGGCGCCCTCTTGTCCCTCCGGCGGCCGCGTCACGAC
circ_000832	chr5	222808934	222809313	-	Zm00001eb258210	222808934-222808999,222809109-222809313,	2	exon	271	GC-GG	CCAGGACATGCAATCATAAATCGCTAAGATCGAATAGAGACTTCCACCAGGGCAGTTAAGATATATCAGAATATCAGCCTCTTCATCGATGGCAGCAAGTGTTACAAGCTGTGATATCACACGTTGGGCCACCTGGGAGTTAATATATTGGCCAATGAAGATTATACGATTTCCCAGTAGTACAGTTGCGAGATCAAGCGCACCACCAGGAGTCATGATTGCCGGCATTAAAGGTGGATTTTCATTCTCAGATGCCACTATTGTATTTTGC
circ_000833	chr5	190441868	190442014	-	Zm00001eb247610,Zm00001eb247620	190441868-190442014,	1	exon	147	GC-AG	CTCGATCTGGGGGCCCAGCCACTGCGGCGACGTGCGGAGCGCGTACCTGTCCTGCTTGGGCTTCAGCAGCGGGTCCAGCTCGTTCAACTTCTTGGCCTGCTTCATGAAGGAGCTGCCATCCAGGATGTGCTCCATGATGGCCGCGGC
circ_000834	chr5	67916262	67917670	+	Zm00001eb229120	67916262-67916333,67916414-67916618,67917068-67917149,67917228-67917287,67917375-67917427,67917504-67917670,	6	exon	639	CG-AG	CTCTATGAAAAGCTCTTGGACAGGTATCACAAAGGAGTAGTTGCCCACCATCTGAACAAATGCTGCACAAGTCATCACTTTGTCTGTTTGACATCTTTTGACCTTTCAAGAGTGAAATTGACAGCTCATGTAGTGAAACGCCGTTTGACATATATATGTTGTGGTAAGGTTTGCGTCGAGCAGCTCGACCAGCATGACCTTCAAACTGTGAAGGACTAACCACTGTGCTGCAGCAATGACAGTAGATCCCAAGTTCCTTTATATATCCATCCAGTAACCTCTTTCCACCAACATAGTAACCAACATCAGTGCCCTCTGGTAAAATGCCACTCATGAAAACGACCTTATGCATACCCTTATCCTTTTGCATGATTTGCATCTGAATATTCTCTCCTGAGG…
circ_000835	chr5	67916262	67917670	+	Zm00001eb229120	67916262-67916333,67916414-67916618,67917068-67917149,67917228-67917287,67917375-67917427,67917569-67917670,	6	exon	574	CG-AG	CTCTATGAAAAGCTCTTGGACAGGTATCACAAAGGAGTAGTTGCCCACCATCTGAACAAATGCTGCACAAGTCATCACTTTGTCTGTTTGACATCTTTTGACGGTTTGCGTCGAGCAGCTCGACCAGCATGACCTTCAAACTGTGAAGGACTAACCACTGTGCTGCAGCAATGACAGTAGATCCCAAGTTCCTTTATATATCCATCCAGTAACCTCTTTCCACCAACATAGTAACCAACATCAGTGCCCTCTGGTAAAATGCCACTCATGAAAACGACCTTATGCATACCCTTATCCTTTTGCATGATTTGCATCTGAATATTCTCTCCTGAGGTGCTGGGCCTATTGCCTTTCGTATTGCAGGCTCCAACATGTCTAATGTAGCATTTGTACATGCCC…
circ_000836	chr5	96001032	96003568	+	n/a	96001032-96001287,96003563-96003568,	2	intergenic	262	GT-AG	CTTTTGCTTGTCACATCATTCCTCAAGCTCTTTCCCCTTCTAACAGAACCAAGAGCAACCTCCGATGATTCTGAATAGTATAATAAAAAGGTACCAAAAGATCTCGTACAAGCTAGAACTTTGTCAGTCCTGGTCAAATTAGGATGCAGTTTTTTGTACGTGTTCCAGGATATGTCAGAAATAATAGGCTTTGAACCAGATCCTTCCTCTCCAACCGCAAACTTCCCACAATATGTTATCTAATCTCATTTAAAGCCTTGAC
circ_000837	chr5	17042151	17042445	+	Zm00001eb218530	17042151-17042445,	1	exon	295	GT-TG	CACGCTAATAACGAGTTACACTTTGAACCGGGTACACACATTTGTCCCTGCCAACATAAAAAAAACGGAAAGATAACTACGTGCTGGGCAGCCTAGTGCTGCACAGCGCTGTCCTGTCAGGTTAACCACGATTATAATTCTCAAAGCAAATGCGAGGTATTGCCCTAAACACACAAAGCAACAGTCTCCCATCGGAGACCAAGCTCCCTTATGTGCACCTGACAGCAGAGGCACCAGGTTGGATCTGCCCCTTGTCGCAGTTCGCTGCCGTCGGTTCTTGGGGGGCGGTGTTCAC
circ_000838	chr5	33070187	33071066	-	Zm00001eb222430	33070187-33070192,33070998-33071066,	2	exon	75	GT-AT	ATGGAGCATCTTTGATTGCGTGCGAGCAGGGCCAAGGCCATGAAAGTACCCAATGTACCATACCCCGGGAGATAC
circ_000839	chr5	156562965	156563158	-	Zm00001eb239880	156562965-156563158,	1	exon	194	GC-TG	CAGGCACCGGAGATCCGTCCACCCAGTAGGCCGCGCGCCGAAGATCTGTCAGGCGCCGGAGATCCGTTCGTCCGCGGATCCGTCCGCCCGGTAGGCTGCCGCGTCGCGTCCGCCGCCGGCCTCCGCGTCGTCGAAGAAGCAGGCCGCCGCGCCGGTGAAGAAGCAGGCTGCCGCGCTGGTGAAGATCCACCCGC
circ_000840	chr5	216470532	216470764	-	Zm00001eb255160	216470532-216470764,	1	exon	233	GT-TG	CAAAGCCACATCCCATCCATCTCCACGGTGAGGCTTGAGCGATCCGAGCAAAAAAAATCATCCGCGACGCAGCGACGCAGGTTTGTTCTCTGATCTCTCTGGTTCTTCTTTTAGCAGCAGGGACGCACAACACAAGAAAAGGTCCGGTTCAAGAGGCTCTTCTGTTGGGTTTTTTTAGAATCCTCAAGAGAAGCGTGTTCTTGGGTTAGGATTTTTTTCTCACCTCATAACAC
circ_000841	chr5	163893335	163893498	-	Zm00001eb241060	163893335-163893498,	1	intron	164	GT-GG	CCCCTCTCCCAATACAAAGCCTCACACCCTCACCCCTCGGTATTGTGTGGAATTAGATCACACAATTCCAAACTCCAATTCAGTGACATCCACAACAACAACAACAAAGCCTTTTTGTCCCAAGCACGTTGGGTTAGGCTAGAGATGAAACTCCATATGAAAAC
circ_000842	chr5	128996081	128996388	-	n/a	128996081-128996388,	1	intergenic	308	GT-AG	CTCCAGGGCTACTAAAATTTTTCAGTTAATACATTGTGATTTGTGGACCTCCCCTTTGACTAGTGTCTCTGGTCATAAATACTATCTTGCCATTTTAGATTATTATTCCCACTTTCTGTGGACATTCCCTTTGCGCCACAAATCATACACTTTGTCCACCCTCACCGCTTTCTTTGCCTATGTCCGCACTAAGTTTGGAATCACCATTCAGGGTATTCAGTGCGACAACGGCTGTGAGTTCGACAACCTACGTGCCCGCACATTTTTTCCTCGCCCGGCATTCACCTTCGTCTGTCATGCCCCTACAC
circ_000843	chr5	225762712	225763506	+	Zm00001eb259590	225762712-225762821,225763171-225763239,225763326-225763506,	3	exon	360	TG-AC	GTGGTCATCAATCTCAGAATATCCTGTGCATGTGGATCACCAGAACGTTTCTGAATACCGTATTGCTGGCATGATACAACATATGTGAATTTCATATCAGCTATAGCTTTGCATTGAGTCAATAGTGGTGATTCATCAGATTCAGATAACAGGTCAGCTGCTCTAAAACCCTCCATAAGGTCATCATCTCTGGCCATATCAAGGGAAGCCTGAAGGACTAAAGCTTGTCTGTAGTACATCATCCCTCTTACTGGGTAGATTTTTTGCAAATAAAAAAGGATGGAAACTCCGTCCTCATTCTGTTCTGCTAGTGCTTGTGAAGAGAAAAGAACATCTTCTTTATAATAAGGAGTCAAGACA
circ_000844	chr5	183597018	183597191	+	Zm00001eb245950	183597018-183597191,	1	exon	174	AA-AG	CTCCACCACATCCGTGCATTTCAGAATGGTCCCGAGCACAAAGAAGCCAACACCGTCAATTGAAATTTGAAGACAATGCAAAAGCCACTAATGATTCTAGATGGCGCATTCCGATGTATAAAATGCCCTATGCACCACCACCTCCAGCAGTGCCACCCCCAGGCTATGTACCTT
circ_000845	chr5	137991931	137992639	+	Zm00001eb237460	137991931-137992059,137992634-137992639,	2	exon	135	AT-AG	CTTGAGCTCCCTGGGAAATGTTTGACCATTTTACACCATTTGTTTCCATAAACTTGCTGCGCACGGATCAATCTTAGTTCCTCCTGTTGCGACCAAGGCTCTTTGTTTATTGCTGGGTCTAGAAGGTACTTCCAT
circ_000846	chr6	115047488	115047582	+	Zm00001eb277450	115047488-115047582,	1	exon	95	AG-AG	CTTCCCCTTACCTATTCGCCGTCCCTCTCTCCTGCTGCCCTCCCCCCGCCGCCGCCCTACGGCCCACCCCGCCGACGCGCCACCTCCGTATCTCT
circ_000847	chr6	165535453	165535666	+	Zm00001eb290760	165535453-165535666,	1	exon	214	GT-AG	CTCTTGATATCCCCGATTTTCCAAATGAAACTCCACCAAATCTAAGGACAAAATTACCTGAAAGACCACCATCTGCTGGCAGATCACGGCCAGGAATGGCTTTAGGCATAAGATCAACCCCAAATACTGAACCTTCAGCTGCCTCAGCTCCTGTGAAGAAGATCTCTGTGCCTGCTGTGAGCCGAAGTAAATTTTCTGATGCATCATCAAAGAC
circ_000848	chr6	169124195	169124443	+	Zm00001eb292320	169124195-169124368,169124369-169124443,	2	exon	249	AT-AG	CTTGTCTGGTATGACACCGCTGCTGAAACCATGCTTGTTACCCCACACGGCCTGCCCGTTCCGATCATACAGAACCTTGATAGAAGAGATTCCCACTGCGCGCGTCAAGTTGATCTGCCACACGCCAGTGTACACGCCGTCGTCAAATATGGTGCCGCCGCTCCCACCCCAGGGGCCATAGGTCTGAGGGCTGCCGCCCACGGCTGCAGCTCCTGTAGTATCTCCGTAGTAACTGGGGACAGAAACCAT
circ_000849	chr6	162936043	162936319	+	Zm00001eb289700	162936043-162936140,162936219-162936319,	2	exon	199	TG-CG	CGTGTGCACTGGTGTCCATCGTTCGCTTGCAAGCTCATAACCATTGGGATCTTCACCAGGTGGATGAAGAATAGAAATGCAAACACGTCCATCAGGATAAACATTCGGATGCCACATCTCAGAAGTAAATCTTACTGATGGCGGGCTGTTGGGATAGTTCTGGGGGAAGGTCATTATTGCATTGAAGTAGCCTCCATCA
circ_000850	chr6	138883498	138884344	-	Zm00001eb282960	138883498-138883631,138884339-138884344,	2	exon	140	GT-AG	CTTCAGCTCCTCAAGGGTAAATCCTCTCCCAGCCCTCGACTTCATGTTGTACTTGAGAGTCTGGCATTGCACAATGGGGCGAAGAGGGCCAGCAGTTGGGCGTGGGAATATCTTCACAGCCTTCTTTTGACGAGTCTTAC
circ_000851	chr6	77511317	77511438	+	Zm00001eb270000	77511317-77511438,	1	exon-intron	122	GG-TT	AAACCAAGCGCAGCTTCTTCTTGCTTGGGTGTAAGTCTTGTGCGATCGCCATACCATAGGTTAGGTCCCACAACTGCAAAGTGGAAGGTGAGATCAGTTCTGCATGTGCATGGTCTAGTGCC
circ_000852	chr6	172901504	172903702	+	Zm00001eb294110	172901504-172901509,172902393-172902596,172903646-172903702,	3	exon	267	GC-AG	CTTCCGAGCAAATGCATTTGAAGACAACTTCTCCTTCCAGGAACCAGGTTTAGAACCCCCGAAGTTCTGTTGGGAAAGTTCCGTAGTTGCTTGAATGGAAACATTAGAAAGTCTAACGTTCCTTCCACGGACAAGGGCTTGAAACTTCACAATCAACCATGTGGCACGGAGAGTTGAAACAGCTTGCCTCCTTACAAGATGTCCCCGAATCAGTGCCTGTAGTCTTATGATCCCTTTCAGGGCACGGAATGCTCGGCGTGCCAGAGC
circ_000853	chr6	164321065	164322155	+	Zm00001eb290190	164321065-164321298,164322087-164322155,	2	exon	303	TA-CC	GGGCTCAGATCCATAAGCTCTCTGATATAGTCCTTCCACATCTCATGCATTGGCTTATAGAGGTCGTACCTTTATGAGAAGGTTGGGCATATGTTCGTCGAGGAGTGATTTCTGGACCTTTGCTTCCCCTTGGTGCATCACATTTAGGCTTAGGGGTATTAAAATTGCTCTTCTTCTGACTCTTAACCTGTTCATCTTGCAATTTCTTAGCTTTTGCAGCAGTATACTGTTGCTGAAGGGCTTCCAAGGTGCGTTTCTTCTGATCAGAGATAGCCGACATTGATCCTTTAGGAAGCCAGTATA
circ_000854	chr6	5630310	5632688	-	Zm00001eb259900	5630310-5630411,5632339-5632431,5632622-5632688,	3	exon	262	TT-AG	CTGGTAGACATTTAGAGTTGCTTTCGTCGCATCATAGAAAGTGAACATGCCATCAAGCGCATCACTTTGAACACGCACATCAGTAGTGTGTGCAGACAGTTCAGGTACAGCACCGAAGGTGTCATAGTTTGCAACTATGGCAATAGTCGGAAGCTGTTCGCTATCACCCTCTCCTTTAAATCCAGGTAACCATCCCTGGATATTAGAAATGGTTGGAGATGACACTTTTCTAGGCTCTGCTGAGGATACGACAAGTTTGTAA
circ_000855	chr7	171989623	171989766	+	Zm00001eb326610	171989623-171989766,	1	exon	144	GA-TG	CACCACCACCACCATCAATGTCACGTTCTGCTCATCCGCCACACCCCCCGCCACCACCATCATTGTATTCTAATGTCCCATTGCCTCCTCTTTCATGCACACTTTCTAGTCCACCTCCGCCCCCGCCGCCGCCACCACCTCCTC
circ_000856	chr7	95125170	95125451	-	Zm00001eb310060	95125170-95125451,	1	intron	282	GT-AG	CTCCCAACTTCTCAGTTTTGACACCAGGATAAATATACTTCATGGAGGTCATCAAGCCTCTGCTAATGTTGTTGGTCGAGGGCATGGAAATAACCGCGACTGTGGCCATGGTTGAGGCAGAGGGCGTGGTGGTCTTGGTGGCCGTGGTGGCTACCAAGGTCCATTGTCATCTTCGTCTGATGGACGTCCACAATCTCGACACACTGATAAGATATGTCAAGTCAACGACAAGGTAGGGCATATTACCCTCAACTGCTAGTACCGCTACGATGAGAGTTACAC
circ_000857	chr7	108816402	108816605	-	Zm00001eb311620	108816402-108816605,	1	exon	204	GT-GG	CCGTCCCGCTTCTTCGCGCCGCCGCTCCTCGCCGCGCCGCTCCCCACCAACTCCTTCTTCCAGAACTTCGTGCTCAAGAACGGGGACCAGCCGGAGTACGTCCACCCGTACTCCGTCCGCTCCCCCGGAGGCGCCGCTCTCGACATCTGCTACCCTTCGCGGAACCACTCGCCGTCCTTCGTCATCCAGACCTTCGTCCCCGAC
circ_000858-A	chr7	179399458	179429257	+	Zm00001eb329290,Zm00001eb329300,Zm00001eb329310	179399458-179399696,179429252-179429257,	2	intergenic-genetic	245	GG-AG	CTCTCACTGGGCACATATCAGGGCAAAGCCCAACAATTGCAGCCAAAGCTGTGGAATCCATGTCAACCAAAGTATTGTCATCGGTGTCATCATTTGTTCTCAAAGGAGTTCTTCCCACTGATGTGGCTTGTTTGGACTTATCTGCAGAGCTTTTAACTGTTTTCACAAAATCATTAGTATTTTCTACTGGCCTGCTTAATTCAACATGGAAACGAGCCAGACGCTTGGCTTTTGCTTGTTCCTCC
circ_000858-B	chr7	179399458	179454239	+	Zm00001eb329290,Zm00001eb329300,Zm00001eb329310,Zm00001eb329320,Zm00001eb329330	179399458-179399696,179454234-179454239,	2	intergenic-genetic	245	GG-AG	CTCTCACTGGGCACATATCAGGGCAAAGCCCAACAATTGCAGCCAAAGCTGTGGAATCCATGTCAACCAAAGTATTGTCATCGGTGTCATCATTTGTTCTCAAAGGAGTTCTTCCCACTGATGTGGCTTGTTTGGACTTATCTGCAGAGCTTTTAACTGTTTTCACAAAATCATTAGTATTTTCTACTGGCCTGCTTAATTCAACATGGAAACGAGCCAGACGCTTGGCTTTTGCTTGTTCCTCC
circ_000859	chr7	38167093	38167243	+	Zm00001eb306040	38167093-38167243,	1	exon	151	GT-AG	CTTAACCTCCCCACCACAAGCCCGCACACACCATCCCGCTCCGCTCAAGTCGCCTCCGCATTCCTGCCCCCTCTACCCGCCCGCCGCCGCGCGGACGACGGGAGACGCCGGCACCATGCTCTGCCTCTCGCTGTGCGCACCGCACCTTCAC
circ_000860	chr7	32436888	32436998	-	Zm00001eb305320	32436888-32436998,	1	exon	111	GA-GT	ACCAGACGGCCTCCTCGAGCTCACCAACGACACGGTCAATCTAGGCCACGCGTTCTACCCTACTCCACTGAGCTTCAACACGCAGCAGCGGCCTAACGGCACTGTGCGATC
circ_000861	chr7	2045661	2047143	-	Zm00001eb298610	2045661-2045666,2046759-2046862,2046975-2047143,	3	exon	279	AT-AG	CTCTAGCTTAATATTATTCAACGAGTCGACAATAATTATGCTGTCGCGTGACACAGACCTGTCAACTTCTGATCTAAGAAGCCCTCTCAAGTTTTTCTCCACAACCATATCTTTGTAGCTATCGTTGCGCCTGAGATGGAGGGATGACTCATCGATGATTCGGACTGTAAGGTCAGGCGAGGAGGAGTGCAGCGCCACAGCAAGGCAAGCGGCGGCTGCTGTTTTACCGCTGCACGGCTGCCCACACATCACGACGAGCGCCATGGACGACGTGGAAAT
circ_000862	chr7	27898828	27901169	-	Zm00001eb304620	27898828-27898867,27900972-27901169,	2	exon	238	GT-GG	CCCCGACACACCCGCCGTGCCCGCCCATCGCGTCATCCTTGCCAGCAGATCTCCTGTTTTCAGAGCGATGCTTGAGAATGAGATGGAAGAGAGTAGGAGTGGCGTCATCAAGATCTATGATGTGTCTTATGACATCCTTCGTGCTTTTGTCCATTACATGTACACTGCAGAAGCTCTTCTAGACGAACAGATGGCATCTGACCTCTTGGTGTTGGCTGAGAAGTACGAAGTAAAGCAC
circ_000863	chr7	42532623	42532778	+	Zm00001eb306370	42532623-42532778,	1	exon	156	AC-AG	CTTCTTGTGGAAAACAGGCTTTGTCTGACCACCATATCCAGACTGTTTGCGGTCATAACGTCGCTTCCCTTGAGCTGAAAGGCTATCCTTACCTTTCTTGTACTGGGTAACCTTGTGCAGGGTGTGCTTCCTGCATTCCTTGTTCTTACAGTAGGT
circ_000864	chr7	31531651	31541887	+	Zm00001eb305180	31531651-31531656,31541603-31541704,31541796-31541887,	3	exon	200	TG-AG	CTCATCTGGCTTCTTAGCAGCAAGTAATGAATTTGTCAGTCCACGGAGAACTTCAAAATCAATATTATCTGATGACTGTTTCAATTGTTAGTAGATAAAGCACTTCTGTATGATGATGAACTCCCTTCATAATCCTTGAGTTCAAACTTTACTTCACCAAGCAAACGGTATGCTTCTGCTTTATCAGGGATTACACCTCA
circ_000865	chr7	155006225	155006612	+	Zm00001eb321400	155006225-155006271,155006347-155006447,155006575-155006612,	3	exon	186	CG-AG	CTAAATAGTGAATGCATAGGGTGTCCTGACCATCATATCCAATGAAGTAAAACAGCAACAGGTGAATGCAGGGGAAGGGATCTCCACTGATAATATGCTTCCCAGCTTGCCAGGGCCGAAGACACAGGATTTTTAGGCTCTGCACAAGGGCAGAGGGAGCTTTGCAAGTTCCATTCAGCTTCTACG
circ_000866	chr7	53295225	53295832	-	Zm00001eb307440	53295225-53295304,53295387-53295645,53295722-53295832,	3	exon	450	CT-AG	CTGTTATTGAAGATAACAGATCGTTGCAGTCCAAATGTTCATCATCGCACAGCGAATCTAATATCTGTACACCCATATCGCTCCGGAAGTTCAACTGATGGATGCCCATAATAACAAGCATCTGTGGTAAAAGGGCACCATACTTGATTCACAAGTTATGGACATTTATTTGGTGGATTTGTTTAGGAATGCTATATTACCTCATCAAGATGCATGGCAACTGCTCTAAGAACAAAACTAGCACTGACGTGATCAAGGTAAGAAATGGGACAAAGAAGCGCAGCAGAGCTTATCATCTTTACTGTTTCAGGCATTGTAAACGCAGCCAAACCCATGATACTGTGAATGTCCCACATACAAAATTTTGGACTGTGCAACTGTATATACATAGCTTAACAT…
circ_000867	chr7	177794514	177794840	-	Zm00001eb328760	177794514-177794840,	1	exon	327	GT-TC	GATGCCGAGCTGGTCCCCGGACGGGAGTCTGATCGCGTTCTCGTCGAACCGTCACGACCCGGCGAACCCGGCCGTGTTCAGCATCTACCTGGTGCGGCCCGACGGCTCCGGGCTGCGCCGCGTGTACGTGGCCGGGGCGGAGGGCAGCGCGGAGGCGGACAAGGAGCGGATCAACCACGTGTGCTTCAGCCCGGACTCGCAGTGGCTGCTGTTCACGGCCAACCTGGGCAGCGTCGTGGCGGAGCCCATCTCGGGGCCCAACCAGTTCCAGCCGTACGGGGACCTGTACGTGTGCCGCCTCGACGGATCGGACCTGCGCCGCCTCAC
circ_000868	chr7	183798707	183800683	+	Zm00001eb331590	183798707-183798787,183798891-183798938,183799910-183799984,183800275-183800370,183800452-183800532,183800612-183800683,	6	exon	453	GT-TG	CAATGCAGGAAAAACACCTATTGCTTGCATGACAGTCCTCATGAATAGCAAAGGAAGAGGAATCTGTTCAACCAGTTGATTTAGTGCTTTTGCCAGAACTTGCTGGGTAAATATTGTTCTTTGCTCAAAGCAAGAAGAGCATGCATCCATAACCTTTTTGAGTGGTATTCCTTCCTTATCAGGAGCTATTACATGAATTGCAATTAAAATTTCTGATGGATCAAGTGAAGGGCCATTCCGAGGTGATCCCTGCAAGATTCGGGAAATGGCACTTTGAAACTTGTCTATTGGAAGATTAACAATACTGGGGAACACAGGCAGGACCTCATCTTTTGGTAGATGAACCAAGATTGCAAAAAGGAACTCAACATCCTTTGTTTTAGAATATAAGATCTTTAT…
circ_000869	chr7	179927928	179929535	+	Zm00001eb329590	179927928-179927933,179928541-179928633,179929350-179929535,	3	exon	285	AT-AG	CTGGAGAAGATCAACATAAATCTTCCCACCATCTTCAGATTTCAAGGTGCGGGACCATATTTCAACAGCTTTATCAATATTTCCAGCACAAATATAACAGAGGGTTGCAGCTAGTGTATCTCCGATATTTAGAAGTCTAGACGCAAGCGTGTCACACAAAACATGCCACTCCTCTTTCTGTGCAAACGTGCAAAGCAGAGCAAGAGTTTCCTTCCATGAACTTAGTGGCCAGGTACTTACAAAACTCATTAAATCATTGCCCACCATAGCGGAGACAACTCAGAT
circ_000870	chr8	4425227	4425349	+	Zm00001eb333220	4425227-4425349,	1	exon	123	GC-AG	CTCCTCAGCCACTTCCTCTTGTTAATGTTCCTCGTTTTATCGCTCCACCAGCACCATACTCTGTTCCACCCCCAGGTTCTCATATGCCTGGAGTTCCACACATGATGCCTCACATGCATCTGC
circ_000871	chr8	168770764	168772653	+	Zm00001eb364810	168770764-168770769,168771941-168772071,168772600-168772653,	3	exon	191	AA-GG	CCAACCAGGAGGCAACTCTTGTGCAGATTTGTTCTCGATTTCTTGAGAATCCACAGTCTGCGTACTCGTGTAATTCTTATTTGTAGTCTCATCTTTGAGAATTCCCCTTGCCCTTAACCTCTGCTTTAAAAAATCAGGGAGATCGTTTGCACATTTAGCTTTATCAGTTTCATCTCTAGGTTTATGAACTT
circ_000872	chr8	6858495	6858710	-	Zm00001eb333960,Zm00001eb333970	6858495-6858710,	1	exon	216	GA-AG	CTCTACCTCTCCTGCGACCCCTACATGCGGCCCAAGATGTCGCGCCCGCTGCGGGAGTCCTACACGGCCGCCTTCGTCCCGGGCGACACCATCACAGGCTACGGCGTCGCGCGCGTGGTCGACTCCTCCGACCCGCGCCTCGCGCCCGGGGACCTCGTCTGGGGCATCACCGGCTGGGAGGACTACAGCGTCGTGACGCCGCCCGCCACCAGGCTC
circ_000873	chr8	6459900	6460832	-	Zm00001eb333800	6459900-6459978,6460061-6460123,6460337-6460467,6460827-6460832,	4	exon	279	TT-AG	CTGTTCTTGAGATTGGAAATACATGAATGGAGTATAGTGCAGAAAATTTGAAACCCTTGATGTGTATATATCAGCATATTTTTCAATTTGCCTGGTAAGATGACTCTTATCCCATAGACCAGCACGTGACAACCAACCCCATCTTTTATTGAAAAGTTCTCCATCTGCTTCTAGCATTGGCCCGATCTTTTCATCTAATCTTTGCATAACAATGAGCAACTTTTGCATACTCTCCGTAAGCTCCTGGTCATCCATACAAGTTGCAGCAAGCGTATTAAA
circ_000874	chr8	153859859	153860311	+	Zm00001eb360010	153859859-153859936,153860031-153860311,	2	exon	359	CC-AG	CTCGACTCCCAAGGCTGAACCGGTGTCTCCTTACGTATTGAGGCGCCATCTGGAATAGAAGACGCCGATTTTGATGGTTCTGGTGCATCTGATGGTGAGAAGCCCAGGCCAAACGACGAAAGAAGAGGATCGCTGGAAATGTTTGTAGTCACTGCATTGCTTGATCTGTGGCCATGACCACCCCCTAGAAGAGCCCGTAAATGAGTACCCCGTAGATCTCGGCTCAATGCAGAAATTGCATGGCTCTCGGGAATAATGTATCTGCGAGACCTGTGACCGTTCTTGAACAGGTAACCATGCTGCATGGTCATATGGTTAAGCATATCTCTTGTAACCCTTTGGGAGCAAATGGGGCAGGG
circ_000875	chr8	170177085	170177658	+	Zm00001eb365610	170177085-170177166,170177473-170177544,170177550-170177658,	3	exon	263	TC-TG	CAAGTAGAGTCTGCTGCAGTCTGCACAATGTTGAAGAAGCCCCTTGGCTTTATCAAGAGCCACATGTAGTGAACACAATGCCTGTATACCAGACTTGCTTCTGGGTCTTTTCGATAAAGGGGAAAATGGTGGAAAGTTTAGATACAGAAGGATGAAATGCTCTACAAATTCCTGCGTGCAACTTGGCATCATTAGCCAGAAAAGGACCTTCTTCGGCCTCCATTGCTTCCATGGGTGGCTATTACCTGAGCTCCAACATCTGA
circ_000876	chr8	173982302	173982440	+	Zm00001eb367290	173982302-173982360,173982365-173982440,	2	exon	135	GC-AG	CTCCTCTTCCCCGCAAACCCTAACCCTAGCCACGATCCCGCAGCCTCCGCTCTCGTCAGCCTGCCACTCCTCCGCCCGGCCGCCCACAGGGGAAGATCCGGATCCGCGTCGCCATCCGCGAGCGCTCGCCGCCGC
circ_000877	chr8	6790277	6790428	+	Zm00001eb333940	6790277-6790428,	1	exon	152	CA-AG	CTGGGAAAAGGTTATCAAGAGATATCCGAAAATGCAGAGAAGATCTGATATCGCCATTGCCTGCATGTGGCAGCATACAAGAAACTTAGGCGAAATTGTGCCAGTCAATGTTCACTGCCCAGTGAAAAGCGAACGAGCGCTTTCCTATCTTG
circ_000878	chr9	160783676	160783885	-	Zm00001eb404070	160783676-160783885,	1	exon	210	GT-CA	TGGAAAAATGTGAGAATGAGATTGATTAAGTGGAGCATTTGATGCATCTGCTTCAACTGTTTTTTGCTGATTCACAAACTCCTCCATTTTGATTGTATCAGAGGCTGATGCAGAAGTTGTCGCTGAGTTGTTTACAAGAGGTTCTTTACTGTCAGATCTTGGAGTTGGACCTGGACATTCACGTTCAATATCTTGATTGTCAGAAGGTAC
circ_000879	chr9	104083988	104084351	+	Zm00001eb387780,Zm00001eb387790	104083988-104084351,	1	exon	364	GT-AG	CTCCGCCCTCGCTGCTCTGTCCGCCACCGCGGCCGCCGCCGGTAAGCGCATCCTCCTGTCGCGCCCCGCCTCCTCCTCCTCCCTCTCCTTCGCCTCCCGCCGCCTGGCCGCCGGGGCACCCCTCCGGGGGTTCCTTGGCGCGCCAATCCGGGCCGTGGCGTCGTCGGCGTCGGCGGCCCCCGCGGCGGCGGCCAAGACCATCGCGGTCGGGGACCGGCTCCCTGACGCGACGCTCTCCTACTTCGACACGTCCTCCCCCGACGGCGAGCTGAAGACGGTGACGGTCCGCGACCTCACCGCGGGGAAGAAGGTGGTGCTCTTCGCCGTGCCCGGCGCGTTCACGCCCACCTGCACCCAGAAGCAC
circ_000880	chr9	158706111	158706302	-	Zm00001eb402960	158706111-158706302,	1	exon	192	GC-AG	CTTATTTTTTTCTGCCCTAGTCAAAGCATTGTCCAAAATCTCCTCTCCAAAACCCAACAAGGGTAATCCAGGCCGGGAGTATTTCACAGGTTGGAGATGTTCAAGGGGGCGGAATACAAGTTCACCACCACGAGGTGGCAGATGAAGAGCATGGTAACCACACACAATCTGTAGAGGTTCGTTATTGTGTGC
circ_000881	chr9	125134262	125134390	-	Zm00001eb392330	125134262-125134390,	1	exon	129	GA-AG	CTCCTTGGAAGCCTCAACAACAGAATCAGGGAGGATCACCTCTTTCACATCTTCTGAGTTAAGCTCATTCTTTTGTCCGAGATCATCAGATTTCATATTGGCCTCATCTTGTTTAATTTCCACAACATC
circ_000882	chr9	31474990	31475296	-	Zm00001eb379620	31474990-31475296,	1	exon	307	GT-AG	CTCCTCTCTTCTCCTTCGGCTGGGTTTGGGTTAACAAAGGCAGAGGGACCAGCGGCAGCGAAGGTCAATTGCATCGCATCGGATCAGATCTCGACTCAATTCCCGCGGTTAATCCACATATCGACTCAATTCCCGCGGTTAATCCACCGCCAACACCTAAGTTAAAACCACGGCGGCGGAGGCATCGGCCATGCTGGCGCGTGTGGCTGCGGAGATAGCCGCGCTCCCGGAGCCGCGCGGGCCCATGCGCCGCCTCTGCGGGGACCTCGCGCGCCGCATCCGCCTCCTCGCGCCCCTACTCCAGCAC
circ_000883	chr9	60194660	60197068	-	Zm00001eb382690	60194660-60194665,60195494-60195561,60196599-60196655,60196796-60196895,60197019-60197068,	5	exon	281	TC-TT	AATATTTCTGAATCGGTCTCCTCATCAAGCATACTGAACAGATTCTCTTCAATATTCTCGTCAATCATTGCAGCCGGGTCCCTTTCAATCAGATGGTGCAGTGTCGACACTGCTAAATATCTAAGACTTGGCTGTCTTGAGTAAAGCATTGGGATAAGACCTTGAACGTGCAAGTGCACAGGAACAGCTTGAGGAGCAAAAAGCACAAGCTGCTGGGAGAATCTAACCGATTCTAAAAGTGTAGCCATTTCATTTGATGAACTTATCTCTGCAATAACAGA
circ_000884	chr9	7222552	7222676	+	Zm00001eb372660	7222552-7222676,	1	exon	125	CA-AG	CTCCTCCACCACCTCTCCTTTCTCGTACTCATCATATTCATACCCCTACTCCTCTGTTCTGCCTCAAGATTCGTACTACCTCCCCGCCACATCCTCTTACACCGCGCTCCCGCCACCACCTCTTG
circ_000885	chr9	46705933	46706146	-	Zm00001eb381490	46705933-46706146,	1	exon	214	GA-GG	CCCCACCCTACACAATTGACCCTCAGCACATCTCTCAAAACTACTACTCCACCAAAGCCCCAGCTGCTCCATACAACTACCCTAATTTTCAGTCATATCCAAGTTTTCAGGACAGCACGTCACCTTCTGTCCCGACTGAGCCGACGTATCAATCTTCATTCTATCCTGCAACTGATGGTCCTGCAGCTACTTCGTACACTCCTGCTTCAAATTC
circ_000886	chr9	110303418	110303666	-	Zm00001eb388990	110303418-110303666,	1	exon	249	GT-AG	CTCCAGATCCAGACCAACGTCGTCGACGCCGCGCTGCGCTGCGGCTCCGTCCGCAAGCTCCTCTTCCTCGGCTCCTCCTGCATCTACCCCAAGTTCGCGCCGCAGCCCATCACGGAGGGCGCGCTCCTCTCCGGCCCGCTCGAGCCCACCAACGAGTGGTACGCCGTCGCCAAGATCGCCGGCATCAAGATGTGCCAGGCCTACCGCATCCAGCACGGCCTCGACGCCGTCTCTGCCATGCCCACCAAC
circ_000887	chr9	140150221	140150378	-	Zm00001eb395720	140150221-140150378,	1	exon	158	GT-AG	CTCCTTCTCCAGACTCTAGCTACAGTTTCCAGGCACCTGAGGACAAGGACTTCGCCAAGGAGCCTCCTGTTCTTCCATCTCAACTCCATCTCGGTGTTCTTAACTCACAGAACTCGGAAGAAAGCTGTGCGCGGCCGCAGCACATAGTCCTCAATCAC
circ_000888	chr10	137773973	137774082	+	Zm00001eb428220	137773973-137774082,	1	exon	110	GT-AG	CTTTCTTGAAAAATCACCTTTCGATTTCCTACGCTTCTCCAGTGCCGCTTTCACCTTATCCTTGTTTACCTTCTTCATCGCATCCATCATTGAAGACGACACATTGGGAC
circ_000889	chr10	14895398	14895493	-	Zm00001eb408940	14895398-14895493,	1	exon	96	GT-CG	CGCCGCCGCCACAATTCCCGTTCCCTATGCCACCGCTTCCACACCTGCCTCCTCTCCCGCACTTCCCACCGCTACCGTCACTTTACTCACCGCCAC
circ_000890	chr10	70151698	70151910	+	Zm00001eb414360	70151698-70151910,	1	exon	213	TA-AG	CTACACCATCATCTGGAACCCGACCAACATCCTGTTCAAGGTCGACGACCTCTTCATCCGCTCCTTCAAGCGCTACGCCGACCTGCCGTACCCGAGCTCCAGGCCCATGACGCTGCACGCCACGCTGTGGGACGGCAGCTACTGGGCCACCGAGAAGGGCAGGGTCGGCATCGACTGGTCCGACGCGCCCTTCGTCGTCTCCTACCGCAGCTA
circ_000891	chr10	107150787	107151301	+	Zm00001eb420350	107150787-107150855,107150955-107151102,107151227-107151301,	3	exon	292	GT-AG	CTGTTTTTTACTTTTTAACACAAAAAGTGAGCTTTCAGGAGAGAGCACAGGATCAAAATCGTTTTGAATCTTAAGCAACATGAGCATGGACAAGATGTGGTTCAATGTATTGCTGAAACAGTGGAAACACAGTGGTCATGATTTCAGTCTGAGAAATAGAAAAGCCAGCACGATTCTTGTCTCTCTGTATTCTTGCAATAAGGTGTGAATGAACTCCACCAACAACTGCAATCCACAAATCCAGAAATTTCCTTATAGCAGGATGTAAAGTGTACACACCTTCAAAGATGAC
circ_000892	chr10	109546385	109546593	-	Zm00001eb420710	109546385-109546593,	1	exon	209	GT-CC	GGTGCCGTGGGGGGAAGGGAGCTGTGGCGTGGAGACGGCGGAGGCGCAGACCAGATCGGGCTGTTCAGCCAATCTGGGACGGATTTGCGTCTGGGAGTGTCGCCGTCGTCCATGTCACCGGCGGCGGCACCGCTGGCTGGCGGGGTTTTAGGAGCGGGACTCCGGAGATGGGGCAGCGGCGGTTGGTCTCTGTCTCGGGTGGGGTGGAC
circ_000893	chr10	79588004	79588261	+	n/a	79588004-79588261,	1	intergenic	258	GC-TG	CATAGCCCCTACGGCCCCTCATCCGACCTCCACCACCGACGACAGTTGTCGCCCCTGTAAGGGCGGACGTGGGGGTGGCAGCTCCACCCGTGGAGGTTCCACCGGCCGGGGTGGCGACCAGGGCTAGCCATCGTTCTACAACCCCTAGACCGGCACCTCTCCATGTGGCCGGGTCAGGCCCCCAGTGCCTCCCGTCCTCCGGCTCCAGCGCCGGCTCTCCTGACTGCACCTGCCCTACGACACACCTTCGCCGCCTGC
circ_000894	chr1	233711979	233712099	+	Zm00001eb044830	233711979-233712099,	1	exon	121	AG-AG	CTCCTCCTCCTCGCCCCGCTCCCTTCTCCTCCCCGCCTTTCGCATCTCATCCACACCCGCAGACTCTACGCACTCGCCCCCGCCCGCCGCCCTGCGGCCGCGCGCGCGCGCCGCGAATCCT
circ_000895	chr1	239266530	239266843	-	Zm00001eb046260	239266530-239266843,	1	exon	314	AA-AG	CTCATCCTCGGACTCAGAATCACTATCAGAATCAGAACTGCTACTGGACTCTTCCTTTTTCTTGGCTACTACTTGAGCTTTAGCAGGAATATCCTACAGAAATTGTTTGCGTTACGATTTTTACTAACAAATTATGTTGACAAAGAACAGCTATCAAAGATGCATGAATCAAGAAACAAGTGCAACAAATAAATCCACAAATAAATTACATCTTCTGATTCATCCTCATCAGAATCACTGTCAGAGCTATCAGATTCTTGGGTCTTCTTTTGCACAGAGGCAACAACAGGCTTCTTTAGGCTAGCAGCAGGTTT
circ_000896	chr1	300051659	300056679	-	Zm00001eb062490	300051659-300051705,300051793-300051969,300056674-300056679,	3	exon	230	AT-AG	CTGACTGCAGCTGAATAAACAATAGCCATCCATAGCCCATTGTAAACCACTTGATCATGTGCATGCCATGCACTGAAAATCTCAATTTTGTTGCTAGATGCATTCCATATCCATATTTCTAGTGACCCAGATACTCTTCCAATTGCCAAACTGACCTCGTGTTGAGACTGGGCAGGTATGGCTAATGAGATTGATGACACTGGAGATGATAAATCAGTGGCGACAGAGAT
circ_000897	chr1	225639859	225639990	+	Zm00001eb042760	225639859-225639990,	1	exon	132	AA-AG	CTTCTCATGTTTCTTGGAATGATCACCACCTAAATCATGATTCCCACTCTTGTCCTTTTTCTTTTCTTTGTCTTTGTCCTTATCTTTATCTTTATCTTTACTCCGATCTTTATGCCGATGTTTGTGTTTCTT
circ_000898	chr1	268110201	268111034	+	Zm00001eb053320	268110201-268110260,268110865-268111034,	2	exon	230	GA-AT	ATCTTGGAAAGCCTTAGAATGGATGCTGCAAGCATCAGCATTCATCACTGGAGGGGCAGGGGCAGCAGCAGCAGCTTCTGAGGCAACAGTCTCATGCTGAATGGTCCGGGGACCTAATACAGCATCAACAGCCCTGTGTGCCATGGCACTACCCGTGCCAAACGCCATACCTGGCTGTGGCGGGTTCCTCACTGGAGCAGCACGGGGAGCTGGGCGTGGGGCAGACCTTC
circ_000899	chr1	235202353	235202587	-	Zm00001eb045300	235202353-235202587,	1	exon	235	GC-AG	CTGGATGTTGGCGCCTCCCTCCACGAGGCTTTGGATGTAATTCTGGAAGAACATTACCGGGTCGAAGGGCTCGGGCTCGTTCCTGTGGGTGGCCGTGCCAGGGGCGAAACGTATGCTGGAGCCGCTGATCCTGTTGGGTTGTTCGCCGGGTCCGACGAAGGAGTTGAGGATGGAGGAGATGTAGCGGGGCTCGGACCGAGAGGTCGCAGCGGAGGAGGACGAGAAGGAAGGGGGC
circ_000900	chr1	38215668	38215799	-	Zm00001eb011720	38215668-38215799,	1	exon	132	GG-TG	CACAAACCACGTCCCCGCCGTCGTCGTCGCGCTTCCCCTACGCGCGCCCCGTCGCGTCTCGGTGCTGCTGTTGGGTGCGCCCGCGCGTTGCCGTGAAGGGTGAAGCTGCTTCCGCGCGCCGCCGCCGCCACC
circ_000901	chr1	232951852	232953099	-	Zm00001eb044640	232951852-232951857,232952826-232952909,232953006-232953099,	3	exon	184	AC-AG	CTTAACCAGAGCAGGCCCCGTTGCAAACTTTAGTATTTTTTGGATCTGCTTTTCTTGAAACAGTGGAAGGTTTCTGAAGGAGAGAGAGAGCTGATAGTAACTCAACAATGTTGAGAATGACACCAACAAAAGAAAGTGAGCGGCATTTAGGGCTCAATTTTCGACTCATGCTGAGCAAATGGGT
circ_000902	chr1	185302838	185339883	-	Zm00001eb033280,Zm00001eb033290,Zm00001eb033300	185302838-185303091,185339878-185339883,	2	intergenic-genetic	260	TG-AG	CTGTATTTCTGCCTGTAGTTGTTGAACTTATAGGTTCTTCAGACCATAACACTGAGTAAATATGTTGTTCAACTTGTGTAAGTGTTTGTCCAGTTTGAGGATACCTGTTGAGGATACCTGCAGTGTCTGGCTAAAGCAAGACTAATGTTGCATTCATTTGTGTATTCACCGCTTACTGACACGTGGGGGAAATTGAGCTCCAAGCCTCCAACTGAGATCCCTCAATGCAACAAACAAAAGTTACGGGCTGGAACACAACA
circ_000903	chr1	293527598	293527720	+	Zm00001eb060350	293527598-293527720,	1	exon	123	GT-TG	CACCCTCTCCCCGCCTCCCGCTGCGACCACCGCACCGGCGAACTTGGAGGGCCGCTCGGCGCTGCACACCAAGCCGGGGATGGCCGCCGCGCTTGCGAGCTCGCCGCTTGTTCACCTAACTAC
circ_000904	chr1	51631787	51631989	+	Zm00001eb015150	51631787-51631989,	1	exon	203	GT-AG	CTCCTCCTACTCTCCGCTATTCGTCTTCGCTGATTTCTGCCGCTCCAATTCCATCGCTTCCCTGCTTTAGAACCTTCTCTGCTAGCTTCTCCCCGTCACAGCTTTTGGTGCCTCGTCATCGGCGACCAAACCGCCGGCGACCGGATAAACTAAGCCAGCTCCTTCGCTCCGAAAGTCGTCTCTCGTAGAGAGCACTTGCTCAC
circ_000905	chr1	280474306	280475579	-	Zm00001eb056450	280474306-280474366,280474519-280474592,280475546-280475579,	3	exon	169	AA-AG	CTGTCATGAGCTGCATTGCCTGCAGGACCTTGGTGTCGGGATTCACTGTGATCAGTTTGTTCTCTTCAGTCATGATGTCGCCAACCTTAGTTGACTTGGAAGACCTTCCCTGCACTATGATTTTCCGGAGATAATCTCTCTCAGTGACAATGCCAGCGATTGATTTATT
circ_000906	chr1	197371541	197371746	-	Zm00001eb036250	197371541-197371746,	1	intron	206	GT-AG	CTCCACCCCCCCACCAGCGTAACCTCATCCCATGCTCTTGCTACTACCACCACCTCTGCCGTTTGGCATCGTCGTCTCGGGCACCCTGGACCTGATGTGATGTCCCAACTTTCCATCCGCTCAGGCATCTCCTATACTCGAGGCTCCTCTGAGCACCTATGTCATGCTTGTCAGCTCGGCCGTCACACTCGTCTTCCTTTTTCCAC
circ_000907	chr1	77027007	77027130	+	Zm00001eb020580,Zm00001eb020590	77027007-77027130,	1	exon	124	GT-AG	CTCCCTCCTCGACATCCTCCCGCTCGCCGACACCCCCGCCGGGCCGTGGAAGGTCTACGCCGTCTCGCGCCGCCCGCTCCCGCCCTGGTCCCCGGCGCCCTCCCCGGCCGTCACCCACCTCCAC
circ_000908	chr1	306464078	306464207	-	Zm00001eb064940	306464078-306464207,	1	exon	130	GA-AG	CTCCTCTCCATTCGCCACTCCCCCGTGCTCTCTCGCGCGTCCCCTCGACCATAGGGTTTGCTCCCTTCCTTCCTCGCCGCCCGATTTGATCTCGTCCCTTCCGGGCTCCGGCTAGGCTGCTCCGTCTCTC
circ_000909	chr1	71869170	71869444	+	Zm00001eb019730	71869170-71869205,71869279-71869444,	2	exon	202	GT-AG	CTCCGAAGTTATGTTGCTGTGCAAAAGCATTAGTCAAATACAACAGGGTCCACTGATATCTTTTACATCAGTTTTCACGCTGCTAGTGCTAAAGAACAATGATTCACTGTGACCTCGCAACTGGCTCCAGTGCCTCGATCATTACAACACTGTTTCCCCTGATAACCACCATTCCAATATCTGTTTTGTCATTTCCATTGAC
circ_000910	chr1	237212187	237214407	-	Zm00001eb045810	237212187-237212269,237214402-237214407,	2	exon	89	TT-AG	CTGAGCTAGCTTGGTGGAAAGTAGCTTTAGCGTCGAGTCACCCCCAAGAACTTCAGTTGCATCAAGTAGCACATCACTAACAGATGTAA
circ_000911	chr1	44910761	44911104	+	Zm00001eb013430	44910761-44911104,	1	exon	344	GT-AG	CTCTACTCCAGCGCCGGCGGCGGGTTCCGGCGGTGGTACACCCCGCACTGGTTCCAGGAGCAGGTGCCCCGGATGCCGTACCAGCCGCTCGTCCTCAGAGAGGCCTTCGAGAAGGTGACCACCTAGCTCGCACACGGCAGCTAGTAGCTTTGCGTGCCTCCTTAACTTGTTGGGTCGGTGGTGCGTGCCGGCCGGCGGCCGTTACTGACACTGACCTGGCCATGTGCCCGCGTGCGCTTCATGCACAGGCGGTCATCAAGAGGCTCATGACTGACGTCCCGTTCGGGGTCCTCCTCTCCGGCGGCCTCGACTCCTCGCTCGTCGCCTCCGTCACCAAGCGCCAC
circ_000912	chr1	240317135	240317904	-	Zm00001eb046590	240317135-240317346,240317841-240317904,	2	exon	276	GC-AG	CTGTCATAGGACGTAGCTCTAGTAAATGCTTGTATAACCCAGTTATAAGACTCTGTATCAGGTTTCATGTAATCTGAAAGAGAAGGGGGAAACGCAGTATCTATTTAGCAAAGTACCAACAACGAACAACAGTACATAATTCAGCCAGATACTTTTCTTTCTAATAAGAGAAGCATAAAGTACTGTTTCAGCGCTCCTGAGATACATCAAAACTTCACCTCCATATTCCATGTTTTCAAATGTTGCAAAGGCAACTTCAGGAATTCCACAAGTAGC
circ_000913	chr1	293527606	293527799	+	Zm00001eb060350	293527606-293527799,	1	exon	194	GT-AG	CTCTCTCCCCTCCCCCTTCCTCCCGTCCCCCGTCGACAGTCGCATCGCACCCTATCCTCCCCAGTCCCCACCAGTCCACCACCCTCTCCCCGCCTCCCGCTGCGACCACCGCACCGGCGAACTTGGAGGGCCGCTCGGCGCTGCACACCAAGCCGGGGATGGCCGCCGCGCTTGCGAGCTCGCCGCTTGTTCAC
circ_000914	chr1	175548094	175548350	-	Zm00001eb031330	175548094-175548350,	1	exon	257	GT-GG	CCCTCCACGCCGCGCGGCTCCTCTCCTCCTCCCCACCAACCGCAGCTGCGGCCTCGTCGTCGGCGGCGGGCGGCGGGGGCATCGAGAAGGTGCTGGTGGCGAACCGGGGCGAGATCGCGTGCCGGGTCATGCGCACCGCGCGCCGCCTCGGGGTCGCCACCGTGGCCGTGTACAGCGACGCCGACCGCGGGGCGCTGCACGTGCGCGCCGCCGACGAGGCCGTCAGGATCGGCCCGCCGCCCGCGCGGGAGAGCTAC
circ_000915	chr1	170281123	170282304	+	Zm00001eb030660	170281123-170281128,170282065-170282150,170282218-170282304,	3	exon	179	GA-AA	TTTATAAACCAGGAGCTCATTGACATTGAGGGCAAAATACAACCATGTTGTGGAGGAAGAATGATACTGTTCATTCCAGATTCCAACACAGGTAGTGATTTTTTATGTGAAGCTGTGCACTGCAGCATGTAGTCACTGGTATTGTGTAATGTGTATCTTGTGAATACAGCAACAATTTC
circ_000916	chr2	1583236	1585574	-	Zm00001eb065950	1583236-1583241,1585189-1585289,1585481-1585574,	3	exon	201	TG-AG	CTTGCACTTGAACTCAGAAGACCACGCTGAAACGTCTTCATCATGGAGGAGCTAAAACTTGACCCTTTTTCGACTTGAGATGAATTGATCAATTGCAACAAGAAGCACTCCCATTGATCAAGAGCATAGGCTTCCAGATCTGCTGGTGTGGGCAATCGACCAGTGACACTTAATGGTAAAGGTTCCCTTGGTAAACTTCCA
circ_000917	chr2	11923852	11928342	-	Zm00001eb071490	11923852-11924052,11927392-11927516,11927594-11927669,11928187-11928342,	4	exon	558	AT-CT	AGAAAATCAGGTTGGCAAATATCAAGGTTTCTCCCTTGAGACCTGATACATCAGTTTTCATGAAATGTGAAGGGATGATTGAGACACACTTCTCTACTTTTTTGTTTGTTCTTGAATGTTTTGTGTCATCATTCTTCAGGCTATTATCATCTGCCACCCTTTGTATTGTACCATTATTTGAATGCACAATGTCCACAAATGCTATAATAATAACATCCAGATCGGCACCCGCGTGTATATAATCAGGCTTTAGTTTAAGCCACTTTCCATTTCGATCACCAGGTTCCCATTTGGAATCAAGGTCCTTCAGTACAATGCCCTCATCTCTGTTCTCGATAGTCTCTTTGAAGAATTTATCAACGTCTTCAGCATTATGTGCAATAATCGACCAGCATGGTT…
circ_000918	chr2	191909639	191909952	+	Zm00001eb100930	191909639-191909952,	1	exon	314	GT-GG	CCGATCGACCACCCCTACGTGGACCCGCTCCTACTGCCGGCCTCCTCGTGGCAGCGCTTCGGCGCCTCCCGGGTCCTGGTCACCGTGTCGGGGAAGGACCGCCTGAACCCCTGGCAGCGCGCGTACTACGCCGCGCTCCGGAACAGCGGCTGGCCCGGGGAGGCCGAGCTGTACGAGACCCCCGGCGAGGGCCACGTCTACTTCCTCACCAAACTCGGCTCGCCACAGGCGCTCGCCGAGATGGCCAAGCTCGTCGCCTTCATTAATCGCGACTAGCAACCGGAGTACGTGCCGGCCGCCGCGGCATCTAGTAC
circ_000919	chr2	74116751	74117002	+	Zm00001eb085570	74116751-74117002,	1	exon	252	GT-AG	CTCCGTATGGGATGCAATATCCACCACCACCACCACCCCCAGCAGCTCCAATCCCTCCACCAGGCACTGCTCCATCAAGTGATGGAGCTCAGAACTATCCACCTGGTGTAACACCACCAAGTTCTGGCTCATCCACTCACCCTGTTGCAACATCAGTATATGCATCATCTGGTGCACCAAATGCACCATCGATATACCCTCCACCACCTTATAGTTATTCCTCATACTACCCTCCACCATTTCAGCCACCAC
circ_000920	chr2	4155070	4155204	-	n/a	4155070-4155204,	1	intergenic	135	AT-AG	CTCTTCTCCGCCCAATGATCGATCGTCCAACAACCGAACCAGTAATTAATTAATACCGCTGGTTAATTAATTCCTGTTCTTGCACCGTCCATCGTTCGCCGCGCCGCCGCCTTTCGTATCTATATCATCGCATAT
circ_000921	chr2	56709524	56709661	+	Zm00001eb083400	56709524-56709661,	1	exon	138	GG-GG	CCACTCCCACTCCTCCGACGTACACCCCTTCCCCCAAACCTCCGACACCTAAGCCGACCCCGCCGACGTACACTCCAAGCCCCAAGCCACCGGCTAGCAAGCCTCCCACGCCCAAGCCGACCCCGCCGACGTACACCC
circ_000922	chr2	166902779	166902886	+	Zm00001eb095540	166902779-166902886,	1	exon	108	TT-AG	CTCTTGAACATTCTTTTCAAATTTCTCCTTCAACTCCATCTCTCTTTCAGACTTCTTCTGTGCTCTTCCAACATACAGTTCCTTATCATTGAATATCTTGCCATTCAA
circ_000923	chr2	126945749	126949999	-	Zm00001eb090590	126945749-126946022,126949327-126949497,126949848-126949999,	3	exon	597	TC-AG	CTTAATGTGTGCAGTATAATGTCCACTTGCCATGTTGCCATAATGATTGCTCACAGCATACAGCTCATAGATCTGGCGCTCTGAAGTCTTCTTATTGGCAATGTAATTTGTCAAATCCAAGTCATGTATTGGAAAATTAACAAAAGTTTCTAGTTTTTGTTTTGTTGACCTACTAAATGAAAATCTCTTTAGATGTATGACTAGTACTTCAGGAAGTCTCCACAAATCCAACTTTTTGCTAGCTTGTCTTTGCTCCTTGCACCTTGGACAGTACCTGGCATACATCAACAATGATTGAATTATTTCTGGCAATATGATTTGCCCAATATTCATCTGCAACTTCTTCATCTGATCTTCCATCAGCATCCCCTGAATTTATGTAAGGTCTATGCTTCACAC…
circ_000924	chr2	108888088	108889582	-	Zm00001eb088370	108888088-108888249,108888373-108888452,108889017-108889098,108889429-108889582,	4	exon	478	TG-AG	CTTTGTAACAGCTTTAGCAAATTGACTCGGCTGCACGTCATTATCCTCTGGGCCATTCCAGCCTTCCACAATTTGGGGTAATTTTCTAAGATTTGCAAGCAACCTCTCTCTCATTATCTGGACAAGTTTGTTGTGAATTTCATCTCGATGGATCTTGTAGTCCTGAGCTACTCTATCCAGCTCAGACATTAACAGATGTTTGCGCGCTTCAGGTATTTTCAGGAAAAGTACTCGCCTGATATCTGGAATTAAAGAATGCATAAAACTAATGATTTGACTCGCCAAAGCTAAATGTTTGGACGTAATTGATTTAAGTCCAGACACCTGCATGGCTCCTGCACCGAGAACAAGTTGGCAAGTCCTAGTGTTGAAAAGCTTTAATATTTCCACAACACGTTG…
circ_000925	chr2	4866262	4866892	+	Zm00001eb067960	4866262-4866493,4866594-4866658,4866741-4866892,	3	exon	449	GT-AA	TTTGGAGATGATGAAATTGAGTAGTATCGTGGTTGCAGACGAGGAGCTATTGCTGCAAAAAACACTCCCAGTGGTGGCTTAGCTGAAGGGAATGCGGCCATAACTTCAAGAAGGCTCCTCTGACTAGCAGTTATCCATTGAGAATACTCATCCTTTCCAGAAGGAGAAGCCAAGAATCTAAGTCGCTCAGCTTCAGCTGGATCAGATGCGTGAGAAGCTTCTTCGGTGGATTGAGTAGATCAGCATATCGTAGAAGCGCAGTCCGCAAGGTACATGGAGATGGGAAAGGTGGGGCCAAGGAACCTCCTCCTTTACGAGGAGATCCATCTTCTGCATCTGCATGGATGGAGAAGAATGTGTCTGGAGAAAGGTCAAGTAGCCTTTCAACCTCCTCCACAG…
circ_000926	chr2	198333211	198333937	-	Zm00001eb102470	198333211-198333216,198333746-198333937,	2	exon	198	GG-CG	CGCCGGCATGGTGACGACGTCCCTGGCGGCGATGGCGAGGATATCGGCGCAGGAGACCACGCCGGGGCACTTCTTCTCGACCTCGGCCTTGGCGCGCACCACGGTGTCGAAGCCGTCGCCAGCGAGGGACACGTTGTCGGGCGCGTCCTTCTCGGCGTCGTTGTCGCGGGACGCGATGATGACCGACGCATCACAGCC
circ_000927	chr2	69809795	69809965	+	Zm00001eb085200	69809795-69809965,	1	exon	171	AT-AG	CTGGTTTTGATTTGGCTGATGATGGTTGAACAACAACGTGCATCGTGATAGCACTACTGGGAAGATCGCCAAAAGGAGCTCTGCACTGTGCAACATTCTTGTCATTTTCTAGAATTTTGCCGCCACTTATTAGTTTTACATCACTAGCAGTCTTTGGGATAATTTGTTTAT
circ_000928	chr3	82707698	82707894	+	Zm00001eb132370	82707698-82707894,	1	exon	197	GT-GG	CCGCGCCGCCCCTCCGCCACCGCGCACACTCCTCCACCGCACGTACCGCGCTCACTCCTCCACCGCGCCGCCGCCAGCCACCGCGCTCGCCGCGCCTCCGCCACCGCTCCTCCAGGATTCAGATTGCGGCCGCGGTGACTCCCCGAGCAGAAGAACCCGATCGAACGCGGCCGTGGCGACTCCCCGAGCAGAAGAAC
circ_000929	chr3	29954949	29955909	-	Zm00001eb126630	29954949-29955053,29955904-29955909,	2	exon	111	AG-AG	CTGCAACGCATACGTGAGACGAATGTTTTCCTCAATAATATCTTGCCTGTATGACAAAGCTTTTGAAGCTGCATCAATTAAATCATGCTGCTGCTGGTCAAATGCTTCCCT
circ_000930	chr3	200204175	200205143	-	Zm00001eb152410	200204175-200204276,200204375-200204452,200205138-200205143,	3	exon	186	GT-AG	CTCTGGTCTTTTCCAATACTCCTTGAAAAGAGATGGACTTCTAATGCAGAGCTCGCCAACTCCAGTTGTAGTTTCAGCCCCGTCCTCCATAATGATCTTGGCCTCAATGCGTGGAAGAGGTTTACCAACTGTACCTTCTTTTCGGATACCATGCAATGGATTAGACAGTGCCATGACAAACTCAAC
circ_000931	chr3	198956825	198961009	-	Zm00001eb152060	198956825-198956937,198961004-198961009,	2	exon	119	TT-AG	CTTCCAAGTTGGCTCACAAGTACTAACAGAGCAGCTGAATAGTCACGGCACATGCACAATTCCAGAATCTCCAGAAGACGGATAACGACATTGTTGTATGTCCACTCGCAGCTATTCAA
circ_000932	chr3	7887743	7888754	+	Zm00001eb121540	7887743-7887987,7888749-7888754,	2	exon	251	GT-AG	CTTTCTCTGTGGATGTAGTTATGTTTATGGATGGATTCGATAGCAAGAATAGTCTCAGCAACGTAGAATCGTGCCACATGTTCAGTCAAGGTATCCTCTCTCATGAGAAGGGTCATGATATCACCACCAGGGAGGTACTCCATAATAAGGTAAAGATACTCAGTGTCTTGGAAAGAATAGTAAAGCTTCACAATGCAGTGATGACTAGCAACTTCGGCCAACAAGTTTCTTTCAGCTCTAACATGTTCCAC
circ_000933	chr3	121657684	121658273	+	Zm00001eb135780	121657684-121657839,121658209-121658273,	2	exon	221	GC-CG	CGGTGATGATACACCAGGGGTTGCTACCATGTCGTCATTCAATTGTAACGAGGGGGACAGCGATCCTTTAAACTTAAAGATGCTATGTTCTTATCTTCTCTATATCTCCAGAGGGATAGAGCTCTTCCATCAGCTGCTGATTCAGACTCCAGTGTTGATCGCCTTGATCTTGAGCATGATATTCAAAAAGGGTGTATTGAGAAGGACAAAGTCCGTAATGC
circ_000934	chr3	7887743	7889746	+	Zm00001eb121540	7887743-7887748,7889633-7889746,	2	exon	120	GT-AA	TTCCTCGAATTTCATGAAATTCTGTGTGTCCAGTTCATCATTTACTTGAGGCTTAAATGCTGCTTCCATTTCATAAAGTTTATCCCATGCAACTCCTCGGAACCAAGGATGTGCTTCCAC
circ_000935	chr3	12740057	12745408	+	Zm00001eb123050	12740057-12740157,12741077-12741152,12745403-12745408,	3	exon	183	CT-AG	CTTAAATTGTAAGTTTGGAAATGCCCAGTCGGTTACAGCCCATATCTTGCAGAGTAATCGAACAGCCATAGCATACAAAACCGAATTTGAGTCCCTTTTAAGCATTGGCGATATCCATTGCAGAGCTAGTGGAAGAACAAAACCATGTATAGCAAGTGATGGCAATGACTCTAGCAAACTGAG
circ_000936	chr3	222135054	222135293	+	Zm00001eb159160	222135054-222135293,	1	exon	240	GT-GG	CCCGACCCCAAAGTCACCCTCATATTTCCCATGTTCAAGCACCTTCAGGTCAGTCGCAGCTTCATCAACCAATTCAGTCAGCCCAAGTTCCACAGGTCCAACCAAGTCAAGTTCCTCTCCAACCATCTGGTCTCCAAGTACAATCTGCAGCACATCCATCTGCTCCTACTCAAGTTGGTAATCAGCAATTTGCGACTCAAGCAATGGCGTATCAGGTCCAGCCACATGTACAAGCTCAAC
circ_000937	chr3	233859152	233974631	+	Zm00001eb162910,Zm00001eb162920	233859152-233859232,233859309-233859401,233859479-233859532,233974526-233974631,	4	intergenic-genetic	334	GA-AG	CTTCTTATGCAGTTCCACAAGATAGTTCTCAAATAAATCTTCACGCTCCCTTGGACGCTCAACTGCTTTGAATCTTTCATCATCTTCAAACATAAGTATTGCTTTGCTTTTGTACCCGCTTCTGCTCTTCCTCTTCTTTCTCTAGGTGTCGAATGTACTCTTGAAAAATATCCAACCGATCAAACTTCTCAAGTCGGGAATAACGTTCATCGTCCTCCAGACGTTCCTGAACTTTTCTCCACTGAGTACTTGCCTTGATGAAGTCACATGATTCTAGAAAAGCTCTGTATTCTGCTACATATCTTTTGTGTTCTTCAGCAGCCTTGGCTTTTTC
circ_000938	chr3	30609849	30610025	-	Zm00001eb126710	30609849-30610025,	1	intron	177	GT-AG	CTCTTGAATCGTCCTTGTTTTCACTATTCTGTTTGGGATAGCAGCGAACAGCCTTGGGACCGTATCCCCTAGTCTATGCCCATGTAGCCACTTGTCGGTCCAAAAAAGGGTAGACGCTCCATTCCCTACCTCAGATATCAACACCGTGCTGAAGAAGTCCTGGAATTTGCTAGGAAC
circ_000939	chr3	9167980	9168109	-	Zm00001eb122090	9167980-9168109,	1	exon	130	GG-TG	CACCACCCAACCACCGCCACCTCCTCGGCCTCTCCCTCGCACGCGGCTCCGTCCAGCGTCGTCCCGGCCCCCACCCTCCACCACCACTTCCATGGCCATGCAGCAGGAGCGCCGCACGTTTCCCTTTCCC
circ_000940	chr3	237863176	237863413	+	n/a	237863176-237863254,237863331-237863413,	2	intergenic	162	CA-AG	CTTAAGTCTGTGAAAGAAGAAGTTTTATATAGGTCTGATTATGTCCACTTCAGTATCTGCAAGCTTTTTCCGCAGTTCGGACGATTATCCTGCAGTATATATCTTGTCCCGTAGAGAAGAAAAATGCACCAGAGCCAGAATAGGCAACAATATTGCGAGGTG
circ_000941	chr3	130940809	130940994	+	Zm00001eb137140	130940809-130940994,	1	exon	186	GT-AG	CTCCCCCACAAGCGCCTGGCCTACCTCGCCGCATCTCTCTCGCTCCACCCGGCCTCGCTCTCCCTGCTCCCGCTCGCCACGCACCAGCTCCACAAGGACCTCTCCCCCTCCGCTGGCGCCCACCAGCACGTCTCTGCGCTCGCGCTCCAGCTCCTCGGCTCACCCGCCGCGGCTGCCGCTCCCGAC
circ_000942	chr3	186808520	186808801	+	Zm00001eb148640	186808520-186808801,	1	exon	282	GT-AG	CTCCCCGACGCCCGCCCGCTCTTCTCCTTCGCCACCCGCTCCGGTGTTCCCGCCGGCTTCCGCCCGCCGCAGCGCCGCGTCGTCGTAACAGGCGGGGCAGGGTTCGTCGGCAGCCACCTCGTCGACCGGCTTCTGGAGCAGGGGGACAGCGTGATCGTGGTCGACAACTTCTTCACCGGCAGGAAGGAGAACGTCGCGCACCACCTCCGGAACCCCAGGTTCGAGCTGCTCCGCCACGATGTAGTCGAGCCAATCCTCCTCGAGGTGGACCGGATCTACCAC
circ_000943	chr3	230251871	230251979	-	Zm00001eb161850	230251871-230251979,	1	exon	109	GT-GG	CCAAAGCAACAATCACGGGAGCCAACCAGGCACGGATCGTTGTTGTTGTAAGAGGAGAGGTGTAGTATTAGCCCGAAAAATCCAACCATTACAAAGAACACAACCACAC
circ_000944	chr4	171339775	171339945	+	Zm00001eb190060	171339775-171339945,	1	exon	171	GT-AG	CTCATCTTTGGCCGCACCAAGGTTTTTCTTGTTGGCCAGATCCATCACCTTTCTCAGGTGCTCCACCTGTGCGCGACGGGCCAGCTCCCGGCTCACATTTGGATTCATGGCAGCCTGTCCCGGATTCTGGACGCGGTTCATCTTGATGTCCAGGGTGTTGGTGACCTTCAC
circ_000945	chr4	1361129	1361394	+	Zm00001eb164530	1361129-1361394,	1	exon-intron	266	GT-GG	CCGACCTCCGACGACCCAGCCTCCTCCGACGATCTCGTCCTCCCCTTCATCTCGCGGATGCTCATGGAGGAGGACATCGACGACAAGTTCTTCTACCAGTTCCCCGACCACCCCGCGCTCCTCAGCGCCCAGCAGCCGTACGCACAGATCCTCTCCGACGCCACCGCCTCCTCCTCCTCCGACTCCGCCACCGCCATCAGCTCAGGGACCGTCGGGAACTCCACCCTCTCGTCCTCCTCCCTTGCCGCCGCATCTGCCGAACCCAC
circ_000946	chr4	179681394	179682141	-	Zm00001eb192570	179681394-179681475,179681552-179681793,179681970-179682141,	3	exon	496	GT-TG	CAATTCCATCCAAGCTATATCGGATTCATAGTAATCATTTGAAAGGAAAGCATTCGCCTTGGTTCTCAGCAAATTCTTGAGGCTTGGAGAATCAGAGCACGCTGATGCTTTCTCAAGAAGCTCAGCTGCTTTCTCTAGGAATGGTCTATACTCCTTGGAGTATGGAACAATAAAAAGATCATCTTTAGTCTTGGTCTGATCCGATCCATCTGATTGTGTTAATGACGATGAAGACAGAGAGTCATGTCGTTTTATGACGGTGAAAAACCCAGTGGCATCATTTTGTTCTTTATCTGTCAGTTTACTCTTCCAAAGTTCAAACTCCGCTTTGTCCATGTCAGGAGGATAGAAGTTAGCACCGGGAGGCTTATGTAGAGGAAATGCTGCTCGATACTCAAT…
circ_000947	chr4	153477215	153480585	+	Zm00001eb185960	153477215-153477326,153477509-153477679,153480452-153480585,	3	exon-intron	417	AT-AG	CTAGCTCCTGAAGATTAATATCTGGAGACAGGAAAGAATTCTCCTTCATCTTATTTGTATGAATTTGAAGGATTTGCAAACGACCATTTTCATCAGGCAGGTTTATCTCAATGTGTACTTCCAATCGTCCAGGTCTTAATTCCTGAATTAGGAGCAGCCTCAAATATGATGTATGTATCACTGGACAAGAATCCTCTATCCAATGGTGTAGAACTCTCTTGACCCTCTAGCAAAGCTTGATTGACGGTGAATACATAGTTTGTTCCATAAAATTCAAATGGCACCCTTTGCCCTGAGGTCATGACCTGATTCAGAAACCTCTTACGGAGTTGTTGGGCAAGCACAACAGCATCCAGCTGATAAGCCAAGACAATGAATATCAGATGACACTGATCAATC…
circ_000948	chr4	32775385	32775682	+	Zm00001eb172100	32775385-32775482,32775606-32775682,	2	exon	175	GG-TG	CATTTCGTGCAGCATTCTTCGGCTCTACGAGTGGTTAATTTTTCACTGATAGCCTCCCAAGAAATGTTATCTCTTATATGACGGTGACCAGTATTGATGTTTTGATGGGCTTTCACACGCATGTCCAGATTTACCAAATCAAACAAGTTTTGGTACTCATCCTGACTCCAAGTCC
circ_000949	chr4	237236315	237236487	+	Zm00001eb204940	237236315-237236487,	1	exon	173	GT-AG	CTCCCCGAATTCCCCAACCCGCCATGCCCGACTCCGCCGATCCCCTCCCCACGCAAGCCTCGCCGGATCCGGACATGCCGCCGCGGAAGCCTACAGCTGGCTGCGGCGGCGGCAAGCTCAAGAAGCCTCTCACTGACAAGCAGCGCGCTGCCGCGGAGCAGCGCCTGTCCCAC
circ_000950	chr4	180058521	180058629	+	Zm00001eb192680	180058521-180058629,	1	exon	109	GG-AG	CTTCCCACCGACCTCCACCACCGCTTCTACCACGGATTCTGCAAGCACTACCTCTGGCCGCTCCTCCACTACCTCCTCCCGCTGACGCCGTCCTCGCTCGGTGGCCTCC
circ_000951	chr4	192787888	192787986	-	Zm00001eb196530	192787888-192787986,	1	exon	99	GT-TG	CATGTCCTTCTTCTCCCCGTTCTTCTTACTGGCGCCACAGTCGTCCTCCGCCTTGTCGTCCATCCTCTTCCTTACCACCTCCCGAAGAGCTCCGGCCAC
circ_000952	chr4	96801775	96802714	+	Zm00001eb180520	96801775-96801910,96801994-96802081,96802562-96802714,	3	exon	377	TT-GA	TCATATTTTCTGGCAAGAACCCTCAGGACATATAAAGCACCAAAAATTTGGTTCTGCAAGTCTAAATTGTGTGAAACCCAATGAAGGAGACTTGGCCACTGCTCAGGATAATCAGAATGAACTATTGTTTTGATACTTTCTCCAAGCTGGGCTCTTAACAAAGGGGGCACTTGAACAATAAAACCAAGTATGTTTTCACGAACCATGGCCTTGTCGCTTTCTAAAACTTTCGGGGACTCATCTGGATCATTAGGCGACCAGTTCTTCGCAATAAAATTCTTGAAATGAATGCTTGCAACCTGTCTTACAGCCATATCACAACTTCCATCAACAATGATCTGTAACAATCTCACCAAATGCTGTGGTGTGTACTGGAA
circ_000953	chr5	223892092	223892221	+	Zm00001eb258780,Zm00001eb258790	223892092-223892221,	1	exon	130	GT-AG	CTCCCTCCTCCCGGCCAACTACAACTTTGAGCTCCACAAGACGGCGCACCGCATACGGTCCGCGGCCGCTCGCCGCGTGGCGCTGCAGCTCCCCGAGGGCCTGCTCCTCTTCGCGCTCCCACTGTCGCAC
circ_000954	chr5	122094973	122096293	-	Zm00001eb236070	122094973-122095096,122095519-122095609,122095708-122095834,122095993-122096096,122096208-122096293,	5	exon	532	GT-CG	CGTGAATTTAGGAACTCGAATTTTGTAAACGTCAACAAGTTCCATCATCAAGTCATACAGGTTAGTGAAGGCACTATCCAATATCATGCCACCAATAGAAGGGTCCTCTGCTCCATAGAGTAGGCATGTAACGGCACCCATTGATCGCCCCCAAAGGCCTATAGTGGAAACTTGTTTATTGTCCCGAAGACATGACACCGCACATTTGAGGTCTTCTCATGCCAACCCAAACTGACATAATCCCCGCCGGATAGACCTGACCCAGAAAAGTCAAGTGTGAAAACAGTGATATTTGAAGGAAGAAGTATAACAGCGGCTTCATTTGCATCTGCTCGGCATCCGCTATTTCCATGGCAATAGACCACACATGGGAGGGCAGTATTCTCTGGGATAAAAGCA…
circ_000955	chr5	122094973	122096293	-	Zm00001eb236070	122094973-122095096,122095519-122095609,122095708-122095834,122095993-122096096,122096187-122096293,	5	exon	553	GT-CG	CGTGAATTTAGGAACTCGAATTTTGTAAACGTCAACAAGTTCCATCATCAAGTCATACAGGTTAGTGAAGGCACTATCCAATATCATGCCACCAATAGAAGGGTCCTCTGCTCCATAGAGTAGGCATGTAACGGCACCCATTGATCGCCCCCAAAGGCCTATAGTGGAAACTTGTTTATTGTCCCGAAGACATGACACCGCACATTTGAGGTCTTCTCATGCCAACCCAAACTGACATAATCCCCGCCGGATAGACCTGACCCAGAAAAGTCAAGTGTGAAAACAGTGATATTTGAAGGAAGAAGTATAACAGCGGCTTCATTTGCATCTGCTCGGCATCCGCTATTTCCATGGCAATAGACCACACATGGGAGGGCAGTATTCTCTGGGATAAAAGCA…
circ_000956	chr5	224212003	224212770	+	Zm00001eb258950	224212003-224212053,224212535-224212611,224212726-224212770,	3	exon	173	GT-AG	CTCCTCCCCTCCCCCTCCGCCGCCTCCTCGCAGCCTCAGCTTGCGGCGTCGGCGTGCGCGGCCGGGGACAGCGCCGCCTACCAGAGGTCCTCCTCCTTCGGGGACGATGTCGTCGTCGTCGCTGCCTACAGGACGCCGATATGCAAGGCCAAGCGAGGAGGCTTCAAGGACAC
circ_000957	chr5	219564099	219564284	-	Zm00001eb256430	219564099-219564284,	1	exon	186	GA-AG	CTCCTCTGCTCCCCCCGCCGAATCCCAATGGCTTTCAAACCCTAGCTTCTCCTTCGATGCCTCCTCCCTGAACATCCCGGCTACCACCTCATCGTCGCTCCCGTCGCCGCAGAGCCACTCGTCCGATGAGGACACGCCGCTGCAGGCCGCTCCTGCGAAATACGAGCTGGTGCCTTCTTCGCCGTC
circ_000958	chr5	194341995	194342493	+	Zm00001eb248840	194341995-194342068,194342167-194342265,194342394-194342493,	3	exon	273	CT-AC	GTGTTCTTGACAGTGCAAGCTTGTCCAGCGACCCATCATTGTGACTGACTCTTCCCGAGAAGTTTCTGGAGCTGTCCATTTGAAAGCGCATTTACTGTATCGTCTGAGCCACCAATATGCTGTCCATTGACAAACACCTGTGGCACAGTACGACGCCCAACTAGGTCCAGGAGAACACTTTGAATGTCACGCCCATCCACTCGGGTATCTAGTTCAACAACATATGGATCTTCCTTAAGGTCTCGAAATATGTGCTTAGCACGCATGGAGTAG
circ_000959	chr5	205350080	205350241	+	n/a	205350080-205350241,	1	intergenic	162	GT-AG	CTTCAATCACTCGGCGTGGCCTCTAACACGCCGATCTCGTGTTCAATCGCTCGACATTACTTCTAAAACGCCGACGCCGACCTCCAATCACTCGGCGTTGCCTCCAAAACGCTGAACTTGCATTCTATCGCTCGGCATTACTTCTAAAATGCCGACGCCGAC
circ_000960	chr5	66236806	66237598	-	Zm00001eb228700	66236806-66236811,66237251-66237376,66237489-66237598,	3	exon	242	TA-GA	TCTGTCCAGTTCTTGTTAATGTCTGCCCCCTATATGACACCCAAAGACAAAGCTTCTCTTCCAGCTGTTCATCTTCACGGAGTACCTCTTCATTCTTGCAGCCCACCCTTTCGAGGAAATTTTTCCATTCATCTGGGTAAATTTTTTGCAAGTAGAAAAGAATGGAAACTCCATCCTCATTTCGCTCTTCCAGATTTTGTAATGAAAACAGAACATCTTCCTTGTAATAAGGAGTCAAGATA
circ_000961	chr5	154799838	154800659	+	Zm00001eb239530	154799838-154799864,154800573-154800659,	2	exon	114	TT-AG	CTTCTTCACACCGCGGATCTTCTTCGCCCTGTTCTTCCTCTCCTTCATCTGCTTGCGCGACTTCTCCACCTTGGTAGCAAGACCGTTCCTGATAAGCCTGTACTTGGGCTCGAA
circ_000962	chr5	79355529	79355690	+	Zm00001eb231860	79355529-79355690,	1	intron	162	GT-TG	CACTAACATGATCCGCCTCCTCTTTCAGCCGTATCTTCTTGCCAGCTATTGGACAAAGGCCCTGAATACTGCTACCTATCTCCTTAACCGCCTTCCCTCCAAGACGGTGAGTCACCCCACTCCTAGTTCGCCCTGTATGGTACAACCCACTTTTATGTCCAC
circ_000963	chr5	146919816	146930508	-	n/a	146919816-146919900,146919991-146920067,146930203-146930295,146930392-146930508,	4	intergenic	372	AT-AG	CTGAGAGTCCTTAGTTGCACTTGATGTGAAAAAGAAATCATTGTTAAGACGCATGGGCCAACCAAGCTTAAAGCAATCAGCAGACCAGAAGAATTCATTGAGGTCATCATAGTTTCTCCATGTTGAGTGATCAGATGCCCCGTTCTTGTTCTTTTGTGATTCCATTTGAGCGGAGGATGACTTGGGATTCAATCTAGCATGCATATTTGCAAGCAATAGAATTAGATGCTCCCTTTGGTTGGCGACATTTCCTTTCTGGAATCCAAACCAACTTTGCAGCCACCGAAGAATATCTGTATGATTTTTTTCATCCTTCATGTTGACTGATGGAAGACTGCGAACACTAAACACAGCAGCGACTGCAACTTTGAT
circ_000964	chr5	69451706	69451858	-	Zm00001eb229450	69451706-69451858,	1	exon	153	GT-AG	CTCTTCTTCCCCTTCCCTACCCCTGCCTCGTCCTGCCCCTACATCACCGCCTCCTCCGCCCACCACCGCTTCCTCCTCGACGACCACCCCTTCTACCCAACCTCCTGCCCGCTCGGCATCACCTCCCGCTCCCCGATCGACGACACCTTCGAC
circ_000965	chr5	155056080	155056385	+	Zm00001eb239600	155056080-155056385,	1	exon	306	GT-TG	CAACTCACCGGCGAGCTCCCCGAGTCGCTGAAGAACCCAGCATACGACCGGTCGTTCCTCGGAAACCGTGGCCTCTGCGCCGCGGTGAACCCGAACGTAAACTTCCCGGCGTGCCGCTACCGCCGCCACAGCCAGATGTCAATCGGGCTGATCATCCTCGTCTCCGTGGTCGCCGGCGCCATCCTCGTCGGCGCGGTCGGGTGTTTCATCGTCCGGCGGAAGAAGCAACGGTGCAACGTGACGTCGTGGAAGATGATGCCGTTCCGCAAGCTGGACTTCAGCGAGTGCGACGTGCTAATAACCAAC
circ_000966	chr5	217337264	217337349	-	Zm00001eb255550	217337264-217337349,	1	exon	86	AT-AG	CTTGAAGTAACGATCATAACAGTTCAGTCATTTCAATACAGGCTGCTGACAATTCGTGTATTCACAGTACGTAGATCCACCCACAT
circ_000967	chr5	209676676	209681444	+	Zm00001eb252300	209676676-209676959,209681334-209681444,	2	exon	395	AA-AT	ATTTTGAAATTTGAGGAGCATCTTCCCAAGATCAGTGTAATCTCTACAGCAAGACGCTTCCAGAGCAAATTCCTTCCATGTTGTAGCCTTCCGAGCATCATCAACTACAGCCTCCACAGGGTTACATACTATATCATCTTTTGGTTTGACATCAGAGCCTGCCCACCCATAATCATCATGTGAGATGGTCACCTTCCTATCATAGTCAATTGATGATGTTTTATCCACGTCATTTTTCAACTTGCAGTCCATTTGCATAACAGGAGGGTCCATCAGCATTGCTTTGCCAGGATCTGGTCTACCAATCCATATGAGAAAGAATAGCAGGACCTCCAAAAGCAGTGCTGGAATTATCCTCTACTAGCATGAAGCCCATAAAGACTGTTGACTTAGTT
circ_000968	chr6	77511366	77635804	+	Zm00001eb270000,Zm00001eb270010,Zm00001eb270020,Zm00001eb270030	77511366-77511514,77635799-77635804,	2	intergenic-genetic	155	TT-AG	CTTTTGCATCTGTCTCTTGACAACATTAGACTTCTTCATGGTGCAAATGTATGCTGGAATGCCAGAGCCACAGGCACGTGACAAACCAAGCGCAGCTTCTTCTTGCTTGGGTGTAAGTCTTGTGCGATCGCCATACCATAGGTTAGGTCCCACAA
circ_000969	chr6	160722579	160722791	+	n/a	160722579-160722791,	1	intergenic	213	GG-AG	CTCCTACCCCTCTGCTCCGCGATTACGGGGATACGAGGCCGCCATCACCGCCCATGATCCTCGGCCGATCCCTGCCATCAACGCGCAGGCAACACCGTCGATGGAAGATGGCGCGCAGGCAACACCGCCCATGTTCCTCGGTCGATCCCCGCCATCAACGCGCAGGCAAGACCGTCATCCTCCCCTCTGCTCCGCGATCCGCCCCATCGCGCC
circ_000970	chr6	49291038	49291123	+	Zm00001eb267280	49291038-49291123,	1	exon	86	AG-CT	AGCTCCTCAGTTGAAAAGAGCTATGAGCTGCCTGATGGCCAAGTAATCACCATCGGCGCAGAGAGATTCAGGTGCCCCGAGGTCCT
circ_000971	chr6	171075237	171075844	+	Zm00001eb293240	171075237-171075259,171075412-171075501,171075567-171075650,171075763-171075844,	4	exon	279	AC-AG	CTGGAGATTCTGAAAACCCATGCTGACGAAGTTCAGTTGCTGAAGTTGGTGTTTCAGCGATTACTTGAGACAAAGATGAGTCCATAGATTCTTGAAACTCAGATCCAAGATAACCACTGGTTGTACGAAGCCTATTGTCCAAGAGTAAATAATAGGCAACTGTTGCCTCATTCTGCAATCTGTTTTGCAGAGATTCAATTAGCTGATTCTTGTCAAAACCCATCTTAATAACATCATTAAGAGTTTCCTCGTCGACCTTTTTAACTTGTTGAGCAGTGT
circ_000972	chr6	114372070	114374202	+	Zm00001eb277320	114372070-114372219,114372291-114372351,114372434-114372486,114374197-114374202,	4	exon	270	GT-AA	TTGAAGTTGTTCAATACGGGAAGACCCAAAAAGAGGGTTGTCATCCTTCAAGCGAGCAACATAGCGTGCGATAGCATTACTCTCAAAAACAGGGCCATCAGGAGTCTCCAGAACAGGAACCTTCCCAAGGGGGTTCATCTTAAGAAACTCAGGGGTCTTGTTGGAGACACCCATCTCAAAATCCTTGGTCAACTCAACCTTGATCCCACTGTATTCTGCAGCAATAAGTGCTTTGAAGGCATTCTTGTTTCCAGCCCCACTATGCAATAC
circ_000973	chr6	147208514	147222083	+	Zm00001eb285140	147208514-147208744,147222078-147222083,	2	exon	237	TT-AT	ATATAGCTCGGAGAAATGTAGGTGATAGTCATTTAGTTTCTTGTCCGTCCATTTCTGAATTGGAGACAGGAAAGACTGGAAAAATGTGAAGTCTTGATAGCTACCCTCAGCATCAACAGAACTACGCAGGCTTTTCAAGTGTAATCTTTCTTGCGGACCACGCTGTTCTTTCAAAGGTATCTTCCTCAAATTGTCAATCACGACTTTCAGAAGTCCTTGCTCACCTGTAAGAACAAA
circ_000974	chr6	73286106	73286329	-	Zm00001eb269560	73286106-73286329,	1	exon	224	GT-AG	CTCCAACTACCCGAGACCATCGACGAGCATCTTCCTGCATCTGCAATGGCTGCCGCTACCGTGTCCGTCCCCCGCATCAAGCTGGGCTCCCAGGGGCTAGAGGTCTCCGCGCAGGGCCTCGGCTGCATGGGCATGTCCGCCTTCTACGGTCCGCCCAAACCCGAGCCTGACATGATCAAGCTCATCCACCACGCCGTCGCCGCCGGGGTCACCCTCCTTGACAC
circ_000975	chr6	145641025	145641294	+	Zm00001eb284760	145641025-145641099,145641105-145641294,	2	exon	265	GC-AG	CTCTCCCGCCGCACCCATCGTCTCCCGTTCCCGGCTAAACCCTGCTTGAGCCCTAGACACCGCCCGCCTCCGGGAGGTAGAGAGCATGCACGCCAGGTTCCTCAGCGCGCCGTCCCCTGCCTCCGCCGCCCCCTCCCCGTACGTTCGCTTGGCCTTCACGGGCGCCCGCCCGCGCCGCGCGTGTTGGAAGAGGCCCCGCGTCCGCGTCCGCGCCGCCGCCTCGGCCTCTCCACTCGCTGTGCGCCCGGGCCTCCATGCAGCCCGC
circ_000976	chr6	131468741	131469100	-	Zm00001eb281130	131468741-131468906,131468999-131469100,	2	exon	268	GC-AG	CTCAAACATGTTCAAGTATCTTGTGAATAACAAGGGAAGAAAAGCATCCCAGTTCACAGATCTTGAATTTTTTATACAACGTGCTATGATGGAAGCCCATTGGATGTCCCAGAAGTTACAATTTGTGACAGAATCCCATATGTCCAGACAATTTCTAATCCAATCAGTTGTAAAGTGATCCTGATTCCTCGAGTTCGCTGGAAGAAACAGCCTGAGAAATCCAACACCTTCAAATGCTGAGTTATGCCATGGATTTTCCAGCAAGGGC
circ_000977	chr6	167574702	167575086	-	n/a	167574702-167574801,167574983-167575086,	2	intergenic	204	GG-GT	ACAAGGAACTTGAACAATTCCGAACTCCTGATTGCACAAGCATAAGCAGGACCAAACTCGCCTACAACCCATTCATCCATCCATCCATATAACTGAACTGCAATAGAACAGCGATTTGGGTAGATATATCCTGACAATCTTCACCCGGTACTATGGGCATCAGTCCAGCCAACGCCTCAATCTACTTCCAAAGCTCTGTTGCCC
circ_000978	chr7	162225402	162225543	+	Zm00001eb322690	162225402-162225543,	1	exon	142	GT-GA	TCCAAAACACACACACGACACACAAAAAATCCACCAGCACGCGCTACACTGCGTGATCTACTAGATTCTTCCTTCAATCTTCGACTAGGAGGGGCTGCTTCTTGTCGTCCCACTTGTCCAGCCTCGCCTTGGCGTTCTCCAC
circ_000979	chr7	26266369	26266577	+	Zm00001eb304410	26266369-26266577,	1	exon	209	GC-AG	CTCTCCACAAAACCACCCCCACCGCACCACCCCAACACTCTCGCCACCGAGCTTCTCCGCCTCCTCTCCGCCGCACCCTCCTGGACGCCCGACCTTGCCGGCGCCGTCTCTTCCTCCCTTTCCACTGCCTCCGCCTCCGCCGGCGATGCCGTTATAACCGTCCTACGGTCCCTCAAGAACCCCTCTCTCGCCGCTCCCTTCTTCCTTGC
circ_000980	chr7	37526490	37527469	+	Zm00001eb305980	37526490-37526610,37526843-37526912,37527179-37527266,37527349-37527469,	4	exon	400	TG-TG	CATTTTCATTCAATGCGATAATTAGTGACAGATCATCTTCCAAACTTGCTTCACCGACATGCTTAATAGGAAGACCTACAGGAAGAATTGCTCCACCTTGTAGATACAGCAGTGGCAGATCAGGATGTGAATCAGCAAAATCAAAAGGCAACCATATGCCCTTTGGTAACTTATGTGCACATTCATGAGCTCCTTTATTAGGTAAAGTGCTTGCACAGACTAAGAGTGGTCCGAGGAGAAAGGAAGTCTCAACTTTCCTCAGTTCAGGGTCTTGTGGATCAGCAAAGAAAACTGGAGCAGCAACTGGAATACCCTTTGTATGTGAGTGGTAAAAAAGAGTGTAGATATGTGGTAGTAGCCGGTACCGTCTTAGTAGTGCAAGGCGACAGACTTCCTCACA
circ_000981	chr7	96947666	96947937	+	Zm00001eb310290	96947666-96947937,	1	exon	272	GT-TG	CACCCCACAACATGGCCCTCTCCCGCCGCCTCCTCCCGCTCTTCCTCCGCCGCGGCGCCTCCATCCCCACCCGCGCTCTCTCCACGGCTGTCGCACCTGCGGCGGTGGCCTCGGAGGAGGACGAGGCGGCCGTCACCGTCAAGGGCGTGCGCATCTCGGGCCGCCCGCTCTACATGGACATGCAGGCGACGACCCCCGTCGACCCGCGTGTCCTCGACGCCATGCTCCCCTTCTACCTCTCTCGCTACGGGAACCCTCACTCCCGTACCCAC
circ_000982	chr7	179205116	179205507	-	Zm00001eb329250	179205116-179205265,179205474-179205507,	2	exon	184	GT-AG	CTCTATGACATAAAATTCCTTAAGAAAGCTATAATCTATACGACTGCGGTACAAGAATACTGATAACATATCAAAGAGTGCACCAACTTCAGTTCGATCGTGTCTTAAGTAATTCAGGAAGCATTTGATCAGCCTCTTGCTTTCCATCACCTGGGGTAAACTCAAATCCTGCTCGTTCTGCAAC
circ_000983	chr7	102401747	102402639	+	Zm00001eb310870	102401747-102401752,102402537-102402639,	2	exon	109	GA-AG	CTTGAATGCAGGCTCATCCCAGCATGGGAAGCACCGCCGAGCATCCACAGACTCAAATTGTGTCACTGCCATATTCTTCATCTTTCCCTTATACTGGTACTTGCGCGTC
circ_000984	chr7	15804247	15804533	-	Zm00001eb302680	15804247-15804533,	1	exon	287	GT-TG	CACTCCCAGACAGACCCCCTTTCCCCTCCCTCCTCGGCCTCCTCGACCACTCCGACGCCCACAGCGCCTCCGGCGAGCTCCACCTCTCCACCGGCGGCAGCGAGGGGCGAGGGGGCTAATACTGTAGGCGGAGGAGGAGCCGAGCCGATGGGGCAGCAGTCGCTGATCTACGCGTTCGTGGCGCGGGGCACCGTGGTGCTGGCCGAGTACACCGAGTTCACCGGCAACTTCACCACCATCGCCGCCCAGTGCCTGCAGAAGCTCCCCGCCAGCAACAACAAGTTCAC
circ_000985	chr7	155006225	155006612	+	Zm00001eb321400	155006225-155006271,155006347-155006447,155006525-155006612,	3	exon	236	CG-AG	CTAAATAGTGAATGCATAGGGTGTCCTGACCATCATATCTTGGAGTTTGGGTCCGAGAGAGTTGAACACAATGATATAGAGTAAGTGGCCAATGAAGTAAAACAGCAACAGGTGAATGCAGGGGAAGGGATCTCCACTGATAATATGCTTCCCAGCTTGCCAGGGCCGAAGACACAGGATTTTTAGGCTCTGCACAAGGGCAGAGGGAGCTTTGCAAGTTCCATTCAGCTTCTACG
circ_000986	chr7	122860650	122861404	-	Zm00001eb313310	122860650-122860655,122861243-122861404,	2	exon	168	AG-AG	CTGAACCATGTTGGGTGACAAGTGCTGAGATCCGTGATAACAGTTGCGAATGGGATCTTATCCAAGAGACCTTTCGATCTTAGAATTCGGAGGGGGACATGTTGCATTAAAGGGTGTACACTGATAATTACATCTGGTTGGTACTTCATTAGACCTTTTGCCACTTCT
circ_000987	chr7	156630369	156631241	+	n/a	156630369-156630470,156631236-156631241,	2	intergenic	108	TA-AG	CTCAGACTTAAGAGGAGGATTGAGGCATTCCAAGTGGTAAACACGAGGACAGCTATCACAACATAGCAAATTGCCACCAAGATCACATTCTACGCACTCGAAAAAATA
circ_000988	chr8	16428311	16431980	+	Zm00001eb336250	16428311-16428439,16431257-16431341,16431610-16431690,16431901-16431980,	4	exon	375	GT-AG	CTTTGTTGACCAATTGTATTATTCCAGCCAATGGTTTAGATGAAAGCATCGACATAAAATTCTTTTCTCGTGCATTATATCTTGAACATTTCGCTGAAAAGGCCTTCTAAAGGGTTCTGGCGTTGTATATTGTAAAATTTTGCAGCTATTTCATCCAGTAACTCCTGAAACACAGCATCACGATCTGTACTTGTCTTATACTTCTGTCGAAGTGTTCTAAAAAGAGGGTAAGCATCTCTCTCAAGTGTTGGTAAAAGATACTTGATGAACTGAATCAAATCTGTTTTCGGAAATTCCGAGTTAGCAGATTTTAGTTGTTCGTTCATCTCATCCATAAGTAAATTTGCATCTCTCAAGTTCCCTTGAGATAGGTAC
circ_000989	chr8	112066244	112066430	-	Zm00001eb350120,Zm00001eb350130	112066244-112066430,	1	exon	187	GG-AG	CTCCACACACACACAACACACAGGTACACTACACAGACGCTATGTACATCTAGACACCTCATGCATGGTCTGGTCGCATACCATGTCTCCTTTGATCCTTTTGTGTTTTACTGGCCATCCCTTCTACCTCCCCACTGGCATGCCATCATCTGAAACCCCACAACAAATCAACCTTTCCCTGCCTCCC
circ_000990	chr8	177570873	177571455	+	Zm00001eb369140	177570873-177571008,177571090-177571174,177571285-177571455,	3	exon	392	GT-AT	ATTGTGATCGCACCAATGACTGGCTTGATCGGACGTTTTCAAAGAGTACACTATAATTGCATCGATGTCCAGCTTGATCAACCAGTATCTCAATATATCCCAGTCGAACTTTTTCAGTGAGACGCCATCGCAACGGAGATCCACGCCTTGTACATCCCATGGGGTTTTTGCGAGTGAATATTTTGGGGATCAATGTCATTAAATAAATTGCTAAAAAAGCGGAATCCATCTGGACTAACATCTCTGCACAACAGGCCTTTGTTTTCTGCATTTAGAAGATGCTCCTTTGCTAAAGCTGGAGCAATTCCCAGTGTGAATGCAGCATCACTTGGGCTAATCCCTTTCTGAAGAGCATCTGGCTTCTGTGCAAGTGATGAGATTCTTGCAAATAC
circ_000991	chr8	122775454	122775819	+	Zm00001eb352390	122775454-122775819,	1	exon	366	GG-AG	CTCCCCACCTCTCCCTCCATGACGCCACAGCTCTACACCTCCTCCGTCGTCCCCATCGGCGCGCTATACGCGATGTCGCTCTGGTTCTCCAACTCCGCATACATCTACCTGTCTGTGTCATTTATCCAGATGCTCAAGGCGCTTATGCCCGTCGCCGTCTACTCCATCGGCGTCCTATTCAATAAGGAGACCTTCAGGTCCTCCTCCATGCTGAACATGCTCTCCATCTCCTTCGGCGTGGCCATCGCCGCCTACGGCGAGGCGCGCTTCGACGTGCGCGGGGTCGCGCTGCAGCTCGCTGCCGTCGCCTTCGAGGCCACGCGGCTCGTGCTCATCCAGATCCTGCTCACATCTAAGGGCATCTCC
circ_000992	chr8	123220871	123220992	+	n/a	123220871-123220992,	1	intergenic	122	AT-AG	CTGTCCCCCTGTCTTCCCCTTTGCCCCTTCGTCGCCGCAGCACGTTTGCGTTTTCCAATTCTTCCTTGTCTATACTCTCTCCGTCTCGACTTCGAGCTGGGTCGGTTTCGACTTCGGCTGAT
circ_000993	chr8	135300587	135300852	+	Zm00001eb355140	135300587-135300852,	1	exon	266	GT-AG	CTTCACTTCACTTCGCACCGGACCACCGGCCGTATTCATTCCTCCTCCCTCCCTCCTCGCCATACGGCTGCAGCATCTTCCCCTCACCCTCCTCATTACCCCGCGTCTCTCCCTCAAAACTACTCATTGCTCTCACCGTTCCATTGCCCCCGCGGCCCCGCCGTACGCTCATTCCCGGCTAGCTCCTCCTCCGCACGGCCATGATCTTGAGTTCTTGGCATTGATGACGTTCTAGTACCGAGCGAGCCAGCCCCTCTTTAACCCAC
circ_000994	chr8	134011368	134011573	-	Zm00001eb354820	134011368-134011573,	1	exon	206	GT-AG	CTCCTCTCCACCTCCTCGTCCTCGATCCCCAAGCAGTCAGTCTTCCTCTTCCCTCCCCTCCTCCCGTTAGGTAGGCTGGCGAGCCGCCGGCCGCCGTCCCTTCCTCCCTGGATTTGATTGGTGCTCGCGGCTGCGGCCCAGCGAGTTCCTTGATTCGGCGGGGAGCACCGCCATCGCCATGGGAGGGCGCCGCTGGCTGTCGTGAC
circ_000995	chr8	154117094	154117633	-	Zm00001eb360130	154117094-154117343,154117628-154117633,	2	exon	256	GT-GG	CCTTCAACTTCAACTTTATCAGACAATCCATAAAGTGGGCTGTTGGGCTCAAGAGGAGAATCACAAGAGTCATTTTCAGCTGAGTCGCTTTCACCCGCAGCAGATATGTGCGATATAAATATAGCCTTAGCTGAAAACGGAATCAGCTGGCCTGGAAATCGCATAAGATCCACAAGAAGCACCATAGAGTTTAGTGAAACTACCACAGACATATGTTTGTAAGAGTCCACAAATCCAACAGCACCGTCATAAAGAC
circ_000996	chr8	60211168	60212332	+	Zm00001eb342010	60211168-60211173,60212228-60212332,	2	intergenic-genetic	111	GC-AG	CTGAAGAGCAGCTGAACCCACTCGCCACGTATCTATTTGCCATTTTACTTCAGTCCCCGCCTTTGTTACTCGTTCTCTTTCATTTGGGCAACTAGCAACATGATCGTGTGC
circ_000997	chr8	123218897	123219183	+	n/a	123218897-123219183,	1	intergenic	287	GG-AG	CTAGATGCAAAAGGAAAGGTCCCTTGGTTATGAATAGATCGGTTGAAGGGTGGAGGTTTGCTTACGTTCCTTGGTTTTGATCTGCTATATGGCTATTTTATGTTAGCGAGTTTGATCCTGCTTCTGCTTGTGCAATCAGAACTTTGGAATTGTTCAGAGTTCCTTGTGTTTGTTCACTAACTATCCTCCTGTCGATGTTTTTTGAAAATTGACTTCACACATAGGCTCCCTTAATGCTTCGTTAGTGTCTGCAGTTTTGGGAGATGCCACTCCAGAGTTGGTCCCCC
circ_000998	chr9	21100828	21101208	-	Zm00001eb376880	21100828-21100833,21101094-21101208,	2	exon	121	CT-AG	CTGTGACTTGTAGTATATAAGGCCGCCGGATTTGTTAATGATGAAAAGGTTATAGATAGCTGCTAGTGCCATAGCCACGAAAGAAGGTGGAGTATAGATAAAAGTAATCTTCCTGTATCAG
circ_000999	chr9	159199639	159199833	-	Zm00001eb403210	159199639-159199833,	1	exon	195	GT-AG	CTCCACCGCCTCCACCATTTGTTAGCCCCGCTACTCCTCAGACACCACCTTATGGACCACCTATGGGCTTCCATGGTATGTCCTTGTGCATGTGGTTTATGAGACCATGGCCATGTGCCATTGTTATATTACATTAATTTGCTTGTTGTAAATAGCAGACATGTCAGCGCATGTTTACTATTTCCCGGCACCCAC
circ_001000	chr9	144685486	144686196	+	Zm00001eb397240	144685486-144685647,144685751-144685884,144686191-144686196,	3	exon	302	TT-AA	TTGAGTACTGTGGCATCGCCTCCAAACATGCTGCCAAAGGTTCTTAAGCTCATTCTTACGTAGTGGTTTTACCAAGAAATCAACTGCTCCCTTCGACAAACACTTAAACACCATACTCATAGAATCATTCGTAGACATCATAATCACAGGAATGTCTTTGCAAATTTTGTGACTTGTGATTTTGCTAAGCAGACCGATACCAGATAGACAAGGCATGAAAACCTCAGTCAATACAAGGTCGATGTTGTTCTGCAGATCTTCAAGATATCGCCATGCATGCAAACCATTTTCAGCAGGAATAA
circ_001001	chr9	100745264	100745499	+	Zm00001eb387250	100745264-100745499,	1	exon	236	GC-CA	TGTCGAGGTCGGGAATGCCCGAGGAGACGAAAGAAGCACCGTTCGGGCCAATCTTAACGCCAGCAGAGCCGGATGAGGACGCCACCAGTTTAGATGTGGCGCGGGAGAAGCTGCTCCGGCCAAGGGTTCGGCCACCGGCGGCGGACATGATGGCGGCTGCGATGGATTCTTGGAGAGGTTTCGGATTCGTTTCTTCTTTGTCGTCCTTGGCCCTACTTGCGGTAGACGCGTAGGGC
circ_001002	chr9	61033240	61035358	+	Zm00001eb382730	61033240-61033245,61035156-61035358,	2	exon	209	CT-AG	CTTTCTATGTCATAGACTCGAATTGTACCATCATAAATCTCTCCAATAGCATCACCAACAGCTAGCTTTGTCATTGACTCATTGAGAGCAACCATCGGAAATACACGTGCCATTTCTCTTAGAGCCATCATTGAACTGATAATACAAGCTTTTCGCATTATTAGATTGCTTGGATCCATAGTGTGTAGAATGTAGTTGATTGCCAAAAG
circ_001003	chr10	2924324	2985391	-	Zm00001eb405880	2924324-2924329,2985275-2985391,	2	exon	123	AA-AG	CTCAATCTTCTCATTTATTTCAAAGTGGCAACTCTAAGGAAGCCAGATCGATTTTGGTGGAAAGCTCTTCCAACGAACGTGCGAAATCTTTGGCCAGCTTTCTCCATCAGGTTCTTGGCAATT
circ_001004	chr10	108343479	108358670	-	Zm00001eb420520,Zm00001eb420530	108343479-108343599,108343706-108343786,108358665-108358670,	3	exon	208	AT-TG	CAGAAGTTATGAGGTTACAGAGAAGTCCAATCTGAATTGCTGTATTTTGCTTATCACCGGTTAGCATCCACACATTAATTCCAGCATTCCTCAACAATTTAATGGTTTCAGGAACACCATCCTGAAGACGATCCTCTATAGCAGTAACACCAAGAATTTGAAGGTCTTGCTCTAAGCTATTACAAACTTCAGCAATTTTAAATGACAT
circ_001005	chr10	81059618	81059728	+	Zm00001eb416050	81059618-81059728,	1	exon	111	TC-AG	CTGTAGCTTGGAGAAGTCTGGCTGTATGGACTCATCCTGGGGCTGCTTGGAGAGTATGCATGTGAAGGGCTGTACTTGGCTGATGAAGGATTGTAGCTCGGAGATGTAGGA
circ_001006	chr10	151638254	151642088	+	Zm00001eb434450	151638254-151638320,151641570-151641644,151641756-151641827,151642083-151642088,	4	exon	220	GT-AG	CTGTGCCTGATTTAATTCTGCTCCAACAGCATCAGCCAGGGTACCGAGGGCGTCATAGAGTATCCGGAGATTTCGTCTCTGGTATTTTCTATAGGCACACATGAGGTGCTGCAAAATTACTTCCAAATGGGGTACTAATTCTTCAGAAGCTTCCGGGATTAAGTGCGGCAAGAACTCCTGTAAACCTTCAGGAGGCATGCTCACATCACAGTATGCAGAC
circ_001007	chr10	115553053	115553252	+	n/a	115553053-115553252,	1	intergenic	200	CG-AA	TTTTCAGATACTTCGATGTGGCATGGCAAGCTTTTAGGAGCTACTATCGTCTACTGGAAGTCTAGAACACCCTGTAATTTACAAAGTAAGCTGCCCAATGATTACCATGATCAGGAATTCATCCCAAGAGAAAACAGACAAACCATGATTTTTAGCTTCGTCTTTATGGTAATTTCTGACTCCTCCAATGCTTATGGCCG
circ_001008	chr10	107150787	107151301	+	Zm00001eb420350	107150787-107150855,107150955-107151098,107151227-107151301,	3	exon	288	GT-AG	CTGTTTTTTACTTTTTAACACAAAAAGTGAGCTTTCAGGAGAGAGCACAGGATCAAAATCGTTTTGAATCTTAAGATGAGCATGGACAAGATGTGGTTCAATGTATTGCTGAAACAGTGGAAACACAGTGGTCATGATTTCAGTCTGAGAAATAGAAAAGCCAGCACGATTCTTGTCTCTCTGTATTCTTGCAATAAGGTGTGAATGAACTCCACCAACAACTGCAATCCACAAATCCAGAAATTTCCTTATAGCAGGATGTAAAGTGTACACACCTTCAAAGATGAC
circ_001009	chr10	66728735	66741874	-	Zm00001eb413950	66728735-66728816,66729535-66729663,66741527-66741608,66741832-66741874,	4	exon	336	GT-AT	ATTTTTCTTCTGCTAAGGCTTCTTTTGCCAATCTCACGACAGCAGGTACCTTTGCAGACATACACATATGCCTAAAGAAACGCTGATGACTTGCCCAGTATAGCCGCCAAATTTGAGCTGAATTGACTTTATCTTCTGCATAATATTCAATGGCTGATAGGAGTTCAACACGCAGTTCAACCCAAAGTGCAGCTGCCTTTCTATACATATTCATCATTCTTTCCTCCAGAAGTGATTCTAGGATATCAAAGTTAGCACCCTTGTAACTTAGAGTACGGCAAACATACATTCCCCTGGCTTTCATGTCCATAGCAACAAGTTCAAGAGCACCCACAC
circ_001010	chr10	34814299	34814630	-	Zm00001eb411380	34814299-34814630,	1	exon	332	GT-TG	CAAACTACTCACCTGTGCTCAACACTGACGACGCCTACGCCAGTCAAGAAGGTAAGAAACTATATACAGTTGAACGCACCATTAATTTTTTTGACATTCTCATATTAATCGTGCACTTTTATTCTTCTGTCATCCAGTTAACGGGCCTGACGGGAAGCCCATTGGTCCTCCTGTATGTATATTTTGATTTTTTTTATTGTAATATGCACATTGGTAACTAGTGAATAATATTTACTACACTAATTTACAGATGGGAAATCCATGGATCTACATGTACCCTGAGGGCTTGAAGGATCTCCTTATGATAATGAAGAACAAATACGGAAACCCAC
circ_001011	chr10	2924324	2985531	-	Zm00001eb405880	2924324-2924403,2985526-2985531,	2	exon	86	AG-AG	CTCAATCGCCGTGGAATCCTCAAGATCCAATCAGCAACAACAAGTTTCCTGCGGCAATCAACAGATGTGTGCAAGAGGGCGGGACT
circ_001012	chr10	147426188	147426396	-	Zm00001eb432070	147426188-147426396,	1	exon	209	AG-GG	CCCTCCTCCTCCCCTGTCTTTCTCCCTCTCCCTCTTGACAAAATTTCCTCCACCCATTCTCTTCCTCCTCTTCTTCCCCACCGACTCCACCGATCCACCTCTTTCTATCTGAATTTCCTCTCGTCTTGCCCACCGCTCCATCTGTCTGTTGCCTCTCTCTCTCGCAACCAATCGGTTCTTGTTTCCTCCGTCTGCTGGGTTGATTCTCT
circ_001013	chr1	5365465	5365683	-	Zm00001eb001810	5365465-5365683,	1	exon	219	GA-AG	CTCCCCGCCCCCCACCGCCATGGCTCCCCCACCAACCTCGCGCTGCCTCGCCCTCGCTCTCATCCTCATCGGCGCCCTCTGCGCCGCCGCCGCCGCCGCGCGGTTCGCCCCGGCGGACAACCACCTCCTTGCGTGCGGCGCGGCGGCGCCCGCCGTCCTCCCCGACGGCCGCCGCTTCGTGCCGGACTCTGGCTGCGCATCCACCCGCCTCCGGTCATC
circ_001014	chr1	73019511	73019854	+	n/a	73019511-73019854,	1	intergenic	344	GG-AG	CTATTTTATATGAGACCATAACTCTTCAAAGCTTAGCTGCAGTGTAGAAGATGCTTGAAGTACGACACAAATAGTTTTAAAGAAGTCAGCAACCAATAATTACTATTAAAATAAAAAACATCAGAAAATGTTACCTCTTGAGCATGATATCATTCTAATTTGGAAGTGAAAAGGTTTTAAAGATACCTGAATGTACCAATTCATTTTGTTAGTTGTATCATAGGAAGGAATCGAGGGTAAGATAAACCAGATTTCTTCTTTGCAAAACATTCGTCGAATGAGTAGAAAGCAGCGGCGGTGGCAATCTAATCACAAAGATGAACCTCTATTCACAATGCAGAACC
circ_001015	chr1	54899360	54899448	+	Zm00001eb015840	54899360-54899448,	1	exon-intron	89	GC-AG	CTTCCATCCTCCGCGCAGCCACTCATCCCGCAGCCGCGATCCCCGCGGCGCTCACCTTCCATCCCGCAGCGCGCACCTTCATCCTCCGC
circ_001016	chr1	71609534	71611184	+	Zm00001eb019650	71609534-71609649,71611024-71611184,	2	exon	277	GA-AG	CTCCTCTTTCTCCGCCCACCTCCACCCCCTTCCCTGCTCTCTCCCACTACTGCCCCCTTTCGCCGTCTCCCTTCTCCCATCCCTTCCGCCGTTTCTGCCTGCTGCGAACCCGGCGGCAACCGACCTCGATCGTCGCCGTTCGTCCGCCGACCACCGCCAAGAGGCAGAGTTGATATGGCCCTCAAGACCCCGCACCTCCCATCCAATTTCGCGAGGCGGCCAAGCAGCCACCACAGCTTCAGCCAGTGGCACTCGCCTCCGCACCACCCAAAGCTTC
circ_001017	chr1	104947996	104948402	-	Zm00001eb024960	104947996-104948096,104948266-104948402,	2	exon	238	CT-AC	GTAGAAGGCGACGACGACACCGGCGGTGTGATGGTCGGGCAGCTTGATGGAAGCGCTGAAGAATCCATGGTGGTAAGACGATCGGGACACGAACCCGGAGCCGGTGTGGCGGTCAAGTTTGAGGCGGACGGAGCGGCCGCCGGGCGACGGTACTAGGTTGCCGCCGCCGAACAGCGGCATGTAGCCGGCTTCGAACAACGTCACCGGCGACGACGCGGCCGCGAGAGCCGCCGCCCAG
circ_001018	chr1	160873383	160873537	-	Zm00001eb029580	160873383-160873537,	1	intron	155	GG-AG	CTGGGACACATCCGCCACGCCTTCTTCGAAGATAGTAATTGCGATGTTTCCACAACCACCAAGCCACTAAAATCACCACAGAATTGAACTCATTTCCCTGCGGTTTGGGGACTCTTCTCTCTGCTTGATTCCACCAATCCTGAAAATTGACCTCC
circ_001019	chr1	3220500	3220678	+	Zm00001eb000890	3220500-3220678,	1	exon-intron	179	GT-AG	CTTTAGTTCCGCAACTGATCGCTGGTGTTCCTGTTCCTTCAGCTTCAGCTCCAGCTCTTTGATCTACGAAAAAATAAAAGAAAAAAAAATATAAAACAAATCCAAACATGTTGACAAATCCCAATATTATCTCCCTTGTGAAGTAGAAATCAAATGAAGCACGACATTCAAGGAGTCAC
circ_001020	chr1	81006165	81007064	-	Zm00001eb021320	81006165-81006256,81006592-81007064,	2	exon	565	GT-AG	CTTCAGCAGTAACAGAACAAGACCTTTCTAGACAAACTGAACATAGATCATTATCATCAATCGAGGGTGTGGTATGCTGCAACCCAAATTCTCCAACAATCCAAGCTGAGCCAAGACCATATTTCAGTCGTTGCCTTAGTAAAAGTAACAATCTCTGGAAAAAATGCAGTTATAATAGAGATGTAAACTGCCCTAACTGTTCACAGATATTATTTCCACTAGAAATCTAGAATTCAGAATGAAATTGCCTTCATGGCCTCCTCCTTTACTTTCCAAAAAACATATATAGGCCATATGATAACACATCAAAAGTCTAGCATAGTGACATGCATTCATATATTGAAAGTCGTCAGTCTATGAAAGCAAGAAATTCAGTTATAGTATTTCCAGACGAAGAAA…
circ_001021	chr1	7299077	7299354	+	Zm00001eb002580,Zm00001eb002590	7299077-7299354,	1	exon	278	CT-AG	CTGGAAGCAGGCGCCGCAGCCGACGCCGGCGCGGTACAGCGCGGGGCTGGCGGCGGCGAGGAACCCGGCGCTGAAGGAGGCGGCATCGGTGCCGTACCCACAGGAGCCGCCTGCACGCACGCGATTCGAATTAATTAATTGGTAAAGAAGGAGGAGAAAGCGGTGGCGGCGTCGGCGTAGCGAAGGTACCCACCGGCGAGGGTCAGCGCGGAGGTGTAGTAGGCGGCCTTGGAGTGGCGCACGCAGCGGTCGCAGGCGGACGCGAGGAGGAGCTGGAG
circ_001022	chr1	274775919	274776112	-	Zm00001eb055080	274775919-274776112,	1	exon	194	AG-AG	CTTCTCCAGCTCCTCCTCACCGCCCCGCCCCTCATCCAGGCGCAGCTCTCCGAGGCCCTCGCCGCCGCGGCGGCCTCCGATTTCCCCGCCAGGTGGGAGTCGCTCCTCCCGTCTATTGTGTCCTCCCTAGGCAGTGCCGTCAACGCGGGGGACATCGCCGCCACCAACTCCCTCCTCACCGCCGTGGTGTCGCT
circ_001023	chr1	245051097	245053495	+	n/a	245051097-245051171,245051321-245051430,245052099-245052174,245053490-245053495,	4	intergenic	267	CA-AA	TTGCTGCTTCTGCAATCCTTCCACCTCCTTTACCGCTGATCTTCAGCAACTCTGCAAGCTTTCTTCCATGATTTTCAGAAACCTGAATGACGGGCATGTGAAGAATTGCACTTGATGAACTAACATGATTGGCACAATTTGCTACAGCATCAGGATGGCTTGATTTTTTTGAATTATCAGTATAAGGTTGTTCTGATGAACATATCAACTTTCTTTTTTCTGTTGATTTACTTCTGCTGAATGAAGGTTTCATCATACTAACTTGTG
circ_001024	chr1	282978999	282979241	-	Zm00001eb057250	282978999-282979241,	1	exon-intron	243	GA-AG	CTTCCCCCCTTCATAGCCTAGCCTCGTCACACGAGCAGTGCTGCCCTGCCGCCGCCGGTTCTCCGAAGAGCGCCGCCGGGGCATCGTGCCTGTACTTGCTTCATATAACCCTCCTGTTCGTCCTCGCCGGGCTCACGCATTTGTGGTTGTGGCGCAGCAGGGCTCCTCCACCGGTCCAGTTCCTCTGCTTCCGGTGATTGATTGGTTCGCTCTCATGGCCGCCCCCTCCTCATCCTCTTCCTC
circ_001025	chr1	262960987	262961575	-	Zm00001eb051870	262960987-262961105,262961570-262961575,	2	exon	125	GG-AA	TTGGGAAGTCTTGCGAATAGAAGATTTCTAAGCACGTCAAACATAACTTGAAACTGGCGAGAGGTCATCGTTGCAGTAATGTCTGGAGAGTTAAAGCGTAGCTCCTTCAGTGGTTTAACCCTTCC
circ_001026	chr1	34596829	34597111	-	Zm00001eb010810	34596829-34597111,	1	exon	283	GA-AG	CTCCTCCCCCTCGACGCCGACCTCCTCTTCCGCACAGCCTGGTCCGTTGCGCAGCCTGTCGCTCGCGGACTCGGAGCTGCTCCTCGCCCCTGTGATCTCGGCACTCGGCTCGGGCAGCGCCAAGCTCGCCGAGGCCGCGCTGGAGCTCCTTCACAGGCTGATCGCACACTCCTACATCCATGGCGAGGCCGACCCATCTGCTGATCCCTCAGCACAGCTCGTCGCCTCACTCCTGGACGCCGCCTGCAATGCGCTTGGCCTTGATGACGAGCACATTGAGCTC
circ_001027	chr1	27040590	27041162	-	Zm00001eb008790	27040590-27040595,27040818-27041162,	2	exon	351	AT-AG	CTAAACCTGATGTTCATGACGAAGAGGTGGAGCCCCGTCTTCCTCGGCCCGCAGGGCAGTAGCCCCGCCGCCGGCTCCGGCGGCGCGTCCCCCTGGATGACCGCCACACGCTTCTCGGCAGGCATGCTCGTCGCGGGAGCGGCGGCGGCGGCGGCGGCACCGTTGTCCTCCATGCTCCAAAACCAGGTGCTCAGCTAGCTAGACACGACGCTCCTTGCTTGCTTGCGCGCGCGCTCTCGCACCAGCGAGAGAGGGAGATGTCGGGGCAGCGGCGGAAGAAGACGCGCCCGTACTTATACGCCTCCCCGGCCGGCCCGTCGCGTGCGTTGCGGCGCTTGCTTGTTATCTGAT
circ_001028	chr1	5437241	5437917	+	Zm00001eb001870	5437241-5437246,5437604-5437726,5437817-5437917,	3	exon	230	GA-AG	CTCATTGACGAAACACCATTCACTGATAGATGTGTACCTCCATAGAGCCTGTGTAGCTTCAGAATAAAGTCGTACCATTTGAAATCTTGAAGAATAACAACCTCAAGGTTGCCACTAAACGGATCAGCTGTTGGAGTTATCTTCATACCACCACCGAAGTATTTGGCATTCCCTATGCACAGGGCTGTGACGTTATGAACAGTTCTCCATTCTCCCCCATTTACTTACTC
circ_001029	chr1	10459592	10499622	+	Zm00001eb003810	10459592-10459651,10459937-10460032,10460804-10460841,10486268-10486401,10499311-10499383,10499617-10499622,	6	exon	407	GT-AT	ATAAAAAGCATTCAGAACCTCTTGGCGTGAGTGTGTGTCAGTAAGAGAAATAGCAGATGAGAGCAAAGATTGAGTTGTCCTCGAGACATCAGCTTCACGTAGCTCCTTGCCTCTTCTGATAATAAACATGATAATAGCTTGAATTGAAGCATCTGCTGACTGTTTTATCTTATCACATGTTGCCAACGTACAAGAGTGTAGCAAGACGACCAGTCAGTATCATTCACAACATCCAAACATTCTGCCAAAAAATTTATTATCATGTCATCCCATTTTTCCTGGTATGTGCTATCTTGCTTTAGGTCTTCAGGATCACTGATGTAAGCTTTCATCTTAGGGACCTAATACTCATCTTGCCAAAATAAAGAAAGGTTTCTGGGGAAAAGTGGACCCAAGTAG…
circ_001030	chr1	252534395	252535420	-	n/a	252534395-252534511,252535157-252535216,252535344-252535420,	3	intergenic	254	TA-AG	CTGAAAGGGCAACAAATGTTCAAGGTGGACAAACCTCCACAACAACCTCAAAGAAGCTTCAGTTGAACCATAAGCAAGCATATAGTTCATCCCCATGAGTATCCTTCACTGTAAAGACTGTTCATGGAGAATATGGAATGATTGCTTCATAGGTAAATTAATGTCTAAGGCAATAACAAGTAGCATATTAGTTCCTTTATCCTTCCTCTTAAAATGAGTCGAAGAGAAATATGTTGCCTGAGTGCCTATACATA
circ_001031	chr1	170281123	170282491	+	Zm00001eb030660	170281123-170281128,170282239-170282304,170282423-170282491,	3	exon-intron	141	GA-AG	CTGCTGAGGCTTAGGTGAGGAACAAAGTGTTCATAACCATACCAGATTGACTATTTGCAAAAGCAAACTTTTATAAACCAGGAGCTCATTGACATTGAGGGCAAAATACAACCATGTTGTGGAGGAAGAATGATAAATTTC
circ_001032	chr1	112826981	112827144	-	Zm00001eb025760	112826981-112827144,	1	exon	164	GT-AG	CTCACCAGAGAAATCCTCCTCCTCCCTAGTCCCTAGCCAATTCTTTTTTGTATCAAACCCTCTTTCCCCATCTCAGATCCCTCTCCCGTCCCAGCTCGATCCTGCCTGATGGCCGCCGTACCGTACGCCGCTGCTGCCGGACGCTGAACGACCAGGACAACCAC
circ_001033	chr1	78317551	78326503	-	Zm00001eb020860	78317551-78317664,78317781-78317948,78326335-78326503,	3	exon	451	GG-TG	CATAAGTGCTTGATTTTTTGGATCAATTTTCTCAAAGAATACTCTCCTGTGCAGCTTTTGTTGTTCTATATGCGGATTTTTTGCCAAAACTTTCCTCATGTCAGCAACTATAGTCCCAATTTTTCCAGCATCCATGTGGCTAATAGCAAGATAGGTCTTAATACGCCAATGGGTCCTCTGAGTGTTATTCCTTAATATAGAAACTGTAAACTTATGGTTAGGAATGTATATCGCTTCTCGATCAACACCTCTAATGAGTGTTGGAGACCACAAACCAACATGCCTAAATTTGTTCCTTTGGCAAAAGATGTCAGTAGCAGTTACTCTTTGGAACAGCTGAGATGTCAATCCAACTGCCATCTCAACCAAAACTCAAATCCAATGAAATTTACATCCACT…
circ_001034	chr1	233711981	233712099	+	Zm00001eb044830	233711981-233712099,	1	exon	119	GA-AG	CTCCTCCTCCTCGCCCCGCTCCCTTCTCCTCCCCGCCTTTCGCATCTCATCCACACCCGCAGACTCTACGCACTCGCCCCCGCCCGCCGCCCTGCGGCCGCGCGCGCGCGCCGCGAATC
circ_001035	chr1	195331929	195332105	-	Zm00001eb035750	195331929-195332105,	1	exon	177	AT-AG	CTTGGCGATATCCACACTCTGGGTGCTGAAGGCACCACATCAACAGTATTCTCCTGAGCATGGCCTGGCAACTAGGCGTTTGAAAGTAACTACCATCTTCTGGATATAATCGAGACAGGTCTTGGTCAACTGTCTTCTCCAACTCAGCCCCTCTAAAGAAGCGGCCCCAGCTGCTAT
circ_001036	chr1	277233378	277233485	-	Zm00001eb055770	277233378-277233485,	1	exon	108	AA-AG	CTTCTGAATTGTCTTCTTAAAGCAGGTCTTGTGCTCATCCATAGAGGCATGAATGAACTCATCCATGTGGTCTTTCAGATCTTCAAGGAAGGTAGCATCATCTGTTTT
circ_001037	chr1	269203407	269203783	-	Zm00001eb053610	269203407-269203476,269203599-269203783,	2	exon	255	GA-AG	CTCTTGCAGGACCACGAGTACATCGCGGCCATGCCCTTGCCGCGCACCATGTTCAGGTGATTAATCACATCTCTGAGATAGAGCCCCTCCGGCGAGGCCAGCGGCACCTCGACGAAGTGCGGGTGCTCGAGGTGGCGGCTCCGGGTGAGGTAGTACACCACCGGCACCTTCCGCGCCGCCGGCCTCCGGCGCTCGGGGCTCCGCGGCCGCCGCCCCCGGCTCTCCATCCTCGCCCAACCTGAGTTTCACACGCTC
circ_001038	chr1	259848299	259848531	+	Zm00001eb051090	259848299-259848531,	1	intron	233	AC-AG	CTGTAATCCCAGTTAGAAGCTCGCGTTCAGTAAAGTACACAACGATAGAACAAATGGTCGCCGAGCTTGACATTGTCATTTACATTGCCCAAGGACATAGGACCTTATCCAAATGCTACCGTAATGAACTTGAAGAAGCAGCTGGTCGACCACGAATACAGAGAAAAAAAAACTTGAAAACGGGACTGTTGTGGCAAATGATATCATTAGTTGAGCCAAAATTAAGAAAAGGT
circ_001039	chr2	19529280	19537416	+	Zm00001eb074180,Zm00001eb074190,Zm00001eb074200	19529280-19529285,19537328-19537416,	2	intergenic-genetic	95	CC-AG	CTGTGTTTTGAAGATAGTTTTACACCCCTTCTTTGGTAAATCGTCTGACCCTCAAAACCTAAGGAGGCATTTCTTGTCTGCACGGCCACCAAAGG
circ_001040	chr2	213753932	213754089	-	Zm00001eb107550	213753932-213754089,	1	exon	158	GT-AG	CTACCTGAAGAAGATGAGGAGACTGCACCAAAGCAATTCCAAGACGAGGAGCAGAAGGGACTTCAACAACACCAAGAGCCGGATGAGCAGGCATCGCAACCTGAAGAGCAGAAGTCTCAGCAGGAATGCCATCAGAAGGCACCGGAGCAATTCCAAAC
circ_001041	chr2	52407560	52408123	+	Zm00001eb082690	52407560-52407658,52407741-52407878,52408053-52408123,	3	exon	308	AT-AG	CTGATCATGTGCATCACAGTACTATTCAAGTAGAATGAATGGCAAAACTGACGAGCAGATTTATCACCATTCTGTAGCAGTATGCGGGACCATTTGTCGTATGCAATTACCATTAGCAGGTGATCGGATTGTTTATTATCTGTTACAGAACTAGATCCATCAAGGTTCTCATTCAATAATGTGGCTTTTGCTTTCTCCACATTTTGCTTCTCATCTTTTGGAGAGAGAAATGGAGATTTATAACTCAGGAAAGCAGCAACGGACAGAATTGGTGATAAACAACCAAAGATAGCACCATAAAGCATCAT
circ_001042	chr2	768601	768741	-	Zm00001eb065650	768601-768741,	1	exon	141	GG-TG	CACTTCTCCTTCCCGCCTCTCCTCTCTGCTGCCGCCTCCTCCACCTCTCCGCGGCTCCACTTCCGCTCCGCGCTCGCTCTCCACGGGCAGCTCCTCCGCCGCGGCCTCCTCTTCTCTTCGCCGCCCCACGCCGCCAACGCC
circ_001043	chr2	37653626	37653724	-	Zm00001eb079150	37653626-37653724,	1	intron	99	GT-AG	CTGAAGCGGCAGGCGTCGAGCTCCAGGGCGACGGAGAGGCGAAGGCGAACCCCGGTTGCGCACCAGCGAACATGGCCGCCGGGGGACGAGCCTCAGAAC
circ_001044	chr2	74116751	74116969	+	Zm00001eb085570	74116751-74116969,	1	exon	219	GT-TG	CACCCCCAGCAGCTCCAATCCCTCCACCAGGCACTGCTCCATCAAGTGATGGAGCTCAGAACTATCCACCTGGTGTAACACCACCAAGTTCTGGCTCATCCACTCACCCTGTTGCAACATCAGTATATGCATCATCTGGTGCACCAAATGCACCATCGATATACCCTCCACCACCTTATAGTTATTCCTCATACTACCCTCCACCATTTCAGCCACCAC
circ_001045	chr2	13207977	13208340	+	Zm00001eb072010	13207977-13208340,	1	exon	364	GT-CG	CGGTACATCACAGGCACACATCGCCTGCTTGTTCTTATTACAGGCACGAGCATCACGTTGCTACTATCACAACCAGTCCTGATGCACGCCATGCCTGATACGACTGTATTATAGTAGAACCAGTATTATACTGGTATTAGCACAGCCACACACTGCTATCAAGCACCACTACTAGTAGTATAATATTGCAGTGATATAAGCAGGGAGCCCAGCCCGGCCGAGCACGAGCAGAGTGCCTGCCACTGCCAGGCTCTCCCGCCGCCCTTTTTATGAGCGAGCAGCAGTGTGGGCTGGCCTAGCAGCGCCGCGCGGCTCACGCGGCGGGGGGCGGCTTCTCGACGTCCTCGAGCGGGCGGAACCACAC
circ_001046	chr2	93169250	93169485	+	n/a	93169250-93169485,	1	intergenic	236	GT-TG	CATCAGTACAACCCACACCAAGCCTTCAACCGTTACCATCTCCTGCAGTAAGCCAGAGTACTCGTATTGATGTTCGTGAGATCAAGTCCAAGATTTTTAAGACGATTGGGCCTGAACGAGCAAAGAAATACTTTCAGCACCTGGAAAGGTTCTTATCTTCAAAACTGAGCAAGAATGAATTTGAGAAGCTTTGTCTTGTTGCACTTGGCCGTGATAACCTCCCATTGCACAACCAC
circ_001047	chr2	238222483	238222602	+	Zm00001eb116230	238222483-238222602,	1	exon	120	CG-GC	GCGTCCACCTCCCTCTACACGGCGCCGCTCAAGGACGGCCACCCGCTCGTCCTCGACCTCACTAGCCCGGTCATCTCGCTGGCCACGTGCGCCAGCTCCTCCAAGAACAACAACGGCACG
circ_001048	chr2	198555310	198555465	-	Zm00001eb102560	198555310-198555465,	1	exon	156	GT-AG	CTGTTAATACATCAAAAAATATAGCATTCCCCAGTTTAGTTGCCCACTCCGCCCCATTGGCACCAAATCCTGCATCTTTGACTCCCAAAGTTCAAGATCATTTTAGGACAAAACAAACGCTCCAAAGAACTGCTTCACCTTTACCAACTCCACCAC
circ_001049	chr2	206265918	206269784	+	Zm00001eb105070	206265918-206265923,206269179-206269225,206269388-206269495,206269779-206269784,	4	exon	167	GT-TG	CAAGCACCTCCTGTAGTCTTTGTAGTCTTTAGCATCTGAAAGAGGCTTTTCTTTTTGTTGCTAGTGCCCCAAAGTTCAGTATGGAGAGGGTCAATAATTTCCAATGTTTGAACACTAGTTGAGTCGATACTCATATGGTCAAATGACCCGTTGAATGTAACACCAAC
circ_001050	chr2	8988844	8989589	-	Zm00001eb070120	8988844-8988934,8989351-8989401,8989584-8989589,	3	exon	148	AT-AG	CTTGGAACTTCTGCATGCTAGCTTGATATGAATTCAAAAGCACAGGGCGAGGCCATCCTTGAAAACCAGAGGGTGTTCCATGCAATGGATCCTGAGGAACTGGGTGAACATAAACAACAGGACTGAACTTCCCAGTCATTGCCACGAT
circ_001051	chr2	17931167	17932788	+	Zm00001eb073730	17931167-17931172,17931742-17931859,17932616-17932788,	3	exon	297	GA-AA	TTGAAGAGTGTTGAGTTTCACACATAATTTGGGCACTGCCAAATTGTTCAACTTCATAGCAACCTTTTCTTCAGGAACCGTAGGCTCAATAAGTTTCCTCTTTGCAAATGGATTCATTGATTCTGCATAACGTGTCAAGACTGGAGCACTAGGGAGAAGAGTAGATCCAGGCACTTGTTGATTTTCCATGTGAAGCAAATAGACTTCAAGACTCCTAGTGATTCCGATGAGTAGACTTCGCAAGTGGACAATTTCCAGGGGCAGGCTCGTATTAAAGAACTGATCAACAGTCCAATC
circ_001052	chr2	238222273	238222494	+	Zm00001eb116230	238222273-238222494,	1	exon	222	CG-TT	AACAACGGCACGCTCACCGCCACGCTATCCGCCAACGCCACCGACGGCCAGAACCCGCTGTTCCCGGTCTCCTTCTCGGCGGTGGCCACGTGCGCGCCGTCGTCCAAGCTGCCCGCCGGCGCCGGCGCCGTCGGCGTCGCGGGGCTCGCGCCCTCCTCCAGCAGCCAGCAGTCGCTCCCGGCGCAGGTGGCGCGCACGCAGAAGGTCGCCGACAAGGTCGCG
circ_001053	chr2	137746161	137746329	-	Zm00001eb091470	137746161-137746329,	1	exon	169	GT-TC	GACCATCGACCGCGTGAAGCTGTTCGACGCGAACCCGGCCTTCCTCGACGCGTTCGCCGCCAACGCGCCCTCCATCGCCCTCGCCGTCTCCATCCCCAACTCCGCCCTCCCGTCCTTCGCCGACAGATCCACGGGCCTGGACGCGGCGCGCGGGTGGGTCCGCGACAAC
circ_001054	chr2	219316623	219318631	+	Zm00001eb109770	219316623-219316747,219318626-219318631,	2	exon	131	GT-AT	ATATCTCCCAAAGATGCCGACAGTTCTTCTGATGAAATAGAATGTGGATCAAGACCACGAGGAAGACGAACCCCACATATTGAATCATACGGACCATTGTAGCCGTCTTTCTTTTCTCCCTCTTTAATTAC
circ_001055	chr2	25384645	25384824	+	Zm00001eb075960	25384645-25384824,	1	intron	180	GT-GG	CCTCCTTAATACATTTGCCATTCAGGCAACGATCCTTCCAAAACAGAGTATCAGACCCATCTCCCAAATGAGTGATAACAGCCGCAGCCACCAAGCTTTGCACAATGTCGCAACTCGCAAGTTTGAATCTGAAAGTCCGACCATGGCTTAGTCCTATCAGATTTTTGCAGCCAAGGCCAC
circ_001056	chr2	10328977	10329889	+	n/a	10328977-10329048,10329136-10329207,10329315-10329389,10329512-10329583,10329673-10329738,10329824-10329889,	6	intergenic	423	GC-CT	AGTTGCAAATTATTTTGAGTAGTCCAAGAAGGAAAGTTGCCTGACAGCTGGTTGTAAGAAAAATCTAAATTTTTAAGAGAAGTTCCTATAGAGTTCGGCAGGCTTCCTGAAAGACTATTATCACCAAGAAATAAGAAGTTGAGTGAATTCAGATTCACAAGGGCTTCTGGAACTTGGCCTGTGATATTGTTAAAGCTCAAATCCAATAAGTTTAGATTTGCAAACTGTGAAAAGTTCACCGATGTCAGGCTATCAGATATCCTGCAATTCCTCAAAATTAATGCGTTCAAAGATGTTATGTTACTGATGAATGTCAGTGAAGAACTTCCATTTACTATGTCACCTATTTGTAAGTTTGTTAGTTGAACGAGATTAGAAAAAGTGGCTGGAAGTGGACCT…
circ_001057	chr2	31868119	31869154	+	Zm00001eb077900	31868119-31868274,31868364-31868426,31869149-31869154,	3	exon	225	GT-AG	CTCCATCTCAATACAATAGATAGCAGCATCTCGGACACTTTGGTTCGAATCATTCATCAATTGCAGGACAGGTGAAAGCAAAACCCGTTGCAAGGAAATCTCAGTAGAAGCAAATAGCCCAATTGCAGTTGCCACCGTACGTACAAACTCTTCCCGCACCCTCCAACTCTTATGAGTCCATGCATAACTACCAGCTCTTTCAACTATGATTGTTGGTGAAGAAAC
circ_001058	chr2	108888088	108892728	-	Zm00001eb088370	108888088-108888249,108892723-108892728,	2	exon	168	GA-AG	CTTTGTAACAGCTTTAGCAAATTGACTCGGCTGCACGTCATTATCCTCTGGGCCATTCCAGCCTTCCACAATTTGGGGTAATTTTCTAAGATTTGCAAGCAACCTCTCTCTCATTATCTGGACAAGTTTGTTGTGAATTTCATCTCGATGGATCTTGTAGTCTTTGTC
circ_001059	chr2	6051110	6051246	+	Zm00001eb068620	6051110-6051246,	1	exon	137	CA-TA	TAGAGTGCCTCGTGGCCCTCGGTCCACCTTGTACTATCGTACTGGGCATTCCTTCCAAAGGAAGCAAGGTTACACGCACAGCCAGAGCACTATTGTAAGGGGTAGTTACTCCCCCACAACCATGAACCCCCATGCTG
circ_001060	chr3	235780866	235781259	+	Zm00001eb163520	235780866-235780980,235781087-235781259,	2	exon	288	TT-AG	CTCATAGTTGGTGATAATGCCATTGTGGACAACCAAGAACTCATCACCGGCACCAGACGATTGGGGGTGGCTGTTCCTTGGAGCAGGCACACCGTGCGTGGCCCACCTGGTATGTGCGATCCCAGCATGCACACTGAACGCAGCATCCAGGTTCACATCCTTCTCATCAACCTCACCAAAAGTGCCATGGAAACTTGTATACGATTTCTGACGAATGGCATAAATGGAAGAAGCCTACTTGATATGCATGGCCCAATTCTACGTCCAGGATTTGCTAAGAGCTACAAA
circ_001061	chr3	205010304	205014805	+	Zm00001eb153830	205010304-205010462,205014800-205014805,	2	exon	165	AA-TG	CATTTGCTGATTAATTCCACGATCTTGAATGTTGTCAACAATCTTTTTGGTATCATGGCCACCTCGTGATGTTCCAAGAACTGTACCACCTCGTTTGTGGATATCATTCACACTCTTTGGTGTCATGGGAAGATAATTGCTCGAATAGAACCCCTTGTACCCATT
circ_001062	chr3	1465264	1465461	-	Zm00001eb118850,Zm00001eb118860	1465264-1465461,	1	exon	198	GT-GG	CCCCCCCACCCCACAAATCTATCTATTCTCTAGCCAGGCCATCTCCATTGCTCGATTCGATTGACACACTCACATATAACTGATGCAGGGCTCAAGAATCTTTACGTTGTGTTGGCTGTAGCTCAAGCAAGCGTACCAGTATACTGCGTTATTATCTCCATGATGAATAAAATAATGAATGAATCGATCAATGTATAC
circ_001063	chr3	126376837	126377055	+	Zm00001eb136230	126376837-126377055,	1	exon	219	GT-AG	CTCCACCTCCTCCTCCTCCACAACCACCACCTTGTCATGCAACAGTTATACCTTCTTTGTGTTTATCTTCAAAACCACCTTCTCCAACAGAACATTACGAAAATCCACCTTCTTCCCCTCCACCTTTTTCTAGAGAATCATGTGTTGTTCTACCTCCACTTCCAGCTCCACTCTTGAATCATCCATCTCTTCCTGGAAAACATATTAATCTATATCCAC
circ_001064	chr3	173098128	173098184	+	Zm00001eb144910	173098128-173098184,	1	exon	57	AA-CC	GGACGCAGAGGTGGGGGAGAGGAGAGAGCAGAGGAGGTGGGCGCGTGTGGGGAATTT
circ_001065	chr3	176620293	176620468	+	Zm00001eb145800	176620293-176620468,	1	exon	176	GT-AG	CTCCTCTTCCCCCTCTTCCTCCACCTCCACCTCCGCGGCCGCCGACTACCACTGCCGCACCAAGCACAGTCCCACCGCCGGTTACGCGCGCGGTCCGGGCCGCCTCGACTGGGCCAACCAGCCCAACCCCTTCCTCCGTTTCTCCCCCGCACCGCCATTACCGCTCCCCAACCCAC
circ_001066	chr3	196786177	196788125	+	Zm00001eb151640	196786177-196786245,196788120-196788125,	2	exon	75	GT-GA	TCAAGATTTTTTCATTGAATGTAGTTCCCGTCCAAATGGCTCTAGGAACTTCATATCTATATCAACGGGCCAGAC
circ_001067	chr3	64556846	64557004	-	Zm00001eb131320	64556846-64557004,	1	exon	159	GA-AG	CTCCACCTCCAAGTAGCTCCTCAAATGACAATGACAATATGAAATCTGTTCTCTCTCTTGATGATGGTCGATGGTCTGTACCAGCAGAAGAACACACTCCACTTCCTTCTGCTAATTTGGAAGAGGAGTTGTTCCAATTGAATATCAAACAACCTTCTC
circ_001068	chr3	144011370	144011978	+	Zm00001eb139400	144011370-144011432,144011506-144011595,144011973-144011978,	3	exon	159	GT-AG	CTTTTCATTCTTCTCAGCAGCAGCAAGACAAATCACATAATCAGAATGCTGGCGGAAAGTCCTGGTACAAGCACCATCGGAGAAGCAATTCCAGACCTTTATTGTGGTGTCTGAGGAACAGGAAACAAGCTTTTCTCCAACTATAATGGCATCATTAAC
circ_001069	chr3	214296078	214296368	+	Zm00001eb156720,Zm00001eb156730	214296078-214296368,	1	exon	291	CA-AG	CTCGCCCATCACAACCAACTCCGCTCTCCAATGCCCACCACCACCACCACCACCACCACCACTACCCCGGCCCCACTCCTCGACATGCCGGAGCCTTGGACGGACGCCACGGCCAATGATGGCGCGGCGAGTCGTCGTCGTCGTCGTCGGCTGCTGCTGCTGTGCGCCAACTACGCCGCGCTTCTCGGTGGCTCCGTGGCGTCCAGCCTGCTGTCCCGGTACTACTTCGCGCACGGCGGGCGCGATCGGTGGGTGGCCACGCTGGTGCAGTCGGTCGGGTTCCCAGTCCTG
circ_001070	chr3	58671627	58672033	+	Zm00001eb130790	58671627-58672033,	1	exon	407	GT-CG	CGTTGCCCATCCATCATCTCCCTCTCGCTCTCGTTTATGCTCTTGCCTGCATTCTTTTTCACAGTAGGCATGCAGTACTACTTTTGGTTCTCTTTGCAATATATATACTGCAGGTTTGCTAATCGCTAAGAGCCTAAGAATCTTCCGCCTGGAGTGGACTGTACTTTCAGGAAAAATCGTTCTAAAATATCCGGTCTGCATCTTCGGGGAGGACGATTGGGCGCGACGATGCCTCGGTACCCCAAGAAACAGGATCCCATCGATCGGTGCTCAAGCTCGCCAGCAACCAAAGAAAAGATGCCTCCAAGAAAAACAATTTCCAGCTTCCCCGATTCAACACATGTGGATTAGCACAAACTCTCTTGTTTAGCTTTGATTTAGATCTAGTTCCTCTGAATT…
circ_001071	chr3	81618281	81618493	-	n/a	81618281-81618493,	1	intergenic	213	GT-AG	CTTATGGCAACATATAACACACAAAAAAAATAAGAAAGGTATTCTTCCCAAAGCATCGCCACAATATAACTAACCAATCCAACTAACCGTAAAAACAAATCAGCTTACCATAACTGAATCGACTTAACAGATGAGAGACGACGATGATCTACGGTTCAAACCTTTTCTTGAGCATCTGGCGAGTGATGGGCACATATCTCTCTTCTTCACCAC
circ_001072	chr3	213191723	213191959	+	Zm00001eb156500	213191723-213191959,	1	exon	237	GT-GA	TCCAATCTGCACCATTCTATAAGGAAAACCTAGATCCGGACTCCTAGCCGTCGGCCATGGCCACGCGCCGGGCCTTCTCGTCCATCCTCCGCTCTGCCTCTCGCATTCGCTCCGCCTCACCGTCCCCATGCCCGCGTGCGCCGCTCCACCACCGCCCGTCCCCCGCGGGCTTCATACTCAACCGTGTAGCCGCCTACGCCTCCTCCGCCACGGCCCAGGCCGCGCCCGCTCCGCCAC
circ_001073	chr3	186756514	186757312	+	Zm00001eb148610	186756514-186756667,186756750-186756798,186756881-186756995,186757307-186757312,	4	exon	324	GG-AG	CTTATAATGCAACAGACTCTAATATTTGTCTGGCAAATTCTCGGACAAGGTCAATAGGAAATGAACGGTAGCTATTCTTTCGCAGAAAGTCATATAGGCTTGGCCCAAGCTTCTCAAATACTATACAAATATGATTACGATAGTCAAACCAGTTCCGTATTTGCACACAACGGCTGCCAGTAAAGTCATGCTTCCCAAGTCTCTGGAGCACATCAATTTCTATCATAGCAGCCTCTCGGTATTTCTGAAGGGAGCGTACAATCTTGATAGCCACTGCTTCTTGGTTTTCCAAGTCCCAGCACTCCAAAACTTGACCAAATGTCC
circ_001074	chr3	149113294	149114250	-	Zm00001eb140460	149113294-149113362,149114245-149114250,	2	exon	75	GG-TG	CAGAGGCACAACAGACTTGATGCGGATGTATTTGTCGGCGAAGGATAACACATTGTCCTTACGCTTGGCCCGTCC
circ_001075	chr3	185254427	185270863	+	Zm00001eb148160,Zm00001eb148170	185254427-185254432,185270645-185270863,	2	intergenic-genetic	225	GC-AG	CTCATTCAGTTCAAATAGATCGATGTTTCCAACCTCAAGGATGGTAGACTTCACTGCAGTAGGAATGGCCACAGCAGGACCAACGCCCATAACAGCTGGATCCACTCCAACAACGGCAAAGCTCCTAATAGACGTGGTAGAAGGCAAGCAATTTTATCAATTAGAGGCTGTAATTGTGCTCTGGTTGATTTCCTCAAAGATAAGGGAATACCAAGGTACTGTTGC
circ_001076	chr3	12743498	12745408	+	Zm00001eb123050	12743498-12743503,12745196-12745408,	2	exon	219	GT-AG	CTTAAATATATCATTAGCAGCTTTCATTGCTTTGTTCAACTTTGACGAGTCTTTAGTGTCAAGCAATGCCACAACTGCTTGCATCCAGTTGGAAACAAATGACTTCCATGACTGCAAGGCAAGAAGAGCTACCACTATGTTTCTTGACACATACATAGATTCAGCAATTTCCACAAAAGCTTGCTCAAAAGCGGAATGAACTCTAGGCAAATCAACCAC
circ_001077	chr3	230087481	230088316	+	Zm00001eb161780	230087481-230087669,230088311-230088316,	2	exon	195	GA-AT	ATCCTCCTGATGCTCATGTCAATCATTGCAATGACTCTCTTCTTCCGTACCAAGATGAAGCATGGCACGGTGAATGACGGGGGTCTCTACATGGGCGCACTCTTCTTTGGTGTGCTTATGATCATGTTCAATGGCTTCTCTGAGCTGGCACTAACTGTCTTCAAGCTGCCTGTATTCTTCAAGCAGAGGGATCTC
circ_001078	chr3	228040961	228047576	+	Zm00001eb161040	228040961-228041098,228047571-228047576,	2	exon	144	GC-AG	CTCTCACAGATCCAAGATGTCATGCAGACGCTGAAGTATGCGCTTTATCACTGATATGGTAGCAAGTTCTTGGATCTGATCCCAGTAAGTTGGTCCTACTTTGGGGGACCTTCCTGGAAATATTTCAGATAACATGCTTGTTGC
circ_001079	chr3	7049931	7050876	-	Zm00001eb121410	7049931-7049936,7050580-7050664,7050760-7050876,	3	exon	208	GG-GA	TCCCAGCTTGCCTTGGAGACATTGCTCCCACTGGCGGCCTGGATAGCGTAGGCAGAGGCCTCGGCGGGCTCCTCCCTGGCGGCGTCCAAACCTGAAGGCCGGGCGAAGTAGGCCGGGAGGCCGAGGCTGAGCTCGAGGCCGCTGTCCAGGGCCTCCTCTCCGGCTCCGAGCGGGCCGCGCCACGCCATGATCGCCGCCGCCCGCGTCC
circ_001080	chr3	181057488	181057858	+	Zm00001eb146880	181057488-181057858,	1	exon	371	GT-AG	CTTCACCAGCGGAGCTTCTTTGCTCCCCAAGTTGACAGGCAGAAAGTGAAGGTTCGGCATTCTAAGCTGGACTGACGATATATCTGGGAACCTTCAAAGTGTACATGTGCATTCAGTGCAATGCAACTCATCAAAGAAAACTGTGTGCATATTTTAAGGGGCTGAAAACAAGGGACGACCGAATCAGAGTTACAGACCTTGTAAGGACTTCCTTGGCCATGAGGTATAGCGTATTTTGTACGGATGGACTATACACACCAACATCCGGAGGACCAAAGAACGTCTCTGCAAGGACTTTCTTTACATCCTGATATCTCTGCGTGAAGCAGAATGGCTTCGATGGGAGCTGCGAAACATGTTCAAAGGGATAC
circ_001081	chr3	206315065	206315360	+	Zm00001eb154220	206315065-206315360,	1	exon	296	GT-TG	CATCCCCAGCCACTATTATTATTACCATCATCATCACCTACCCGCTGCCTCCATCCTCCTCCTCGCCCCTGTTCCTCGCGTCTTCCCGTCGTCTCCGACTCGCTTCCAGTTCCCGATTTGCCGAACGCCAGCGACGCCGTCGCATGGAGATCTCCTTCGAGGCGTGGGAGGGCGTGCAGCGGCACGGCCAGGACCTCGCGGACCGCCTCGCGCAGGGCTTCACGGGCCTGCTCCAGGCGCCGCCGCAGTTCCCGTGGCCGCCGGCGCCGCACAAGCGGATGCCCTTCGACATCGAC
circ_001082	chr3	193385099	193385397	-	Zm00001eb150730	193385099-193385397,	1	exon	299	GT-AG	CTTCCCGTGCTTGTCTGCAAGAATGGTTTGGATAGCATTGCTCAGAGCACCAAAGGAGACACCCTGCGGTGTAGTTGCATCCGCTGATGTTTGGTTAGTCTGGCACCCACTGATCAGAATGCCATTGTTTGGTGCCCAGGCCTTACTCCCGGCGTACACCTCGTCAACACTGTGAACCTCTTGCTCTAATGCAGGTTTGAAAGCCTCTTCCTCCTTCCCTTCAAGCTTAGCCTTCAAGAACTCCTGAGCAAGGGCACCAACCATGCCAAAGACACCACCACCACCACTGCCTTGCTCAC
circ_001083	chr3	205136250	205136376	-	Zm00001eb153850	205136250-205136376,	1	intron	127	AG-AG	CTCTCCACCAGCCTCACGCCGGCATCCACCCCGGACCCGACGGCCACCCCGTCGTCTTCCATCCCACTTGTGTCGGGACCCGATGCTCCTTGCCGCCCAACTTCCCATGCGGCCAAGATATCTTCCT
circ_001084	chr3	150463702	150464108	+	Zm00001eb140790	150463702-150463707,150463914-150464108,	2	exon	201	GC-AG	CTTGTGGATGCTGTCATTGCTGCTGAAAGGTGAACTCAAAGGAGAACTCCGTCGTGTGTAAGTCCTCGGACTAGTTGCACCAGAGGAAAGGATATCACTTCTAGATTCAGTTCTCCATTTTCTTTGGTGACAACGTGAAATCAGTGTTTTCAGCCCAGCGAACCATACTTCAGCTTCATCTTTATCTTTGCATATAATTGC
circ_001085	chr3	216421652	216438814	-	Zm00001eb157470	216421652-216421743,216422144-216422254,216438809-216438814,	3	exon	209	CC-AG	CTTAATGTCTCAATATGGGTTAAACACCAAAGCTTCTTATACTTGTTCCCAAAAAAACCCACCTTGGCAACAGATGTTTCCGCATTCATAACAGATAACAGATGATTGTCATCATCAATATCACCATCAGTGTCAAAAACACATATTAATCCATCAACTGCTGCAGAAATGAGTTTACTTTGTTGATCTGGTGTGAATTTGACTCCTGG
circ_001086	chr4	3891755	3892030	+	Zm00001eb165560,Zm00001eb165570	3891755-3892030,	1	exon	276	GT-AG	CTCCACCTCATCGGCTCCCACCCGCACGTCTCCTTCCGCGACCTCCACGCCAAGTACGGCCACAACGGGCTGATGCTGGTGCAGGTCGGCGCCGTGCCCACCATCGTGGTGTCCACGCCGCAGGCCGCCGAGGCCGTGCTCCGCACGCACGACCACGTGCTGGCGTCCCGCCCGCGGAACCCCGTCGCCGACATCATCCGCTACAACTCGACGGACGTGGCCTTCGCGCCGTACGGCGAGTACTGGCGCACGGCGCGGAAGGTGGTCAACACGCAC
circ_001087	chr4	180058889	180059143	+	Zm00001eb192680	180058889-180059143,	1	exon	255	GT-GG	CCCGACCGACCGACCGCCGAACGAACCCGACACACCTCGTCGCGTCGCGGCGCTTCTCTTCTCTTCATGCGCTATCGCCGCCGTTTCCACCTCTGCGACGCCCACAGATAGGCAGGAGGAGGACGAGGAGGCGATGCCTTCGCTCTCCTGCCACAACCTCCTCGACCTCGCCGCTGCCGACGAGGTGCCCCTGCCGTCGCCGACGCCGCTCCGCCTCCCGCGCGTCATGTCCGTCGCGTCCCCGGCCTCGCCCAC
circ_001088	chr4	18775968	18776219	-	Zm00001eb169310	18775968-18776219,	1	exon	252	GG-AG	CTCCTGTCCTCCTCCCTCCTGCCCCGATCCGCCCTCCCCGCCGCTCGCCGCACCCGATGTCGGCCGCCGACCCTTCCGCGGCTCCGGCCGCGGCCGCCGACCCGGACGGCCCTGACTCCGTGCGGCTCACCTGGAATACCTGGCCACGGTCAAAGGTCGAGGCCAGCCGCTGCGTCGTGCCGCTCGCCGCCACCATCTCGCCCACTCGCGTCCCGGATCCCTCCGCGGCATCCCCGCCGCCGCTCCCTTACC
circ_001089	chr4	228528041	228529024	-	Zm00001eb203570	228528041-228528107,228528793-228529024,	2	exon	299	GC-TG	CATAGCCCCTGACTTGGACAAGACCAATCTCACTGCAATCAGCAGCATATATGCACATTTTCCATTCCTTATCTACTATTATTTGCCCATCTGCAAAAGATACTTCAACAAGTGACTCGGCAAGTTGACTTAGTTGAAGCACTGTAAATCTTGTAAACAGTTGTACAGATCGGAGCAACTTCAATGATGGTATGTTTGAAAATTCTGACATCAAAATACCCCGGAAGTCCTCCCTCTTTAGAGCCCATAATGTTCCACTGGTCACAGCACGAACTGAAGCCTGAAGCGGCTTATTGTGC
circ_001090	chr4	204478121	204478319	+	Zm00001eb199590	204478121-204478319,	1	exon	199	CA-GG	CCCTCGCCTCCTCCCCCAACGATAAAATCCTCACCGCGCCGCAACGCATCTTCGCCCCACAAACCCTCGTCTCGTGCCACTTTCTCAGTCCCCTCTAGCCGCCGCCTACCGCTCGCGCTCTCCTCGCGTTCGGGAAGGTCGTTTCGCCATGGCCTCGGAGACGGAGACGTTCGCCTTCCAGGCGGAGATCAACCAGCTG
circ_001091	chr4	228757814	228760285	-	Zm00001eb203600	228757814-228757923,228758148-228758202,228758374-228758456,228758549-228758675,228760215-228760285,	5	exon	446	GT-TG	CAATCTCTCAGGATGCAGATTATTGGAACGGCTGTTTAATTGCATTCTGATTGCCGGGCGTTGTTCTGCTTCAAGCAGACCTGAAGCATTAATTGGGCGTGCAACACCAACTTGGTGCTTGTCCACGTTTGTTGCAACTGGACGGCTGCTTACGCCTGCATCATGAGAGCATCCTTGCTGAACCTTAGCCTTCTGGGATTGCTTACACTTCAACAAAGTCCAGTCATACACATAATCAAATTGATAGCCTTCGCGCTCAAACAATTCTCGAAAGACATGCCTCAAGAAACTATAATCGGGACGCTGATCAAATGTCAGAGAATGGCAGTAGTGGAAATAGGAAGCAAATTCCACAGGATGGGATTTACATAGAGCCTATAAGGTATATGGCGGTTGGTG…
circ_001092	chr4	228757814	228760285	-	Zm00001eb203600	228757814-228757923,228758124-228758202,228758374-228758456,228758549-228758675,228760215-228760285,	5	exon	470	GT-TG	CAATCTCTCAGGATGCAGATTATTGGAACGGCTGTTTAATTGCATTCTGATTGCCGGGCGTTGTTCTGCTTCAAGCAGACCTGAAGCATTAATTGGGCGTGCAACACCAACTAGTTTTATACTACATAGACTACCTTGGTGCTTGTCCACGTTTGTTGCAACTGGACGGCTGCTTACGCCTGCATCATGAGAGCATCCTTGCTGAACCTTAGCCTTCTGGGATTGCTTACACTTCAACAAAGTCCAGTCATACACATAATCAAATTGATAGCCTTCGCGCTCAAACAATTCTCGAAAGACATGCCTCAAGAAACTATAATCGGGACGCTGATCAAATGTCAGAGAATGGCAGTAGTGGAAATAGGAAGCAAATTCCACAGGATGGGATTTACATAGAGC…
circ_001093	chr4	80891948	80892104	+	Zm00001eb179020	80891948-80892104,	1	exon	157	GC-CA	TGCCTCTCCTGATAGGAGGAAGGATAGAGAGCATGATAAGGATAAACGGGACAAAGATATTGAAAGGCATGACCGTGAACGCGAACGTGAAAGGATACGGAGGGATAGGGAGAAGGATCATAAGCATAGAGAAGTTGATAGACTATACAGGGATCGC
circ_001094	chr4	7877889	7878002	+	Zm00001eb167360	7877889-7878002,	1	exon	114	GG-AG	CTCCTCCCCTACCGGCCGCTCCGTCCATAAAACCCAACCGCTCCCAACCCACTCCACATTTCCTCCCCTGGGGTACACCGTGCACACAACCGCCGCCGCAGCCCCTCAGACTCC
circ_001095	chr4	153477215	153480585	+	Zm00001eb185960	153477215-153477220,153480452-153480585,	2	exon-intron	140	AT-AG	CTAGCTCCTGAAGATTAATATCTGGAGACAGGAAAGAATTCTCCTTCATCTTATTTGTATGAATTTGAAGGATTTGCAAACGACCATTTTCATCAGGCAGGTTTATCTCAATGTGTACTTCCAATCGTCCAGGTTAGGAT
circ_001096	chr4	207494805	207495473	+	Zm00001eb200320	207494805-207494860,207494957-207495134,207495221-207495322,207495402-207495473,	4	exon	408	GT-AG	CTTAGTTTTCAAGTCATATATTACATCAGCAATGGTGCTATTTTTTGGAAGCCTGATGCTATGAATAACAACCTCATCCTTCGTAGGATGGTGAAATGCAACTTTCAGGGTTTTTAGGAACTGCAATTCTGGCAGTGGTATATCCAACACTTCATAATACAAGATGTCAGACGTCTGATTGTAGTGGATGAGCATGTCCGACAGATGCACCACTCCTCGATATTTGACGGGCTGTGGTTTAGGTTGCTGAGAGTAGCAATTGTGGGGTGTAAGCCGAATTTTCGCTGGATCGTCCAATTCAAGTTGGCGAGCAACTCTCTCAACAACATCATCATAGGTATGAAGCTTTGACAATTCCAAAGAAAAATCATCATCCTTTGGTTTCTCCAAAGACCGGAA…
circ_001097	chr4	180058391	180058629	+	Zm00001eb192680	180058391-180058629,	1	exon	239	GT-AG	CTTCCCACCGACCTCCACCACCGCTTCTACCACGGATTCTGCAAGCACTACCTCTGGCCGCTCCTCCACTACCTCCTCCCGCTGACGCCGTCCTCGCTCGGTGGCCTCCCTTTCCAGCGAACGCTCTACCACTCCTTCCTCTCGGCCAACAGGGCGTTCGCCGACCGCCTCACCGAGGTGCTGTCCCCCGACGAGGACCTCGTCTGGATCCACGATTACCACCTCCTCGCGCTCCCGAC
circ_001098	chr4	182639845	182640046	-	Zm00001eb193370	182639845-182640046,	1	intron	202	GC-TG	CACATTTGACACCGTCTCTTTTCAGTCTCGGCAACACAAACATTTGGTACGTGCTAGCGTAACAGTGGCGCACAACAAGAGCTTCTGTGTCGTCGTCCTGTTCCTGTACAAGGGTTTGCAAGAGACGGAGAGAGAGAGTGAGAGAGAGAGAACATCTGGAGTCTGCGTACTGGCAAAGGGTGTCTCTGAGGCTCACTTTTGC
circ_001099	chr4	96797606	96801852	+	Zm00001eb180520	96797606-96797776,96801775-96801852,	2	exon	249	GT-AG	CTGTCTTACAGCCATATCACAACTTCCATCAACAATGATCTGTAACAATCTCACCAAATGCTGTGGTGTGTACTGGAACTGGTTGAGGCTCTCTTCTGCCGCCTTGCGCTCCTCAGGAACGTGGCTGAGCGCGGCGCGCAGCACGACGGCGAGGCTTGGTAGATCCATGTCCACCTGCGCCTGCGCCTGCGGCGGCGGCGGGTTGTGCCAAAGAGGCTGGAGGGCTGAGGCGGAGACCAGGGGGGCAAC
circ_001100	chr4	36498502	36499372	-	Zm00001eb172900	36498502-36498544,36498841-36498898,36498988-36499126,36499367-36499372,	4	exon	246	CT-AA	TTGTTTACATCTGGATGATAGCTCCTAGCAAGCTTCCGATAGGCGCTCTTGATTTCAGATTTACTAGCATTTCTTGAGACACCAAGTACGTTATAGAAATCAGCTTCAGCTCTGACGACAAAACTTGAGCCCCTTTTCTGGCGAGATCTTGACGACGGTACATGGTTTATTTGTTCAGAAGAGGTCTGTGAATGCAAACTATAACTAGGTGATAGCAGGTGTTTACCTCTACCTCTTGAACACCAG
circ_001101	chr4	180058348	180058617	+	Zm00001eb192680	180058348-180058617,	1	exon	270	GA-AG	CTCCACCACCGCTTCTACCACGGATTCTGCAAGCACTACCTCTGGCCGCTCCTCCACTACCTCCTCCCGCTGACGCCGTCCTCGCTCGGTGGCCTCCCTTTCCAGCGAACGCTCTACCACTCCTTCCTCTCGGCCAACAGGGCGTTCGCCGACCGCCTCACCGAGGTGCTGTCCCCCGACGAGGACCTCGTCTGGATCCACGATTACCACCTCCTCGCGCTCCCGACCTTCCTCCGCAAGCGCTTCCCGCGCGCCAAGGTCGGATTCTTC
circ_001102	chr4	236171723	236173170	-	Zm00001eb204640	236171723-236171961,236173165-236173170,	2	exon	245	AG-AG	CTTTGAGCACATAGAGGACTATTTGGTTCAAGAGGAGAATCACAGGAATCATAGTCGGCTGAATCACTTTCTCCAGTTGCAGACATATGGGATGTGACAACAGCTTTGGATGAAAATGGAACTAGTTGTCCTGGAAAACGCATCAGGTCAACTAGAAACTCCGCAGATTTCAGAATGACCACAACAGACATATGTTTGGATGAATTATCATATCCATGAGGTTCTTCATTTGGAATGCCGCCACT
circ_001103	chr4	189765877	189767073	+	n/a	189765877-189766339,189766439-189766573,189766919-189767073,	3	intergenic	753	AA-AG	CTGAAATCTTTGGGACTCCAGAAATGAGAAGTGCCATCAATTGAACGTGTAAGTAGTATCGGCAGATTGGGATGTGAGAAGACAGAAGACACGGGAGACATCAAATTTTGTTCCATACTATCATAAACATATTTCTTGTTCCGCATGTCCCATATTTTTGCAGTCTTATCATGAGAGACAGTAATAATCAAATACTGTTGATCATCACGTGTGAAGAATTCCAGGAAGTTCACTTCGTTAAAAAAACCAGGCAGATTATAGTTACATTTGGGAAGATCAACGCTCCAAACCTTAACCCTATAGTTCGAAGCGCTAGCAAATCTGTTGGTCTCCTTTGGGTCAAAAGCAACTTGACATACAAAATTCCTTGCAACGTACTCCCTCTCAAATGTTTGTGTG…
circ_001104	chr4	13656651	13656973	+	Zm00001eb168410	13656651-13656973,	1	exon	323	TT-AG	CTGAAATATAAGGCCATCAGCATCATGGCAAAGGGATGGAATGAACACCTTAAGAACCTTTTTTACTGTTGAGAGCAGCCAAAAATCTTTTCTTCTAACCTGGTAAAGTCATATAATAAACGAAAAAGAGAAAATTAACTTTGCAGGACATGAATTGAACATTATAGTTCAGGAGGAATCCTAGAATCTGATACCGAAAATAATTCCATGTCATATTTGTACAACGGATTGCTCTTAGAACCACTCTCAAATTTATTTTTCTCATAATAACGTGGTCGTATTATTTCATCTTCCAGCATTTTCCACCTTTCAGAAAACGGCAA
circ_001105	chr4	204109673	204109885	-	Zm00001eb199430	204109673-204109885,	1	exon	213	GG-AG	CTCCCCCCAACCCAATCCCGTCGTCACTCTCTCACTCCACTGCCTCCGGAACACCCTAGCAATGGAGCCCAACTCCAGCATCCCTCCCCCGGTGATGGGCGCGGCGGTGGCGTACCCTCCGGCGGCCGGCGCCGCGTACTCCGCCGGGCCGTACGCGCACGCGCACGCGGCGTTGGGCGCGCTGTACCCGCCTCCCCCGGCGCCGGGTCCCCC
circ_001106	chr4	52559123	52559391	+	Zm00001eb175840	52559123-52559169,52559265-52559391,	2	exon	174	AT-AG	CTGGTAAAACAACACAATTTAACTGACTACCAGCTTCAGGTAACCTAGCAGACGATGGTGCGCCAACTACAATATTAGGTTCTAAAACCTTTTGAGTTGGACTATATGTAAACATGGTATTGTTGACCTCTTGGGTAAGGACTGGGCCATTAAAAGCATGGGAACTGCTACCAT
circ_001107	chr4	191170657	191172107	-	Zm00001eb195940	191170657-191170692,191170785-191170924,191172102-191172107,	3	exon	182	CT-AA	TTGCAATTGATCGCGAAGAACTAATGATTTCGACTCCTGTTCGTTGAGAGCTTCTTTCAATTGATTGACCAGGGATATCCTCGCCATATCTACACTTTCGAGTTGTTTGATACAATGTTTAAGGGTCATTTCCTGTTCTTGAAGGTCAGAGATCAATGACAATGCTGGCTGATTACAAAGAG
circ_001108	chr4	1361129	1361427	+	Zm00001eb164530	1361129-1361427,	1	exon-intron	299	GT-AG	CTGCCCCCGACGCCACGCCCCAACGGCGACGACCCGACCTCCGACGACCCAGCCTCCTCCGACGATCTCGTCCTCCCCTTCATCTCGCGGATGCTCATGGAGGAGGACATCGACGACAAGTTCTTCTACCAGTTCCCCGACCACCCCGCGCTCCTCAGCGCCCAGCAGCCGTACGCACAGATCCTCTCCGACGCCACCGCCTCCTCCTCCTCCGACTCCGCCACCGCCATCAGCTCAGGGACCGTCGGGAACTCCACCCTCTCGTCCTCCTCCCTTGCCGCCGCATCTGCCGAACCCAC
circ_001109	chr4	166038569	166038854	-	Zm00001eb188560	166038569-166038854,	1	exon-intron	286	AT-AG	CTCCCCCATCTCCTTCCCCAGCACGTCGCAAACCCTTCGTCGCCACCCCCGCCTCCCGCCGCGGCTCCCGTCGTCGCGTGGCCGTCGCGAGCCACCGCTGGCGTCTCTCGTCCGGTTCTCTGAGTCTCGGCGACCTGTTCCTCCGCCGAGTTCTCGGGGCCCTGCTGTCGCCACCGCCGAATCCTGCTGTCCTCGCCGCAGCCGGGGAACGCGGTGTGTTGCGGGAGCTGGCACCGCCTCCTTCGAGGTGCGTCGTCACGGAGGGTAGTTTCCGTTTCGTCTCCAT
circ_001110	chr4	177798473	177798696	-	Zm00001eb191920	177798473-177798696,	1	exon	224	GT-AG	CTCCCCACCACCAAATACCCAACCAGCACCACCCACCGCCTTCTGCTTTCTTTCTTTCTCGCTCCTTACAGCAACACATAGCGCTCAGCTCACACCTCACAGTCAGCTCAGGCTCATCTTCTCAGCGAGTTAGCAGCAGCAGCTTGAGGCCCAGCCGCGGCTGCCTGCGCGCAAGCATAATGGAGAGCAGATGGCGGAAGGCCAAGATGTCGCTAGGGCTCAAC
circ_001111	chr5	181403991	181405661	+	Zm00001eb245310	181403991-181404096,181405114-181405331,181405437-181405511,181405595-181405661,	4	exon	466	GT-AC	GTGACTTTCGGAGAAACTGGTTAAGAATTTGCTTTGTATTGGCCAGAACGGCTTCAACTTCATCAGCCTTCCTTAGTTTCAAATAAGGAGTAGGTAAGCTCCCCACAGAATTCATCGGGCATGGCAAACCCACAAGTGTAGCCATTAGGGGAGCTATGTCAGCCTGGTTGACATCTACTCTTTCAAATCCTTCAAGGGCCCAGTCTTTTGGAGTGGGTGTATCATGTTTGTGGTTATCTACAAACCGAAAGCCGTCATCAGGTTTCTCTGTATAAGCCAGGAACTTTGGGCTTCTAATTCCAGCACCCCATGCCACAAGAGGAGTATCTGTGTTTGAAGGGTGTCCGTCTCCATGGCTTCCTTTGTCACTCATTCCATGATCTGCAGTAAACACGTATG…
circ_001112	chr5	187800666	187806750	-	Zm00001eb247040	187800666-187800737,187806560-187806750,	2	exon	263	AA-AT	ATCTGAAGCAATTTGTGCCATTGTCAGTTATGCAAGCTCCAAAAAGGTCAAGATGAGTCAGCCTAGTGAGACCTTCATCCACCAATTGGCTTCTCTTCCTTGAGCAGACACCACCCATGATCGAGGTGAAAGTACTGAACAACAGTCACTCCTCTCGCTATCCACAAATTGGTTCTAGGAAACTGGTAGCTGCCAGCTACTATCCTATAATCCAATCGTGGCATAGTTAGAGCCCATGGCAGCCTTCGTCACCTCACTCCATT
circ_001113	chr5	46527982	46530090	+	Zm00001eb224960	46527982-46528039,46529765-46529884,46529977-46530090,	3	exon	292	GA-AG	CTCATCAGCATTCTTGGTATGAGCAGTAATGTCTCCATAGTTTATTTCTTCAGTTACTGACAAGCCTGCTCCATGGAAGGATATCACCCTCTGCTCACCAATCTCCTTCTCAACCTGTTGTGGTGGAGGCATAACCTCATAGCACAGCAATGATAGTGGATATATGTGCCCAGGAACACCAGCATGCTCCAGAAGCCTCCTCATATTGTCCACTGCAGATGAATCGAATGGTGCCTGGTGGAGATTCTCTTCGATATCATGGAAAAGGGAAATGTTGCCAACATAGGAGTTC
circ_001114	chr5	220359234	220359353	+	Zm00001eb256920	220359234-220359353,	1	exon	120	AT-AG	CTGGGAAGGTAACCTCCATTGTGATCAAGTTTGGAGAAAATAGACCAGTCTTTCATAATGAAATCACTTGCTTCCTTAGACGAAGTTGGGGAGTTTAATAAGAGTAAAACGTTGTGGAAT
circ_001115	chr5	210122490	210122881	+	Zm00001eb252430,Zm00001eb252440	210122490-210122881,	1	exon	392	CA-GC	GCGCCCGGATGCCGACTCCTACGCCATCCTCCTCGAGGGCAGCGAGGCCGCCGCCGACCTGCGGGTTGCGCGCGAGGTGTTCGACGAAATGGTGCAGGCCATTGGATTTTATCCTGACAACGTGCCTGCCTATGACTCCTTCCTCACTACGCTTGTTTCAAGTGACTCCTCCACGGCGCTACCGGAAGCAATGGAGTACCTAAATGTCTTGAGCAGGCACGGCTGTTCGCCAGGAGAGAAGTTCTTCCGTGCTGCTCTTGCTGCACACCTTGATGCACGACAATTGCGCGGAGCCATGAATCTCTGGGATGACTTTGTTGGGCGTCGAGGACTCGTCCCAGATATGGAAATGTACAACACAATGATCAAGCTGCAGGGCAGTCTCGGGCATG
circ_001116	chr5	221425268	221425351	-	Zm00001eb257510	221425268-221425351,	1	exon	84	GT-AG	CTGCTAGCCAATTTCTCGTGCCTGCCGGTGTACCTCCCTACCGACCTCCACCACCGCTTCTACCACGGATTCTGCAAGCACTAC
circ_001117	chr5	195067634	195070133	-	Zm00001eb249130	195067634-195067754,195069262-195069330,195070024-195070133,	3	exon	300	CG-AG	CTGATTGGAGATCAAGCATTTGAATGAGCATGAAGGTTATATTTACACCAGCGACAGCAAATGGATACTCCCAGATTGCACGGTCACCATTCTGCTTGCGAAGGAGTTCCTGGAAAGATTTCTGATGCTCTCTGTTTGCACTATCATACTGAACTTCTATACGGTTTTGTAACCTCTGTAGGCATTCTTCCTGCACAGGCGTCAAATCGAAGGAAAGGCGCGCATCGCTGTCCCTCCTCTGCGCGCAGACGCAGGAGAGCCCCCTCCCGATCCACGCCGTCGACCCCGTCACGACCTCCG
circ_001118	chr5	42321259	42324232	-	Zm00001eb224450	42321259-42321264,42324103-42324232,	2	exon	136	GG-AG	CTGTTACTGAATATCATTCTCCGCTGGATTCTTTTCACGTTCTGACCCAGACCATTTCCTCCTCTTGTTGTCCACTTCCTACCCATCTCAAGAATTTGGATTCTAGTGATACAGGATCTCAGCATCCACGCAGACC
circ_001119	chr5	220478906	220479623	-	Zm00001eb257010	220478906-220479036,220479356-220479483,220479558-220479623,	3	exon	325	AT-AG	CTGCTGCTTCGCCTGACCTTTGCCTTGGTAATAAGCATTTTCAGCACGCTCCAGTGCTTTAAATTTTGCATCCAGACCAGCTTTTGCCGGAACCTTTGAAATGGCTATATTACTCACTACCTCATTCCCATCTTTGAAACACTGGAGAGATCTTATTAAAGCGACAGTTGGGCACACGACGGAGTTCCTCCAGACGAGACAACACTAAATTTGGGTGTTTGCAAGCATCGCATGAGCGTTGGCATAAAGTTGGTTGTACTTTCTCTCCAAAGCTCTCAATGATCTTTTTCCGCCGGCAGCTAGAAATTTCACAGTAGTCAATAAT
circ_001120	chr5	149217627	149220766	-	Zm00001eb238860	149217627-149217684,149218032-149218100,149218407-149218552,149218650-149218702,149220761-149220766,	5	intergenic-genetic	332	TT-AG	CTTAATGGATGTATCAATATCCATGATTGATACTTCACCCATCTTTTCAATGAGTACCCTTTTTGACCCCACCAAACATAGGCTCCGAACAGGTCTTGTGCAGCCAATCTGAAGTATTCTCTCAATCCTAAAACTAGGAGACCTCCACAAATGAACAGTTCCGTCTTCCGAACCTATAATCAAATATGGAGAATTTGGAAGGGAAATGATAGAAGTAACCGGAGACATAACATCCAATGTATGAAGACAAGTCTTTTTCTGCAAGTCCCAGATCTTGGCCGTATAGTCACCAGAGCCACTAATCAAATATTGATTACTGTCGTCACAATCAA
circ_001121	chr5	149217627	149220766	-	Zm00001eb238860	149217627-149217684,149218407-149218552,149218650-149218702,149220761-149220766,	4	intergenic-genetic	263	TT-AG	CTTAATGGATGTATCAATATCCATGATTGATACTTCACCCATCTTTTCAATGAGTACCCTAAAACTAGGAGACCTCCACAAATGAACAGTTCCGTCTTCCGAACCTATAATCAAATATGGAGAATTTGGAAGGGAAATGATAGAAGTAACCGGAGACATAACATCCAATGTATGAAGACAAGTCTTTTTCTGCAAGTCCCAGATCTTGGCCGTATAGTCACCAGAGCCACTAATCAAATATTGATTACTGTCGTCACAATCAA
circ_001122	chr5	89828433	89829546	-	Zm00001eb233540	89828433-89828438,89828715-89828786,89828894-89828965,89829417-89829546,	4	exon	280	TT-TT	AAGTCTAGATTTACAAGTCCCGTGAGGGAATCAAATGCATCTGGTAGCTTTCCATCTAGATGGTTATCATTCAGTGACATGGCTGTTAGACTATGGAGTTCTGATAATGACATTGGAATGCTTCCAGTTAGTTGGTTATCTGAGAGAAACATTGAGGTTATACTTGAGCCGGTACATGTGACACCCTGCCAGCTCTCACCACAGGGATCTCCAGCACTAGCAGACCATCCTGGCAGCTTTGGTGATCCAAGTGCAACATAAAGTCCATTTATAGCAGAAA
circ_001123	chr5	224507961	224508514	-	Zm00001eb259140	224507961-224508154,224508509-224508514,	2	intron	200	TG-AT	ATATCGCAGCTGCCGCGCGACAGACGCAGCTACGCCGGCGGCGGCGGTAGCCGAGGCAAGTTCGCCTCCGCCATCAGCGGCGGCGCAAAACTTCGACCATGGGTCCAGCGAAGTCCATGTGTCACCCTTCGCTGCACCCACCAGACCGGCGGGCATCGTAGCTGGTACCACCGTCAGTTGCCCAACCTCCGCCCCCATCA
circ_001124	chr5	1123734	1123873	+	Zm00001eb210500	1123734-1123873,	1	exon	140	AG-GA	TCCGCGCTCGTGCTCGACAAGCGCGTCAGCCTCACCTACACTCACTCCACTAGCCTCGCCGCGGCCCCCGCCGCCGCGCCGCCCTCCCGCACCGCGCTCGACTGCACCGTCACTTTCGACCCCGCCAACAAGGTCAGCCT
[truncated: 1,167 more rows]
