# Supplementary material for: A Combination of a Genome-Wide Association Study and a Transcriptome Analysis Reveals circRNAs as New Regulators Involved in the Response to Salt Stress in Maize
Source: Int J Mol Sci. 2022 Aug 28;23(17):9755. doi: 10.3390/ijms23179755 (PMC9456493; doi:10.3390/ijms23179755)
Supplement: Supplementary file 1 [file ijms-23-09755-s001.zip › Table S3-Detailed information of DECs.xlsx]

## Sheet: Sheet1
Table S3. Detail Information of DECs.
CircRNA_ID	CK_BML1234_00h	CK_L2010-3_00h	CK_BML1234_06h	CK_L2010-3_06h	T_BML1234_06h	T_L2010-3_06h	CK_BML1234_18h	CK_L2010-3_18h	T_BML1234_18h	T_L2010-3_18h	CK_BML1234_36h	CK_L2010-3_36h	T_BML1234_36h	T_L2010-3_36h	CK_BML1234_00h-vs-CK_L2010-3_00h			CK_BML1234_06h-vs-CK_L2010-3_06h			CK_BML1234_18h-vs-CK_L2010-3_18h			CK_BML1234_36h-vs-CK_L2010-3_36h			CK_BML1234_06h-vs-T_BML1234_06h			CK_BML1234_18h-vs-T_BML1234_18h			CK_BML1234_36h-vs-T_BML1234_36h			CK_L2010-3_06h-vs-T_L2010-3_06h			CK_L2010-3_18h-vs-T_L2010-3_18h			CK_L2010-3_36h-vs-T_L2010-3_36h			T_BML1234_06h-vs-T_L2010-3_06h			T_BML1234_18h-vs-T_L2010-3_18h
															log2(fc)	Pvalue	FDR	log2(fc)	PValue	FDR	log2(fc)	PValue	FDR	log2(fc)	PValue	FDR	log2(fc)	PValue	FDR	log2(fc)	PValue	FDR	log2(fc)	PValue	FDR	log2(fc)	PValue	FDR	log2(fc)	PValue	FDR	log2(fc)	PValue	FDR	log2(fc)	PValue	FDR	log2(fc)	PValue
circ_000009	3.44	13.06	4.52	18.965	11.785	16.34	0.001	20.38	18.735	7.72	5.49	3.375	0.001	58.33	1.92467	0.420627	0.802765	2.06894	0.674605	0.880871	14.3149	0.11139	0.396935	-0.701919	1	1	1.38256	0.824719	0.999849	14.1934	0.203821	1	-12.4226	0.735321	1	-0.214931	1	1	-1.40048	0.495543	1	4.11128	0.0491994	0.934789	0.471456	0.841182	1	-1.27906	0.607554
circ_000010	184.155	0.001	140.485	24.08	116.01	5.94	185.95	3.235	182.555	14.48	153.64	0.001	132.795	0.001	-17.4906	7.19715e-10	2.27196e-08	-2.54451	0.0002174	0.00152576	-5.84501	2.58983e-07	4.68419e-06	-17.2292	1.65437e-06	2.69899e-05	-0.276167	0.321096	0.6691	-0.0265836	0.728999	1	-0.210353	0.779842	1	-2.0193	0.419793	1	2.16222	0.600126	1	0	1	1	-4.28764	0.000539437	0.00704947	-3.6562	0.000148244
circ_000015	394.21	782.64	594.57	991.795	316.96	779.53	367.535	868.665	426.105	948.21	726.4	970.245	707.825	1067	0.989384	0.0124492	0.0855335	0.738195	0.40206	0.673298	1.24092	7.3937e-05	0.000887035	0.417585	0.121189	0.443705	-0.907546	0.00217974	0.0172988	0.213327	0.16099	1	-0.0373715	0.928073	1	-0.347437	0.420355	1	0.126407	0.792546	1	0.137139	0.796955	1	1.2983	0.000821241	0.0101551	1.154	0.00247069
circ_000018	663.215	555.485	66.3	619.065	869.38	763.375	896.29	1082.19	1384.89	2446.31	478.465	622.5	751.395	1507.4	-0.255729	0.620678	0.913812	3.22301	7.65929e-10	1.28543e-08	0.271923	0.283064	0.658283	0.37966	0.263693	0.697078	3.71291	3.62101e-11	1.68829e-09	0.627739	0.00533804	0.171116	0.651158	0.146697	0.976507	0.302301	0.302838	1	1.17665	0.00398595	0.183897	1.27592	0.00501386	0.251149	-0.187595	0.872287	1	0.820831	0.0450058
circ_000027	38.59	3.125	70.985	9.26	61.805	0.001	86.155	10.86	96.475	1.9	35.92	0.001	33.46	7.71	-3.6263	0.0647952	0.288858	-2.93843	0.00267862	0.0136645	-2.98791	0.0360763	0.176697	-15.1325	0.0589035	0.264834	-0.199791	0.570946	0.868583	0.163221	0.541083	1	-0.10235	1	1	-13.1768	0.56043	1	-2.51495	0.58855	1	12.9125	0.505339	1	-15.9154	0.00257456	0.0267883	-5.66608	0.000176696
circ_000031	152.46	284.22	35.65	402.58	119.425	299.54	206.545	485.425	105.49	655.105	144.705	559.57	61.01	545.985	0.898577	0.0344142	0.188713	3.4973	2.25809e-09	3.48649e-08	1.23279	0.00011318	0.00127716	1.9512	9.34021e-07	1.66664e-05	1.74413	0.0668581	0.251055	-0.96935	0.231514	1	-1.246	0.164667	1	-0.426527	0.429343	1	0.432478	0.240574	1	-0.0354573	0.793615	1	1.32664	0.00555014	0.0514731	2.63462	9.46551e-10
circ_000032	2989.32	3676.41	375.045	3486.43	3091.22	3713.2	3314.98	4090.77	2699.47	4342.46	3409.02	4338.62	2851.07	4467.92	0.298481	0.231003	0.61811	3.21662	3.39722e-15	9.83496e-14	0.303372	0.165663	0.501368	0.347879	0.119293	0.442314	3.04304	2.92963e-14	2.25811e-12	-0.296324	0.893764	1	-0.257856	0.410558	1	0.0909085	0.571896	1	0.0861401	0.903835	1	0.0423671	0.94726	1	0.264487	0.304664	0.779529	0.685836	0.0584032
circ_000036	103.28	0.001	199.35	0.001	121.06	0.001	175.45	0.001	111.245	0.001	108.55	0.001	136.475	0.001	-16.6562	6.07499e-06	9.71999e-05	-17.6049	8.41838e-14	2.03093e-12	-17.4207	1.08585e-08	2.31447e-07	-16.728	0.000120602	0.00140539	-0.719581	0.0952303	0.322917	-0.657319	0.49213	1	0.330277	0.660705	1	0	1	1	0	1	1	0	1	1	-16.8854	3.59199e-05	0.000616535	-16.7634	1.02471e-06
circ_000041	117.765	0.001	372.315	10.87	28.42	9.595	45.26	32.08	196.375	92.605	113.225	25.61	78.85	0.001	-16.8456	2.27404e-05	0.000336213	-5.0981	2.91487e-16	9.64405e-15	-0.496562	0.949526	1	-2.14441	0.328819	0.761586	-3.71155	1.23182e-07	3.20561e-06	2.1173	0.00151498	0.0737071	-0.52201	0.789424	1	-0.179997	1	1	1.52942	0.25755	1	-14.6444	0.201836	1	-1.56655	0.614155	0.953722	-1.08445	0.0856792
circ_000044	209.835	103.49	41.755	194.33	96.395	125.835	245.07	166.04	97.13	204.985	181.07	442.03	119.435	359.245	-1.01976	0.0751018	0.321056	2.21849	0.00374117	0.0182743	-0.561663	0.372997	0.740206	1.2876	0.00093011	0.00863566	1.20701	0.278348	0.614342	-1.33521	0.0391451	0.554473	-0.600322	0.380582	1	-0.626975	0.518454	1	0.303988	0.582163	1	-0.299176	0.341589	1	0.384503	0.488717	0.894944	1.07753	0.0584059
circ_000048	477.935	223.48	0.001	167.695	270.725	136.935	490.33	435.69	306.66	378.015	252.82	303.565	670.21	316.92	-1.09667	0.0158767	0.103022	17.3555	6.14351e-08	7.99347e-07	-0.170451	1	1	0.263895	0.470285	0.852485	18.0465	3.07261e-12	1.63726e-10	-0.677113	0.363358	1	1.4065	0.000562118	0.0295781	-0.292348	0.826306	1	-0.204859	0.619597	1	0.0621132	0.976628	1	-0.983337	0.175322	0.589534	0.301803	0.62895
circ_000050	45.645	66.265	394.635	174.4	68.595	139.395	13.51	63.54	36.675	70.57	17.015	74.595	51.975	47.715	0.53779	0.517083	0.86883	-1.17812	0.0105836	0.0452242	2.23364	0.134669	0.451908	2.13227	0.0777057	0.32269	-2.52434	0.000122509	0.00155781	1.44077	0.357061	1	1.61101	0.252363	1	-0.323221	0.804568	1	0.15139	0.905048	1	-0.644636	0.474561	1	1.023	0.220488	0.670796	0.944258	0.390823
circ_000052	162.68	87.4	20.2	80.31	108.74	75.125	190.29	95.455	155.725	53.025	175.645	97.285	174.44	89.315	-0.896332	0.141665	0.470068	1.99122	0.0874162	0.242172	-0.995307	0.278807	0.658283	-0.852373	0.178158	0.555071	2.42846	0.0154691	0.0832205	-0.289199	0.909963	1	-0.00993161	1	1	-0.0962866	1	1	-0.848148	0.219218	1	-0.123315	0.874168	1	-0.533518	0.658707	0.982508	-1.55426	0.00593601
circ_000053	1689.98	1035.13	674.655	1126.43	2077.39	1374.58	2276.82	1389.76	1991.78	1237.17	2828.93	1778.8	2962.03	1806.26	-0.707187	0.0516497	0.247241	0.739536	0.403473	0.673298	-0.712184	0.0466314	0.213836	-0.669355	0.0230453	0.132918	1.62255	7.52268e-05	0.0010142	-0.192966	0.7878	1	0.0663297	0.831486	1	0.287233	0.226922	1	-0.167792	0.45019	1	0.0221013	0.885896	1	-0.595785	0.167688	0.567179	-0.687011	0.0155398
circ_000055	541.77	145.325	73.33	205.68	602.245	132.725	493.55	153.86	669.13	173.7	550.78	129.095	702.045	117.035	-1.8984	0.000132201	0.00171568	1.48793	0.0877702	0.242573	-1.68158	0.000562154	0.00539199	-2.09304	3.13419e-08	6.3915e-07	3.03788	2.52176e-08	8.29955e-07	0.43909	0.0422434	0.576468	0.350087	0.360585	1	-0.631961	0.395376	1	0.17498	0.795265	1	-0.141493	0.768494	1	-2.18191	0.000466543	0.00616695	-1.94569	9.68001e-06
circ_000062	7.325	46.605	0.001	49.505	0.001	30.805	9.64	5.37	0.001	79.125	0.001	33.25	9.295	14.215	2.66958	0.202858	0.583592	15.5953	0.00447743	0.0210767	-0.844111	1	1	15.0211	0.121435	0.443705	0	1	1	-13.2348	0.510268	1	13.1822	0.529981	1	-0.68441	0.797515	1	3.88114	0.00360604	0.183897	-1.22594	0.669164	1	14.9109	0.110867	0.463626	16.2718	7.28733e-05
circ_000067	689.785	281.115	307.815	328.8	697.44	505.435	836.11	427.13	824.61	332.14	792.95	547.85	763.56	488.32	-1.29499	0.000949835	0.00981776	0.0951468	0.452633	0.708309	-0.969018	0.0148823	0.0904174	-0.533449	0.298031	0.729501	1.18001	0.0841868	0.293473	-0.0199808	0.442857	1	-0.0544884	0.914057	1	0.620315	0.0788682	0.918889	-0.362884	0.227735	1	-0.165954	0.555008	1	-0.464544	0.465197	0.872425	-1.31192	3.62136e-05
circ_000068	97.635	43.405	0.001	0.001	0.001	59.475	0.001	65.205	141.485	122.84	122.345	14.43	106.945	32.515	-1.16954	0.429401	0.806335	0	1	1	15.9927	0.0189897	0.108742	-3.08381	0.105141	0.409197	0	1	1	17.1103	2.86759e-06	0.000401104	-0.194086	0.926281	1	15.86	0.0240392	0.522262	0.913726	0.430761	1	1.17203	0.521579	1	15.86	0.029266	0.19232	-0.203869	0.640383
circ_000072	481.605	0.001	858.465	0.001	230.25	0.001	639.4	0.001	306.81	10.62	428.035	0.001	351.57	0.001	-18.8775	4.7147e-23	3.67118e-21	-19.7114	8.37822e-40	1.9404e-37	-19.2864	1.21291e-24	8.72539e-23	-18.7074	3.12299e-19	1.32091e-17	-1.89856	7.32626e-09	2.82693e-07	-1.05937	0.0331244	0.500895	-0.283917	0.566221	1	0	1	1	13.3745	0.379716	1	0	1	1	-17.8128	1.25169e-11	4.96359e-10	-4.85249	4.99284e-13
circ_000074	469.125	751.645	662.2	790.885	532.54	711.125	646.75	909.745	430.45	1221.05	762.395	1073.01	772.075	1242.25	0.680079	0.0462114	0.231063	0.256201	0.541878	0.784368	0.492254	0.032719	0.164811	0.493046	0.0708261	0.302934	-0.314377	0.07182	0.263497	-0.587362	0.450585	1	0.0182023	0.966279	1	-0.153365	0.925626	1	0.424582	0.205809	1	0.211299	0.578511	1	0.417213	0.183567	0.606614	1.5042	2.87171e-05
circ_000078	2.1	74.805	0.001	98.645	0.001	92.035	0.001	56.775	0.001	55.04	0.001	86.82	0.001	30.475	5.15467	0.000276672	0.00319953	16.59	0.000168663	0.00123615	15.793	0.00369525	0.0291318	16.4057	0.000420578	0.00421315	0	1	1	0	1	1	0	1	1	-0.100063	1	1	-0.0447753	1	1	-1.5104	0.115807	1	16.4899	3.95947e-05	0.000669615	15.7482	0.00184796
circ_000086	6267.35	4975.03	1129.07	5400.48	7109.4	4808.02	8848.69	6371.23	6694.1	6471.95	10230.1	7791.06	12239.4	9100.66	-0.333148	0.424336	0.802833	2.25795	3.33166e-08	4.59294e-07	-0.473893	0.279661	0.658283	-0.392927	0.165334	0.534878	2.65459	4.83745e-11	2.16524e-09	-0.402576	0.745909	1	0.258719	0.327128	1	-0.167645	0.770517	1	0.0226285	0.873666	1	0.22415	0.528987	1	-0.564284	0.228515	0.679051	-0.0486886	0.645103
circ_000088	433.94	88.175	209.935	124.15	344.565	90.96	410.165	90.175	336.37	83.505	522.02	71.345	465.69	50.65	-2.29905	9.95928e-07	1.84642e-05	-0.757858	0.0119137	0.0498052	-2.1854	5.60391e-06	8.06262e-05	-2.87122	2.44768e-09	6.21167e-08	0.714833	0.337779	0.683498	-0.286155	0.949004	1	-0.164735	0.684466	1	-0.44878	0.603224	1	-0.110865	0.871616	1	-0.49425	0.615022	1	-1.92147	0.000724073	0.00905092	-2.01011	1.25543e-05
circ_000099	473.29	279.475	2.44	326.925	697.555	342.88	1026.03	456.71	535.305	203.88	449.32	229.1	208.075	142.415	-0.760005	0.165902	0.509793	7.06593	7.55999e-10	1.28543e-08	-1.16772	0.00204273	0.0169149	-0.971766	0.188242	0.57022	8.15928	7.2386e-19	9e-17	-0.93864	0.0459559	0.590357	-1.11064	0.342837	1	0.0687441	0.855173	1	-1.16356	0.000616077	0.053267	-0.685876	0.290781	1	-1.0246	0.0775431	0.376264	-1.39264	4.07696e-05
circ_000104	520.325	470.795	113.415	666.345	487.13	406.71	494.485	519.405	215.385	483.155	369.87	471.56	344.575	583.015	-0.144314	0.854557	1	2.55466	0.00011299	0.000866504	0.0709331	0.478407	0.835155	0.350423	0.308472	0.746347	2.1027	0.00318382	0.0234387	-1.19901	0.0475942	0.591754	-0.1022	0.854971	1	-0.712269	0.166169	1	-0.104374	0.618207	1	0.306092	0.62144	1	-0.260306	0.763492	0.990988	1.16557	0.0061164
circ_000113	71.37	4.9	26.245	0.001	121.62	7.12	81.125	0.001	102.23	3.325	50.705	0.001	89.585	4.94	-3.86446	0.014594	0.0958455	-14.6798	0.0206187	0.0790611	-16.3079	0.000247925	0.00265895	-15.6298	0.0492869	0.232585	2.21227	0.0273319	0.129595	0.3336	0.615594	1	0.821129	0.594393	1	12.7977	0.646631	1	11.6991	0.703757	1	12.2703	0.740902	1	-4.09436	0.0011921	0.0141331	-4.94232	0.0172134
circ_000117	3160.85	2322.38	1151.99	2038.54	2945.2	2077.3	2149.11	1649.81	2200.09	1598.49	3160.54	1724.38	3635.41	1952.79	-0.444709	0.306108	0.70841	0.823405	0.273948	0.53406	-0.381436	0.453265	0.820295	-0.874089	0.0033495	0.0265634	1.35423	0.00305685	0.0226531	0.0338266	0.359235	1	0.201947	0.541824	1	0.0271803	0.676784	1	-0.0455857	0.73154	1	0.179451	0.707015	1	-0.50365	0.266193	0.727131	-0.460848	0.134564
circ_000118	194.08	34.33	97.26	46.345	139.18	27.95	175.975	18.575	105.73	32.9	232.845	42.405	169.695	30.74	-2.49911	0.000243794	0.00290563	-1.06943	0.0262093	0.0957424	-3.24394	0.000116691	0.00130399	-2.45706	0.000857376	0.00809193	0.517033	0.881076	1	-0.734986	0.40153	1	-0.456426	0.41352	1	-0.729565	0.711195	1	0.824725	0.613066	1	-0.464117	0.755002	1	-2.31603	0.0679257	0.344117	-1.68423	0.0229373
circ_000122	1771.32	2020.39	790.215	2030.97	2683.85	2738.91	3328.05	2392.65	2200.03	3112.32	2997.94	2442.26	3800.79	2579.86	0.189809	0.381876	0.774229	1.36186	0.0364009	0.125081	-0.476066	0.262106	0.642861	-0.295755	0.358649	0.789167	1.76399	0.00102333	0.00916086	-0.597155	0.30248	1	0.342328	0.267184	1	0.431429	0.0747757	0.903369	0.379381	0.335333	1	0.0790788	0.940773	1	0.0292978	0.660897	0.983056	0.50047	0.279365
circ_000125	204.675	179.275	143.9	191.84	420.55	279.505	240.48	153.805	293.145	196.425	347.69	234.245	456.655	320.565	-0.191161	0.868097	1	0.414837	0.927131	1	-0.644815	0.371609	0.740206	-0.569783	0.257196	0.687864	1.54721	0.00550392	0.0371486	0.285698	0.140516	0.969973	0.393303	0.346539	1	0.542971	0.24655	1	0.352876	0.52976	1	0.452599	0.397513	1	-0.589403	0.260307	0.722361	-0.577636	0.0876721
circ_000133	99.82	275.385	106.885	392.725	57.325	174	49.09	207.185	48.175	164.545	56.84	322.56	119.88	397.98	1.46405	0.00540955	0.0432764	1.87746	0.0140294	0.0576099	2.07742	0.000270485	0.00285623	2.50459	3.67349e-06	5.74675e-05	-0.898823	0.0965047	0.32545	-0.0271445	0.815453	1	1.07661	0.199395	1	-1.17443	0.0988582	0.952115	-0.332437	0.418434	1	0.303128	0.555957	1	1.60185	0.0338098	0.21063	1.77213	0.0132445
circ_000135	31.8	32.865	120.57	29.945	10.835	48.575	8.84	30.58	3.78	22.73	38.03	23.31	36.665	51.78	0.0475252	0.965176	1	-2.00948	0.011436	0.0484814	1.79047	0.378717	0.743863	-0.706189	0.765056	0.98657	-3.4761	5.05581e-05	0.000692318	-1.22566	0.800529	1	-0.0527344	1	1	0.697899	0.618851	1	-0.427991	0.782318	1	1.15145	0.538847	1	2.16451	0.119439	0.476926	2.58814	0.245442
circ_000138	90.04	201.735	88.66	119.705	154.28	79.49	99.94	344.85	66.39	385	131.485	177.965	185.73	183.735	1.16382	0.0203394	0.123882	0.433128	1	1	1.78683	1.41923e-05	0.000187762	0.436695	0.477952	0.857642	0.799196	0.503403	0.817334	-0.590096	0.726223	1	0.498309	0.452889	1	-0.590638	0.489162	1	0.158889	0.879116	1	0.0460329	0.969224	1	-0.956706	0.221947	0.670806	2.53582	2.43267e-05
circ_000140	118.55	21.2	105.055	19.53	172.305	9.675	251.62	0.001	143.665	0.001	171.735	32.905	178.29	10.39	-2.48336	0.0193184	0.120021	-2.42738	0.00244562	0.0125311	-17.9409	2.90629e-12	9.29207e-11	-2.38381	0.0481681	0.231126	0.71382	0.517759	0.830046	-0.808538	0.245822	1	0.0540417	0.939427	1	-1.01336	0.711739	1	0	1	1	-1.66311	0.490618	1	-4.15456	1.62654e-05	0.000292269	-17.1323	2.28224e-08
circ_000148	67.28	0.001	77.175	0.001	80.94	0.001	140.705	0.001	50.925	0.001	49.87	0.001	159.15	0.001	-16.0379	0.000343703	0.00386005	-16.2358	9.11122e-05	0.000717741	-17.1023	3.5493e-06	5.37532e-05	-15.6059	0.0102643	0.0662252	0.0687193	0.822744	0.999621	-1.46623	0.10711	0.881298	1.67414	0.0574102	0.621943	0	1	1	0	1	1	0	1	1	-16.3046	0.000266797	0.00383521	-15.6361	0.00221516
circ_000155	228.81	285.325	75.135	197.3	132.455	566.585	473.495	543.415	311.9	506.275	198.6	565.53	156.905	720.95	0.318456	0.426849	0.802833	1.39283	0.106773	0.272942	0.198705	0.360719	0.733403	1.50974	0.000321239	0.00339681	0.817945	0.582642	0.870462	-0.602266	0.34567	1	-0.339974	0.601447	1	1.5219	0.000126102	0.012107	-0.102133	0.618452	1	0.350296	0.583114	1	2.09679	8.23069e-06	0.000155169	0.698838	0.0884924
circ_000165	40.21	29.965	30.87	0.001	56.985	0.001	0.001	0.001	79.115	0.001	25.645	0.001	210.07	22.785	-0.424276	0.870575	1	-14.9139	0.0669325	0.199249	0	1	1	-14.6464	0.210335	0.608252	0.884377	0.796145	0.984404	16.2717	0.000122466	0.0114199	3.03412	0.00421198	0.110815	0	1	1	0	1	1	14.4758	0.26321	1	-15.7983	0.0438286	0.253229	-16.2717	6.58128e-05
circ_000176	180.225	303.645	158.2	229.82	146.825	157.96	232.44	214.26	121.02	287.275	174.725	470.655	155.155	325.865	0.752586	0.1033	0.391733	0.538755	0.878499	1	-0.117496	0.970261	1	1.42958	4.89178e-05	0.000620713	-0.107652	0.505952	0.817334	-0.941613	0.138877	0.969973	-0.171376	0.819839	1	-0.540945	0.42157	1	0.42307	0.337623	1	-0.530396	0.119967	1	0.105462	0.778326	0.998967	1.24719	0.00460038
circ_000178	335.675	293.165	86.235	316.55	368.95	147.415	363.235	289.855	308.095	234.44	466.555	232.415	281.395	297.445	-0.195352	0.776897	0.982194	1.87609	0.00400238	0.0192313	-0.325572	0.63429	0.938391	-1.00534	0.0149377	0.0917145	2.09708	0.000505999	0.00514739	-0.237528	1	1	-0.72945	0.0831935	0.767429	-1.10255	0.0482865	0.732897	-0.306113	0.364683	1	0.35592	0.551725	1	-1.32354	0.0146983	0.112481	-0.394157	0.242984
circ_000186	17.1	80.165	21.28	75.575	2.105	68.915	24.95	87.78	10.845	91.66	10.07	35.465	2.755	139.92	2.22898	0.0224298	0.132985	1.82841	0.167917	0.384285	1.81485	0.0510239	0.22763	1.81633	0.311129	0.749178	-3.33761	0.15333	0.426807	-1.20201	0.597898	1	-1.86994	0.645202	1	-0.133091	0.958058	1	0.0624	1	1	1.98013	0.0272947	0.716161	5.03293	0.00248037	0.0262246	3.07926	0.00391681
circ_000187	499.39	367.525	129.425	499.935	457.02	337.99	512.05	373.955	357.185	343.1	629.995	557.57	622.045	646.97	-0.442325	0.316445	0.715467	1.94962	0.000246175	0.00168681	-0.45342	0.399351	0.767558	-0.176187	0.674326	0.955308	1.82014	0.000448199	0.00464384	-0.519613	0.560023	1	-0.0183214	0.973102	1	-0.56476	0.234707	1	-0.124236	0.60835	1	0.214546	0.60389	1	-0.435277	0.444728	0.856935	-0.0580424	0.672116
circ_000195	82.89	2.405	164.525	0.001	37.46	0.001	52.255	0.001	73.11	0.001	84.295	4.01	98.955	0.001	-5.10709	0.000665032	0.00699781	-17.3279	8.72964e-12	1.80516e-10	-15.6733	0.00729935	0.0525097	-4.39377	0.00943343	0.0612101	-2.13488	0.000281604	0.00318298	0.4845	0.569506	1	0.231326	0.808968	1	0	1	1	0	1	1	-11.9694	0.739705	1	-15.1931	0.0252415	0.171233	-16.1578	0.000223286
circ_000199	106.775	22.18	150.36	30.67	47.925	28.89	202	26.77	30.345	8.445	281.345	30.245	135.035	13.565	-2.26724	0.0189559	0.118399	-2.29352	7.60189e-05	0.000633308	-2.91567	8.18612e-05	0.000946755	-3.21757	1.30043e-07	2.47515e-06	-1.64957	0.00441706	0.0314821	-2.73482	0.00033692	0.0238186	-1.05901	0.0389727	0.496093	-0.086258	1	1	-1.66445	0.375407	1	-1.15681	0.51327	1	-0.730208	0.617576	0.954174	-1.84529	0.230893
circ_000200	1133.46	1492.93	1163.29	987.165	668.685	1411.74	733.05	1366.05	596.8	1403.14	523.78	877.7	636.51	951.48	0.397407	0.135816	0.458477	-0.236848	0.0302392	0.107745	0.898027	0.000282418	0.00295512	0.744767	0.00848004	0.0566328	-0.798812	0.00249556	0.0191269	-0.296664	0.989684	1	0.281222	0.430835	1	0.516116	0.0461451	0.732897	0.0386487	0.91865	1	0.116445	0.854313	1	1.07808	0.00175705	0.0194289	1.23334	0.00118946
circ_000205	84.955	28.735	155.33	97.605	68.095	0.001	68.595	27.215	5.84	43.76	89.9	20.415	33.48	6.895	-1.56389	0.294648	0.691061	-0.67031	0.0304473	0.108153	-1.3337	0.281642	0.658283	-2.13869	0.072615	0.308276	-1.18972	0.0337271	0.150962	-3.55406	0.0226411	0.395865	-1.42502	0.16069	1	-16.5747	3.08916e-05	0.00380309	0.685211	0.675463	1	-1.56601	0.562427	1	-16.0553	0.00258565	0.0267883	2.90557	0.155665
circ_000207	487.66	559.08	455.685	668.68	2061.84	5119.57	410.99	259.77	1499.69	1254.66	525.115	781.35	2005.58	2031.79	0.197179	0.443279	0.821164	0.553279	0.810126	0.967397	-0.661868	0.31892	0.702249	0.573336	0.114877	0.430681	2.17782	5.53077e-08	1.62867e-06	1.86749	1.86278e-10	6.94816e-08	1.93331	2.67215e-06	0.00073818	2.93664	8.14325e-15	9.02272e-12	2.27199	3.068e-08	1.72422e-05	1.37871	1.21697e-05	0.00285263	1.31209	0.000274142	0.00389214	-0.257373	0.273381
circ_000208	316.25	195.17	83.525	171.525	286.625	213.105	360.05	275.465	414.985	247.9	426.665	261.09	521.17	225.73	-0.696334	0.172892	0.5208	1.03814	0.290985	0.553302	-0.386328	0.544555	0.890317	-0.708557	0.0587973	0.264834	1.77888	0.00524193	0.035986	0.204862	0.178047	1	0.28865	0.463251	1	0.313146	0.444176	1	-0.152111	0.602423	1	-0.209949	0.554377	1	-0.4276	0.532106	0.915301	-0.743301	0.0227025
circ_000214	409.355	44.295	316.195	46.905	330.85	30.615	306.625	66.255	449.61	72.885	424.65	74.615	735.03	58.05	-3.20814	7.21212e-08	1.65172e-06	-2.753	8.7793e-11	1.63975e-09	-2.21037	0.000499296	0.00487174	-2.50874	4.07858e-06	6.29423e-05	0.0653627	0.638605	0.910317	0.552199	0.0407261	0.562624	0.791529	0.0563303	0.621943	-0.615503	0.653414	1	0.137593	0.91347	1	-0.36217	0.695091	1	-3.43387	3.01147e-06	6.18427e-05	-2.62498	8.23316e-10
circ_000220	84.365	76.665	292.6	135.905	109.905	87.165	95.065	61.03	56.38	90.295	121.93	82.28	116.59	48.98	-0.138077	0.943612	1	-1.10633	0.000402907	0.00260652	-0.639396	0.517451	0.863254	-0.567439	0.569111	0.896018	-1.41267	0.000795411	0.00733873	-0.753731	0.580321	1	-0.0646091	0.965344	1	-0.640778	0.419986	1	0.565128	0.632664	1	-0.748349	0.402789	1	-0.334436	0.812979	1	0.679463	0.587904
circ_000221	106.205	88.905	0.001	78.83	256.12	92.11	46.555	109.235	119.01	89.42	100.365	135.695	48.755	38.46	-0.256515	0.821454	1	16.2665	0.000353051	0.00229682	1.23043	0.0726796	0.297702	0.435111	0.441574	0.84692	17.9665	1.99995e-07	4.66239e-06	1.35407	0.028467	0.442425	-1.04163	0.42834	1	0.224613	0.75961	1	-0.288766	0.591271	1	-1.81894	0.0950914	1	-1.47539	0.137977	0.516721	-0.412413	0.400017
circ_000226	315.09	0.001	1.99	4.63	295.13	0.001	546.865	0.001	310.205	8.85	610.08	0.001	596.16	5.105	-18.2654	1.18846e-15	5.55247e-14	1.21824	1	1	-19.0608	6.43724e-24	4.35839e-22	-19.2186	1.01022e-22	4.61468e-21	7.21244	2.16409e-11	1.05288e-09	-0.817963	0.128692	0.953682	-0.0332989	0.95568	1	-12.1768	0.768293	1	13.1115	0.446784	1	12.3177	0.660209	1	-18.171	5.08563e-13	2.6584e-11	-5.1314	2.98056e-14
circ_000231	444.025	213.355	1046.75	349.58	468.365	228.055	319.82	314.95	444.645	404.055	447.89	322.58	485.175	633.87	-1.05738	0.0213306	0.128423	-1.58222	1.02387e-09	1.66991e-08	-0.0221373	0.851683	1	-0.473487	0.312508	0.749758	-1.16021	0.000198353	0.00238664	0.475394	0.0600413	0.67349	0.115361	0.795344	1	-0.616241	0.282882	1	0.359429	0.406172	1	0.97453	0.0117686	0.418355	-1.03825	0.0569916	0.303427	-0.138102	0.483709
circ_000243	79.855	36.68	64.57	17.6	6.74	9.37	67.87	5.295	14.785	12.65	31.515	36.34	25.305	15.44	-1.12239	0.257504	0.640223	-1.87529	0.0193661	0.075003	-3.68007	0.0139641	0.0878287	0.20552	0.873864	1	-3.26004	0.00784833	0.0496174	-2.19864	0.11556	0.913327	-0.316616	0.919968	1	-0.909454	0.799125	1	1.25643	0.600335	1	-1.23489	0.401502	1	0.4753	0.894268	1	-0.224997	1
circ_000246	42.75	0.001	102.98	0.001	67.61	0.001	198.525	0.001	269.48	1.77	62.63	0.001	76.82	0.001	-15.3836	0.00669312	0.0521171	-16.652	8.9933e-08	1.11981e-06	-17.599	2.08444e-09	4.70429e-08	-15.9346	0.00821629	0.0558512	-0.607056	0.176896	0.467958	0.440858	0.0708129	0.740117	0.294628	0.791607	1	0	1	1	10.7895	1	1	0	1	1	-16.0449	0.0010013	0.012121	-7.25029	1.07163e-16
circ_000254	25.53	0.001	17.795	0.001	59.165	0.001	19.855	0.001	20.105	3.8	0.001	0.001	56.905	0.001	-14.6399	0.0920378	0.371973	-14.1192	0.158161	0.369255	-14.2772	0.29043	0.665905	0	1	1	1.73327	0.367935	0.709404	0.018052	0.894939	1	15.7963	0.00557694	0.133968	0	1	1	11.8918	0.708305	1	0	1	1	-15.8525	0.00427159	0.0416299	-2.40348	0.396432
circ_000261	28.71	41.33	100.22	24.78	18.145	23.855	54.8	10.57	44.455	8.595	11.625	0.001	56.355	18.07	0.525636	0.62981	0.913812	-2.01592	0.00201906	0.0107251	-2.3742	0.115655	0.403392	-13.5049	0.422252	0.841231	-2.46553	0.00351833	0.0254001	-0.30183	1	1	2.27731	0.157323	1	-0.0548845	1	1	-0.298406	1	1	14.1413	0.342254	1	0.39472	0.85061	1	-2.37078	0.0918925
circ_000262	72984.3	182757	158032	167655	56797.8	160709	55546.6	105031	34987.9	105872	51371.3	98156.6	40136.5	106224	1.32427	8.67635e-06	0.000133342	0.0852736	0.141302	0.338073	0.919044	0.000249493	0.00265895	0.934122	8.29349e-05	0.00101841	-1.47632	8.72182e-09	3.25324e-07	-0.666843	0.192272	1	-0.356049	0.194754	1	-0.0610472	0.903116	1	0.0114999	0.856352	1	0.113949	0.864531	1	1.50054	4.52266e-06	8.66844e-05	1.59739	2.15876e-06
circ_000271	643.055	0.001	785.67	0.001	530.38	0.001	658.295	0.001	389.075	0.001	649.435	0.001	603.725	0.001	-19.2946	2.73069e-30	4.55635e-28	-19.5836	6.00146e-39	1.15828e-36	-19.3284	6.35094e-25	4.87329e-23	-19.3088	5.65092e-24	2.6889e-22	-0.566897	0.0122724	0.0709069	-0.758686	0.168819	1	-0.105294	0.81703	1	0	1	1	0	1	1	0	1	1	-19.0167	3.7053e-21	4.73455e-19	-18.5697	5.55749e-25
circ_000275	0.001	17.925	10.005	68.67	32.06	31.495	0.001	90.275	0.001	77.46	37.61	56.4	0.001	28.255	14.1297	0.0924719	0.372254	2.77896	0.0756683	0.21797	16.462	7.44769e-05	0.000887035	0.584579	0.710444	0.958452	1.68005	0.645421	0.913054	0	1	1	-15.1988	0.0838774	0.767429	-1.12456	0.310987	1	-0.220875	0.699681	1	-0.997189	0.506805	1	-0.0256516	0.960451	1	16.2412	8.82945e-05
circ_000280	29.085	230.085	34.01	286.41	22.5	440.345	34.79	278.38	28.575	518.915	38.49	386.385	61.23	345.3	2.98382	2.8131e-06	4.83191e-05	3.07405	1.21892e-05	0.000111142	3.00031	1.9017e-08	3.84009e-07	3.32748	2.59547e-09	6.44355e-08	-0.596034	0.495815	0.808771	-0.283919	1	1	0.669755	0.56294	1	0.620552	0.0914427	0.941221	0.898443	0.0254006	0.522615	-0.162189	0.626918	1	4.29064	2.28955e-12	1.05319e-10	4.18267	1.25431e-14
circ_000281	72.835	4.685	168.185	0.001	133.475	0.001	125.215	23.875	100.795	29.75	178.27	4.8	135.24	7.505	-3.95851	0.00447427	0.0365451	-17.3597	8.45135e-11	1.60437e-09	-2.39083	0.00989993	0.0686435	-5.21489	4.96716e-06	7.36688e-05	-0.333479	0.32657	0.673812	-0.312983	1	1	-0.398542	0.563374	1	0	1	1	0.317389	0.918868	1	0.644818	1	1	-17.0262	2.139e-06	4.64123e-05	-1.76046	0.0253009
circ_000287	151.28	162.955	86.995	221.58	115.155	118.11	184.555	179.31	98.515	277.43	249.405	336.575	190.54	266.94	0.107252	0.707441	0.946985	1.34882	0.0803522	0.226394	-0.0415949	0.869394	1	0.432438	0.237532	0.657241	0.404573	0.939746	1	-0.905636	0.243525	1	-0.388396	0.453309	1	-0.907697	0.141785	1	0.629668	0.393144	1	-0.334413	0.400771	1	0.0365541	0.83289	1	1.49371	0.00142583
circ_000290	28.325	52.38	313.315	18.995	70.54	0.001	16.62	23.37	55.36	25.38	77.445	0.001	0.001	97.125	0.88694	0.418418	0.801167	-4.04392	7.96805e-13	1.77442e-11	0.491737	0.873511	1	-16.2409	0.00189778	0.016544	-2.1511	5.87181e-06	9.95538e-05	1.73592	0.26083	1	-16.2409	0.00136287	0.056003	-14.2133	0.157179	1	0.119034	1	1	16.5676	0.00024637	0.0301666	-16.1062	0.000605629	0.00782555	-1.12515	0.488006
circ_000306	136.89	13.32	288.66	36.425	112.175	14.585	184.75	12.355	49.325	9.155	266.925	7.925	136.875	24.05	-3.36135	0.00102999	0.0104611	-2.98637	1.98262e-09	3.10253e-08	-3.90241	7.14772e-06	0.00010033	-5.07388	1.64355e-08	3.47581e-07	-1.36362	0.00488697	0.0341783	-1.90518	0.0121699	0.28978	-0.963575	0.070917	0.737231	-1.32044	0.472141	1	-0.432463	0.89032	1	1.60155	0.662446	1	-2.94319	0.0300319	0.195123	-2.42969	0.0908362
circ_000318	18.4	24.46	160.38	11.73	25.975	29.355	21.64	8.78	23.775	12.46	49.505	21.28	35.23	35.435	0.410719	0.778353	0.982194	-3.77322	4.15146e-07	4.66737e-06	-1.30141	0.639237	0.944496	-1.21808	0.404829	0.835495	-2.6263	0.000380952	0.00402155	0.135745	0.78945	1	-0.49077	0.779312	1	1.3234	0.417816	1	0.505011	1	1	0.735677	0.780036	1	0.176483	0.848189	1	-0.932141	0.555325
circ_000323	256.39	303.685	57.72	426.69	392.48	412.305	389.135	379.535	387.04	360.865	435.68	425.15	469.465	548.62	0.244236	0.432861	0.811048	2.88605	2.35047e-07	2.77739e-06	-0.0360378	0.73188	0.980717	-0.0352969	0.979909	1	2.76548	3.25677e-06	5.87795e-05	-0.00778807	0.443021	1	0.107749	0.79155	1	-0.0494763	0.916199	1	-0.0727737	0.701136	1	0.367835	0.355841	1	0.0710928	0.638749	0.965581	-0.101023	0.570433
circ_000327	30.625	45.32	54	17.33	0.001	23.835	66.74	65.41	15.17	20.725	32.695	41.755	30.045	29.42	0.565438	0.660005	0.931316	-1.63969	0.0555181	0.17354	-0.0290405	0.947471	1	0.352879	0.833064	1	-15.7207	0.00063141	0.00623338	-2.13733	0.17066	1	-0.121945	1	1	0.45981	0.766841	1	-1.65814	0.122346	0.948393	-0.505152	0.750677	1	14.5408	0.0741058	0.367335	0.450151	0.937524
circ_000336	3.87	0.001	84.94	0.001	0.001	19.515	0.001	0.001	0.001	0.001	6.445	18.745	6.535	0.001	-11.9181	0.71395	0.946985	-16.3742	2.19317e-06	2.18939e-05	0	1	1	1.54025	0.578827	0.901334	-16.3742	1.03835e-05	0.00016365	0	1	1	0.0200069	1	1	14.2523	0.255277	1	0	1	1	-14.1942	0.171941	1	14.2523	0.23322	0.689467	0	1
circ_000344	592.455	653.065	1802.95	692.295	844.11	741.415	609.215	853.965	530.78	821.8	745.05	765.41	921.45	949.915	0.140521	0.524974	0.873462	-1.3809	7.03851e-09	1.04495e-07	0.487225	0.0378565	0.183851	0.0388955	0.73403	0.970211	-1.09486	2.13216e-05	0.000318119	-0.198837	0.773064	1	0.306569	0.416804	1	0.0988944	0.588655	1	-0.0553896	0.69814	1	0.311566	0.463493	1	-0.18715	0.83207	1	0.630673	0.105652
circ_000345	157.99	143.92	307.67	159.34	92.22	204.515	195.375	149.315	110.765	212.715	63.065	220.3	96.7	246.265	-0.134566	0.912945	1	-0.949275	0.000720888	0.00439362	-0.387887	0.619917	0.930507	1.80456	0.0130259	0.0817337	-1.73823	4.10622e-05	0.000574357	-0.818744	0.343616	1	0.616676	0.525204	1	0.360098	0.554908	1	0.510563	0.328944	1	0.160742	0.785083	1	1.14906	0.0880394	0.398603	0.94142	0.102433
circ_000351	97.28	55.62	121.62	36.04	182.1	35.005	200.395	49.255	125.275	45.475	280.685	106.27	279.63	67.315	-0.806539	0.390683	0.777372	-1.75471	0.00190882	0.0101862	-2.0245	0.00432572	0.0331927	-1.40122	0.00707382	0.0489594	0.58235	0.646609	0.91358	-0.677748	0.422602	1	-0.00543282	1	1	-0.042038	1	1	-0.115197	0.886663	1	-0.658734	0.430675	1	-2.3791	0.00307412	0.0310108	-1.46195	0.0245632
circ_000355	3420.07	3470.8	2976.22	2557.7	3570.22	2685.01	3733.93	2795.74	3021.89	2012.81	2730.83	1266.7	3143.94	1323.76	0.0212423	0.724961	0.954289	-0.218637	0.0234638	0.0875817	-0.417467	0.358825	0.733403	-1.10826	0.000102845	0.00121082	0.262532	0.856463	1	-0.305243	0.959286	1	0.203234	0.519152	1	0.0700832	0.66455	1	-0.474019	0.0483958	0.745162	0.0635556	0.949573	1	-0.411086	0.396229	0.836338	-0.586243	0.0276804
circ_000358	142.63	260.43	399.92	211.585	188.66	175.295	194.63	190.93	150.83	226.045	183.88	288.19	133.765	196.24	0.868618	0.0464529	0.231063	-0.918474	0.000464215	0.00295363	-0.0276903	0.773252	1	0.648256	0.098219	0.390823	-1.08392	0.00290483	0.0218155	-0.367811	0.914482	1	-0.459064	0.467949	1	-0.271453	0.720316	1	0.243566	0.672141	1	-0.554401	0.155137	1	-0.106004	1	1	0.583687	0.24796
circ_000359	64.605	44.66	155.415	29.315	48.665	42.065	57.905	93.645	71.17	65.17	46.935	97.215	80.525	72.065	-0.532663	0.629135	0.913812	-2.40641	9.19469e-05	0.000719422	0.693514	0.292049	0.666417	1.05051	0.228476	0.643101	-1.67517	0.00384053	0.0275484	0.297581	0.552798	1	0.778773	0.435764	1	0.520981	0.652392	1	-0.522994	0.461822	1	-0.43188	0.532677	1	-0.210264	0.953873	1	-0.127061	0.823068
circ_000368	37.44	47.615	76.235	56.995	0.001	16.525	12.375	42.535	0.001	49.64	0.001	35.645	15.285	54.075	0.346836	0.744233	0.964985	-0.419618	0.323258	0.594179	1.78122	0.170163	0.506093	15.1214	0.046922	0.228021	-16.2182	0.000136721	0.001719	-13.5951	0.44889	1	13.8998	0.221065	1	-1.78619	0.157145	1	0.222853	0.93847	1	0.601262	0.67879	1	14.0124	0.135859	0.513939	15.5992	0.00290826
circ_000371	18.91	54.675	25.005	67.01	5.165	134.445	10.385	49.48	21.305	94.085	30.425	49.285	16.225	101.495	1.53173	0.149667	0.481574	1.42216	0.273842	0.53406	2.25234	0.112524	0.39792	0.695891	0.593925	0.917811	-2.27538	0.214797	0.521764	1.03669	0.469983	1	-0.907039	0.549769	1	1.00457	0.139641	1	0.927119	0.317943	1	1.04219	0.352552	1	4.7021	5.56329e-05	0.000913969	2.14277	0.0344749
circ_000373	14.595	0.001	63.56	0.001	0.001	7.085	16.395	0.001	0.001	4.22	0.001	50.88	15.63	17.69	-13.8332	0.248039	0.631544	-15.9558	6.17477e-05	0.00052885	-14.001	0.352485	0.733403	15.6348	0.0084448	0.0566328	-15.9558	0.000207981	0.00247586	-14.001	0.35303	1	13.932	0.358323	1	12.7906	0.647993	1	12.043	0.707574	1	-1.52416	0.245008	1	12.7906	0.504254	0.908127	12.043	0.696371
circ_000378	47.745	0.001	4.465	0.001	23.24	0.001	40.53	0.001	55.2	0.001	27.655	3.56	17.865	0.001	-15.5431	0.00330627	0.0283989	-12.1244	0.585007	0.828165	-15.3067	0.016759	0.0984164	-2.95759	0.27755	0.712238	2.37988	0.37597	0.715495	0.445678	0.529056	1	-0.630404	0.734091	1	0	1	1	0	1	1	-11.7977	0.738229	1	-14.5043	0.0830355	0.389759	-15.7524	0.00104985
circ_000387	198.62	139.325	1304.59	261.755	194.24	150.335	194.33	122.005	154.46	206.265	231.4	260.92	269.335	270.855	-0.511557	0.425878	0.802833	-2.31731	6.43248e-14	1.58485e-12	-0.671568	0.295206	0.671506	0.173219	0.61264	0.920573	-2.74768	1.54384e-15	1.32889e-13	-0.331275	0.9125	1	0.219013	0.687436	1	-0.800036	0.173343	1	0.757559	0.137016	0.980928	0.0539132	1	1	-0.369659	0.66355	0.984622	0.417266	0.453935
circ_000388	8.375	11.905	94.28	2.315	15.645	7.575	7.59	21.245	10.21	0.001	67.435	23.605	20.56	7.9	0.507407	0.799648	0.991809	-5.34787	1.06352e-05	9.77426e-05	1.48495	0.541593	0.887997	-1.51441	0.208495	0.605855	-2.59125	0.00287962	0.0217723	0.427811	0.89681	1	-1.71366	0.166793	1	1.71023	0.686081	1	-14.3748	0.114724	0.934422	-1.57917	0.561405	1	-1.04638	0.704121	0.990988	-13.3177	0.198784
circ_000392	49.91	34.31	84.76	35.7	8.895	0.001	48.685	10.3	14.84	26.73	29.92	30.2	19.52	6.41	-0.5407	0.727493	0.955807	-1.24746	0.0321724	0.113584	-2.24083	0.213552	0.566356	0.0134384	1	1	-3.25232	0.00158402	0.0133047	-1.71399	0.341573	1	-0.616157	0.78666	1	-15.1236	0.0239584	0.522262	1.37582	0.525999	1	-2.23615	0.379139	1	-13.1188	0.286631	0.758402	0.848969	0.717742
circ_000395	42.15	22.8	11.22	0.001	118.425	68.58	27.115	0.001	171.14	30.49	15.59	41.36	0.001	0.001	-0.886499	0.569242	0.890657	-13.4538	0.32848	0.599969	-14.7268	0.208829	0.557685	1.40762	0.474018	0.856696	3.39983	0.0817288	0.290242	2.65801	0.000665742	0.0372482	-13.9283	0.341211	1	16.0655	0.000802615	0.0635212	14.896	0.0302903	0.549133	-15.3359	0.0837386	1	-0.788114	0.554652	0.942171	-2.48877	0.000159325
circ_000409	204.295	57.955	55.365	6.565	235.135	17.37	224.9	71.665	190.925	47.97	282.935	38.005	360.18	30.535	-1.81765	0.00648957	0.0513135	-3.07611	0.00365479	0.0180739	-1.64994	0.013779	0.0871406	-2.89621	1.02419e-06	1.79943e-05	2.08644	0.00501431	0.0346532	-0.236278	0.892698	1	0.348247	0.48817	1	1.40373	0.58204	1	-0.579136	0.488406	1	-0.315725	0.863197	1	-3.75882	4.43822e-06	8.65076e-05	-1.9928	0.000110664
circ_000415	102.895	2.695	104.155	0.001	101.915	0.001	71.725	0.001	53.405	0.001	24.35	0.001	32.755	0.001	-5.25474	0.000349082	0.00388312	-16.6684	6.73225e-08	8.66216e-07	-16.1302	0.000883948	0.0080748	-14.5716	0.11412	0.430681	-0.0313657	0.626541	0.902315	-0.425501	0.917918	1	0.427793	0.818068	1	0	1	1	0	1	1	0	1	1	-16.637	3.15095e-05	0.000549029	-15.7047	0.00224984
circ_000423	767.35	559.465	662.275	691.94	369.115	252.63	786.61	442.145	140.65	229.19	909.695	522.78	368.98	276.815	-0.455837	0.268326	0.656527	0.0632165	0.223551	0.470676	-0.831129	0.071695	0.294718	-0.799179	0.0135296	0.0835179	-0.84336	0.0026935	0.0205036	-2.48354	2.06944e-09	5.78924e-07	-1.30184	0.000340626	0.0221407	-1.45362	0.000514953	0.0438898	-0.947975	0.00938761	0.28518	-0.917282	0.00569551	0.272889	-0.547044	0.311378	0.781845	0.704435	0.144523
circ_000435	100.735	131.91	251.65	199.595	63.525	112.765	148.145	113.04	94.045	166.72	130.755	252.47	117.005	341.54	0.388989	0.433994	0.811048	-0.334343	0.0748561	0.216708	-0.390177	0.731289	0.980717	0.949246	0.0498182	0.233165	-1.98602	0.000181271	0.0022048	-0.655587	0.577451	1	-0.160296	0.856205	1	-0.823756	0.202068	1	0.560594	0.379302	1	0.435943	0.453936	1	0.827923	0.222241	0.670806	0.826004	0.207531
circ_000452	207.7	422.32	195.83	392.56	256.975	490.755	252.54	512.035	190.29	560.035	233.92	485.29	227.31	596.84	1.02384	0.0072745	0.0551728	1.00331	0.213058	0.45643	1.01973	0.00427956	0.0330589	1.05283	0.00223288	0.018751	0.392026	0.855491	1	-0.408312	0.721604	1	-0.0413541	0.97412	1	0.32209	0.338118	1	0.129275	0.840104	1	0.298497	0.518777	1	0.933375	0.0234809	0.163654	1.55732	3.46819e-05
circ_000454	273.08	343.37	60.275	653.92	235.195	317.005	342.58	511.92	268.645	483.445	429.195	834.51	268.72	642.45	0.33044	0.343603	0.737678	3.43948	6.98961e-08	8.89447e-07	0.579477	0.0322784	0.163928	0.959296	0.0474321	0.228555	1.96423	0.0271362	0.129595	-0.35074	0.880315	1	-0.67553	0.233307	1	-1.04461	0.0363328	0.626829	-0.0825666	0.676599	1	-0.377345	0.204708	1	0.430648	0.39244	0.836338	0.847651	0.0312395
circ_000459	362.33	525.55	417.21	607.185	211.71	635.63	622.585	887.005	353.565	1054.14	730.675	1113.57	580.735	1456.33	0.536524	0.0931128	0.372451	0.541362	0.852281	0.992899	0.510671	0.0393563	0.188506	0.60789	0.0211195	0.123053	-0.978684	0.00234721	0.0181214	-0.816295	0.163299	1	-0.33135	0.349664	1	0.0660511	0.669684	1	0.249059	0.525526	1	0.387145	0.281972	1	1.5861	6.34449e-05	0.00102763	1.57603	9.39292e-06
circ_000468	69.475	35.92	185.445	56.59	51.895	43.275	93.295	70.245	37.065	26.3	97.345	64.68	88.185	63.63	-0.951707	0.337519	0.734119	-1.71237	7.38716e-05	0.000622684	-0.409404	0.818706	1	-0.589787	0.622521	0.927991	-1.83732	0.000752851	0.00721163	-1.33174	0.301172	1	-0.142574	0.874282	1	-0.387013	0.791181	1	-1.41733	0.180281	1	-0.0236126	0.910032	1	-0.262062	0.954853	1	-0.494995	0.740133
circ_000470	15159.8	17224.7	4835.65	9539.53	4950.04	8714.93	36429.2	76310.5	18228.1	41914	11546.2	33740.4	4935.68	17466.5	0.184226	0.384143	0.774229	0.980208	0.0654525	0.196357	1.06678	1.12337e-05	0.000152117	1.54705	2.48646e-06	3.9438e-05	0.0337289	0.439869	0.768402	-0.998929	0.0243144	0.41224	-1.2261	9.74259e-05	0.0089713	-0.130429	0.945943	1	-0.864449	0.000336945	0.0315605	-0.949882	0.00474951	0.251149	0.81605	0.0239384	0.165838	1.20126	0.00114499
circ_000471	309.47	437.22	118.345	401.395	455.405	505.21	120.84	193.645	150.205	194.605	264.75	216.04	253.52	220.83	0.49856	0.124478	0.435757	1.76202	0.00353587	0.0176489	0.680316	0.0777684	0.310804	-0.293332	0.617831	0.923512	1.94415	0.00107247	0.00952455	0.313835	0.255186	1	-0.0625311	0.926317	1	0.331861	0.282744	1	0.00713453	0.970845	1	0.0316377	0.945658	1	0.149733	0.507264	0.908127	0.373616	0.546761
circ_000476	73.1	95.885	292.725	77.725	96.93	79.905	96.255	84.03	113.885	198.76	25.175	109.26	135.78	127.165	0.391434	0.554399	0.890657	-1.9131	2.46591e-06	2.44062e-05	-0.195957	0.9548	1	2.1177	0.0347234	0.182738	-1.59453	0.000455008	0.00467113	0.242644	0.502312	1	2.43121	0.0138628	0.259634	0.0399071	0.923354	1	1.24205	0.0229849	0.516701	0.218936	0.85027	1	-0.278657	0.812073	1	0.80345	0.138456
circ_000477	264.94	418.98	218.89	602.44	226.18	513.69	503.23	588.31	373.185	700.215	580.425	842.18	471.75	859.555	0.661216	0.0558347	0.26086	1.46061	0.0103454	0.0446943	0.225359	0.232796	0.60078	0.537019	0.0919381	0.372317	0.0472653	0.542999	0.853461	-0.431327	0.694775	1	-0.299087	0.466204	1	-0.22992	0.753658	1	0.251221	0.517665	1	0.0294613	0.943134	1	1.18343	0.00209589	0.0227385	0.907907	0.0159446
circ_000479	16296.9	12259.4	24826	12025	10785.5	10772.3	20774.8	13958.5	13651.3	11682.6	14916.6	11647	15394.1	10011.4	-0.410708	0.284107	0.677218	-1.04581	1.25795e-07	1.5174e-06	-0.573695	0.101708	0.377631	-0.356964	0.283863	0.714035	-1.20275	1.81977e-06	3.51091e-05	-0.605799	0.248278	1	0.0454606	0.862565	1	-0.158713	0.810473	1	-0.256787	0.220798	1	-0.218311	0.272491	1	-0.00176741	0.776114	0.997242	-0.224683	0.294419
circ_000490	195.61	105.245	163.215	160.745	268.43	192.605	252.61	83.49	235.09	109.475	206.37	106.34	382.345	70.77	-0.894228	0.237423	0.625625	-0.0219998	0.430481	0.685544	-1.59724	0.0072897	0.0525097	-0.956549	0.1474	0.505497	0.717772	0.507148	0.817721	-0.103699	0.80533	1	0.889642	0.106884	0.82592	0.260871	0.611224	1	0.390926	0.617115	1	-0.587475	0.439338	1	-0.478901	0.524344	0.908127	-1.10261	0.00691336
circ_000492	79.305	109.24	507.935	52.78	119.065	98.595	78.65	127.83	158.28	73.02	110.375	136.91	65.615	138.645	0.462017	0.438822	0.817456	-3.26658	7.85002e-18	3.36679e-16	0.700708	0.24069	0.617003	0.310814	0.569623	0.896018	-2.09289	3.16857e-08	1.01304e-06	1.00896	0.0635841	0.697555	-0.750316	0.438444	1	0.901523	0.208224	1	-0.807863	0.147452	0.994335	0.0181678	0.931219	1	-0.272163	0.845756	1	-1.11612	0.0290097
circ_000494	9.845	0.001	44.845	0.001	0.001	65.72	0.001	0.001	16.625	0.001	0.001	24.06	0.001	0.001	-13.2652	0.353033	0.742872	-15.4527	0.00154595	0.00860678	0	1	1	14.5543	0.2069	0.60396	-15.4527	0.00339761	0.0246878	14.0211	0.238463	1	0	1	1	16.004	0.00535463	0.219738	0	1	1	-14.5543	0.242017	1	16.004	0.00560361	0.0515532	-14.0211	0.226205
circ_000495	239.21	39.815	250.545	105.245	326.21	88.175	328.995	131.805	364.955	55.115	433.105	148.705	566.46	85.94	-2.58689	0.00391273	0.0326434	-1.25132	0.0319557	0.113164	-1.31966	0.00832914	0.0595456	-1.54226	0.000679224	0.00674498	0.380731	0.948954	1	0.149653	0.217926	1	0.387257	0.316165	1	-0.25531	0.964864	1	-1.25789	0.0512001	0.777688	-0.791051	0.485968	1	-1.88736	0.121709	0.480979	-2.7272	4.93644e-09
circ_000496	70.905	45.265	698.515	35.695	61.56	33.63	58.565	57.46	51.94	49.095	73.735	26.63	24.435	1.875	-0.647491	0.561344	0.890657	-4.2905	7.79056e-26	5.67359e-24	-0.0274807	0.870723	1	-1.4693	0.311611	0.749178	-3.50423	2.64909e-16	2.69485e-14	-0.173193	0.896326	1	-1.5934	0.290837	1	-0.0859732	1	1	-0.226982	0.839337	1	-3.82809	0.350856	1	-0.872244	0.484907	0.892368	-0.0812699	0.920758
circ_000498	122.2	192.345	367.805	221.275	177.05	235.24	128.4	124.65	65.52	196.425	167.35	219.31	155.455	216.56	0.654452	0.166294	0.509793	-0.733101	0.00159201	0.0088208	-0.0427623	0.925861	1	0.390103	0.343153	0.776001	-1.05478	0.0012078	0.010477	-0.970638	0.265037	1	-0.106372	0.906844	1	0.0882929	0.722924	1	0.656096	0.199487	1	-0.0182048	0.862446	1	0.409977	0.312607	0.782635	1.58397	0.00311412
circ_000500	142.11	78.265	367.025	113.165	59.295	133.68	71.235	106.505	52.375	97.57	158.85	199.12	180.37	145.605	-0.860569	0.531344	0.874876	-1.69745	1.93682e-07	2.31221e-06	0.580263	0.270759	0.652603	0.325973	0.465423	0.847708	-2.6299	6.02911e-08	1.72989e-06	-0.443708	0.961416	1	0.183294	0.793377	1	0.240356	0.657137	1	-0.126412	0.83212	1	-0.451578	0.385866	1	1.1728	0.111783	0.464079	0.897559	0.370099
circ_000505	109.485	0.001	132.14	0.001	68.9	0.001	78.16	0.001	48.86	0.001	108.245	0.001	46.915	0.001	-16.7404	3.63057e-06	5.97255e-05	-17.0117	1.73628e-09	2.75426e-08	-16.2541	0.00041142	0.0041539	-16.7239	9.67102e-05	0.00115045	-0.939491	0.0475914	0.195072	-0.677777	0.693229	1	-1.20618	0.180263	1	0	1	1	0	1	1	0	1	1	-16.0722	0.000993269	0.012121	-15.5764	0.00211558
circ_000518	31.42	6.37	6.96	0.001	29.98	9.735	20.055	3.92	100.01	2.42	24.745	0.001	92.82	0.001	-2.30232	0.228913	0.616061	-12.7649	0.350636	0.62854	-2.35504	0.4215	0.782494	-14.5948	0.0889695	0.362869	2.10684	0.357874	0.707485	2.31811	0.00335173	0.12933	1.9073	0.0781898	0.767429	13.249	0.350682	1	-0.695847	1	1	0	1	1	-1.62275	0.459273	0.867264	-5.36899	2.35227e-05
circ_000521	52.345	80.205	187.88	89.095	1.69	54.565	82	213.54	38.07	136.33	69.625	149.255	50.415	74.445	0.61564	0.477751	0.84636	-1.0764	0.00757828	0.0340141	1.38081	0.0044867	0.0339749	1.1001	0.171175	0.543005	-6.79664	1.99375e-10	8.263e-09	-1.10697	0.435978	1	-0.465752	0.733298	1	-0.707369	0.476196	1	-0.647403	0.13129	0.977282	-1.00353	0.168513	1	5.01288	0.0125341	0.0982563	1.84038	0.011164
circ_000527	83.925	43.105	18.015	66.9	21.095	42.08	28.84	38.06	0.001	23.225	84.935	9.705	147.18	5.07	-0.961245	0.422362	0.802833	1.89281	0.19798	0.436688	0.400204	0.916599	1	-3.12956	0.146116	0.505497	0.227702	0.944392	1	-14.8158	0.0990446	0.877212	0.793151	0.513888	1	-0.668872	0.565908	1	-0.712597	0.682402	1	-0.936742	0.884621	1	0.996234	0.468618	0.874624	14.5034	0.0666202
circ_000530	48.695	118.765	11.14	47.96	49.77	76	51.16	36.945	18.285	68.625	60.33	80.275	0.001	85.935	1.28626	0.0848839	0.352915	2.10608	0.20904	0.45162	-0.469637	0.798403	1	0.412075	0.709921	0.958452	2.15953	0.141565	0.404917	-1.48436	0.410418	1	-15.8806	0.00307723	0.0956543	0.664168	0.432346	1	0.893355	0.343332	1	0.0982951	0.965293	1	0.610723	0.435657	0.856935	1.90807	0.0902074
circ_000531	17.34	154.15	37.28	120.28	6.645	55.265	18.725	100.81	8.5	43.41	13.615	83.76	0.001	55.055	3.15216	0.00242417	0.021949	1.68992	0.100635	0.26129	2.4286	0.0183303	0.106556	2.62106	0.0295265	0.162112	-2.48806	0.0982082	0.327068	-1.13943	0.867076	1	-13.7329	0.323757	1	-1.12196	0.26209	1	-1.21554	0.130455	0.977282	-0.605388	0.463604	1	3.05602	0.108015	0.458367	2.35249	0.17264
circ_000547	0.001	0.001	113.125	12.53	13.79	0.001	5.28	6.405	0.001	7.92	19.46	0.001	8.335	0.001	0	1	1	-3.17446	7.73318e-05	0.000639645	0.278661	1	1	-14.2482	0.282167	0.712908	-3.03622	0.000353057	0.00383564	-12.3663	0.733831	1	-1.22326	0.680749	1	-13.6131	0.277783	1	0.306302	1	1	0	1	1	-13.7513	0.189385	0.616975	12.9513	0.458343
circ_000571	54.475	238.595	47.74	225.71	48.795	214.72	48.77	140.55	61	200.14	55.65	165.565	55.13	212.39	2.1309	0.000104925	0.00142503	2.2412	0.002143	0.01128	1.52702	0.0146948	0.0899666	1.57294	0.0271405	0.151192	0.0315348	0.879922	1	0.322815	0.579769	1	-0.0135441	1	1	-0.0720138	1	1	0.509926	0.38033	1	0.359318	0.584545	1	2.13765	0.00154981	0.0178228	1.71413	0.0171198
circ_000587	22.595	33.685	0.001	30.785	0.001	53.06	0.001	0.001	0.001	0.001	35.585	68.56	0.001	0.001	0.576103	0.70561	0.946985	14.9099	0.129513	0.318421	0	1	1	0.946098	0.466927	0.847744	0	1	1	0	1	1	-15.119	0.036932	0.492698	0.785397	0.522704	1	0	1	1	-16.0651	0.0204627	0.584639	15.6953	0.00515294	0.0489742	0	1
circ_000603	601.15	2.925	493.15	4.63	476.54	1.94	628.17	7.97	359.795	1.77	618.79	0.001	470.65	2.5	-7.68314	9.21454e-23	6.72661e-21	-6.73487	3.17364e-26	2.62505e-24	-6.30043	2.31898e-22	1.48286e-20	-19.2391	2.69829e-26	1.62182e-24	-0.0494292	0.340086	0.686924	-0.80398	0.133216	0.964957	-0.394795	0.3245	1	-1.25496	1	1	-2.17083	0.681945	1	11.2877	1	1	-7.9404	3.00128e-18	2.46534e-16	-7.66728	2.89945e-22
circ_000633	196.315	605.145	112.745	254.25	34.455	113.09	306.99	609.49	151.61	453.075	68.695	262.85	75.795	74.74	1.62411	6.21068e-06	9.80281e-05	1.17318	0.149007	0.352863	0.989411	0.00142375	0.0120495	1.93596	0.000331855	0.00347686	-1.71028	0.0100493	0.0611152	-1.01783	0.104192	0.877212	0.141898	0.913351	1	-1.16878	0.0470058	0.732897	-0.427853	0.197426	1	-1.81429	0.00179576	0.151771	1.71469	0.0285372	0.188922	1.57938	0.00164289
circ_000634	50.095	20.92	61.445	0.001	96.875	90.725	29.735	24.4	45.845	12.32	112.33	56.89	66.44	37.12	-1.25978	0.448471	0.827511	-15.907	7.42059e-05	0.000622684	-0.285281	0.899697	1	-0.981496	0.537214	0.896018	0.656829	0.64525	0.913054	0.624602	0.764444	1	-0.757619	0.602262	1	16.4692	0.000131123	0.012107	-0.985879	0.600338	1	-0.615978	0.669348	1	-0.0946243	0.974465	1	-1.89576	0.297718
circ_000637	4120.45	1846.35	5096.03	2722.8	6843.53	3735.09	6308.13	4482.84	7036.82	5723.35	8718.14	5855.27	11880.9	5209.53	-1.15813	0.014007	0.0929553	-0.904283	9.73389e-07	1.03411e-05	-0.492799	0.208634	0.557685	-0.574283	0.0420164	0.211378	0.425367	0.750621	0.965454	0.157712	0.128418	0.953682	0.446551	0.0955706	0.780202	0.456054	0.0593888	0.822535	0.352448	0.26587	1	-0.168584	0.393272	1	-0.873596	0.0329401	0.208994	-0.298064	0.216918
circ_000643	2418.76	5860.25	2062.71	6296.93	3910.26	7912.36	2802.09	7451.34	3069.07	7056.98	4492.73	8756.31	5936.2	5454.85	1.2767	6.09331e-05	0.000867925	1.61011	0.00064424	0.00403259	1.411	2.20935e-07	4.16879e-06	0.962729	7.30773e-05	0.000907112	0.922724	0.0506349	0.203974	0.131298	0.150558	1	0.401947	0.220412	1	0.32946	0.220056	1	-0.078449	0.626869	1	-0.682785	0.00681307	0.302529	1.01684	0.00144735	0.0168126	1.20125	0.00124484
circ_000646	155.96	160.74	87.515	115.845	295.12	180.04	239.885	159.535	229.01	195.71	250.535	222.73	281.55	234.195	0.0435529	0.838406	1	0.404594	0.962524	1	-0.58847	0.352899	0.733403	-0.169716	0.862208	1	1.7537	0.00501682	0.0346532	-0.0669324	0.675786	1	0.168379	0.732918	1	0.636122	0.364524	1	0.294845	0.737248	1	0.0724144	1	1	-0.712984	0.305711	0.779529	-0.226693	0.536712
circ_000647	17.77	1.79	30.24	12.835	73.34	16.165	12.54	17.87	95.14	24.645	14.92	22.95	200.28	26.175	-3.31141	0.387114	0.774229	-1.23637	0.329426	0.600172	0.511002	0.791154	1	0.621247	0.810294	1	1.27814	0.33756	0.683498	2.92351	0.00231243	0.103504	3.7467	4.5227e-05	0.00454326	0.33279	0.91815	1	0.463755	0.804332	1	0.189695	1	1	-2.18173	0.102689	0.444617	-1.94876	0.0977014
circ_000655	89.665	161.57	525.49	144.84	85.505	78.035	149.155	108.695	98.965	151.13	152.765	134.555	179.41	180.285	0.849542	0.117733	0.425733	-1.8592	1.11595e-08	1.63578e-07	-0.456527	0.572113	0.905417	-0.183118	0.855389	1	-2.61958	8.48797e-10	3.39216e-08	-0.591822	0.548116	1	0.231946	0.72905	1	-0.892267	0.221482	1	0.475504	0.478423	1	0.422083	0.598064	1	-0.131887	1	1	0.6108	0.343089
circ_000666	0.001	1224.41	34.45	889.335	146.47	1000.95	85.69	984.18	79.23	897.975	14.545	1879.23	9.36	1135.54	20.2237	8.53269e-15	3.55935e-13	4.69015	1.0473e-17	4.33135e-16	3.52172	6.78901e-07	1.13249e-05	7.01348	2.14738e-41	4.90461e-39	2.08803	0.0711491	0.261894	-0.11308	1	1	-0.635943	0.920081	1	0.170571	0.566073	1	-0.132247	0.629361	1	-0.726773	0.0610679	0.998952	2.77269	0.00032498	0.00450274	3.50256	1.0989e-11
circ_000667	31.285	4.79	24.625	0.001	27.955	20.575	0.001	3.6	210.34	6.075	58.505	3.25	149.63	10.52	-2.70737	0.170292	0.517973	-14.5878	0.0339144	0.118087	11.8138	0.713333	0.980717	-4.17005	0.0187149	0.111897	0.182983	0.941434	1	17.6824	5.29522e-12	5.92535e-09	1.35477	0.0857385	0.767429	14.3286	0.139616	1	0.754888	1	1	1.69462	0.733282	1	-0.442214	0.888804	1	-5.1137	3.03777e-09
circ_000675	259.325	79.58	537.785	84.905	175.95	72.195	189.255	71.645	213.255	37.01	269.405	69.96	252.19	22.14	-1.70428	0.00718467	0.0548477	-2.66311	2.12942e-14	5.73458e-13	-1.40139	0.03947	0.188506	-1.94517	0.00041977	0.00421315	-1.61186	2.7182e-06	5.06945e-05	0.172248	0.290451	1	-0.0952656	0.876248	1	-0.233951	0.924861	1	-0.952951	0.25679	1	-1.65988	0.180055	1	-1.28519	0.0762876	0.374157	-2.52659	7.22702e-06
circ_000691	494870	201793	512444	212894	471500	183062	385648	192980	458547	154941	377606	150077	328713	180166	-1.29417	0.000111993	0.00150354	-1.26726	1.98297e-10	3.58793e-09	-0.998833	0.00638516	0.047111	-1.33118	0.000153934	0.00170672	-0.120137	0.18642	0.484553	0.249782	0.163936	1	-0.200052	0.430556	1	-0.217808	0.679609	1	-0.316731	0.243561	1	0.263626	0.610776	1	-1.36493	0.000712757	0.00900737	-1.56535	7.90117e-06
circ_000700	4.365	0.001	66.135	0.001	0.001	54.38	4.375	6.62	29.405	5.48	18.2	7.28	41.665	0.001	-12.0918	0.570351	0.890657	-16.0131	0.000154157	0.00114432	0.597548	1	1	-1.32193	0.671005	0.955308	-16.0131	0.000272955	0.00314883	2.74871	0.172369	1	1.1949	0.418602	1	15.7308	0.0222472	0.51354	-0.272655	1	1	-12.8297	0.6049	1	15.7308	0.0298238	0.194871	-2.42381	0.209135
circ_000731	9.715	77.465	3.365	106.8	0.001	52.205	0.001	50.4	5.245	100.275	5.34	87.095	17.06	110.59	2.99526	0.0251818	0.147062	4.98816	0.000147534	0.00110938	15.6211	0.00411895	0.0320332	4.02768	0.00396851	0.0302136	-11.7164	0.709235	0.936251	12.3567	0.590154	1	1.67571	0.510193	1	-1.03265	0.254846	1	0.992466	0.229161	1	0.344559	0.736769	1	15.6719	0.00664613	0.0597113	4.25688	0.000763896
circ_000751	177.81	225.11	329.02	221.6	148.47	255.27	210.59	196.255	148.19	187.1	246.62	210.44	192.06	261.785	0.340294	0.386755	0.774229	-0.570217	0.0112809	0.0480266	-0.101708	0.841653	1	-0.228881	0.706142	0.958452	-1.148	0.00111258	0.00980296	-0.506989	0.723018	1	-0.360733	0.48345	1	0.204066	0.574856	1	-0.0689199	0.788938	1	0.314973	0.595758	1	0.781853	0.0992889	0.435141	0.336361	0.676511
circ_000756	174.405	1.56	186.335	0.001	128.95	0.001	205.72	0.001	178.91	0.001	300.775	0.001	188.22	0.001	-6.80475	3.5331e-08	8.42177e-07	-17.5075	1.95468e-10	3.58793e-09	-17.6503	2.20036e-10	5.88979e-09	-18.1983	1.35932e-13	4.31205e-12	-0.531087	0.194321	0.498727	-0.201448	0.871043	1	-0.676265	0.169608	1	0	1	1	0	1	1	0	1	1	-16.9765	2.25145e-06	4.79476e-05	-17.4489	5.66231e-10
circ_000760	17.03	18.675	14.375	73.875	110.43	106.51	65.91	68.61	30.505	72.65	71.275	25.64	0.001	19.04	0.13303	0.955931	1	2.36152	0.264914	0.525895	0.0579215	0.808754	1	-1.475	0.316535	0.754661	2.9415	0.00555904	0.0372489	-1.11145	0.751184	1	-16.1211	0.00140807	0.056003	0.527831	0.638786	1	0.0825439	0.97289	1	-0.429363	0.946998	1	-0.0521433	1	1	1.25192	0.503667
circ_000773	82.41	92.97	284.5	124.245	52.905	12.81	162.71	59.905	72.46	48.27	150.35	69.21	76.805	76.315	0.173946	0.738532	0.964662	-1.19524	0.000185312	0.00134119	-1.44155	0.044886	0.210016	-1.11927	0.199796	0.593746	-2.42695	3.0285e-06	5.55556e-05	-1.16705	0.260833	1	-0.969053	0.18209	1	-3.27785	0.00606625	0.24005	-0.31155	0.671938	1	0.140986	1	1	-2.04613	0.300609	0.779529	-0.586058	0.473212
circ_000778	125.73	43.98	114.875	28.715	150.18	21.145	138.135	37.52	100.935	20.26	267.985	53.725	133.585	20.215	-1.51541	0.0952158	0.377321	-2.00019	0.00119947	0.0068999	-1.88035	0.026737	0.143805	-2.31849	0.000793585	0.00768029	0.386628	0.950533	1	-0.452652	0.775261	1	-1.00439	0.0800651	0.767429	-0.441488	0.77752	1	-0.889026	0.51117	1	-1.41017	0.306187	1	-2.8283	0.00192754	0.0211111	-2.31672	0.00672537
circ_000788	13.085	36.865	0.001	46.04	112.045	56.69	26.75	37.405	59.795	50.775	11.415	23.095	10.15	34.105	1.49434	0.249265	0.631544	15.4906	0.00665807	0.0305825	0.483692	0.706706	0.980717	1.01665	0.689746	0.955308	16.7737	4.28921e-06	7.49942e-05	1.16049	0.205284	1	-0.169451	1	1	0.300206	0.725991	1	0.440887	0.709453	1	0.562403	0.770043	1	-0.982912	0.317552	0.785323	-0.235907	0.798816
circ_000793	0.001	51.91	0.06	32.72	126.27	62.74	82.88	28.055	42.845	47.335	114.84	49.145	46.615	73.045	15.6637	0.00134225	0.0131318	9.09099	0.0985139	0.258097	-1.56277	0.163339	0.498921	-1.22451	0.179853	0.558131	11.0393	1.09596e-06	2.22979e-05	-0.951897	0.651112	1	-1.30076	0.291907	1	0.939213	0.458689	1	0.754649	0.522727	1	0.571741	0.584188	1	-1.00905	0.210608	0.647661	0.14378	0.937214
circ_000794	6389.14	6272.05	613.015	5863.52	8436.33	5683.8	9247.82	6145.57	6265.43	7794.8	7948.97	5478.82	9235.16	7759.91	-0.0266858	0.857384	1	3.25777	2.20472e-19	9.81947e-18	-0.589566	0.104353	0.380527	-0.536901	0.0738667	0.311276	3.78262	4.73624e-23	7.57122e-21	-0.561699	0.356712	1	0.216369	0.423603	1	-0.0449137	0.888425	1	0.342965	0.298361	1	0.502174	0.127847	1	-0.569762	0.203522	0.642625	0.315098	0.502395
circ_000795	247.045	580.51	100.345	591.77	268.595	513.285	345.21	718.845	236.525	741.485	336.59	615.385	475.855	742.425	1.23255	0.00134916	0.0131318	2.56007	6.45198e-07	6.98262e-06	1.05821	0.000959152	0.00849218	0.870497	0.0179641	0.107974	1.42046	0.0452133	0.187384	-0.545482	0.487144	1	0.49953	0.189512	1	-0.205276	0.756696	1	0.0447368	0.954412	1	0.270756	0.5083	1	0.934328	0.0120044	0.0952074	1.64842	1.10758e-05
circ_000797	185.76	0.001	142.52	0.001	150.325	0.001	186.315	0.001	102.35	1.77	182.335	0.001	227.315	0.001	-17.5031	5.87428e-10	1.96033e-08	-17.1208	2.50013e-10	4.45407e-09	-17.5074	3.61606e-09	8.00402e-08	-17.4762	1.0526e-07	2.0374e-06	0.0769206	0.692262	0.936251	-0.864233	0.285499	1	0.318101	0.596688	1	0	1	1	10.7895	1	1	0	1	1	-17.1977	1.25167e-07	3.06259e-06	-5.85362	1.93778e-05
circ_000799	1959.71	2781.55	1135.77	3409.28	1491.42	2329.82	2108.41	3634.23	1397.46	3194.43	2367.18	3440.11	1515.93	2817.98	0.505248	0.071948	0.312399	1.5858	0.000698972	0.00430537	0.785491	0.00107521	0.00930505	0.539282	0.0256928	0.145253	0.393021	0.786443	0.978667	-0.593352	0.30274	1	-0.642965	0.0456192	0.536268	-0.549248	0.114273	0.996967	-0.186089	0.396973	1	-0.287793	0.202893	1	0.64353	0.0309432	0.198797	1.19275	0.000536626
circ_000804	10.335	0.001	0.001	17.97	12.02	12.52	64.705	6.205	16.81	0.001	0.001	0.001	57.975	0.001	-13.3353	0.315457	0.715467	14.1333	0.25533	0.520211	-3.38237	0.200949	0.553079	0	1	1	13.5531	0.326963	0.673812	-1.94456	0.491504	1	15.8231	0.00340226	0.101608	-0.521356	0.846417	1	-12.5992	0.555422	1	0	1	1	0.0587977	1	1	-14.037	0.211329
circ_000821	114.635	1.56	0.001	47.665	541.385	68.66	121.89	18.54	594.305	30.74	305.365	52.675	828.1	216.56	-6.19936	1.34857e-05	0.000204562	15.5406	0.00824426	0.036578	-2.71687	0.0185208	0.107123	-2.53534	1.32517e-05	0.000186832	19.0463	6.06962e-20	8.48988e-18	2.28562	1.95919e-11	1.09616e-08	1.43927	0.00053526	0.0295781	0.52654	0.53978	1	0.729476	0.662699	1	2.03958	0.00192813	0.151771	-2.97911	3.76048e-07	8.64911e-06	-4.27301	1.24988e-19
circ_000832	275.825	362.145	53.68	308.01	246.615	264.305	401.78	259.02	227.27	241.85	521.795	347.245	334.045	183.51	0.392814	0.232478	0.619335	2.52052	8.43793e-05	0.00067855	-0.633342	0.190918	0.547659	-0.587529	0.160151	0.52859	2.1998	0.00231114	0.018085	-0.821998	0.168925	1	-0.643441	0.11097	0.83722	-0.220773	0.760146	1	-0.098951	0.666503	1	-0.920095	0.0259136	0.696506	0.0999432	0.679976	0.990988	0.0897053	1
circ_000837	117.55	30.655	0.001	6.215	136.63	155.72	174.775	87.975	139.795	59.45	83.835	72.23	99.085	83.275	-1.93908	0.158221	0.499926	12.6015	0.592442	0.830318	-0.990333	0.149017	0.479102	-0.214955	0.852739	1	17.0599	3.29062e-07	7.22002e-06	-0.322186	0.97492	1	0.241114	0.871309	1	4.64706	6.89158e-06	0.000954484	-0.565417	0.483761	1	0.205285	0.855364	1	0.18868	0.603964	0.953722	-1.23356	0.0620182
circ_000844	14.38	418.65	1.785	383.42	0.001	413.37	18.285	523.06	4.785	429.46	0.001	347.035	3.345	475.36	4.86361	1.23884e-16	6.29114e-15	7.74686	6.72201e-17	2.511e-15	4.83824	1.19282e-15	4.42884e-14	18.4047	8.92735e-17	3.39835e-15	-10.8017	1	1	-1.93407	0.491912	1	11.7078	1	1	0.108508	0.614395	1	-0.284453	0.359582	1	0.453939	0.3086	1	18.6571	1.45811e-18	1.28987e-16	6.48786	2.65838e-21
circ_000879	179.145	547.27	6.43	534.5	169.815	471.09	121.43	601.125	11.815	807.27	256.015	657.265	84.87	878.745	1.61112	0.000479686	0.00523619	6.37723	2.08923e-19	9.67732e-18	2.30754	5.15599e-10	1.29012e-08	1.36025	0.00571937	0.0410787	4.723	0.000758983	0.00721163	-3.36143	0.00658721	0.201784	-1.5929	0.177203	1	-0.182187	0.827767	1	0.425386	0.23767	1	0.418969	0.261871	1	1.47204	0.0077329	0.0668634	6.09436	2.79972e-26
circ_000911	12.5	5.665	1.75	4.635	75.945	19.1	14.565	2.665	58.965	23.695	14.69	2.48	156.725	20.47	-1.14178	0.712444	0.946985	1.40521	1	1	-2.4503	0.412307	0.77607	-2.56642	0.414345	0.837491	5.43953	0.000852665	0.00775717	2.01735	0.0632725	0.697555	3.41533	0.00106461	0.051097	2.04293	0.349894	1	3.15238	0.136692	0.980928	3.0451	0.31841	1	-1.99138	0.0818485	0.387241	-1.31528	0.185493
circ_000919	8.105	0.001	0.001	0.001	49.38	0.001	0.001	5.53	31.075	5.57	19.195	0.001	22.495	0.001	-12.9846	0.398443	0.78347	0	1	1	12.4331	0.72237	0.980717	-14.2284	0.13788	0.487427	15.5916	0.00600792	0.0395871	14.9235	0.0241147	0.41224	0.228874	1	1	0	1	1	0.0103978	1	1	0	1	1	-15.5916	0.0107889	0.0879949	-2.48001	0.156558
circ_000920	146.79	132.47	475.76	120.885	185.645	193.47	155.445	148.545	198.045	157.61	167.01	166.63	354.515	308.79	-0.148088	0.926274	1	-1.9766	1.33848e-09	2.15272e-08	-0.0655042	0.964762	1	-0.00328632	0.879054	1	-1.35769	3.93449e-05	0.000557304	0.349424	0.298067	1	1.08591	0.024172	0.392795	0.678475	0.176189	1	0.085459	1	1	0.889978	0.105949	1	0.0595634	0.739279	0.990988	-0.329469	0.422853
circ_000933	49.185	53.47	1.745	33.21	56.69	90.635	71.245	40.395	33.32	33.03	62.935	55.145	22.82	116.31	0.120511	0.843623	1	4.25032	0.066537	0.198582	-0.818612	0.501282	0.848493	-0.190632	0.948277	1	5.0218	0.00636202	0.0415599	-1.0964	0.407196	1	-1.46356	0.242883	1	1.44845	0.0912643	0.941221	-0.2904	0.800315	1	1.07667	0.25677	1	0.676974	0.346688	0.805437	-0.0126114	1
circ_000937	72.91	72.43	273	169.415	79.92	126.245	157.915	124.505	101.695	137.075	124.88	184.945	123.165	179.985	-0.00952933	0.969709	1	-0.688339	0.0173585	0.0688397	-0.342945	0.938731	1	0.566554	0.298032	0.729501	-1.77227	0.000766048	0.00721163	-0.634899	0.77489	1	-0.0199501	1	1	-0.424335	0.603149	1	0.138762	0.888266	1	-0.0392196	0.89497	1	0.659598	0.294905	0.774293	0.430717	0.569037
circ_000946	83.765	2.215	281.2	39.98	114.36	21.73	76.085	24.115	19.835	0.001	231.67	39.64	237.075	62.14	-5.24097	0.0131675	0.0888996	-2.81425	0.00016578	0.00122276	-1.65768	0.214216	0.566811	-2.54704	0.0198814	0.118253	-1.29801	0.00234817	0.0181214	-1.93956	0.258454	1	0.0332723	0.980391	1	-0.87959	0.774783	1	-14.5576	0.145651	0.994335	0.648565	0.720598	1	-2.39582	0.0672672	0.342289	-14.2758	0.146433
circ_000955	7.31	45.375	11.15	0.001	31.33	0.001	37.845	0.001	3.29	26.365	82.34	58.385	0.001	85.66	2.63395	0.0718126	0.312399	-13.4448	0.328018	0.599969	-15.2078	0.109837	0.393953	-0.495996	0.695395	0.955308	1.4905	0.677753	0.930782	-3.52394	0.279508	1	-16.3293	0.0011098	0.051097	0	1	1	14.6863	0.113498	0.934422	0.553024	0.653459	1	-14.9353	0.137509	0.516721	3.00246	0.289676
circ_000959	1124.78	262.04	1332.15	269.315	1311.37	278.455	1271.31	286.43	1001.52	465.52	4373.62	272.72	2006.52	483.14	-2.10178	2.66474e-07	5.56903e-06	-2.30639	3.12812e-13	7.24473e-12	-2.15006	1.98636e-09	4.57261e-08	-4.00334	8.61902e-37	1.09366e-34	-0.0226872	0.347924	0.697718	-0.344112	0.806484	1	-1.12414	0.0036072	0.104894	0.0481496	0.812325	1	0.700661	0.0560015	0.796781	0.825021	0.0358856	0.823874	-2.23555	2.66044e-07	6.24389e-06	-1.10528	0.00118406
circ_000962	635.21	10.145	295.475	17.95	447.51	20.595	1342.87	34.465	486.2	14.55	1020.69	42.545	701.12	46.375	-5.96839	1.17675e-24	1.14537e-22	-4.04098	2.31783e-13	5.47765e-12	-5.28404	1.59416e-27	1.41145e-25	-4.58441	8.00408e-25	3.9742e-23	0.598884	0.532057	0.842367	-1.4657	0.000414117	0.0243893	-0.541811	0.121754	0.896922	0.19831	0.845467	1	-1.24411	0.336714	1	0.124358	1	1	-4.44155	2.33258e-09	7.24992e-08	-5.06246	6.87739e-21
circ_000963	712.53	798.325	520.7	1053.28	1434.38	894.7	723.135	490.205	995.375	503.445	1604.12	1418.94	2117.14	1763	0.164025	0.533545	0.874876	1.01636	0.103158	0.266645	-0.56088	0.320313	0.702249	-0.176963	0.646276	0.938992	1.46191	0.00117375	0.0102612	0.460975	0.0375527	0.544814	0.400338	0.235537	1	-0.235413	0.686985	1	0.038449	0.983908	1	0.313214	0.385136	1	-0.680956	0.12943	0.501161	-0.983406	0.00306788
circ_000969	369.82	16.79	585.19	29.485	334.4	110.33	429.435	43.21	281.665	208.9	521.03	67.87	425.415	147.8	-4.46115	1.20641e-10	4.26997e-09	-4.31085	1.35111e-23	9.20343e-22	-3.313	6.39302e-09	1.38837e-07	-2.94052	1.62835e-09	4.22632e-08	-0.80733	0.00601413	0.0395871	-0.608459	0.390704	1	-0.292496	0.457575	1	1.90377	0.0182635	0.481807	2.27338	0.00425385	0.183897	1.1228	0.119059	1	-1.59975	0.00396291	0.0392875	-0.431168	0.306306
circ_000986	91.985	63.07	39.025	95.565	23.31	61.45	60.725	93.305	39.7	110.255	52.405	92.74	31.415	144.615	-0.544445	0.594771	0.906529	1.29208	0.305665	0.572594	0.619664	0.303334	0.680579	0.823487	0.329052	0.761586	-0.74345	0.419833	0.752699	-0.613152	0.749289	1	-0.738251	0.572122	1	-0.637069	0.531031	1	0.240818	0.766426	1	0.640954	0.401005	1	1.39846	0.205816	0.642625	1.47363	0.127651
circ_000988	178.505	215.98	43.97	117.55	272.56	115.09	227.175	135.12	123.46	150.26	194.415	198.295	283.93	85.555	0.274933	0.64122	0.913813	1.41868	0.474677	0.729013	-0.749563	0.339767	0.723862	0.0285088	0.874501	1	2.63198	0.000223744	0.00260802	-0.87976	0.291181	1	0.546396	0.260266	1	-0.0305121	0.982752	1	0.15322	0.940828	1	-1.21272	0.0295336	0.723246	-1.24381	0.0387802	0.230985	0.283417	0.783545
circ_000990	73.475	0.001	39.625	0.001	38.865	0.001	54.26	0.001	60.94	0.001	95.705	0.001	48.305	0.001	-16.165	0.000121085	0.00158907	-15.2741	0.00235268	0.0121625	-15.7276	0.00398985	0.0312402	-16.5463	0.000768836	0.00750437	-0.0279394	0.757059	0.969943	0.1675	0.703668	1	-0.986422	0.348888	1	0	1	1	0	1	1	0	1	1	-15.2462	0.0262937	0.176171	-15.8951	0.000415024
circ_000992	157.765	46.43	71.705	89.57	215.145	144.84	249.62	98.12	278.21	97.535	197.55	155.165	379.6	152.78	-1.76465	0.0160599	0.103635	0.320942	0.835439	0.982171	-1.34711	0.0143972	0.0895739	-0.348415	0.587793	0.9108	1.58516	0.0689098	0.255331	0.156441	0.377274	1	0.942262	0.0369184	0.492698	0.693373	0.243025	1	-0.00862722	1	1	-0.0223475	0.929921	1	-0.570849	0.449609	0.856935	-1.51218	0.00549162
circ_000997	22055	11495.6	14433.4	16111.9	34408.1	27073.4	32980.4	23867.1	40740	35992.5	36853.4	30436.2	50689.3	31287.9	-0.940015	0.033234	0.183968	0.158715	0.257066	0.521336	-0.466582	0.233362	0.600894	-0.276008	0.341833	0.775991	1.25333	0.00172872	0.01412	0.304839	0.0374501	0.544814	0.459884	0.0762439	0.765905	0.748746	0.00251332	0.153337	0.592669	0.0365645	0.615889	0.0398177	0.960698	1	-0.345873	0.500381	0.906201	-0.178753	0.398456
circ_001007	84.305	29.155	60.035	17.975	62.505	9.45	73.34	34.5	82.685	7.295	129.165	41.215	63.265	25.74	-1.53187	0.176618	0.529093	-1.73981	0.0270635	0.0979361	-1.088	0.318018	0.702249	-1.64797	0.063288	0.283431	0.0581678	0.770356	0.976446	0.173025	0.638143	1	-1.02974	0.224989	1	-0.927606	0.710481	1	-2.24162	0.146186	0.994335	-0.679157	0.611536	1	-2.72559	0.0721981	0.362567	-3.50265	0.00176125
circ_001010	1010.18	591.38	417.505	855.67	732.895	715.315	729.875	628.14	653.93	317.42	790.415	711.665	1031.75	454.625	-0.772462	0.0389049	0.203771	1.03526	0.112854	0.285076	-0.216563	0.882943	1	-0.151412	0.747967	0.978441	0.811813	0.206556	0.514779	-0.158513	0.689519	1	0.384411	0.266441	1	-0.258476	0.617286	1	-0.984693	0.00335322	0.18003	-0.646521	0.0318921	0.747768	-0.0350278	0.855607	1	-1.04274	0.00263834
circ_001014	830.05	36.465	554.445	8.69	540.905	26.9	1600.12	10.62	1482.3	45.295	1062.2	12.07	950.815	48.56	-4.50861	3.6056e-18	1.91424e-16	-5.99554	2.5224e-28	2.43411e-26	-7.23525	2.91722e-41	6.71545e-39	-6.45949	3.39142e-35	3.873e-33	-0.0356691	0.326307	0.673812	-0.110338	0.569296	1	-0.159819	0.630313	1	1.63018	0.373957	1	2.09257	0.134338	0.980928	2.00834	0.205505	1	-4.3297	5.16381e-12	2.1994e-10	-5.03234	4.11702e-29
circ_001018	246.67	131.91	861.065	161.04	246.52	106.31	325.355	143.305	195.065	132.18	269.84	137.29	319.505	186.44	-0.903028	0.124609	0.435757	-2.4187	9.65259e-15	2.72627e-13	-1.18293	0.0454891	0.210892	-0.974878	0.0718804	0.306296	-1.80442	1.30551e-08	4.71247e-07	-0.73806	0.297531	1	0.243734	0.588412	1	-0.599142	0.403513	1	-0.116585	0.734979	1	0.441485	0.542073	1	-1.21343	0.055866	0.298818	-0.561451	0.189011
circ_001020	0.001	33.69	39.125	9.35	0.001	8.675	12.55	16.135	30.105	27.33	0.001	99.23	0.001	30.795	15.04	0.0647128	0.288858	-2.06505	0.0745386	0.21633	0.362506	1	1	16.5985	0.000144235	0.00162592	-15.2558	0.00551088	0.0371486	1.26232	0.600776	1	0	1	1	-0.108103	1	1	0.760292	0.779713	1	-1.68808	0.160209	1	13.0826	0.438237	0.856935	-0.139518	1
circ_001024	929.665	715.815	258.59	852.495	1354.14	1320.66	810.575	797.14	1005.25	868.395	707.99	856.825	1182.63	446.645	-0.377124	0.386685	0.774229	1.72102	0.00383263	0.0185698	-0.0241126	0.632465	0.938102	0.275272	0.247496	0.674561	2.38864	6.64956e-08	1.86021e-06	0.31053	0.083066	0.808268	0.740198	0.0732021	0.742095	0.631501	0.0758962	0.904225	0.123518	0.803246	1	-0.939872	0.00371476	0.240574	-0.0361177	0.867059	1	-0.211124	0.42539
circ_001045	1591.63	6086.7	679.745	7606.73	234.2	3094.79	1890.63	8054.14	428.125	1925.97	959.53	5041.27	300.96	3076.84	1.93516	3.8446e-09	1.05281e-07	3.48421	3.06237e-14	8.05961e-13	2.09086	3.71001e-15	1.33444e-13	2.39339	7.06065e-16	2.51977e-14	-1.53725	3.78129e-05	0.000542469	-2.14277	7.82943e-05	0.00796466	-1.67276	0.000154561	0.0120477	-1.29743	0.00108291	0.0799911	-2.06414	1.96578e-14	2.20954e-11	-0.712337	0.0115533	0.418355	3.72403	4.65796e-18	3.5711e-16	2.16948	2.74536e-05
circ_001055	504.3	1182.48	756.18	1313.79	650.09	1305.02	689.97	1151.15	572.105	1642.52	763.835	1303.52	762.16	1493.4	1.22947	0.000177745	0.00214026	0.796928	0.286363	0.549932	0.73847	0.00363655	0.0288667	0.771074	0.00597706	0.0423963	-0.21809	0.186675	0.484553	-0.270254	0.980549	1	-0.00316713	1	1	-0.00966281	0.871828	1	0.512831	0.111012	0.934422	0.196198	0.628706	1	1.00536	0.0185744	0.13781	1.52155	8.90009e-05
circ_001056	0.001	124.535	0.001	154.225	0.001	119.145	0.001	384.235	0.001	130.055	0.001	209.68	2.72	229.855	16.9262	7.21963e-07	1.40542e-05	17.2347	3.24988e-08	4.53417e-07	18.5516	4.21353e-20	2.02074e-18	17.6778	8.15541e-09	1.8627e-07	0	1	1	0	1	1	11.4094	1	1	-0.372318	0.640965	1	-1.56287	0.000143341	0.0230165	0.132535	0.857555	1	16.8624	3.82298e-06	7.58004e-05	16.9888	9.59093e-07
circ_001070	463.665	671.445	83.385	1401.11	271.055	167.91	253.215	1031.8	279.975	392.17	642.18	1676.61	171.87	151.905	0.534186	0.130745	0.45155	4.07063	3.00879e-15	9.1689e-14	2.02672	0.00093658	0.00835662	1.38449	0.00286439	0.0233652	1.70073	0.0638541	0.243866	0.144935	0.454797	1	-1.90166	1.44316e-05	0.00219459	-3.06081	1.69529e-12	6.26127e-10	-1.39561	0.011983	0.336721	-3.4643	6.80841e-11	7.50286e-08	-0.690897	0.447027	0.856935	0.486181	0.436512
circ_001071	368.87	977.71	409.81	690.455	503.49	843.68	235.83	636.565	235.39	510.21	151.16	514.1	248.105	502.73	1.40629	0.000176983	0.00214026	0.752592	0.377675	0.648883	1.43256	5.5054e-06	8.02116e-05	1.76597	4.86379e-06	7.30848e-05	0.297008	1	1	-0.00269422	0.541629	1	0.714874	0.230867	1	0.289149	0.254051	1	-0.319217	0.217949	1	-0.0322652	0.86689	1	0.744733	0.0285847	0.188922	1.11604	0.00479091
circ_001073	6.84	5.76	0.001	4.61	13.185	18.005	23.225	5.47	8.41	21.63	18.515	28.595	0.001	81.495	-0.247928	1	1	12.1706	0.723243	0.895602	-2.08607	0.362027	0.733403	0.627068	0.822867	1	13.6866	0.362573	0.707485	-1.4655	0.626826	1	-14.1764	0.291716	1	1.96556	0.53878	1	1.98342	0.407767	1	1.51095	0.358117	1	0.4495	0.838549	1	1.36286	0.548734
circ_001083	38.585	349.045	4.99	414.15	90.145	362.385	62.555	222.725	39.085	326.835	120.225	346.265	135.115	331.305	3.1773	3.25345e-09	9.26835e-08	6.37497	8.6469e-17	3.03428e-15	1.83207	0.000348137	0.00357773	1.52614	0.000953663	0.00878293	4.17514	0.00159324	0.0133047	-0.67851	0.765779	1	0.168451	0.846276	1	-0.19263	0.8155	1	0.553299	0.24135	1	-0.0637166	0.775171	1	2.0072	0.000221205	0.00326135	3.06388	6.64776e-09
circ_001087	809.73	715.375	32.005	426.66	2581.47	1427.32	502.1	719.39	1195.83	677.95	366.79	263.125	1484.38	427.79	-0.178741	0.777928	0.982194	3.73672	5.02675e-07	5.54379e-06	0.518799	0.0470454	0.214878	-0.479206	0.557554	0.896018	6.33375	4.28616e-26	9.59243e-24	1.25197	2.95427e-05	0.00367314	2.01684	1.9496e-05	0.00239368	1.74215	2.49223e-06	0.000552279	-0.0855952	0.636345	1	0.701154	0.249929	1	-0.854884	0.043989	0.253229	-0.818762	0.014929
circ_001091	31.82	128.565	98.29	0.001	68.545	128.635	0.32	156.945	33.21	151.485	0.001	228.135	63.365	247.725	2.01449	0.0481354	0.237785	-16.5848	3.51298e-05	0.000310536	8.93797	1.61161e-06	2.54104e-05	17.7995	1.75184e-10	4.76334e-09	-0.519993	0.390227	0.731431	6.6974	0.0181526	0.356363	15.9514	0.00371982	0.105395	16.9729	1.36436e-06	0.000377928	-0.0510841	0.896306	1	0.118852	0.917727	1	0.90816	0.19011	0.617588	2.18949	0.00264916
circ_001098	478.58	87.4	244.035	124.29	324.355	139.11	338.77	98.13	342.52	114.375	270.13	127.955	720.57	103.905	-2.45305	6.05336e-08	1.41406e-06	-0.973378	0.00630612	0.0290936	-1.78754	0.00049357	0.00487174	-1.07802	0.0638297	0.28474	0.410486	0.870625	1	0.0158821	0.376557	1	1.41548	0.000163544	0.0120477	0.162516	0.693315	1	0.221006	0.763392	1	-0.300371	0.59815	1	-1.22135	0.0730438	0.363638	-1.58242	0.000347344
circ_001111	0.001	125.675	8.705	94.415	0.001	81.85	0.001	87.075	12.71	192.08	23.43	140.23	8.225	127.81	16.9393	8.64791e-07	1.65586e-05	3.4391	0.00721715	0.0327743	16.41	6.04944e-05	0.000756838	2.58137	0.00383116	0.0295621	-13.0876	0.412208	0.752699	13.6337	0.333571	1	-1.51027	0.504595	1	-0.206034	0.886346	1	1.14138	0.0372602	0.615889	-0.133794	0.791244	1	16.3207	0.000129259	0.00200876	3.91767	1.04199e-05
circ_001120	818.45	855.41	848.115	1304.89	883.695	1144.28	1048.72	1328.56	647.815	1299.67	1160.68	1207.3	992.71	1425.6	0.0637218	0.662947	0.932919	0.621602	0.618096	0.839103	0.341228	0.0784639	0.312498	0.056808	0.669113	0.955308	0.0592886	0.444171	0.770585	-0.694976	0.216472	1	-0.225526	0.493959	1	-0.189494	0.738363	1	-0.0317126	0.754868	1	0.239786	0.547442	1	0.37282	0.204762	0.642625	1.00449	0.0056431
circ_001121	92.56	92.58	4.35	69.53	61.03	73.25	63.815	63	35.57	94.965	42.215	168.945	44.995	200.585	0.000311698	0.93393	1	3.99855	0.0212275	0.08086	-0.0185437	0.897554	1	2.00073	0.0092598	0.0604268	3.81043	0.0272471	0.129595	-0.843235	0.677074	1	0.092009	1	1	0.0751932	0.891426	1	0.592044	0.46991	1	0.24766	0.75898	1	0.26331	0.675447	0.988792	1.41673	0.171101
circ_001131	53.185	36.44	143.135	69.905	41.315	27.885	109.645	30.22	41.035	32.38	80.625	46.865	103.485	29.735	-0.545496	0.713502	0.946985	-1.03391	0.0126096	0.0523366	-1.85926	0.124517	0.42528	-0.782716	0.514389	0.883529	-1.79264	0.00323793	0.0236813	-1.41791	0.213026	1	0.360123	0.710217	1	-1.32591	0.210978	1	0.0995993	1	1	-0.656349	0.597791	1	-0.567176	0.734788	0.990988	-0.341752	0.71524
circ_001153	406.435	510.2	117.47	393.355	694.58	496.57	409.675	316.14	448.88	444.2	591.205	529.08	836.235	533.125	0.328038	0.251473	0.633445	1.74354	0.0057143	0.026575	-0.373916	0.626935	0.933508	-0.160173	0.855965	1	2.56385	1.75307e-07	4.26453e-06	0.13185	0.280567	1	0.50025	0.216064	1	0.336165	0.311523	1	0.490646	0.201436	1	0.010988	0.867573	1	-0.484144	0.357075	0.818001	-0.0151204	0.807332
circ_001157	0.001	396.62	0.001	300.155	0.001	197	0.001	466.945	0.001	366.28	0.001	371.21	0.001	400.055	18.5974	3.86052e-21	2.50505e-19	18.1953	1.87764e-12	4.0265e-11	18.8329	5.09734e-22	3.08792e-20	18.5019	1.82311e-17	7.43569e-16	0	1	1	0	1	1	0	1	1	-0.607512	0.35711	1	-0.350306	0.235363	1	0.107963	0.881712	1	17.5878	2.53936e-09	7.68491e-08	18.4826	6.36426e-22
circ_001158	15.92	138.77	6.915	97.38	13.09	94.625	2.42	62.605	2.175	107.495	5.535	138.205	18.45	234.65	3.12378	0.00434288	0.0357217	3.81582	0.000979475	0.0057869	4.6932	0.00571603	0.0427218	4.64208	8.96096e-05	0.00108866	0.920664	1	1	-0.153992	1	1	1.73697	0.53359	1	-0.0414041	1	1	0.77992	0.344027	1	0.763701	0.19759	1	2.85376	0.0185585	0.13781	5.62711	5.45998e-05
circ_001160	18.735	41.605	1.7	46.735	1.83	59.735	18.28	46.425	0.001	64.07	19.545	81.23	18.185	78.17	1.15102	0.30963	0.709112	4.7809	0.0156172	0.0627941	1.34464	0.229092	0.596053	2.05521	0.0674151	0.293021	0.106309	1	1	-14.158	0.19626	1	-0.104051	1	1	0.354073	0.711357	1	0.464747	0.677344	1	-0.0553976	0.912421	1	5.02866	0.00993837	0.0822239	15.9674	0.000496432
circ_001161	3659.18	14616.9	4203.14	12654.4	6609.82	12696.1	2451.76	7471.85	2570.59	13003.1	4545.02	10179.5	6035.44	12888.1	1.99805	1.4175e-08	3.67921e-07	1.5901	9.11078e-05	0.000717741	1.60765	9.65294e-11	2.77763e-09	1.16331	6.34235e-06	9.1683e-05	0.653146	0.312831	0.658189	0.0682819	0.264011	1	0.409174	0.181928	1	0.0047406	0.813	1	0.799324	0.011732	0.336721	0.340375	0.289735	1	0.941698	0.00685943	0.0611499	2.33869	5.27512e-10
circ_001169	7.775	1057.3	3	1163.16	11.25	855.79	0.001	1486.41	0.001	1244.08	0.001	891.15	13.38	1377.63	7.08732	3.27642e-29	4.78357e-27	8.59888	4.93253e-37	8.15982e-35	20.5034	3.96985e-39	7.6155e-37	19.7653	9.27124e-38	1.32347e-35	1.90689	0.71202	0.936251	0	1	1	13.7078	0.435602	1	-0.442727	0.289271	1	-0.256764	0.359492	1	0.628454	0.0915389	1	6.24926	5.17028e-23	8.49404e-21	20.2466	6.04689e-45
circ_001185	0.001	187.2	6.04	198.095	0.001	195.975	0.001	219.21	3.745	183.995	0.001	244.615	0.001	232.28	17.5142	2.51787e-11	9.19024e-10	5.0355	5.20457e-07	5.68575e-06	17.742	1.53984e-11	4.79015e-10	17.9002	2.71619e-11	7.75471e-10	-12.5603	0.4832	0.803765	11.8708	0.732491	1	0	1	1	-0.0155228	0.929715	1	-0.252647	0.453808	1	-0.0746479	0.817995	1	17.5803	1.54678e-10	5.55874e-09	5.61856	2.62736e-08
circ_001188	202.81	112.535	15.06	133.705	168.435	192.485	178.065	113.965	235.74	140.625	257.37	166.315	226.95	194.61	-0.849755	0.158893	0.500236	3.15026	0.00136163	0.00765422	-0.643813	0.394708	0.765346	-0.629926	0.237524	0.657241	3.4834	0.000164428	0.00204439	0.404793	0.0987892	0.877212	-0.181469	0.728846	1	0.525693	0.302048	1	0.303262	0.697848	1	0.226668	0.756958	1	0.192554	0.606943	0.953722	-0.745343	0.0436073
circ_001190	194.915	44.765	8.77	60.815	171.495	45.335	63.43	40.61	38.575	10.67	36.7	34.425	128.615	16.295	-2.1224	0.000987834	0.010121	2.79378	0.04646	0.151979	-0.64333	0.709254	0.980717	-0.0923234	1	1	4.28945	1.00774e-05	0.000161094	-0.717499	0.733052	1	1.80921	0.0955984	0.780202	-0.423802	0.758522	1	-1.92827	0.201381	1	-1.07903	0.433249	1	-1.91947	0.0075942	0.0666666	-1.85411	0.185859
circ_001193	31.4	84.49	58.61	77.425	11.62	43.06	38.43	84.93	45.725	159.075	23.565	150.03	18.755	157.47	1.42802	0.120396	0.429065	0.401653	0.951869	1	1.14404	0.171659	0.507917	2.67053	0.0032157	0.0256806	-2.33454	0.0327068	0.148705	0.25075	0.69754	1	-0.32937	0.911009	1	-0.846451	0.514282	1	0.905361	0.185085	1	0.069826	0.969754	1	1.88974	0.235641	0.693518	1.79865	0.00643186
circ_001195	0.001	66.34	0.001	65.475	0.001	55.255	0.001	92.9	0.001	56.22	0.001	71.88	0.001	66.18	16.0176	0.000158273	0.00194592	15.9987	0.000762973	0.00462578	16.5034	0.000121255	0.00134196	16.1333	0.00166872	0.0150053	0	1	1	0	1	1	0	1	1	-0.244839	0.911799	1	-0.724595	0.373849	1	-0.119195	0.85679	1	15.7538	0.00424297	0.0416299	15.7788	0.00356866
circ_001206	0.001	263.6	0.001	215.785	1.625	490.845	0.001	385.405	0.001	849.2	0.001	571.005	0.001	778.41	18.008	3.82313e-15	1.65386e-13	17.7192	2.3658e-11	4.64339e-10	18.556	1.36588e-19	6.28849e-18	19.1231	6.94819e-25	3.77849e-23	10.6662	1	1	0	1	1	0	1	1	1.18567	0.00281321	0.155852	1.13973	0.000799993	0.064228	0.447027	0.278714	1	8.23868	2.47616e-19	2.58872e-17	19.6957	7.10983e-39
circ_001209	405.185	337.145	52.24	261.045	424.97	327.815	412.335	373.955	364.66	417.19	465.61	372.605	571.215	386.53	-0.265212	0.638747	0.913813	2.32107	0.000538344	0.00340657	-0.140952	0.882149	1	-0.321475	0.430206	0.84692	3.02413	2.87615e-07	6.43682e-06	-0.177265	0.75058	1	0.294912	0.449097	1	0.328583	0.321739	1	0.15784	0.747969	1	0.0529334	1	1	-0.374479	0.602105	0.953722	0.194153	0.754369
circ_001216	0.001	32.89	0.001	19.4	73.52	84.34	0.001	0.001	16.955	7.115	2.86	42.81	6.045	27.72	15.0054	0.011241	0.0781932	14.2438	0.256263	0.520619	0	1	1	3.90386	0.0458308	0.22367	16.1658	0.000278587	0.003181	14.0494	0.114678	0.913327	1.07973	1	1	2.12016	0.0715563	0.882278	12.7966	0.544098	1	-0.627021	0.629896	1	0.19808	0.730859	0.990988	-1.25278	0.570228
circ_001217	43.645	95.955	43.75	59.15	129.475	161.35	172.725	158.16	120.76	114.33	76.675	315.1	62.435	73.955	1.13654	0.164806	0.509793	0.435095	1	1	-0.127092	0.853534	1	2.03898	5.70706e-05	0.000716205	1.56532	0.0867207	0.300435	-0.516334	0.813261	1	-0.296401	0.816905	1	1.44774	0.155421	1	-0.468181	0.372987	1	-2.09109	2.95498e-05	0.00542732	0.31752	0.463298	0.871308	-0.0789386	0.750049
circ_001222	0.001	60.345	2.955	91.34	111.23	63.785	10.605	139.12	10.335	144.66	0.001	71.68	54.355	136.2	15.8809	0.00051282	0.00554605	4.95002	0.000827075	0.00493687	3.71351	0.000378603	0.00385639	16.1293	0.00184663	0.0162219	5.23424	0.000747856	0.00721163	-0.0372062	1	1	15.7301	0.00527899	0.129629	-0.51803	0.593751	1	0.0563362	1	1	0.926084	0.278141	1	-0.802257	0.414611	0.856935	3.80706	0.000444111
circ_001237	0.001	127.205	3.49	163.875	34.855	125.695	17.83	87.53	25.05	181.485	8.58	189.305	34.345	208.85	16.9568	3.11124e-07	6.37531e-06	5.55322	1.47988e-06	1.49017e-05	2.29547	0.0299175	0.155255	4.46359	4.50291e-06	6.85643e-05	3.32007	0.171383	0.459898	0.490504	0.630248	1	2.00105	0.302216	1	-0.382669	0.658754	1	1.052	0.0615029	0.832883	0.141755	0.878493	1	1.85049	0.0360399	0.221636	2.85697	5.39644e-05
circ_001238	817.07	216.29	34.715	858.035	669.6	222.88	595.715	655.13	799.35	383.265	933.755	1214.32	427.945	486.285	-1.91749	0.000142569	0.00181001	4.62741	3.67128e-14	9.30474e-13	0.137159	0.344337	0.727343	0.379033	0.147197	0.505497	4.26967	0.00936612	0.0579043	0.424205	0.0508206	0.624926	-1.12562	0.0572774	0.621943	-1.94477	0.101118	0.952115	-0.773439	0.0247052	0.522615	-1.32027	0.0110735	0.418355	-1.58703	0.399854	0.839341	-1.06049	0.00741753
circ_001246	3389.39	4263.35	707.605	4414.83	3304.95	3844.55	4645.06	4240.94	3106.95	5144.8	4061.09	4535.52	4547.74	4798.72	0.330962	0.211034	0.588275	2.64134	1.06857e-11	2.17089e-10	-0.131315	0.89387	1	0.159403	0.45892	0.84692	2.22361	4.11882e-07	8.7089e-06	-0.580197	0.323842	1	0.163284	0.601182	1	-0.199541	0.686184	1	0.27873	0.42079	1	0.0813786	0.916011	1	0.218186	0.364186	0.825274	0.727612	0.0450338
circ_001267	1466.78	2199.28	1604.6	955.66	684.49	1034.16	991.215	2048.42	421.655	807.375	436.9	280.99	691.44	204.055	0.58438	0.05787	0.264032	-0.747644	0.000256066	0.00174426	1.04724	0.000739203	0.00686581	-0.636784	0.0825368	0.341511	-1.22911	5.69477e-06	9.80377e-05	-1.23313	0.0158622	0.322724	0.662301	0.141805	0.961316	0.11389	0.661254	1	-1.3432	3.59297e-05	0.00673083	-0.461561	0.27017	1	0.595358	0.115792	0.471707	0.937176	0.0168199
circ_001269	11.35	89.95	21.575	75.865	35.785	85.71	20.075	60.98	11.65	93.005	28.025	93.015	28.24	97.025	2.98643	0.0136106	0.0908408	1.81407	0.153402	0.36253	1.60294	0.151804	0.485352	1.73075	0.105703	0.409197	0.729994	0.767961	0.976446	-0.78507	0.833963	1	0.0110257	1	1	0.176029	0.769655	1	0.608972	0.448944	1	0.0608931	1	1	1.26011	0.149077	0.540817	2.99698	0.00583948
circ_001275	343.53	73.34	113.515	55.22	339.695	62.12	271.595	55.675	417.17	61.355	552.435	77.95	469.755	90.01	-2.22776	9.44211e-05	0.0013129	-1.03962	0.0555988	0.17354	-2.28636	7.18641e-05	0.000879953	-2.82518	4.94328e-09	1.15209e-07	1.58136	0.0591608	0.229864	0.619178	0.0115425	0.287022	-0.233896	0.53014	1	0.169867	0.781202	1	0.140151	0.95136	1	0.207536	0.837108	1	-2.45111	0.000329426	0.00450999	-2.76538	2.22009e-08
circ_001289	316.12	29.825	138.355	71.25	461.04	47.155	660.325	123.96	371.005	58.09	736.07	161.36	578.31	70.395	-3.40588	2.41619e-08	6.13502e-07	-0.957413	0.0144505	0.0589213	-2.4133	1.80036e-08	3.70038e-07	-2.18956	3.22513e-09	7.83638e-08	1.73652	0.000766921	0.00721163	-0.831738	0.186919	1	-0.348	0.330155	1	-0.595479	0.59453	1	-1.09351	0.0981664	0.919492	-1.19674	0.0538456	0.972751	-3.28941	5.96751e-09	1.71566e-07	-2.67508	1.58632e-07
circ_001293	46.675	101.795	47.02	64.87	23.095	0.001	99.59	14.345	0.001	10.26	96.17	8.64	12.215	6.71	1.12494	0.144377	0.470068	0.464277	1	1	-2.79545	0.0487834	0.21976	-3.47648	0.00904615	0.0594421	-1.02569	0.372187	0.711927	-16.6037	0.000383141	0.0238186	-2.97693	0.0279065	0.440523	-15.9853	0.0207692	0.500268	-0.483517	1	1	-0.364719	1	1	-14.4953	0.227046	0.679051	13.3247	0.354118
circ_001304	171.375	175.625	11.84	154.615	216.075	199.29	139.94	259.84	150.45	224.195	205.215	257.045	227.98	268.77	0.0353416	0.892011	1	3.70694	8.79954e-05	0.000702749	0.892815	0.0297039	0.155255	0.324885	0.351302	0.779003	4.18979	3.54718e-06	6.30047e-05	0.104476	0.532577	1	0.151771	0.793637	1	0.366189	0.423358	1	-0.212869	0.539947	1	0.0643512	1	1	-0.116663	0.964131	1	0.57547	0.339086
circ_001311	10.765	94.795	0.001	75.01	3.89	107.965	5.81	93.725	14.24	78.16	3.31	89.81	24.125	135.2	3.13846	0.00650205	0.0513135	16.1948	0.000177455	0.00129241	4.01182	0.00133627	0.0114779	4.76197	0.00278957	0.0229186	11.9256	0.710883	0.936251	1.29334	0.582073	1	2.86563	0.271481	1	0.525409	0.388479	1	-0.262003	0.692534	1	0.590147	0.468339	1	4.79465	0.000181023	0.00273917	2.45648	0.0869377
circ_001316	4.125	153.5	1.905	192.32	0.001	98.505	0.001	127.15	7.91	161.54	10.74	153.58	2.765	187.72	5.2177	2.90124e-06	4.91108e-05	6.65757	2.35278e-08	3.3633e-07	16.9562	7.8759e-06	0.000109219	3.83792	0.000416352	0.00421315	-10.8956	1	1	12.9495	0.500456	1	-1.95764	0.716096	1	-0.96524	0.202682	1	0.34536	0.610491	1	0.289592	0.761918	1	16.5879	9.53443e-05	0.001502	4.35207	4.86983e-06
circ_001319	213.575	187.91	15.725	122.89	150.57	104.425	224.5	222.11	116.03	174.92	177.615	206.52	184.15	141.255	-0.184701	0.83462	1	2.96624	0.00274633	0.0138876	-0.0154411	0.830359	1	0.217528	0.631589	0.930428	3.2593	0.000635036	0.00623338	-0.952218	0.162973	1	0.052128	0.944499	1	-0.2349	0.86734	1	-0.344579	0.334695	1	-0.54798	0.287025	1	-0.527967	0.501184	0.906229	0.592197	0.3064
circ_001321	0.001	582.055	0.001	678.975	0.001	517.65	0.001	721.53	0.001	579.69	2.86	826.89	0.001	640.405	19.1508	9.58329e-27	1.20272e-24	19.373	1.28876e-28	1.35671e-26	19.4607	3.99408e-32	5.10798e-30	8.17554	1.36987e-34	1.42217e-32	0	1	1	0	1	1	-11.4818	1	1	-0.391381	0.417475	1	-0.315778	0.221807	1	-0.368711	0.160988	1	18.9816	2.28831e-22	3.28945e-20	19.1449	7.74307e-30
circ_001331	583.575	607.43	75.87	910.59	811.055	696.265	729.285	1005.07	689.675	723.965	869.535	823.57	861.315	1121.33	0.0578001	0.746475	0.965541	3.5852	1.73271e-14	4.77732e-13	0.462734	0.0557459	0.243968	-0.0783528	1	1	3.4182	1.59359e-12	9.38539e-11	-0.080566	0.606358	1	-0.0137031	0.982431	1	-0.387165	0.396554	1	-0.473297	0.0672559	0.852564	0.445248	0.286854	1	-0.220163	0.787402	1	0.0700033	0.964417
circ_001349	315.355	301.77	18.5	389.53	542.28	391.4	527.58	556.655	390.6	393.5	320.555	275.78	808.97	364.235	-0.0635274	1	1	4.39614	7.49591e-08	9.43507e-07	0.0773936	0.486433	0.839183	-0.217054	0.759894	0.98657	4.87344	3.75824e-14	2.62842e-12	-0.433698	0.688229	1	1.33551	0.00056206	0.0295781	0.00690931	0.889161	1	-0.50042	0.103422	0.934422	0.401352	0.425055	1	-0.470394	0.376339	0.829099	0.0106717	0.797515
circ_001351	0.001	118.59	0.001	102.18	0.001	94.435	0.001	305.055	0.001	832.84	0.001	50.21	0.001	240.95	16.8556	1.66005e-06	2.93778e-05	16.6408	3.1389e-05	0.000281771	18.2187	9.43752e-17	3.74572e-15	15.6157	0.00868813	0.0576851	0	1	1	0	1	1	0	1	1	-0.113719	1	1	1.44897	1.4117e-05	0.00396688	2.26269	0.000909894	0.0835586	16.527	4.48369e-05	0.000747282	19.6677	3.35824e-37
circ_001355	41.615	428.775	74.185	490.155	29.28	561.755	42.63	360.81	20.165	492.335	18.47	508.15	25.755	483.35	3.36505	1.20566e-09	3.52052e-08	2.72404	1.08232e-07	1.31929e-06	3.0813	4.00506e-07	6.88034e-06	4.782	1.16972e-15	4.04794e-14	-1.34121	0.0936842	0.31864	-1.08002	0.678945	1	0.479669	0.817569	1	0.196703	0.444179	1	0.448401	0.262297	1	-0.0721862	0.673086	1	4.26195	2.19747e-12	1.05295e-10	4.60971	2.8915e-18
circ_001362	132.79	88.96	3.49	73.93	200.51	188.625	163.24	95.505	99.72	170.085	157.8	130.155	225.73	156.115	-0.577918	0.415191	0.799258	4.40486	0.00375586	0.0182743	-0.773346	0.283102	0.658283	-0.277866	0.758236	0.986225	5.8443	2.13672e-08	7.47185e-07	-0.71104	0.432923	1	0.516501	0.361774	1	1.35129	0.0263181	0.540009	0.832608	0.158328	0.994335	0.262378	0.798276	1	-0.0881533	1	1	0.770301	0.165564
circ_001371	0.001	36.285	0.001	19.32	0.001	24.88	0.001	68.935	0.001	173.885	0.001	60.21	0.001	86.395	15.1471	0.00764978	0.0576448	14.2378	0.143979	0.342356	16.0729	0.000924828	0.00833154	15.8777	0.00435683	0.0325196	0	1	1	0	1	1	0	1	1	0.364891	0.855305	1	1.33482	0.0271495	0.522615	0.520945	0.645716	1	14.6027	0.0748746	0.369553	17.4078	9.97152e-10
circ_001382	0.001	105.78	0.001	194.575	0.001	197	0.001	14.79	0.001	0.001	0.001	546.1	0.001	601.28	16.6907	0.00290978	0.0257472	17.57	0.000649149	0.00404148	13.8523	0.33538	0.719899	19.0588	5.66897e-25	3.23698e-23	0	1	1	0	1	1	0	1	1	0.0178693	0.892182	1	-13.8523	0.274439	1	0.138872	0.787961	1	17.5878	4.19501e-09	1.23699e-07	0	1
circ_001383	0.001	238.335	0.665	610.13	0.001	52.87	0.001	500.94	0.001	400.275	0.001	868.33	0.001	413.75	17.8626	9.43177e-12	3.55365e-10	9.84155	1.12887e-12	2.46647e-11	18.9343	5.69324e-16	2.18431e-14	19.7279	1.23325e-28	8.80232e-27	-9.37721	1	1	0	1	1	0	1	1	-3.5286	3.56468e-05	0.00394967	-0.323646	0.428259	1	-1.06948	0.105364	1	15.6902	0.00847024	0.0721539	18.6106	1.11662e-24
circ_001401	53.345	1136.86	65.95	1239.27	146.38	1103.24	167.29	1607.38	143.945	1579.43	114.505	1414.08	98.97	1255.22	4.41355	2.02324e-22	1.39009e-20	4.23197	3.53535e-21	2.27441e-19	3.26429	3.80499e-20	1.90415e-18	3.62638	1.57647e-22	6.92432e-21	1.15027	0.201358	0.509773	-0.216834	0.887213	1	-0.210347	0.81312	1	-0.167737	0.809733	1	-0.0253025	0.765158	1	-0.171918	0.436688	1	2.91396	8.03807e-13	4.01904e-11	3.45582	5.40389e-19
circ_001404	1623.55	1178.97	25.185	1586.46	1845.79	1796.2	1345.39	1488.37	1174.52	1669.75	801.965	1156.13	1477.84	1100.23	-0.461625	0.3263	0.721814	5.9771	3.93414e-34	5.06193e-32	0.145704	0.338064	0.723257	0.527699	0.0389011	0.198326	6.19553	3.74356e-33	2.09452e-30	-0.195953	0.828187	1	0.881874	0.0063267	0.145646	0.179137	0.387669	1	0.165904	0.725081	1	-0.0715047	0.676514	1	-0.0392904	0.838349	1	0.507561	0.278029
circ_001409	0.001	984.475	0.001	729.24	0.001	738.755	0.001	1190.18	1.755	754.365	0.001	666.1	0.001	510.77	19.909	2.65022e-37	5.15909e-35	19.476	7.83915e-26	5.67359e-24	20.1827	1.08364e-29	1.13388e-27	19.3454	2.00284e-32	1.90604e-30	0	1	1	10.7773	1	1	0	1	1	0.0187023	0.825609	1	-0.657845	0.0682658	0.852564	-0.383065	0.175685	1	19.4947	2.25513e-27	4.32233e-25	8.74765	2.24623e-28
circ_001414	281.85	219.92	50.25	266.62	279.985	312.065	347.235	331.39	241.525	319.88	299.41	412.345	390.22	409.985	-0.357949	0.564583	0.890657	2.40759	0.000291142	0.0019376	-0.0673823	0.787836	1	0.46173	0.121611	0.443705	2.47815	0.000800111	0.00733873	-0.52374	0.633113	1	0.382165	0.344995	1	0.227062	0.466003	1	-0.0509993	0.814567	1	-0.00828079	0.842178	1	0.156497	0.539429	0.924506	0.405358	0.466638
circ_001415	77.84	65.785	5.62	133.69	34.545	131.335	108.35	67.165	64.485	93.93	134.47	93.75	241.625	64.075	-0.242753	0.873823	1	4.57218	3.40193e-05	0.000303034	-0.689918	0.430633	0.791786	-0.520394	0.563048	0.896018	2.61983	0.187523	0.484553	-0.748664	0.544288	1	0.845485	0.171899	1	-0.0256401	0.890844	1	0.483876	0.598003	1	-0.549057	0.459183	1	1.9267	0.014408	0.111203	0.542622	0.587966
circ_001418	47.985	32.63	230.465	7.74	48.255	32.83	34.835	9.44	17.975	4.175	23.765	42.24	21.415	40.53	-0.556385	0.692177	0.946985	-4.89607	3.66823e-13	8.32905e-12	-1.88368	0.312788	0.69771	0.829771	0.474859	0.856696	-2.2558	0.000438353	0.00458428	-0.954546	0.619738	1	-0.150217	1	1	2.08461	0.234254	1	-1.17701	0.866117	1	-0.0596197	0.95515	1	-0.555664	0.725092	0.990988	-2.10614	0.339904
circ_001422	3.6	8709.8	3.41	6995.35	3.695	29266.2	7.88	9731.84	1.78	20146.2	0.001	7485.77	0.001	16926.8	11.2404	6.39006e-77	7.46359e-74	11.0024	9.97417e-77	1.15501e-73	10.2703	1.52191e-87	1.75172e-84	22.8357	5.27845e-92	6.02799e-89	0.115803	1	1	-2.14632	0.84318	1	0	1	1	2.06477	7.20626e-14	3.99227e-11	1.04972	0.000211091	0.0255303	1.17708	4.9344e-05	0.00776816	12.9514	1.14639e-79	1.31834e-76	13.4663	9.90981e-88
circ_001424	120.315	0.001	42.375	0.001	184.105	0.001	125.615	2.905	162.57	0.001	244.565	11.15	205.33	0.001	-16.8765	1.53868e-06	2.76489e-05	-15.3709	0.00143695	0.00803858	-5.43433	6.86469e-05	0.000849598	-4.4551	2.56111e-07	4.64253e-06	2.11924	0.00695666	0.0449971	0.372052	0.246454	1	-0.252274	0.646449	1	0	1	1	-11.5043	1	1	-13.4448	0.491819	1	-17.4902	6.36265e-09	1.78465e-07	-17.3107	1.09578e-09
circ_001425	15.1	6.88	0.001	21.415	0.001	23.26	8.385	10.195	0.001	7.405	29.285	15.115	81.575	0.001	-1.13407	0.62416	0.913812	14.3863	0.193877	0.429273	0.281979	1	1	-0.954181	0.70915	0.958452	0	1	1	-13.0336	0.442498	1	1.47797	0.278851	1	0.119229	1	1	-0.46129	0.895932	1	-13.8837	0.37245	1	14.5056	0.182149	0.603665	12.8543	0.458411
circ_001429	69.725	39.455	82.29	51.175	96.065	43.365	65.37	50.13	154.42	31.42	149.42	98.965	250.665	100.285	-0.821468	0.513159	0.863645	-0.685278	0.100323	0.261066	-0.382954	0.883804	1	-0.594383	0.458654	0.84692	0.223294	0.969438	1	1.24016	0.0156951	0.322724	0.746387	0.168439	1	-0.238908	0.94583	1	-0.673991	0.518084	1	0.0191155	0.961214	1	-1.14748	0.226508	0.679051	-2.2971	0.000788422
circ_001437	79.99	68.895	0.001	43.155	31.74	29.63	29.215	17.55	13.095	38.305	10.44	107.855	167.795	132.67	-0.21542	0.948685	1	15.3972	0.0564677	0.175307	-0.735238	0.782768	1	3.3689	0.00841216	0.0566328	14.954	0.112371	0.355207	-1.15769	0.705146	1	4.00651	0.000124553	0.010587	-0.542469	0.86759	1	1.12606	0.644339	1	0.298749	0.87622	1	-0.0992435	0.969124	1	1.54852	0.572135
circ_001438	96.85	140.29	50.62	129.295	339.235	286.205	249.995	114.025	193.425	360.385	184.51	122.22	263.68	208.115	0.534588	0.319329	0.715467	1.35289	0.265433	0.525895	-1.13255	0.074786	0.300974	-0.594219	0.342469	0.775991	2.74451	9.50813e-05	0.00125172	-0.370125	0.95229	1	0.515089	0.350445	1	1.14638	0.0956735	0.948938	1.66019	0.000249852	0.0255303	0.767901	0.240486	1	-0.245236	0.83332	1	0.897765	0.0492509
circ_001444	199.06	20.71	3.485	17.835	375.555	34.26	128	28.46	298.55	39.165	112.6	51.32	97.755	33.245	-3.2648	0.00198724	0.0185687	2.35548	0.425798	0.685544	-2.16914	0.0188608	0.108544	-1.13361	0.203475	0.599774	6.75172	2.00223e-13	1.31794e-11	1.22183	0.00886304	0.241896	-0.203964	0.811717	1	0.941814	0.441979	1	0.460629	0.719439	1	-0.626384	0.6781	1	-3.45443	1.11136e-07	2.84015e-06	-2.93034	3.62086e-08
circ_001446	7919.45	2771.97	4018.58	5170.34	9781.83	3062.46	9175.35	5986.5	6013.1	1680.01	17021.8	5506.46	10454.4	2012.91	-1.51449	5.40739e-06	8.77199e-05	0.363572	0.82149	0.9707	-0.616051	0.208275	0.557685	-1.62819	4.31207e-09	1.02591e-07	1.28342	0.0021184	0.016932	-0.609656	0.303229	1	-0.703279	0.031838	0.475419	-0.755567	0.0829322	0.918889	-1.83324	4.60381e-07	0.000172489	-1.45184	2.7503e-07	0.000151542	-1.67541	2.4516e-05	0.000433744	-1.83964	2.83045e-07
circ_001465	118.43	178.375	67.65	223.435	47.43	175.325	89.49	138.64	106.845	157.45	57.905	296.775	65.075	214.62	0.590879	0.226397	0.611668	1.72369	0.0737479	0.215114	0.631545	0.182251	0.531065	2.35761	5.90371e-06	8.64363e-05	-0.51229	0.478013	0.803765	0.255721	0.381363	1	0.168415	0.948684	1	-0.349823	0.667061	1	0.18355	0.800893	1	-0.467585	0.305034	1	1.88616	0.0022532	0.0242166	0.559374	0.387493
circ_001475	50.69	422.375	13.71	685.115	99.91	555.75	899.28	848.53	598.555	1038.76	2749.8	3302.03	3210.34	3770.32	3.05875	8.79134e-10	2.70218e-08	5.64305	5.64557e-21	3.26878e-19	-0.0838047	0.848211	1	0.264024	0.225465	0.642098	2.8654	0.0114099	0.0675537	-0.587287	0.333794	1	0.223399	0.461396	1	-0.30191	0.563775	1	0.291818	0.431645	1	0.191338	0.629767	1	2.47574	1.50548e-08	4.12215e-07	0.7953	0.0337024
circ_001493	578.58	7078.6	88.855	3138.99	747.91	5414.84	66.3	3601.5	254.31	1462.02	158.26	1925.36	428.45	945.085	3.61288	1.02972e-26	1.20272e-24	5.1427	4.39849e-21	2.68076e-19	5.76345	4.49774e-33	6.47112e-31	3.60476	2.05054e-27	1.30095e-25	3.07334	9.54232e-08	2.60435e-06	1.93951	0.000333438	0.0238186	1.43683	0.0176089	0.318981	0.786619	0.00808639	0.271179	-1.30064	0.000209768	0.0255303	-1.02661	0.000538991	0.0539971	2.85598	4.80895e-14	3.07239e-12	2.5233	1.58788e-07
circ_001496	10.92	3415.3	17.25	3748.38	27.53	2979.63	37.74	2733.05	11.895	2885.81	21.23	4505.68	8.97	4755.81	8.28889	3.76995e-52	1.46777e-49	7.76353	1.07439e-40	3.11037e-38	6.17828	4.80936e-46	1.84519e-43	7.7295	1.01079e-65	3.84772e-63	0.674408	0.947272	1	-1.66574	0.566852	1	-1.24292	0.597407	1	-0.331134	0.410453	1	0.0784618	0.953483	1	0.0779463	0.933317	1	6.75798	1.18245e-36	4.53272e-34	7.92248	1.49117e-44
circ_001497	0.001	251.05	0.001	263.485	0.001	35.295	0.001	486.935	0.001	374.35	0.001	0.7	0.001	0.575	17.9376	0.000153781	0.00191295	18.0074	0.000240211	0.00165574	18.8934	6.07358e-17	2.49668e-15	9.45121	1	1	0	1	1	0	1	1	0	1	1	-2.90019	0.0954335	0.948938	-0.379341	0.325235	1	-0.283793	1	1	15.1072	0.0928834	0.41725	18.514	4.31152e-21
circ_001499	0.001	524.05	18.195	718.43	0.001	337.61	5.695	623.3	0.001	474.295	0.001	1062.5	0.001	731.66	18.9993	9.48167e-24	8.51892e-22	5.30323	3.20627e-20	1.61429e-18	6.77409	4.61414e-26	3.79348e-24	20.019	1.30557e-40	2.48493e-38	-14.1513	0.0688436	0.255331	-12.4755	0.731116	1	0	1	1	-1.08949	0.0441312	0.729811	-0.394142	0.179079	1	-0.538218	0.062525	0.998952	18.365	1.52077e-11	5.8296e-10	18.8554	7.61163e-26
circ_001505	56.255	348.15	18.9	323.375	30.865	291.11	37.715	222.61	6.67	306.38	32.455	436.77	37.43	438.46	2.62966	1.89675e-06	3.30657e-05	4.09675	2.44055e-09	3.71863e-08	2.56131	2.329e-05	0.000304623	3.75036	1.37518e-11	4.02681e-10	0.707586	0.807664	0.993161	-2.49938	0.225156	1	0.205754	0.941728	1	-0.151644	0.906647	1	0.460804	0.392224	1	0.00557147	0.868066	1	3.23752	1.45843e-06	3.22538e-05	5.52149	7.08582e-14
circ_001523	62.23	102.16	0.001	107.515	85.925	23.165	73.955	50.045	19.135	40.155	33.75	79.39	14.955	69.115	0.715148	0.424172	0.802833	16.7142	5.36018e-06	5.12983e-05	-0.563422	0.73638	0.983264	1.23407	0.359907	0.79041	16.3908	8.56928e-05	0.00114155	-1.95043	0.136232	0.964957	-1.17426	0.626637	1	-2.21452	0.025289	0.528683	-0.317646	0.83	1	-0.199958	0.813556	1	-1.89113	0.103615	0.444617	1.06937	0.429886
circ_001525	10.215	97.685	10.81	85.445	12.315	96.01	13.26	155.16	18.165	100.51	5.09	130.14	5.425	109.92	3.25745	0.00120692	0.0120485	2.98263	0.0424555	0.141386	3.5486	7.5237e-05	0.000887035	4.67625	0.000126356	0.00144298	0.18805	1	1	0.454081	0.735719	1	0.0919575	1	1	0.168189	0.732555	1	-0.626418	0.280461	1	-0.243611	0.617624	1	2.96277	0.00352793	0.0352793	2.46811	0.0126624
circ_001532	173.65	32.37	185.64	66.04	95.03	28.675	264.375	60.925	187.905	52.895	182.675	101.085	182.345	79.41	-2.42345	0.00266966	0.0238028	-1.4911	0.000323401	0.00212783	-2.11748	0.0112557	0.0762075	-0.85371	0.200168	0.593746	-0.966053	0.0281137	0.132182	-0.492582	0.598804	1	-0.00260857	1	1	-1.20355	0.270588	1	-0.203903	0.879373	1	-0.348176	0.592778	1	-1.72859	0.0790865	0.380684	-1.8288	0.000530374
circ_001533	53.28	0.001	10.175	0.001	56.005	0.001	55.68	0.001	105.615	0.001	62.345	0.001	28.115	13.47	-15.7013	0.00165352	0.0155751	-13.3127	0.20859	0.451491	-15.7649	0.00333158	0.0268158	-15.928	0.0044901	0.0330819	2.46053	0.103746	0.334558	0.923584	0.127696	0.953682	-1.14893	0.347276	1	0	1	1	0	1	1	13.7175	0.453094	1	-15.7733	0.00601244	0.0548755	-16.6885	2.46755e-06
circ_001543	241.14	0.001	166.91	0.001	175.58	0.001	276.665	0.001	147.12	0.001	315.885	0.001	210.635	0.001	-17.8795	2.86491e-13	1.11541e-11	-17.3487	1.62251e-11	3.23943e-10	-18.0778	1.94627e-12	6.40045e-11	-18.269	2.19284e-14	7.36535e-13	0.0730581	0.671964	0.929249	-0.911147	0.122921	0.929379	-0.584654	0.203038	1	0	1	1	0	1	1	0	1	1	-17.4218	1.55099e-08	4.14799e-07	-17.1666	9.43033e-09
circ_001545	3869.57	2806.12	8.825	4848.69	5050.02	4592.23	6803.3	5219.83	4784.76	4450.45	10414.8	6855.85	5467.06	6337.45	-0.463595	0.24396	0.631544	9.10178	1.61297e-55	9.33909e-53	-0.382231	0.400056	0.767558	-0.603225	0.0274806	0.152344	9.16048	4.29882e-58	4.81038e-55	-0.507789	0.482181	1	-0.929797	0.00141908	0.056003	-0.0784002	0.969668	1	-0.230052	0.283599	1	-0.113433	0.507934	1	-0.137097	0.973206	1	-0.104494	0.525252
circ_001548	5316.24	5881.83	1358.96	6486.39	5854.72	6679.18	8329.35	6803.07	5593.31	7982.94	8762.18	7608.9	10771.6	9013.56	0.145859	0.447553	0.827124	2.25491	1.52006e-08	2.20028e-07	-0.292019	0.651537	0.953398	-0.203604	0.555892	0.896018	2.1071	1.88644e-07	4.49133e-06	-0.574504	0.35126	1	0.297876	0.26948	1	0.0422563	0.662026	1	0.230734	0.537231	1	0.244409	0.478025	1	0.190072	0.395794	0.836338	0.513219	0.202263
circ_001560	152.925	78.825	1.665	94.535	224.78	72.36	58.695	77.86	197.85	119.97	77.195	104.875	30.005	68.94	-0.956099	0.189779	0.55694	5.82725	0.000223238	0.00155729	0.407645	0.648378	0.953398	0.442091	0.523206	0.887909	7.07685	4.11024e-08	1.24307e-06	1.7531	0.00503853	0.170852	-1.3633	0.245398	1	-0.385656	0.749046	1	0.623719	0.373392	1	-0.605258	0.436421	1	-1.63525	0.0363468	0.222334	-0.721733	0.104953
circ_001561	0.001	17.56	0.001	25.495	49.135	20.325	2.67	3.315	27.51	16.375	0.001	10.29	0.001	17.84	14.1	0.0845419	0.352915	14.6379	0.0695255	0.205384	0.312169	1	1	13.329	0.419877	0.839788	15.5845	0.00461179	0.032662	3.36504	0.0885388	0.84568	0	1	1	-0.326959	1	1	2.30441	0.483803	1	0.793873	0.913679	1	-1.2735	0.403103	0.842852	-0.748461	0.592726
circ_001562	156.25	107.87	22.31	183.24	158.23	125.935	188.865	124.61	129.155	193.745	121.88	191.105	199.965	192.695	-0.534563	0.566065	0.890657	3.03797	0.000323307	0.00212783	-0.599936	0.41215	0.77607	0.648904	0.159266	0.527778	2.82626	0.00170597	0.0140366	-0.548252	0.649394	1	0.714286	0.253751	1	-0.541055	0.404749	1	0.636739	0.255202	1	0.0119536	0.971152	1	-0.329344	0.69535	0.990988	0.585056	0.277191
circ_001563	0.001	19.145	0.001	17.76	0.001	82.365	0.001	3.825	0.001	66.53	0.001	27.565	24.03	26.56	14.2247	0.074434	0.320808	14.1163	0.124622	0.30902	11.9012	0.718314	0.980717	14.7505	0.0643461	0.285927	0	1	1	0	1	1	14.5525	0.212259	1	2.2134	0.0218839	0.51354	4.12047	0.00778667	0.257418	-0.0535825	0.941552	1	16.3297	0.000159047	0.00243872	16.0217	0.000523782
circ_001569	8.345	0.001	0.001	10.15	64.13	5.37	12.155	0.001	22.79	5.375	0.001	6.765	5.725	25.035	-13.0267	0.398361	0.78347	13.3092	0.339404	0.614109	-13.5693	0.479741	0.835155	12.7239	0.453355	0.84692	15.9687	0.000876471	0.00790945	0.906851	0.582515	1	12.4831	0.7459	1	-0.918486	0.882753	1	12.392	0.640663	1	1.88778	0.443087	1	-3.57801	0.0253126	0.171233	-2.08406	0.359567
circ_001571	7.69	0.001	47.045	0.001	0.001	0.001	5.6	14.835	0.001	2.135	32.63	12.815	11.95	9.21	-12.9088	0.396308	0.781905	-15.5218	0.000930626	0.00552648	1.40551	0.625682	0.933003	-1.34837	0.562852	0.896018	-15.5218	0.00223241	0.017592	-12.4512	0.732256	1	-1.44919	0.555976	1	0	1	1	-2.7967	0.458521	1	-0.47656	1	1	0	1	1	11.06	1
circ_001581	2157.01	3399.35	2134.38	1357.43	1950.35	1574.62	1102.02	1537.68	965.175	799	1444.18	333.11	1559.39	230.07	0.656223	0.0170243	0.108658	-0.652931	0.0162056	0.0644883	0.48061	0.0763025	0.306008	-2.11618	2.88137e-08	5.98278e-07	-0.130081	0.261557	0.598533	-0.191288	0.736742	1	0.110731	0.783867	1	0.214121	0.45943	1	-0.944493	0.00594104	0.215411	-0.533926	0.161238	1	-0.308729	0.565649	0.945016	-0.272595	0.262607
circ_001591	335.27	103.795	276.875	186.465	1002.23	108.44	459.03	198.7	1035.19	205.455	231.325	166.62	1102.67	202.91	-1.69159	0.00455548	0.03695	-0.57033	0.0441841	0.14577	-1.208	0.0160745	0.095561	-0.47336	0.493427	0.870574	1.85591	2.53096e-05	0.000367811	1.17324	3.43065e-05	0.00383889	2.25301	7.41191e-07	0.000273005	-0.782008	0.37122	1	0.0482306	1	1	0.284278	0.793018	1	-3.20824	1.0756e-07	2.81124e-06	-2.333	2.58366e-10
circ_001594	70.74	230.925	72.655	299.05	38.355	320.6	145.62	290.235	96.935	346.53	129.215	430.625	129.065	396.97	1.70683	0.00343474	0.0290708	2.04125	0.00117447	0.00680018	0.995013	0.0311987	0.160081	1.73666	4.23419e-05	0.000549482	-0.921647	0.14744	0.414536	-0.587119	0.818521	1	-0.00167573	1	1	0.100388	0.732403	1	0.255759	0.58841	1	-0.117402	0.615599	1	3.06329	3.74671e-06	7.55915e-05	1.83789	0.00030712
circ_001607	0.001	83.81	0.001	71.825	0.001	75.405	0.001	98.165	0.001	79.31	0.001	99.65	0.001	71.485	16.3548	2.50626e-05	0.000365913	16.1322	0.000234537	0.00162631	16.5829	2.62268e-05	0.00033918	16.6046	0.000145222	0.00162592	0	1	1	0	1	1	0	1	1	0.0701741	0.916829	1	-0.307706	0.624764	1	-0.479229	0.503998	1	16.2024	0.000439564	0.00587789	16.2752	9.44395e-05
circ_001611	18.915	0.001	242.14	0.001	36.48	0.001	35.21	0.001	8.52	0.001	28.94	0.001	83.375	0.001	-14.2072	0.215091	0.593916	-17.8855	4.4786e-16	1.44062e-14	-15.1037	0.0245213	0.135693	-14.8208	0.0763921	0.320735	-2.73066	1.64081e-05	0.000251516	-2.04706	0.283517	1	1.52655	0.188531	1	0	1	1	0	1	1	0	1	1	-15.1548	0.0460987	0.262443	-13.0566	0.255714
circ_001613	359.415	17.955	186.285	76.435	381.305	51.295	493.33	68.97	210.485	132.52	286.24	168.035	448.275	134.545	-4.32319	3.87591e-09	1.05281e-07	-1.28521	0.00163932	0.00903966	-2.83851	3.06672e-07	5.34817e-06	-0.768464	0.207018	0.60396	1.03343	0.300503	0.645417	-1.22884	0.0794745	0.782847	0.647159	0.264038	1	-0.575415	0.624153	1	0.942169	0.143004	0.994335	-0.320673	0.501535	1	-2.89406	0.000400668	0.0054208	-0.667507	0.127274
circ_001616	425.01	511.175	43.49	273.04	490.85	416.53	419.565	212.855	298.785	335.765	324.33	220.395	403.16	388.665	0.26632	0.332507	0.734119	2.65036	8.03414e-05	0.000650596	-0.979023	0.0429868	0.20195	-0.557371	0.260071	0.689097	3.49653	1.73623e-10	7.47247e-09	-0.489787	0.651054	1	0.31389	0.469867	1	0.609308	0.0888185	0.941221	0.657581	0.116426	0.937317	0.818436	0.0530916	0.972751	-0.236862	0.770944	0.992817	0.168344	0.842814
circ_001618	1158.04	1.56	603.805	0.001	990.96	0.001	1365.62	0.001	1066.14	23.01	1539.69	12.335	1128.2	0.001	-9.53592	4.15859e-39	1.21431e-36	-19.2037	3.02482e-34	4.37842e-32	-20.3811	5.25742e-38	8.64471e-36	-6.96374	1.05218e-38	1.71656e-36	0.714744	0.25467	0.583968	-0.357158	0.794459	1	-0.448622	0.209504	1	0	1	1	14.49	0.136704	0.980928	-13.5905	0.4079	1	-19.9185	2.73702e-29	6.29514e-27	-5.534	7.64747e-20
circ_001628	111.985	32.19	59.705	8.69	124.77	16.965	221.6	7.97	122.14	23.66	164.49	7.4	182.57	7.815	-1.79862	0.045753	0.231063	-2.78042	0.00821379	0.036578	-4.79723	2.60459e-07	4.68419e-06	-4.47433	9.40948e-05	0.00113112	1.06335	0.27579	0.612463	-0.859422	0.202883	1	0.15045	0.820272	1	0.965133	0.604208	1	1.5698	0.473941	1	0.0787206	1	1	-2.87864	0.00248563	0.0262246	-2.36801	0.00287313
circ_001637	35.39	133.635	17.685	112.5	216.93	133.05	78.715	53.42	52.74	126.565	54.09	148.54	71.88	137.045	1.91688	0.0125378	0.0856382	2.66933	0.00908858	0.0398658	-0.559259	0.763888	1	1.45742	0.0578798	0.264834	3.61663	1.07717e-05	0.000167409	-0.577741	0.882642	1	0.410229	0.702576	1	0.242044	0.606345	1	1.24443	0.095079	0.905667	-0.116202	0.833766	1	-0.705261	0.328077	0.794291	1.26291	0.111919
circ_001640	226.575	4.705	116.275	5.17	201.535	6.365	256.64	2.92	276.93	4.15	286	13.645	279.93	17.44	-5.58965	1.03079e-09	3.08709e-08	-4.49123	8.05973e-07	8.64183e-06	-6.45763	2.11415e-10	5.79379e-09	-4.38957	1.4518e-09	3.85572e-08	0.793489	0.393994	0.737256	0.109775	0.370207	1	-0.030949	0.95064	1	0.299996	1	1	0.507143	1	1	0.354028	1	1	-4.98473	1.58007e-07	3.78559e-06	-6.06027	3.5374e-15
circ_001645	149.82	67.49	117.3	82.81	190.07	83.205	274.715	42.435	135.185	32.9	148.93	69.41	232.735	41.06	-1.15048	0.100367	0.38562	-0.502326	0.133974	0.327304	-2.69461	3.2267e-06	4.95192e-05	-1.10142	0.133279	0.474156	0.696328	0.5788	0.868583	-1.023	0.139571	0.969973	0.644054	0.24952	1	0.00686523	0.924829	1	-0.367167	0.737563	1	-0.75741	0.419557	1	-1.19179	0.134593	0.511569	-2.03878	0.00589746
circ_001648	54.135	18.575	0.001	32.02	0.001	5.95	0.001	74.325	156.64	17.43	55.4	14.315	35.655	0.001	-1.5432	0.508434	0.858166	14.9667	0.116293	0.290231	16.1816	0.00073967	0.00686581	-1.95236	0.348635	0.779003	0	1	1	17.2571	1.21621e-06	0.00019442	-0.635782	0.766163	1	-2.42801	0.388801	1	-2.09227	0.0971199	0.917334	-13.8052	0.420422	1	12.5387	0.600486	0.953722	-3.16781	0.00581802
circ_001654	807.56	564.185	82.255	622.97	632.035	272.14	755.47	317.88	577.9	509.48	808.67	258.73	409.145	765.345	-0.517401	0.248893	0.631544	2.92099	1.33181e-06	1.377e-05	-1.24889	0.00198779	0.0165793	-1.6441	0.0654884	0.288433	2.94183	1.59672e-07	3.97052e-06	-0.386555	0.730725	1	-0.982939	0.00625666	0.145646	-1.19481	0.0117679	0.362189	0.680543	0.069736	0.861354	1.56466	0.0751787	1	-1.21566	0.00929695	0.0774746	-0.181794	0.426405
circ_001660	5.99	53.195	0.001	90.295	29.285	487.925	9.235	184.69	67.94	415.94	3.085	171.115	34.43	428.03	3.15066	0.0450664	0.230867	16.4624	0.00232406	0.0121058	4.32185	1.17043e-06	1.89741e-05	5.79355	1.45143e-06	2.48559e-05	14.8379	0.0461803	0.190686	2.87908	0.0379763	0.544814	3.48032	0.204978	1	2.43394	0.00262943	0.153337	1.17127	0.00265872	0.160868	1.32275	0.0029907	0.205984	4.05843	5.98394e-10	1.96615e-08	2.61404	7.65532e-08
circ_001688	1178.87	308.025	1388	578.635	805.79	226.19	1141.27	363.325	697.42	420.005	1842.26	729.875	1016.55	804.44	-1.93628	1.8132e-07	3.99588e-06	-1.26228	4.36196e-08	5.87343e-07	-1.65131	1.40108e-05	0.000187517	-1.33575	1.23328e-05	0.00017605	-0.784532	0.00193635	0.0155883	-0.710541	0.21544	1	-0.857784	0.00870047	0.184885	-1.35512	0.00732466	0.271179	0.209146	0.647627	1	0.140335	0.757576	1	-1.83287	0.000693464	0.00886093	-0.731621	0.016993
circ_001695	79.57	34.295	97.14	54.29	177.745	86.115	122.56	30.715	90.02	34.1	267.38	68.705	225.45	44.075	-1.21423	0.244568	0.631544	-0.839379	0.0665253	0.198582	-1.99647	0.0261798	0.141469	-1.9604	0.00310321	0.0250087	0.871672	0.357765	0.707485	-0.445171	0.847725	1	-0.246084	0.635143	1	0.665578	0.454516	1	0.150828	1	1	-0.640455	0.587725	1	-1.04547	0.153766	0.543242	-1.40047	0.11911
circ_001708	70.565	0.001	28.57	0.001	60.98	0.001	47.295	0.001	63.59	0.001	62.76	0.001	68.445	0.001	-16.1067	0.000153953	0.00191295	-14.8022	0.0155119	0.0625879	-15.5294	0.0114968	0.0769347	-15.9376	0.00435515	0.0325196	1.09384	0.445821	0.77225	0.427112	0.406877	1	0.1251	0.951733	1	0	1	1	0	1	1	0	1	1	-15.896	0.0027062	0.0277868	-15.9565	0.000224209
circ_001710	0.001	290.88	0.001	252.22	0.001	451.58	3.93	222.91	0.001	207.69	0.001	256.695	0.001	395.64	18.1501	4.34756e-16	2.11581e-14	17.9443	2.74264e-12	5.7745e-11	5.82579	8.33306e-10	1.9982e-08	17.9697	8.26679e-12	2.48439e-10	0	1	1	-11.9403	0.731328	1	0	1	1	0.840299	0.0279172	0.552362	-0.10203	0.78755	1	0.624133	0.143095	1	18.7846	1.43598e-19	1.65138e-17	17.6641	7.56556e-12
circ_001717	320.83	69.645	194.58	86.41	245.355	83.045	394.45	63.635	303.185	132.47	335.435	106.355	260.55	134.75	-2.20372	0.000284671	0.00325976	-1.17109	0.00180667	0.0097023	-2.63195	1.48232e-06	2.36965e-05	-1.65715	0.0017733	0.0158212	0.334507	1	1	-0.379644	0.744597	1	-0.364473	0.432129	1	-0.057305	0.96263	1	1.05777	0.136891	0.980928	0.341397	0.659882	1	-1.56291	0.0205527	0.147462	-1.19453	0.00639355
circ_001718	70.29	26.8	0.001	80.215	73.485	83.68	63.8	23.715	0.001	93.63	69.495	17.735	65.185	45.235	-1.39109	0.320116	0.715467	16.2916	9.42277e-05	0.00073232	-1.42776	0.361553	0.733403	-1.97031	0.181528	0.561247	16.1652	0.000357741	0.00384916	-15.9613	0.00160826	0.0749851	-0.0923692	0.950743	1	0.0610108	0.923832	1	1.98117	0.0812344	0.881177	1.35084	0.559731	1	0.187433	0.72885	0.990988	16.5147	1.95277e-05
circ_001722	1057.93	647.35	0.001	448.28	1160.91	1382.92	1136.54	746.725	1220.66	1170.18	1374.67	932.695	1288.16	1266.94	-0.708626	0.0578593	0.264032	18.774	4.26896e-20	2.05977e-18	-0.606	0.150735	0.483275	-0.559608	0.0958737	0.384168	20.1468	5.21251e-32	1.94427e-29	0.103013	0.213721	1	-0.0937679	0.799914	1	1.62525	4.01756e-06	0.000635922	0.648082	0.0578621	0.802926	0.441877	0.217878	1	0.252455	0.341148	0.801048	-0.0609309	0.669934
circ_001723	531.925	0.001	162.69	0.001	469.58	0.001	679.185	0.001	309.555	3.54	813.085	0.001	723.285	2.5	-19.0209	9.40226e-26	9.98349e-24	-17.3118	3.62447e-11	6.99523e-10	-19.3734	1.29522e-28	1.24233e-26	-19.633	2.08959e-31	1.83562e-29	1.52925	0.0054632	0.0371486	-1.13361	0.0135647	0.297626	-0.168842	0.665105	1	0	1	1	11.7895	0.710294	1	11.2877	1	1	-18.841	9.7987e-19	9.39042e-17	-6.4503	1.44882e-17
circ_001724	225.86	13.665	5.235	41.285	1187.79	118.18	230.595	23.85	963.005	104.665	511.445	56.945	1449.01	313.895	-4.04687	2.67008e-07	5.56903e-06	2.97936	0.185065	0.412426	-3.2733	0.000134207	0.00147117	-3.16694	8.70246e-09	1.94867e-07	7.82587	5.46975e-24	1.02011e-21	2.06218	7.05602e-09	1.57914e-06	1.50241	0.000514503	0.0295781	1.5173	0.0939837	0.948938	2.13372	0.0176154	0.44236	2.46264	1.27477e-05	0.00285263	-3.32922	3.3038e-10	1.15132e-08	-3.20176	2.63231e-18
circ_001726	60.905	31.22	216.22	28.96	25.33	7.59	25.845	39.785	35.58	31.13	40.725	49.675	28.92	54.19	-0.96409	0.360816	0.748274	-2.90037	5.35788e-08	7.05048e-07	0.622339	0.559454	0.899639	0.286605	0.828411	1	-3.09358	2.38583e-06	4.525e-05	0.461181	0.576375	1	-0.493847	0.710514	1	-1.93189	0.307429	1	-0.353919	0.789678	1	0.125507	1	1	-1.73868	0.419036	0.856935	-0.192761	0.819778
circ_001729	4.695	0.001	17.445	0.001	1.86	0.001	11.385	0.001	46.66	0.001	42.825	0.001	28.26	0.001	-12.1969	0.560171	0.890657	-14.0905	0.18327	0.410495	-13.4748	0.340336	0.723862	-15.3862	0.0332987	0.177697	-3.22944	0.320019	0.668738	2.03505	0.072755	0.740117	-0.599692	0.711581	1	0	1	1	0	1	1	0	1	1	-10.8611	1	1	-15.5099	0.00260753
circ_001737	139.605	108.875	75.44	51.535	241.175	60.51	140.695	116.73	178.655	74.915	226.15	82.15	270.015	129.54	-0.358678	0.64059	0.913813	-0.549777	0.179733	0.404138	-0.269396	1	1	-1.46095	0.0265783	0.148786	1.67668	0.0155709	0.0833678	0.344605	0.240285	1	0.25576	0.626531	1	0.231621	0.723343	1	-0.639849	0.27224	1	0.657065	0.480079	1	-1.99483	0.00294332	0.0299541	-1.25385	0.0107778
circ_001744	51.755	0.001	95.425	0.001	26.255	0.001	31.115	0.001	73.335	0.001	79.49	0.001	72.895	0.001	-15.6594	0.0021695	0.0197967	-16.5421	4.7904e-07	5.33392e-06	-14.9253	0.0488779	0.21976	-16.2785	0.0014289	0.0130544	-1.86178	0.00764535	0.0486088	1.23689	0.103525	0.877212	-0.124954	0.912922	1	0	1	1	0	1	1	0	1	1	-14.6803	0.0648739	0.337579	-16.1622	7.69831e-05
circ_001746	2093.26	1211.76	318.425	100.81	314.99	197.835	9638.88	3616.49	9939.08	8332.59	260.34	440.145	347.505	410.2	-0.788657	0.0328014	0.183514	-1.65931	5.97729e-06	5.67353e-05	-1.41427	2.1088e-06	3.28004e-05	0.757582	0.0281544	0.155325	-0.0156476	0.431578	0.760529	0.0442461	0.250868	1	0.416637	0.405043	1	0.972659	0.0959216	0.948938	1.20417	2.10049e-05	0.00472191	-0.101651	0.70539	1	-0.671008	0.306223	0.779529	-0.254346	0.25301
circ_001754	78.275	99.705	0.001	144.705	185.645	132.81	65.315	69.625	152.195	84.855	132.125	89.61	195.595	185.795	0.349114	0.563809	0.890657	17.1428	5.03254e-08	6.69848e-07	0.0921911	0.820764	1	-0.560172	0.480399	0.859898	17.5022	3.28305e-08	1.02048e-06	1.22043	0.0150365	0.322724	0.565966	0.385921	1	-0.123751	0.946745	1	0.285394	0.857025	1	1.05198	0.104932	1	-0.483183	0.624616	0.957088	-0.842849	0.131219
circ_001757	83.49	295.445	16.95	196.615	8.83	227.93	23.21	253.11	44.38	169.235	4.37	210.385	35.94	281.395	1.82321	0.00338657	0.0288724	3.53602	0.000107482	0.000829764	3.44695	5.0426e-06	7.53771e-05	5.58925	1.95025e-07	3.65113e-06	-0.9408	0.547265	0.857688	0.935163	0.47277	1	3.03989	0.162065	1	0.213217	0.558791	1	-0.580737	0.16642	1	0.419565	0.496327	1	4.69003	1.21474e-07	3.03685e-06	1.93105	0.0129571
circ_001771	1360.08	387.88	2115.16	460.87	1062.06	476.285	1551.42	450.92	1046.46	511.89	2046.84	510.895	1244.09	446.565	-1.81001	5.74651e-07	1.13761e-05	-2.19834	1.72487e-16	5.87469e-15	-1.78265	8.47717e-08	1.68228e-06	-2.0023	5.57734e-11	1.55349e-09	-0.993908	5.07329e-05	0.000692318	-0.568072	0.372615	1	-0.718307	0.0212213	0.355296	0.0474653	0.724055	1	0.182962	0.697078	1	-0.194157	0.471224	1	-1.15696	0.00622714	0.0563875	-1.03161	0.00112903
circ_001784	677.585	160.15	77.06	235.535	680.3	160.35	1279.85	214.79	687.395	219.955	883.88	229.11	991.48	223.955	-2.08098	2.31724e-07	5.0121e-06	1.61189	0.0789722	0.223533	-2.57497	3.84289e-11	1.13414e-09	-1.94781	1.23055e-08	2.65148e-07	3.14212	1.15363e-06	2.3052e-05	-0.896758	0.0518838	0.631065	0.165733	0.624057	1	-0.554717	0.365134	1	0.0342816	1	1	-0.0328316	0.876267	1	-2.08495	1.3663e-05	0.000253427	-1.64393	6.34168e-07
circ_001785	26.485	41.35	6.61	36.895	13.015	41.765	30.415	84.885	32.325	26.08	20.99	47.21	5.425	103.485	0.642712	0.614836	0.913812	2.4807	0.217607	0.463216	1.48073	0.069855	0.291316	1.16939	0.396969	0.82726	0.977453	0.902333	1	0.0878674	0.768936	1	-1.95201	0.44614	1	0.178869	0.888909	1	-1.70257	0.0536026	0.79328	1.13226	0.288001	1	1.68212	0.276756	0.747111	-0.309707	0.765449
circ_001790	8.42	24.58	73.325	6.915	0.001	17.81	54.68	31.995	8.85	3.76	0.001	6.585	15.325	0.001	1.54559	0.394013	0.780566	-3.4065	0.00180975	0.0097023	-0.773167	0.766618	1	12.685	0.449482	0.84692	-16.162	0.000112205	0.00145996	-2.62726	0.194075	1	13.9036	0.356596	1	1.36489	0.533843	1	-3.08904	0.250277	1	-12.685	0.494818	1	14.1204	0.142556	0.529763	-1.23494	0.787287
circ_001806	1214.05	617.555	655.59	914.515	976.315	525.33	1183.51	800.975	803.31	644.015	1744.07	1236.3	682.825	1032.78	-0.975182	0.011247	0.0781932	0.480213	0.965806	1	-0.563243	0.161017	0.496866	-0.496425	0.145122	0.505272	0.574553	0.452286	0.779827	-0.559043	0.417467	1	-1.35287	3.46079e-05	0.00382417	-0.799783	0.137737	1	-0.314663	0.235035	1	-0.259503	0.270887	1	-0.894123	0.113721	0.468744	-0.318863	0.235977
circ_001809	463.125	101.24	110.335	66.53	100.58	36.51	383.025	144.39	175.695	56.075	334.37	38.015	236.91	35.155	-2.19362	3.41801e-06	5.70319e-05	-0.729814	0.107032	0.272957	-1.40747	0.0121338	0.079352	-3.1368	3.20652e-08	6.4243e-07	-0.133547	0.627999	0.903253	-1.12437	0.0435234	0.586779	-0.497106	0.253767	1	-0.865713	0.483993	1	-1.36454	0.039954	0.650845	-0.112839	1	1	-1.46198	0.128025	0.497396	-1.64764	0.0016097
circ_001816	206.845	83.59	0.001	0.001	16.62	71.015	45.095	0.001	112.87	54.015	78.27	168.405	39.74	0.001	-1.30715	0.33637	0.734119	0	1	1	-15.4607	0.0743345	0.300207	1.1054	0.206349	0.60396	14.0206	0.230833	0.54958	1.32362	0.170743	1	-0.977868	0.550006	1	16.1158	0.0133134	0.375812	15.7211	0.0181037	0.44236	-17.3616	1.2943e-05	0.00285263	2.0952	0.307166	0.779529	-1.06323	0.413931
circ_001819	397.285	0.001	131.005	0.001	321.33	0.001	494.075	0.001	290.11	3.54	682.18	0.001	437.795	0.001	-18.5998	5.46738e-20	3.361e-18	-16.9993	4.05533e-09	6.09879e-08	-18.9144	8.66054e-21	4.7468e-19	-19.3798	6.80949e-30	5.5546e-28	1.29443	0.0521845	0.20781	-0.76813	0.204846	1	-0.639897	0.0868132	0.767429	0	1	1	11.7895	0.709717	1	0	1	1	-18.2937	5.81327e-14	3.51856e-12	-6.35671	1.67517e-16
circ_001820	0.001	53.8	27.57	92.94	0.001	19.295	165.545	72.61	24.57	75.4	0.001	189.975	294.575	89.745	15.7153	0.0011354	0.0114323	1.7532	0.119833	0.298422	-1.18898	0.100863	0.375708	17.5355	4.10725e-08	8.08704e-07	-14.7508	0.0222855	0.113352	-2.75225	0.0265954	0.43765	18.1683	2.07097e-10	2.28842e-07	-2.26807	0.0275555	0.552362	0.0543963	1	1	-1.08191	0.0937824	1	14.2359	0.11526	0.471704	1.61767	0.431373
circ_001821	119.915	70.84	44.11	56.75	198.705	117.005	77.625	91.265	237.805	99.985	297.455	41.52	136.145	126.985	-0.759376	0.518471	0.86883	0.363515	0.965852	1	0.23354	0.760802	1	-2.84079	0.000824122	0.0079088	2.17145	0.00886563	0.0554225	1.61519	0.00327117	0.12933	-1.12753	0.302749	1	1.04388	0.335747	1	0.13165	0.957086	1	1.61278	0.162105	1	-0.764058	0.281167	0.751957	-1.25	0.0047946
circ_001835	278.065	70.975	197.97	53.475	19.52	35.705	305.735	71.62	60.38	49.61	288.365	142.83	75.245	91.4	-1.97004	0.00816315	0.0603453	-1.88835	2.35773e-05	0.000213301	-2.09385	0.000493587	0.00487174	-1.0136	0.0422152	0.211446	-3.34226	1.38329e-06	2.71562e-05	-2.34014	0.000357984	0.0238186	-1.93823	0.00109023	0.051097	-0.582738	0.691128	1	-0.529732	0.490936	1	-0.644033	0.316659	1	0.871173	0.495524	0.904527	-0.28344	0.694205
circ_001837	54.475	0.001	137.485	55.26	0.001	0.001	0.001	52.945	76.34	36.81	0.001	42.025	142.485	36.46	-15.7333	0.00263678	0.0236905	-1.31497	0.0851164	0.236367	15.6922	0.00343817	0.0274815	15.359	0.0694753	0.299399	-17.0689	2.22219e-08	7.53525e-07	16.2202	0.000371609	0.0238186	17.1205	1.41254e-05	0.00219459	-15.7539	0.0292666	0.55958	-0.524397	0.691162	1	-0.204933	0.896195	1	0	1	1	-1.05234	0.368198
circ_001841	25.32	0.001	70.455	0.001	0.045	0.001	0.001	17.525	4.915	0.001	0.025	0.001	26.875	0.001	-14.628	0.0986081	0.382133	-16.1044	5.0672e-05	0.000437897	14.0971	0.278643	0.658283	-4.64386	1	1	-10.6126	0.000115938	0.0014912	12.263	0.591773	1	10.0701	0.188466	1	0	1	1	-14.0971	0.235826	1	0	1	1	-5.49185	1	1	-12.263	0.545187
circ_001844	659.375	549.345	117.875	1275.71	956.645	858.86	715.09	1244.85	1181.78	746.765	1194.9	1417.55	1297.67	1122.74	-0.263387	0.600521	0.906529	3.43598	3.69618e-14	9.30474e-13	0.799775	0.00948605	0.0661724	0.24651	0.309154	0.746415	3.02073	4.12486e-07	8.7089e-06	0.724765	0.013261	0.29678	0.119034	0.717595	1	-0.570811	0.140468	1	-0.737246	0.0421097	0.666637	-0.336376	0.187821	1	-0.155561	0.994911	1	-0.662235	0.0936914
circ_001846	442.3	275.91	201.955	475.395	1040.82	833.085	551.075	402.97	794.3	422.575	669.135	457.935	1260.22	522.42	-0.680827	0.159766	0.500896	1.23509	0.0542803	0.171739	-0.451576	0.417885	0.780113	-0.547154	0.185107	0.566376	2.36561	2.604e-07	5.9467e-06	0.527435	0.0124303	0.28978	0.913306	0.0156575	0.288359	0.809337	0.0127144	0.375812	0.068535	1	1	0.190067	0.71398	1	-0.321178	0.56947	0.945016	-0.910477	0.00445765
circ_001848	95.155	155.95	80.805	41.99	80.475	42.105	102.17	134.36	8.43	167.59	132.515	116.165	0.001	50.25	0.712732	0.463352	0.839062	-0.944399	0.174719	0.397494	0.395132	0.413994	0.77607	-0.18998	1	1	-0.00590389	0.852307	1	-3.5993	0.0194492	0.362727	-17.0158	1.58885e-05	0.00219459	0.00394578	0.956154	1	0.318832	0.668174	1	-1.20898	0.37894	1	-0.934549	0.5692	0.945016	4.31326	1.27213e-05
circ_001860	25.585	0.001	0.001	0.001	4.595	0.001	34.885	0.001	9.045	0.001	10.66	0.001	86.495	0.001	-14.643	0.0407709	0.21071	0	1	1	-15.0903	0.0383731	0.185577	-13.3799	0.46122	0.84692	12.1658	0.711957	0.936251	-1.94741	0.358798	1	3.02041	0.032991	0.479671	0	1	1	0	1	1	0	1	1	-12.1658	0.746741	0.990988	-13.1429	0.397551
circ_001864	15.145	10.16	15.605	25.94	17.135	12.68	38.43	12.705	0.001	48.02	51.44	26.13	33.015	0.001	-0.575941	0.944596	1	0.73317	0.935617	1	-1.59684	0.365181	0.73483	-0.977184	0.63818	0.930428	0.134938	0.946025	1	-15.2299	0.0207197	0.380088	-0.639769	0.658435	1	-1.03262	0.749078	1	1.91824	0.159235	0.994335	-14.6734	0.120597	1	-0.434391	1	1	15.5513	0.00318581
circ_001866	277.135	36.41	144.67	101.015	192.99	74.32	316.63	57.53	269.02	82.215	494.625	157.24	300.92	67.855	-2.92818	0.00122119	0.0120877	-0.518196	0.0767398	0.220508	-2.46041	6.68087e-06	9.49343e-05	-1.65337	0.000187273	0.00203682	0.41576	0.88483	1	-0.235085	0.939632	1	-0.716955	0.0917271	0.773729	-0.442747	0.642881	1	0.515087	0.586578	1	-1.21244	0.0691744	1	-1.3767	0.039167	0.230985	-1.71024	7.79149e-05
circ_001879	1.89	0.001	1.745	0.001	35.085	0.001	30.94	2.65	38.33	0.001	15.27	0.001	247.88	0.001	-10.8842	1	1	-10.769	1	1	-3.54541	0.109869	0.393953	-13.8984	0.196629	0.588722	4.32956	0.114585	0.359161	0.309001	0.60058	1	4.02087	8.07348e-06	0.00178424	0	1	1	-11.3718	1	1	0	1	1	-15.0986	0.0770999	0.375699	-15.2262	0.00772821
circ_001882	89.9	9.95	54.45	13.095	29.61	26.645	91.27	0.001	40.185	0.001	82.68	4.935	64.835	15.405	-3.17555	0.00330672	0.0283989	-2.05592	0.0582544	0.179889	-16.4779	0.000101161	0.00115283	-4.06642	0.0113191	0.0718134	-0.878848	0.290365	0.630178	-1.18348	0.343576	1	-0.350766	0.740498	1	1.02485	0.546134	1	0	1	1	1.64228	0.637417	1	-0.15222	1	1	-15.2944	0.006751
circ_001886	452.98	308.08	176.82	295.285	450.25	246.15	520.15	356.57	364.27	294.65	811.45	436.65	544.005	228.965	-0.556142	0.214401	0.593412	0.739827	0.517329	0.763143	-0.544742	0.372651	0.740206	-0.894025	0.0252067	0.143214	1.34844	0.0128118	0.0727736	-0.51392	0.488139	1	-0.576882	0.126383	0.906837	-0.26257	0.756691	1	-0.275183	0.443219	1	-0.93135	0.0182341	0.54308	-0.871189	0.0821625	0.387241	-0.306006	0.26492
circ_001892	51.85	0.001	11.265	0.001	44.5	0.001	43.32	0.001	35.915	0.001	84.525	0.001	69.35	0.001	-15.6621	0.00214487	0.0197967	-13.4596	0.176696	0.398857	-15.4027	0.0132782	0.0853808	-16.3671	0.00195244	0.0168916	1.98196	0.195791	0.500207	-0.270447	1	1	-0.285482	0.798933	1	0	1	1	0	1	1	0	1	1	-15.4415	0.0147692	0.112481	-15.1323	0.00933988
circ_001896	58.91	68.68	17.265	50.89	213.79	186.02	19.65	62.51	96.345	113.515	38.375	69.695	180.195	77.52	0.221377	0.741046	0.964662	1.55953	0.320267	0.591497	1.66956	0.0895567	0.34707	0.860888	0.374859	0.807714	3.63027	1.85305e-05	0.000280212	2.29368	0.00535215	0.171116	2.23132	0.00395103	0.109147	1.87	0.00812708	0.271179	0.860724	0.342192	1	0.153513	0.953957	1	-0.200737	0.829604	1	0.236601	0.883283
circ_001897	318.88	217.635	217.04	230.435	504.615	465.84	316.71	150.39	370.905	244.645	598.6	324.165	848.84	298.26	-0.551103	0.274692	0.662894	0.0863989	0.370941	0.644969	-1.07445	0.0370685	0.180788	-0.884864	0.0127438	0.0804058	1.21722	0.0287155	0.13278	0.227887	0.154882	1	0.5039	0.143181	0.963619	1.01547	0.00778793	0.271179	0.701981	0.147763	0.994335	-0.120158	0.727766	1	-0.115349	1	1	-0.60036	0.0530662
circ_001903	256.525	0.001	30.015	0.001	81.31	0.001	88.875	0.001	80.035	0.001	121.725	0.001	95.29	0.001	-17.9687	4.1524e-14	1.67241e-12	-14.8734	0.0367924	0.125772	-16.4395	8.2255e-05	0.000946755	-16.8933	4.08334e-05	0.00054223	1.43775	0.422998	0.752699	-0.151147	0.92646	1	-0.353229	0.677175	1	0	1	1	0	1	1	0	1	1	-16.3111	0.00173789	0.0194036	-16.2883	4.77265e-05
circ_001916	14.375	0.001	44.62	0.001	24.165	0.001	41.505	0.001	23.55	0.001	28.6	0.001	77.275	0.001	-13.8113	0.150091	0.481609	-15.4454	0.00233126	0.0121058	-15.341	0.0142495	0.0891365	-14.8037	0.169312	0.541607	-0.884772	0.442726	0.76927	-0.817558	0.642818	1	1.43399	0.305156	1	0	1	1	0	1	1	0	1	1	-14.5606	0.208802	0.646361	-14.5234	0.0348514
circ_001918	154.34	83.53	0.001	26.385	104.48	159.48	20.93	138.55	104.46	125.84	71.07	92.1	65.785	190.455	-0.885746	0.206366	0.588275	14.6874	0.138829	0.334229	2.72676	0.000511035	0.00494287	0.37396	0.610283	0.920435	16.6729	9.52442e-06	0.000154461	2.31931	0.00456269	0.161555	-0.111482	0.967964	1	2.59559	0.0136363	0.375812	-0.138816	0.758891	1	1.04818	0.307864	1	0.610149	0.271268	0.736224	0.26864	0.785248
circ_001924	486.905	102.035	158.795	137.465	578.55	113.01	673.79	103.43	467.025	219.225	540.885	153.625	703.62	193.53	-2.25458	4.6534e-07	9.37099e-06	-0.208101	0.266581	0.525895	-2.70364	4.80477e-10	1.22895e-08	-1.81591	1.92898e-06	3.10267e-05	1.86528	0.00130847	0.0111769	-0.528799	0.524801	1	0.379475	0.276231	1	-0.282614	0.739176	1	1.08376	0.0293731	0.541236	0.333144	0.628987	1	-2.35599	1.41141e-05	0.000257638	-1.09109	0.000906452
circ_001930	62.33	30.355	5.33	49.795	82.455	72.615	0.001	29.03	0.001	71.205	58.625	141.915	24.5	212.07	-1.03799	0.491286	0.850756	3.22379	0.0940399	0.250341	14.8253	0.0428821	0.20195	1.27544	0.272006	0.70777	3.9514	0.0158501	0.0844583	0	1	1	-1.25873	0.559456	1	0.544267	0.510954	1	1.29443	0.221381	1	0.579513	0.425464	1	-0.183339	1	1	16.1197	0.000185106
circ_001939	93.445	32.57	6.975	28.58	92.705	43.785	100.985	39.785	95.08	25.82	155.91	25.94	147.325	46.06	-1.52057	0.121845	0.431256	2.03474	0.39032	0.661772	-1.34384	0.159893	0.496056	-2.58746	0.00386294	0.0296072	3.73238	0.00484459	0.034095	-0.0869272	0.791812	1	-0.0817112	0.910449	1	0.615431	0.590905	1	-0.623736	0.57107	1	0.828336	0.564755	1	-1.08221	0.251399	0.713848	-1.88065	0.0290027
circ_001942	5848.54	5569.83	739.405	6434.32	6132.43	5800.92	8073.02	6797.87	5435.52	7606.04	7724.44	6044.2	8699.83	7146.86	-0.0704432	0.960082	1	3.12135	7.18121e-17	2.5987e-15	-0.248026	0.828087	1	-0.353878	0.229196	0.643101	3.05202	2.50791e-13	1.55908e-11	-0.570689	0.399418	1	0.171556	0.559998	1	-0.149506	0.816644	1	0.162063	0.728469	1	0.241757	0.467804	1	-0.080176	0.90138	1	0.484726	0.241751
circ_001956	454.475	324.47	665.985	236.34	311.805	300.64	525.16	346.785	368.305	313.66	464.8	279.25	489.87	344.43	-0.486116	0.319204	0.715467	-1.49463	9.35047e-08	1.1519e-06	-0.598716	0.229411	0.596053	-0.735053	0.0770087	0.322139	-1.09485	0.000791275	0.00733873	-0.511856	0.488316	1	0.0757889	0.865695	1	0.347173	0.348928	1	-0.14484	0.570398	1	0.302654	0.6065	1	-0.0526071	0.938491	1	-0.231699	0.354741
circ_001960	0.001	90.295	0.001	149.61	0.001	131.51	0.001	143.07	0.001	201.345	0.001	126.625	0.001	137.67	16.4624	3.31283e-05	0.000477702	17.1908	4.05704e-08	5.52712e-07	17.1264	3.15275e-05	0.000403202	16.9502	2.4503e-05	0.000337137	0	1	1	0	1	1	0	1	1	-0.186034	0.883661	1	0.492948	0.51142	1	0.120652	0.962709	1	17.0048	5.24835e-07	1.18345e-05	17.6193	1.82074e-11
circ_001961	105.345	534.18	6.31	745.455	70.79	854.115	42.625	906.27	26.97	795.99	120.39	1089.26	29.43	1373.22	2.3422	3.33743e-08	8.12107e-07	6.88434	4.64333e-27	4.13613e-25	4.41017	2.32163e-19	1.02777e-17	3.17755	2.53828e-17	9.99555e-16	3.48783	0.0233428	0.118193	-0.660344	0.682853	1	-2.03236	0.106141	0.82592	0.196309	0.399844	1	-0.187191	0.435786	1	0.334221	0.332408	1	3.59281	2.56366e-14	1.73424e-12	4.88332	1.38262e-23
circ_001964	138.31	163.865	95.9	171.635	74.17	104.455	355.205	427.43	311.1	486.9	398.96	982.215	169.78	681.005	0.244602	0.549904	0.890657	0.839741	0.469598	0.72313	0.267036	0.461224	0.83339	1.29979	1.76749e-05	0.000246156	-0.370695	0.433116	0.760842	-0.191273	0.894998	1	-1.23258	0.0191962	0.331435	-0.716462	0.366531	1	0.187937	0.741367	1	-0.528373	0.068574	1	0.493974	0.493798	0.90281	0.646247	0.181939
circ_001971	195.975	80.385	28.8	78.18	621.06	173.765	94.32	34.475	530.6	145.12	92.595	89.55	338.03	171.54	-1.28567	0.0342823	0.188713	1.44073	0.253982	0.520211	-1.45201	0.162064	0.498758	-0.0482409	0.961246	1	4.43059	8.97586e-16	8.36999e-14	2.49199	3.18851e-08	5.94657e-06	1.86815	0.000318354	0.0219863	1.15227	0.0557911	0.802812	2.07362	0.00532267	0.206299	0.93778	0.213903	1	-1.8376	0.000205119	0.00306346	-1.87038	0.000109719
circ_001973	48.425	40.365	261.93	131.515	87.36	155.585	72.745	45.09	91.705	99.355	92.885	122.36	126.08	165.81	-0.262647	0.927144	1	-0.993954	0.00218931	0.0114716	-0.690041	0.620575	0.930507	0.397614	0.52326	0.887909	-1.58414	0.000287235	0.00319577	0.334152	0.375958	1	0.440822	0.562131	1	0.242476	0.600768	1	1.13979	0.157808	0.994335	0.438399	0.529627	1	0.832658	0.114667	0.470954	0.115592	1
circ_001983	0.001	281.48	0.001	195.76	0.001	286.485	0.001	496.115	2.14	221.025	0.001	280.13	0.001	240.855	18.1027	1.70287e-15	7.64982e-14	17.5787	4.81108e-10	8.44126e-09	18.9203	1.44598e-20	7.5651e-19	18.0957	3.69464e-13	1.14035e-11	0	1	1	11.0634	1	1	0	1	1	0.549374	0.198069	1	-1.16647	0.00336355	0.18003	-0.217932	0.518667	1	18.1281	1.15806e-13	6.34178e-12	6.69045	1.35951e-11
circ_001990	330.685	253.355	624.945	301.2	278.55	339.935	345.505	352.735	293.395	313.045	489.8	433.48	388.19	428.95	-0.384297	0.519498	0.869303	-1.05301	4.00039e-05	0.000350943	0.0298781	0.655874	0.953398	-0.176227	0.747578	0.978441	-1.16579	0.0013771	0.011674	-0.235862	0.962268	1	-0.33543	0.398019	1	0.174537	0.529235	1	-0.172215	0.594279	1	-0.0151559	0.824365	1	0.287323	0.437281	0.856935	0.0935258	0.983067
circ_002002	0.001	23.525	0.001	22.985	0.001	65.07	0.001	0.001	0.001	0.001	0.001	18.85	0.001	0.001	14.5219	0.120858	0.429065	14.4884	0.0772335	0.220831	0	1	1	14.2023	0.275057	0.710742	0	1	1	0	1	1	0	1	1	1.5013	0.148881	1	0	1	1	-14.2023	0.323504	1	15.9897	0.00124333	0.0145901	0	1
circ_002011	9445.16	3898.88	6202.94	6099.15	16529.7	9921.67	14516.2	8340.61	17552.5	12345.7	17239	11683.6	23744.5	11536	-1.27652	0.00686162	0.0527261	-0.024344	0.0821331	0.229711	-0.799444	0.0149256	0.0904174	-0.56119	0.0425082	0.211984	1.41403	0.000621956	0.006214	0.274008	0.0464628	0.590357	0.461914	0.071388	0.737231	0.701976	0.0046291	0.202682	0.56578	0.0572194	0.802926	-0.018343	0.774513	1	-0.736401	0.0848334	0.391801	-0.507672	0.0679202
circ_002017	4608.29	6469.16	628.595	3108.07	2748.68	4102.64	2793.51	5685.99	1252.13	2812.01	1199.13	841.265	1908.69	643.32	0.489347	0.0622393	0.279598	2.30582	2.58161e-07	3.0197e-06	1.02533	0.000313151	0.00324718	-0.511356	0.132255	0.471985	2.12854	1.39491e-07	3.54751e-06	-1.1577	0.00461998	0.161555	0.670599	0.148545	0.980372	0.400531	0.136333	1	-1.01581	0.00105551	0.0790931	-0.387024	0.138643	1	0.577811	0.0475787	0.268213	1.16722	0.001205
circ_002024	22.845	257.015	20.175	76.995	19.9	68.825	45.955	397.78	50.87	379.965	53.345	297.025	30.36	327.225	3.4919	9.66438e-08	2.17077e-06	1.9322	0.0984291	0.258097	3.11368	2.45235e-11	7.42805e-10	2.47716	3.00174e-05	0.000403292	-0.0198002	0.887124	1	0.146593	0.67967	1	-0.813181	0.568663	1	-0.161832	1	1	-0.0661042	0.695786	1	0.139699	0.883397	1	1.79016	0.167073	0.567179	2.90098	7.75591e-08
circ_002042	293.33	385.815	168.585	501.18	349.105	662.75	352.275	471.09	574.52	703.05	424.92	628.11	429.85	1025.91	0.395385	0.232781	0.619335	1.57185	0.00368345	0.0180739	0.419301	0.176764	0.517697	0.563826	0.051151	0.237865	1.05018	0.106974	0.342606	0.705655	0.0165744	0.331192	0.0166421	0.98096	1	0.403136	0.252116	1	0.577625	0.157792	0.994335	0.707822	0.0413759	0.860307	0.924804	0.0339881	0.21063	0.29127	0.667276
circ_002044	159.12	491.925	67.415	470.525	146.03	563.37	143.11	604.585	127.865	479.945	175.11	561.83	195.425	523.64	1.62832	7.71915e-05	0.00108626	2.80313	1.15474e-06	1.21562e-05	2.07882	2.48381e-07	4.61107e-06	1.68187	4.83764e-05	0.000620713	1.11512	0.226794	0.541114	-0.162503	0.889004	1	0.158354	0.814338	1	0.259811	0.392324	1	-0.333076	0.282594	1	-0.101558	0.674082	1	1.94782	2.41911e-06	5.05814e-05	1.90825	5.19954e-05
circ_002045	6.37	222.08	7.28	427.065	27.395	372.455	15.06	321.26	18.315	185.715	7.335	708.535	27.81	351.295	5.12364	4.71682e-09	1.2521e-07	5.87437	3.17177e-15	9.41773e-14	4.41495	3.62818e-13	1.22824e-11	6.5939	2.21755e-29	1.68829e-27	1.9119	0.453616	0.780918	0.282304	0.803621	1	1.92273	0.335414	1	-0.19739	0.788288	1	-0.790651	0.0274326	0.522615	-1.01216	0.00224261	0.164757	3.76508	5.0282e-10	1.70071e-08	3.34199	0.000541066
circ_002049	981.885	1521.2	232.075	1513.08	842.99	1570.47	671.085	1514.51	700.64	1850.38	506.945	1396.38	699.43	1883.03	0.631589	0.0267574	0.154716	2.70483	5.4147e-10	9.35854e-09	1.17428	5.23024e-06	7.71795e-05	1.46179	1.59881e-06	2.64614e-05	1.86092	0.000288447	0.00319577	0.0621778	0.289551	1	0.46435	0.19902	1	0.0537127	0.625963	1	0.288979	0.395625	1	0.431366	0.246369	1	0.897614	0.0125597	0.0982563	1.40108	5.55941e-05
circ_002051	385.995	49.825	1.75	44.435	150.985	42.225	157.93	21.54	80.6	18.795	92.19	43.64	101.31	12.925	-2.95364	2.79521e-08	6.9464e-07	4.66627	0.0221451	0.0838042	-2.8742	0.000973506	0.00855347	-1.07896	0.303327	0.736177	6.43091	9.59504e-07	1.9883e-05	-0.970434	0.260416	1	0.136094	0.883184	1	-0.0735991	1	1	-0.196669	0.908257	1	-1.75549	0.236639	1	-1.83824	0.019943	0.145155	-2.10043	0.0386888
circ_002052	5.9	28.27	4.24	16.99	38.635	29.495	8.91	7.525	4.575	23.575	7.11	42.725	0.001	136.05	2.26049	0.336263	0.734119	2.00255	0.430769	0.685544	-0.243734	1	1	2.58716	0.185982	0.566376	3.18777	0.131256	0.389589	-0.961654	1	1	-12.7956	0.627661	1	0.795785	0.639343	1	1.64749	0.474432	1	1.67098	0.0524272	0.972751	-0.389438	0.844441	1	2.36541	0.299579
circ_002053	393.455	530.9	61.325	455.815	398.935	379.75	462.9	527.84	283.615	513.335	479.225	621.32	437.895	520.03	0.432241	0.165878	0.509793	2.8939	3.98231e-07	4.52109e-06	0.1894	0.27899	0.658283	0.374633	0.178023	0.555071	2.70161	8.03179e-06	0.00013217	-0.706767	0.253328	1	-0.130118	0.737665	1	-0.263398	0.645397	1	-0.0402001	0.751383	1	-0.256742	0.362357	1	-0.0711037	0.98786	1	0.855967	0.0603316
circ_002078	96.095	100.69	860.94	134.16	105.715	159.305	215.23	92.84	121.52	93.525	207.105	206.64	190.025	132.56	0.0673871	0.82894	1	-2.68196	5.001e-16	1.56518e-14	-1.21306	0.0333583	0.166937	-0.00324284	1	1	-3.02573	2.25174e-12	1.25985e-10	-0.824685	0.294922	1	-0.124173	0.837728	1	0.247837	0.57198	1	0.0106055	1	1	-0.640474	0.234197	1	0.591611	0.28182	0.751957	-0.37777	0.412199
circ_002079	0.001	175.79	4.865	171.665	1.625	283.98	0.001	185.04	0.77	252.135	0.001	330.405	0.001	400.64	17.4235	4.77896e-10	1.64171e-08	5.14101	1.24833e-06	1.30232e-05	17.4975	7.97151e-10	1.95217e-08	18.3339	4.93162e-16	1.81675e-14	-1.582	0.832724	1	9.58871	1	1	0	1	1	0.726193	0.0973913	0.952115	0.446359	0.342406	1	0.278071	0.567194	1	7.44921	5.51749e-12	2.26611e-10	8.35512	4.83409e-15
circ_002085	113.35	46.77	6.44	41.65	130.23	92.09	47.335	117.07	110.135	123.595	36.905	25.31	119.25	32.74	-1.27713	0.248093	0.631544	2.69318	0.227611	0.476624	1.30639	0.0527257	0.233661	-0.544109	0.897896	1	4.33786	0.000610748	0.006157	1.21829	0.116717	0.913327	1.6921	0.178122	1	1.14473	0.24439	1	0.078249	1	1	0.371347	0.955689	1	-0.499945	0.516999	0.908127	0.166347	0.898878
circ_002089	15.425	0.001	3.49	8.35	65.865	0.001	23.445	0.001	45.99	2.305	26.695	0.001	25.41	0.001	-13.913	0.110966	0.411228	1.25855	0.885402	1	-14.517	0.0815921	0.32052	-14.7043	0.0659203	0.288433	4.23821	0.00715657	0.0460241	0.97204	0.359511	1	-0.0711732	1	1	-13.0276	0.568297	1	11.1706	1	1	0	1	1	-16.0072	0.00118895	0.0141331	-4.31848	0.0105694
circ_002099	32941	234732	26654.2	205830	30718.2	189648	28681.2	167686	31506.4	185223	23663.9	215529	21468.5	181323	2.83306	9.49555e-19	5.28134e-17	2.94901	2.45806e-20	1.29384e-18	2.54759	1.11986e-13	3.90595e-12	3.18712	5.31507e-28	3.57048e-26	0.204728	0.777249	0.976837	0.135541	0.310067	1	-0.140469	0.606535	1	-0.118128	0.966407	1	0.143497	0.716959	1	-0.249321	0.24353	1	2.62616	2.8288e-11	1.04939e-09	2.55554	1.67807e-13
circ_002105	0.001	0.03	80.915	0.001	0.001	0.001	11.725	49.245	2.375	0.565	0.035	12.51	0.001	0.08	4.90689	1	1	-16.3041	2.85968e-06	2.80637e-05	2.07039	0.19535	0.549673	8.48151	0.345404	0.779003	-16.3041	2.16528e-05	0.000318808	-2.30359	0.571384	1	-5.12928	1	1	0	1	1	-6.44558	0.00564417	0.211468	-7.28887	0.398498	1	0	1	1	-2.0716	1
circ_002121	205.055	229.22	304.685	151.355	137.085	179.74	163.39	188.35	141.435	201.475	251.995	126.76	216.465	221.255	0.160722	0.607675	0.912294	-1.00938	0.000598085	0.00376404	0.205096	0.466138	0.834747	-0.991296	0.0497477	0.233165	-1.15225	0.00169435	0.0140366	-0.208181	0.913847	1	-0.219261	0.692234	1	0.247975	0.535612	1	0.0971848	0.937063	1	0.80361	0.156145	1	0.390841	0.397079	0.836338	0.510462	0.346416
circ_002139	0.001	68.81	0.001	45.7	1.64	112.525	0.001	40.275	8.14	38.35	5.255	0.001	2.77	110.27	16.0703	0.00873534	0.0633719	15.4799	0.0345199	0.119326	15.2976	0.0632761	0.265806	-12.3595	0.63461	0.930428	10.6795	1	1	12.9908	0.442	1	-0.923805	1	1	1.29998	0.240941	1	-0.070658	1	1	16.7507	0.000387829	0.0427388	6.10041	0.00029925	0.0041968	2.23613	0.2112
circ_002144	284.12	319.405	42.385	265.295	326.91	264.235	409.49	376.725	259.79	474.73	444.8	404.01	462.75	487.205	0.168887	0.551651	0.890657	2.64597	7.97505e-05	0.00065036	-0.120316	0.883466	1	-0.138766	0.816419	1	2.94727	6.22023e-06	0.000103887	-0.656482	0.46898	1	0.0570762	0.894129	1	-0.00577591	0.862148	1	0.333595	0.522687	1	0.270138	0.532486	1	-0.307072	0.680593	0.990988	0.869761	0.140109
circ_002145	39.87	22.37	7.455	11.73	125.71	109.995	51.01	10.86	156.87	123.055	6.88	19.7	37.045	38.49	-0.833738	0.570357	0.890657	0.653923	1	1	-2.23176	0.140089	0.459381	1.51772	0.532859	0.893188	4.07575	0.000222322	0.00260802	1.62072	0.00362608	0.135253	2.4288	0.230872	1	3.22916	0.0023255	0.151568	3.50221	0.000234894	0.0255303	0.966288	0.584533	1	-0.192661	0.911364	1	-0.350266	0.338483
circ_002148	125.065	38.675	123.455	54.17	60.27	28.265	177.61	39.81	191.815	27.665	179.63	61.64	237.795	92.375	-1.6932	0.0501488	0.243171	-1.18842	0.029199	0.104682	-2.15751	0.00222993	0.0183332	-1.54309	0.0302458	0.165008	-1.03447	0.202618	0.510652	0.111003	0.374018	1	0.40469	0.447	1	-0.938477	0.539688	1	-0.525069	0.655796	1	0.583636	0.605563	1	-1.09242	0.625852	0.957088	-2.79358	4.78968e-06
circ_002149	0.001	352.925	0.001	351.605	9.76	557.72	1.875	413.725	0.001	384	14.3	479.62	0.001	552.03	18.429	2.50559e-19	1.46327e-17	18.4236	6.0807e-17	2.34715e-15	7.78564	1.29287e-21	7.44047e-20	5.0678	6.33702e-14	2.06768e-12	13.2527	0.367189	0.709404	-10.8727	1	1	-13.8037	0.408982	1	0.665585	0.0480993	0.732897	-0.107566	0.617767	1	0.202855	0.788595	1	5.83652	1.01214e-17	7.27476e-16	18.5507	1.4734e-23
circ_002159	0.001	174.405	0.001	186.125	0.001	182.89	7.49	252.035	0.001	493.24	0.001	218.045	0.001	319.105	17.4121	6.41474e-10	2.08123e-08	17.5059	9.86627e-10	1.63216e-08	5.07251	3.63831e-10	9.51749e-09	17.7343	9.57638e-09	2.10312e-07	0	1	1	-12.8708	0.503562	1	0	1	1	-0.0252957	0.950248	1	0.968666	0.0107481	0.317917	0.549405	0.256782	1	17.4806	2.05063e-09	6.55062e-08	18.9119	1.20996e-26
circ_002164	318.175	628.035	238.68	783.565	223.28	642.62	258.905	867.53	209.335	910.565	423.34	838.955	275.435	882.595	0.981024	0.00373464	0.0313817	1.71498	0.00104142	0.0060907	1.74449	1.49717e-07	2.87206e-06	0.986777	0.00652341	0.0457039	-0.0962237	0.418034	0.752699	-0.306609	1	1	-0.620105	0.166749	1	-0.286087	0.572699	1	0.0698484	0.971986	1	0.0731581	0.953499	1	1.52511	0.000250721	0.00364973	2.12095	5.33237e-09
circ_002168	152.09	20.09	30.3	71.32	559.955	184.995	106	34.445	347.87	71.635	93.805	30.875	355.595	45.54	-2.92038	0.000639181	0.00678694	1.23499	0.372479	0.645704	-1.6217	0.134565	0.451908	-1.60323	0.149148	0.509962	4.20792	3.02696e-14	2.25811e-12	1.71448	0.00116817	0.0594172	1.9225	0.00172291	0.0626277	1.37511	0.0250665	0.528683	1.05637	0.328149	1	0.560695	0.695709	1	-1.59782	0.00166934	0.018821	-2.27981	7.59904e-07
circ_002169	64.59	72.885	215.8	151.81	49.465	36.19	69.61	78.385	45.315	91.295	66.055	142.94	51.94	80.295	0.174311	0.753846	0.97189	-0.507428	0.0672859	0.199787	0.171283	0.642839	0.94778	1.11367	0.18184	0.561247	-2.12521	0.000176666	0.0021724	-0.619306	0.826291	1	-0.346822	0.779825	1	-2.0686	0.0192163	0.483901	0.219958	0.919486	1	-0.832028	0.192905	1	-0.450817	0.858907	1	1.01055	0.280908
circ_002184	0.001	65.4	0.001	17.49	8.43	25.105	5.115	146.055	3.57	71.44	2.23	18.9	0.001	21.12	15.997	0.000271803	0.00317466	14.0942	0.272013	0.532079	4.83563	1.00624e-05	0.000137878	3.08327	0.389504	0.81976	13.0413	0.306503	0.654016	-0.51881	1	1	-11.1228	1	1	0.521444	0.848872	1	-1.03171	0.0792438	0.881177	0.160224	1	1	1.57437	0.569098	0.945016	4.32274	0.00244148
circ_002185	4.92	47.48	0.001	97.905	0.001	87.3	0.001	182.16	0.001	417.76	14.3	142.695	7.515	197.095	3.27059	0.0224142	0.132985	16.5791	0.000280241	0.00188674	17.4748	1.00557e-09	2.36206e-08	3.31885	0.00310967	0.0250087	0	1	1	0	1	1	-0.92817	0.826365	1	-0.165401	0.972169	1	1.19747	0.00209218	0.146975	0.465956	0.483439	1	16.4137	9.01458e-05	0.00143983	18.6723	2.23533e-25
circ_002192	0.001	16.77	0.001	22.395	0.001	28.515	0.001	39.82	0.001	67.445	0.001	61.88	0.001	71.595	14.0336	0.112829	0.415723	14.4509	0.0788153	0.223533	15.2812	0.0231013	0.129076	15.9172	0.00416317	0.0314857	0	1	1	0	1	1	0	1	1	0.348544	0.85245	1	0.760218	0.520852	1	0.210386	0.901416	1	14.7994	0.044992	0.257417	16.0414	0.000284656
circ_002196	0.001	94.24	1.745	168.88	0.001	223.845	0.001	132.62	3.255	215.375	0.001	170.765	2.485	165.495	16.5241	7.31327e-06	0.000113892	6.59663	3.08817e-07	3.54069e-06	17.0169	6.91234e-07	1.13659e-05	17.3817	2.11051e-07	3.88742e-06	-10.769	1	1	11.6684	0.732628	1	11.279	1	1	0.406502	0.36488	1	0.699552	0.154813	0.994335	-0.0452247	0.838946	1	17.7721	2.96341e-12	1.31074e-10	6.04805	2.18509e-10
circ_002203	1563.24	914.405	647.1	1116.41	1980.06	1023.9	1926.32	867.27	1614.53	1136.23	1570.32	989.315	2076.29	1245.69	-0.773634	0.0309594	0.176393	0.786813	0.352184	0.629014	-1.15129	0.00161083	0.0135333	-0.666552	0.0323326	0.173351	1.61348	0.000347456	0.0038118	-0.254734	0.862519	1	0.402954	0.188441	1	-0.124792	0.898051	1	0.389708	0.256096	1	0.332443	0.360168	1	-0.951462	0.0189749	0.138988	-0.506849	0.063226
circ_002207	113.735	144.1	0.001	133.07	153.765	128.725	199.12	89.095	47.215	145.885	34.885	170.3	145.6	188.415	0.341394	0.559241	0.890657	17.0218	2.7195e-07	3.14918e-06	-1.16022	0.0709805	0.292826	2.2874	0.0337292	0.178328	17.2304	9.99005e-08	2.66164e-06	-2.07632	0.0689588	0.734903	2.06133	0.0968544	0.780202	-0.0478931	1	1	0.711415	0.280918	1	0.145835	0.887468	1	-0.256435	0.816668	1	1.62751	0.161496
circ_002211	119.15	82.495	0.001	109.365	326.8	61.735	241.555	223.5	117.39	147.82	185.805	63.005	107.07	124.795	-0.5304	0.695839	0.946985	16.7388	1.03346e-05	9.57397e-05	-0.112077	0.80749	1	-1.56025	0.123382	0.448732	18.318	4.08949e-12	2.08006e-10	-1.04104	0.238253	1	-0.795235	0.267596	1	-0.824991	0.401812	1	-0.596433	0.148523	0.994335	0.986022	0.403591	1	-2.40425	0.00156815	0.0178552	0.332532	0.65966
circ_002217	0.001	67.845	39.37	72.925	33.28	72.675	101.71	0.001	100.865	41.065	2.3	57.64	210.57	88.045	16.05	0.000270867	0.00317466	0.889317	0.695189	0.895602	-16.6341	0.00855802	0.0608042	4.64736	0.0211168	0.123053	-0.242441	0.829719	1	-0.0120359	0.703748	1	6.51652	2.53801e-07	0.000140225	-0.00495431	0.906671	1	15.3256	0.00920362	0.28518	0.611171	0.552207	1	1.1268	0.427853	0.856935	-1.29644	0.0610772
circ_002218	1941.31	380.705	13	666.735	1585.07	672.935	1919.4	125.935	783.28	385.865	596.145	444.075	78.89	203.895	-2.35028	0.000580534	0.00622077	5.68053	1.54317e-17	6.16203e-16	-3.92991	1.95637e-10	5.49215e-09	-0.42486	0.44679	0.84692	6.92989	6.42177e-28	1.79649e-25	-1.29306	0.0128988	0.294565	-2.91775	0.00175697	0.0626277	0.0133537	0.790919	1	1.61542	0.00851886	0.273577	-1.12298	0.115115	1	-1.23601	0.0415108	0.242322	-1.02143	0.00564445
circ_002219	117.565	32.095	95.225	35.835	93.485	40.745	88.615	42.88	79.28	62.665	95.565	43.685	125.885	15.195	-1.87304	0.0652985	0.288897	-1.40997	0.0118942	0.0498052	-1.04725	0.407105	0.773392	-1.12934	0.281537	0.712908	-0.0266055	0.609292	0.893576	-0.160594	0.963081	1	0.397552	0.60888	1	0.185254	0.8227	1	0.547355	0.687841	1	-1.52354	0.293954	1	-1.19811	0.257473	0.720424	-0.339297	0.575072
circ_002220	10.59	594.63	14.97	653.89	19.75	466.84	22.775	517.07	11.9	636.255	28.025	806.62	12.65	826.855	5.81122	1.22221e-23	1.01967e-21	5.4489	1.33489e-20	7.36098e-19	4.50484	8.14807e-18	3.47349e-16	4.8471	7.59344e-25	3.94169e-23	0.399778	1	1	-0.936489	0.822441	1	-1.14758	0.566659	1	-0.48612	0.299395	1	0.299245	0.471332	1	0.0357452	0.955722	1	4.563	9.93785e-14	5.71426e-12	5.74057	4.64002e-26
circ_002221	373.08	98.905	166.875	102.135	205.855	152.055	233.705	136.465	308.9	127.855	205.51	92.035	157.215	115.55	-1.91537	0.001611	0.0154346	-0.70829	0.0253035	0.0930207	-0.776158	0.202966	0.554903	-1.15895	0.0986957	0.391356	0.302861	1	1	0.402451	0.111095	0.907411	-0.38647	0.564163	1	0.574116	0.277594	1	-0.0940224	0.825659	1	0.328263	0.827939	1	-0.437035	0.563474	0.945016	-1.27263	0.00415366
circ_002230	0.001	50.525	0.001	22.395	0.001	45.72	0.001	42.49	0.001	68.225	0.001	18.8	0.001	116.095	15.6247	0.00161218	0.0154346	14.4509	0.0780245	0.222464	15.3748	0.0292029	0.153482	14.1984	0.187687	0.570049	0	1	1	0	1	1	0	1	1	1.02965	0.390067	1	0.683177	0.617856	1	2.6265	0.0217351	0.598803	15.4805	0.0110415	0.0887952	16.058	0.000302113
circ_002231	3936.61	2628.99	939.125	3111.77	9147.84	7709.88	4114.23	3524.65	7041.6	3753.15	6052.85	4282.23	11614	3796.41	-0.582441	0.143232	0.470068	1.72835	7.79375e-05	0.000640082	-0.223144	0.840979	1	-0.499254	0.155837	0.523428	3.28404	4.387e-18	4.90906e-16	0.775278	0.000352527	0.0238186	0.94018	0.0100269	0.201449	1.30897	3.62531e-06	0.000635922	0.0906219	0.905478	1	-0.173726	0.4327	1	-0.246724	0.698475	0.990988	-0.9078	0.00140659
circ_002238	199.615	152.74	47.82	277.745	140.01	85.175	98.625	250.01	99.455	95.33	263.19	147.95	150.755	470.725	-0.386142	0.586894	0.904344	2.53807	0.00122579	0.00699245	1.34196	0.0574639	0.247827	-0.830995	0.298316	0.729501	1.54984	0.211528	0.52022	0.0120905	0.829568	1	-0.803899	0.302658	1	-1.70526	0.0105846	0.335077	-1.39098	0.0588161	0.80621	1.66977	0.00392952	0.240574	-0.717028	0.510107	0.908127	-0.0611136	0.94816
circ_002241	12.445	0.001	0.001	1.41	25.35	23.24	0.001	13.035	32.515	49.75	22.355	0.001	24.83	148.475	-13.6033	0.165427	0.509793	10.4615	1	1	13.6701	0.34703	0.727343	-14.4483	0.109369	0.419126	14.6297	0.175623	0.467676	14.9888	0.0725816	0.740117	0.151487	1	1	4.04284	0.212104	1	1.93231	0.36721	1	17.1799	0.000125768	0.0173245	-0.125376	0.957928	1	0.613591	0.866844
circ_002242	0.001	39.345	0.001	45.73	0.001	34.19	0.001	41.745	1.97	41.54	0.001	38.285	0.001	65.955	15.2639	0.00793448	0.0594069	15.4809	0.00622516	0.0288349	15.3493	0.0119551	0.0786305	15.2245	0.024138	0.137828	0	1	1	10.944	1	1	0	1	1	-0.419566	0.772658	1	-0.00710219	1	1	0.784703	0.531334	1	15.0613	0.0330755	0.208994	4.39823	0.0240228
circ_002249	793.35	411.62	649.19	598.67	865.885	425.34	1185.74	693.045	1116.39	643.285	1767.03	744.805	1904.95	710.7	-0.946644	0.0146066	0.0958455	-0.11688	0.0909237	0.247159	-0.774767	0.045623	0.210892	-1.24639	2.98675e-05	0.000403292	0.415535	0.768519	0.976446	-0.0869401	0.535792	1	0.108434	0.737927	1	-0.493144	0.289681	1	-0.107491	0.585107	1	-0.0676221	0.726164	1	-1.02556	0.0181613	0.136507	-0.795318	0.00715769
circ_002256	26.395	6178.4	76.815	7977.58	18.255	5238.07	61.495	6731.4	26.32	5634.22	73.27	8407.01	7.71	8410.97	7.87082	2.02363e-58	1.1818e-55	6.69842	1.64801e-47	6.36132e-45	6.77429	3.47228e-60	1.9983e-57	6.84223	8.4778e-76	4.84082e-73	-2.0731	0.0214534	0.110628	-1.22431	0.364063	1	-3.24842	0.0306922	0.464588	-0.606916	0.0667904	0.850618	-0.25669	0.250175	1	0.000678543	0.825441	1	8.1646	1.44622e-49	8.31579e-47	7.74191	5.26763e-58
circ_002264	80.955	78.645	6.845	103.755	92.295	76.845	128.35	77.24	94.69	105.36	128.06	120.33	122.14	99.945	-0.0417651	0.971984	1	3.92199	0.000675387	0.00418234	-0.732663	0.498857	0.846879	-0.0898235	0.926375	1	3.75313	0.00589341	0.0392543	-0.438799	0.969984	1	-0.0682842	0.973239	1	-0.433158	0.64711	1	0.447907	0.656591	1	-0.26779	0.736746	1	-0.264301	0.872441	1	0.154043	1
circ_002269	128.94	305.73	116.65	248.345	103.52	281.165	151.6	352.62	123.96	323.04	171.295	542.73	131.78	495.965	1.24556	0.00499916	0.0402691	1.09016	0.194351	0.4295	1.21784	0.000660372	0.00623023	1.66375	1.45827e-06	2.48559e-05	-0.172277	0.420993	0.752699	-0.290395	0.971164	1	-0.378352	0.551257	1	0.179071	0.557362	1	-0.126401	0.589625	1	-0.129996	0.575183	1	1.44151	0.00549375	0.0513643	1.38184	0.0061603
circ_002283	76.75	280.695	63.62	119.595	51.315	169.935	56.77	265.275	30.415	192.535	89.855	105.65	95.03	64.61	1.87076	0.000139276	0.00178763	0.910605	0.531782	0.774774	2.22429	4.59244e-05	0.000580868	0.233622	0.912984	1	-0.3101	0.450458	0.777874	-0.900346	0.689785	1	0.0807842	0.961086	1	0.506826	0.327882	1	-0.462368	0.206817	1	-0.709463	0.599494	1	1.72753	0.00464513	0.0445158	2.66227	0.000171453
circ_002286	0.001	944.695	4.99	963.925	1.86	1011.79	0.001	1865.22	0.001	2886.57	0.001	1239.03	0.001	1829.92	19.8495	2.04755e-38	4.78308e-36	7.59374	9.71541e-33	1.12504e-30	20.8309	3.22938e-45	9.29253e-43	20.2408	1.95553e-45	5.58304e-43	-1.42374	0.781098	0.978034	0	1	1	0	1	1	0.0699242	0.611845	1	0.63001	0.0734304	0.868797	0.562573	0.0790477	1	9.0874	8.99938e-32	2.58732e-29	21.4609	4.30981e-57
circ_002291	35.255	147.115	30.075	106.395	55.26	181.705	80.45	106.73	108.03	181.825	104.695	159.495	115.57	303.49	2.06104	0.00401517	0.0332604	1.82279	0.0781889	0.222464	0.407801	0.37634	0.741803	0.607319	0.297983	0.729501	0.877671	0.581983	0.870462	0.425268	0.269325	1	0.142574	0.88743	1	0.772168	0.142664	1	0.768585	0.155135	0.994335	0.928138	0.0786513	1	1.71729	0.00433494	0.0418923	0.751119	0.194259
[truncated: 4 more columns]
