# Supplementary material for: A Combination of a Genome-Wide Association Study and a Transcriptome Analysis Reveals circRNAs as New Regulators Involved in the Response to Salt Stress in Maize
Source: Int J Mol Sci. 2022 Aug 28;23(17):9755. doi: 10.3390/ijms23179755 (PMC9456493; doi:10.3390/ijms23179755)
Supplement: Supplementary file 1 [file ijms-23-09755-s001.zip › Table S4-Detailed information of DEGs.xlsx]

## Sheet: Sheet1
Table S4.Detail Information of DEGs.
Gene_ID	CK_BML1234_06h	CK_BML1234_18h	CK_BML1234_36h	T_BML1234_06h	T_BML1234_18h	T_BML1234_36h	CK_L2010-3_06h	CK_L2010-3_18h	CK_L2010-3_36h	T_L2010-3_06h	T_L2010-3_18h	T_L2010-3_36h	CK_BML1234_06h-vs-T_BML1234_06h			CK_BML1234_18h-vs-T_BML1234_18h			CK_BML1234_36h-vs-T_BML1234_36h			CK_L2010-3_06h-vs-T_L2010-3_06h			CK_L2010-3_18h-vs-T_L2010-3_18h			CK_L2010-3_36h-vs-T_L2010-3_36h			T_BML1234_06h-vs-T_L2010-3_06h			T_BML1234_18h-vs-T_L2010-3_18h			T_BML1234_36h-vs-T_L2010-3_36h
													log2(fc)	Pvalue	FDR	log2(fc)	Pvalue	FDR	log2(fc)	Pvalue	FDR	log2(fc)	Pvalue	FDR	log2(fc)	Pvalue	FDR	log2(fc)	Pvalue	FDR	log2(fc)	Pvalue	FDR	log2(fc)	Pvalue	FDR	log2(fc)	Pvalue	FDR
Zm00001eb000020	21.495	26.8	16.57	20.78	21.03	8.685	12.085	9.425	10.96	8.25	9.925	8.74	-0.0488055	0.78736	0.876053	-0.349784	0.351098	0.707666	-0.931976	0.0370611	0.177364	-0.550751	0.336272	0.709141	0.0745745	0.923368	1	-0.326543	0.506343	0.944807	-1.33273	0.00017448	0.00111869	-1.08331	0.000237383	0.00124283	0.00910743	0.870943	0.984991
Zm00001eb000070	25.935	48.135	74.385	34.53	37.705	33.39	16.04	16.065	18.395	10.835	11.28	12.41	0.41295	0.108838	0.191282	-0.35233	0.301888	0.656562	-1.1556	0.000741413	0.00934377	-0.565975	0.195394	0.534466	-0.510154	0.135211	0.488334	-0.567811	0.0732895	0.393184	-1.67215	1.77978e-08	2.46926e-07	-1.74099	8.7766e-11	1.32217e-09	-1.42791	8.02555e-06	8.46372e-05
Zm00001eb000080	0.001	0.001	0.001	0.001	0.001	0.001	43.945	41.805	43.94	32.69	32.335	38.69	0	1	1	0	1	1	0	1	1	-0.42685	0.226333	0.580119	-0.370579	0.113202	0.443157	-0.183574	0.450195	0.920284	14.9966	2.91017e-37	3.53837e-35	14.9808	2.16491e-37	2.40611e-35	15.2397	1.36795e-28	2.03419e-26
Zm00001eb000090	0.225	1.365	1.165	1.7	0.685	0.315	5.565	7.125	5.935	3.415	2.49	6.34	2.91754	0.0140559	0.0341328	-0.994725	0.511902	0.840755	-1.88691	0.375129	0.710367	-0.704496	0.349869	0.722528	-1.51674	0.00730209	0.0663728	0.0952348	1	1	1.00635	0.194988	0.385237	1.86197	0.0231134	0.066835	4.33106	4.36569e-06	4.86624e-05
Zm00001eb000270	12.665	28.06	35.925	10.61	19.42	15.895	0.001	0.001	0.001	0.001	0.295	0.001	-0.255422	0.370271	0.503455	-0.530972	0.101829	0.343351	-1.17642	0.00119318	0.0136283	0	1	1	8.20457	1	1	0	1	1	-13.3731	4.97608e-14	1.33506e-12	-6.04068	7.60352e-22	3.21231e-20	-13.9563	7.38747e-15	3.02522e-13
Zm00001eb000280	16.605	27.585	26.285	9.17	15.24	13.475	0.001	0.001	0.001	0.001	0.001	0.001	-0.856624	0.00337586	0.00993113	-0.856021	0.0108644	0.0669573	-0.963954	0.0109978	0.0746666	0	1	1	0	1	1	0	1	1	-13.1627	2.09166e-12	4.7617e-11	-13.8956	3.36697e-20	1.23035e-18	-13.718	7.93819e-14	2.90246e-12
Zm00001eb000300	8.925	45.73	48.06	33.655	39.99	45.165	0.001	0.001	0.001	0.001	1.275	1.5	1.9149	2.93546e-12	4.50294e-11	-0.193502	0.726883	0.966964	-0.0896314	0.687668	0.93602	0	1	1	10.3163	0.0625469	0.30505	10.5507	0.0317676	0.232553	-15.0385	2.12098e-34	2.18208e-32	-4.97107	1.62953e-27	9.80832e-26	-4.91217	8.41424e-28	1.16047e-25
Zm00001eb000310	8.545	16.55	17.04	13.43	17.335	19.565	0.26	0.001	1.695	0.725	1.59	1.1	0.652307	0.0479694	0.0966438	0.0668566	0.641005	0.919256	0.19935	0.231598	0.553389	1.47947	0.625181	0.923844	10.6348	0.0312852	0.19159	-0.623782	0.557103	0.969829	-4.21133	5.30043e-13	1.28309e-11	-3.44659	3.14708e-14	7.0717e-13	-4.1527	9.07309e-14	3.29478e-12
Zm00001eb000330	9.775	20.185	22.465	24.73	19.255	22.635	25.09	25.08	23.545	21.065	22.15	26.68	1.33909	1.55795e-06	9.57402e-06	-0.0680505	1	1	0.0108762	0.526011	0.831116	-0.252265	0.701966	0.959166	-0.179231	0.463134	0.881516	0.180338	0.534242	0.957312	-0.231414	0.646531	0.832031	0.202074	0.296678	0.487372	0.237203	0.809232	0.950202
Zm00001eb000350	3.185	19.86	22.055	21.315	19.035	19.89	14.425	12.065	12.76	10.8	14.745	14.84	2.7425	6.41211e-16	1.56042e-14	-0.0612111	0.954092	1	-0.149062	0.905543	1	-0.41754	0.477253	0.834439	0.289398	0.442885	0.871991	0.217863	0.502739	0.944807	-0.980838	0.00267672	0.0121047	-0.368429	0.259411	0.443699	-0.422552	0.0974648	0.240019
Zm00001eb000370	10.28	25	10.655	7.56	6.45	3.295	5.47	1.98	5.17	3.345	6.08	1.08	-0.443382	0.247453	0.369248	-1.95456	0.00153829	0.0137872	-1.69318	0.0514302	0.221423	-0.709535	0.400139	0.768827	1.61857	0.0155353	0.116097	-2.25913	0.00108139	0.0188491	-1.17638	0.0478545	0.132966	-0.0852278	1	1	-1.60925	0.150363	0.328467
Zm00001eb000380	71.635	29.915	7.7	5.205	14.625	7.36	4.425	14.99	6.375	2.175	12.695	4.235	-3.78269	4.50846e-24	2.54977e-22	-1.03243	0.00150899	0.0135664	-0.0651527	0.914598	1	-1.02466	0.152187	0.45795	-0.23974	0.468554	0.887128	-0.590063	0.388315	0.871688	-1.25888	0.0491642	0.135955	-0.204176	0.706181	0.855923	-0.797344	0.119143	0.278114
Zm00001eb000390	2.535	11.73	4.615	6.755	11.97	3.705	2.505	0.845	2.23	2.55	2.55	3.76	1.41397	0.00321199	0.0094992	0.0292201	0.866847	1	-0.316857	1	1	0.0256866	1	1	1.59347	0.183638	0.578462	0.753689	0.563761	0.972345	-1.40546	0.0230551	0.0742299	-2.23085	2.78901e-05	0.000180139	0.0212591	0.916943	1
Zm00001eb000440	0.655	15.97	12.33	15.495	7.83	5.03	21.7	11.52	6.28	15.235	10.545	4.515	4.56416	4.15735e-20	1.64193e-18	-1.02828	0.0156917	0.0896736	-1.29354	0.0382103	0.181059	-0.510306	0.209123	0.555913	-0.127582	0.838402	1	-0.476039	0.654482	1	-0.0244133	0.843703	0.957711	0.429475	0.237515	0.417553	-0.155832	0.788072	0.939152
Zm00001eb000450	1.765	2.755	0.73	0.49	0.65	0.001	5.785	2.79	0.3	1.5	4.66	0.58	-1.84881	0.0680156	0.129564	-2.08354	0.047923	0.204196	-9.51175	0.250077	0.576127	-1.94735	0.0221225	0.128372	0.740065	0.289009	0.717792	0.95109	1	1	1.61411	0.136609	0.296716	2.84182	0.000126274	0.000707286	9.17991	0.517099	0.742679
Zm00001eb000460	0.61	1.905	2.27	2.5	7.865	3.89	0.001	0.001	0.001	0.001	1.015	0.001	2.03505	0.167689	0.270657	2.04566	0.00532712	0.038347	0.777078	0.255147	0.582079	0	1	1	9.98726	0.136017	0.490224	0	1	1	-11.2877	0.0125665	0.0452046	-2.95397	5.93058e-05	0.000355928	-11.9256	0.000158505	0.00121168
Zm00001eb000470	3.645	7.005	6.565	9.86	2.52	4.19	4.64	4.43	4.62	7.89	6.725	4.735	1.43567	0.0189604	0.0440374	-1.47496	0.095577	0.329228	-0.647845	0.490525	0.812105	0.7659	0.0507528	0.229916	0.602228	0.332946	0.768712	0.0354716	1	1	-0.321562	0.657332	0.839965	1.41611	0.0541363	0.134475	0.176414	1	1
Zm00001eb000490	80.34	113.835	54.095	76.915	80.66	40.05	32.69	22.39	31.97	13.785	24.135	26.575	-0.0628535	0.632061	0.750421	-0.497019	0.0907222	0.317352	-0.433693	0.347204	0.684881	-1.24575	0.00381836	0.0338289	0.108272	0.845088	1	-0.266649	0.461815	0.926856	-2.48017	4.19512e-12	9.28166e-11	-1.74073	4.46996e-12	7.88721e-11	-0.591733	0.0448119	0.133443
Zm00001eb000510	8.3	12.635	11.135	5.865	9.005	6.715	13.79	20.43	20.775	5.225	14.895	15.765	-0.50098	0.172847	0.276972	-0.488627	0.255643	0.600927	-0.729642	0.183874	0.486959	-1.40012	0.00229355	0.0222963	-0.455861	0.12772	0.474045	-0.398123	0.179204	0.638795	-0.1667	1	1	0.72603	0.009125	0.0304527	1.23127	0.00939445	0.0385897
Zm00001eb000580	120.48	35.96	61.8	87.53	20.2	16.435	155.375	42.78	107.7	61.285	30.84	38.495	-0.460944	0.0563426	0.110702	-0.832038	0.0036938	0.0285909	-1.91084	1.65386e-08	1.0261e-06	-1.34215	2.36779e-06	5.73945e-05	-0.472134	0.0524944	0.273557	-1.48428	6.68757e-10	7.51382e-08	-0.514244	0.145378	0.310749	0.610447	0.00563199	0.0200646	1.2279	0.00237216	0.0123721
Zm00001eb000590	51.125	24.79	25.005	19.7	22.375	23.16	25.94	28.94	25.355	22.41	24.125	25.115	-1.37583	3.09201e-10	3.52939e-09	-0.147871	0.833938	1	-0.110581	0.780846	0.981428	-0.211036	0.836242	1	-0.262536	0.282015	0.712287	-0.013721	1	1	0.185947	0.320488	0.54298	0.108641	0.531734	0.719355	0.116914	0.960316	1
Zm00001eb000670	53.94	16.645	16.82	19.605	17.135	16.195	20.865	18.075	19.565	20.39	18.72	16.955	-1.46013	2.36971e-11	3.16748e-10	0.0418573	0.691622	0.947241	-0.0546292	0.722622	0.956189	-0.0332231	0.723665	0.971156	0.0505848	1	1	-0.206564	0.493933	0.944807	0.0566401	0.574345	0.777331	0.127634	0.522449	0.711597	0.0661623	0.852711	0.975353
Zm00001eb000690	35.31	75.785	77.81	84.31	73.355	78.55	62.655	57.955	60.53	53.545	58.415	77.97	1.25563	8.54532e-09	7.80737e-08	-0.047017	0.867661	1	0.0136557	0.445546	0.776799	-0.226678	0.722253	0.970712	0.0114057	0.957106	1	0.365269	0.101751	0.4755	-0.654952	0.0120338	0.0434814	-0.328556	0.182141	0.345123	-0.0106921	0.541426	0.763249
Zm00001eb000700	128.905	46.715	38.895	32.31	34.425	27.17	35.115	26.625	36.245	23.3	32.07	35.06	-1.99626	1.31421e-20	5.49724e-19	-0.440429	0.152191	0.443931	-0.51757	0.301845	0.635361	-0.591757	0.0741256	0.296103	0.268443	0.378457	0.81568	-0.047956	0.866714	1	-0.471651	0.124125	0.27729	-0.102232	0.872903	0.966425	0.367811	0.548361	0.768978
Zm00001eb000720	0.655	0.375	0.78	0.815	0.215	0.725	2.895	2.88	2.935	3.16	2.31	3.73	0.315305	1	1	-0.802554	1	1	-0.105493	1	1	0.126361	0.702009	0.959166	-0.318176	0.823935	1	0.345815	0.709821	1	1.95505	0.0165538	0.0567157	3.42548	0.00379992	0.0143434	2.36312	0.0229955	0.0791434
Zm00001eb000790	23.025	30.13	44.48	65.27	57.695	61.31	20.95	15.86	16.84	32.145	17.77	18.32	1.50322	1.16022e-09	1.20845e-08	0.937246	2.20622e-05	0.000360294	0.462966	0.0107802	0.0733913	0.617644	0.00583496	0.0473077	0.164051	0.70193	1	0.121527	0.717417	1	-1.02183	0.000121432	0.000814491	-1.699	2.59634e-13	5.36183e-12	-1.7427	3.90295e-11	1.00473e-09
Zm00001eb000800	74.405	45.82	51.21	31.035	32.37	38.04	41.22	39.075	45.89	31.72	36.8	44.725	-1.2615	3.92848e-09	3.7708e-08	-0.50132	0.0898701	0.315214	-0.428908	0.353821	0.691769	-0.377952	0.313293	0.682967	-0.0865401	0.669543	0.998982	-0.0370983	0.91279	1	0.0314966	0.620161	0.812519	0.185048	0.272011	0.458978	0.233564	0.796135	0.944036
Zm00001eb000840	28.185	30.13	8.245	3.385	6.645	3.485	14.205	15.61	10.025	3.325	7.65	7.475	-3.0577	3.07449e-18	9.87798e-17	-2.18086	4.54225e-10	2.02443e-08	-1.24236	0.0437076	0.196988	-2.09497	2.60775e-05	0.000492817	-1.02894	0.010301	0.0858176	-0.423457	0.457172	0.925758	-0.0258015	1	1	0.203191	0.598006	0.775933	1.10091	0.18584	0.383432
Zm00001eb000880	2.93	13.45	2.66	2.995	3.185	0.825	7.48	1.78	3.805	2.635	1.42	2.7	0.0316553	1	1	-2.07824	0.00136805	0.0125231	-1.68896	0.180407	0.480942	-1.50524	0.00760469	0.058137	-0.325986	0.774516	1	-0.494937	0.562216	0.971809	-0.184753	1	1	-1.1654	0.0986852	0.216117	1.71049	0.203072	0.407798
Zm00001eb000900	1.25	0.001	1.47	3.54	2.46	2.35	1.54	0.001	0.57	2.165	0.805	2.62	1.50182	0.0188648	0.043831	11.2644	0.000565	0.00599656	0.676845	0.302136	0.635361	0.491437	0.629285	0.924174	9.65284	0.250056	0.673115	2.20053	0.0279293	0.21408	-0.709382	0.373207	0.599323	-1.6116	0.0796208	0.182449	0.156906	1	1
Zm00001eb000910	25.26	9.85	16.935	11.42	9.855	11.695	11.57	5.335	14.97	10.22	10.205	12.915	-1.14529	6.18115e-05	0.000278529	0.000732147	0.927055	1	-0.534116	0.348434	0.686257	-0.178994	1	1	0.935716	0.0421439	0.23623	-0.213027	0.56408	0.972427	-0.160167	0.934028	1	0.0503484	0.800854	0.922657	0.143156	1	1
Zm00001eb000930	8.29	8.785	18.62	32.785	26.945	62.98	16.01	11.9	17.9	42.095	17.84	42.93	1.98359	3.19043e-10	3.63698e-09	1.6169	6.77522e-07	1.57279e-05	1.75804	2.88999e-11	3.54379e-09	1.39468	1.07357e-06	2.82928e-05	0.584154	0.163777	0.543372	1.26203	2.28854e-05	0.000764576	0.360613	0.0690807	0.177779	-0.594902	0.0653754	0.155992	-0.552908	0.0214133	0.0747024
Zm00001eb000950	63.845	45.285	50.545	35.13	37.62	30.19	15.17	10.97	13.205	7.635	12.405	15.325	-0.86187	1.48678e-05	7.61418e-05	-0.267533	0.473177	0.814381	-0.743498	0.0335334	0.166837	-0.990521	0.0223415	0.129297	0.177358	0.791184	1	0.214803	0.53826	0.960415	-2.202	2.09566e-13	5.29337e-12	-1.60058	2.68452e-10	3.83289e-09	-0.978184	0.000383641	0.00261304
Zm00001eb000970	30.865	28.5	65.63	85.15	50.605	31.55	79.205	27.965	44.84	83.85	30.775	53.195	1.46403	4.75548e-11	6.09805e-10	0.828318	0.000361696	0.00409995	-1.05672	0.0248276	0.134602	0.0822193	0.454355	0.815124	0.138137	0.699726	1	0.246504	0.371291	0.859249	-0.0221957	0.81201	0.942058	-0.717521	0.00466309	0.0170863	0.753651	0.147217	0.323292
Zm00001eb000990	6.885	8.27	2.025	5.215	3.155	1.26	4.27	2.49	4.605	4.635	7.06	3.795	-0.400789	0.326481	0.457087	-1.39025	0.0180948	0.099936	-0.684498	0.581314	0.869947	0.118333	0.74413	0.980241	1.50352	0.0109978	0.0901249	-0.279101	0.768252	1	-0.170098	1	1	1.16203	0.0125678	0.040051	1.59068	0.0974421	0.240019
Zm00001eb001010	11.975	14.365	15.96	31.4	23.09	11.76	9.855	4.6	8.08	10.655	5.71	7.535	1.39074	6.57007e-07	4.34109e-06	0.68471	0.00657039	0.0452116	-0.440573	0.516287	0.824258	0.112603	0.538536	0.873008	0.311857	0.7605	1	-0.100748	0.909903	1	-1.55923	3.82262e-07	4.30351e-06	-2.01571	4.42911e-10	6.14683e-09	-0.642209	0.0841944	0.215391
Zm00001eb001060	7.07	16.995	8.53	22.81	16.335	10.18	31.48	32.035	37.315	28.995	16.81	31.785	1.68988	1.32225e-08	1.16931e-07	-0.0571439	1	1	0.25512	0.303947	0.637725	-0.118631	0.965349	1	-0.930329	0.00020691	0.00363326	-0.23141	0.407376	0.885366	0.346138	0.0847535	0.207685	0.0413533	0.748128	0.887685	1.64261	4.78731e-05	0.00042321
Zm00001eb001070	23.525	37.88	53.035	35.86	31.795	31.35	22.45	11.48	20.465	14.4	15.815	20.375	0.608181	0.0105804	0.0267549	-0.252636	0.526996	0.850961	-0.758479	0.0256108	0.137875	-0.640647	0.0997497	0.355701	0.462171	0.228647	0.6503	-0.00635861	1	1	-1.31631	3.53776e-06	3.31227e-05	-1.00751	6.60098e-05	0.000392121	-0.621665	0.0100186	0.0407202
Zm00001eb001080	50	161.515	56.24	141.78	116.015	43.99	32.805	8.16	17.705	62.62	30.145	23.795	1.50365	5.88884e-09	5.49927e-08	-0.477357	0.35536	0.712298	-0.354421	0.540813	0.842325	0.932708	0.000247758	0.00347663	1.88528	3.04993e-08	1.5383e-06	0.426502	0.166562	0.616244	-1.17896	0.000236069	0.00146442	-1.94432	3.96381e-14	8.81815e-13	-0.886517	0.000547031	0.0035523
Zm00001eb001090	1.255	1.59	2.03	0.63	2.36	0.425	0.001	0.001	0.395	1.135	0.4	0.5	-0.994264	0.445058	0.580127	0.56976	0.547649	0.865767	-2.25594	0.179891	0.480029	10.1485	0.0628531	0.26602	8.64386	0.500038	0.902459	0.340075	1	1	0.849269	0.534124	0.74586	-2.56071	0.014758	0.0458843	0.234465	1	1
Zm00001eb001120	69.925	38.24	135.685	22.89	16.365	99.035	37.1	15.15	178.31	38.815	17.49	132.085	-1.61109	3.34938e-13	5.79283e-12	-1.22447	0.000139101	0.00180963	-0.454251	0.326263	0.664305	0.0651951	0.40726	0.775854	0.207212	0.594164	0.961576	-0.432921	0.0356764	0.250526	0.761897	0.000874081	0.00463261	0.0959167	0.609347	0.784529	0.415456	0.3479	0.585301
Zm00001eb001160	1.265	1.67	1.375	0.67	1.03	1.02	5.48	6.91	5.585	2.47	4.47	4.87	-0.916904	0.400046	0.535296	-0.697204	0.776512	0.98784	-0.430862	1	1	-1.14966	0.0976242	0.351304	-0.628411	0.195001	0.597139	-0.197636	0.882592	1	1.88228	0.0248195	0.0788663	2.11763	0.00112604	0.00495408	2.25535	0.0114233	0.0451738
Zm00001eb001170	21.305	22.065	36.395	9.05	10.715	27.365	11.54	21.765	15.905	4.225	6.255	9.23	-1.2352	3.37703e-05	0.000161011	-1.04213	0.00543468	0.0389647	-0.411408	0.44362	0.774503	-1.44962	0.00158684	0.0163692	-1.79893	2.3638e-07	9.72214e-06	-0.785078	0.0277392	0.213064	-1.09897	0.0197491	0.0654364	-0.77655	0.0540472	0.134303	-1.56793	1.29454e-06	1.60196e-05
Zm00001eb001180	4.38	7.655	11.7	7.03	7.67	11.11	6.54	7.46	7.225	4.08	6.005	5.2	0.682594	0.128224	0.218548	0.0028242	0.914999	1	-0.0746497	0.780485	0.981259	-0.680721	0.274343	0.636898	-0.313011	0.508606	0.902679	-0.474486	0.360255	0.850196	-0.784956	0.144806	0.309947	-0.353062	0.51132	0.701912	-1.09528	0.00992695	0.0404401
Zm00001eb001190	10.49	11.515	5.055	4.32	2.955	0.835	3.515	2.73	4.27	2.17	2.83	2.955	-1.27991	0.000475327	0.00173833	-1.96228	0.000129893	0.00170681	-2.59786	0.00371933	0.0330746	-0.69583	0.438512	0.804315	0.0519011	1	1	-0.531078	0.499476	0.944807	-0.993336	0.135755	0.295382	-0.0623561	1	1	1.82331	0.194626	0.395522
Zm00001eb001280	0.185	3.99	3.205	4.23	6.715	0.99	2.76	29.17	4.325	4.315	14.945	14.375	4.51506	1.87142e-05	9.4074e-05	0.750999	0.106074	0.352574	-1.69482	0.0770537	0.285796	0.644692	0.236606	0.593582	-0.964822	0.0356688	0.210763	1.73279	1.28491e-05	0.00047036	0.0287029	0.898819	0.98859	1.1542	0.0040901	0.0152837	3.85999	4.331e-09	8.25807e-08
Zm00001eb001360	26.99	16.745	17.28	12.925	12.42	14.99	17.305	16.79	21.315	11.645	11.66	17.39	-1.06226	3.52514e-05	0.000167585	-0.431065	0.29344	0.646809	-0.205103	1	1	-0.571478	0.191506	0.528089	-0.526034	0.0820099	0.362397	-0.293611	0.316096	0.806922	-0.150454	0.940739	1	-0.0910974	1	1	0.214258	0.897191	0.999432
Zm00001eb001390	86.475	90.52	82.68	135.97	112.725	90.78	70.78	40.76	55.085	64.805	36.435	37.75	0.652933	0.00876957	0.0227763	0.316499	0.0819907	0.296228	0.134836	0.241391	0.566678	-0.127237	1	1	-0.161829	0.459502	0.878745	-0.545183	0.0553011	0.33309	-1.06911	0.000267702	0.00163277	-1.62941	3.42878e-13	6.94703e-12	-1.2659	1.77413e-05	0.000174773
Zm00001eb001410	2.915	8.605	13.16	0.001	8.51	3.625	0.001	0.001	0.001	0.001	0.001	0.001	-11.5093	0.00370875	0.0107916	-0.0160161	0.968066	1	-1.86011	0.00808797	0.0585908	0	1	1	0	1	1	0	1	1	0	1	1	-13.0549	0.000321987	0.00162144	-11.8238	0.00954357	0.0390937
Zm00001eb001460	9.615	15.16	9.475	7.42	7.3	3.805	5.315	4.53	5.3	3.36	4.955	3.58	-0.373868	0.232051	0.350721	-1.0543	0.00694555	0.0471719	-1.31623	0.0154274	0.0955282	-0.661608	0.356752	0.730637	0.129374	1	1	-0.566033	0.35881	0.849272	-1.14296	0.0362109	0.10691	-0.559011	0.243973	0.424781	-0.0879369	0.876657	0.988703
Zm00001eb001520	2.895	3.125	2.64	2.31	2.47	1.79	0.001	0.001	0.001	0.001	0.001	0.001	-0.32567	0.659807	0.773749	-0.339345	0.851732	1	-0.560578	0.814702	0.995534	0	1	1	0	1	1	0	1	1	-11.1737	0.00175727	0.00842538	-11.2703	0.000567038	0.00268769	-10.8057	0.0113491	0.0449799
Zm00001eb001530	59.085	42.2	51.16	69.39	45.135	32.45	87.34	70.53	84.515	52.435	51.805	75.875	0.231936	0.378157	0.511857	0.0970036	0.495249	0.831144	-0.656798	0.0996919	0.337666	-0.736112	0.149741	0.454664	-0.445146	0.153462	0.523778	-0.155583	0.645267	1	-0.404198	0.438772	0.663016	0.198845	0.239045	0.419471	1.22541	0.00715452	0.0308154
Zm00001eb001550	2.44	2.65	2.685	3.845	2.8	1.41	8.97	11.535	7.93	8.26	7.95	8.495	0.656102	0.29177	0.418332	0.0794345	1	1	-0.929227	0.454877	0.781971	-0.118966	1	1	-0.536991	0.12722	0.473303	0.0992931	0.909232	1	1.10316	0.00647465	0.0257916	1.50553	0.000913826	0.00412624	2.59092	0.000110284	0.00088287
Zm00001eb001560	30.315	43.55	32.985	51.735	50.57	16.9	46.355	37.2	37.53	70.785	83.21	41.79	0.771109	0.000514079	0.00186288	0.215609	0.236422	0.577793	-0.964787	0.00936713	0.0659734	0.610719	0.000893092	0.0102595	1.16145	2.22816e-05	0.000533532	0.155113	0.552982	0.967905	0.452303	0.0138953	0.0490739	0.718475	0.000266883	0.00137974	1.30613	0.000284933	0.00201336
Zm00001eb001590	18.1	7.335	14.3	20.01	19.815	37.245	9.09	9.095	12.015	10.15	8.275	10.425	0.144731	0.695346	0.802593	1.43372	2.13124e-05	0.000349577	1.38103	8.13394e-07	2.98658e-05	0.159128	0.537721	0.872303	-0.136314	0.73047	1	-0.204789	0.628668	0.999434	-0.979241	0.00448044	0.0188944	-1.25976	0.000152552	0.000837489	-1.837	3.07283e-08	5.04986e-07
Zm00001eb001650	38.555	43.21	50.97	237.905	107.775	66.535	44.84	31.74	48.885	228.69	46.395	38.355	2.6254	7.82036e-19	2.7051e-17	1.31859	4.91827e-08	1.49445e-06	0.384465	0.0541385	0.229403	2.35054	6.29892e-20	1.17753e-17	0.547667	0.032232	0.196145	-0.349977	0.144806	0.572215	-0.0569923	0.897027	0.987634	-1.21598	2.79759e-07	2.64316e-06	-0.794699	0.00223741	0.0117628
Zm00001eb001690	3.705	9.365	4.755	6.12	4.475	0.825	2.845	1.925	2.31	1.075	1.425	0.75	0.724058	0.154456	0.253574	-1.06539	0.0426572	0.187657	-2.52698	0.00725765	0.0546339	-1.40409	0.147272	0.449426	-0.433897	0.774516	1	-1.62293	0.190364	0.654443	-2.50919	0.00017955	0.00114789	-1.65093	0.0163095	0.0498483	-0.137504	1	1
Zm00001eb001700	19.54	10.435	14.3	9.57	8.235	7.43	15.05	12.08	16.305	10.44	17.095	20.73	-1.02984	0.000227994	0.000904685	-0.34159	0.582434	0.88756	-0.944581	0.0448818	0.201372	-0.527642	0.282887	0.649193	0.500954	0.15526	0.526871	0.346406	0.2741	0.767394	0.125531	0.568796	0.773028	1.05373	0.000319982	0.00161316	1.48029	0.000727176	0.00453514
Zm00001eb001710	8.545	14.035	14.24	11.68	14.765	13.6	11.06	16.035	18.95	15.925	23.585	27.235	0.450888	0.214139	0.329468	0.0731523	0.705111	0.954374	-0.0663425	0.742431	0.964964	0.525942	0.0367947	0.183797	0.556645	0.0791844	0.353923	0.523264	0.0590792	0.34529	0.447253	0.083239	0.204948	0.675688	0.00584229	0.0207376	1.00186	0.0111363	0.0443353
Zm00001eb001720	29.325	22.61	24.265	30.67	18.255	24.225	7.4	4.32	5.51	9.625	6.605	8.095	0.0646971	0.947854	0.999378	-0.308669	0.460425	0.805392	-0.00238019	0.534793	0.838256	0.379261	0.214603	0.563187	0.612527	0.300892	0.732944	0.554979	0.283182	0.776841	-1.67197	1.97217e-08	2.72066e-07	-1.46666	9.06167e-06	6.48628e-05	-1.58139	1.33767e-05	0.000135128
Zm00001eb001770	8.635	8.705	6.055	1.965	3.125	3.71	10.13	9.645	7.475	4.48	7.685	5.665	-2.13567	2.95376e-06	1.72991e-05	-1.47799	0.00656999	0.0452116	-0.706708	0.43231	0.763365	-1.17706	0.0306669	0.162781	-0.327736	0.51568	0.908763	-0.399998	0.440041	0.912707	1.18897	0.0482864	0.133929	1.29819	0.0036609	0.0138793	0.610657	0.481401	0.715902
Zm00001eb001780	16.67	23.015	22.04	41.85	31.605	18.94	31.66	26.98	28.96	50.045	44.915	42.725	1.32797	4.55309e-08	3.71063e-07	0.457578	0.0410566	0.182923	-0.218688	1	1	0.660565	0.00118502	0.0129682	0.735307	0.00373606	0.0390937	0.561019	0.0309486	0.228778	0.257998	0.131195	0.28855	0.507045	0.00781774	0.0267465	1.17364	0.00180191	0.00979243
Zm00001eb001810	23.225	47.905	44.24	60.045	54.145	46.8	47.77	40.845	49.39	88.755	59.365	58.215	1.37037	8.37429e-10	8.93929e-09	0.176652	0.303952	0.658988	0.0811571	0.292713	0.625529	0.893724	3.51921e-06	8.17423e-05	0.539453	0.0290228	0.182186	0.237172	0.284357	0.778255	0.563784	0.0027171	0.0122728	0.132784	0.377489	0.57436	0.314882	0.581321	0.79568
Zm00001eb001830	2.285	2.16	2.02	4.81	2.625	0.34	3.425	2.975	1.725	1	1.605	1.31	1.07384	0.0553303	0.109033	0.281286	0.70441	0.954167	-2.57075	0.039326	0.183837	-1.7761	0.0761912	0.301161	-0.890316	0.396028	0.829232	-0.39703	0.802255	1	-2.26604	0.00385814	0.0166588	-0.709744	0.443529	0.639737	1.94596	0.30859	0.540043
Zm00001eb001850	1.58	2.835	2.79	36.555	7.57	4.99	1.99	1.275	1.685	22.69	17.33	10.685	4.53207	2.83049e-33	3.65106e-31	1.41694	0.00331317	0.026171	0.838775	0.0744242	0.280233	3.51122	1.19763e-17	1.84144e-15	3.7647	1.28406e-10	1.03663e-08	2.66477	3.35234e-05	0.00106106	-0.688012	0.0194673	0.0647352	1.19491	0.000149992	0.00082493	1.09848	0.107127	0.256594
Zm00001eb001860	107.01	39.81	46.945	35.01	29.425	36.105	28.075	23.93	39.75	21.895	31.385	56.965	-1.61191	1.46044e-12	2.34037e-11	-0.436088	0.193304	0.513019	-0.378773	0.482658	0.805372	-0.358685	0.43548	0.801653	0.391255	0.164927	0.545925	0.519121	0.0203762	0.171092	-0.677166	0.0293059	0.0901556	0.0930328	0.537492	0.724254	0.657877	0.0678359	0.18459
Zm00001eb001880	36.735	21.59	22.615	16.95	13.4	15.38	32.12	9.14	23.785	15.33	13.05	24.9	-1.11587	1.9996e-06	1.20616e-05	-0.68813	0.0484933	0.206122	-0.556224	0.236318	0.56037	-1.06711	0.000931067	0.0106253	0.513784	0.20254	0.610077	0.0660937	0.867779	1	-0.144928	0.901455	0.989896	-0.0381832	1	1	0.69509	0.111209	0.263928
Zm00001eb001900	54.935	39.88	60.185	17.95	23.96	40.82	21.58	17.51	45.905	10.6	23.86	36.785	-1.61374	3.29456e-12	5.01559e-11	-0.735038	0.0112509	0.0689173	-0.560128	0.154606	0.438054	-1.02563	0.00375711	0.0334201	0.446415	0.149595	0.51701	-0.319534	0.242806	0.729712	-0.75992	0.0323998	0.0980721	-0.00603387	0.845476	0.949966	-0.150159	0.345402	0.582815
Zm00001eb001930	74.405	16.065	16.23	19.38	36.115	64.26	3.665	3.3	3.79	3.745	4.35	3.875	-1.94083	1.59896e-12	2.54857e-11	1.16868	1.70786e-05	0.000288451	1.98526	1.17199e-11	1.58682e-09	0.0311525	1	1	0.398549	0.617434	0.971846	0.0319985	1	1	-2.37153	2.24594e-08	3.08402e-07	-3.05351	2.85929e-20	1.05056e-18	-4.05165	1.40441e-27	1.85983e-25
Zm00001eb001940	7.805	15.555	12.315	54.675	70.37	29.13	8.565	15.08	8.93	18.99	17.595	14.685	2.80841	1.59433e-18	5.26452e-17	2.17758	8.80624e-11	4.42205e-09	1.24209	8.8199e-06	0.000227012	1.14871	0.000116087	0.00181499	0.222529	0.536618	0.924597	0.717611	0.0407053	0.272237	-1.52564	1.65438e-06	1.64509e-05	-1.99979	3.30783e-11	5.27696e-10	-0.988162	0.000303388	0.00212683
Zm00001eb001960	2.41	0.001	0.325	1.205	0.22	0.84	3.165	5.775	5.59	6.465	2.565	10.015	-1	0.259973	0.383083	7.78136	1	1	1.36995	0.375129	0.710367	1.03044	0.0310829	0.163965	-1.17086	0.12168	0.464966	0.841242	0.143996	0.569879	2.42362	0.000308891	0.00185051	3.54338	0.00927171	0.0308654	3.57563	9.48717e-07	1.2077e-05
Zm00001eb001970	0.001	0.001	0.39	0.195	0.435	1.01	3.63	0.001	1.195	0.001	0.39	0.001	7.60733	1	1	8.76487	0.502702	0.834965	1.37281	0.375129	0.710367	-11.8258	7.95589e-05	0.00130761	8.60733	0.500038	0.902459	-10.2228	0.0850347	0.430937	-7.60733	1	1	-0.157541	1	1	-9.98014	0.139374	0.311782
Zm00001eb002020	10.23	2.63	2.795	1.375	1.375	1.255	3.595	2.625	3.435	0.9	1.725	2.21	-2.8953	9.50105e-09	8.62339e-08	-0.935631	0.248756	0.593466	-1.15516	0.302136	0.635361	-1.99799	0.0192956	0.116279	-0.605721	0.454773	0.875314	-0.636264	0.410672	0.888437	-0.611435	0.782394	0.924229	0.327165	0.807368	0.92664	0.816359	0.451131	0.686929
Zm00001eb002030	2.91	4.985	3.885	6.185	4.63	4.185	7.4	1.795	4.19	8.825	3.09	3.05	1.08775	0.016771	0.0396486	-0.106581	1	1	0.107313	0.603463	0.886561	0.254071	0.367502	0.741419	0.783623	0.503769	0.902459	-0.458141	0.474465	0.93416	0.512823	0.137085	0.29754	-0.583405	0.359883	0.555877	-0.456418	0.429556	0.667675
Zm00001eb002090	11.955	61.1	14.4	8.07	14.385	3.61	22.065	17.345	18.98	7.62	10.16	7.055	-0.566974	0.0811036	0.149735	-2.08661	2.17112e-08	7.02979e-07	-1.996	8.60776e-05	0.00155935	-1.5339	0.000236309	0.00334632	-0.771619	0.0250628	0.164495	-1.42776	0.00161826	0.0259262	-0.0827777	1	1	-0.501665	0.180805	0.343133	0.966647	0.276792	0.502945
Zm00001eb002100	54.95	66.01	61.115	127.275	75.13	66.54	44.635	56.785	62.225	119.84	105.49	71.615	1.21176	2.99076e-08	2.51003e-07	0.186705	0.287543	0.639576	0.122695	0.227894	0.548396	1.42486	3.84598e-07	1.13437e-05	0.893524	0.000342911	0.00557814	0.202767	0.428865	0.90492	-0.0868395	0.972201	1	0.489645	0.0074413	0.0256025	0.10604	0.871548	0.985424
Zm00001eb002170	12.975	11.415	12.14	9.46	8.65	8.46	27.635	21.95	26.09	17.75	27.04	31.24	-0.455822	0.128947	0.219457	-0.400159	0.413658	0.768235	-0.521039	0.42887	0.760446	-0.638678	0.0673412	0.277844	0.300874	0.347656	0.784671	0.259898	0.335748	0.828327	0.907907	0.00118681	0.00605317	1.64432	4.00227e-10	5.57757e-09	1.88466	9.02935e-07	1.15328e-05
Zm00001eb002180	86.745	86.83	90.93	98.3	123.2	125.705	51.3	81.975	100.805	106.775	80.88	100.395	0.180411	0.481244	0.615091	0.504737	0.0132797	0.0787811	0.467214	0.0131109	0.0846366	1.05754	8.6919e-07	2.34294e-05	-0.019401	0.855823	1	-0.00587978	0.974806	1	0.119311	0.339147	0.563959	-0.607147	0.00854431	0.0287584	-0.324355	0.0707196	0.190412
Zm00001eb002230	5.13	10.19	9.775	8.125	6.585	6.89	19.935	20.1	22.265	13.275	18.03	21.85	0.663409	0.114802	0.199635	-0.629899	0.191012	0.509507	-0.504593	0.540176	0.842275	-0.586592	0.133489	0.42514	-0.156796	0.573121	0.948693	-0.0271443	1	1	0.708272	0.0228787	0.0737506	1.45314	1.26076e-06	1.05993e-05	1.66506	0.000368199	0.00251882
Zm00001eb002240	7.845	2.815	4.415	3.255	2.64	3.485	1.45	0.001	2.07	0.001	0.001	1.195	-1.26912	0.00339973	0.00999124	-0.092597	1	1	-0.341255	1	1	-10.5018	0.0350126	0.1778	0	1	1	-0.79262	0.629853	0.999594	-11.6684	5.10402e-05	0.00037374	-11.3663	0.000270514	0.00139475	-1.54415	0.0846805	0.216276
Zm00001eb002270	0.001	0.001	0.001	0.001	0.34	0.001	2.86	11.255	0.42	2.105	0.89	0.215	0	1	1	8.40939	0.503521	0.834965	0	1	1	-0.442195	0.831953	1	-3.66062	1.02311e-06	3.60034e-05	-0.966053	1	1	11.0396	0.0011967	0.00608927	1.38827	0.461421	0.656013	7.74819	1	1
Zm00001eb002280	1.345	1.765	0.001	1.885	0.995	0.885	5.315	14.235	7.495	0.215	4.44	0.775	0.486958	0.742984	0.841921	-0.8269	0.589222	0.890642	9.78953	0.125077	0.385348	-4.62766	5.81479e-06	0.000127832	-1.68081	0.00242447	0.0276555	-3.27366	0.000350144	0.00751666	-3.13216	0.0818336	0.202345	2.15779	0.00208639	0.00851243	-0.191481	1	1
Zm00001eb002380	3.53	2.005	2.375	26.015	16.87	3.67	0.355	0.38	1.02	13.405	1.65	0.001	2.8816	3.4651e-15	7.69582e-14	3.07279	1.57612e-11	8.75465e-10	0.627853	0.308059	0.641448	5.23881	1.65581e-09	7.92382e-08	2.11839	0.179835	0.570484	-9.99435	0.127313	0.53833	-0.956572	0.0267692	0.0838661	-3.35392	1.0181e-13	2.18859e-12	-11.8416	9.22805e-05	0.000756956
Zm00001eb002390	10.76	6.42	2.625	4.39	7.83	0.755	3.43	10.13	15.53	9.355	6.865	2.885	-1.29339	0.000465597	0.00170871	0.286439	0.441278	0.790544	-1.79777	0.0925015	0.321996	1.44753	0.000626278	0.00763314	-0.561303	0.184729	0.58001	-2.42841	5.30999e-06	0.000221993	1.09152	0.00591093	0.0238191	-0.189753	0.762434	0.897552	1.93402	0.177206	0.370183
Zm00001eb002400	0.705	0.955	0.001	0.001	0.56	0.001	0.81	0.525	1.31	2.29	3.03	0.63	-9.46148	0.0748043	0.140251	-0.770074	1	1	0	1	1	1.49935	0.0665362	0.275266	2.52893	0.0352563	0.209132	-1.05614	0.732685	1	11.1611	0.000744294	0.00402937	2.43582	0.00485417	0.0176848	9.29921	0.517769	0.742685
Zm00001eb002420	38.225	27.965	16.99	18.765	15.91	12.775	9.165	9.115	12.68	7.625	10.535	13.995	-1.02647	1.11333e-05	5.85626e-05	-0.813688	0.00998909	0.0625951	-0.411363	0.602343	0.885634	-0.265398	0.843661	1	0.208876	0.671692	1	0.142357	0.731076	1	-1.29924	0.000198998	0.00125602	-0.594744	0.0724908	0.169356	0.131588	1	1
Zm00001eb002440	20.01	12.89	9.615	9.87	11.115	6.155	13.18	7.085	13.58	10.145	8.74	10.93	-1.0196	0.000914996	0.00313355	-0.213744	0.710212	0.957555	-0.643528	0.295411	0.629159	-0.377582	0.568463	0.891676	0.302865	0.639219	0.982953	-0.31319	0.433523	0.908515	0.0396469	0.799033	0.934022	-0.346803	0.414839	0.612182	0.828463	0.173238	0.364256
Zm00001eb002480	1.75	2.4	1.5	1.655	1.92	1.62	3.355	4.93	3.615	3.265	5.345	3.615	-0.0805237	1	1	-0.321928	0.827715	1	0.111031	1	1	-0.0392298	1	1	0.116602	1	1	-1.60171e-16	1	1	0.980252	0.139768	0.302089	1.47708	0.00718347	0.0248238	1.158	0.269755	0.493459
Zm00001eb002510	3.115	6.315	0.55	0.705	1.01	0.001	25.145	108.31	15.93	13.25	59.545	15.525	-2.14354	0.0156178	0.0373574	-2.64443	0.000144321	0.0018664	-9.10329	0.501047	0.815753	-0.924279	0.0128062	0.0862991	-0.863114	0.00547152	0.0526866	-0.037153	0.940295	1	4.23223	6.45658e-11	1.2515e-09	5.88155	7.57984e-32	5.97136e-30	13.9223	2.08489e-14	8.13717e-13
Zm00001eb002520	53.99	39.415	51.605	29.115	28.245	18.64	21.05	12.345	24.605	8.935	12.925	21.14	-0.89093	5.26328e-05	0.000240858	-0.480749	0.125485	0.393686	-1.46911	3.68387e-06	0.000108578	-1.23628	0.00151151	0.0157674	0.0662374	1	1	-0.218976	0.435777	0.909817	-1.70422	1.81132e-06	1.78852e-05	-1.12783	5.10668e-05	0.000311862	0.181574	1	1
Zm00001eb002550	56.7	91.3	107.465	77.235	87.185	88	39.47	49.01	44.09	32.115	35.005	35.85	0.445906	0.0651068	0.12495	-0.0665349	0.936437	1	-0.288291	0.726842	0.956872	-0.297509	0.506643	0.851772	-0.485515	0.028213	0.17865	-0.298478	0.211278	0.688623	-1.26601	3.63185e-07	4.10428e-06	-1.31652	1.11279e-09	1.47774e-08	-1.29553	3.41171e-07	4.68833e-06
Zm00001eb002570	36.075	83.35	106.37	146.175	95.565	123.745	121.6	71.605	91.67	99.715	75.48	100.365	2.01863	1.40842e-19	5.246e-18	0.1973	0.215876	0.547687	0.218279	0.102281	0.343527	-0.286261	0.485869	0.839505	0.0760341	0.845131	1	0.130735	0.561914	0.971544	-0.551814	0.0331397	0.0999097	-0.340388	0.149499	0.296882	-0.302114	0.0912359	0.22833
Zm00001eb002580	32.655	137.67	113.55	142.49	124.725	130.37	61.27	92.31	48.66	94.075	90.29	63.91	2.12548	1.73585e-21	7.93248e-20	-0.142464	0.814498	1	0.199284	0.180393	0.480942	0.618631	0.000581644	0.00716304	-0.0319207	0.806753	1	0.393305	0.103023	0.478244	-0.598977	0.0176245	0.0597588	-0.466113	0.0386596	0.102474	-1.0285	0.000199283	0.00148212
Zm00001eb002590	17.11	42.045	37.595	40.035	43.585	39.51	6.375	17.525	4.635	11.45	13.4	9.45	1.22642	9.38807e-06	5.01175e-05	0.0518975	0.581389	0.887002	0.071677	0.353193	0.690918	0.84485	0.0144629	0.0947841	-0.387181	0.354307	0.792835	1.02774	0.0564201	0.336798	-1.80591	4.5203e-10	7.80591e-09	-1.7016	1.65216e-11	2.71658e-10	-2.06383	2.65053e-09	5.23381e-08
Zm00001eb002620	10.065	7.085	5.5	3.805	10.685	6.075	11.675	9.23	20.435	7.08	17.14	25.86	-1.40338	0.00268738	0.00811639	0.592747	0.0884049	0.311663	0.143453	0.477347	0.802037	-0.721601	0.196208	0.535967	0.892965	0.0797774	0.356212	0.33968	0.537721	0.960415	0.895853	0.0712539	0.182076	0.68178	0.0870031	0.195815	2.08977	0.000495223	0.00327012
Zm00001eb002640	50.225	94.515	100.26	69.32	62.455	72.585	102.355	69.53	125.035	72.56	91.43	150.3	0.464866	0.0421021	0.0866906	-0.597726	0.0274083	0.13609	-0.466003	0.307242	0.641448	-0.496335	0.107613	0.374122	0.395032	0.124203	0.467948	0.265513	0.224184	0.7051	0.0659028	0.468445	0.690951	0.549851	0.00354628	0.013504	1.0501	0.0012961	0.00746833
Zm00001eb002680	6.275	8.56	31.86	7.365	9.37	20.83	3.57	4.275	18.605	5.565	5.655	9.51	0.23107	0.731848	0.832686	0.130438	0.640349	0.918946	-0.613083	0.160631	0.450024	0.640458	0.15174	0.457648	0.403603	0.529069	0.917745	-0.968173	0.00274908	0.038798	-0.404304	0.53563	0.747333	-0.728522	0.0990489	0.21675	-1.13115	0.000911685	0.00552281
Zm00001eb002690	81.96	138.29	160.42	183.43	197.175	147.895	109.775	85.51	182.87	171.445	171.395	265.815	1.16224	3.55385e-07	2.47559e-06	0.51178	0.00555352	0.0396105	-0.117281	0.774959	0.978523	0.643196	0.000305479	0.00413646	1.00316	5.45632e-05	0.00116622	0.539604	0.010377	0.106554	-0.0974838	1	1	-0.202152	0.426219	0.624044	0.845849	0.00694059	0.03003
Zm00001eb002700	19.36	31.025	44.74	28.315	25.305	56.03	31.155	23.635	23.575	34.355	20.355	22.675	0.548488	0.0413367	0.0853024	-0.294009	0.449717	0.797896	0.324634	0.100208	0.33906	0.141056	0.342925	0.716196	-0.215542	0.442823	0.871991	-0.0561552	0.855596	1	0.278954	0.140689	0.303418	-0.314039	0.317615	0.511072	-1.3051	2.4483e-05	0.00023358
Zm00001eb002710	8.545	5.145	5	3.855	6.105	3.3	9.01	5.53	15.365	13.98	8.48	14.375	-1.14835	0.00350692	0.0102717	0.24682	0.675563	0.937984	-0.599462	0.499769	0.815753	0.633765	0.0485455	0.222951	0.616785	0.222185	0.640401	-0.0960858	0.809826	1	1.85856	1.71884e-05	0.000140475	0.474073	0.298287	0.48917	2.12302	5.34015e-05	0.000465131
Zm00001eb002740	26.57	19.525	21.74	12.225	14.855	14.92	14.665	21.965	21.675	8.805	16.105	19.59	-1.11996	1.05406e-05	5.57248e-05	-0.394374	0.291158	0.644078	-0.543104	0.276192	0.607224	-0.735982	0.0839567	0.319651	-0.447698	0.099552	0.408677	-0.145915	0.657795	1	-0.47344	0.311033	0.532707	0.11656	0.580731	0.761971	0.39287	0.501454	0.73277
Zm00001eb002760	98.405	142.8	93.045	62.915	49.39	13.135	40.86	26.035	58.38	27.32	20.4	10.815	-0.645328	0.00587723	0.0160441	-1.53171	4.19097e-09	1.55745e-07	-2.82451	1.01724e-12	1.70607e-10	-0.580732	0.391285	0.759839	-0.351883	0.183555	0.578344	-2.43244	7.48294e-06	0.000300173	-1.20345	0.0093038	0.0351111	-1.27565	1.39773e-07	1.39227e-06	-0.280383	0.556021	0.774943
Zm00001eb002770	3.33	8.255	8.76	12.765	9.975	6.215	0.001	0.001	0.001	0.001	0.001	0.001	1.9386	2.36416e-07	1.70539e-06	0.273049	0.345102	0.702175	-0.495176	0.534323	0.837794	0	1	1	0	1	1	0	1	1	-13.6399	3.4791e-16	1.13933e-14	-13.2841	8.07415e-14	1.75541e-12	-12.6015	1.97205e-07	2.80556e-06
Zm00001eb002780	47.695	36.64	24.98	42.66	58.175	2.26	25.17	17.51	35.495	28.21	36.82	16.69	-0.160954	0.595584	0.718018	0.66698	0.00844332	0.0546633	-3.46638	1.35149e-10	1.43989e-08	0.164501	0.645068	0.932419	1.07231	0.00412997	0.0421005	-1.08863	0.116961	0.514336	-0.596677	0.425944	0.650467	-0.65991	0.0579301	0.142015	2.88459	0.00056766	0.00366569
Zm00001eb002790	23.65	29.445	25.075	36.525	50.72	4.87	42.535	28.515	47.375	55.895	49.99	36.44	0.627044	0.0782746	0.145384	0.784532	0.000663305	0.00682935	-2.36426	7.60081e-08	3.78526e-06	0.394069	0.330266	0.702749	0.809918	0.00361092	0.0380909	-0.378603	0.510413	0.945422	0.613835	0.192609	0.382061	-0.0209152	0.904383	0.985112	2.90353	1.01631e-05	0.000105672
Zm00001eb002800	85.905	71.42	61.225	82.185	124.605	12.05	51.365	46.75	97.725	82.635	92.955	67.755	-0.063867	0.751475	0.848491	0.802962	0.000421516	0.00466682	-2.34509	1.86724e-11	2.41271e-09	0.685967	0.13275	0.423486	0.991566	0.000863038	0.0118985	-0.5284	0.419246	0.897542	0.00787786	0.85866	0.965784	-0.422758	0.15608	0.307036	2.49129	0.000103951	0.000838982
Zm00001eb002830	2.955	3.985	3.12	7.015	5.285	2.685	4.65	1.47	2.965	8.105	3.99	1.475	1.24728	0.0103074	0.0261606	0.407324	0.404397	0.758684	-0.216624	1	1	0.801581	0.0363111	0.182046	1.44057	0.0934203	0.394307	-1.00732	0.239912	0.725343	0.208369	0.498785	0.717709	-0.405515	0.582501	0.763301	-0.864207	0.381846	0.62089
Zm00001eb002880	11.775	17.25	40.525	8.025	7.94	31.78	0.001	0.001	0.47	0.001	0.001	0.001	-0.553154	0.0710792	0.134315	-1.11939	0.00380255	0.0292854	-0.350693	0.590909	0.877167	0	1	1	0	1	1	-8.87652	0.50477	0.944807	-12.9703	4.73598e-11	9.34238e-10	-12.9549	3.61093e-10	5.06381e-09	-14.9558	6.38238e-27	8.20706e-25
Zm00001eb002910	98.77	43.765	51.315	31.345	37.31	34.85	10.265	8.88	10.515	5.405	8.75	9.9	-1.65584	1.43113e-13	2.57909e-12	-0.230215	0.580148	0.886245	-0.558222	0.156634	0.442468	-0.925367	0.0601521	0.258484	-0.0212767	1	1	-0.0869484	0.919053	1	-2.53587	7.56481e-13	1.79868e-11	-2.09221	4.04374e-15	9.81084e-14	-1.81566	2.85453e-09	5.6158e-08
Zm00001eb002920	6.445	3.025	1.935	2.965	2.66	2.595	1.745	1.9	2.05	2.555	1.875	1.435	-1.12015	0.0134668	0.0329159	-0.185509	0.85692	1	0.423401	0.481096	0.804281	0.550096	0.359636	0.732811	-0.0191088	1	1	-0.514573	0.806342	1	-0.214709	1	1	-0.504536	0.694829	0.847418	-0.854684	0.246924	0.466002
Zm00001eb002950	158.585	142.175	113.415	308.86	231.97	260.31	13.235	11.26	22.52	7.27	7.785	13.15	0.961697	0.0182689	0.0426165	0.70627	0.002035	0.0175073	1.19862	0.000196439	0.00309556	-0.864331	0.0521131	0.234041	-0.532438	0.175862	0.566063	-0.776144	0.00933304	0.0986147	-5.40885	6.91039e-72	8.8022e-69	-4.8971	2.73906e-68	2.03794e-65	-4.3071	8.43205e-25	8.83639e-23
Zm00001eb003030	17.525	21.34	21.735	21.365	27.115	29.13	27.85	40.06	32.69	42.98	40.185	26.9	0.285835	0.337822	0.468953	0.345531	0.120897	0.384595	0.422486	0.0283208	0.148433	0.625988	0.00543883	0.0446675	0.00449466	0.943255	1	-0.281243	0.263706	0.75464	1.00842	4.94135e-05	0.000363321	0.567566	0.00483965	0.0176415	-0.1149	0.391408	0.630483
Zm00001eb003040	15.505	13.345	15.85	10.575	13.19	10.78	51.21	50.595	61.515	28.38	44.235	47.29	-0.552076	0.0518843	0.103299	-0.0168547	0.883427	1	-0.556126	0.36618	0.703199	-0.851551	0.0027995	0.0262902	-0.193806	0.351034	0.788217	-0.379403	0.0935653	0.454075	1.42422	7.62373e-08	9.58755e-07	1.74574	3.89118e-13	7.83059e-12	2.13318	2.59007e-09	5.12584e-08
Zm00001eb003050	0.565	0.001	0.795	0.3	0.24	0.33	1.22	3.11	1	2.695	1.965	2.585	-0.913288	0.694214	0.802127	7.90689	1	1	-1.26849	0.625077	0.898014	1.1434	0.105986	0.370219	-0.662385	0.359629	0.798034	1.37016	0.18033	0.639452	3.16725	0.00214615	0.0100731	3.03342	0.0146331	0.045554	2.96963	0.0167751	0.0616274
Zm00001eb003110	10.855	6.455	8.72	14.935	10.58	11.085	4.33	3.935	3.835	2.025	2.565	3.045	0.460338	0.225725	0.343341	0.712851	0.0457095	0.197042	0.346209	0.157635	0.444455	-1.09645	0.122462	0.405167	-0.617405	0.424794	0.855775	-0.332784	0.705866	1	-2.8827	3.91648e-10	6.83378e-09	-2.04431	7.12699e-06	5.24009e-05	-1.86409	5.04241e-05	0.000442966
Zm00001eb003140	4.67	3.47	1.515	1.575	1.625	0.57	1.045	0.83	0.345	0.001	0.555	0.385	-1.56807	0.0156773	0.0374792	-1.0945	0.24168	0.584062	-1.41028	0.289266	0.621032	-10.0293	0.125057	0.408229	-0.580624	1	1	0.158262	1	1	-10.6211	0.00955332	0.0358454	-1.54988	0.241361	0.42196	-0.566103	1	1
Zm00001eb003170	14.055	24.045	5.58	7.525	9.34	4.08	35.625	30.31	21.07	47.715	26.885	17.935	-0.90132	0.00429162	0.0122588	-1.36424	2.57074e-05	0.000412864	-0.451696	0.630695	0.899409	0.421553	0.0577691	0.250899	-0.172992	0.469005	0.887244	-0.232413	0.494696	0.944807	2.66468	1.03998e-22	5.41213e-21	1.52531	1.22111e-08	1.41163e-07	2.13614	1.42101e-05	0.000142788
Zm00001eb003180	99.86	34.145	23.795	23.85	23.37	12.64	34.13	20.985	35.6	22.7	34.17	46.495	-2.06592	1.45779e-18	4.84419e-17	-0.547017	0.0664902	0.256793	-0.912662	0.0333676	0.166269	-0.588348	0.137132	0.431088	0.703372	0.0238232	0.158392	0.385198	0.10855	0.493409	-0.071297	0.967838	1	0.548073	0.016234	0.0496777	1.87908	2.67918e-07	3.73765e-06
Zm00001eb003190	16.165	19.865	31.545	26.845	26.775	32.43	88.88	75.66	89.305	57.38	60.045	69.03	0.73178	0.00585665	0.0159946	0.430658	0.052969	0.219303	0.0399177	0.370627	0.708156	-0.631311	0.0318453	0.166633	-0.333487	0.134363	0.487226	-0.371517	0.08322	0.425594	1.09589	1.30122e-06	1.32243e-05	1.16516	7.59501e-09	9.0174e-08	1.08989	0.000580316	0.00373383
Zm00001eb003200	4.31	9.605	11.705	5.95	8.07	14.945	5.4	6.3	7.335	8.625	8.85	7.45	0.465202	0.296457	0.423776	-0.251217	0.719646	0.962348	0.352538	0.131612	0.398253	0.675565	0.0866749	0.325752	0.490326	0.376145	0.813746	0.0224435	1	1	0.535635	0.146203	0.312132	0.133109	0.739766	0.880807	-1.00435	0.0073386	0.0314707
Zm00001eb003210	1.255	5.105	8.945	4.86	6.35	7.865	5.985	9.6	7.36	5.74	8.49	6.97	1.95327	0.00149896	0.00485589	0.314846	0.452929	0.800687	-0.185635	1	1	-0.0603005	0.900446	1	-0.17727	0.655306	0.991169	-0.0785471	0.901212	1	0.240094	0.550921	0.75992	0.419008	0.201978	0.372191	-0.174288	0.550912	0.770946
Zm00001eb003220	0.325	0.415	0.305	0.001	0.001	0.001	3.885	4.225	1.815	1.815	1.245	0.6	-8.3443	0.505342	0.636194	-8.69697	0.503545	0.834965	-8.25267	1	1	-1.09795	0.113227	0.385206	-1.76281	0.0147586	0.111844	-1.59694	0.192314	0.657187	10.8258	0.00468423	0.0196146	10.2819	0.035853	0.096418	9.22882	0.510444	0.740573
Zm00001eb003270	0.001	0.001	0.001	0.001	0.001	0.001	8.04	25.89	12.5	8.035	22.12	13.195	0	1	1	0	1	1	0	1	1	-0.000897478	0.747668	0.982361	-0.227044	0.411563	0.843911	0.0780633	0.861157	1	12.9721	1.43989e-11	2.97187e-10	14.4331	1.17772e-25	6.39862e-24	13.6877	1.1707e-12	3.73195e-11
Zm00001eb003280	0.001	0.001	0.001	0.001	0.001	0.001	4.65	12.72	6.875	4.505	12.36	5.59	0	1	1	0	1	1	0	1	1	-0.0457036	1	1	-0.0414199	0.930862	1	-0.298511	0.526179	0.954027	12.1373	7.00459e-07	7.47967e-06	13.5934	7.24296e-16	1.89087e-14	12.4486	3.05124e-06	3.50985e-05
Zm00001eb003320	1.995	8.13	4.995	7.9	8.675	5.235	4.29	2.42	5.025	3.715	3.315	7.05	1.98546	1.96323e-05	9.82554e-05	0.0936084	0.686144	0.944785	0.0677049	0.784458	0.984023	-0.207615	1	1	0.454002	0.677905	1	0.4885	0.351436	0.843646	-1.08849	0.0308313	0.0940588	-1.38785	0.00228132	0.00918044	0.429434	0.653618	0.847691
Zm00001eb003350	78.895	42.945	47.26	35.51	36.455	35.485	41.17	36.53	46.28	29.575	35.5	48.865	-1.15171	3.01233e-08	2.52652e-07	-0.236373	0.551242	0.867864	-0.41341	0.411325	0.745818	-0.477215	0.150584	0.456207	-0.0412627	0.791783	1	0.0784126	0.754078	1	-0.263847	0.517223	0.73252	-0.0382977	0.939615	1	0.461592	0.265106	0.488369
Zm00001eb003360	6.81	7.485	5.2	24.34	11.035	4.615	13.205	7.19	5.74	28.17	14.685	13.47	1.8376	4.33612e-10	4.83979e-09	0.560012	0.0866892	0.307729	-0.172181	1	1	1.09308	5.09002e-05	0.000890287	1.03028	0.00547068	0.0526866	1.23063	0.00146092	0.0239698	0.21083	0.21456	0.41272	0.412257	0.119861	0.251448	1.54535	0.0024282	0.0126141
Zm00001eb003370	0.001	0.001	0.001	0.001	0.001	0.001	20.185	19.565	28.055	15.145	13.365	18.505	0	1	1	0	1	1	0	1	1	-0.414442	0.365754	0.739275	-0.549815	0.0834563	0.366241	-0.600343	0.0453621	0.291418	13.8866	4.27732e-19	1.77661e-17	13.7062	1.20011e-17	3.6779e-16	14.1756	3.34895e-14	1.27711e-12
Zm00001eb003420	56.28	71.7	48.875	40.305	44.555	29.03	49.59	30	54.61	27.885	44.94	65.625	-0.481664	0.0131472	0.0322386	-0.686386	0.0149444	0.0862845	-0.751552	0.0426414	0.194134	-0.83056	0.00568428	0.0463559	0.583038	0.0318019	0.19398	0.26508	0.330971	0.822427	-0.53147	0.0896652	0.21644	0.0124128	0.761893	0.897228	1.1767	0.00157631	0.00879443
Zm00001eb003440	1.27	6.465	2.875	12.82	35.385	4.61	2.115	19.29	3.755	27.385	36.42	9.21	3.3355	9.71531e-14	1.789e-12	2.45242	1.67198e-15	1.59063e-13	0.681205	0.201187	0.512249	3.69466	4.62438e-20	8.96749e-18	0.916878	0.000694026	0.00998755	1.29439	0.0102227	0.105244	1.09499	1.78866e-05	0.00014547	0.041593	0.683303	0.839438	0.998434	0.105418	0.253655
Zm00001eb003450	0.18	0.9	0.625	1.955	1.65	0.26	7.22	14.235	12.19	10.46	5.425	5.93	3.4411	0.00763777	0.0202012	0.874469	0.409273	0.764074	-1.26534	1	1	0.534812	0.104681	0.366711	-1.39175	0.000341818	0.00556383	-1.03959	0.0098149	0.102131	2.41964	4.47818e-07	4.96835e-06	1.71716	0.00196541	0.00810024	4.51145	2.80628e-05	0.000263892
Zm00001eb003460	3.395	3.83	3.835	14.46	14.29	15.55	3.02	4.62	4.82	9.775	5.06	6.12	2.09058	3.40362e-07	2.38045e-06	1.89959	4.73908e-06	9.1704e-05	2.01962	4.38974e-05	0.000892924	1.69455	0.000201126	0.00291644	0.131245	1	1	0.344499	0.474358	0.93416	-0.564899	0.232049	0.436351	-1.4978	0.000169902	0.000922338	-1.34531	0.00355765	0.0172837
Zm00001eb003470	0.2	0.001	0.001	1.34	3.01	1.53	0.915	4.21	0.001	0.69	14.415	2.055	2.74416	0.0439138	0.0896665	11.5555	0.000337716	0.00387345	10.5793	0.0312984	0.158634	-0.407175	1	1	1.77568	0.000131068	0.00247483	11.0049	0.00785874	0.0867677	-0.957565	0.75892	0.910697	2.25974	1.51781e-07	1.50628e-06	0.425607	1	1
Zm00001eb003490	41.005	53.455	42.165	99.315	68.415	52.345	53.93	63.54	61.845	64.095	93.375	66.865	1.27621	3.23502e-09	3.1432e-08	0.355988	0.0652441	0.254005	0.312006	0.063753	0.253729	0.249124	0.103245	0.363426	0.555371	0.0273149	0.175004	0.112594	0.669767	1	-0.6318	0.0220046	0.0713854	0.448724	0.0111121	0.036025	0.3532	0.517798	0.742685
Zm00001eb003540	22.665	32.57	28.105	33.715	30.57	16.23	48.045	35.98	55.56	64.89	53.555	56.105	0.572924	0.017729	0.0415905	-0.0914272	1	1	-0.792164	0.0430771	0.195555	0.43361	0.0118939	0.0814139	0.573826	0.0213955	0.146896	0.0140827	0.977646	1	0.944606	5.39016e-06	4.88573e-05	0.808905	7.46721e-05	0.000437083	1.78947	6.69815e-08	1.04659e-06
Zm00001eb003580	10.26	10.44	8.975	10.795	8.975	8.275	25.49	14.79	18.945	21.9	16.77	21.175	0.0733325	0.944622	0.996693	-0.218138	0.779607	0.98784	-0.117153	0.910312	1	-0.219001	0.803355	1	0.181261	0.638083	0.982175	0.160545	0.63362	1	1.02057	0.000301288	0.00181023	0.901899	0.00134884	0.00579542	1.35553	0.00310387	0.0154355
Zm00001eb003620	2.195	4.73	2.955	4.99	2.985	1.16	0.9	0.001	0.52	0.001	0.745	0.56	1.18482	0.0278758	0.0611279	-0.664109	0.376906	0.73286	-1.34903	0.210492	0.525971	-9.81378	0.125057	0.408229	9.5411	0.250056	0.673115	0.106915	1	1	-12.2848	3.32313e-07	3.79387e-06	-2.00242	0.0282478	0.0791276	-1.05063	0.48428	0.718137
Zm00001eb003630	1.89	5.785	3.685	5.15	4.05	1.42	2.9	1.865	3.63	2.655	2.725	3.025	1.44619	0.00746041	0.0198084	-0.514395	0.411282	0.76592	-1.37577	0.115692	0.371353	-0.127341	1	1	0.547081	0.652219	0.989024	-0.263034	0.717919	1	-0.955861	0.148241	0.315331	-0.571666	0.417244	0.614707	1.09104	0.276211	0.502233
Zm00001eb003640	0.001	0.001	1.83	0.001	0.001	3.62	2.42	6.155	3.92	2.64	2.38	0.001	0	1	1	0	1	1	0.984146	0.195537	0.504885	0.125531	0.921227	1	-1.3708	0.0553208	0.283469	-11.9366	0.00731645	0.0824897	11.3663	0.0115697	0.0420485	11.2167	0.00956837	0.0316883	-11.8218	0.000201503	0.00149534
Zm00001eb003650	7.75	8.315	6.055	27.155	19.29	3.885	4.52	3.15	3.59	11.605	8.205	6.65	1.80895	6.40569e-09	5.95009e-08	1.21406	5.37362e-05	0.00079736	-0.640212	0.445381	0.776691	1.36035	0.000208151	0.00300656	1.38115	0.011888	0.0955882	0.88937	0.114743	0.508759	-1.22647	0.000146483	0.000962247	-1.23328	7.75268e-05	0.000452803	0.77544	0.363223	0.602084
Zm00001eb003660	4.65	22.985	2.63	1.2	1.99	0.001	7.255	0.805	3.74	0.39	1.695	0.001	-1.9542	0.00218026	0.00675461	-3.52985	7.29472e-07	1.67261e-05	-11.3608	0.00196222	0.0200146	-4.21743	5.5408e-06	0.000122743	1.07422	0.343935	0.781087	-11.8688	0.000112798	0.00293342	-1.62149	0.308609	0.530466	-0.231483	1	1	0	1	1
Zm00001eb003670	10.665	23.285	22.475	27.015	24.14	22.42	24.595	24.28	22.55	24.67	23	22.61	1.34088	1.19768e-06	7.53794e-06	0.0520248	0.661869	0.93076	-0.00353484	0.521687	0.829127	0.00439266	0.651176	0.93497	-0.0781346	0.713418	1	0.00383356	1	1	-0.131003	0.927588	1	-0.0697918	1	1	0.0121747	0.6779	0.865146
Zm00001eb003700	9.995	14.46	22.41	12.525	79.52	102.485	20.24	51.62	51.255	19.83	55.935	30.755	0.325532	0.44867	0.583396	2.45925	3.8967e-16	4.21262e-14	2.1932	5.3007e-08	2.78378e-06	-0.0295246	0.807027	1	0.115821	0.801926	1	-0.736872	0.0137562	0.130255	0.662874	0.0559945	0.150896	-0.507566	0.0700235	0.164582	-1.73652	3.35446e-08	5.47115e-07
Zm00001eb003730	2067.61	6238.3	3255.22	1731.64	3858.48	1118.83	1849.24	4517.6	2079.61	1516.04	2656.39	770.78	-0.255824	0.249245	0.371345	-0.693119	0.00297286	0.0240206	-1.54076	4.8352e-08	2.56e-06	-0.286625	0.627192	0.924174	-0.766091	0.000123189	0.00235332	-1.43192	0.000111221	0.00289533	-0.191835	0.676175	0.85225	-0.538568	0.00406789	0.0152177	-0.5376	0.0469681	0.138265
Zm00001eb003760	3.835	8.405	7.595	5.525	11.795	15.075	13.25	33.685	35.89	14.21	39.595	39.735	0.526748	0.295369	0.422634	0.488856	0.128772	0.398863	0.989036	0.00151235	0.0164507	0.100914	0.50967	0.853245	0.233212	0.381871	0.818559	0.146828	0.557676	0.970002	1.36286	0.000187482	0.0011929	1.74714	1.33368e-13	2.83963e-12	1.39825	4.56687e-05	0.000405068
Zm00001eb003790	0.001	0.001	0.001	0.001	0.001	0.001	5.175	6.02	4.695	3.465	4.975	7.85	0	1	1	0	1	1	0	1	1	-0.578704	0.451755	0.814955	-0.275067	0.549367	0.931591	0.741567	0.146093	0.574586	11.7586	1.33518e-05	0.000112063	12.2805	5.13439e-08	5.44436e-07	12.9385	2.25697e-08	3.79748e-07
Zm00001eb003800	0.001	0.001	0.001	0.001	0.001	0.001	13.27	15.28	12.73	13.175	12.37	13.05	0	1	1	0	1	1	0	1	1	-0.0103654	0.697742	0.958171	-0.304799	0.339551	0.777429	0.0358174	1	1	13.6855	1.17497e-17	4.33508e-16	13.5946	1.82704e-17	5.51716e-16	13.6718	2.13564e-12	6.57184e-11
Zm00001eb003860	1.815	1.215	0.895	0.2	1.33	0.835	0.655	2.07	0.545	1.58	2.62	1.255	-3.1819	0.0045323	0.0128481	0.13047	1	1	-0.100111	1	1	1.27036	0.343938	0.716411	0.339936	0.814655	1	1.20336	0.455179	0.924102	2.98185	0.0436197	0.123692	0.978141	0.269598	0.456308	0.587839	1	1
Zm00001eb003880	37.505	10.95	12.675	8.56	9.375	8.64	14.665	17.15	14.145	15.77	15.395	12.415	-2.1314	2.8955e-14	5.73514e-13	-0.22404	0.787587	0.991417	-0.552883	0.359559	0.696426	0.104806	0.435367	0.801602	-0.155747	0.591349	0.959338	-0.188208	0.604639	0.992336	0.8815	0.00253333	0.0115638	0.715571	0.0119296	0.038332	0.522981	0.420891	0.659157
Zm00001eb003910	3.275	1.745	0.92	0.98	1.38	0.29	0.42	0.615	0.001	0.57	1	0.71	-1.74064	0.00925036	0.0238406	-0.338559	0.800009	0.996171	-1.66558	0.625077	0.898014	0.440573	1	1	0.701342	0.68757	1	9.47168	0.261564	0.752162	-0.78182	0.739941	0.897301	-0.464668	0.775704	0.9068	1.29177	0.652364	0.847171
Zm00001eb003950	0.001	0.001	0.001	0.28	0.295	0.001	2.135	2.185	0.79	3.565	1.785	2.28	8.12928	0.504732	0.636194	8.20457	1	1	0	1	1	0.739666	0.194051	0.532293	-0.291709	0.807229	1	1.52911	0.158212	0.601117	3.6704	0.000349545	0.00205811	2.59714	0.0273571	0.0769869	11.1548	0.00561336	0.0253185
Zm00001eb003970	12.66	12.465	14.055	10.145	8.67	7.135	11.33	7.885	12.365	4.605	7.93	9.995	-0.319509	0.272977	0.397444	-0.523779	0.24845	0.592987	-0.978098	0.0365059	0.175586	-1.29887	0.00354285	0.0318881	0.00821011	1	1	-0.306984	0.398778	0.878288	-1.1395	0.0122532	0.0441725	-0.128711	0.921015	0.996179	0.486293	0.494507	0.727065
Zm00001eb003990	1.24	5.415	4.385	5.02	3.31	3.52	4.425	3.43	2.42	1.34	2.265	2.6	2.01735	0.000722518	0.00253031	-0.71013	0.228319	0.56549	-0.317001	1	1	-1.72344	0.018131	0.111484	-0.598698	0.543121	0.929821	0.103505	1	1	-1.90545	0.00561207	0.0228004	-0.54732	0.579796	0.761416	-0.437064	0.511694	0.74144
Zm00001eb004050	6.205	6.285	7.14	1.955	2.24	3.86	4.815	15.21	5.085	0.86	3.72	2.665	-1.66626	0.00319849	0.00946248	-1.48841	0.00800768	0.0525674	-0.887323	0.184625	0.4884	-2.48513	0.00155844	0.0161532	-2.03165	1.62104e-06	5.43318e-05	-0.932112	0.160577	0.60532	-1.18476	0.320501	0.54298	0.731804	0.220068	0.39578	-0.534465	0.293866	0.522791
Zm00001eb004060	0.001	0.001	0.001	0.001	0.001	0.001	0.001	4.875	0.825	1.01	1.845	1.125	0	1	1	0	1	1	0	1	1	9.98014	0.0786945	0.30644	-1.40178	0.0434788	0.241327	0.447459	1	1	9.98014	0.0869722	0.211704	10.8494	0.00407958	0.0152529	10.1357	0.172221	0.362643
Zm00001eb004100	2.63	15.285	11.105	7.87	2.625	0.001	27.735	0.001	0.001	28.065	1.68	0.33	1.5813	0.0352976	0.0745798	-2.54173	7.02836e-06	0.000129399	-13.4389	1.48107e-10	1.56456e-08	0.0170643	0.88871	1	10.7142	0.0156496	0.116097	8.36632	1	1	1.83434	3.25588e-05	0.000249859	-0.643856	0.561553	0.745823	8.36632	1	1
Zm00001eb004110	50.155	15.36	11.155	7.91	2.64	0.001	71.325	89.205	72.79	28.205	1.685	0.33	-2.66464	5.47582e-19	1.91947e-17	-2.54057	5.76241e-06	0.000108536	-13.4454	1.50684e-10	1.57951e-08	-1.33846	0.00220684	0.0216069	-5.7263	3.5962e-38	5.8609e-35	-7.78513	4.17773e-28	5.42144e-25	1.8342	2.94363e-05	0.00022823	-0.647789	0.561521	0.745823	8.36632	1	1
Zm00001eb004180	11.175	11.225	13.075	19.345	20.05	25.54	4.495	10.27	6.025	7.575	6.425	5.32	0.791686	0.0229278	0.051769	0.836887	0.00217286	0.0184746	0.965948	0.000980549	0.0116124	0.752925	0.0461524	0.214884	-0.676668	0.0734442	0.337349	-0.179535	0.780408	1	-1.35264	0.0001136	0.000767154	-1.64183	3.15891e-07	2.95948e-06	-2.26326	1.90994e-08	3.26938e-07
Zm00001eb004200	2.07	3.355	3.945	5.145	6.605	7.085	0.001	2.19	1.815	1.68	1.94	1.715	1.31354	0.0172448	0.0406222	0.977246	0.0487748	0.207151	0.844743	0.0294672	0.152931	10.7142	0.00868647	0.0639246	-0.174874	0.803737	1	-0.081761	1	1	-1.61471	0.0211448	0.0691106	-1.7675	0.00176484	0.00736199	-2.04656	0.000384595	0.00261753
Zm00001eb004260	8.52	4.48	2.92	1.245	3.035	0.675	1.58	0.001	2.005	0.325	1.39	0.295	-2.77471	1.89949e-06	1.15108e-05	-0.561802	0.450056	0.798207	-2.11301	0.0575498	0.239179	-2.28141	0.0796431	0.308746	10.4409	0.0312852	0.19159	-2.76482	0.0412604	0.274497	-1.93763	0.304789	0.526019	-1.12661	0.139547	0.282182	-1.19417	0.639933	0.837754
Zm00001eb004270	0.001	0.94	0.001	11.295	11.1	0.655	3.615	2.635	2.31	7.175	6.29	6.12	13.4634	7.35094e-14	1.37489e-12	3.56176	1.97171e-09	7.77716e-08	9.35535	0.254882	0.581783	0.988983	0.0291941	0.157297	1.25526	0.0360449	0.212228	1.40564	0.0382096	0.262422	-0.654634	0.194157	0.384249	-0.819428	0.0347669	0.0939525	3.22396	0.0013642	0.00779497
Zm00001eb004320	11.705	17.845	15.035	10.395	9.255	4.01	10.13	6.895	11.145	4.145	5.85	5.095	-0.171235	0.553432	0.680549	-0.947215	0.00823371	0.0536648	-1.90665	9.02848e-05	0.00161865	-1.28919	0.0151345	0.0978285	-0.237114	0.694916	1	-1.12924	0.0117291	0.116146	-1.32645	0.00708589	0.0278286	-0.661796	0.113453	0.241025	0.34548	0.788978	0.939473
Zm00001eb004360	1.48	3.02	1.1	2.64	2.09	2.815	0.001	0.001	0.001	0.001	0.001	0.001	0.834941	0.336375	0.467564	-0.531046	0.697012	0.950246	1.35563	0.0792969	0.290994	0	1	1	0	1	1	0	1	1	-11.3663	0.000976627	0.00510729	-11.0293	0.00277341	0.0108955	-11.4589	0.000851588	0.00521451
Zm00001eb004370	69.565	35.185	37.425	30.175	26.925	32.595	23.57	24.975	21.96	20.065	18.485	21.735	-1.20501	9.97158e-09	9.0192e-08	-0.386014	0.234619	0.574944	-0.199352	1	1	-0.232271	0.776986	0.994496	-0.43413	0.100178	0.410136	-0.014858	1	1	-0.588673	0.0517121	0.141741	-0.542591	0.0437981	0.113379	-0.584631	0.0175983	0.06416
Zm00001eb004380	37.245	57.045	57.21	48.37	21.51	57.835	51.805	18.165	30.605	15.875	53.6	71.21	0.377066	0.841758	0.917705	-1.40709	0.208301	0.535905	0.0156755	0.539905	0.842078	-1.70633	0.109857	0.378047	1.56107	2.16285e-06	7.00602e-05	1.21831	0.000291317	0.00646225	-1.60736	0.406076	0.630859	1.31723	0.192263	0.358869	0.300137	0.697413	0.878842
Zm00001eb004440	38.065	44.805	32.045	23.32	38.565	22.795	43.13	98.705	61.585	24.48	48	45.41	-0.706897	0.00250566	0.00762117	-0.216368	0.661509	0.930652	-0.491382	0.339256	0.678146	-0.817088	0.00822216	0.0612889	-1.04009	6.13323e-06	0.000175747	-0.439569	0.0516904	0.318393	0.0700358	0.552338	0.761101	0.315742	0.0901309	0.201163	0.994293	0.00940204	0.038615
Zm00001eb004470	0.001	0.001	0.001	3.92	3.565	0.995	0.001	0.001	0.001	3.34	1.565	0.001	11.9366	3.28658e-06	1.90861e-05	11.7997	5.99788e-05	0.00087565	9.95855	0.125077	0.385348	11.7056	3.07983e-05	0.00057123	10.6119	0.0312852	0.19159	0	1	1	-0.231006	0.883741	0.980018	-1.18774	0.104969	0.227017	-9.95855	0.138493	0.310945
Zm00001eb004480	9.73	4.27	3.415	3.85	3.915	3.28	4.61	6.21	5.11	5.875	5.85	7.94	-1.33758	0.000406836	0.00151385	-0.125224	1	1	-0.0581898	1	1	0.349822	0.345224	0.717593	-0.0861566	0.89215	1	0.635816	0.189517	0.653565	0.60973	0.148497	0.315676	0.579424	0.189666	0.355632	1.27544	0.0376188	0.117129
Zm00001eb004490	71.8	60.73	60.295	67.455	43.8	55.9	114.925	176.235	70.07	175.565	92.21	55.005	-0.0900585	0.626419	0.745784	-0.471478	0.1806	0.493612	-0.10919	0.765333	0.975336	0.611313	0.00346529	0.0312876	-0.934505	0.000807807	0.0112755	-0.349234	0.126225	0.536704	1.38001	9.67458e-10	1.58375e-08	1.07399	1.18719e-05	8.26587e-05	-0.0232855	0.562551	0.780438
Zm00001eb004540	4.225	5.92	4.95	6.46	5.715	3.325	1.715	1.195	1.12	0.95	1.135	0.755	0.612583	0.173358	0.277652	-0.0508437	1	1	-0.574074	0.597226	0.881729	-0.852209	0.549	0.877462	-0.0743183	1	1	-0.56895	0.73558	1	-2.76553	3.79633e-05	0.000287183	-2.33206	0.000339722	0.00169861	-2.13881	0.0241239	0.0823137
Zm00001eb004590	11.225	8.565	10.685	12.01	10.515	6.62	4.585	2.655	3.865	4.445	5.545	5.145	0.0975207	0.888368	0.952031	0.295924	0.308065	0.66304	-0.690684	0.215577	0.533507	-0.0447383	1	1	1.06248	0.0875761	0.378586	0.412703	0.526998	0.954027	-1.43398	0.000653424	0.00359165	-0.923189	0.027658	0.0776702	-0.36366	0.382391	0.621415
Zm00001eb004630	24.19	21.24	21.96	173.24	44.61	44.47	24.885	16.505	18.525	101.395	82.655	50.91	2.84029	2.68104e-22	1.29287e-20	1.07058	5.84058e-05	0.00085651	1.01795	6.02822e-06	0.000164611	2.02664	2.23064e-12	1.75115e-10	2.3242	7.51345e-16	1.44059e-13	1.45848	7.78313e-06	0.000309347	-0.772786	0.0128715	0.0461466	0.889735	5.36132e-05	0.000325261	0.195117	0.926943	1
Zm00001eb004650	0.735	2.94	3.145	3.29	3.07	0.785	0.69	0.001	1.315	1.44	0.75	1.53	2.16227	0.00633179	0.0171261	0.0624225	0.864842	1	-2.0023	0.035294	0.171721	1.0614	0.368628	0.742657	9.55075	0.253292	0.675122	0.218469	1	1	-1.19202	0.214848	0.413123	-2.03328	0.0323058	0.0883059	0.962767	0.528663	0.752318
Zm00001eb004660	495.29	142.77	71.425	99.52	123.2	96.49	163.62	221.51	149.965	163.655	303.99	166.105	-2.31522	2.53836e-31	2.82838e-29	-0.212691	0.579367	0.885518	0.43395	0.0181389	0.107265	0.000308574	0.513397	0.855213	0.456652	0.0501329	0.265394	0.14747	0.556704	0.969829	0.717599	0.000216337	0.00135393	1.30302	5.15927e-12	9.0203e-11	0.783644	0.0259338	0.0872259
Zm00001eb004700	0.001	0.001	0.001	0.001	0.001	0.001	12.13	12.355	12.62	12.465	14.56	13.145	0	1	1	0	1	1	0	1	1	0.0393033	0.679503	0.950112	0.236915	0.603235	0.966486	0.0588022	0.93104	1	13.6056	7.71847e-17	2.66058e-15	13.8297	3.03275e-20	1.11125e-18	13.6822	1.84168e-12	5.70021e-11
Zm00001eb004720	17.315	2.57	1.31	1.46	2.98	0.28	2.515	2.44	4.74	1.73	0.71	1.62	-3.56798	3.056e-15	6.82195e-14	0.213544	0.716887	0.96031	-2.22607	0.219973	0.537547	-0.539786	0.677577	0.949273	-1.78099	0.251998	0.674251	-1.54889	0.0450034	0.289831	0.244804	0.837396	0.953983	-2.06942	0.0312939	0.08602	2.5325	0.154591	0.334871
Zm00001eb004730	42.115	80.365	24.135	29.325	24.52	4.24	40.51	27.335	29.935	15.91	28.12	14.695	-0.522203	0.0112374	0.0281796	-1.71261	3.39147e-07	8.38636e-06	-2.50899	1.61671e-09	1.33e-07	-1.34834	0.00215307	0.0211122	0.0408472	0.976658	1	-1.02651	0.0484415	0.304493	-0.882197	0.0455344	0.127753	0.197638	0.359491	0.555431	1.79319	0.0152947	0.057247
Zm00001eb004750	6	2.765	3.3	7.235	4.365	1.17	0.865	0.785	1.665	0.935	0.65	0.001	0.270031	0.608751	0.729693	0.658702	0.332902	0.690015	-1.49596	0.143814	0.419736	0.112266	1	1	-0.272253	1	1	-10.7013	0.0179781	0.156003	-2.95195	4.93648e-05	0.000363073	-2.74747	0.000249105	0.0012971	-10.1923	0.0749279	0.197801
Zm00001eb004780	23.56	19.78	19.22	11.485	14.135	15.34	26.96	20.695	26.76	13.905	12.935	25.62	-1.03659	0.000171644	0.000701937	-0.484771	0.162854	0.463268	-0.32531	0.722793	0.956317	-0.955217	0.00378961	0.033643	-0.678002	0.0222621	0.150859	-0.0628076	0.870103	1	0.275853	0.261538	0.474171	-0.127992	0.88083	0.970874	0.739972	0.0725702	0.193781
Zm00001eb004940	40.93	18.195	27.805	18.02	18.69	21.125	17.65	18.375	20.01	15.765	16.575	20.615	-1.18356	3.63955e-07	2.52789e-06	0.0387245	0.71465	0.959514	-0.396393	0.475707	0.800678	-0.162943	1	1	-0.148735	0.613912	0.969381	0.0429733	0.8966	1	-0.192874	0.758973	0.910714	-0.173258	0.702106	0.853182	-0.0352569	0.554948	0.774309
Zm00001eb005030	7.97	20.65	13.65	19.85	17.215	5.93	18.665	15.75	17.17	11.995	15.025	14.865	1.31649	1.17857e-05	6.16722e-05	-0.262476	0.545017	0.863642	-1.2028	0.00955437	0.0669475	-0.637902	0.233798	0.589944	-0.0679868	0.821653	1	-0.207971	0.55989	0.970917	-0.726706	0.0789014	0.196603	-0.196301	0.63389	0.80293	1.32582	0.00776448	0.0328891
Zm00001eb005050	6.42	1.21	1.91	3.18	2.4	2.015	0.745	0.001	0.001	0.58	0.001	0.001	-1.01355	0.0253262	0.0563342	0.988027	0.216747	0.548782	0.0772072	0.803781	0.990947	-0.361188	1	1	0	1	1	0	1	1	-2.4549	0.0118268	0.0428375	-11.2288	0.000517344	0.00248042	-10.9766	0.00633095	0.0278219
Zm00001eb005060	14.045	12.855	19.275	13.085	11.81	14.78	6.675	5.42	3.62	5.79	3.075	3.265	-0.102143	0.661489	0.775166	-0.122321	1	1	-0.383085	0.569862	0.863446	-0.205204	1	1	-0.817706	0.203922	0.612725	-0.148907	0.852855	1	-1.17628	0.00265737	0.0120376	-1.94135	6.8275e-06	5.03926e-05	-2.17849	5.76486e-07	7.64188e-06
Zm00001eb005100	43.79	20.985	57.65	17.135	7.915	15.095	2.945	0.001	4.125	0.73	0.6	1.97	-1.35366	8.32314e-05	0.000365122	-1.4067	0.00830769	0.053999	-1.93325	1.01278e-08	6.75595e-07	-2.0123	0.0352581	0.178312	9.22882	0.500038	0.902459	-1.0662	0.222189	0.701864	-4.55291	1.19887e-14	3.40429e-13	-3.72155	5.1366e-08	5.44455e-07	-2.9378	1.17075e-07	1.73998e-06
Zm00001eb005110	0.001	0.001	0.001	0.001	0.001	0.001	2.735	0.45	0.61	2.335	2.135	1.565	0	1	1	0	1	1	0	1	1	-0.228118	1	1	2.24624	0.0691248	0.32355	1.35928	0.39045	0.87279	11.1892	0.0102482	0.037947	11.06	0.00134524	0.00578183	10.6119	0.0779643	0.203145
Zm00001eb005120	15.755	9.585	12.305	7.33	5.135	6.465	10.725	10.78	9.475	5.66	6.955	7.48	-1.10392	0.000272572	0.00106068	-0.900414	0.0640151	0.250863	-0.928522	0.058007	0.240464	-0.922104	0.118989	0.39824	-0.632235	0.123881	0.467948	-0.341088	0.441071	0.913321	-0.373011	0.605038	0.800997	0.437686	0.250249	0.432586	0.210388	1	1
Zm00001eb005140	49.23	30.575	20.525	18.715	19.44	17.72	13.88	10.08	21.635	9.88	14.255	18.595	-1.39534	1.32952e-09	1.37332e-08	-0.653324	0.0290818	0.142209	-0.212004	1	1	-0.490425	0.433948	0.800394	0.499972	0.269486	0.694516	-0.218452	0.514017	0.948577	-0.921612	0.0232885	0.0748659	-0.44756	0.13964	0.282347	0.0695361	0.862888	0.98105
Zm00001eb005190	23.675	17.465	14.895	8.06	10.445	10.295	20.335	11.075	26.025	11.915	12.38	19.275	-1.55451	1.45182e-07	1.08648e-06	-0.741654	0.0406194	0.181552	-0.532884	0.449629	0.780642	-0.771186	0.0418457	0.20014	0.160705	0.785078	1	-0.433167	0.322208	0.814193	0.563927	0.0751391	0.189594	0.245199	0.376571	0.573799	0.904787	0.161067	0.345554
Zm00001eb005230	2.83	2.085	2.025	1.265	2.015	0.93	4.69	6.15	5.66	4.825	4.62	4.99	-1.16166	0.089979	0.163597	-0.0492675	1	1	-1.12262	0.549061	0.846985	0.040941	0.769497	0.992671	-0.412694	0.453452	0.875314	-0.181762	0.772314	1	1.93139	0.00153777	0.00748979	1.19711	0.031488	0.0864942	2.42374	0.00490097	0.0225933
Zm00001eb005250	0.001	0.001	0.001	3.84	3.045	0.001	0.001	0.001	0.001	3.12	18.96	2.17	11.9069	1.79208e-05	9.02937e-05	11.5722	0.000202138	0.00247813	0	1	1	11.6073	0.000110708	0.00174032	14.2107	1.2821e-17	3.18399e-15	11.0835	0.0039165	0.0508753	-0.29956	0.800258	0.934678	2.63844	6.62056e-12	1.13893e-10	11.0835	0.0106206	0.0427038
Zm00001eb005350	1.565	1.655	2.89	2.83	1.54	1.265	4.385	0.745	1.295	0.95	0.535	2.43	0.854639	0.189114	0.298167	-0.103901	1	1	-1.19193	0.210492	0.525971	-2.20658	0.00485064	0.0409236	-0.477702	1	1	0.908004	0.305174	0.79731	-1.5748	0.0731221	0.185608	-1.52532	0.23976	0.420252	0.941819	0.447432	0.684153
Zm00001eb005360	1.745	1.015	1.86	2.035	1.255	2.36	5.2	3.475	6.475	3.12	3.85	4.8	0.221802	1	1	0.306208	1	1	0.343484	0.629365	0.898995	-0.736966	0.347275	0.719545	0.147845	1	1	-0.431846	0.396078	0.876238	0.616517	0.356269	0.582081	1.61717	0.0106851	0.0348111	1.02425	0.18343	0.379639
Zm00001eb005390	34.28	24.07	27.87	20.88	18.64	23.575	6.215	5.91	6.215	5.33	5.485	5.155	-0.715245	0.0011273	0.00376962	-0.368834	0.334961	0.692255	-0.241455	0.919126	1	-0.221619	1	1	-0.107667	0.888059	1	-0.269782	0.678651	1	-1.96991	3.07438e-08	4.12627e-07	-1.76484	2.9688e-07	2.79505e-06	-2.19321	8.8054e-09	1.59227e-07
Zm00001eb005430	30.085	19.38	20.665	32.41	18.485	13.285	14.715	13.31	12.62	32.94	19.835	17.295	0.107395	0.758979	0.854165	-0.0682135	1	1	-0.637391	0.168903	0.464198	1.16255	9.9849e-07	2.65023e-05	0.575538	0.0803662	0.357677	0.454643	0.181458	0.640882	0.0234015	0.628156	0.81812	0.101693	0.542022	0.728685	0.380557	0.545757	0.767154
Zm00001eb005460	23.815	33.61	31.51	64.46	40.875	59.07	64.66	30.29	34.01	77.98	56.08	65.005	1.43653	1.24212e-07	9.41934e-07	0.282328	0.310231	0.665212	0.906616	1.71618e-05	0.000405211	0.270231	0.123243	0.406836	0.888645	0.000308129	0.00510468	0.934592	0.00109585	0.0190374	0.2747	0.199846	0.391567	0.456268	0.0112957	0.0365361	0.138125	0.971308	1
Zm00001eb005500	8.315	3.85	0.68	0.001	0.001	0.001	0.955	0.001	0.42	0.001	0.001	0.29	-13.0215	3.72817e-13	6.40986e-12	-11.9106	0.00013831	0.00180176	-9.40939	0.253473	0.580758	-9.89936	0.125057	0.408229	0	1	1	-0.534336	1	1	0	1	1	0	1	1	8.17991	1	1
Zm00001eb005530	42.24	62.915	72.875	118.9	117.375	162.48	47.975	42.47	51.9	77.39	50.335	55.9	1.49307	6.22242e-12	9.02682e-11	0.899649	3.53983e-05	0.000549282	1.15677	4.5575e-06	0.000130194	0.689864	0.000262364	0.0036516	0.245118	0.351404	0.788912	0.107114	0.671726	1	-0.61953	0.0169817	0.0579391	-1.22149	3.53863e-09	4.40234e-08	-1.53934	1.83474e-09	3.72233e-08
Zm00001eb005540	8.025	7.14	10.085	6.735	6.515	3.33	8.985	5.575	10.135	2.49	8.685	6.66	-0.252823	0.465398	0.599875	-0.132159	1	1	-1.59862	0.00217432	0.0216981	-1.85137	0.00752531	0.0576758	0.639554	0.279526	0.708806	-0.605752	0.300577	0.793205	-1.43553	0.0131748	0.047033	0.414761	0.256781	0.440466	1	0.258303	0.480503
Zm00001eb005600	2.695	6.32	4.605	4.075	5.645	0.315	4.41	5.23	2.925	1.555	4.255	2.985	0.596515	0.299466	0.427192	-0.162951	1	1	-3.86978	0.000146775	0.00242329	-1.50386	0.0291159	0.157064	-0.297652	0.549753	0.931909	0.0292943	1	1	-1.38989	0.0448275	0.126326	-0.407814	0.518479	0.707906	3.24431	0.0131765	0.0507352
Zm00001eb005660	104.34	45.545	47.525	39.355	33.74	32.835	48.105	27.145	45.05	26.405	35.785	44.63	-1.40667	1.18343e-10	1.43067e-09	-0.432833	0.158684	0.45568	-0.533452	0.20523	0.519186	-0.865376	0.00207657	0.0204936	0.398668	0.139687	0.49781	-0.0135133	0.971218	1	-0.575736	0.0604335	0.160355	0.084895	0.535355	0.722284	0.442779	0.338503	0.575074
Zm00001eb005680	12.57	42.14	26.795	28.7	50.875	31.19	45.23	41.215	64.23	41.01	66.705	65.205	1.19107	4.17116e-05	0.000195109	0.271767	0.163768	0.464999	0.21912	0.19883	0.509224	-0.141304	1	1	0.694625	0.0087782	0.0757949	0.0217353	0.968683	1	0.514925	0.0343838	0.102901	0.390838	0.0311533	0.0857156	1.0639	0.00502952	0.023086
Zm00001eb005760	1.565	3.72	5.51	1.535	1.91	2.505	3.82	9.915	4.835	2.73	5.63	4.87	-0.027924	1	1	-0.96173	0.247571	0.591611	-1.13724	0.150264	0.431298	-0.484672	0.711962	0.965301	-0.816478	0.0964651	0.401228	0.0104059	1	1	0.830662	0.220011	0.420603	1.55956	0.00338793	0.01296	0.959111	0.252483	0.473014
Zm00001eb005780	0.87	2.025	2.505	3.35	7.82	5.355	3.535	5.385	2.115	11.165	10.95	5.675	1.94507	0.0137812	0.0335686	1.94925	0.000166678	0.00210761	1.09608	0.0297057	0.153769	1.6592	0.000140565	0.00213351	1.02391	0.176246	0.566963	1.42396	0.132547	0.546487	1.73675	0.000106321	0.000722007	0.48569	0.408339	0.605545	0.0837338	1	1
Zm00001eb005790	1.84	1.375	1.705	2.485	5.305	3.63	2.265	3.605	0.615	0.001	1.035	0.405	0.43354	0.587541	0.711336	1.94792	0.00147128	0.0133051	1.0902	0.0786746	0.289475	-11.1453	0.00195985	0.0195046	-1.80037	0.0394167	0.225352	-0.602665	1	1	-11.279	0.000650557	0.00358061	-2.35772	0.000528345	0.00252322	-3.16398	0.00106604	0.00629595
Zm00001eb005810	1.45	3.61	1.915	1.975	3.66	2.2	4.59	4.94	4.075	0.98	2.73	2.355	0.4458	0.676477	0.788039	0.0198448	1	1	0.200159	0.813488	0.995534	-2.22764	0.00267008	0.0253034	-0.85561	0.154355	0.525177	-0.791073	0.235417	0.719504	-1.011	0.317166	0.539283	-0.422943	0.605434	0.781583	0.0982235	1	1
Zm00001eb005840	26.5	11.18	8.95	9.475	7.97	5.4	12.785	9.31	13.04	11.495	15.195	18.505	-1.48379	5.50593e-08	4.42655e-07	-0.488269	0.29823	0.652658	-0.728928	0.251659	0.578846	-0.153446	1	1	0.706744	0.0623283	0.30505	0.504971	0.101949	0.475787	0.278809	0.338144	0.562641	0.930945	0.00229842	0.00923539	1.77688	0.000121535	0.000961659
Zm00001eb005850	19.55	23.56	22.095	30.97	45.71	88.355	15.7	21.425	23.52	12.565	14.74	13.3	0.663703	0.0113622	0.0284626	0.95617	0.000167119	0.00210961	1.99959	9.90669e-10	8.55596e-08	-0.321354	0.720962	0.970338	-0.539559	0.161761	0.539465	-0.822462	0.0101088	0.104403	-1.30146	1.31527e-05	0.000110531	-1.63277	3.3388e-11	5.32003e-10	-2.73189	3.09771e-14	1.18832e-12
Zm00001eb005860	0.325	4.125	0.755	0.9	0.73	0.001	2.23	1.79	2.55	2.235	5.285	2.87	1.46949	0.465328	0.599873	-2.49843	0.00377674	0.0291123	-9.56033	0.250077	0.576127	0.00323112	1	1	1.56194	0.0242708	0.160509	0.170553	0.835376	1	1.31228	0.136047	0.295888	2.85594	4.86412e-05	0.000298409	11.4868	0.00181133	0.00982953
Zm00001eb005900	8.425	7.8	7.86	15.9	21	18.865	10.885	12.68	13.535	20.235	20.64	14.46	0.916278	0.00346076	0.0101489	1.42884	2.3255e-06	4.81594e-05	1.26311	3.87882e-05	0.00080991	0.894511	0.00160795	0.0165538	0.702888	0.0391594	0.224471	0.0953727	0.811008	1	0.347826	0.123653	0.276485	-0.0249464	0.954671	1	-0.383645	0.140726	0.313776
Zm00001eb005920	30.115	39.715	50.75	64.835	55.62	64.51	64.285	41.015	57.9	97.6	72.925	95.345	1.10629	2.01087e-07	1.46793e-06	0.48592	0.0192471	0.104578	0.346115	0.039598	0.184809	0.602399	0.000559529	0.00691363	0.830262	0.000960426	0.0129897	0.719594	0.0033786	0.045505	0.590108	0.0014596	0.00716121	0.39081	0.0296955	0.0824243	0.563634	0.157723	0.340134
Zm00001eb005930	10.565	12.415	3.48	2.97	7.935	2.505	17.19	16.345	9.155	15.05	22.075	10.45	-1.83076	1.1545e-05	6.05096e-05	-0.645782	0.137027	0.413674	-0.474277	0.839019	1	-0.191806	0.90913	1	0.433564	0.176165	0.566842	0.190871	0.696758	1	2.34123	3.7393e-07	4.21858e-06	1.47611	8.99458e-08	9.19541e-07	2.06062	0.000700402	0.00439262
Zm00001eb005970	8.075	7.535	9.245	3.955	4.91	7.295	0.001	0.001	0.001	0.001	0.001	0.001	-1.02978	0.0133389	0.032649	-0.617884	0.285653	0.637126	-0.341765	0.819857	0.998922	0	1	1	0	1	1	0	1	1	-11.9495	1.1367e-05	9.69254e-05	-12.2615	2.02962e-07	1.97403e-06	-12.8327	1.8855e-08	3.2317e-07
Zm00001eb005980	0.001	0.9	4.67	18.2	11.725	17.745	2.05	1.815	2.255	9.755	2.615	5.825	14.1517	2.2023e-25	1.38291e-23	3.70352	4.68062e-09	1.70787e-07	1.92592	2.36466e-05	0.000534073	2.25052	1.21904e-05	0.000248446	0.526841	0.632323	0.978516	1.36913	0.026495	0.20615	-0.899725	0.0156976	0.0542993	-2.16471	2.41346e-05	0.000157823	-1.60708	3.38026e-05	0.00031112
Zm00001eb005990	3.89	1.59	6.995	40.395	23.05	33.16	9.57	5.185	8.25	42.08	9.125	20.42	3.37633	3.69545e-23	1.93144e-21	3.85767	7.98385e-15	6.89351e-13	2.24505	3.6902e-08	2.04542e-06	2.13654	1.22683e-10	6.97573e-09	0.815481	0.100272	0.41029	1.30752	0.000107615	0.00281272	0.058958	0.59107	0.79017	-1.33687	0.000113567	0.000639589	-0.699461	0.00475091	0.0220113
Zm00001eb006000	5.745	8.025	14.285	64.95	47.5	44.37	18.935	17.145	19.785	79.815	24.03	29.8	3.49895	7.9103e-34	1.07881e-31	2.56535	5.07692e-12	3.03248e-10	1.63508	1.73095e-06	5.68152e-05	2.0756	1.27979e-14	1.34094e-12	0.487049	0.0957042	0.39963	0.590905	0.0304163	0.226067	0.29733	0.121313	0.272713	-0.983091	0.001511	0.00640179	-0.574272	0.012546	0.0487163
Zm00001eb006010	2.205	2.915	2.945	4.025	2.04	1.655	2	0.245	1.845	1.105	1.14	2.29	0.86821	0.121293	0.208911	-0.514927	0.689098	0.946261	-0.831436	0.481096	0.804281	-0.855954	0.581247	0.899029	2.21818	0.218855	0.634944	0.311727	0.806504	1	-1.86494	0.0136618	0.0484539	-0.839535	0.460891	0.655601	0.468516	0.816647	0.953846
Zm00001eb006040	8.905	11.56	19.78	14.595	17.885	32.28	12.71	13.13	14.545	12.255	12.37	14.83	0.712787	0.0258871	0.057355	0.629609	0.019415	0.105163	0.706598	0.00133109	0.0149133	-0.0525935	0.875463	1	-0.0860214	0.787628	1	0.0279953	1	1	-0.252104	0.669212	0.84741	-0.531905	0.0892684	0.199621	-1.12212	5.15862e-05	0.000451239
Zm00001eb006050	0.325	0.625	0.001	8.18	11.255	1.845	0.445	0.001	0.001	3.16	0.75	0.355	4.65359	4.73643e-09	4.48548e-08	4.17057	8.75372e-09	3.03733e-07	10.8494	0.00805276	0.0583932	2.82805	0.0132134	0.0884015	9.55075	0.250056	0.673115	8.47168	1	1	-1.37218	0.04079	0.117145	-3.90753	5.55464e-09	6.72609e-08	-2.37773	0.0578315	0.162885
Zm00001eb006060	1.785	4.23	6.755	2.59	7.15	1.985	0.001	0.36	0.001	0.001	0.265	0.001	0.537028	0.574249	0.699838	0.757286	0.154841	0.448462	-1.76682	0.00659387	0.0510345	0	1	1	-0.442005	1	1	0	1	1	-11.3387	0.000317261	0.0018926	-4.75388	2.92961e-07	2.75913e-06	-10.9549	0.0163267	0.0603506
Zm00001eb006080	9.94	9.41	7.085	9.6	9.475	11.705	34.99	64.825	40.75	33.34	68.435	40.245	-0.0502114	0.816657	0.899099	0.00993122	0.8524	1	0.724285	0.0213039	0.121159	-0.0696886	0.811121	1	0.0781841	0.862932	1	-0.0179905	0.942258	1	1.79615	1.2255e-11	2.559e-10	2.85254	2.97003e-29	2.01909e-27	1.78168	1.82836e-06	2.21013e-05
Zm00001eb006090	3.59	13.835	14.655	13.76	15.115	17.22	41.485	79.13	57.985	35.225	75.77	46.005	1.93842	1.53476e-07	1.14397e-06	0.127658	0.52909	0.852095	0.232692	0.179926	0.480074	-0.23599	0.716261	0.967858	-0.062598	0.747171	1	-0.333889	0.15928	0.603222	1.35612	9.31763e-08	1.16086e-06	2.32565	7.17482e-22	3.03598e-20	1.41771	7.42637e-05	0.000623384
Zm00001eb006110	5.265	6.8	5.595	4.325	4.265	2.54	68.295	53.53	82.09	44.79	57.88	77.235	-0.283733	0.486288	0.619964	-0.672989	0.276372	0.626391	-1.13931	0.120937	0.380734	-0.608603	0.051818	0.23305	0.112717	0.733248	1	-0.0879517	0.726502	1	3.3724	4.00165e-24	2.38929e-22	3.76245	4.71521e-40	5.76698e-38	4.92635	1.56163e-30	2.75282e-28
Zm00001eb006130	0.165	0.001	0.001	0.001	0.001	0.001	14.07	10.175	18.695	11.01	14.59	22.14	-7.36632	1	1	0	1	1	0	1	1	-0.353808	0.57413	0.89614	0.519951	0.155674	0.527913	0.244003	0.416078	0.89408	13.4265	7.47637e-15	2.17612e-13	13.8327	6.5581e-20	2.34838e-18	14.4344	9.83714e-18	5.59498e-16
Zm00001eb006140	23.615	35.44	35.245	50.095	64.79	67.995	50.06	38.71	53.315	79.49	75.865	90.65	1.08496	2.25435e-06	1.3471e-05	0.870393	7.80113e-05	0.00109905	0.94801	1.8492e-05	0.000432301	0.667115	0.00045123	0.00575663	0.970728	0.00014232	0.00264892	0.765766	0.000476943	0.00970868	0.666107	0.000769701	0.0041451	0.227663	0.162483	0.316539	0.414878	0.336595	0.57282
Zm00001eb006160	9.645	7.315	11.16	12.845	12.11	16.745	5.345	7.085	2.255	9.91	12.19	3.195	0.413354	0.236004	0.355608	0.727269	0.0498605	0.210463	0.585393	0.0265483	0.141714	0.890695	0.0297295	0.159315	0.782858	0.0805223	0.358066	0.502688	0.564775	0.972588	-0.37425	0.47379	0.695984	0.00949926	0.881134	0.971002	-2.38984	1.88425e-07	2.69216e-06
Zm00001eb006180	208.525	251.735	250.045	80.975	102.095	111.77	28.285	35.625	19.35	5.64	16.495	6.685	-1.36467	5.49055e-10	6.03062e-09	-1.30199	9.59036e-08	2.71834e-06	-1.16165	0.000217935	0.00337429	-2.32627	3.15495e-11	1.98502e-09	-1.11086	0.000173874	0.00313984	-1.53333	1.78168e-05	0.00061738	-3.84371	1.19698e-33	1.19026e-31	-2.62981	1.41028e-27	8.52694e-26	-4.06346	6.79943e-32	1.29277e-29
Zm00001eb006200	134.005	51.78	66.21	27.335	31.96	35.865	12.74	17.65	18.495	9.275	9.98	9	-2.29347	4.40424e-20	1.73421e-18	-0.696128	0.0166048	0.0936884	-0.884472	0.00980999	0.0684056	-0.457946	0.371422	0.746318	-0.822556	0.0129873	0.101944	-1.03914	0.00491895	0.0605916	-1.55933	7.24695e-07	7.71383e-06	-1.67916	1.30567e-08	1.50289e-07	-1.99458	6.80907e-09	1.25577e-07
Zm00001eb006220	7.465	0.001	0.001	0.001	0.001	0.001	115.315	133.78	114.435	92.73	45.55	82.18	-12.8659	0.000231001	0.000915094	0	1	1	0	1	1	-0.314472	0.436683	0.802578	-1.55434	0.166666	0.548964	-0.477669	0.0382583	0.262687	16.5007	7.04056e-63	5.08994e-60	15.4752	1.26715e-05	8.77247e-05	16.3265	3.05056e-43	1.84545e-40
Zm00001eb006250	0.001	0.001	0.24	2.655	1.66	0.785	5.31	2.18	2.535	7.335	1.665	3.58	11.3745	8.65185e-05	0.000378274	10.697	0.0100369	0.0628255	1.70966	0.625077	0.898014	0.466085	0.214426	0.562927	-0.388806	0.791459	1	0.497974	0.556591	0.969829	1.46609	0.0037051	0.0160915	0.00433894	1	1	2.1892	0.0194239	0.0693992
Zm00001eb006260	0.42	0.76	1.155	13.015	5.065	4.815	2.17	4.73	2.49	6.625	2.675	2.365	4.95364	3.1171e-18	9.99037e-17	2.73649	0.000685855	0.00702283	2.05964	0.041536	0.191047	1.61023	0.00102661	0.0115233	-0.822301	0.226431	0.648051	-0.0743056	1	1	-0.974183	0.0133084	0.0474334	-0.921023	0.199023	0.368253	-1.0257	0.214925	0.424145
Zm00001eb006270	79.7	123.555	94.75	100.365	125.335	70.23	80.59	45.535	65.62	145.245	115.7	67.6	0.332605	0.181156	0.287785	0.020636	0.638483	0.918094	-0.432039	0.363501	0.700093	0.849816	2.50054e-06	6.01078e-05	1.34534	2.37223e-08	1.24714e-06	0.0428877	0.886711	1	0.533232	0.00450025	0.018972	-0.1154	0.767754	0.900888	-0.0550642	0.434407	0.672426
Zm00001eb006280	2.135	23.205	13.355	18.875	16.59	11.74	0.001	0.001	0.001	0.001	0.365	0.001	3.14417	6.24046e-16	1.52147e-14	-0.484122	0.17418	0.482876	-0.185948	1	1	0	1	1	8.51175	0.500038	0.902459	0	1	1	-14.2042	1.10284e-21	5.3345e-20	-5.50627	4.2242e-17	1.24472e-15	-13.5191	2.40473e-12	7.34892e-11
Zm00001eb006310	70.49	1.815	6.17	57.985	1.845	13.04	34.175	2.685	2.235	36.715	1.18	2.84	-0.281739	0.150416	0.248228	0.0236513	1	1	1.0796	0.0163699	0.0992195	0.103428	0.456769	0.815973	-1.18614	0.179795	0.570484	0.345616	0.834892	1	-0.65931	0.0388892	0.112906	-0.644834	0.610411	0.784989	-2.19898	0.000356606	0.00244705
Zm00001eb006350	15.31	14.515	10.845	13.655	14.065	21.79	61.78	48.24	28.645	57.375	34.715	51.445	-0.165045	0.600728	0.722557	-0.045435	0.944087	1	1.00664	0.000430613	0.00597662	-0.106718	0.9121	1	-0.474671	0.0542957	0.279805	0.844748	0.00129349	0.0217522	2.07099	9.43381e-14	2.45711e-12	1.30345	1.33703e-07	1.33528e-06	1.23936	0.000412697	0.00278953
Zm00001eb006360	4.365	2.84	2.475	2.945	2.44	0.29	1.635	1.205	1.19	0.255	1.655	1.285	-0.567714	0.26466	0.387873	-0.21901	1	1	-3.0933	0.021548	0.121748	-2.68072	0.0713859	0.28907	0.457798	1	1	0.110807	1	1	-3.5297	0.00135611	0.00673621	-0.56005	0.668963	0.829469	2.14764	0.307019	0.538214
Zm00001eb006380	37.135	16.38	13.975	14.685	12.59	7.075	13.3	13.605	16.58	11.805	13.005	13.65	-1.33844	2.57572e-08	2.18694e-07	-0.379657	0.356549	0.713492	-0.982046	0.0372981	0.178236	-0.172028	0.934943	1	-0.0650706	0.792508	1	-0.280543	0.381177	0.866703	-0.314945	0.509105	0.725418	0.0467881	0.763613	0.898339	0.948099	0.0669592	0.182746
Zm00001eb006410	0.735	5.47	6.005	52.23	62.025	24.475	11.925	18.955	21.78	77.51	57.26	73.11	6.15099	4.9952e-45	1.69869e-42	3.50324	3.94531e-21	8.25737e-19	2.02707	2.15678e-07	9.29811e-06	2.70039	2.43434e-23	6.87568e-21	1.59495	3.83838e-09	2.27994e-07	1.74706	9.62719e-13	1.78474e-10	0.569504	0.00713965	0.0279945	-0.115322	0.836532	0.945462	1.57876	5.34707e-06	5.83074e-05
Zm00001eb006420	4.43	3.42	11.04	170.43	112.995	113.455	16.765	2.765	4.335	110.375	14.685	11.225	5.26573	1.06166e-41	2.83668e-39	5.04612	2.8389e-16	3.10758e-14	3.36131	2.24222e-13	4.38261e-11	2.71889	5.04288e-16	6.3304e-14	2.40899	3.18024e-07	1.26415e-05	1.37261	0.000918092	0.016605	-0.626766	0.0830024	0.204535	-2.94384	3.36271e-09	4.20692e-08	-3.33733	6.77947e-17	3.49044e-15
Zm00001eb006430	7.735	1.97	21.47	101.4	84.42	178.245	36.06	6.165	17.6	55.155	13.4	21.92	3.71251	2.93947e-17	8.41838e-16	5.42132	1.06471e-15	1.04326e-13	3.05347	2.56817e-07	1.07335e-05	0.613092	0.0345217	0.176029	1.12006	0.0153221	0.114876	0.316672	0.289937	0.783587	-0.878494	0.032915	0.0993168	-2.65535	6.50053e-07	5.75973e-06	-3.02354	4.36901e-25	4.65177e-23
Zm00001eb006440	2.15	0.875	3.85	76.895	50.25	36.36	10.725	1.46	3.065	63.4	7.625	6.875	5.16048	3.01038e-44	9.73172e-42	5.8437	5.89088e-16	6.11576e-14	3.23942	5.52454e-11	6.35469e-09	2.56351	1.02266e-13	9.4569e-12	2.38477	0.000156277	0.00286573	1.16547	0.0231329	0.187393	-0.278407	0.52472	0.738102	-2.72031	1.97436e-07	1.92583e-06	-2.40292	7.58236e-09	1.38999e-07
Zm00001eb006480	28.545	28.65	65.36	29.86	29.255	46.615	56.76	18.29	50.61	39.265	38.36	52.435	0.0649761	0.942557	0.995035	0.0301481	0.661787	0.93076	-0.487614	0.405638	0.739632	-0.531631	0.136345	0.429867	1.06855	0.00211585	0.0246748	0.0511076	0.821131	1	0.39503	0.0407169	0.116986	0.39092	0.0444551	0.114648	0.169736	1	1
Zm00001eb006520	2.325	7.335	6.2	6.76	6.315	5.97	7.215	5.475	5.59	5.05	6.28	6.41	1.53979	0.00251617	0.00765047	-0.216014	0.909588	1	-0.0545373	0.889414	1	-0.514716	0.448666	0.812275	0.197906	0.780064	1	0.197476	0.679163	1	-0.42074	0.494534	0.714541	-0.00801817	1	1	0.102593	1	1
Zm00001eb006530	6.875	24.58	7.645	8.515	10.82	2.005	10.995	12.475	12.07	7.46	10.7	8.58	0.308647	0.518386	0.648912	-1.18378	0.00576285	0.0407966	-1.93091	0.00418075	0.0360068	-0.5596	0.423149	0.792091	-0.221429	0.596386	0.962763	-0.492376	0.41029	0.888195	-0.190831	0.941077	1	-0.0160897	1	1	2.09738	0.0262096	0.0879978
Zm00001eb006540	120.985	103.84	115.295	109.685	94.4	84.02	171.415	141.475	162.595	133.765	138.095	171.24	-0.141462	0.39262	0.527354	-0.137504	0.829724	1	-0.456525	0.321005	0.657904	-0.357793	0.304617	0.672341	-0.0348861	0.788364	1	0.0747368	0.72292	1	0.286334	0.0810699	0.200679	0.548802	0.0011531	0.00505462	1.02722	0.00129682	0.00746833
Zm00001eb006560	38.24	16.955	21.09	16.81	13.9	18.14	18.16	18.31	18.76	18.01	15.595	21.63	-1.18576	2.12573e-07	1.54575e-06	-0.286626	0.535169	0.856809	-0.217385	1	1	-0.011966	0.697803	0.958171	-0.231548	0.41033	0.842368	0.205374	0.488368	0.942176	0.0994785	0.499818	0.718596	0.165999	0.493019	0.685966	0.253859	0.828144	0.960545
Zm00001eb006600	0.001	0.001	0.001	0.225	0.001	0.001	31.865	26.755	31.495	24.115	26.135	41.165	7.81378	1	1	0	1	1	0	1	1	-0.402042	0.31504	0.685162	-0.0338254	0.870749	1	0.386295	0.117828	0.516273	6.74386	4.2718e-29	3.40078e-27	14.6737	6.26187e-33	5.29099e-31	15.3291	1.53123e-29	2.45532e-27
Zm00001eb006610	4.5	16.625	9.005	4.825	6.72	2.335	11.055	8.94	12.295	5.06	7	7.515	0.100604	1	1	-1.30682	0.000570613	0.00604565	-1.9473	0.000713306	0.00904983	-1.12749	0.0479072	0.220839	-0.35292	0.395753	0.829232	-0.710227	0.14152	0.566299	0.0686084	0.823872	0.946965	0.0588937	0.833178	0.943503	1.68635	0.0349769	0.110467
Zm00001eb006620	38.9	26.835	22.895	29.115	40.4	41.145	18.5	29.915	24.635	38.97	46.79	38.34	-0.418008	0.0400213	0.0829672	0.590239	0.00805564	0.05282	0.845685	0.000108263	0.00188255	1.07484	4.21877e-06	9.66709e-05	0.645331	0.0101478	0.0848667	0.638141	0.0120519	0.118348	0.420601	0.033688	0.101215	0.211845	0.198027	0.366735	-0.101867	0.360426	0.599175
Zm00001eb006630	1.885	3.965	3.58	8.05	4.34	3.905	16.325	7.48	20.25	56.54	21.51	38.49	2.09442	3.03901e-05	0.000146388	0.130374	0.661926	0.930777	0.125363	0.741144	0.964496	1.79219	8.77247e-09	3.65895e-07	1.5239	1.62281e-05	0.000405314	0.926562	0.00061221	0.0119021	2.81221	1.70627e-24	1.05406e-22	2.30924	6.99635e-13	1.37187e-11	3.30109	4.87995e-13	1.62571e-11
Zm00001eb006640	1.175	1.04	1.385	1.455	2.195	1.63	7.55	2.64	9.49	31.82	8.58	18.15	0.308358	0.810415	0.894257	1.07764	0.307574	0.662552	0.234986	0.774554	0.978364	2.07539	9.62586e-11	5.67184e-09	1.70044	0.00218721	0.0254048	0.93549	0.00413015	0.0530663	4.45084	5.80673e-29	4.59539e-27	1.96676	5.45382e-05	0.000330275	3.47703	3.25559e-10	7.43839e-09
Zm00001eb006670	0.69	2.295	1.455	5.085	3.865	2.715	5.855	6.79	10.485	4.81	4.12	4.41	2.88158	1.7749e-05	8.95488e-05	0.751974	0.222034	0.556709	0.899933	0.221858	0.540504	-0.283632	0.89451	1	-0.720767	0.121911	0.465188	-1.24948	0.00892039	0.0952756	-0.0802109	1	1	0.0921759	0.88344	0.972263	0.699826	0.515952	0.742646
Zm00001eb006680	7.465	13.12	3.525	9.36	10.305	1.645	6.33	8.485	2.805	3.42	12.13	3.515	0.326366	0.479473	0.613456	-0.348423	0.485756	0.824307	-1.09954	0.313221	0.64803	-0.888209	0.146702	0.448107	0.515593	0.232374	0.654362	0.325524	0.713887	1	-1.45251	0.00285931	0.0128414	0.235235	0.426562	0.624409	1.09544	0.352096	0.590107
Zm00001eb006690	14.65	17.305	5.775	35.26	28.84	14.845	17.875	10.26	14.5	117.335	28.845	42.57	1.26713	1.25948e-05	6.54483e-05	0.736882	0.0749583	0.278432	1.36208	6.5808e-05	0.00124599	2.71462	2.95083e-12	2.26187e-10	1.49129	0.000808172	0.0112755	1.55378	3.20334e-06	0.000143591	1.73453	1.41024e-06	1.42242e-05	0.000250099	0.902942	0.984143	1.51986	0.000163996	0.00124935
Zm00001eb006700	9.785	12.22	9.215	29.28	17.935	13.925	28.585	13.24	26.92	60.775	18	38.855	1.58127	3.64148e-09	3.51335e-08	0.553533	0.0443422	0.192768	0.595621	0.030933	0.158263	1.08822	4.97778e-06	0.000111123	0.443094	0.218552	0.634944	0.529422	0.0592946	0.346061	1.05356	1.85565e-05	0.000150552	0.00521916	0.850644	0.952748	1.48042	5.17264e-05	0.000452317
Zm00001eb006710	2.44	3.035	3.85	10.73	4.68	4.245	13.22	0.99	7.74	16.265	4.73	10.53	2.1367	3.95809e-07	2.73247e-06	0.624812	0.323049	0.679064	0.140906	0.669301	0.925487	0.299049	0.235773	0.592657	2.25634	0.00960105	0.081362	0.4441	0.271545	0.765492	0.600121	0.0317452	0.0963966	0.0153317	1	1	1.31067	0.031259	0.101193
Zm00001eb006720	14.96	29.495	43.13	76.89	62.37	89.69	40.88	29.815	36.06	82.93	46.05	52.875	2.36169	2.04143e-25	1.29118e-23	1.08038	2.39139e-06	4.91852e-05	1.05626	1.46232e-05	0.000355276	1.0205	1.72995e-06	4.34745e-05	0.627163	0.0130332	0.102179	0.552186	0.0429353	0.280762	0.109098	0.344724	0.570296	-0.437651	0.0617234	0.149238	-0.762361	0.00291927	0.0147616
Zm00001eb006760	6.765	2.915	4.335	2.455	4.05	5.195	27.425	26.61	32.405	20.225	19.48	22.145	-1.46237	0.00164615	0.00527401	0.474426	0.451831	0.799892	0.261092	0.422511	0.757156	-0.439352	0.297517	0.666144	-0.449975	0.0912549	0.388437	-0.549235	0.0354888	0.249614	3.04234	5.60032e-15	1.64981e-13	2.266	6.34357e-11	9.70375e-10	2.09179	2.05127e-06	2.44408e-05
Zm00001eb006770	40.45	167.185	63.165	52.795	99.87	44.07	5.275	3.285	3.01	5.745	11.22	11.185	0.384262	0.218642	0.334608	-0.743322	0.0253586	0.128224	-0.519328	0.237183	0.561651	0.123136	0.772653	0.993672	1.77211	0.000537445	0.00815009	1.89373	3.02117e-05	0.000970438	-3.20002	4.1728e-13	1.02121e-11	-3.15398	3.86507e-35	3.79216e-33	-1.97823	2.53255e-11	6.71428e-10
Zm00001eb006820	0.001	7.11	4.01	4.165	4.82	6.045	9.145	9.92	7.975	8.675	8.57	9.56	12.0241	1.27552e-05	6.62162e-05	-0.560816	0.381688	0.737029	0.59214	0.187364	0.492637	-0.0761194	0.91925	1	-0.211045	0.583307	0.954022	0.261526	0.582782	0.982666	1.05855	0.0252906	0.0800802	0.830262	0.0335928	0.091293	0.661268	0.316846	0.54968
Zm00001eb006850	23.945	24.165	18.435	30.625	27.185	17.42	30.21	19.035	24.665	33.31	30.92	37.39	0.354985	0.175201	0.280025	0.169892	0.400103	0.754359	-0.0817028	0.806085	0.991967	0.140929	0.268766	0.629917	0.699886	0.018015	0.129732	0.600187	0.017349	0.152167	0.121246	0.37864	0.604598	0.185729	0.34989	0.545602	1.10191	0.0040463	0.0192433
Zm00001eb006860	0.605	1.01	2.905	4.885	8.005	14.91	0.34	0.001	0.001	0.001	0.001	1.395	3.01335	0.000193307	0.000780894	2.98655	0.000608523	0.00635283	2.35967	2.11036e-08	1.26117e-06	-8.40939	1	1	0	1	1	10.446	0.0327773	0.236898	-12.2541	1.40401e-05	0.000117325	-12.9667	4.22619e-07	3.86607e-06	-3.41794	1.00396e-09	2.12259e-08
Zm00001eb006890	40.61	43.48	90.905	91.825	70.605	106.82	20.285	14.51	23.565	27.76	27.87	33.56	1.17705	1.00812e-07	7.76854e-07	0.699418	0.00207786	0.0178116	0.23275	0.117845	0.375521	0.452594	0.0389988	0.191073	0.941665	0.00142288	0.0179675	0.510097	0.0904064	0.445746	-1.72588	7.75578e-11	1.49359e-09	-1.34106	7.20948e-09	8.58249e-08	-1.67037	5.57402e-09	1.04929e-07
Zm00001eb006900	36.04	52.455	63.22	47.195	50.96	58.44	14.52	15.485	23.39	11.545	10.21	10.51	0.389035	0.089736	0.163278	-0.041715	0.875457	1	-0.113425	0.790385	0.985734	-0.330773	0.599715	0.91067	-0.600889	0.0674593	0.318211	-1.15413	0.000423445	0.00879207	-2.03137	9.50764e-13	2.24863e-11	-2.31938	3.08919e-19	1.05676e-17	-2.47519	3.00765e-14	1.1569e-12
Zm00001eb006940	27.795	16.02	23.3	38.035	34.875	47.455	24.945	18.11	28.655	37.025	16.83	33.815	0.452502	0.0646397	0.124272	1.12232	9.75759e-06	0.000174728	1.02623	1.00097e-05	0.00025511	0.569749	0.00376237	0.0334468	-0.105751	0.673452	1	0.238876	0.34006	0.833184	-0.0388279	0.816642	0.944659	-1.05116	7.18732e-05	0.000421899	-0.488897	0.0205087	0.0722518
Zm00001eb007000	6.585	12.56	10.145	8.695	8.625	3.985	3.58	14.365	11.57	7.895	10.495	14.715	0.401003	0.410799	0.545586	-0.54224	0.186566	0.502427	-1.34812	0.0116995	0.0781798	1.14098	0.0125791	0.0851101	-0.452856	0.195613	0.598264	0.346899	0.533871	0.957102	-0.139247	1	1	0.283106	0.356459	0.552276	1.88464	0.00459135	0.0214027
Zm00001eb007060	1.145	12.815	11.505	30.935	24.045	19.425	9.39	9.88	9.635	14.2	13.49	10.095	4.75582	6.19872e-32	7.24613e-30	0.907903	0.000667441	0.00686006	0.755654	0.00326002	0.0297047	0.596694	0.0282876	0.153906	0.449307	0.255551	0.677829	0.0672843	1	1	-1.12335	8.61283e-05	0.000598091	-0.833847	0.00387228	0.0145837	-0.944274	0.00320264	0.0158483
Zm00001eb007130	23.55	12.28	15.18	10.135	8.595	10.95	12.1	9.615	11.52	8.04	9.75	11.835	-1.21638	5.38189e-06	3.008e-05	-0.514741	0.241599	0.584062	-0.471241	0.440378	0.771329	-0.58974	0.2521	0.611026	0.0201154	1	1	0.038919	1	1	-0.334079	0.580536	0.781833	0.181905	0.571356	0.753963	0.112129	1	1
Zm00001eb007230	6.1	4.71	7.73	26.775	17.365	15.07	10.715	13.38	9.88	19.98	10.575	15.14	2.13401	7.60689e-13	1.26628e-11	1.88238	1.89268e-07	4.9715e-06	0.963139	0.00175394	0.0184672	0.898925	0.0104154	0.073705	-0.33942	0.397302	0.830483	0.615782	0.139485	0.563105	-0.42233	0.315645	0.537544	-0.715525	0.0263707	0.0745305	0.00668579	0.71769	0.892019
Zm00001eb007270	42.565	29.785	36.445	41.44	47.87	37.8	16.61	17.14	17.585	15.3	19.64	22.965	-0.0386436	0.742703	0.841817	0.684536	0.00304745	0.0245013	0.0526653	0.375798	0.711266	-0.11852	1	1	0.196428	0.583662	0.954085	0.385091	0.306202	0.798013	-1.43749	4.00696e-07	4.48648e-06	-1.28533	2.89196e-07	2.72654e-06	-0.718949	0.00969377	0.0396175
Zm00001eb007280	23.28	42.4	40.06	51.37	55.71	91.45	33.585	47.945	37.54	35.03	33.51	46.66	1.14184	4.09547e-06	2.33384e-05	0.393872	0.0529774	0.219303	1.19082	2.60773e-05	0.000578418	0.060774	0.599777	0.91067	-0.516789	0.0212658	0.146352	0.313758	0.193711	0.659453	-0.552335	0.126831	0.281755	-0.733345	0.00131678	0.00567863	-0.970797	0.000283614	0.00200564
Zm00001eb007320	31.085	73.08	40.23	54.215	53.935	36.035	55.68	153.845	77.73	85.285	145.08	80.615	0.802473	0.000280253	0.00108653	-0.438255	0.140041	0.419855	-0.158873	0.947718	1	0.615133	0.000568927	0.0070164	-0.0846289	0.648769	0.98741	0.0525768	0.817504	1	0.6536	0.000634941	0.0035091	1.42755	1.53295e-12	2.86732e-11	1.16165	0.000880388	0.00536006
Zm00001eb007470	9.9	17.58	14.125	26.485	23.34	10.735	14.205	6.965	11.35	19.39	14.52	11.135	1.41968	2.13058e-07	1.54808e-06	0.408869	0.096294	0.331044	-0.395929	0.603593	0.886597	0.448914	0.101144	0.358704	1.05985	0.00830062	0.0723661	-0.0275907	1	1	-0.449863	0.241822	0.449697	-0.684763	0.0137447	0.0432003	0.0527794	0.87402	0.987045
Zm00001eb007490	2.425	3.205	3.21	4.69	2.495	2	3.455	2.475	5.33	5.34	7.07	5.06	0.951603	0.0973127	0.174617	-0.361285	0.867833	1	-0.682573	0.509658	0.818664	0.628154	0.197325	0.53716	1.51428	0.0110799	0.0906844	-0.0749981	1	1	0.187252	0.70822	0.874778	1.50267	0.00196484	0.00809915	1.33914	0.0919902	0.229721
Zm00001eb007510	21.03	16.43	11.735	11.61	11.755	5.935	6.45	5.7	7.605	4.605	6.03	6.035	-0.857081	0.0012008	0.00398921	-0.483058	0.240206	0.582429	-0.983498	0.0451001	0.202037	-0.486098	0.613421	0.917026	0.0811961	1	1	-0.333594	0.459681	0.926196	-1.33409	0.00215423	0.0101041	-0.963045	0.0145563	0.0453468	0.0241057	0.903613	1
Zm00001eb007560	4.585	2.21	4.28	3.03	4.155	4.75	0.001	0.001	0.001	0.001	0.001	0.001	-0.597604	0.230297	0.348674	0.910802	0.127438	0.397192	0.150317	0.632536	0.900339	0	1	1	0	1	1	0	1	1	-11.5651	9.4705e-05	0.000651392	-12.0206	5.37071e-06	4.04316e-05	-12.2137	1.88359e-05	0.000184261
Zm00001eb007570	25.995	14.03	16.035	12.035	10.695	10.59	11.35	13.2	10.96	11.47	10.68	9.015	-1.111	1.94511e-05	9.74041e-05	-0.391579	0.370873	0.727394	-0.598522	0.274599	0.605264	0.0151731	0.66566	0.942882	-0.305626	0.337486	0.774877	-0.281848	0.47274	0.932909	-0.0693708	1	1	-0.00202484	0.930849	1	-0.232303	0.419384	0.65747
Zm00001eb007650	34.77	21.88	37.695	98.53	65.64	61.695	46.33	15.485	40.815	87.705	23.89	64.565	1.50272	9.41324e-11	1.15288e-09	1.58496	1.05926e-10	5.22873e-09	0.71078	0.0010934	0.0126836	0.920712	8.73642e-05	0.00142241	0.625535	0.065866	0.313549	0.661653	0.00229426	0.0337367	-0.167904	0.790466	0.92921	-1.45817	7.95289e-10	1.0726e-08	0.0655987	0.777593	0.932445
Zm00001eb007670	107.625	231.25	236.185	224.265	231.125	274.83	261.515	394.93	278.21	552.45	452.105	435.865	1.05919	4.27582e-05	0.000199221	-0.000780046	0.70358	0.953668	0.218622	0.121182	0.381015	1.07895	2.70157e-08	1.00143e-06	0.195061	0.47797	0.894287	0.647707	0.000993756	0.0177386	1.30064	1.33457e-10	2.4846e-09	0.967985	9.22324e-08	9.4148e-07	0.665342	0.0605782	0.16888
Zm00001eb007690	28.795	5.755	6.115	5.5	5.9	5.835	4.655	4.435	5.625	5.69	5.035	6.32	-2.38831	1.37126e-14	2.83622e-13	0.035899	0.90305	1	-0.0676198	0.780762	0.98137	0.289647	0.414017	0.783786	0.183058	0.872619	1	0.168071	0.893386	1	0.048997	0.905443	0.991731	-0.228723	0.803108	0.92429	0.115192	1	1
Zm00001eb007740	9.49	5.955	10.49	22.045	21.045	13.75	3.415	4.39	7.97	12.025	6.76	11.26	1.21597	0.000225774	0.000896693	1.8213	4.67418e-08	1.42625e-06	0.390417	0.22129	0.539699	1.81608	7.8883e-06	0.000168567	0.622802	0.266923	0.691669	0.498555	0.249025	0.73882	-0.874415	0.0106456	0.0392501	-1.63838	3.64068e-07	3.36958e-06	-0.288225	0.315289	0.547875
Zm00001eb007860	500.125	250.19	201.125	190.775	191.86	120.575	144.355	116.89	171.53	99.44	150.88	180.32	-1.39042	1.74737e-13	3.12107e-12	-0.38297	0.1771	0.487765	-0.738162	0.0388164	0.18277	-0.537723	0.0925945	0.339792	0.36825	0.184114	0.579101	0.0720985	0.729358	1	-0.939974	0.000384324	0.00223923	-0.346652	0.122163	0.255078	0.580629	0.116347	0.27317
Zm00001eb007880	1.33	1.51	1.53	3.11	4.575	6.68	0.36	0.765	0.39	1.485	1.675	3.335	1.22549	0.206167	0.319512	1.59922	0.0109836	0.067565	2.12632	0.00117053	0.0134322	2.04439	0.179838	0.509606	1.13063	0.35052	0.787456	3.09614	0.00939878	0.0990402	-1.06645	0.352501	0.578434	-1.44961	0.0256344	0.0727966	-1.00216	0.0706538	0.190258
Zm00001eb007950	27.13	17.825	31.175	48.905	25.695	44.875	15.905	11.555	12.82	29.905	10.455	17.83	0.850093	0.00568212	0.0155879	0.527586	0.0246592	0.125561	0.525522	0.0101568	0.0702784	0.910906	0.000223222	0.00318705	-0.144324	0.687538	1	0.47591	0.127298	0.53833	-0.709595	0.0136711	0.0484663	-1.29729	2.16012e-06	1.74675e-05	-1.33161	2.95083e-06	3.40612e-05
Zm00001eb008070	17.795	21.63	16.52	14.715	35.39	15.39	8.315	14.88	14.565	16.11	46.42	34.585	-0.274184	0.268291	0.392206	0.710308	0.00468409	0.0346271	-0.10222	0.851828	1	0.954168	0.00823401	0.0613547	1.64137	1.87742e-08	1.00525e-06	1.24764	7.62063e-06	0.000303352	0.130669	0.509887	0.726028	0.391405	0.0695006	0.163612	1.16815	0.00411647	0.0195316
Zm00001eb008080	0.175	0.48	0.001	1.875	2.3	0.405	1.66	9.22	2.495	4.235	56.88	25.135	3.42146	0.010445	0.0264563	2.26053	0.0562277	0.228492	8.66178	0.500758	0.815753	1.35118	0.0192787	0.116279	2.62508	5.41954e-11	4.67946e-09	3.33259	1.85471e-12	3.18789e-10	1.17547	0.0468244	0.13059	4.62822	3.10742e-29	2.10714e-27	5.95563	7.00434e-15	2.88163e-13
Zm00001eb008110	1.225	0.665	2.13	0.84	2.615	4.145	2.995	0.405	2.14	2.7	2.795	8.12	-0.544321	0.592935	0.71585	1.97538	0.0263214	0.13192	0.960519	0.108205	0.357057	-0.149597	1	1	2.78685	0.0348133	0.207448	1.92387	0.000481838	0.00978531	1.6845	0.0673821	0.174711	0.0960373	1	1	0.970108	0.136911	0.308812
Zm00001eb008130	1.855	0.96	3.09	0.345	1.515	0.25	1.285	0.755	0.745	0.76	0.685	1.73	-2.42675	0.016233	0.0385683	0.658211	0.5624	0.874641	-3.62761	0.00343767	0.0310729	-0.757697	1	1	-0.140373	1	1	1.21546	0.366893	0.855227	1.1394	0.70942	0.875488	-1.14514	0.403345	0.600333	2.79077	0.0914896	0.228901
Zm00001eb008150	5.005	7.92	4.83	3.9	4.61	1.035	7.115	16.585	23.04	4.685	44.495	35.455	-0.359896	0.461287	0.595807	-0.780734	0.150602	0.441016	-2.22239	0.00438578	0.037174	-0.602815	0.378038	0.751876	1.42376	1.06756e-07	4.8079e-06	0.621848	0.0176755	0.154149	0.264575	0.576629	0.778821	3.2708	1.10866e-29	7.7332e-28	5.09829	2.5338e-21	2.00728e-19
Zm00001eb008160	48.21	55.045	85.14	3.675	4.65	10.71	43.35	42.355	62.92	7.8	12.09	20.965	-3.71352	1.53472e-26	1.08612e-24	-3.56531	1.89949e-26	6.90199e-24	-2.99088	9.41053e-20	8.43573e-17	-2.47449	1.69081e-11	1.13236e-09	-1.80872	2.36202e-12	2.65483e-10	-1.58554	3.8072e-06	0.000166912	1.08573	0.00766532	0.029781	1.37851	0.000157985	0.000863951	0.969024	0.0235452	0.080639
Zm00001eb008170	14.845	29.385	24.76	7.145	7.37	3.305	29.415	56.165	39.55	17.145	34.53	21.625	-1.05497	0.000936477	0.00319917	-1.99534	1.26804e-09	5.15931e-08	-2.90529	2.28791e-08	1.35482e-06	-0.778764	0.0574527	0.249985	-0.701821	0.00394124	0.0406479	-0.870978	0.0167262	0.148618	1.26278	0.000983694	0.00513321	2.22811	3.71669e-16	1.00349e-14	2.70998	4.42574e-08	7.09238e-07
Zm00001eb008180	1.385	1.84	1.495	8.58	30.07	5.8	0.335	0.42	0.001	6.48	5.19	2.59	2.63109	1.06971e-05	5.64556e-05	4.03055	3.91114e-23	1.03357e-20	1.95591	0.000556045	0.00733065	4.27376	0.000343561	0.00457114	3.62727	0.000177145	0.0031821	11.3387	0.00216443	0.0323151	-0.404984	0.706716	0.873462	-2.53452	8.47492e-16	2.19324e-14	-1.1631	0.0418212	0.126615
Zm00001eb008200	102.94	47.705	62.08	108.26	88.08	66.38	133.025	76.435	171.28	235.845	142.395	187.8	0.0726966	0.877323	0.943592	0.884674	2.9013e-05	0.000461141	0.0966201	0.286743	0.620283	0.826142	3.85716e-05	0.000696029	0.897593	0.000134982	0.00253769	0.13284	0.550735	0.967051	1.12334	1.50503e-07	1.81573e-06	0.693012	6.46524e-05	0.000385168	1.50038	1.1638e-06	1.46191e-05
Zm00001eb008250	11.32	22.175	13.77	20.035	17.26	4.615	35.615	23.21	31.56	24.715	36.87	34.99	0.823649	0.00435288	0.012404	-0.361502	0.357955	0.714763	-1.57713	0.00255182	0.0246148	-0.527098	0.16994	0.491911	0.667701	0.0205018	0.142637	0.148845	0.58412	0.982666	0.302864	0.157477	0.329554	1.09501	1.41668e-06	1.18321e-05	2.92254	1.11941e-11	3.13317e-10
Zm00001eb008270	35.34	27.63	28.2	77.72	52.235	38.055	43.405	39.105	43.96	43.08	43.95	55.93	1.13698	8.26236e-08	6.4582e-07	0.918781	4.35795e-05	0.000662094	0.432391	0.17215	0.469263	-0.010843	0.572483	0.895015	0.16851	0.560834	0.939237	0.347431	0.140037	0.564156	-0.851268	0.000804949	0.00430545	-0.249154	0.361078	0.556952	0.555536	0.342228	0.579812
Zm00001eb008290	6.575	4.955	4.55	15.425	8.795	6.985	26.17	19.72	26.19	21.28	25.33	32.205	1.23021	0.000121808	0.000516274	0.827799	0.0306646	0.148071	0.618394	0.177791	0.478599	-0.298416	0.590972	0.904755	0.361188	0.206718	0.617736	0.298269	0.239773	0.725301	0.464228	0.042263	0.120593	1.52609	6.3188e-09	7.59305e-08	2.20495	1.58005e-07	2.29072e-06
Zm00001eb008350	1.86	4.3	3.17	6.08	4.255	4.39	5.455	2.985	4.935	4.715	4.37	4.53	1.70877	0.00158986	0.00511306	-0.0151775	1	1	0.469738	0.362342	0.698799	-0.210321	1	1	0.549902	0.462318	0.881076	-0.123539	0.876159	1	-0.366814	0.675004	0.851597	0.0384741	1	1	0.0452901	0.881721	0.991076
Zm00001eb008360	6.675	15.61	6.525	7.68	59.19	4.09	1.435	5.975	1.8	2.3	87.7	11.22	0.202338	0.715475	0.81929	1.92288	2.12455e-13	1.56571e-11	-0.673877	0.363466	0.700093	0.680583	0.346976	0.719395	3.87557	1.48053e-31	1.54425e-28	2.64	2.37679e-07	1.44129e-05	-1.73947	0.0014911	0.007297	0.567223	0.00209517	0.00854173	1.4559	0.00893039	0.0369688
Zm00001eb008400	81.445	45.745	42.905	33.365	31.535	31.105	46.745	34.255	52.925	33.35	44.185	56.035	-1.28749	8.98623e-09	8.17881e-08	-0.53666	0.0643424	0.251844	-0.463999	0.349451	0.687113	-0.487125	0.14569	0.446432	0.367242	0.154942	0.526145	0.0823789	0.713536	1	-0.000648742	0.708712	0.875031	0.486603	0.00961875	0.0318386	0.849182	0.0169757	0.0622824
Zm00001eb008430	1.935	2.115	2.44	1.715	1.52	1.66	4.44	3.64	3.83	4.665	3.645	3.035	-0.174125	0.840205	0.916584	-0.476586	0.806344	0.99834	-0.555698	0.803781	0.990947	0.0713174	0.767414	0.991895	0.00198036	1	1	-0.335648	0.707086	1	1.44367	0.0103003	0.0381031	1.26185	0.056963	0.140132	0.870513	0.398557	0.637126
Zm00001eb008440	22.895	17.03	13.86	39.205	30.305	22.21	47.48	40.255	43.95	66.815	65.055	48.615	0.776005	0.00195075	0.00613361	0.831477	0.000560704	0.00595822	0.680282	0.00495541	0.0408695	0.492852	0.00500419	0.0419464	0.692492	0.00522427	0.0508314	0.145538	0.560963	0.971329	0.769134	0.000303559	0.00182183	1.1021	2.12406e-08	2.38146e-07	1.13019	0.000605346	0.00387269
Zm00001eb008460	55.22	45.96	53.5	68.995	42.865	29.87	39.555	32.6	40.605	29.555	28.075	34.36	0.321301	0.170881	0.274664	-0.100579	0.97593	1	-0.840842	0.0203475	0.117077	-0.420458	0.318303	0.689451	-0.215586	0.38959	0.821922	-0.240927	0.334316	0.82655	-1.22309	1.44986e-05	0.000120742	-0.610514	0.0129215	0.0409686	0.202033	0.916567	1
Zm00001eb008470	26.39	17.54	19.865	16.25	15.61	15.88	40.335	41.77	42.38	45.35	38.585	43.3	-0.699552	0.003735	0.0108583	-0.168178	0.791828	0.994088	-0.323018	0.738834	0.962923	0.16907	0.179711	0.509606	-0.114427	0.580678	0.952373	0.0309834	0.910283	1	1.48066	2.59187e-10	4.60971e-09	1.30557	2.14605e-08	2.40209e-07	1.44716	3.99054e-05	0.000360679
Zm00001eb008500	6.41	8.06	4.165	4.445	5.32	0.8	3.495	1.73	3.415	0.415	2.16	2.07	-0.528141	0.187176	0.295752	-0.599354	0.257414	0.603122	-2.38024	0.00446179	0.0375611	-3.07411	0.00236415	0.0229054	0.320259	1	1	-0.722255	0.363555	0.852829	-3.421	8.63982e-05	0.000599653	-1.30039	0.0253699	0.0721959	1.37156	0.32235	0.556441
Zm00001eb008520	9.91	8.035	3.38	3.875	5.53	1.595	2.435	2.235	1.825	0.78	1.645	1.315	-1.35469	0.000364011	0.00137146	-0.539019	0.312888	0.668282	-1.08347	0.263672	0.591723	-1.64238	0.179799	0.509606	-0.442187	0.607445	0.966486	-0.472834	0.797784	1	-2.31265	0.00372948	0.0161843	-1.74919	0.00260583	0.0103235	-0.278494	0.811145	0.951148
Zm00001eb008530	66.56	36.835	46.635	69.87	77.305	84.665	19.625	34.98	41.69	79.92	38.92	24.575	0.0700177	0.90161	0.962166	1.06948	1.31662e-05	0.000227362	0.860353	0.00664426	0.0513144	2.02586	1.2701e-17	1.94139e-15	0.153981	0.738295	1	-0.76251	0.00859854	0.0926771	0.193883	0.235407	0.44099	-0.99005	4.14144e-05	0.000258273	-1.78457	3.0734e-08	5.04986e-07
Zm00001eb008590	14.87	7.745	10.17	6.375	5.665	6.135	12.805	12.285	14.965	6.195	9.43	12.34	-1.22191	0.000177735	0.000723905	-0.451189	0.486544	0.824976	-0.729184	0.238131	0.562353	-1.04753	0.0264381	0.146705	-0.381568	0.272757	0.698735	-0.27825	0.422986	0.901112	-0.0413211	1	1	0.735182	0.0372078	0.0993136	1.00821	0.0785925	0.204295
Zm00001eb008630	11.64	15.64	8.1	11.06	6.82	2.725	10.465	6.475	9.86	4.51	5.08	6.17	-0.0737397	0.77771	0.869156	-1.1974	0.00240762	0.020124	-1.57167	0.0115086	0.0773271	-1.21437	0.0251356	0.141038	-0.350052	0.474582	0.891619	-0.676317	0.244622	0.731689	-1.29415	0.00904182	0.0343795	-0.424943	0.404602	0.601702	1.17901	0.229007	0.443389
Zm00001eb008700	109.45	43.345	57.475	34.305	37.5	44.605	72.26	76.955	87.26	59.495	80.775	92.935	-1.67378	2.16716e-15	4.94744e-14	-0.208975	0.654682	0.927531	-0.365729	0.507464	0.81758	-0.280429	0.540299	0.874051	0.0698938	0.851421	1	0.0909016	0.678513	1	0.79435	8.83722e-05	0.000610818	1.10702	1.94539e-08	2.19215e-07	1.05902	0.00116094	0.00679612
Zm00001eb008710	12.01	1.59	1.05	4.17	3.195	2.58	2.15	1.91	2.655	4.87	2.655	3.885	-1.52612	7.78544e-05	0.000344477	1.00679	0.151367	0.442501	1.29698	0.118753	0.376481	1.17959	0.0220334	0.128056	0.475139	0.814903	1	0.549203	0.46455	0.927755	0.223874	0.601295	0.797701	-0.267104	0.864123	0.961227	0.590544	0.597072	0.808057
Zm00001eb008790	43.42	65.55	47.52	70.185	79.41	40.09	94.805	99.335	113.28	50.78	84.885	140.2	0.692803	0.0020847	0.00649855	0.276725	0.13563	0.411499	-0.245292	0.859416	1	-0.900703	0.0236815	0.1348	-0.226792	0.449091	0.875314	0.307593	0.306679	0.798031	-0.466902	0.271117	0.48574	0.0961889	0.505263	0.696847	1.80617	6.86156e-06	7.35566e-05
Zm00001eb008810	14.74	14.27	29.915	354.74	234.11	218.505	109.385	62.94	73.98	898.89	177.57	254.305	4.58895	3.5678e-76	8.49299e-73	4.03613	2.38006e-42	3.8917e-39	2.86873	5.71846e-16	1.90586e-13	3.03873	4.52105e-41	5.33998e-38	1.49634	1.38527e-08	7.55254e-07	1.78135	4.31761e-17	1.43666e-14	1.34138	3.23558e-12	7.23045e-11	-0.398799	0.104788	0.22668	0.218894	0.822271	0.957436
Zm00001eb008830	5.115	14.38	12.455	16.71	18.72	8.705	11.89	7.095	12.625	12.345	13.7	17.905	1.70791	1.93817e-06	1.17208e-05	0.380517	0.109642	0.360016	-0.516809	0.438182	0.769505	0.0541781	0.733953	0.975069	0.949301	0.0260039	0.169223	0.504079	0.24664	0.735416	-0.436785	0.466512	0.689852	-0.450405	0.155462	0.306135	1.04045	0.0768734	0.20125
Zm00001eb008850	20.655	8.105	10.16	8.685	11.72	16.82	14.78	12.945	12.71	8.545	11.975	17.785	-1.24989	8.84087e-05	0.000385895	0.532088	0.160262	0.45871	0.727277	0.00690627	0.052722	-0.790494	0.0646104	0.270224	-0.112369	0.70962	1	0.484697	0.128227	0.539037	-0.0234454	0.926844	1	0.0310531	0.811566	0.929984	0.0804833	0.852584	0.975353
Zm00001eb008870	0.001	0.001	0.001	0.001	0.001	0.001	1.665	1.7	3.25	2.03	1.34	2.565	0	1	1	0	1	1	0	1	1	0.285958	0.736581	0.976434	-0.343302	0.80368	1	-0.341481	0.695786	1	10.9873	0.0121026	0.0436974	10.388	0.0298781	0.0828452	11.3247	0.00463608	0.0215853
Zm00001eb008880	0.82	1.47	2.195	2.16	1.17	2.365	9.305	17.53	12.535	4.92	6.975	8.77	1.39734	0.11436	0.198958	-0.329308	1	1	0.107619	0.81799	0.997939	-0.919348	0.0770936	0.302701	-1.32956	0.00233265	0.0267839	-0.515313	0.169511	0.62256	1.18763	0.0287337	0.0887732	2.57568	1.97895e-05	0.000131889	1.89074	0.00225073	0.0118189
Zm00001eb008890	13.28	5.605	12.23	4.815	3.77	6.195	4.185	2.77	6.55	1.89	3.15	4.44	-1.46365	2.39519e-05	0.00011778	-0.57215	0.405057	0.759438	-0.981248	0.0480509	0.21161	-1.14684	0.122462	0.405167	0.185466	1	1	-0.560935	0.308334	0.799422	-1.34915	0.0451367	0.126957	-0.259213	0.75782	0.894233	-0.480545	0.241802	0.460196
Zm00001eb008910	3.605	2.145	1.605	0.28	2.39	0.795	1.42	1.23	1.77	0.82	1.345	0.58	-3.6865	5.68478e-05	0.000258341	0.156033	0.829157	1	-1.01355	0.509885	0.818866	-0.792195	0.754	0.984805	0.128948	1	1	-1.60962	0.179831	0.63901	1.5502	0.38664	0.612256	-0.829404	0.368893	0.565619	-0.454902	1	1
Zm00001eb008920	2.93	10.06	4.905	7.565	22.25	7.3	5.29	8.175	7.835	9.135	31.49	8.45	1.36844	0.00172923	0.00550782	1.14518	0.000599564	0.0062693	0.573643	0.119487	0.377808	0.788137	0.0883592	0.329982	1.9456	4.55421e-08	2.23645e-06	0.109018	0.852062	1	0.272065	0.446313	0.670321	0.501088	0.0224104	0.0651767	0.211055	0.922884	1
Zm00001eb008960	51.96	46.505	49.11	41.445	46.245	43.045	0.49	0.515	0.73	0.74	1.3	1.3	-0.326203	0.0924795	0.167398	-0.00808845	0.766085	0.98372	-0.190171	1	1	0.594744	1	1	1.33587	0.453248	0.875314	0.832543	0.727567	1	-5.80753	4.23383e-33	4.10329e-31	-5.15271	8.44028e-42	1.13605e-39	-5.04926	2.26408e-28	3.29318e-26
Zm00001eb008980	17.155	16.845	8.48	25	52.265	19.795	9.385	7.63	10.36	15.975	18.45	10.59	0.543299	0.0426084	0.0876197	1.63352	5.87073e-08	1.75131e-06	1.223	5.36975e-05	0.00104799	0.767387	0.00867858	0.0638847	1.27387	0.000515108	0.00787336	0.0316786	1	1	-0.646112	0.0452472	0.127172	-1.50222	6.57298e-08	6.87455e-07	-0.902433	0.00562348	0.0253459
Zm00001eb009010	38.06	31.765	24.115	47.56	234.275	183.59	4.185	13.72	7.535	9.44	21.02	8.62	0.321473	0.272711	0.397261	2.88269	7.62071e-32	4.43051e-29	2.92848	1.87478e-11	2.41271e-09	1.17356	0.0206418	0.122237	0.615482	0.160651	0.537739	0.19408	0.67617	1	-2.33289	3.09578e-10	5.45874e-09	-3.47837	3.5041e-50	7.56913e-48	-4.41266	9.63061e-34	2.13623e-31
Zm00001eb009050	2.51	5.975	3.08	1.34	4.165	1.815	6.095	5.975	8.875	4.695	4.96	6.535	-0.905454	0.17954	0.285617	-0.520622	0.364556	0.720791	-0.762961	0.503891	0.816197	-0.376501	0.694868	0.957074	-0.268599	0.666957	0.997223	-0.44156	0.281676	0.774593	1.80889	0.00391924	0.0168654	0.252024	0.620587	0.792778	1.84822	0.011446	0.0452376
Zm00001eb009090	298.06	321.99	220.845	71.215	73.02	88.9	176.54	140.715	146.54	60.46	70.67	71.215	-2.06535	9.79646e-23	4.93308e-21	-2.14065	1.02729e-15	1.01802e-13	-1.31278	0.000977	0.0115973	-1.54594	3.14146e-07	9.45897e-06	-0.993606	0.00113741	0.0149491	-1.04104	9.04893e-06	0.000349175	-0.2362	0.532205	0.744113	-0.0471938	0.968459	1	-0.320002	0.190825	0.39053
Zm00001eb009130	6.835	9.44	11.09	10.545	8.11	9.09	3.595	1.5	4.26	2.95	3.67	5.02	0.625546	0.117554	0.203555	-0.219085	0.774326	0.98784	-0.286907	0.845642	1	-0.285277	1	1	1.29082	0.134121	0.486762	0.236834	0.766658	1	-1.83777	0.00030216	0.00181506	-1.14392	0.0167964	0.0510544	-0.856593	0.0331016	0.105774
Zm00001eb009150	13.675	20.425	13.42	9.315	10.705	8.785	13.615	17.92	17.49	9.22	9.435	6.85	-0.553913	0.0713855	0.134748	-0.932051	0.00555277	0.0396105	-0.61127	0.257181	0.58392	-0.562358	0.244727	0.603957	-0.925476	0.0109083	0.0895887	-1.35235	0.000730979	0.0137977	-0.014789	0.930523	1	-0.18219	0.789807	0.916276	-0.358938	0.256013	0.477644
Zm00001eb009340	10.155	7.735	4.015	12.665	6.09	2.76	15.075	20.65	9.125	16.16	14.02	12.22	0.318657	0.558563	0.684907	-0.344959	0.659616	0.929426	-0.540732	0.710077	0.947824	0.100269	0.448484	0.812229	-0.558655	0.0944154	0.396773	0.421348	0.402171	0.880459	0.35158	0.283407	0.50085	1.20297	0.000264446	0.00136847	2.1465	0.000132168	0.0010335
Zm00001eb009360	7.58	9.455	11.29	6.09	5.405	3.565	8.905	3.39	7.14	7.875	4.82	4.9	-0.315756	0.392777	0.527466	-0.806783	0.131569	0.403671	-1.66307	0.000847436	0.0104309	-0.177336	1	1	0.507748	0.489113	0.902459	-0.543142	0.340566	0.833322	0.370838	0.320464	0.54298	-0.165261	0.898508	0.980982	0.45888	0.680687	0.867048
Zm00001eb009380	14.425	13.12	17.05	5.165	5.8	7.54	8.705	5.675	12.015	4.14	5.435	5.25	-1.48173	1.87036e-05	9.4039e-05	-1.17764	0.00912573	0.0580188	-1.17714	0.00860248	0.0614875	-1.07221	0.034238	0.175167	-0.0623404	1	1	-1.19445	0.00475799	0.0592273	-0.319138	0.690412	0.862557	-0.0937729	1	1	-0.522247	0.202114	0.406454
Zm00001eb009400	0.475	0.425	2.445	4.685	7.64	5.645	1.395	1.79	4.9	2.72	2.79	2.16	3.30205	7.56382e-06	4.10314e-05	4.16804	1.86858e-07	4.92305e-06	1.20714	0.015236	0.0945285	0.963342	0.172147	0.49635	0.640306	0.480983	0.894395	-1.18175	0.0719818	0.388402	-0.784442	0.228503	0.43199	-1.45331	0.00411337	0.0153578	-1.38594	0.0148876	0.0559794
Zm00001eb009410	0.001	0.001	0.001	0.001	0.001	0.001	4.045	6.145	7.745	3.67	7.82	6.265	0	1	1	0	1	1	0	1	1	-0.14036	1	1	0.347756	0.587583	0.956981	-0.305951	0.535657	0.958524	11.8416	0.00010383	0.000705803	12.933	6.40626e-12	1.10562e-10	12.6131	6.8149e-07	8.87036e-06
Zm00001eb009430	32.165	28.465	59.62	81.3	50.505	95.84	76.79	85.98	83.735	122.755	80.875	83.79	1.33776	3.83686e-09	3.68826e-08	0.827237	0.000484935	0.00527082	0.684832	0.00140972	0.0156012	0.676791	0.00028298	0.00387829	-0.0883073	0.651892	0.988758	0.0009473	1	1	0.594455	0.00265318	0.0120267	0.679268	0.000648724	0.00302825	-0.19385	0.208622	0.415341
Zm00001eb009490	4.035	3.695	3.495	3.67	3.495	2.085	6.54	6.625	12.72	6	6.11	5.24	-0.136789	0.785336	0.874395	-0.0802819	1	1	-0.745245	0.523944	0.829908	-0.124328	1	1	-0.116748	0.892837	1	-1.27946	0.00132273	0.0221342	0.709182	0.11726	0.265881	0.80588	0.077412	0.17855	1.32952	0.0931317	0.232049
Zm00001eb009500	9.785	13.32	12.245	13.55	13.715	10.64	20.685	25.755	25.08	23.485	30.635	29.525	0.469649	0.158161	0.258243	0.0421605	0.714023	0.959093	-0.202695	1	1	0.183155	0.254208	0.613732	0.250328	0.395039	0.828839	0.2354	0.427276	0.904612	0.793447	0.00111704	0.00574391	1.15943	1.65601e-06	1.36733e-05	1.47244	0.000155832	0.00119434
Zm00001eb009540	187.9	234.41	336.55	533.48	472.255	752.07	213.645	254.12	204.275	437.03	233.48	230.74	1.50547	1.60329e-08	1.40127e-07	1.01053	2.225e-06	4.62355e-05	1.16005	4.22274e-05	0.000866411	1.03252	3.47342e-07	1.03269e-05	-0.122211	0.512194	0.905696	0.175755	0.402737	0.880739	-0.287702	0.379397	0.60529	-1.01627	2.23263e-06	1.79906e-05	-1.7046	8.40127e-09	1.52749e-07
Zm00001eb009570	13.345	14.14	24.26	49.605	42.14	50.435	12.82	8.145	8.08	18.425	14.755	12.51	1.89419	2.5581e-14	5.1016e-13	1.57541	2.95117e-10	1.35454e-08	1.05585	0.000136686	0.00228067	0.523268	0.0353415	0.178598	0.857217	0.0209587	0.145004	0.630655	0.0807367	0.417585	-1.42882	5.58893e-08	7.18396e-07	-1.51399	3.8034e-10	5.3167e-09	-2.01134	7.13743e-10	1.54516e-08
Zm00001eb009580	40.145	24.05	30.89	16.375	17.1	19.195	18	15.6	21.495	8.74	13.59	17.23	-1.29373	1.10461e-07	8.45493e-07	-0.492041	0.143601	0.427192	-0.686409	0.0867495	0.309093	-1.04229	0.00799276	0.0598881	-0.199001	0.562849	0.940481	-0.319078	0.305748	0.798013	-0.90579	0.0140208	0.0494517	-0.331451	0.32552	0.519578	-0.155808	0.38358	0.622671
Zm00001eb009600	6.62	6.375	5.655	9.35	6.275	16.755	6.365	4.7	6.42	11.285	3.395	8.69	0.498135	0.232021	0.350713	-0.0228099	1	1	1.56699	0.00184327	0.0191869	0.826174	0.011856	0.0812442	-0.469249	0.473648	0.890728	0.436783	0.36815	0.856103	0.271368	0.309636	0.531369	-0.886204	0.105281	0.22758	-0.947164	0.044728	0.133278
Zm00001eb009620	11.73	5.9	23.175	34.815	28.04	41.37	21.69	12.12	24.98	36.05	16.03	21.17	1.56951	9.00827e-10	9.55373e-09	2.2487	5.17209e-12	3.07528e-10	0.836016	0.00435653	0.0370432	0.732969	0.000718742	0.0085242	0.403385	0.302076	0.732944	-0.238752	0.399178	0.878651	0.0502902	0.556184	0.764393	-0.806712	0.00323044	0.012435	-0.966564	0.000296453	0.00208554
Zm00001eb009640	28.035	43.795	36.215	56.68	48.06	18.7	30.89	23.57	30.395	24.02	24.65	29.14	1.01561	8.24162e-05	0.00036191	0.13407	0.410108	0.764845	-0.953549	0.00720058	0.05446	-0.362904	0.597842	0.909379	0.0646359	0.922095	1	-0.0608331	0.893199	1	-1.2386	0.00146571	0.00718985	-0.963249	4.97855e-05	0.000304662	0.639963	0.248183	0.467691
Zm00001eb009680	109.83	149.685	228.095	124.83	126.785	141.6	507.355	430.48	538.17	455.42	444.335	450.365	0.184693	0.510903	0.641446	-0.239546	0.511508	0.840582	-0.687814	0.0497566	0.216408	-0.155798	0.940636	1	0.0457016	0.937411	1	-0.256967	0.181767	0.641402	1.86723	6.34651e-20	2.77844e-18	1.80926	3.03299e-22	1.30399e-20	1.66927	2.59969e-09	5.14106e-08
Zm00001eb009730	8.705	8.845	3.505	23.245	22.79	10.91	5.755	7.19	6.845	22.59	23.98	15.94	1.417	7.40499e-07	4.84897e-06	1.36547	3.68045e-06	7.26701e-05	1.63816	6.01136e-05	0.00115671	1.9728	1.70796e-09	8.12946e-08	1.73777	6.96775e-07	2.56989e-05	1.21953	0.00656639	0.0757104	-0.0412362	0.880604	0.978528	0.0734307	0.599341	0.776988	0.547001	0.415806	0.654559
Zm00001eb009780	22.61	30.335	30.05	73.685	67.36	37.6	52.98	33.18	45.4	62.96	70.525	59.795	1.70441	4.034e-14	7.80712e-13	1.15091	1.12682e-05	0.000199053	0.323368	0.0821652	0.297447	0.248988	0.127875	0.412988	1.08782	0.000257995	0.00438844	0.397333	0.0951925	0.459102	-0.226935	0.604084	0.800289	0.0662426	0.626649	0.797931	0.669292	0.0849689	0.216867
Zm00001eb009840	2.905	9.805	5.69	4.665	3.26	4.765	8.61	12.075	18.65	13.99	18.915	16.71	0.683339	0.279154	0.404374	-1.58865	0.00299375	0.0241363	-0.255952	1	1	0.700311	0.0187767	0.114292	0.647508	0.0484157	0.259131	-0.158464	0.700719	1	1.58445	5.32815e-05	0.000387817	2.53659	6.19313e-13	1.22513e-11	1.81016	0.000315214	0.00219873
Zm00001eb009850	2.925	6.295	3.87	2.72	1.345	1.395	0.001	0.001	0.001	0.001	0.001	0.001	-0.10483	1	1	-2.2266	0.00112954	0.0107341	-1.47207	0.115692	0.371353	0	1	1	0	1	1	0	1	1	-11.4094	0.000502844	0.00284729	-10.3934	0.0172536	0.0522072	-10.446	0.0387097	0.119708
Zm00001eb009890	11.325	31.685	32.17	12.035	22.29	10.87	26.845	23.405	24.02	11.025	10.68	15.05	0.0877251	0.892698	0.955107	-0.507403	0.119633	0.382013	-1.56536	6.67355e-06	0.000179406	-1.28387	0.000142647	0.00216007	-1.13191	0.00356919	0.0377414	-0.674473	0.0213237	0.17676	-0.126457	1	1	-1.06148	0.000459571	0.00223365	0.469412	0.452921	0.688788
Zm00001eb009900	239.64	50.35	39.005	35.7	36.115	24.425	40.685	27.645	47.27	30.08	40.22	42.22	-2.74687	3.34277e-35	5.05956e-33	-0.479394	0.104296	0.348804	-0.675301	0.0696328	0.268126	-0.435692	0.246515	0.606785	0.540895	0.0542779	0.279805	-0.162998	0.489785	0.942878	-0.24712	0.545154	0.755549	0.155315	0.347085	0.542618	0.789568	0.027212	0.0906886
Zm00001eb009910	40.77	30.25	25.2	19.325	25.965	14.895	9.27	7.765	12.175	10.35	10.56	19.88	-1.07704	3.90297e-06	2.23337e-05	-0.220367	0.589748	0.890876	-0.758596	0.072487	0.275051	0.15899	0.450966	0.814122	0.443552	0.281312	0.711493	0.707396	0.0293751	0.220868	-0.900838	0.0081862	0.0314797	-1.29796	1.95038e-06	1.59271e-05	0.41649	0.486326	0.719648
Zm00001eb009920	76.65	12.725	7.37	9.275	7.59	5.855	12.71	10.415	15.125	9.615	12.485	15.255	-3.04687	1.81403e-33	2.39901e-31	-0.745494	0.0886317	0.312294	-0.331995	0.799814	0.990947	-0.402605	0.5054	0.850791	0.261533	0.576492	0.951009	0.012347	1	1	0.0519396	0.790139	0.929102	0.718024	0.0307588	0.084883	1.38154	0.00411117	0.0195134
Zm00001eb009930	1.63	0.5	1.475	1.14	1.56	14.61	1.73	0.001	0.88	0.45	0.85	2.64	-0.515838	0.647843	0.763263	1.64155	0.186403	0.502181	3.30817	1.41745e-09	1.18103e-07	-1.94278	0.179838	0.509606	9.73132	0.125056	0.467948	1.58496	0.13536	0.552902	-1.34104	0.312114	0.533773	-0.876011	0.394383	0.591377	-2.46835	2.07988e-06	2.47374e-05
Zm00001eb009950	46.88	20.565	96.785	14.685	12.49	37.21	85.405	72.53	68.03	36.97	22.415	58.96	-1.67463	1.97408e-05	9.87415e-05	-0.719418	0.0961591	0.330667	-1.37909	1.36094e-05	0.000332822	-1.20797	9.06402e-05	0.00146655	-1.69411	2.69565e-12	3.00392e-10	-0.206435	0.41864	0.896803	1.33201	2.04363e-06	1.9958e-05	0.843691	0.00561612	0.020017	0.664046	0.063978	0.176491
Zm00001eb009990	17.215	28.31	31.66	20.565	25.34	27.18	12.72	20.05	17.145	12.73	9.55	9.865	0.256525	0.393464	0.528162	-0.159895	0.832947	1	-0.220116	0.963615	1	0.00113375	0.693291	0.955974	-1.07003	0.00113994	0.0149748	-0.797397	0.0128012	0.123648	-0.691959	0.036941	0.108479	-1.40784	1.15297e-05	8.05067e-05	-1.46215	6.60323e-06	7.10161e-05
Zm00001eb010040	61.15	107.835	55.635	35.5	84.575	49.515	83.9	102.395	134.595	60.86	126.72	110.345	-0.784533	0.00019156	0.000774552	-0.350522	0.286712	0.638435	-0.168127	0.962866	1	-0.463176	0.15894	0.471306	0.307499	0.346432	0.78335	-0.286604	0.38406	0.868401	0.777675	0.000147643	0.000968205	0.583341	0.00558937	0.0199323	1.15608	0.00152242	0.00854029
Zm00001eb010050	2.335	4.16	3.47	3.165	4.34	2.175	8.605	3.71	5.705	7.86	5.855	4.86	0.438783	0.526935	0.656347	0.0611115	1	1	-0.67392	0.523944	0.829908	-0.130646	1	1	0.65825	0.268493	0.693328	-0.231271	0.784195	1	1.31232	0.0107563	0.0395763	0.431974	0.29771	0.488553	1.15994	0.141209	0.314405
Zm00001eb010060	0.765	20.575	6.825	10.03	22.465	5.265	6.12	14.585	8.125	8.2	19.975	8.875	3.71272	1.21076e-11	1.68996e-10	0.126787	0.439316	0.78887	-0.374396	0.782145	0.982348	0.422092	0.165041	0.483003	0.45371	0.159769	0.53604	0.127379	0.840778	1	-0.290626	0.64205	0.829065	-0.169484	0.69183	0.845133	0.753314	0.293102	0.521789
Zm00001eb010070	11.64	4.955	1.685	2.56	2.82	1.395	3.465	2.25	4.235	2.87	2.065	2.425	-2.18488	1.94131e-07	1.42151e-06	-0.81319	0.194813	0.515494	-0.272483	1	1	-0.271805	0.850714	1	-0.123783	1	1	-0.804377	0.278298	0.770876	0.164907	0.72215	0.885098	-0.449553	0.694286	0.846949	0.79772	0.639279	0.837566
Zm00001eb010090	0.001	0.001	0.001	0.001	0.001	0.001	2.975	2.83	2.145	1.04	1.86	3.02	0	1	1	0	1	1	0	1	1	-1.51631	0.0964796	0.348585	-0.605499	0.480983	0.894395	0.493571	0.675028	1	10.0224	0.067633	0.17498	10.8611	0.00227829	0.00917104	11.5603	0.00121056	0.00704478
Zm00001eb010100	8.075	11.995	9.265	3.05	3.515	2.45	1.28	1.305	0.95	0.815	0.001	0.001	-1.40465	0.00144036	0.00468588	-1.77084	9.2184e-05	0.001272	-1.91901	0.000405435	0.00568664	-0.651272	1	1	-10.3498	0.0625469	0.30505	-9.89178	0.128087	0.538707	-1.90394	0.024165	0.0771796	-11.7793	3.38078e-05	0.000214889	-11.2586	0.00290909	0.0147213
Zm00001eb010110	20.835	41.78	22.225	5.04	4.395	2.065	22.355	106.395	31.885	9.92	27.625	7.8	-2.04751	8.96863e-10	9.5194e-09	-3.24888	1.27188e-20	2.52083e-18	-3.42797	1.53349e-11	2.02358e-09	-1.17219	0.000748906	0.00881755	-1.94538	2.28648e-14	3.54191e-12	-2.03133	3.19682e-11	4.46076e-09	0.976916	0.00753198	0.0293179	2.65204	7.06787e-17	2.03562e-15	1.91733	0.00366003	0.01771
Zm00001eb010130	8.18	2.97	2.51	4.015	3.015	2.125	12.88	15.52	12.705	6.9	11.555	9.93	-1.0267	0.0132093	0.0323622	0.0216951	1	1	-0.240225	1	1	-0.900464	0.0341347	0.174828	-0.425611	0.22529	0.646207	-0.355531	0.418382	0.896598	0.781196	0.0538005	0.146385	1.93829	2.47818e-06	1.98202e-05	2.22433	0.000978609	0.00587077
Zm00001eb010140	92.295	90.43	82.925	107.19	75.75	106.9	75.885	70.525	57.32	79.975	56.52	51.38	0.215846	0.380846	0.514707	-0.255556	0.474597	0.815208	0.366383	0.0360361	0.17419	0.0757343	0.449665	0.81323	-0.319373	0.161946	0.539901	-0.157832	0.503331	0.944807	-0.422549	0.252764	0.464113	-0.422484	0.083665	0.189784	-1.05698	2.26351e-05	0.000217824
Zm00001eb010150	63.975	53.66	73.67	66.96	63.915	61.875	23.215	20.18	22.72	25.305	30.335	39.715	0.0657913	0.901701	0.962224	0.252307	0.148561	0.437003	-0.251721	0.834707	1	0.124365	0.382598	0.75615	0.588057	0.0341898	0.204762	0.805721	0.00107055	0.0187231	-1.40388	4.77001e-07	5.2594e-06	-1.07517	1.25828e-06	1.05818e-05	-0.639673	0.0034904	0.0170005
Zm00001eb010200	28.035	12.965	15.455	10.885	7.85	11.77	14.795	8.055	17.365	7.95	10.76	15.375	-1.36489	3.35193e-07	2.34617e-06	-0.723858	0.0860627	0.306385	-0.392959	0.623903	0.898014	-0.896083	0.0448138	0.210167	0.417722	0.384094	0.818923	-0.175596	0.614956	0.996173	-0.453315	0.375415	0.601517	0.454914	0.158019	0.310121	0.385472	0.624777	0.82812
Zm00001eb010210	3.415	5.025	8.135	20.045	15.475	29.93	10.695	6.99	11.835	38.45	15.455	22.405	2.55328	3.10172e-12	4.73853e-11	1.62274	5.76288e-05	0.000846538	1.87938	7.12679e-08	3.59047e-06	1.84605	5.26114e-10	2.72332e-08	1.14471	0.00407885	0.0416935	0.920761	0.00431603	0.0548302	0.939741	0.000190605	0.00121104	-0.00186576	0.90506	0.985464	-0.417772	0.092355	0.230416
Zm00001eb010240	15.66	2.2	2.115	0.915	1.58	0.74	2.205	0.001	1.65	0.54	1.26	1.75	-4.09717	1.29944e-16	3.46495e-15	-0.477579	0.634573	0.916942	-1.51506	0.226829	0.546604	-2.02975	0.146181	0.44684	10.2992	0.0625469	0.30505	0.0848889	1	1	-0.760812	1	1	-0.326501	1	1	1.24176	0.36601	0.604371
Zm00001eb010300	32.55	19.615	17.1	13.77	16.165	11.21	15.045	12.78	19.42	9.34	12.645	18.57	-1.24113	5.89477e-07	3.93963e-06	-0.279084	0.520165	0.846199	-0.60921	0.234208	0.557144	-0.68779	0.117617	0.395125	-0.0153208	0.933184	1	-0.0645694	0.892383	1	-0.560034	0.163972	0.339113	-0.354306	0.306945	0.499365	0.728188	0.126031	0.290324
Zm00001eb010320	44.745	65.12	83.385	98.85	94.93	139.785	75.68	98.625	89.15	66.3	66.645	69.79	1.14351	9.96792e-07	6.35989e-06	0.543763	0.00695773	0.0472151	0.74535	0.0031275	0.0288103	-0.190903	0.833132	1	-0.565457	0.00973593	0.0822131	-0.353214	0.113988	0.506759	-0.576232	0.0265008	0.0831715	-0.510367	0.0274801	0.0772759	-1.00212	0.000353141	0.00242578
Zm00001eb010340	13.505	38.995	5.77	48.99	46.73	24.545	30.55	223.165	21.43	54.595	39.9	15.54	1.85899	2.91051e-12	4.4699e-11	0.26106	0.201757	0.526323	2.08879	4.40407e-06	0.000126227	0.837596	0.000290532	0.00396091	-2.48365	2.66969e-20	9.8049e-18	-0.463645	0.229483	0.710435	0.156282	0.319292	0.541754	-0.22796	0.46064	0.655488	-0.659443	0.0613305	0.170531
Zm00001eb010360	15.72	29.865	24.31	46.5	31.62	23.245	37.02	46.205	34.4	36.325	35.375	50.88	1.56463	1.63871e-10	1.94601e-09	0.0823816	0.500655	0.834965	-0.0646295	0.705265	0.945006	-0.0273421	0.681964	0.951658	-0.385319	0.0777471	0.350325	0.56469	0.0135006	0.128822	-0.356268	0.276306	0.492695	0.161893	0.343427	0.538881	1.13018	0.000531399	0.00346516
Zm00001eb010390	1.33	11.595	2.365	14.245	15.13	9.415	10.16	7.05	11.675	14.29	18.635	14.145	3.42096	1.51797e-14	3.11505e-13	0.383909	0.152187	0.443931	1.99312	0.000407121	0.00569879	0.492106	0.0617341	0.263495	1.40232	0.0316644	0.193413	0.27687	0.427705	0.904871	0.00455029	0.780976	0.923697	0.300603	0.186606	0.35142	0.587259	0.274157	0.499244
Zm00001eb010420	3.475	7.725	4.37	14.155	17.71	3.105	6.245	4.45	4.72	8.805	7.03	5.985	2.02623	5.17316e-08	4.18213e-07	1.19696	0.00087189	0.0086262	-0.49304	0.711488	0.947824	0.495621	0.142897	0.442354	0.659719	0.304515	0.735377	0.342564	0.674148	1	-0.684917	0.0980031	0.231519	-1.33297	0.00172178	0.00719616	0.946758	0.314325	0.546522
Zm00001eb010430	6	8.85	3.77	6.33	7.17	1.39	18.605	9.175	14.075	11.83	7.85	8.815	0.077243	1	1	-0.303704	0.634294	0.916942	-1.43948	0.115692	0.371353	-0.65324	0.0997342	0.355695	-0.225016	0.586935	0.956729	-0.675102	0.154995	0.592884	0.902173	0.0131597	0.0469911	0.13072	0.759018	0.894989	2.66488	0.00140913	0.00800259
Zm00001eb010440	5.14	15.66	9.81	6.56	7.115	2.55	15.125	7.805	12.4	6.245	4.88	8.015	0.351927	0.531538	0.66045	-1.13815	0.00242711	0.0202594	-1.94376	0.000390135	0.00550594	-1.27616	0.00187727	0.0187917	-0.677517	0.160299	0.536992	-0.629566	0.15614	0.595599	-0.0709942	1	1	-0.543983	0.282787	0.471465	1.65221	0.0134986	0.0517458
Zm00001eb010460	13.925	16.115	24.925	26.055	18.475	22.26	9.995	8.43	8.945	6.195	9.135	13.57	0.903883	0.00116936	0.00389612	0.19717	0.330793	0.688425	-0.16314	0.955291	1	-0.690102	0.209361	0.556328	0.115872	0.856955	1	0.601267	0.145714	0.573877	-2.07238	3.0176e-09	4.655e-08	-1.0161	0.00167404	0.00701379	-0.714033	0.0164816	0.0607701
Zm00001eb010500	2.385	1.935	2.385	7.23	15.01	8.285	4.965	2.62	3.87	10.9	12.45	13.435	1.60001	0.00151378	0.00489846	2.95552	1.1485e-10	5.62679e-09	1.79651	0.000224012	0.0034622	1.13446	0.00451587	0.0385749	2.24851	1.03403e-05	0.000277973	1.79559	0.000195365	0.00461768	0.592261	0.0924371	0.22148	-0.269778	0.498594	0.691066	0.697423	0.250557	0.470838
Zm00001eb010590	4.57	5.295	5.235	5.31	3.465	3.435	9.41	10.145	8.13	8.385	8.21	8.115	0.216518	0.726789	0.82855	-0.611775	0.363703	0.720188	-0.607879	0.610847	0.889612	-0.166384	1	1	-0.305315	0.445588	0.874386	-0.00266426	1	1	0.659099	0.0659444	0.171774	1.24453	0.00351817	0.0134134	1.24028	0.0548637	0.156289
Zm00001eb010610	5.34	7.81	8.17	12.35	7.15	6.01	11.06	8.97	14.28	17.69	11.32	19.46	1.2096	0.000658534	0.00232929	-0.127379	1	1	-0.442971	0.631617	0.900144	0.677583	0.0136489	0.0904547	0.335694	0.467457	0.886051	0.446516	0.147556	0.577024	0.518423	0.0508547	0.139835	0.662859	0.0376391	0.100255	1.69507	0.000303144	0.00212568
Zm00001eb010620	42.12	67.24	78.83	85.865	95.48	111.755	64.465	74.48	74.145	78.52	71.75	70.965	1.02756	1.85187e-06	1.12482e-05	0.505879	0.00912913	0.0580263	0.503523	0.00826387	0.0594957	0.284544	0.0535864	0.23825	-0.0538742	0.73929	1	-0.0632417	0.786044	1	-0.12901	0.89644	0.987272	-0.41222	0.0688009	0.162278	-0.65516	0.00268242	0.0137441
Zm00001eb010680	13.775	4.125	4.425	3.485	4.71	2.85	4.46	6.905	6.025	4.1	4.565	3.505	-1.98282	3.89453e-07	2.69356e-06	0.191333	0.660627	0.929912	-0.634716	0.572149	0.86425	-0.12142	1	1	-0.597027	0.1841	0.579101	-0.781547	0.165557	0.61419	0.234465	0.669527	0.847425	-0.0451122	1	1	0.298453	1	1
Zm00001eb010690	20.79	12.345	13.09	8.88	10.375	9.315	10.41	11.85	14.11	10.055	11.095	14.68	-1.22726	1.35529e-05	6.99827e-05	-0.250816	0.760107	0.980783	-0.490837	0.45092	0.781971	-0.050057	0.856208	1	-0.0949774	0.777555	1	0.057134	0.936201	1	0.179281	0.47409	0.696222	0.0967983	0.677437	0.835296	0.656224	0.209469	0.416372
Zm00001eb010700	41.425	69.2	47.615	35.895	34.455	19.765	27.735	16.63	30.17	15.77	20.205	32.415	-0.206719	0.26023	0.383229	-1.00606	0.000254222	0.00301221	-1.26847	8.07528e-05	0.00148567	-0.814525	0.0188948	0.114769	0.280924	0.478265	0.894395	0.103547	0.705519	1	-1.1866	1.49733e-05	0.000124269	-0.770001	0.00499837	0.0181288	0.713714	0.0727031	0.193948
Zm00001eb010730	2.465	20.88	3.425	23.67	72.665	4.76	5.955	62.38	10.775	21.645	58.545	19.72	3.2634	8.61895e-20	3.29952e-18	1.79914	1.0811e-09	4.46116e-08	0.474858	0.359279	0.696426	1.86186	4.24269e-07	1.23872e-05	-0.0915376	0.675374	1	0.871972	0.0983507	0.466199	-0.129026	0.964493	1	-0.311715	0.33821	0.533414	2.05063	0.00324527	0.0160057
Zm00001eb010740	15.825	23.275	20.47	17.79	24.555	8.725	17.645	17.525	20.545	10.135	15.555	15.75	0.168861	0.692601	0.801332	0.0772357	0.538721	0.859548	-1.23028	0.00245114	0.0238205	-0.799913	0.128981	0.415594	-0.172036	0.546853	0.93141	-0.383436	0.45602	0.924828	-0.81172	0.0678818	0.175437	-0.658638	0.015617	0.048208	0.852125	0.250626	0.470859
Zm00001eb010830	5.9	6.29	4.55	12.445	6.52	4.15	9.09	4.645	12.185	6.94	6.475	8.9	1.07678	0.00446602	0.012685	0.0518119	0.821454	1	-0.132755	1	1	-0.389345	0.638314	0.92835	0.479202	0.400405	0.833612	-0.453229	0.236154	0.720229	-0.842559	0.0757267	0.190754	-0.00999177	1	1	1.10069	0.104528	0.252275
Zm00001eb010850	0.001	0.48	0.001	0.001	0.001	0.001	4.805	6.435	4.615	7.895	5.44	5.17	0	1	1	-8.90689	0.503874	0.834965	0	1	1	0.716403	0.064485	0.26996	-0.242333	0.667044	0.997239	0.163834	0.879298	1	12.9467	2.15952e-11	4.39946e-10	12.4094	1.21162e-08	1.40186e-07	12.3359	7.13911e-06	7.61639e-05
Zm00001eb010890	9.115	6.05	6.975	2.39	1.66	2.045	1.88	0.87	0.465	0.445	0.001	0.001	-1.93123	6.3181e-05	0.000284211	-1.86575	0.00777082	0.0514225	-1.77009	0.0063592	0.0497633	-2.07886	0.109509	0.377365	-9.76487	0.252851	0.674626	-8.86109	0.504553	0.944807	-2.42513	0.0161985	0.0556934	-10.697	0.00845514	0.0285264	-10.9979	0.00564377	0.025406
Zm00001eb010960	5.345	6.75	3.215	4.665	9.75	4.945	2.225	2.03	4.775	9.575	5.5	2.1	-0.196313	0.638902	0.755938	0.530515	0.134774	0.409853	0.621152	0.226834	0.546604	2.10547	8.52943e-06	0.000181076	1.43795	0.0311411	0.19159	-1.18511	0.0743586	0.3971	1.0374	0.00518247	0.0213238	-0.825971	0.0457147	0.117174	-1.23558	0.0712887	0.191383
Zm00001eb010970	0.001	3.895	1.775	6.125	0.001	1.5	2.985	0.815	0.001	0.001	0.001	2.775	12.5805	6.89534e-10	7.45785e-09	-11.9274	0.00245001	0.0203937	-0.242857	1	1	-11.5435	0.000245598	0.00345153	-9.67066	0.252426	0.674251	11.4383	0.000980479	0.017562	-12.5805	8.49774e-09	1.2367e-07	0	1	1	0.887525	0.586592	0.799709
Zm00001eb010980	17.64	16.82	19.335	12.965	11.235	10.54	29.165	21.035	27.805	17.02	20.195	25.41	-0.444228	0.0985972	0.176591	-0.582178	0.137177	0.413936	-0.87534	0.0404405	0.187764	-0.777007	0.0235812	0.134377	-0.0587937	0.7889	1	-0.129948	0.624302	0.999434	0.392609	0.103557	0.241799	0.845998	0.00124423	0.00540054	1.26952	0.00140746	0.00799827
Zm00001eb011030	0.95	0.275	0.295	0.485	0.655	1.035	4.24	3.005	5.835	3.29	5.35	5.935	-0.969943	0.527636	0.656881	1.25206	0.62813	0.91424	1.81084	0.375129	0.710367	-0.365977	0.737207	0.976765	0.832174	0.239507	0.663207	0.0245154	1	1	2.76203	0.00123471	0.00623979	3.02997	0.000236175	0.00123723	2.51962	0.00301323	0.0151021
Zm00001eb011050	17.345	47.985	19.88	18.195	48.435	9.23	72.695	72.87	61.425	53.165	54.605	53.98	0.0690222	0.933291	0.987522	0.0134664	0.764707	0.982873	-1.10692	0.00613773	0.0483505	-0.451379	0.229217	0.583999	-0.416292	0.0568314	0.288989	-0.186401	0.57408	0.978957	1.54693	5.02018e-09	7.54409e-08	0.172983	0.272948	0.460008	2.54802	2.01675e-08	3.42796e-07
Zm00001eb011080	14.025	5.28	13.32	9.95	15.715	31.565	23.53	18.87	22.03	9.39	9.725	15.005	-0.495232	0.143999	0.23954	1.57353	6.45703e-05	0.000932793	1.24473	2.28091e-06	7.1978e-05	-1.3253	0.000297789	0.00404709	-0.956324	0.00252692	0.0285494	-0.554026	0.116443	0.512927	-0.0835714	1	1	-0.692372	0.0603135	0.146484	-1.07288	0.000705953	0.00442048
Zm00001eb011120	0.001	0.001	0.001	0.001	0.21	0.001	13.92	5.225	13.705	17.57	9.765	9.975	0	1	1	7.71425	1	1	0	1	1	0.335955	0.161467	0.476516	0.902189	0.0603345	0.300646	-0.458314	0.231934	0.714862	14.1008	4.82413e-19	1.99753e-17	5.53916	8.27528e-13	1.60851e-11	13.2841	2.54776e-09	5.04586e-08
Zm00001eb011170	1.34	0.605	0.001	0.235	0.36	0.001	3.88	5.12	5.315	2.005	8.37	4.25	-2.5115	0.0733589	0.137936	-0.748938	1	1	0	1	1	-0.952454	0.229969	0.584311	0.709084	0.155685	0.527913	-0.322607	0.643294	1	3.09287	0.0142585	0.0501644	4.53916	8.1411e-10	1.09633e-08	12.0532	4.84037e-05	0.000427192
Zm00001eb011180	12.83	14.97	13.23	17.87	15.79	12.285	0.001	0.001	0.001	0.24	0.27	0.001	0.478018	0.128902	0.219446	0.0769369	0.695802	0.949483	-0.106915	0.863697	1	7.90689	1	1	8.07682	1	1	0	1	1	-6.21836	8.94345e-19	3.58663e-17	-5.86991	5.1082e-19	1.72539e-17	-13.5846	7.6521e-13	2.49002e-11
Zm00001eb011200	40.685	24.44	23.89	17.69	20.42	18.975	14.33	10.055	13.455	13.33	15.3	13.77	-1.20156	5.95049e-07	3.97484e-06	-0.259261	0.572757	0.881107	-0.332307	0.70404	0.944555	-0.104362	1	1	0.605619	0.0907416	0.386972	0.0333862	1	1	-0.408257	0.336006	0.560584	-0.416451	0.203568	0.374541	-0.462571	0.0797143	0.206686
Zm00001eb011230	9.17	4.475	2.89	2.235	1.78	1.98	6.28	4.245	5.87	2.94	3.95	3.35	-2.03665	1.61149e-05	8.19677e-05	-1.33001	0.0450445	0.195044	-0.545569	0.647933	0.91114	-1.09495	0.0687647	0.282015	-0.103912	0.862272	1	-0.809199	0.112633	0.503493	0.395541	0.580481	0.781824	1.14998	0.0746146	0.173395	0.758661	0.555785	0.774752
Zm00001eb011280	3.085	24.07	2.675	8.32	11.345	0.655	10.325	3.735	10.01	7.695	3.97	8.35	1.43131	0.0114588	0.028658	-1.08518	0.0280827	0.13857	-2.02997	0.0990119	0.336578	-0.424149	0.635154	0.926774	0.0880308	1	1	-0.261594	0.764004	1	-0.112662	1	1	-1.51485	0.000791544	0.00362246	3.67221	0.00360234	0.0174753
Zm00001eb011290	0.835	1.185	2.29	3.685	2.1	2.04	3.51	1.69	2.51	4.855	1.825	4.505	2.14182	0.00368992	0.0107476	0.825502	0.3175	0.673022	-0.166778	1	1	0.468	0.266259	0.628149	0.110873	1	1	0.84384	0.201765	0.671965	0.397807	0.392471	0.617941	-0.202493	1	1	1.14296	0.210217	0.417299
Zm00001eb011310	17.52	42.725	44.965	40.925	36.42	41.82	60.48	63.94	58.14	46.115	52.14	50.58	1.22398	1.87819e-07	1.37876e-06	-0.23035	0.598731	0.897014	-0.104609	0.747985	0.967956	-0.391222	0.275527	0.638645	-0.294328	0.184088	0.579101	-0.200964	0.358049	0.848921	0.172254	0.245223	0.454445	0.51766	0.00579465	0.0205876	0.274374	0.697472	0.878873
Zm00001eb011350	2.22	5.675	3.62	5.325	4.15	4.22	3.6	3.6	2.47	3	3.6	2.6	1.26222	0.0155025	0.0371054	-0.451509	0.496345	0.832089	0.221253	0.478926	0.803755	-0.263034	1	1	0	1	1	0.0740006	1	1	-0.827819	0.148844	0.316237	-0.205114	0.878256	0.969626	-0.698731	0.238708	0.456658
Zm00001eb011380	3.125	1.18	3.225	4.88	5.45	9.015	5.115	2.955	1.085	4.74	2.52	4.155	0.643025	0.305185	0.433365	2.20747	0.00158322	0.0141029	1.48303	0.000896334	0.0108478	-0.109847	1	1	-0.229734	0.837196	1	1.93715	0.0208	0.17336	-0.0419941	1	1	-1.11283	0.0943552	0.208747	-1.11748	0.0184605	0.0666734
Zm00001eb011400	1.345	4.425	4.845	11.225	18.07	10.685	0.001	0.001	0.001	0.001	0.39	0.001	3.06104	4.62632e-06	2.61472e-05	2.02985	1.98683e-05	0.00032961	1.14102	0.0440682	0.198337	0	1	1	8.60733	0.500038	0.902459	0	1	1	-13.4544	2.6316e-09	4.09498e-08	-5.53398	4.40772e-13	8.8435e-12	-13.3833	1.76487e-07	2.53383e-06
Zm00001eb011420	124.41	29.145	34.69	29.855	30.435	24.915	24.09	24.24	26.925	19.63	20.39	19.63	-2.05906	9.71239e-20	3.68045e-18	0.062483	0.606821	0.902287	-0.477505	0.307408	0.641448	-0.295374	0.618688	0.920762	-0.249528	0.343672	0.781087	-0.455886	0.0913956	0.448239	-0.604912	0.0622604	0.164241	-0.57787	0.0298579	0.0827977	-0.343954	0.104466	0.252192
Zm00001eb011430	2.32	1.515	1.33	2.78	1.23	0.61	2.59	1.93	4.855	0.805	0.24	0.41	0.26096	0.737259	0.836879	-0.300659	1	1	-1.12455	0.743784	0.965998	-1.68589	0.127671	0.412602	-3.00749	0.0703946	0.32748	-3.56578	0.00228782	0.033661	-1.78802	0.0469522	0.13088	-2.35755	0.127509	0.263013	-0.573185	1	1
Zm00001eb011440	2.07	1.355	3.74	2.48	1.1	0.545	2.315	1.725	1.09	2.225	0.21	0.365	0.260709	0.85909	0.930172	-0.300789	1	1	-2.77871	0.00566953	0.0454332	-0.0572069	1	1	-3.03814	0.125098	0.467948	-1.57836	0.409421	0.887135	-0.156535	1	1	-2.38904	0.220575	0.396375	-0.57836	1	1
Zm00001eb011490	147.565	56.575	65.35	65.565	63.83	60.965	61.375	49.14	66.595	54.1	63.895	64.56	-1.17035	3.35514e-09	3.25025e-08	0.17407	0.269991	0.61918	-0.100206	0.740391	0.963854	-0.182023	0.860709	1	0.378805	0.138972	0.496619	-0.0447733	0.860658	1	-0.277297	0.418864	0.643402	0.00146839	0.788249	0.914983	0.0826593	0.818309	0.954754
Zm00001eb011500	0.75	3.105	2.755	4.435	3.72	2.76	3.05	2.725	4.095	4.585	2.845	3.785	2.56397	0.00021749	0.000867081	0.260709	0.615181	0.906761	0.00261595	0.832003	1	0.588112	0.242082	0.600984	0.0621724	1	1	-0.11357	1	1	0.0479876	0.791524	0.930123	-0.386874	0.734088	0.87654	0.455625	0.726044	0.89877
Zm00001eb011530	2.54	7.345	6.275	13.435	9.62	5.46	6.975	6.63	8.715	9.16	10.38	9.55	2.4031	7.57586e-10	8.12675e-09	0.389274	0.25895	0.604986	-0.200715	1	1	0.393154	0.232954	0.588786	0.646726	0.144281	0.505885	0.132	0.826807	1	-0.552577	0.230552	0.434634	0.109698	0.666337	0.827899	0.8066	0.198595	0.401078
Zm00001eb011560	3.95	3.2	2.41	1.26	1.395	1.06	2.515	1.265	2.14	1.99	1.685	0.705	-1.64843	0.01173	0.0292501	-1.19781	0.219466	0.552365	-1.18497	0.424291	0.757156	-0.33779	0.823937	1	0.413611	0.774516	1	-1.60192	0.159797	0.604044	0.659345	0.474099	0.696222	0.272483	0.807389	0.92664	-0.588369	0.749273	0.914198
Zm00001eb011600	4.67	13.24	21.71	11.94	9.92	11.685	10.12	12.365	18.25	8.41	11.745	11.12	1.35431	0.000367822	0.00138323	-0.416491	0.366391	0.72278	-0.893702	0.0257033	0.138254	-0.267032	0.765053	0.990479	-0.0742155	0.859855	1	-0.71474	0.0457028	0.292954	-0.505625	0.251288	0.462163	0.243635	0.380813	0.577613	-0.0715009	0.63116	0.83227
Zm00001eb011640	5.86	9.575	10.74	13.895	10.36	9.995	9.085	7.74	11.17	13.28	9.685	12.67	1.24559	0.000238513	0.000940581	0.11368	0.649511	0.924112	-0.103716	0.921403	1	0.547697	0.0511006	0.23077	0.323418	0.495421	0.902459	0.181787	0.652695	1	-0.0653107	0.943307	1	-0.0972	1	1	0.342138	0.687506	0.871367
Zm00001eb011670	207.49	98.58	110.115	87.965	64.875	106.325	127.515	92.14	71.4	121.775	80.25	91.905	-1.23804	2.3527e-09	2.33146e-08	-0.603632	0.0264493	0.132358	-0.0505302	0.590804	0.877167	-0.066449	0.724389	0.971522	-0.199326	0.330268	0.767359	0.364219	0.12771	0.538425	0.469216	0.00753952	0.029343	0.306839	0.0743042	0.172824	-0.210266	0.196977	0.398735
Zm00001eb011680	1.095	2.84	1.385	1.91	2.48	1.12	0.001	0.001	0.001	0.001	0.001	0.001	0.802642	0.500604	0.633557	-0.195551	1	1	-0.306387	1	1	0	1	1	0	1	1	0	1	1	-10.8994	0.00531418	0.0217819	-11.2761	0.000527804	0.00252135	-10.1293	0.0730593	0.194558
Zm00001eb011700	10.71	16.71	10.705	14.625	12.28	10.88	9.695	6.56	11.82	6.46	8.105	11.575	0.449478	0.177505	0.283016	-0.444401	0.29068	0.643684	0.0233938	0.563277	0.857166	-0.585707	0.343541	0.716411	0.305116	0.545936	0.930817	-0.0302178	1	1	-1.17883	0.00501362	0.0207353	-0.599426	0.124624	0.259025	0.0893336	0.939314	1
Zm00001eb011730	15.98	34.06	39.27	39.44	33.735	40.67	21.935	26.735	18.48	18.27	22.13	22.905	1.30339	1.55651e-07	1.15919e-06	-0.0138323	0.790078	0.992845	0.0505374	0.38902	0.723233	-0.263758	0.686185	0.95447	-0.272726	0.32124	0.757383	0.309698	0.291732	0.784787	-1.11018	9.039e-05	0.000623155	-0.608243	0.0154545	0.0477726	-0.828302	0.00191052	0.0102881
Zm00001eb011810	32.725	33.805	34.385	24.78	25.885	30.495	79.78	87.725	68.165	72.81	103.165	53.52	-0.401217	0.0623036	0.120356	-0.38512	0.3016	0.656379	-0.173207	0.968972	1	-0.131891	1	1	0.233894	0.455454	0.875961	-0.348953	0.123678	0.530394	1.55496	2.54745e-10	4.54394e-09	1.99477	6.09677e-20	2.19197e-18	0.811505	0.0192435	0.0688842
Zm00001eb011820	7.28	0.001	0.485	1.845	0.001	0.72	8.4	0.51	0.725	5.78	0.435	1.495	-1.98032	0.000393359	0.00146938	0	1	1	0.570012	1	1	-0.53932	0.355321	0.729111	-0.229482	1	1	1.04409	0.510384	0.945422	1.64745	0.00239143	0.0110324	8.76487	0.50269	0.69435	1.05408	0.530778	0.754029
Zm00001eb011830	22.91	11.365	10.865	9.855	12.255	12.075	4.58	4.57	5.145	5.155	4.735	4.875	-1.21705	7.94021e-06	4.29132e-05	0.108773	0.620226	0.909957	0.152335	0.354257	0.692322	0.170625	0.586111	0.901968	0.0511703	1	1	-0.0777689	1	1	-0.934883	0.0384059	0.111823	-1.37193	0.000307251	0.0015563	-1.30855	0.00141577	0.00803517
Zm00001eb011840	124.68	43.205	35.15	35.335	31.175	22.3	51.9	44.875	42.025	46.185	36.61	30.72	-1.81906	7.35763e-17	2.03227e-15	-0.470809	0.152281	0.443947	-0.656481	0.102321	0.343618	-0.16831	0.905371	1	-0.293674	0.203471	0.611963	-0.45207	0.05448	0.329521	0.386326	0.036896	0.108406	0.231848	0.210778	0.383982	0.462135	0.347745	0.585137
Zm00001eb011850	13.495	29.3	25.275	35.91	26.12	18.775	0.001	0.001	0.001	0.001	0.575	0.001	1.41196	4.23937e-08	3.47443e-07	-0.165746	0.83698	1	-0.428898	0.431762	0.762817	0	1	1	9.16742	0.500038	0.902459	0	1	1	-15.1321	1.04509e-34	1.08354e-32	-5.50545	2.54143e-26	1.45143e-24	-14.1965	1.88362e-17	1.02742e-15
Zm00001eb011860	3.16	11.46	6.41	9.995	9.925	5.935	1.345	1.495	1.635	1.115	1.42	1.425	1.66128	2.27674e-05	0.00011242	-0.207468	0.862077	1	-0.111076	1	1	-0.270562	1	1	-0.0742546	1	1	-0.198329	1	1	-3.16416	3.61778e-08	4.79544e-07	-2.80518	6.22023e-08	6.52089e-07	-2.05829	0.00217258	0.0114651
Zm00001eb011870	4.76	15.475	12.635	18.365	12.77	9.815	0.001	0.001	0.001	0.001	0.21	0.001	1.94793	1.03794e-08	9.34933e-08	-0.277181	0.674457	0.937293	-0.364365	0.817952	0.997939	0	1	1	7.71425	1	1	0	1	1	-14.1647	1.12486e-22	5.81991e-21	-5.92623	9.75265e-16	2.50455e-14	-13.2608	6.41473e-09	1.18905e-07
Zm00001eb011880	30.65	43.135	10.54	25.315	110.83	18.555	27.625	59.935	29.51	32.62	151.545	39.45	-0.275895	0.232337	0.351033	1.36142	8.55565e-10	3.61604e-08	0.815933	0.00255947	0.0246521	0.239782	0.129805	0.417502	1.33828	3.70151e-08	1.84552e-06	0.418821	0.0892214	0.442003	0.365764	0.0825233	0.203674	0.451398	0.0101559	0.0333446	1.08822	0.00224389	0.0117876
Zm00001eb011900	13.13	19.905	5.05	10.415	44.795	8.445	11.485	27.2	16.6	12.89	76.91	17.91	-0.334204	0.213352	0.328601	1.17021	1.15403e-06	2.535e-05	0.741814	0.0272321	0.144239	0.166501	0.415233	0.784854	1.49956	6.98207e-09	3.95792e-07	0.109582	0.777378	1	0.307589	0.240324	0.447542	0.779833	7.25127e-05	0.000425373	1.0846	0.0169697	0.0622691
Zm00001eb011920	19.785	21.935	22.145	16.62	16.78	9.695	11.215	7.015	15	8.895	9.34	11.105	-0.251487	0.290706	0.417218	-0.386492	0.307672	0.662605	-1.19167	0.00252865	0.0244276	-0.334363	0.644702	0.932201	0.412979	0.385644	0.819755	-0.433753	0.31525	0.806157	-0.901854	0.0125208	0.0450461	-0.845248	0.00852252	0.0286992	0.195897	1	1
Zm00001eb011930	1.32	0.745	0.815	1.355	3.845	1.63	8.585	2.625	0.001	1.56	20.685	0.265	0.0377549	1	1	2.36767	0.00223226	0.0188876	1	0.344004	0.681974	-2.46027	0.0112709	0.0782249	2.9782	1.22114e-10	9.91974e-09	8.04985	1	1	0.203253	1	1	2.42753	9.31893e-12	1.5838e-10	-2.62081	0.0855779	0.217933
Zm00001eb011950	17.185	12.765	13.885	34.48	24.4	15.4	11.74	6.89	14.535	25.315	16.825	20.185	1.00461	6.19183e-05	0.000278963	0.934688	0.00041723	0.00463088	0.149403	0.360256	0.69718	1.10856	0.000606982	0.00742931	1.28803	0.000850704	0.0117806	0.473753	0.110901	0.498767	-0.445767	0.26963	0.483886	-0.536275	0.0549175	0.136037	0.390353	0.534982	0.757333
Zm00001eb011990	40.26	21.425	15.045	17.74	25.73	16.545	13.04	19.12	17.605	17.315	25.71	19.395	-1.18234	2.7879e-07	1.98697e-06	0.264156	0.193116	0.512768	0.137111	0.295862	0.629913	0.409079	0.0992416	0.354425	0.427247	0.150177	0.51758	0.1397	0.676096	1	-0.0349836	0.907154	0.992655	-0.00112185	0.844958	0.949696	0.229289	0.855043	0.976603
Zm00001eb012000	51.67	141.82	182.585	149.105	129.225	160.34	134.96	161.635	141.37	158.775	116.785	133.625	1.52893	1.38451e-12	2.22823e-11	-0.134176	0.852304	1	-0.187434	0.980577	1	0.234452	0.0745906	0.297177	-0.468885	0.0345698	0.206446	-0.0812861	0.690972	1	0.0906551	0.385159	0.610918	-0.14603	0.648701	0.813877	-0.262944	0.122596	0.28423
Zm00001eb012030	3.255	7.32	8.53	7.045	6.935	4.995	0.001	0.001	0.001	0.001	0.001	0.001	1.11394	0.0140418	0.0341138	-0.0779478	1	1	-0.772061	0.192259	0.499498	0	1	1	0	1	1	0	1	1	-12.7824	9.38439e-10	1.53907e-08	-12.7597	8.53232e-10	1.1467e-08	-12.2863	5.30707e-06	5.79424e-05
Zm00001eb012040	2.81	2.87	5.535	103.645	45.84	34.59	3.415	3.26	6.13	118.675	48.655	28.37	5.20494	5.59356e-52	3.05141e-49	3.99748	5.9071e-30	2.97195e-27	2.6437	5.5916e-09	4.06032e-07	5.11899	6.0784e-53	1.97993e-49	3.89964	3.78219e-21	1.5173e-18	2.21041	1.30015e-07	8.56447e-06	0.195366	0.237702	0.443859	0.085981	0.561806	0.74608	-0.285989	0.304367	0.535327
Zm00001eb012060	97.105	24.63	29.75	21.2	22.19	18.33	23.59	21.33	18.885	22.135	28.91	25.025	-2.19548	1.7691e-21	8.07035e-20	-0.150507	0.834714	1	-0.698683	0.0874958	0.311031	-0.091846	0.870483	1	0.438685	0.122034	0.465433	0.406129	0.139	0.561844	0.0622651	0.578521	0.780328	0.381659	0.0667316	0.158458	0.449163	0.36939	0.60784
Zm00001eb012070	1.415	1.805	1.15	5.085	5.84	1.56	0.675	0.001	0.485	3.425	8.275	5.005	1.84545	0.00285982	0.0085729	1.69397	0.00213921	0.01823	0.439912	0.549061	0.846985	2.34314	0.0044522	0.0381817	13.0145	7.27284e-09	4.1049e-07	3.36731	0.00016582	0.00403346	-0.570144	0.44022	0.664394	0.502791	0.197256	0.365793	1.68182	0.0478342	0.140226
Zm00001eb012080	2.635	3.155	10.18	14.125	15.115	26.55	19.795	10.575	11.72	24.215	12.615	21.03	2.42238	2.07186e-08	1.7893e-07	2.26027	5.5709e-08	1.67332e-06	1.38297	3.00565e-06	9.17075e-05	0.290765	0.109979	0.378315	0.254483	0.509447	0.90302	0.843476	0.0109451	0.110489	0.77765	0.00143563	0.00706252	-0.260841	0.521872	0.711143	-0.336263	0.118751	0.277427
Zm00001eb012100	149.25	79.315	108.795	68.595	62.7	81.03	68.89	73.455	84.66	58.725	65.85	87.355	-1.12156	7.83626e-08	6.14349e-07	-0.339128	0.290768	0.643684	-0.425084	0.360462	0.697273	-0.23032	0.695109	0.957082	-0.157677	0.4412	0.871737	0.0452098	0.850274	1	-0.224129	0.580841	0.782006	0.070718	0.538959	0.725587	0.108434	0.874918	0.987431
Zm00001eb012140	30.15	16.775	18.73	14.115	9.98	10.79	16.54	7.23	17.545	8.59	11.255	18.01	-1.09493	7.54878e-06	4.09583e-05	-0.749201	0.0423987	0.18695	-0.795656	0.0856743	0.306227	-0.945229	0.0213289	0.125244	0.638499	0.139828	0.49811	0.0377382	0.944601	1	-0.716499	0.0777684	0.194314	0.173454	0.495716	0.688359	0.739103	0.132132	0.30071
Zm00001eb012160	5.79	11.665	15.105	19.975	28.675	17.27	6.5	10.55	6.725	10.71	32.09	11.74	1.78656	2.23241e-08	1.91721e-07	1.29761	1.16557e-06	2.55391e-05	0.193242	0.276356	0.607225	0.720447	0.0697878	0.284952	1.60488	1.41059e-07	6.21328e-06	0.803826	0.0424006	0.27874	-0.899237	0.0206006	0.0677291	0.16233	0.34565	0.541415	-0.556836	0.0708205	0.19061
Zm00001eb012220	69.165	34.525	43.775	25.355	25.105	24.42	38.205	25.27	45.535	21.005	26.93	44.655	-1.44777	6.33516e-11	7.94474e-10	-0.459667	0.157601	0.453544	-0.842044	0.0149069	0.0930418	-0.863029	0.00673872	0.0530141	0.0917886	0.820969	1	-0.0281542	0.916534	1	-0.271537	0.492994	0.71297	0.10124	0.498768	0.691235	0.870759	0.0185165	0.0668303
Zm00001eb012270	604.67	526.28	488.8	724.445	738.805	374.465	261.005	194.925	312.695	727.95	545.995	307.15	0.260728	0.309709	0.438151	0.489363	0.0142684	0.083305	-0.384413	0.472459	0.798515	1.47976	2.88734e-13	2.57826e-11	1.48597	3.26444e-10	2.41828e-08	-0.0258128	0.894766	1	0.0069632	0.662646	0.84309	-0.436306	0.0619491	0.149703	-0.285887	0.0887569	0.223534
Zm00001eb012310	55.845	44.725	65.975	80.005	84.35	132.7	48.325	60.27	62.19	83.38	61.005	64.965	0.518662	0.0256852	0.0570021	0.915307	8.50841e-05	0.00118631	1.00818	1.11224e-05	0.00027936	0.786932	7.9937e-05	0.001313	0.0174874	1	1	0.0629801	0.802992	1	0.0596112	0.504838	0.723052	-0.467461	0.0657432	0.156619	-1.03043	1.76598e-05	0.000174164
Zm00001eb012320	2.485	3.65	5.15	5.805	5.11	3.525	0.56	0.001	0.78	0.475	0.68	0.775	1.22405	0.0158517	0.0378029	0.485427	0.29803	0.652364	-0.546949	0.61712	0.895037	-0.237499	1	1	9.40939	0.250056	0.673115	-0.00927781	1	1	-3.6113	1.38872e-05	0.000116193	-2.90972	0.00014054	0.000777922	-2.18536	0.0172714	0.0631931
Zm00001eb012350	5.195	6.505	5.34	2.435	1.915	1.89	7.005	8.015	10.245	2.15	2.175	2.23	-1.0932	0.0217615	0.0495069	-1.7642	0.00299646	0.0241508	-1.49845	0.0359615	0.174056	-1.70405	0.00365957	0.0327008	-1.88169	0.000200915	0.00353752	-2.1998	2.51607e-05	0.000826608	-0.179585	1	1	0.183671	0.826862	0.939607	0.238657	1	1
Zm00001eb012360	9.745	10.14	11.045	5.33	5.935	4.91	17.99	15.425	13.03	6.285	6.87	10.03	-0.870527	0.0314068	0.0676974	-0.772738	0.123169	0.38913	-1.1696	0.0346763	0.170277	-1.51721	0.000399236	0.00517413	-1.16689	0.000594416	0.00882933	-0.377515	0.435329	0.909557	0.237777	0.591955	0.790807	0.211062	0.565771	0.749305	1.03053	0.136731	0.308485
Zm00001eb012410	141.81	90.805	84.195	57.635	70.875	61.24	48.54	35.415	54.805	35.47	55.16	66.775	-1.29894	1.30513e-10	1.56838e-09	-0.357495	0.238754	0.580979	-0.45926	0.308524	0.641836	-0.452575	0.208076	0.554025	0.639262	0.0122569	0.0976824	0.285001	0.213713	0.691954	-0.700346	0.00851771	0.0325859	-0.361654	0.145655	0.291516	0.124834	0.919604	1
Zm00001eb012420	4.365	3.58	3.02	1.06	2.55	1.68	0.355	0.001	1.01	1.51	0.001	1.14	-2.04192	0.00116045	0.00386958	-0.489462	0.784679	0.99016	-0.846087	0.482317	0.805287	2.08866	0.270313	0.631931	0	1	1	0.174679	1	1	0.510484	0.668651	0.847104	-11.3163	0.000274211	0.00140974	-0.559427	0.576266	0.791645
Zm00001eb012440	7.53	10.185	13.565	17.7	14.47	15.475	11.665	7.04	9.055	12.81	8.35	11.08	1.23303	0.000122541	0.000518961	0.506619	0.120212	0.3833	0.19005	0.310133	0.643792	0.135084	0.457274	0.816427	0.246201	0.665929	0.996943	0.291171	0.424334	0.902508	-0.466479	0.211806	0.408861	-0.793217	0.0486011	0.123007	-0.481982	0.13882	0.311128
Zm00001eb012470	38.13	301.99	103.095	366.6	755.66	336.97	52.42	245.55	116.735	331.395	393.115	361.435	3.26521	9.71015e-40	2.15475e-37	1.32324	3.4637e-11	1.82696e-09	1.70865	1.40666e-06	4.74287e-05	2.66036	1.38634e-17	2.10667e-15	0.678935	0.00296033	0.0323934	1.6305	7.09611e-12	1.10283e-09	-0.145655	0.844079	0.957883	-0.942786	8.12852e-07	7.06662e-06	0.101116	0.892465	0.99688
Zm00001eb012480	48.805	31.4	46.505	20.735	19.63	29.595	69.52	39.505	62.945	38.495	32.315	47.395	-1.23496	5.10143e-08	4.12541e-07	-0.677704	0.0221193	0.116225	-0.652032	0.0833629	0.30039	-0.852757	0.00146996	0.0154444	-0.289831	0.19938	0.604961	-0.409357	0.0594064	0.346335	0.892603	5.23069e-05	0.00038197	0.719144	0.00100226	0.00448323	0.679381	0.0708681	0.190697
Zm00001eb012530	1.565	4.215	2.785	2.55	2.52	3.055	4.38	5.57	7.55	4.49	6.65	5.295	0.704335	0.332059	0.462709	-0.742109	0.306845	0.662022	0.133495	0.678005	0.930853	0.0357846	0.878714	1	0.255677	0.687555	1	-0.511846	0.299029	0.791564	0.816218	0.110782	0.254427	1.39993	0.00400428	0.015009	0.793458	0.351196	0.589193
Zm00001eb012570	1524.57	524.06	1179.84	381.655	410.885	607.835	159.58	180.465	147.28	131.775	92.05	114.595	-1.99806	1.61531e-07	1.19957e-06	-0.350997	0.264146	0.611503	-0.956833	0.0133694	0.0857935	-0.276203	0.709391	0.964247	-0.971229	5.47964e-05	0.00116929	-0.362017	0.362568	0.851976	-1.53419	4.17698e-09	6.339e-08	-2.15825	2.69911e-21	1.08879e-19	-2.40714	1.96687e-10	4.60053e-09
Zm00001eb012590	3.95	11.685	15.875	31.005	25.065	19.63	12.32	13.53	16.965	37.63	25.155	25.46	2.97258	2.39564e-21	1.07969e-19	1.10102	4.32504e-05	0.000658624	0.306304	0.0971784	0.332357	1.61088	1.13229e-10	6.45234e-09	0.894683	0.0032661	0.0351357	0.585671	0.035925	0.251388	0.279382	0.107302	0.248525	0.00517096	0.80151	0.923176	0.375172	0.495559	0.727928
Zm00001eb012610	114.135	46.14	47.85	46.03	38.76	40.965	59.36	55.535	57.49	54.425	49.315	50.005	-1.31009	3.32456e-08	2.76273e-07	-0.251449	0.4896	0.827326	-0.224127	0.947542	1	-0.125222	0.979419	1	-0.171371	0.414769	0.847611	-0.201239	0.372221	0.860787	0.241695	0.140446	0.303128	0.347458	0.0517855	0.129742	0.287681	0.643531	0.83997
Zm00001eb012660	36.575	26.215	23.17	15.1	12.865	16.585	20.04	18.11	24.255	11.84	15.325	22.835	-1.27631	1.06685e-07	8.1874e-07	-1.02694	0.00103968	0.0100185	-0.482379	0.372013	0.709527	-0.759213	0.0618007	0.263737	-0.240899	0.411816	0.844156	-0.0870354	0.815654	1	-0.350879	0.458947	0.683212	0.252436	0.321192	0.515095	0.461368	0.393295	0.632361
Zm00001eb012690	17	6.15	6.825	3.98	3.495	2.22	8.535	4.79	8.195	3.745	6.195	7.27	-2.09469	1.55526e-09	1.5877e-08	-0.815294	0.156753	0.451898	-1.62027	0.00937583	0.065998	-1.18843	0.0190456	0.115298	0.371079	0.558374	0.937853	-0.172789	0.727389	1	-0.0878027	1	1	0.825812	0.0620999	0.150003	1.7114	0.0176621	0.064322
Zm00001eb012700	16.375	8.72	8.585	3.38	5.47	7.74	20.675	19.935	31.53	8.165	6.125	11.07	-2.2764	4.05832e-10	4.55691e-09	-0.672787	0.187017	0.50322	-0.149485	1	1	-1.34036	0.000486852	0.00614716	-1.70252	2.65486e-05	0.000625366	-1.51007	2.03574e-07	1.26401e-05	1.27243	0.00248901	0.0113946	0.163169	0.630813	0.801192	0.51625	0.42879	0.666951
Zm00001eb012710	34.035	15	12.815	13.89	10.81	11.77	30.335	27.155	37.31	23.88	20.53	26.105	-1.29297	3.85646e-07	2.66935e-06	-0.472596	0.29056	0.643662	-0.122719	0.858432	1	-0.34518	0.440483	0.805777	-0.403484	0.112703	0.442196	-0.515236	0.0368335	0.255609	0.781756	0.00137252	0.00680133	0.925367	0.000390943	0.00192737	1.14921	0.00307583	0.015325
Zm00001eb012720	9.365	3.515	2.65	3.39	3.45	0.92	2.985	2.145	2.98	1.055	1.355	1.4	-1.46599	0.000282121	0.00109297	-0.0269283	1	1	-1.52629	0.179881	0.480029	-1.50049	0.0964796	0.348585	-0.662685	0.581243	0.952373	-1.08989	0.245812	0.734015	-1.68404	0.0443661	0.125317	-1.3483	0.0678582	0.160606	0.605721	1	1
Zm00001eb012750	22.06	17.245	34.895	3.1	8.57	12.775	17.315	32.035	38.245	8.325	10.975	19.96	-2.83109	6.37415e-12	9.22139e-11	-1.00881	0.0059118	0.0416661	-1.4497	1.65066e-05	0.000392593	-1.0565	0.0134394	0.089613	-1.54543	6.57434e-08	3.13979e-06	-0.938159	0.000173792	0.00419201	1.42518	0.00494707	0.0205162	0.356854	0.214476	0.388605	0.643788	0.167613	0.355898
Zm00001eb012780	3.135	5.045	4.125	16.805	14.155	5.335	6.285	4.595	4.135	17.695	20.6	13.595	2.42235	2.83936e-08	2.39294e-07	1.48839	6.56816e-05	0.000948324	0.371094	0.33333	0.670788	1.49336	3.54289e-06	8.21981e-05	2.16451	4.98505e-08	2.42384e-06	1.71712	4.62397e-05	0.0013905	0.0744512	0.642711	0.829444	0.541333	0.0222867	0.0649069	1.34952	0.00689218	0.0298836
Zm00001eb012880	7.835	17.56	13.925	18.51	75.535	41.675	18.92	17.58	21.455	24.115	62.42	54.225	1.2403	0.000351201	0.00132797	2.10485	7.67984e-15	6.69233e-13	1.5815	1.64386e-06	5.43685e-05	0.350019	0.252979	0.61213	1.82807	3.42294e-11	3.02824e-09	1.33764	7.74928e-05	0.00213282	0.381626	0.203993	0.397719	-0.275137	0.300448	0.491991	0.379776	0.574676	0.790329
Zm00001eb012890	65.295	119.645	135.62	133.055	130.07	151.825	140.04	181.355	173.52	155.61	162.675	176.75	1.02698	9.25324e-07	5.94154e-06	0.120528	0.343787	0.700861	0.162839	0.161633	0.451952	0.152096	0.157586	0.468736	-0.156824	0.422351	0.855775	0.0266083	0.911124	1	0.225912	0.122999	0.27546	0.322704	0.0399826	0.105345	0.219301	0.814791	0.952988
Zm00001eb012900	45.665	14.425	15.695	15.365	15.605	13.665	12.42	11.775	13.08	8.64	8.36	9.905	-1.57144	4.96661e-11	6.34393e-10	0.113437	0.587546	0.89038	-0.19982	1	1	-0.523562	0.269819	0.63136	-0.494152	0.167387	0.550069	-0.401134	0.256224	0.745102	-0.830545	0.0289295	0.0892439	-0.900434	0.0108972	0.0354181	-0.464257	0.115015	0.270806
Zm00001eb012920	36.955	48.235	21.085	260.84	107.615	51.185	51.36	89.95	29.605	127.795	54.035	40.03	2.81932	4.38464e-32	5.21872e-30	1.15773	2.03385e-05	0.000335918	1.2795	6.49615e-08	3.31125e-06	1.31511	1.34261e-07	4.33389e-06	-0.735229	0.00232028	0.0266654	0.435241	0.0933236	0.453411	-1.02933	0.000339646	0.00200512	-0.993913	4.73998e-06	3.60785e-05	-0.354639	0.0812972	0.209972
Zm00001eb012930	277.435	112.34	58.59	72.71	125.895	173.535	1.12	0.53	0.655	0.755	4.69	4.255	-1.93192	0.00571922	0.0156765	0.164349	0.553113	0.868435	1.5665	4.56328e-08	2.45097e-06	-0.56895	1	1	3.14552	0.00132149	0.0169166	2.69959	0.00542587	0.0651356	-6.58953	1.51835e-46	3.38452e-44	-4.74649	1.34878e-58	5.23582e-56	-5.34992	2.71049e-36	8.38927e-34
Zm00001eb012940	15.415	31.45	16.035	6.02	7.46	3.55	4.32	8.965	9.335	1.055	2.315	1.035	-1.3565	1.93048e-05	9.68014e-05	-2.07581	3.10126e-11	1.64574e-09	-2.17533	1.32339e-05	0.000325967	-2.03379	0.0107997	0.0757849	-1.95329	0.000170644	0.00309481	-3.17302	0.000192286	0.00456179	-2.51252	0.00031666	0.00188991	-1.68816	0.00217791	0.00881332	-1.77819	0.0321903	0.103533
Zm00001eb013070	32.59	8.815	3.65	4.74	6.7	4.7	0.88	3.585	1.685	4.41	0.825	1.72	-2.78147	2.42789e-17	7.02478e-16	-0.395799	0.473684	0.814654	0.364764	0.344884	0.68325	2.3252	0.00944461	0.0684569	-2.11951	0.0213458	0.146603	0.02966	1	1	-0.104108	1	1	-3.0217	9.32705e-06	6.64605e-05	-1.45025	0.0554019	0.157636
Zm00001eb013130	15.02	24.595	5.895	5.225	4.675	0.89	3.655	1.485	4.91	1.695	1.88	0.95	-1.52338	2.54734e-05	0.000124514	-2.39533	3.28789e-06	6.57629e-05	-2.72761	0.000542175	0.00720572	-1.10859	0.224533	0.577427	0.34027	1	1	-2.36972	0.00240514	0.0349709	-1.62415	0.0295481	0.0907547	-1.31423	0.0400695	0.105542	0.0941222	1	1
Zm00001eb013150	8.165	6.825	6.11	10.96	12.68	10.39	14.62	18.525	21.975	21.525	25.44	26.045	0.424723	0.2524	0.374921	0.893654	0.0118022	0.0716068	0.765951	0.015687	0.0961616	0.55807	0.0729887	0.292868	0.457625	0.138782	0.496144	0.245143	0.395449	0.875343	0.973765	0.00401417	0.0172186	1.00454	6.61161e-05	0.000392578	1.32581	0.000808842	0.0049872
Zm00001eb013160	1.59	3.195	7.01	4.515	6.75	2.82	5.95	2.815	3.95	7.615	5.225	7.64	1.5057	0.0063162	0.0170928	1.07907	0.0206118	0.109848	-1.31372	0.0676165	0.262556	0.355954	0.253833	0.613055	0.892296	0.171781	0.558595	0.95172	0.0739703	0.395797	0.754118	0.0734215	0.186174	-0.369456	0.558715	0.743168	1.43788	0.0386178	0.119527
Zm00001eb013180	2.65	5.255	2.92	6.23	6.485	0.8	6.385	5.37	6.45	11.23	6.8	5.685	1.23324	0.0166931	0.0394753	0.303416	0.502123	0.834965	-1.8679	0.0575498	0.239179	0.814599	0.0578441	0.251048	0.340613	0.619164	0.973151	-0.182139	0.807294	1	0.850054	0.0681226	0.175928	0.0684282	0.828483	0.940452	2.82909	0.00284467	0.0144392
Zm00001eb013190	33.21	16.64	20.075	18.575	20.56	18.84	92.92	86.605	90.325	98.815	107.115	91.33	-0.838256	0.000358942	0.00135489	0.305185	0.180619	0.493612	-0.091601	0.7941	0.987535	0.0887409	0.3191	0.690466	0.306638	0.231347	0.653163	0.0159635	0.956621	1	2.41137	3.43324e-24	2.0591e-22	2.38125	1.10263e-27	6.72758e-26	2.27729	4.84919e-13	1.61749e-11
Zm00001eb013220	24.99	39.78	30.725	46.07	41.95	34.15	33.865	42.15	39.475	80.52	55.555	41.995	0.882477	7.92853e-05	0.000349922	0.0766275	0.565754	0.876539	0.152473	0.206489	0.521054	1.24955	3.18365e-09	1.41414e-07	0.398384	0.117196	0.453277	0.0892783	0.74786	1	0.80552	6.00556e-05	0.000432999	0.405246	0.0297354	0.0825092	0.298332	0.636023	0.835228
Zm00001eb013280	9.515	12.195	10.255	14.32	13.33	11.355	5.265	3.96	4.43	4.355	4.72	5.005	0.589756	0.0620717	0.119972	0.128387	0.59024	0.891108	0.147	0.426899	0.758555	-0.273761	0.883537	1	0.253286	0.738919	1	0.176063	0.879608	1	-1.71729	2.33127e-05	0.000185042	-1.49782	6.76599e-05	0.000400148	-1.18189	0.0080225	0.0338105
Zm00001eb013290	3.03	2.53	2.545	3.69	4.685	2.345	2.15	2.615	2.59	1.96	1.03	2.405	0.284303	0.783023	0.872674	0.888912	0.0995196	0.338545	-0.118078	1	1	-0.133483	1	1	-1.34417	0.179795	0.570484	-0.106915	1	1	-0.912767	0.222073	0.423636	-2.1854	0.00132395	0.00570406	0.036449	1	1
Zm00001eb013320	0.001	3.77	3.56	2.435	3.795	1.92	0.001	0.001	0.001	0.001	0.001	0.001	11.2497	0.00016659	0.000684259	0.00953536	1	1	-0.890771	0.398968	0.733387	0	1	1	0	1	1	0	1	1	-11.2497	0.000620635	0.00344141	-11.8899	4.86545e-05	0.000298422	-10.9069	0.0174526	0.0637422
Zm00001eb013330	0.001	3.75	4.34	2.4	3.32	2.815	0.001	0.001	0.001	0.001	0.001	0.001	11.2288	0.000266266	0.00103923	-0.175707	1	1	-0.62456	0.576518	0.867916	0	1	1	0	1	1	0	1	1	-11.2288	0.0009508	0.00498392	-11.697	8.05627e-05	0.000468593	-11.4589	0.00162391	0.008994
Zm00001eb013340	18.155	11.095	22.695	58.74	25.4	44.435	22.875	20.315	26.975	101.63	24.255	49.42	1.69398	3.27682e-13	5.67483e-12	1.19492	1.20526e-05	0.000211482	0.969322	4.2113e-05	0.00086543	2.15148	8.5339e-16	1.03141e-13	0.255737	0.419622	0.852517	0.873472	0.000270172	0.00609214	0.790911	0.000277968	0.00168985	-0.0665463	1	1	0.153399	1	1
Zm00001eb013360	31.93	37.275	85.84	110.295	86.135	93.645	95.06	131.295	109.135	90.98	50.675	49.95	1.78838	7.1605e-16	1.72174e-14	1.20839	1.51121e-06	3.23536e-05	0.125552	0.231529	0.553389	-0.063289	0.730747	0.973148	-1.37347	3.93078e-07	1.53212e-05	-1.12756	1.16755e-06	5.86124e-05	-0.277746	0.407048	0.632003	-0.765325	0.00852909	0.0287144	-0.906717	0.000173902	0.00131616
Zm00001eb013370	5.3	3.2	2.76	1.23	0.27	0.615	1.435	0.965	0.001	0.001	0.001	0.001	-2.10733	0.000208367	0.00083452	-3.56704	0.00119694	0.0112364	-2.16601	0.0641896	0.25441	-10.4868	0.0339889	0.174373	-9.91439	0.255712	0.678114	0	1	1	-10.2644	0.0351698	0.104459	-8.07682	1	1	-9.26444	0.265143	0.48838
Zm00001eb013430	294.675	181.85	360.96	1617.1	1320.62	3119.81	434.78	422.48	283.605	1904.25	1156.69	1522.7	2.45621	3.48503e-11	4.55595e-10	2.86039	1.55068e-34	1.12692e-31	3.11155	1.40868e-22	2.2104e-19	2.13087	6.43284e-18	9.94984e-16	1.45305	9.80175e-10	6.63871e-08	2.42468	9.92219e-13	1.82639e-10	0.235814	0.203062	0.396244	-0.191207	0.45353	0.649337	-1.03483	0.000244738	0.00176495
Zm00001eb013440	4.665	7.885	4.96	9.93	7.87	3.09	10.345	5.15	7.73	8.12	6.805	2.865	1.08992	0.00401641	0.0115698	-0.00274712	0.916834	1	-0.682733	0.385739	0.721542	-0.349382	0.722541	0.970756	0.402023	0.492323	0.902459	-1.43193	0.0184074	0.159071	-0.290314	0.730686	0.891495	-0.209768	0.754966	0.893109	-0.109072	0.860861	0.979956
Zm00001eb013450	12.935	5.645	6.105	28.33	13.805	9.845	9.415	8.215	6.89	41.86	24.655	17.115	1.13105	2.90504e-05	0.000140633	1.29015	0.000479915	0.00522712	0.6894	0.0345236	0.169752	2.15254	1.03765e-15	1.24255e-13	1.58555	8.11815e-05	0.00162842	1.31269	0.00098711	0.0176321	0.563242	0.00635267	0.0253585	0.836689	0.00481972	0.017577	0.797798	0.11803	0.276171
Zm00001eb013490	143.92	40.26	32.695	25.705	26.68	22.16	23.505	22	24.86	21.41	17.195	25.63	-2.48515	2.80413e-29	2.5407e-27	-0.593589	0.0420538	0.186035	-0.561112	0.192	0.499243	-0.134683	1	1	-0.355514	0.222229	0.640456	0.0440072	0.913715	1	-0.263764	0.516575	0.732188	-0.63377	0.0203258	0.0600383	0.209876	0.884575	0.992732
Zm00001eb013530	0.685	2.62	2.69	2.945	3.575	3.045	0.001	0.001	0.001	0.001	0.001	0.001	2.10409	0.0135181	0.0330291	0.448376	0.472164	0.813906	0.178836	0.678005	0.930853	0	1	1	0	1	1	0	1	1	-11.5241	0.000312808	0.00187062	-11.8037	8.14089e-06	5.89494e-05	-11.5722	0.000462283	0.00308424
Zm00001eb013540	9.11	5.2	9.905	6.005	9.86	10.31	3.99	3.985	2.035	3.16	4.725	4.75	-0.601287	0.0889778	0.162248	0.923076	0.0199061	0.107113	0.0578155	0.551655	0.849123	-0.336464	0.861555	1	0.245735	0.865992	1	1.2229	0.0549185	0.331247	-0.92624	0.0970856	0.229826	-1.06127	0.0152296	0.0471644	-1.11804	0.00663367	0.028923
Zm00001eb013570	4.455	4.99	5.335	2.995	3.99	3.965	0.96	0.4	0.77	1.1	0.24	1.145	-0.572869	0.246008	0.367603	-0.322651	0.796463	0.995132	-0.428167	0.767254	0.976526	0.196397	1	1	-0.736966	1	1	0.572417	0.738406	1	-1.44505	0.100807	0.236739	-4.05528	0.000144549	0.000797476	-1.79197	0.0128791	0.0498277
Zm00001eb013610	8.52	9.47	3.59	3.955	5.375	0.71	7.545	6.895	6.645	3.15	9.01	6.64	-1.10718	0.00458118	0.0129755	-0.8171	0.125914	0.39451	-2.33809	0.0213741	0.12124	-1.26017	0.0445856	0.209277	0.385977	0.47995	0.894395	-0.00108596	1	1	-0.328326	0.762231	0.912174	0.745262	0.0530982	0.132387	3.22529	0.000182308	0.00137003
Zm00001eb013620	4.805	8.675	6.1	7.935	7.375	3.965	1.475	0.745	1.845	1.21	1.345	1.095	0.723694	0.0762659	0.142453	-0.234221	0.760092	0.980783	-0.621488	0.443112	0.773885	-0.285708	1	1	0.852294	0.726645	1	-0.75269	0.551663	0.967274	-2.71322	1.0574e-05	9.0742e-05	-2.45504	1.30791e-05	9.02197e-05	-1.85639	0.0140144	0.0533138
Zm00001eb013650	4.58	7.405	4.965	5.34	5.715	2.055	8.9	5.745	9.095	9.63	8.725	9.94	0.221492	0.723791	0.82614	-0.373746	0.565288	0.87613	-1.27266	0.122597	0.38315	0.11373	0.595059	0.907465	0.602848	0.264364	0.690529	0.128172	0.838305	1	0.850696	0.0234184	0.0752003	0.610402	0.0885778	0.198391	2.27411	0.000254253	0.00182221
Zm00001eb013680	0.44	0.001	0.375	3.26	2.09	1.33	0.315	0.001	0.001	4.335	1.53	0.775	2.8893	0.000454877	0.00167383	11.0293	0.00210188	0.0179939	1.82646	0.125136	0.385348	3.78261	0.000104059	0.00165685	10.5793	0.0312852	0.19159	9.59805	0.252847	0.741114	0.41116	0.428371	0.652944	-0.449971	0.817044	0.933672	-0.779158	0.535953	0.758252
Zm00001eb013690	40.54	14.54	12.345	7.36	10.02	7.405	10.63	6.11	13.645	5.3	8.115	11.325	-2.46157	1.89914e-19	6.99424e-18	-0.537145	0.184737	0.500355	-0.737355	0.190566	0.496937	-1.00408	0.0406414	0.196205	0.409419	0.458526	0.878393	-0.268861	0.427821	0.904871	-0.473713	0.442368	0.666343	-0.30422	0.584396	0.764542	0.612939	0.307336	0.538508
Zm00001eb013720	1.96	5.77	5.1	3.675	3.64	2.555	2.045	2.73	3.835	0.605	3.06	2.88	0.906891	0.143612	0.239033	-0.664633	0.32234	0.67802	-0.997174	0.201187	0.512249	-1.75709	0.146181	0.44684	0.164631	1	1	-0.413158	0.704819	1	-2.60274	0.00213832	0.0100405	-0.250407	0.867096	0.962861	0.172746	1	1
Zm00001eb013750	333.495	194.015	178.585	133.26	140.445	105.09	205.615	150.41	248.905	131.89	186.435	274.635	-1.32342	1.13654e-10	1.3778e-09	-0.466163	0.0817541	0.295912	-0.764986	0.0341411	0.168604	-0.64061	0.0180912	0.111307	0.309772	0.259128	0.68377	0.14192	0.492445	0.944807	-0.0149086	0.717666	0.881664	0.408667	0.0136946	0.0430678	1.38589	1.16374e-05	0.000119415
Zm00001eb013760	32.98	35.27	22.825	13.97	16.065	12.69	21.315	16.11	20.395	8.745	16.065	16.765	-1.23926	2.75394e-06	1.62195e-05	-1.13452	9.63708e-05	0.0013228	-0.846923	0.0432087	0.195757	-1.28534	0.000315651	0.00424105	-0.00403551	1	1	-0.282763	0.327526	0.819206	-0.675802	0.0792992	0.197429	-3.20343e-16	0.893286	0.97827	0.40176	0.534095	0.756641
Zm00001eb013780	37.54	50.135	76.07	6.49	8.595	23.91	100.265	92.69	72.07	8.76	17.31	11.715	-2.53214	4.16625e-16	1.03602e-14	-2.54425	2.39069e-18	3.53363e-16	-1.66971	1.47951e-06	4.96918e-05	-3.51674	4.91715e-34	3.75801e-31	-2.42081	7.62011e-22	3.20487e-19	-2.62104	8.00507e-22	5.77121e-19	0.432712	0.198602	0.389892	1.01004	0.000755402	0.00347176	-1.02926	0.00165862	0.00914251
Zm00001eb013790	5.955	4.63	1.735	12.92	2.195	4.04	0.925	1.215	0.001	0.855	0.185	0.001	1.11743	0.00765336	0.020234	-1.07679	0.118867	0.380031	1.21942	0.0576872	0.239559	-0.113529	1	1	-2.71536	0.218855	0.634944	0	1	1	-3.91754	3.25695e-09	5.00403e-08	-3.56862	0.00785852	0.0268552	-11.9801	0.000249397	0.00179466
Zm00001eb013800	9.775	27.335	10.985	7.49	9.885	1.475	11.88	6.145	7.7	1.39	5.705	4.25	-0.384131	0.261018	0.383889	-1.46744	7.52752e-05	0.00106856	-2.89675	1.06246e-06	3.72735e-05	-3.09538	2.10057e-08	8.06253e-07	-0.107186	0.890742	1	-0.857396	0.235192	0.719448	-2.42988	5.86271e-05	0.000423842	-0.793014	0.128389	0.264389	1.52675	0.184515	0.38147
Zm00001eb013810	10.22	16.395	8.525	27.425	30.925	14.52	32.65	9.345	13.35	42.94	30.19	32.895	1.4241	1.97852e-06	1.194e-05	0.915518	0.00104356	0.0100521	0.76827	0.0356628	0.173158	0.395239	0.0755033	0.299443	1.6918	4.54121e-07	1.74656e-05	1.30103	0.000671784	0.012877	0.646831	0.0154858	0.0537125	-0.0347028	0.966744	1	1.17983	0.0116912	0.0459874
Zm00001eb013820	2.195	1.84	0.001	0.63	1.355	0.001	1.36	0.78	0.965	3.38	2.025	0.465	-1.8008	0.0383772	0.0801169	-0.441413	0.798835	0.995765	0	1	1	1.31342	0.110624	0.379335	1.37638	0.228054	0.6496	-1.0533	0.692706	1	2.4236	0.00942806	0.0354799	0.579629	0.642685	0.809324	8.86109	0.515424	0.742646
Zm00001eb013870	106.355	107.265	127.355	89.405	92.03	80.515	8.43	5.57	8.175	6.1	8.475	6.635	-0.25046	0.164914	0.267022	-0.221003	0.566578	0.877297	-0.661526	0.0656	0.257528	-0.466723	0.4154	0.784916	0.605536	0.203404	0.6119	-0.301122	0.56359	0.972309	-3.87347	5.25288e-38	6.75526e-36	-3.44082	6.74222e-41	8.76653e-39	-3.60109	1.27332e-27	1.70317e-25
Zm00001eb013880	18.175	13.965	9.705	10.89	11.27	6.56	6.25	2.915	8.155	12.84	5.26	8.235	-0.738951	0.010471	0.0265115	-0.309328	0.550336	0.867496	-0.565032	0.418041	0.752642	1.03872	0.0019364	0.0193305	0.851567	0.254651	0.676682	0.0140838	1	1	0.237641	0.337952	0.562496	-1.09935	0.0099771	0.0328421	0.328073	0.750883	0.914779
Zm00001eb013890	3.38	13.905	5.705	9.15	7.505	5.54	5.195	6.22	9.725	16.3	6.3	7.455	1.43675	0.00107668	0.00361912	-0.88968	0.0960661	0.330449	-0.0423409	0.889923	1	1.64968	9.58527e-07	2.55985e-05	0.0184372	1	1	-0.38349	0.365865	0.854479	0.833028	0.00481867	0.0200677	-0.2525	0.761425	0.896829	0.428322	0.654778	0.848175
Zm00001eb013900	119.545	42.915	40.375	34.865	39.75	34.73	65.42	35.85	74.745	40.29	57.975	110.755	-1.7777	2.11493e-14	4.25996e-13	-0.110527	0.949915	1	-0.21728	0.969112	1	-0.69931	0.0623831	0.265399	0.693458	0.00914986	0.0784067	0.567323	0.00831641	0.0902736	0.208642	0.266486	0.479821	0.544476	0.00381745	0.0144028	1.67312	5.97761e-08	9.39823e-07
Zm00001eb013910	3.84	2.01	3.73	10.065	3.285	0.35	7.755	12.35	4.355	11.84	2.755	4.205	1.39017	0.000776358	0.00270296	0.708698	0.285979	0.637515	-3.41375	0.00120816	0.0137691	0.61047	0.0495227	0.225763	-2.16439	0.00043793	0.00688239	-0.0505669	1	1	0.234322	0.346727	0.572336	-0.253841	0.864656	0.961264	3.58668	0.00306818	0.0152995
Zm00001eb013920	9.715	14.02	13.965	9.33	9.335	10.34	6.395	6.255	8.685	4.295	3.915	5.745	-0.0583369	0.874564	0.941321	-0.586764	0.153101	0.445591	-0.433579	0.596711	0.881729	-0.574286	0.414134	0.783948	-0.675998	0.220619	0.637577	-0.596219	0.176873	0.635444	-1.11922	0.0154152	0.0535233	-1.25364	0.00430693	0.0159405	-0.847857	0.0326929	0.104808
Zm00001eb013940	64.325	102.42	94.145	71.63	75.79	80.225	50.945	43.84	50.885	27.38	43.94	46.24	0.155184	0.605526	0.726926	-0.434418	0.138512	0.416668	-0.230833	0.895438	1	-0.895818	0.00262828	0.025004	0.00328707	0.94526	1	-0.138099	0.57727	0.980516	-1.38744	8.23855e-07	8.68294e-06	-0.786473	0.000763629	0.00350717	-0.79491	0.000781493	0.0048365
Zm00001eb013950	7.175	12.175	6.6	10.865	11.71	1.785	8.23	6.825	7.585	8.5	6.285	7.685	0.598637	0.102105	0.181867	-0.0561807	1	1	-1.88654	0.00488938	0.0404276	0.0465704	0.727721	0.972163	-0.118916	0.796411	1	0.0188961	1	1	-0.354153	0.560349	0.766847	-0.897756	0.0166335	0.0506571	2.10612	0.00551641	0.0249859
Zm00001eb013970	9.79	12.405	18.25	9.245	10.42	13.255	1.775	0.425	1.95	0.45	1.31	1.785	-0.0826355	0.759492	0.854436	-0.251566	0.669789	0.935448	-0.46136	0.40768	0.741588	-1.97982	0.109509	0.377365	1.62403	0.453248	0.875314	-0.12755	1	1	-4.36068	8.6781e-09	1.26158e-07	-2.99172	1.36733e-08	1.57184e-07	-2.89254	4.74961e-08	7.56583e-07
Zm00001eb013980	41.03	33.47	38.845	20.61	18.425	18.25	19.57	9.315	26	8.65	9.615	17.52	-0.993335	9.55051e-06	5.0881e-05	-0.861204	0.0041978	0.0317132	-1.08983	0.00210014	0.0211343	-1.17787	0.00209272	0.0206261	0.0457311	1	1	-0.569509	0.0377911	0.260492	-1.25257	0.000225518	0.00140386	-0.938306	0.00360652	0.0137003	-0.0588937	0.56749	0.784679
Zm00001eb013990	81.775	51.23	117.745	514.845	410.22	272.815	374.205	212.305	180.625	665.435	480.2	405.455	2.65441	4.28765e-24	2.43013e-22	3.00134	5.09379e-22	1.16898e-19	1.21226	0.00423004	0.0362798	0.830469	7.28222e-05	0.00121378	1.1775	1.55804e-06	5.24934e-05	1.16654	1.87303e-05	0.000644728	0.37016	0.0555539	0.149905	0.227238	0.21621	0.390715	0.571619	0.362923	0.601724
Zm00001eb014000	40.565	34.375	94.325	431.9	297.575	188.605	712.195	331.87	300.715	1171.58	767.35	666.765	3.41239	4.50839e-33	5.67559e-31	3.11382	2.45361e-22	5.88912e-20	0.999656	0.00777544	0.0571635	0.718111	0.000216352	0.00310431	1.20927	3.77402e-05	0.000844727	1.14878	3.08328e-06	0.00013893	1.43969	1.30478e-09	2.11269e-08	1.36663	5.88572e-09	7.11091e-08	1.82181	0.000145001	0.00112036
Zm00001eb014010	66.975	29.985	86.23	295.27	252.645	194.335	305.835	117.625	145.13	324.81	445.775	313.46	2.14034	8.89337e-14	1.64458e-12	3.0748	3.86743e-31	2.13496e-28	1.17228	0.00103366	0.0120606	0.0868425	0.275641	0.638645	1.92212	6.09797e-09	3.49474e-07	1.11094	0.0012648	0.0214338	0.137561	0.330679	0.554602	0.819204	0.00257833	0.0102327	0.689736	0.169509	0.358509
Zm00001eb014050	20.93	29.84	6.165	57.68	37.895	8.725	22.865	70.945	2.875	49.685	51.595	7.485	1.4625	6.47769e-11	8.10408e-10	0.34476	0.0834944	0.299805	0.501054	0.137466	0.409109	1.11967	5.35707e-07	1.52135e-05	-0.45947	0.0501442	0.265394	1.38044	0.0163402	0.146088	-0.215261	0.616222	0.809453	0.445224	0.0194188	0.057677	-0.221153	0.507996	0.738535
Zm00001eb014110	13.155	7.38	6.665	5.795	5.87	5.96	7.16	5.09	7.86	6.76	5.805	5.545	-1.18273	0.000276954	0.00107581	-0.33026	0.644218	0.920903	-0.161293	1	1	-0.0829363	0.9058	1	0.18963	0.7663	1	-0.503342	0.303813	0.796204	0.222215	0.498439	0.717431	-0.0160644	1	1	-0.104125	0.614303	0.820035
Zm00001eb014120	23.46	23.205	27.755	48.795	43.325	53.35	36.4	21.015	39.405	79.38	32.315	40.855	1.05653	1.03167e-05	5.4685e-05	0.900764	0.000176807	0.00221394	0.942741	2.51454e-05	0.000562064	1.12484	1.95679e-07	6.11144e-06	0.620785	0.0279068	0.177358	0.052134	0.849677	1	0.702042	0.000692429	0.00377534	-0.422996	0.0915854	0.203764	-0.384976	0.0473208	0.139057
Zm00001eb014130	9.375	23.505	22.64	19.145	19.045	17.41	18.335	14.2	20.485	13.66	15.99	20.585	1.03008	0.000664133	0.00234719	-0.303555	0.462365	0.806481	-0.378958	0.540555	0.842325	-0.424643	0.393125	0.761599	0.171279	0.694063	1	0.00702556	1	1	-0.48701	0.23511	0.440467	-0.252242	0.477408	0.671535	0.241677	0.863684	0.981501
Zm00001eb014160	20.245	20.315	9.25	15.37	12.515	2.125	17.84	11.87	17.005	9.415	10.935	8.935	-0.397448	0.115213	0.200243	-0.698887	0.0663849	0.256633	-2.12199	0.000311755	0.004571	-0.922083	0.0408764	0.196954	-0.118367	0.73111	1	-0.928419	0.0172576	0.151524	-0.707084	0.109781	0.25278	-0.194705	0.683831	0.839629	2.072	0.00201936	0.0107891
Zm00001eb014190	4.87	4.825	2.68	4.66	4.77	5.15	11.375	10.53	11.875	8.64	9.945	13.08	-0.0635918	0.909129	0.968137	-0.0165397	1	1	0.942339	0.0504782	0.218523	-0.396763	0.522099	0.86018	-0.0824622	0.922021	1	0.139435	0.721238	1	0.890701	0.0251934	0.0798175	1.05998	0.00656096	0.022975	1.34472	0.00619772	0.0273538
Zm00001eb014240	6.775	4.84	3.32	2.465	3.05	1.18	2.655	1.2	2.895	1.165	1.775	2.23	-1.45863	0.00158603	0.00510137	-0.666198	0.273913	0.623587	-1.4924	0.143814	0.419736	-1.18838	0.210393	0.557086	0.564785	0.774516	1	-0.37652	0.669801	1	-1.08126	0.256031	0.467926	-0.78099	0.322177	0.516242	0.918257	0.457402	0.693028
Zm00001eb014250	2.025	6.435	4.055	5.41	6.975	2.68	3.255	2.23	2.725	3.44	3.695	3.84	1.41771	0.00782664	0.0206344	0.116253	0.759719	0.980783	-0.597469	0.557731	0.85292	0.079751	0.856759	1	0.728531	0.308842	0.74088	0.49485	0.573257	0.97845	-0.65322	0.339415	0.564298	-0.916619	0.0575233	0.141225	0.518873	0.726578	0.899247
Zm00001eb014450	3.405	2.22	1.69	2.05	8.96	8.605	3.89	3.14	2.26	1.54	2.785	5.825	-0.732031	0.301202	0.429006	2.01294	2.96963e-05	0.000471143	2.34815	6.61812e-06	0.0001781	-1.33684	0.102935	0.362728	-0.173087	1	1	1.36594	0.0393669	0.267466	-0.412694	0.821766	0.945776	-1.68582	0.000339376	0.00169773	-0.562917	0.139002	0.311313
Zm00001eb014470	24.82	56.44	36.345	18.41	20.95	16.63	20.53	13.045	20.09	10.485	4.93	5.635	-0.431013	0.120952	0.208445	-1.42977	2.48077e-05	0.000400135	-1.12797	0.00157745	0.0169452	-0.969407	0.00809805	0.0605025	-1.40384	0.000494591	0.00762723	-1.83399	4.66641e-07	2.60456e-05	-0.812163	0.0275212	0.0856703	-2.08729	2.38272e-10	3.42022e-09	-1.5613	0.00010426	0.00084071
Zm00001eb014480	3.02	91.61	82.86	37.25	44.415	25.665	47.785	25.895	34.835	16.845	14.135	13.41	3.62462	2.37312e-25	1.47251e-23	-1.04446	0.000114579	0.00152551	-1.69087	0.000132707	0.00222142	-1.50424	8.4376e-08	2.86229e-06	-0.873402	0.021867	0.14919	-1.37723	3.34274e-05	0.00105931	-1.14492	2.79592e-05	0.000217787	-1.65178	1.31003e-11	2.17811e-10	-0.936493	0.0278364	0.0924109
Zm00001eb014490	3.94	14.31	4.12	14.71	7.82	5.775	2.09	7.855	2.76	1.47	3.95	1.985	1.90053	1.59496e-07	1.18581e-06	-0.871783	0.0279057	0.137905	0.487177	0.208401	0.524299	-0.507687	0.812027	1	-0.991759	0.0422175	0.23649	-0.475529	0.671855	1	-3.32291	5.96305e-11	1.16088e-09	-0.985316	0.0273876	0.0770564	-1.54068	0.00527584	0.0240627
Zm00001eb014500	93.23	98.115	133.18	66.81	75.58	96.195	21.065	30.845	28.365	14.695	14.795	14.645	-0.48073	0.0126446	0.031168	-0.376469	0.218138	0.550437	-0.469344	0.285717	0.620199	-0.519523	0.223442	0.575457	-1.05993	0.000100557	0.00197599	-0.953704	0.000539815	0.0107373	-2.18474	9.7541e-16	3.05876e-14	-2.35289	4.95659e-21	1.96685e-19	-2.71555	7.58704e-20	5.27289e-18
Zm00001eb014510	3.165	10.65	12.615	5.415	5.85	8.84	5.705	6.78	6.18	3.17	2.85	3.695	0.774756	0.142933	0.237995	-0.864345	0.0554645	0.226269	-0.513022	0.380928	0.716023	-0.847744	0.245218	0.604583	-1.25032	0.0208243	0.144304	-0.742032	0.17955	0.63901	-0.772478	0.235751	0.441478	-1.03747	0.065525	0.156216	-1.25847	0.0053279	0.0242714
Zm00001eb014530	1.005	0.95	0.87	3.455	2.095	0.98	0.27	0.001	0.001	0.23	0.325	0.32	1.78149	0.0287125	0.0626687	1.14095	0.187067	0.503244	0.171766	1	1	-0.231326	1	1	8.3443	1	1	8.32193	1	1	-3.90898	0.000311822	0.00186514	-2.68844	0.0415839	0.108657	-1.61471	0.397825	0.636606
Zm00001eb014560	8.335	16.265	9.67	9.505	9.8	2.325	4.485	2.99	4.58	1.58	2.96	2.055	0.189504	0.676688	0.78811	-0.730917	0.0928116	0.322848	-2.05629	0.000301923	0.00444691	-1.50518	0.0374546	0.186198	-0.0145483	1	1	-1.15621	0.184806	0.645135	-2.58876	3.35783e-06	3.16152e-05	-1.72718	0.000527202	0.00251893	-0.178092	0.867288	0.983407
Zm00001eb014570	1.545	0.53	0.595	0.335	1.275	0.001	1.575	1.6	1.98	1.14	1.69	2.435	-2.20537	0.0472247	0.0953856	1.26643	0.292683	0.64612	-9.21675	0.501697	0.815753	-0.466318	0.794136	1	0.0789513	1	1	0.298421	0.821871	1	1.7668	0.366071	0.592337	0.406526	0.609517	0.784669	11.2497	0.00548434	0.0248523
Zm00001eb014580	14.415	36.1	53.055	29.155	44.36	42.475	3.96	4.68	5.415	4.38	3.935	7.13	1.01617	0.000850176	0.00293266	0.297261	0.126847	0.396246	-0.320875	0.634148	0.901478	0.14543	0.639	0.928461	-0.250145	0.728658	1	0.396941	0.429383	0.905224	-2.73474	1.12734e-11	2.35957e-10	-3.49482	7.52552e-29	4.9526e-27	-2.57464	1.07978e-14	4.35478e-13
Zm00001eb014590	19.375	110.14	134.545	101.65	108.655	108.75	12.375	10.275	13.945	9.195	7.46	14.425	2.39134	1.62724e-22	8.0395e-21	-0.0195839	0.772053	0.986542	-0.307073	0.673624	0.928747	-0.428507	0.50508	0.850741	-0.461891	0.204768	0.614093	0.0488234	0.940413	1	-3.46662	1.16434e-31	1.02789e-29	-3.86444	4.12734e-48	7.78527e-46	-2.91437	1.10928e-18	6.91493e-17
Zm00001eb014600	10.17	2.25	1.59	4.255	1.895	1.845	0.965	2.545	1.845	1.945	1.895	1.27	-1.25709	0.000765572	0.00266753	-0.247727	1	1	0.214594	0.825387	1	1.01117	0.270849	0.632366	-0.425468	0.629281	0.976851	-0.538792	0.775849	1	-1.12939	0.0903788	0.217691	0	1	1	-0.538792	0.627081	0.829521
Zm00001eb014650	5.7	4.685	3.84	3.26	3	2.305	14.495	14.825	8.515	12.255	13.765	7.635	-0.80609	0.115729	0.200979	-0.643087	0.464984	0.807891	-0.73634	0.541763	0.842325	-0.242185	0.778963	0.995249	-0.107027	0.721283	1	-0.157378	0.828906	1	1.91043	2.13042e-05	0.000170517	2.19797	1.48647e-06	1.23919e-05	1.72786	0.00857282	0.0356939
Zm00001eb014660	0.835	3.025	1.99	1.545	2.475	2.81	24.06	29.04	22.8	23.54	20.905	19.87	0.887759	0.529125	0.658264	-0.289507	1	1	0.497802	0.35976	0.696426	-0.0315223	0.721801	0.97055	-0.474193	0.0652087	0.312705	-0.198442	0.487739	0.941636	3.92944	1.22468e-17	4.50605e-16	3.07835	2.35363e-13	4.88319e-12	2.82195	1.19566e-08	2.10908e-07
Zm00001eb014680	26.86	113.22	18.24	8.26	28.085	0.24	12.72	27.48	35.84	19.655	5.06	0.001	-1.70125	0.000205495	0.000824152	-2.01126	0.000174908	0.0021968	-6.24793	2.61744e-13	5.00315e-11	0.627798	0.295861	0.664772	-2.44117	0.000129203	0.00244493	-15.1293	1.00581e-07	6.79742e-06	1.25068	0.0855992	0.209224	-2.47259	0.000836836	0.00380683	-7.90689	1	1
Zm00001eb014690	15.15	100.965	10.74	3.98	28.94	0.001	33.25	52.735	93.755	46.97	10.585	0.001	-1.92848	0.0110607	0.0277924	-1.80272	0.000263048	0.00309721	-13.3907	1.46348e-07	6.68621e-06	0.498385	0.35638	0.730276	-2.31674	0.0120643	0.0965887	-16.5166	1.44553e-07	9.35593e-06	3.5609	0.000492495	0.00279341	-1.45104	0.0920012	0.204536	0	1	1
Zm00001eb014700	21.265	101.5	13.44	5.55	23.27	0.27	44.765	81.03	126.42	67.75	14.85	0.27	-1.93792	8.71677e-05	0.000380859	-2.12494	5.23428e-05	0.000778949	-5.63743	1.37933e-08	8.87548e-07	0.59785	0.286898	0.653666	-2.44799	0.00424732	0.0430773	-8.87105	4.55342e-08	3.44547e-06	3.60966	1.39592e-05	0.000116686	-0.648008	0.47624	0.670385	0	1	1
Zm00001eb014710	0.001	2.075	0.001	0.001	0.001	0.001	4.885	4.025	10.23	5.925	1.775	0.001	0	1	1	-11.0189	0.00509074	0.0369757	0	1	1	0.278457	0.650502	0.934399	-1.18117	0.284887	0.715468	-13.3205	0.000361711	0.00773298	12.5326	9.88216e-05	0.000676748	10.7936	0.0175818	0.0530324	0	1	1
Zm00001eb014730	15.41	6.72	5.055	6.67	6.895	5.825	8.08	6.98	8.345	7.855	11.12	9.165	-1.20811	0.000108717	0.000465462	0.0370893	0.820614	1	0.204547	0.466723	0.793086	-0.040744	0.827467	1	0.671858	0.122124	0.465573	0.135223	0.73868	1	0.235925	0.466345	0.689645	0.689534	0.0349996	0.0945002	0.653877	0.327878	0.562916
Zm00001eb014770	2.91	15.515	19.46	14.21	9.53	9.135	12.82	9.74	14.165	15.11	15.64	12.94	2.28782	1.58698e-09	1.61756e-08	-0.703116	0.0758455	0.2807	-1.09104	0.0115771	0.0776668	0.237107	0.278455	0.643299	0.683247	0.0784392	0.352105	-0.130493	0.741285	1	0.0885971	0.547449	0.757055	0.714692	0.0132161	0.0417742	0.502361	0.418544	0.656776
Zm00001eb014820	13.25	5.83	7.585	4.745	4.265	3.855	6.23	3.955	6.73	3.285	4.725	6.3	-1.48151	1.94332e-05	9.73334e-05	-0.45095	0.501021	0.834965	-0.976418	0.112736	0.366107	-0.923339	0.131177	0.420663	0.256637	0.737152	1	-0.0952547	0.897169	1	-0.530515	0.461759	0.685731	0.147769	0.777205	0.907541	0.708621	0.426874	0.665059
Zm00001eb014880	23.35	24.185	35.47	50.735	31.76	38.975	31.42	27.835	25.9	29.415	26.165	33.235	1.11956	1.09537e-06	6.93979e-06	0.393098	0.0624591	0.246501	0.13595	0.2438	0.570872	-0.0951311	0.897264	1	-0.0892618	0.697134	1	0.359751	0.152807	0.58746	-0.786429	0.00412642	0.0176294	-0.279573	0.346472	0.54226	-0.229846	0.170409	0.359852
Zm00001eb014890	52.59	21.95	14.155	25.33	27.71	22.805	21.875	20.365	17.275	19.98	25.165	15.71	-1.05394	8.99907e-05	0.000391885	0.336186	0.110919	0.362734	0.688038	0.00572919	0.0457701	-0.130726	1	1	0.305327	0.314441	0.747913	-0.137003	0.730368	1	-0.34229	0.461612	0.685601	-0.138988	0.771033	0.903654	-0.537667	0.040718	0.124136
Zm00001eb014930	4.415	3.56	5.35	7.47	9.105	9.795	4.665	4.01	9.48	7.79	4.97	12.23	0.758695	0.0855632	0.156955	1.35478	0.0036662	0.0284277	0.872507	0.0132118	0.0850484	0.739746	0.0560742	0.245841	0.309644	0.752467	1	0.367465	0.367018	0.855262	0.0605151	0.760691	0.911432	-0.873413	0.0811494	0.185301	0.320307	0.756361	0.918182
Zm00001eb014950	6.36	12.355	11.47	10.32	10.33	10.85	5.835	6.435	7.59	3.775	5.435	6.5	0.698344	0.0702102	0.133029	-0.258255	0.742548	0.973177	-0.0801703	0.852726	1	-0.628256	0.307446	0.676023	-0.24366	0.679674	1	-0.22366	0.703249	1	-1.45089	0.00242069	0.0111371	-0.926488	0.0273779	0.0770373	-0.739183	0.0486886	0.14212
Zm00001eb014980	5.295	43.63	35.945	45.785	42.435	28.765	13.295	14.815	14.445	14.35	14.36	16.135	3.11217	4.66604e-23	2.40987e-21	-0.0400658	0.911012	1	-0.321477	0.684471	0.935467	0.110167	0.553023	0.880803	-0.0450029	0.873457	1	0.159623	0.637763	1	-1.67382	1.74452e-06	1.72702e-05	-1.5632	1.39767e-10	2.05809e-09	-0.834121	0.00375636	0.0180677
Zm00001eb015000	4.17	8.85	4.21	5.355	6.59	3.785	2.33	2.645	1.295	1.475	2.095	0.575	0.360839	0.549803	0.677136	-0.425399	0.521408	0.846901	-0.153527	1	1	-0.659615	0.635202	0.926774	-0.336317	0.814655	1	-1.17132	0.461672	0.926856	-1.86017	0.0062689	0.025084	-1.65333	0.00238254	0.00953335	-2.71866	0.00554966	0.0250927
Zm00001eb015010	177.865	60.15	63.175	54.96	67.485	53.57	50.025	48.205	58.25	49.99	51.44	53.935	-1.69433	9.40039e-17	2.56139e-15	0.166002	0.34376	0.700861	-0.237928	0.868526	1	-0.00100974	0.561081	0.886735	0.0937078	0.775134	1	-0.111036	0.642554	1	-0.136742	0.88336	0.979889	-0.391676	0.103142	0.223844	0.00979649	0.630779	0.832056
Zm00001eb015020	0.825	0.505	0.35	8.47	4.47	3.73	0.615	0.63	0.775	2.68	0.855	1.455	3.3599	5.49612e-06	3.0653e-05	3.14592	0.000444105	0.00488179	3.41375	0.000277671	0.00413658	2.12357	0.0312774	0.164235	0.440573	1	1	0.908751	0.519185	0.95105	-1.66013	0.0172974	0.0588364	-2.38628	0.00203031	0.00832674	-1.35816	0.0837098	0.214511
Zm00001eb015040	18.615	12.835	13.585	8.765	11.27	10.98	20.75	17.92	25.3	15.98	23.125	23.05	-1.08664	0.000161624	0.000666265	-0.187596	0.805916	0.99834	-0.307137	0.790976	0.985819	-0.376844	0.476265	0.833776	0.367883	0.241288	0.665355	-0.134371	0.644069	1	0.866441	0.0033262	0.0146529	1.03697	4.07654e-05	0.000254404	1.06989	0.00790362	0.0333881
Zm00001eb015050	6.005	2.86	3.71	8.865	7.275	7.915	3.68	7.255	5.975	9.075	10.87	6.51	0.561956	0.187629	0.296325	1.34693	0.0087779	0.0563829	1.09317	0.0133074	0.0855015	1.30219	0.00514453	0.0428738	0.583304	0.211904	0.624291	0.123719	0.89489	1	0.033777	0.804327	0.937317	0.579333	0.0798524	0.182876	-0.281932	0.391578	0.63059
Zm00001eb015080	9.54	9.31	6.245	34.47	16.03	4.955	3.49	2.255	2.085	2.015	2.96	1.47	1.85328	2.09963e-12	3.28427e-11	0.783921	0.0109595	0.06748	-0.333817	0.8939	1	-0.792447	0.493522	0.846591	0.39247	0.663876	0.99575	-0.504231	0.794129	1	-4.09649	2.7328e-24	1.66136e-22	-2.43711	5.90931e-10	8.04682e-09	-1.75307	0.0247323	0.0839273
Zm00001eb015120	18.34	13.52	21.845	37.235	37.925	20.465	25.05	23.57	23.165	47.68	30.835	28.845	1.02167	0.0011293	0.00377564	1.48805	1.60941e-08	5.30294e-07	-0.0941444	0.769604	0.977835	0.928574	6.03607e-05	0.00103461	0.387617	0.178091	0.569523	0.316375	0.322859	0.814691	0.356725	0.0700766	0.179703	-0.29858	0.291449	0.481643	0.495163	0.34435	0.581704
Zm00001eb015130	3.875	2.98	1.51	36.74	16.82	9.135	0.29	1.52	0.001	34.7	9.22	8.73	3.24508	2.27172e-15	5.16362e-14	2.49679	2.71314e-08	8.63517e-07	2.59686	0.00213795	0.0214009	6.90274	1.41504e-25	4.83813e-23	2.6007	3.1774e-05	0.000727803	13.0918	5.47057e-09	5.10731e-07	-0.082416	0.979225	1	-0.867339	0.0184651	0.0552922	-0.0654231	0.771559	0.928032
Zm00001eb015160	11.935	14.545	10.57	24.52	24.37	24.955	33.725	29.95	44.91	67.6	30.21	58.425	1.03876	0.00010373	0.000446076	0.744583	0.00350147	0.027435	1.23935	8.42506e-06	0.000218363	1.0032	8.82402e-07	2.37608e-05	0.0124702	1	1	0.379549	0.127616	0.538395	1.46306	2.87281e-11	5.79086e-10	0.30992	0.0994368	0.217368	1.22726	0.000157414	0.00120473
Zm00001eb015200	729.745	1277.65	988.79	1982.44	1522.02	1208.49	673.06	715.07	623.105	1210.62	1018.73	1047.49	1.44182	1.41206e-12	2.26978e-11	0.252484	0.126874	0.39627	0.289469	0.0445436	0.200165	0.846945	1.40503e-06	3.59347e-05	0.510615	0.0362528	0.212912	0.749396	0.000226641	0.00526611	-0.711529	0.00143923	0.00707574	-0.579211	0.00217279	0.0087966	-0.206262	0.142957	0.316707
Zm00001eb015210	81.67	116.35	56.65	188.51	211.88	168.065	100.93	149.835	81.94	113.725	278.26	145.52	1.20676	2.86693e-08	2.41384e-07	0.864776	0.00013713	0.00178843	1.56887	3.31778e-07	1.35041e-05	0.172194	0.147458	0.449887	0.893059	7.91887e-05	0.00159133	0.828578	9.00634e-05	0.00241978	-0.729092	0.00536309	0.0219488	0.393186	0.0249606	0.0712076	-0.207802	0.265702	0.488665
Zm00001eb015230	20.385	12.555	10.265	9.255	11.83	7.88	9.855	12.59	10.41	13.14	13.81	8.925	-1.1392	0.00011138	0.000475771	-0.085812	1	1	-0.381466	0.667174	0.923701	0.415037	0.104698	0.366711	0.133435	0.804865	1	-0.222046	0.604462	0.992299	0.50566	0.0699354	0.179392	0.223263	0.373388	0.570241	0.179657	1	1
Zm00001eb015250	4.035	3.355	2.77	2.18	3.18	1.385	30.78	27.965	18.625	13.815	24.08	13.64	-0.888241	0.132448	0.223651	-0.077286	1	1	-1	0.454877	0.781971	-1.15576	0.000863486	0.00993257	-0.215787	0.365316	0.803812	-0.449397	0.152986	0.587801	2.66384	1.13749e-07	1.39444e-06	2.92074	6.76153e-17	1.94949e-15	3.29989	4.58215e-08	7.321e-07
Zm00001eb015260	17.635	18.91	16.965	16.035	13.43	8.85	22.65	23.615	23.32	15.91	23.91	25.315	-0.137217	0.558301	0.684768	-0.49369	0.195544	0.516331	-0.938812	0.0297625	0.153984	-0.509577	0.199287	0.539593	0.0179106	1	1	0.118425	0.684203	1	-0.0112905	0.797768	0.933458	0.832155	0.000776355	0.00356073	1.51624	0.000129611	0.0010165
Zm00001eb015280	12.585	38.58	20.455	18.6	19.73	4.975	25.73	29.115	22.93	20.815	29.725	14.165	0.563597	0.101948	0.18166	-0.967462	0.00183651	0.0160209	-2.03969	2.20806e-05	0.000504401	-0.305828	0.708551	0.96383	0.0299142	1	1	-0.694906	0.0399315	0.26912	0.162321	0.585474	0.786109	0.591286	0.00551871	0.0197343	1.50956	0.0114462	0.0452376
Zm00001eb015380	40.165	62.12	74.29	61.54	68.36	77.875	143.37	121.28	158.705	160.76	114.74	170.535	0.615586	0.00531	0.0147244	0.138095	0.342985	0.700607	0.0679922	0.310433	0.644055	0.165165	0.136862	0.430648	-0.0799732	0.647533	0.987013	0.10372	0.628893	0.999434	1.38531	1.64324e-11	3.37079e-10	0.747144	5.54978e-05	0.000335404	1.13084	0.000258122	0.00184696
Zm00001eb015390	4.19	7.305	3.735	4.58	25.08	7.925	5.095	3.175	4.165	2.805	9.565	7.89	0.128397	0.89986	0.960768	1.77958	5.91701e-09	2.13224e-07	1.0853	0.0149672	0.0933197	-0.861081	0.189761	0.525462	1.59101	0.00225904	0.0261576	0.921709	0.0849845	0.430799	-0.707347	0.358682	0.584738	-1.3907	1.12162e-06	9.54642e-06	-0.00638564	0.771556	0.928032
Zm00001eb015400	4.75	3.595	1.02	7.115	16.805	4.36	1.63	7.1	4.415	11.91	33.57	8.55	0.582936	0.227093	0.344981	2.22483	1.26869e-08	4.26078e-07	2.09576	0.00462262	0.0386647	2.86923	2.53472e-09	1.15552e-07	2.24128	2.10321e-10	1.62258e-08	0.953511	0.0926582	0.451833	0.743238	0.0300769	0.0920933	0.998282	4.30185e-05	0.000267468	0.971596	0.167831	0.356175
Zm00001eb015500	8.83	4.195	7.79	5.565	5.6	5.37	4.635	2.6	4.245	3.505	2.11	5.525	-0.666032	0.0681087	0.129694	0.416756	0.343362	0.70076	-0.536701	0.511433	0.819932	-0.403155	0.762629	0.989168	-0.301269	0.814655	1	0.38021	0.545227	0.964296	-0.666967	0.307047	0.528507	-1.40818	0.0126119	0.0401678	0.0410524	0.897601	0.999637
Zm00001eb015510	91.33	227.59	279.35	178.345	237.34	252.88	110.91	147.255	133.71	136.665	118.56	157.64	0.96551	2.60382e-06	1.54116e-05	0.0605181	0.488851	0.826753	-0.143621	0.854214	1	0.301254	0.0432409	0.20489	-0.312699	0.125602	0.46907	0.237526	0.242448	0.729545	-0.384027	0.18054	0.364665	-1.00134	2.19098e-07	2.11479e-06	-0.681819	0.00103304	0.00613578
Zm00001eb015530	16.465	26.455	38.115	34.655	40.44	41.98	32.395	36.155	31.865	55.935	37.985	44.955	1.07366	0.0014209	0.00462878	0.612243	0.00630658	0.0438694	0.139343	0.204957	0.51865	0.78798	6.68515e-05	0.00112801	0.0712346	0.896813	1	0.496509	0.0336108	0.240846	0.690688	0.000770421	0.00414731	-0.0903532	0.917033	0.993518	0.0987794	0.853817	0.975913
Zm00001eb015550	24.16	33.76	25.23	52.55	63.125	50.18	34.115	63.15	37.945	72.485	77.08	57.38	1.12107	4.28655e-07	2.94139e-06	0.902897	3.86471e-05	0.000594406	0.991972	8.3884e-06	0.00021763	1.08728	1.63373e-07	5.15825e-06	0.287574	0.300859	0.732944	0.596638	0.00958521	0.100461	0.463992	0.0143503	0.0504477	0.288145	0.0928951	0.206181	0.193435	0.922983	1
Zm00001eb015570	15.715	73.715	89.59	147.11	167.98	221.475	73.47	98.465	105.135	126.77	83.305	115.255	3.22668	5.20701e-41	1.32374e-38	1.18826	9.28112e-09	3.20333e-07	1.30573	2.5778e-05	0.000573738	0.786986	2.55651e-05	0.000484793	-0.241208	0.281864	0.712213	0.132586	0.581123	0.982507	-0.214682	0.5817	0.782573	-1.01181	4.26408e-07	3.89807e-06	-0.942315	0.00136587	0.00780188
Zm00001eb015600	0.001	0.001	0.001	0.2	0.001	0.001	193.01	284.995	56.32	254.435	68.415	35.555	7.64386	1	1	0	1	1	0	1	1	0.398622	0.0515088	0.232209	-2.05855	1.25276e-09	8.26245e-08	-0.663595	0.0222117	0.182085	10.3131	3.41416e-75	6.08837e-72	16.062	1.89588e-58	7.25445e-56	15.1178	2.73554e-22	2.34886e-20
Zm00001eb015610	1.11	2.99	2.53	3.49	2.375	2.41	107.67	154.655	37	157.805	37.06	21.3	1.65267	0.012459	0.0307773	-0.332218	0.845041	1	-0.0701042	1	1	0.551527	0.0181441	0.111539	-2.06112	4.20816e-09	2.47702e-07	-0.796672	0.00552543	0.0661471	5.49877	7.22518e-51	2.1474e-48	3.96386	6.26026e-29	4.16082e-27	3.14375	1.50989e-08	2.61655e-07
Zm00001eb015620	129.16	157.275	122.635	482.495	720.465	278.045	390.87	189.83	154.195	887.745	863.695	424.07	1.90135	9.94891e-10	1.04456e-08	2.19564	1.90106e-22	4.69204e-20	1.18095	1.1431e-06	3.97273e-05	1.18346	1.80297e-09	8.53371e-08	2.18581	1.15634e-21	4.78616e-19	1.45955	3.51232e-10	4.25976e-08	0.879631	0.000304384	0.00182596	0.261594	0.0792818	0.181812	0.608984	0.101742	0.24748
Zm00001eb015630	103.33	98.76	143.42	185.38	160.095	317.025	102.86	192.46	133.83	232.895	134.18	136.59	0.843226	7.76533e-05	0.000343878	0.69693	0.00081479	0.00813298	1.14435	2.05293e-05	0.000471865	1.179	2.14482e-06	5.25785e-05	-0.520389	0.0248396	0.163334	0.0294503	0.91171	1	0.329194	0.117215	0.265823	-0.254759	0.395567	0.592371	-1.21474	4.99539e-05	0.000439126
Zm00001eb015670	22.1	64.185	69.055	38.145	41.01	39.46	0.001	0.001	0.001	0.001	0.2	0.001	0.787448	0.000950904	0.00324422	-0.64626	0.0291539	0.142341	-0.807355	0.0247053	0.134051	0	1	1	7.64386	1	1	0	1	1	-15.2192	1.77992e-38	2.38055e-36	-7.67983	3.62231e-39	4.21842e-37	-15.2681	2.82557e-28	4.0436e-26
Zm00001eb015700	21.01	29.89	24.09	30.835	21.375	10.675	26.18	16.175	21.84	19.39	17.52	19.085	0.553493	0.0287378	0.0626972	-0.483738	0.141432	0.422632	-1.1742	0.00192557	0.0198403	-0.433152	0.304274	0.671985	0.115237	0.779297	1	-0.194534	0.55838	0.970327	-0.669256	0.0312616	0.095176	-0.286922	0.389907	0.587779	0.838203	0.0844976	0.215938
Zm00001eb015720	29.185	35.31	23.85	25.995	28.955	25.095	47.49	31.135	49.38	24.68	48.45	83.485	-0.166993	0.416802	0.552354	-0.286264	0.489977	0.827428	0.0734107	0.502242	0.815832	-0.944281	0.000907796	0.0104008	0.637959	0.0173716	0.125968	0.75759	0.000828542	0.0152944	-0.0748918	0.965337	1	0.742684	0.000858441	0.00389586	1.73412	3.56095e-06	4.04719e-05
Zm00001eb015770	0.001	0.285	0.001	0.265	1.29	0.001	0.001	0.001	0.001	0.77	23.05	3.66	8.04985	0.504751	0.636194	2.17834	0.132084	0.404778	0	1	1	9.58871	0.125057	0.408229	14.4925	4.27557e-17	9.86635e-15	11.8376	6.46797e-05	0.00183574	1.53887	0.385178	0.610918	4.15932	2.73991e-17	8.19068e-16	11.8376	0.00023807	0.00172999
Zm00001eb015800	25.88	23.615	26.93	89.02	82.555	69.91	35.625	28.245	33.055	114.04	74.965	51.385	1.78229	4.79426e-13	8.12543e-12	1.80565	1.35274e-13	1.0199e-11	1.37628	6.93698e-08	3.51528e-06	1.67858	1.99141e-15	2.25968e-13	1.40822	1.59079e-07	6.8226e-06	0.636479	0.00789568	0.0869264	0.357339	0.0574725	0.154027	-0.139138	0.701752	0.852871	-0.444152	0.0298909	0.0976601
Zm00001eb015810	12.95	14.49	7.975	9.415	11.135	8.335	5.375	4.205	6.075	4.495	4.235	8.515	-0.459919	0.126616	0.216384	-0.379956	0.457905	0.804992	0.0636977	0.579396	0.869947	-0.257944	0.885301	1	0.0102562	1	1	0.487122	0.269942	0.763695	-1.06664	0.0166373	0.0569649	-1.39467	0.00178798	0.00744461	0.0308243	0.848211	0.972589
Zm00001eb015830	4.735	8.645	11.995	11.085	7.615	7.455	8.18	10.62	12.51	10.275	6.995	8.055	1.22717	0.000824	0.00285252	-0.183022	0.922444	1	-0.686153	0.260702	0.588525	0.328966	0.268324	0.629504	-0.602388	0.153607	0.523933	-0.635125	0.107328	0.489731	-0.10947	1	1	-0.12252	0.922409	0.997043	0.111676	1	1
Zm00001eb015860	93.97	23.965	30.085	19.66	28.395	28.57	54.92	57.265	51.82	32.615	49.885	50.22	-2.25694	4.11668e-23	2.13456e-21	0.244708	0.215018	0.546518	-0.0745433	0.733215	0.959993	-0.751796	0.00616946	0.0494184	-0.199048	0.384347	0.819077	-0.045247	0.856819	1	0.730272	0.000674835	0.00369157	0.812969	0.000220709	0.0011628	0.813761	0.0307087	0.0998796
Zm00001eb015870	1.32	4.045	1.715	0.855	2.865	0.001	0.001	7.745	0.64	1.305	1.095	0.605	-0.626542	0.602522	0.724215	-0.497605	0.632158	0.916413	-10.744	0.0312984	0.158634	10.3498	0.0336019	0.172763	-2.82233	0.00174158	0.021054	-0.0811368	1	1	0.610053	0.567126	0.772014	-1.3876	0.145805	0.291701	9.24079	0.517513	0.742685
Zm00001eb015890	30.14	24.78	33.57	56.125	31.645	21.34	44.14	28.1	54.825	38.965	31.34	63.015	0.896964	3.98767e-05	0.0001877	0.352801	0.0809417	0.293988	-0.653612	0.180962	0.481862	-0.179908	0.915359	1	0.157435	0.689266	1	0.200861	0.424052	0.902192	-0.526465	0.139852	0.302197	-0.0139724	0.872412	0.966094	1.56214	6.80636e-05	0.000579008
Zm00001eb015900	41.335	18.435	15.93	19.08	21.275	17.62	17.155	16.165	16.715	19.34	16.64	20.375	-1.1153	5.74678e-07	3.85055e-06	0.206712	0.319549	0.675284	0.145468	0.320957	0.657856	0.172959	0.299617	0.668306	0.0417819	1	1	0.285657	0.326023	0.817418	0.0195266	0.687505	0.860515	-0.354504	0.269473	0.456237	0.209586	0.953544	1
Zm00001eb015920	66.765	16.855	22.42	12.565	13.79	14.2	19.31	12.61	21.71	10.12	17.235	23.915	-2.40968	5.07585e-24	2.83998e-22	-0.289554	0.572448	0.880809	-0.658895	0.146066	0.423175	-0.932139	0.0143472	0.094287	0.450773	0.197871	0.602636	0.139556	0.654619	1	-0.312201	0.537895	0.749188	0.321719	0.171948	0.330295	0.752025	0.103672	0.250707
Zm00001eb015940	101.63	22.57	26.085	17.74	16.125	18.525	24.775	18.035	21.75	14.84	18.05	22.725	-2.51825	7.15197e-27	5.24578e-25	-0.485107	0.168131	0.472922	-0.493747	0.363651	0.700183	-0.739394	0.034491	0.17595	0.00119941	1	1	0.0632649	0.854753	1	-0.257515	0.621729	0.813592	0.1627	0.434955	0.63193	0.294807	0.686323	0.870594
Zm00001eb015950	0.865	3.355	3.845	3.895	3.66	2.625	2.865	3.97	3.915	4.955	1.87	2.56	2.17085	0.001617	0.00519395	0.125531	0.872134	1	-0.550666	0.691094	0.936781	0.79035	0.0980444	0.352036	-1.0861	0.134121	0.486762	-0.612868	0.399208	0.878651	0.347262	0.485927	0.70706	-0.968805	0.199581	0.368954	-0.0361736	1	1
Zm00001eb015960	24.19	30.85	48.28	65.345	45.565	63.695	31.675	25.28	30.87	50.585	24.455	36.77	1.43367	2.71294e-10	3.12531e-09	0.562656	0.00835578	0.0542576	0.399754	0.0506532	0.219243	0.675365	0.000415904	0.00536075	-0.047867	0.811396	1	0.252324	0.297861	0.790154	-0.369367	0.24715	0.456877	-0.897797	0.00010651	0.000603526	-0.792651	0.00214549	0.0113409
Zm00001eb015970	3.63	13.185	23.79	38.56	27.425	29.605	21.595	14.22	21.535	42.455	21.915	36.27	3.40906	1.11243e-28	9.51926e-27	1.05659	4.33602e-05	0.000659528	0.315486	0.0791587	0.290733	0.975237	1.71456e-05	0.000338114	0.623997	0.0426109	0.23803	0.752093	0.00553047	0.066177	0.138829	0.316914	0.539018	-0.323573	0.256488	0.440189	0.292936	0.670617	0.859726
Zm00001eb015980	0.39	0.295	0.001	4.18	3.415	1.95	0.51	1.5	2.335	7.005	2.67	2.36	3.42196	0.000102115	0.000439919	3.5331	0.000550698	0.00587097	10.9293	0.00783511	0.0572126	3.77982	3.24313e-07	9.69766e-06	0.831877	0.35581	0.79463	0.0153643	1	1	0.744882	0.104682	0.243935	-0.355046	0.750167	0.889018	0.275313	1	1
Zm00001eb015990	8.955	17.575	9.79	17.33	40.415	13.695	15.575	22.65	16.73	18.615	52.65	28.41	0.952506	0.00163823	0.0052542	1.20137	5.16558e-07	1.22522e-05	0.484269	0.0562974	0.235707	0.257233	0.185454	0.519204	1.21692	1.29658e-06	4.44278e-05	0.763961	0.00478611	0.0594347	0.103194	0.476645	0.698914	0.381543	0.0315914	0.0867321	1.05275	0.00559279	0.0252406
Zm00001eb016040	7.5	13.445	12.51	11.905	9.725	2.465	10.18	7.93	7.94	2.52	5.81	6.58	0.666605	0.0708746	0.134055	-0.4673	0.281044	0.631672	-2.34342	1.85923e-05	0.000434254	-2.01424	0.000727019	0.00860272	-0.448783	0.401238	0.834422	-0.271051	0.687518	1	-2.24007	1.80933e-06	1.78722e-05	-0.74316	0.0985276	0.215909	1.4165	0.08204	0.211455
Zm00001eb016110	19.535	9.67	6.975	13.37	10.94	6.97	7.46	8.35	8.865	3.04	7.355	7.25	-0.547062	0.0356805	0.075231	0.178025	0.474243	0.815066	-0.00103456	0.797157	0.989774	-1.2951	0.0164496	0.103799	-0.183051	0.725987	1	-0.29014	0.486798	0.940973	-2.13686	1.43958e-06	1.44873e-05	-0.572815	0.16209	0.315911	0.0568223	0.911343	1
Zm00001eb016160	6.9	39.215	21.79	13.44	22.615	7.135	13.285	24.44	28.185	10.08	24.07	17.795	0.961865	0.00430994	0.0123017	-0.794126	0.00485751	0.0357073	-1.61068	0.000148909	0.00245158	-0.398303	0.494229	0.847525	-0.0220081	0.906644	1	-0.663456	0.0265573	0.20643	-0.415037	0.357118	0.583041	0.0899561	0.563712	0.747625	1.31849	0.00627994	0.027627
Zm00001eb016180	509.66	435.01	326.85	381.92	149.73	176.355	1098.82	1007.1	385.865	625.52	225.17	258.27	-0.416265	0.0324174	0.069447	-1.53869	8.26423e-08	2.38378e-06	-0.890146	0.0271149	0.143677	-0.812827	0.00363513	0.0325384	-2.16111	3.15698e-11	2.84849e-09	-0.579216	0.00566156	0.0674037	0.711786	0.000338079	0.00199719	0.588651	0.00656589	0.022985	0.550398	0.2311	0.446215
Zm00001eb016230	173.415	295.29	215.765	19.065	39.015	79.29	67.585	54.975	75.73	7.835	13.27	16.01	-3.18523	2.95269e-32	3.56295e-30	-2.92003	2.81078e-19	4.6838e-17	-1.44425	0.000166712	0.00269668	-3.1087	1.81091e-17	2.7044e-15	-2.05061	9.70852e-09	5.40939e-07	-2.24189	5.30653e-08	3.95763e-06	-1.28292	0.00126606	0.00636693	-1.55586	7.26581e-06	5.33435e-05	-2.30817	1.58177e-12	4.93015e-11
Zm00001eb016250	17.505	24.605	23.365	247.21	322.25	106.595	39.3	105.125	41.63	378.01	859.455	267.645	3.8199	2.40788e-48	1.08707e-45	3.71116	1.12574e-42	2.10368e-39	2.18972	1.05622e-13	2.21431e-11	3.26582	3.38791e-39	3.8276e-36	3.03132	6.21223e-26	3.52152e-23	2.68463	2.90809e-18	1.19804e-15	0.612687	0.00336143	0.0147838	1.41524	2.43814e-12	4.45469e-11	1.32818	0.000597913	0.0038313
Zm00001eb016260	0.64	3.62	2.39	20.495	25.005	6.795	2.33	5.11	3.34	26.095	46.075	22.725	5.00106	1.79719e-23	9.70298e-22	2.78816	6.2215e-14	4.90261e-12	1.50746	0.00184006	0.0191797	3.48537	3.624e-16	4.68505e-14	3.17259	2.78286e-16	5.66921e-14	2.76636	1.20958e-12	2.18009e-10	0.348501	0.143553	0.308078	0.881768	0.000393203	0.00193816	1.74173	5.49681e-05	0.00047737
Zm00001eb016290	7.24	11.635	9.815	102.855	135.285	49	8.82	25.155	9.37	88.52	209.86	58.38	3.82848	2.51095e-42	7.30546e-40	3.53946	4.04445e-36	3.77896e-33	2.31972	1.74955e-12	2.80749e-10	3.32715	2.08921e-30	1.18017e-27	3.06051	1.0578e-24	5.40848e-22	2.63935	5.86688e-13	1.13634e-10	-0.216537	0.635684	0.824282	0.633425	0.00116787	0.00510883	0.252692	0.809171	0.950172
Zm00001eb016300	0.525	3.18	2.01	17.195	21.775	5.585	2.34	4.94	3.46	23.98	41.545	19.845	5.03353	6.14202e-20	2.38618e-18	2.77557	4.52514e-13	3.16542e-11	1.47436	0.00529069	0.0431014	3.35725	1.6944e-15	1.95684e-13	3.07209	4.08731e-14	5.98768e-12	2.51993	1.64263e-10	2.10014e-08	0.479843	0.0605824	0.160654	0.932002	0.000500205	0.00240971	1.82915	4.40379e-05	0.000392565
Zm00001eb016330	12.805	11.08	15.435	10.52	11.2	13.405	31.57	33.065	28.025	20.835	25.945	29.475	-0.283573	0.301213	0.429006	0.0155409	0.799619	0.995935	-0.203434	1	1	-0.599545	0.073235	0.293501	-0.349848	0.141747	0.502543	0.0727774	0.840013	1	0.985874	0.000302843	0.00181817	1.21196	1.30385e-06	1.09375e-05	1.13672	0.0035697	0.0173359
Zm00001eb016340	2.28	3.9	2.295	3.15	2.53	2.255	0.001	0.001	0.375	0.001	0.001	0.001	0.466318	0.556831	0.683765	-0.624337	0.480367	0.820323	-0.0253667	0.814702	0.995534	0	1	1	0	1	1	-8.55075	0.504041	0.944807	-11.6211	0.000155793	0.00101493	-11.3049	0.000265681	0.00137433	-11.1389	0.00298026	0.014979
Zm00001eb016370	2.22	4.355	3.92	62.94	39.94	6.715	4.885	7.155	5.445	51.745	33.345	26.48	4.82535	1.69846e-36	2.98485e-34	3.19709	3.07823e-22	7.32114e-20	0.776534	0.0508246	0.219766	3.40499	2.29695e-28	1.06583e-25	2.22045	6.94342e-12	7.33023e-10	2.2819	1.82864e-11	2.60771e-09	-0.282558	0.48915	0.709367	-0.260364	0.363182	0.559328	1.97944	6.83756e-07	8.89117e-06
Zm00001eb016380	0.55	0.81	0.001	7.195	5.105	0.76	0.001	1.975	0.001	6.615	4.13	3.455	3.70949	1.40848e-08	1.23886e-07	2.65592	0.000279793	0.00327221	9.56986	0.250077	0.576127	12.6915	1.22578e-09	5.97595e-08	1.06429	0.151958	0.520524	11.7545	0.000176833	0.00424456	-0.121254	1	1	-0.305769	0.677116	0.835017	2.18461	0.0340208	0.108193
Zm00001eb016390	1.585	2.375	0.001	0.465	0.58	0.001	1.395	9.73	0.001	0.75	1.52	0.001	-1.76918	0.170704	0.274462	-2.0338	0.0896381	0.314738	0	1	1	-0.895303	0.522299	0.860339	-2.67837	1.27151e-05	0.000331228	0	1	1	0.68966	0.712	0.877213	1.38995	0.228895	0.406472	0	1	1
Zm00001eb016420	169.255	104.695	89	78.275	69.285	69.91	231.51	332.585	178.65	241.315	272.85	181.93	-1.11257	1.24324e-08	1.10541e-07	-0.595578	0.0294883	0.14353	-0.348307	0.629582	0.899007	0.0598431	0.36792	0.742037	-0.285615	0.230318	0.652292	0.0262475	0.924437	1	1.62429	5.33861e-14	1.42375e-12	1.97749	2.44287e-22	1.06394e-20	1.37981	0.00019773	0.00147222
Zm00001eb016430	0.415	3.575	1.03	3.005	3.965	2.685	0.44	0.765	0.001	0.001	0.915	0.001	2.85618	0.00166381	0.00532278	0.149378	0.752588	0.978443	1.38228	0.119638	0.377983	-8.78136	0.501839	0.84991	0.258312	1	1	0	1	1	-11.5531	0.000184501	0.00117589	-2.11548	0.009086	0.0303376	-11.3907	0.00159816	0.00889766
Zm00001eb016440	48.4	11.04	14.91	11.92	8.975	9.335	10.305	8.83	9.645	7.29	9.57	14.34	-2.02162	4.83364e-17	1.35513e-15	-0.298756	0.585961	0.88928	-0.675558	0.17172	0.468709	-0.499354	0.357964	0.731899	0.116105	0.913803	1	0.572192	0.100262	0.471134	-0.709394	0.093545	0.223574	0.092607	0.707478	0.856797	0.619323	0.260265	0.482803
Zm00001eb016450	16.105	42.28	31.72	58.835	62.74	36.21	42.935	45.37	42.64	66.77	62.915	62.285	1.86917	6.56433e-16	1.59302e-14	0.56941	0.00819032	0.0534485	0.190995	0.19297	0.500494	0.637046	0.000796605	0.0092658	0.471665	0.0694776	0.324561	0.546677	0.0116908	0.115986	0.182525	0.225495	0.428392	0.00401849	0.789223	0.915796	0.782497	0.0302046	0.0984675
Zm00001eb016500	0.795	3.185	1.505	1.39	5.14	0.885	0.001	0.001	0.001	0.001	0.001	0.001	0.806058	0.591829	0.715122	0.690475	0.23308	0.572728	-0.766014	1	1	0	1	1	0	1	1	0	1	1	-10.4409	0.0179669	0.0606277	-12.3276	3.32244e-06	2.59678e-05	-9.78953	0.138406	0.310945
Zm00001eb016550	60.255	11.03	48.005	79.945	40.74	76.125	58.99	31.375	86.555	73.77	23.73	49.8	0.407927	0.0928718	0.167934	1.88501	2.21504e-12	1.39638e-10	0.665186	0.00270125	0.025694	0.322564	0.183468	0.51534	-0.402903	0.0883047	0.38079	-0.797471	0.00203435	0.0308949	-0.115974	0.951192	1	-0.779734	0.00136809	0.00586926	-0.612225	0.0110396	0.0440096
Zm00001eb016590	1.475	5.605	4.505	5.93	5.775	6.375	3.065	2.93	5.335	2.34	3.95	6.035	2.00732	0.000135391	0.000567599	0.0431066	0.89968	1	0.500898	0.191784	0.499001	-0.389379	0.839823	1	0.430952	0.575671	0.950196	0.177865	0.779174	1	-1.34152	0.0195107	0.0648434	-0.547968	0.291657	0.481808	-0.0790716	0.720581	0.894568
Zm00001eb016600	33.635	29.965	20.01	21.28	18.485	16.72	15.13	10.5	14.875	9.47	9.775	18.535	-0.660465	0.0170993	0.0403163	-0.696923	0.0221813	0.116434	-0.259146	0.852733	1	-0.675976	0.12076	0.402095	-0.103221	0.847921	1	0.317362	0.344812	0.836816	-1.16806	0.00037347	0.00218264	-0.919186	0.00317272	0.0122381	0.148677	1	1
Zm00001eb016620	59.745	15.17	10.99	17.015	13.745	17.985	19.675	19.98	19.585	15.22	13.355	23.3	-1.81201	1.3839e-07	1.03981e-06	-0.142314	0.941635	1	0.710603	0.00821444	0.0592627	-0.370395	0.471391	0.829252	-0.581177	0.0885394	0.381486	0.250581	0.465326	0.927941	-0.160839	0.851025	0.961709	-0.0415269	1	1	0.373536	0.547832	0.76869
Zm00001eb016630	0.001	0.001	0.001	0.001	0.001	0.001	2.26	0.84	4.765	1.95	0.66	2.675	0	1	1	0	1	1	0	1	1	-0.212849	1	1	-0.347923	1	1	-0.832937	0.246404	0.735076	10.9293	0.00259635	0.0117991	9.36632	0.256586	0.440244	11.3853	0.00436193	0.0205207
Zm00001eb016690	2.135	0.65	5.17	10.835	58.73	40.75	7.1	15.035	16.77	11.215	21.91	44.76	2.34339	6.89662e-08	5.45583e-07	6.49751	4.47038e-38	4.67816e-35	2.97856	1.47896e-05	0.000358314	0.659539	0.109373	0.377365	0.543265	0.328555	0.765507	1.41633	0.0364127	0.253298	0.0497305	0.745105	0.900553	-1.42251	1.98301e-07	1.93215e-06	0.13541	1	1
Zm00001eb016710	2.28	2.305	2.315	4.665	3.64	4.2	0.001	0.001	0.001	0.545	0.001	0.255	1.03284	0.0598125	0.11635	0.659172	0.267943	0.616312	0.859377	0.0759083	0.283837	9.09011	0.250057	0.60841	0	1	1	7.99435	1	1	-3.09755	0.000191205	0.00121428	-11.8297	8.97967e-06	6.43619e-05	-4.04182	0.00020151	0.00149534
Zm00001eb016730	3.99	2.515	5.425	14.57	14.085	21.285	0.345	0.001	0.001	0.265	0.29	0.67	1.86854	0.000242712	0.000955988	2.48553	1.65859e-08	5.44443e-07	1.97214	3.43578e-05	0.000733908	-0.380604	1	1	8.17991	1	1	9.38802	0.260884	0.751426	-5.78086	1.54628e-09	2.47377e-08	-5.60196	2.71036e-16	7.4306e-15	-4.98953	6.63704e-12	1.91196e-10
Zm00001eb016740	11.465	10.6	12.015	21.12	17.77	26.715	13.635	15.135	11.785	19.735	16.425	18.685	0.881373	0.00188141	0.00594627	0.745379	0.00740531	0.0494755	1.15281	2.31808e-05	0.000524463	0.533442	0.0320409	0.167555	0.118005	0.817464	1	0.664929	0.0379801	0.261191	-0.0978533	1	1	-0.11355	0.894914	0.979073	-0.515769	0.0399167	0.122197
Zm00001eb016750	81.765	71.59	93.82	32.195	23.02	37.125	86.755	43.465	83.575	22.63	29.97	42.67	-1.34465	4.65713e-10	5.17057e-09	-1.63687	4.68191e-10	2.07607e-08	-1.3375	3.36424e-05	0.000720995	-1.93871	2.36966e-14	2.39594e-12	-0.536335	0.0190369	0.135187	-0.969849	3.73232e-05	0.00116289	-0.5086	0.106792	0.247622	0.380631	0.0643429	0.153987	0.200831	0.893947	0.997865
Zm00001eb016770	13.66	18.17	19.655	6.95	6.575	8.18	12.145	14.76	14.745	6.265	5.995	11.23	-0.974873	0.00438351	0.0124818	-1.4665	3.76508e-05	0.000579765	-1.26472	0.00190423	0.0196634	-0.954976	0.0337159	0.173247	-1.29986	0.000392479	0.00631441	-0.392868	0.252041	0.741114	-0.149698	0.915575	0.997372	-0.133231	1	1	0.457185	0.519701	0.744412
Zm00001eb016780	49.135	14.95	17.56	8.975	8.415	7.31	15.825	7.85	14.69	6.775	9.845	12.78	-2.45277	2.2167e-21	1.00076e-19	-0.82911	0.0275955	0.136785	-1.26435	0.00470051	0.0391774	-1.22391	0.00443793	0.0381095	0.326699	0.509682	0.903137	-0.200947	0.580429	0.982355	-0.405691	0.512874	0.728721	0.226428	0.457744	0.653115	0.805945	0.1502	0.32819
Zm00001eb016820	0.001	0.001	0.001	0.001	0.001	0.001	5.05	0.001	0.001	0.001	8.295	16.195	0	1	1	0	1	1	0	1	1	-12.3021	0.00293285	0.0272625	13.018	0.000392532	0.00631441	13.9833	5.95298e-17	1.9313e-14	0	1	1	13.018	0.000237171	0.00124196	13.9833	2.55597e-14	9.91759e-13
Zm00001eb016850	130.595	287.435	147.015	517.465	402.74	265.51	21.735	72.985	22.495	168.235	137.325	41	1.98636	3.05532e-19	1.09145e-17	0.486613	0.0105994	0.0656337	0.852803	0.00138706	0.0153897	2.95239	4.32036e-28	1.90279e-25	0.911922	0.00367749	0.0386358	0.86602	0.000529589	0.0105893	-1.62098	4.90475e-10	8.41008e-09	-1.55225	6.76274e-10	9.17165e-09	-2.69507	2.68025e-17	1.43837e-15
Zm00001eb016860	0.001	0.001	0.001	0.001	0.001	0.001	2.57	3.01	4.735	2.335	2.605	2.95	0	1	1	0	1	1	0	1	1	-0.138346	1	1	-0.20848	0.831951	1	-0.682649	0.304687	0.79676	11.1892	0.00125109	0.00629999	11.3471	0.000272703	0.00140414	11.5265	0.00175755	0.00959839
Zm00001eb016870	7.5	22.64	28.385	16.025	10.545	18.685	14.315	63.51	72.38	47.62	48.66	65.63	1.09536	0.00236723	0.00726254	-1.10231	0.000617924	0.00643556	-0.603248	0.197495	0.507271	1.73404	1.40916e-09	6.80616e-08	-0.384247	0.113086	0.443036	-0.141236	0.535797	0.958709	1.57124	1.82648e-08	2.53142e-07	2.20618	1.5053e-18	4.92902e-17	1.81247	1.73631e-07	2.49553e-06
Zm00001eb016880	10.215	27.71	38.19	20.035	15.26	30.78	24.035	141.54	169.575	108.29	103.275	137.585	0.971833	0.00119857	0.00398281	-0.860652	0.00437857	0.0328136	-0.311202	0.690303	0.936385	2.17169	5.80484e-17	8.05441e-15	-0.454719	0.0979879	0.404229	-0.3016	0.136148	0.554462	2.43431	3.45901e-22	1.72621e-20	2.75866	2.75454e-29	1.88215e-27	2.16026	9.42499e-12	2.66321e-10
Zm00001eb016910	12.43	10.345	16.665	29.91	17.44	17.315	6.395	2.435	3.935	10.64	3.97	5.5	1.2668	4.68698e-06	2.64672e-05	0.753466	0.019364	0.105039	0.0552011	0.505589	0.81758	0.734482	0.0268814	0.148575	0.705217	0.337619	0.775114	0.483068	0.516601	0.949567	-1.49113	1.093e-06	1.12709e-05	-2.13519	6.90765e-09	8.24883e-08	-1.65452	0.000196728	0.00146763
Zm00001eb016920	10.545	23.16	33.09	15.275	11.545	24.71	14.01	69.825	79.47	50.515	52.91	71.195	0.534613	0.120703	0.208113	-1.00437	0.00203862	0.0175327	-0.4213	0.42941	0.761006	1.85025	4.48135e-13	3.81796e-11	-0.400203	0.121717	0.465015	-0.158634	0.510386	0.945422	1.72554	4.4397e-12	9.79847e-11	2.19627	3.973e-17	1.17458e-15	1.52668	7.01455e-06	7.49263e-05
Zm00001eb016960	142.175	92.22	103.35	65.72	65.76	67.055	56.75	39.345	54.01	33.775	41.37	52.175	-1.11326	2.00919e-08	1.74092e-07	-0.487869	0.0768339	0.283276	-0.624122	0.104428	0.34889	-0.748665	0.00741991	0.0570264	0.0724046	0.873963	1	-0.0498679	0.829273	1	-0.960377	0.000165502	0.00106958	-0.668625	0.00282995	0.0110673	-0.361986	0.0778058	0.20295
Zm00001eb016970	151.665	93.355	109.81	62.38	62.905	56.13	71.84	42.105	76.17	35.65	57.56	86.41	-1.28173	3.59781e-10	4.07124e-09	-0.569553	0.0382972	0.174318	-0.968165	0.00319933	0.0292954	-1.01089	0.000193257	0.00281806	0.451075	0.0888923	0.382501	0.181975	0.431736	0.907311	-0.807181	0.00282242	0.0126928	-0.128108	0.779537	0.90881	0.622426	0.0906118	0.227067
Zm00001eb016980	0.905	2.57	2.06	2.81	3.265	3.17	6.775	5.885	5.515	8.79	6.61	4.765	1.63458	0.0233035	0.0524949	0.345315	0.572403	0.880809	0.621839	0.263672	0.591723	0.375642	0.225459	0.578738	0.167608	0.891957	1	-0.210885	0.77469	1	1.64529	0.000159551	0.00103714	1.01757	0.022783	0.0660795	0.587993	0.63242	0.833201
Zm00001eb016990	138.215	63.355	99.04	46.81	53.195	50.605	50.025	43.24	67.155	31.45	42.875	60.04	-1.56203	2.48612e-14	4.9656e-13	-0.252168	0.496702	0.832292	-0.968731	0.00292805	0.0273116	-0.669589	0.0213965	0.125477	-0.0122299	0.909557	1	-0.161571	0.479548	0.936789	-0.573757	0.0407011	0.116953	-0.311154	0.220938	0.396823	0.246644	0.759585	0.920325
Zm00001eb017060	11.295	5.895	7.08	5.445	6.705	7.075	6.065	7.495	6.96	5.965	5.56	6.135	-1.05268	0.00243413	0.00743298	0.185746	0.556484	0.870218	-0.00101921	0.705169	0.945006	-0.0239855	0.900178	1	-0.430844	0.336801	0.773882	-0.182024	0.795357	1	0.13159	0.635982	0.824459	-0.270152	0.724731	0.870412	-0.205667	0.565443	0.782798
Zm00001eb017100	6.055	10.765	7.38	11.55	10.66	1.815	7.68	3.935	5.96	3.755	3.445	5.55	0.931694	0.0111633	0.028026	-0.0141409	0.931413	1	-2.02365	0.0012554	0.0142079	-1.03229	0.0756418	0.29981	-0.19186	0.866918	1	-0.102825	0.905116	1	-1.62101	0.00072125	0.00391889	-1.62963	0.000169407	0.000920397	1.61252	0.0594964	0.166545
Zm00001eb017120	1.02	0.475	0.495	21.765	1.425	0.001	0.001	1.375	0.56	3.47	0.001	0.001	4.41537	5.77608e-16	1.41882e-14	1.58496	0.186163	0.501897	-8.95128	0.501068	0.815753	11.7607	2.77007e-05	0.000519337	-10.4252	0.0625469	0.30505	-9.12928	0.505926	0.944807	-2.649	8.12334e-08	1.01871e-06	-10.4767	0.0160551	0.0492708	0	1	1
Zm00001eb017140	15.07	14.91	10.205	17.07	12.69	11.57	8.1	3.66	6.655	7.315	5.895	7.31	0.179784	0.647724	0.763223	-0.232588	0.693282	0.94768	0.181113	0.34507	0.683321	-0.147064	1	1	0.687648	0.289469	0.717951	0.135433	0.905207	1	-1.22253	0.00236178	0.0109214	-1.10613	0.0052438	0.0189165	-0.662446	0.0631292	0.174566
Zm00001eb017170	1.03	0.8	0.55	0.355	1.2	0.82	0.28	9.875	2.98	0.37	8.675	5.665	-1.53675	0.194873	0.305335	0.584963	0.75602	0.979642	0.576192	1	1	0.402098	1	1	-0.186917	0.665547	0.99683	0.926764	0.105392	0.484404	0.0597062	1	1	2.85383	9.86813e-08	1.00348e-06	2.78838	0.00138964	0.00790881
Zm00001eb017180	6.895	7.335	6.71	3.415	4.48	5.05	7.8	9.925	5.795	4.435	5.375	4.23	-1.01366	0.0165186	0.0391156	-0.711298	0.221807	0.556421	-0.410029	0.672225	0.927817	-0.81454	0.158808	0.471076	-0.884802	0.0365874	0.214346	-0.454151	0.454519	0.92379	0.377049	0.372161	0.598253	0.262766	0.523338	0.712566	-0.255626	0.473198	0.708453
Zm00001eb017200	58.195	19.93	16.045	13.185	12.345	20.41	26.22	20.88	23.77	12.565	21.075	21.755	-2.142	3.6357e-18	1.15395e-16	-0.691015	0.0590638	0.236971	0.347152	0.0936639	0.324114	-1.06126	0.00188885	0.0188921	0.0134109	1	1	-0.127795	0.731305	1	-0.0694869	1	1	0.771606	0.00206364	0.00844016	0.0920708	0.88621	0.993771
Zm00001eb017210	13.87	14.91	13.075	11.38	14.99	6.99	14.53	14.565	11.875	11.655	13.795	16.96	-0.285467	0.325552	0.45608	0.00772013	0.784163	0.98988	-0.903447	0.0774256	0.286881	-0.318086	0.633249	0.925997	-0.0783602	0.81039	1	0.514209	0.130926	0.543894	0.0344484	0.764233	0.913619	-0.119855	0.889386	0.97604	1.27877	0.00706536	0.0304757
Zm00001eb017220	1.02	3.92	4.465	4.295	3.17	4.63	3.555	4.415	3.23	2.975	2.975	1.635	2.07409	0.00165202	0.00529054	-0.306371	0.750505	0.976838	0.052352	0.635872	0.902726	-0.25696	1	1	-0.569524	0.3663	0.80426	-0.982244	0.274984	0.768238	-0.529768	0.431634	0.656135	-0.0915932	1	1	-1.50172	0.0158246	0.0588131
Zm00001eb017260	7.235	4.51	4.615	3.025	7.71	8.06	5.485	10.06	9.8	6.74	14.005	7.55	-1.25806	0.00279958	0.00841988	0.773603	0.0737185	0.275104	0.804449	0.0398983	0.185811	0.297257	0.328663	0.701248	0.477312	0.266724	0.691669	-0.376305	0.381506	0.866886	1.15581	0.00793442	0.0306658	0.861139	0.00607233	0.0214631	-0.0943032	0.61907	0.823909
Zm00001eb017320	27.095	26.2	33.095	54.58	42.875	37.12	31.465	32.555	27.23	42.59	33.27	31.95	1.01035	3.91461e-06	2.23954e-05	0.71057	0.00127496	0.011824	0.165583	0.17257	0.469751	0.436767	0.0131415	0.0880107	0.0313427	1	1	0.230619	0.357914	0.848921	-0.357858	0.250076	0.460584	-0.365915	0.150028	0.297662	-0.216381	0.189148	0.388237
Zm00001eb017330	13.99	12.735	13.155	26.895	17.555	7.055	5.15	7.845	3.295	2.24	4.555	4.02	0.942942	0.00043777	0.00161724	0.463083	0.0794206	0.290314	-0.898893	0.0681005	0.263836	-1.20107	0.0620083	0.264448	-0.784322	0.237383	0.661171	0.286917	0.734157	1	-3.58577	3.52604e-19	1.47602e-17	-1.94636	5.78827e-08	6.10149e-07	-0.811451	0.0800509	0.207457
Zm00001eb017350	4.705	3.165	2.15	1.575	4.115	1.81	2.815	9.025	1.635	6.27	9.8	4.135	-1.57884	0.00586901	0.016024	0.378687	0.420398	0.7742	-0.248347	1	1	1.15533	0.0183957	0.112606	0.118855	0.915754	1	1.3386	0.0671395	0.372815	1.99311	0.000282204	0.0017125	1.25189	0.00211973	0.00862084	1.1919	0.183205	0.379292
Zm00001eb017390	0.001	0.001	0.001	0.001	0.001	0.001	2.08	6.065	0.28	3.615	1.775	0.605	0	1	1	0	1	1	0	1	1	0.797412	0.176194	0.503951	-1.77269	0.0125302	0.0993216	1.11151	1	1	11.8198	1.12718e-05	9.62365e-05	10.7936	0.0057823	0.0205492	9.24079	0.517588	0.742685
Zm00001eb017400	151.295	83.445	75.945	182.2	202.815	217.465	49.385	73.155	36.875	98.685	97.57	84.205	0.268159	0.374422	0.507913	1.28127	1.50196e-09	6.02675e-08	1.51776	1.24305e-08	8.07856e-07	0.998758	0.00023047	0.00327357	0.415481	0.0896521	0.384249	1.19126	5.31575e-06	0.000221993	-0.88462	0.00431032	0.0182952	-1.05565	7.71776e-08	7.99073e-07	-1.36881	2.49647e-06	2.91835e-05
Zm00001eb017440	3.1	18.57	18.755	17.335	23.13	22.19	15.015	18.29	15.575	18.92	20.605	17.235	2.48335	2.68199e-11	3.55404e-10	0.316791	0.197149	0.519	0.242634	0.19087	0.497379	0.333508	0.152203	0.45795	0.171939	0.627083	0.976851	0.146109	0.711984	1	0.126224	0.517915	0.732788	-0.166771	0.709187	0.857979	-0.364568	0.152725	0.332073
Zm00001eb017520	107.175	55.22	28.72	34.32	34.57	37.225	31.835	31.305	35.88	21.15	35.915	32.81	-1.64285	2.32753e-08	1.99041e-07	-0.67567	0.118427	0.378949	0.374216	0.287693	0.621032	-0.589956	0.0794444	0.30843	0.198193	0.523411	0.913589	-0.129044	0.646992	1	-0.698392	0.03699	0.108587	0.0550659	0.772347	0.904382	-0.182136	0.49038	0.723394
Zm00001eb017550	2.175	3.94	2.01	2.3	2.515	2.66	2.75	5.245	6.385	1.445	1.885	1.115	0.0806185	1	1	-0.647637	0.505989	0.836294	0.404231	0.496941	0.815753	-0.928362	0.359636	0.732811	-1.47638	0.0212446	0.146322	-2.51764	0.000125816	0.00322353	-0.670564	0.689074	0.861794	-0.415994	0.7081	0.857319	-1.25438	0.167013	0.354849
Zm00001eb017600	250.22	78.925	75.82	61.37	64.355	60.225	103.585	90.48	94.7	72.945	61.86	56.24	-2.02759	3.14705e-20	1.26778e-18	-0.29443	0.378344	0.734726	-0.332216	0.600742	0.884709	-0.505934	0.0962972	0.348585	-0.548592	0.0215718	0.147756	-0.751768	0.000801073	0.014872	0.249276	0.142469	0.306438	-0.0570454	1	1	-0.0987659	0.37337	0.611793
Zm00001eb017610	4.405	5.7	4.175	0.405	1.475	1.74	2.35	3.69	4.53	2.705	2.845	3.455	-3.44315	2.22089e-05	0.000109911	-1.95025	0.00917552	0.0582645	-1.26269	0.093526	0.323785	0.202968	0.678366	0.949458	-0.375192	0.690317	1	-0.390825	0.614542	0.996173	2.73963	0.00558096	0.0226912	0.947714	0.144956	0.290552	0.989598	0.41787	0.656177
Zm00001eb017620	2.88	3.625	1.335	2.71	0.875	1.44	6.945	2.69	4.86	4.85	3.205	2.015	-0.087776	0.888958	0.952273	-2.05063	0.0205896	0.109786	0.109229	1	1	-0.51799	0.43922	0.804989	0.252718	0.851724	1	-1.27018	0.0700888	0.38179	0.839692	0.0902828	0.217605	1.87297	0.0111361	0.0360852	0.484711	0.806813	0.948963
Zm00001eb017660	16.82	21.06	32.47	35.855	23.355	42.34	20.94	17.745	17.37	47.63	24.785	20.025	1.092	5.38662e-06	3.01e-05	0.149226	0.39855	0.753243	0.382914	0.0878693	0.31154	1.18561	6.44342e-06	0.000140228	0.482055	0.142292	0.503045	0.205204	0.587576	0.983996	0.409696	0.0673665	0.174711	0.0857358	0.581182	0.762216	-1.08022	0.00184401	0.00997574
Zm00001eb017670	3.73	3.605	3.885	4.63	4.635	6.43	1.675	0.64	0.92	2.64	1.255	1.075	0.311837	0.603439	0.725152	0.36257	0.449531	0.79771	0.726904	0.0745024	0.280365	0.656377	0.388472	0.758241	0.971544	0.726645	1	0.224631	1	1	-0.810474	0.277227	0.493842	-1.88488	0.00333089	0.0127655	-2.58048	0.000220811	0.00162005
Zm00001eb017690	7.615	3.735	3.835	2.225	2.95	4.035	1.875	2.2	1.815	1.405	1.47	2.435	-1.77504	0.000168075	0.000689386	-0.340393	0.731125	0.968365	0.0733421	0.721629	0.955338	-0.41632	1	1	-0.581687	0.607445	0.966486	0.423952	0.635936	1	-0.663235	0.499823	0.718596	-1.0049	0.215283	0.38967	-0.728647	0.215671	0.425145
Zm00001eb017700	16.37	5.4	7.295	4.71	4.715	3.805	6.42	5.315	7.39	4.72	4.425	6.585	-1.79726	1.30845e-07	9.88509e-07	-0.195702	0.892093	1	-0.939012	0.144308	0.420459	-0.443786	0.594993	0.907465	-0.264392	0.637213	0.981452	-0.166391	0.712263	1	0.0030598	1	1	-0.0915803	1	1	0.791287	0.273757	0.498792
Zm00001eb017710	53.455	59.055	61.295	46.25	51.4	45.61	1.56	0.001	1.7	0.925	1.975	2.51	-0.208872	0.228581	0.346598	-0.200291	0.639373	0.918287	-0.426419	0.406617	0.740692	-0.754021	0.549	0.877462	10.9476	0.00782892	0.0695323	0.562153	0.706986	1	-5.64386	2.38103e-38	3.15297e-36	-4.70184	9.31505e-43	1.33424e-40	-4.18359	8.52178e-23	7.7154e-21
Zm00001eb017720	4.435	21.69	0.001	0.001	0.001	0.001	0.001	0.001	0.001	0.001	0.21	0.001	-12.1147	0.00138078	0.00451551	-14.4047	4.60506e-22	1.06617e-19	0	1	1	0	1	1	7.71425	1	1	0	1	1	0	1	1	7.71425	1	1	0	1	1
Zm00001eb017730	1.59	2.63	1.235	2.13	2.66	1.1	2.59	7.58	2.385	3.78	14.47	4.66	0.421827	0.698274	0.804874	0.0163634	1	1	-0.167008	1	1	0.545434	0.269475	0.630904	0.932795	0.0161053	0.118902	0.966341	0.144961	0.572478	0.827533	0.155837	0.32717	2.44357	9.30021e-10	1.24553e-08	2.08283	0.0178857	0.0650118
Zm00001eb017760	18.42	20.74	9.51	8.725	10.305	6.205	19.445	16.635	10.57	9.995	8.735	7.605	-1.07805	0.00156079	0.00503006	-1.00907	0.0549219	0.22444	-0.616014	0.36926	0.706505	-0.960121	0.0148153	0.0964996	-0.929342	0.00448168	0.044896	-0.474955	0.308919	0.79969	0.196051	0.439926	0.664084	-0.238465	0.693657	0.846374	0.293517	0.917106	1
Zm00001eb017790	0.001	0.001	0.001	0.001	0.001	0.001	30.955	45.19	9.315	29.76	11.895	9.065	0	1	1	0	1	1	0	1	1	-0.0567979	0.837326	1	-1.92565	9.72169e-12	9.71275e-10	-0.0392487	1	1	14.8611	1.56845e-24	9.80245e-23	13.5381	1.04436e-14	2.43881e-13	13.1461	3.15635e-08	5.1731e-07
Zm00001eb017810	17.28	15.595	12.305	10.52	11.135	6.7	9.17	2.735	6.715	5.85	4.01	4.6	-0.715969	0.0147086	0.0354842	-0.485982	0.23722	0.578877	-0.877012	0.0934541	0.323785	-0.648485	0.325446	0.69752	0.552061	0.450176	0.875314	-0.545754	0.351956	0.844032	-0.846626	0.0896335	0.21643	-1.47343	0.000618125	0.00289753	-0.542527	0.242828	0.461257
Zm00001eb017830	10.85	1.42	1.095	1.51	0.605	0.31	4.23	3.4	6.265	0.935	3.58	2.3	-2.84507	7.29368e-09	6.73193e-08	-1.23088	0.517357	0.843726	-1.82059	0.375129	0.710367	-2.17762	0.00816964	0.0609673	0.0744248	1	1	-1.44568	0.0139196	0.131132	-0.69151	0.804842	0.937743	2.56495	0.00191751	0.00792111	2.89129	0.0288333	0.0949516
Zm00001eb017860	18.215	10.075	10.275	6.44	7.37	8.295	12.31	8.97	11.815	7.235	9.09	9.335	-1.49999	1.26661e-06	7.91367e-06	-0.451043	0.385429	0.740321	-0.308825	0.832505	1	-0.766766	0.106724	0.371898	0.0191723	1	1	-0.339898	0.376375	0.864538	0.167932	0.601095	0.797554	0.302616	0.379947	0.576836	0.170408	1	1
Zm00001eb017930	181.675	516.255	273.735	140.74	178.5	55.535	148.755	48.45	105.83	118.33	49.315	15.875	-0.368327	0.151786	0.249922	-1.53216	1.08462e-06	2.40678e-05	-2.30131	4.58954e-12	6.70279e-10	-0.330122	0.646348	0.932535	0.0255299	1	1	-2.73692	2.07826e-05	0.000705086	-0.250217	0.720888	0.884057	-1.85583	1.58074e-12	2.9526e-11	-1.80664	0.000110096	0.000881632
Zm00001eb017940	3.705	4.055	3.055	0.715	1.535	0.001	12.635	3.575	8.68	5.415	3.11	1.885	-2.37346	0.00698021	0.0186869	-1.40146	0.0533579	0.220425	-11.577	0.00155766	0.016809	-1.22239	0.0329314	0.17009	-0.201029	0.845903	1	-2.20313	0.00452962	0.0569031	2.92095	0.00116033	0.00594122	1.01868	0.175413	0.335496	10.8803	0.057972	0.163222
Zm00001eb017950	5.865	6.05	5.315	1.42	2.76	0.535	47.82	13.285	32.8	19.05	12.995	7.615	-2.04624	0.000952508	0.00324927	-1.13227	0.0552873	0.225616	-3.31246	0.000733927	0.00925724	-1.32782	0.00574281	0.0467356	-0.0318416	0.891122	1	-2.10678	0.000266798	0.00602652	3.74583	7.37907e-09	1.08631e-07	2.23522	2.77723e-05	0.000179508	3.83123	0.00103469	0.00614076
Zm00001eb017960	15.855	17.49	17.805	3.22	9.46	1.245	60.805	15.255	38.545	21.99	16.16	9.105	-2.29981	1.44182e-05	7.40321e-05	-0.886618	0.0242349	0.123956	-3.83806	2.02742e-08	1.2172e-06	-1.46734	0.00124713	0.0135423	0.083145	0.956668	1	-2.08181	0.00102369	0.0181551	2.77172	1.39281e-06	1.40643e-05	0.772515	0.0907068	0.202212	2.87051	0.00641746	0.0281316
Zm00001eb018010	9.015	12.94	12.56	7.765	10.485	10.635	3.2	4.11	4.305	2.725	2.92	3.635	-0.215342	0.490981	0.624445	-0.303511	0.556477	0.870218	-0.240016	1	1	-0.231816	1	1	-0.49317	0.442534	0.871991	-0.244058	0.865167	1	-1.51073	0.00340574	0.0149516	-1.84429	2.99305e-05	0.000192344	-1.54879	0.000719934	0.00449735
Zm00001eb018030	4.135	2.665	3.405	1.255	1.4	2.175	0.395	0.55	0.69	0.001	0.001	0.45	-1.7202	0.00493483	0.0138305	-0.928709	0.37047	0.726936	-0.646639	0.663971	0.921105	-8.62571	0.500148	0.84991	-9.10329	0.500038	0.902459	-0.616671	1	1	-10.2935	0.0348006	0.103726	-10.4512	0.0159226	0.0489933	-2.27302	0.0850591	0.217074
Zm00001eb018130	3.43	16.58	8.1	7.855	26.175	6.485	0.001	0.001	0.001	0.001	0.375	0.001	1.1954	0.0045498	0.0128936	0.658746	0.00790963	0.0520714	-0.320815	0.825903	1	0	1	1	8.55075	0.500038	0.902459	0	1	1	-12.9394	7.43725e-11	1.43742e-09	-6.12516	1.40585e-27	8.5194e-26	-12.6629	1.62073e-07	2.34588e-06
Zm00001eb018170	0.925	1.9	2.195	2.39	3.505	2.19	0.001	0.001	0.001	0.001	0.001	0.001	1.36949	0.0707646	0.133885	0.883415	0.122672	0.388308	-0.00329007	1	1	0	1	1	0	1	1	0	1	1	-11.2228	0.000627715	0.00347779	-11.7752	2.00944e-05	0.000133722	-11.0967	0.00695916	0.0300957
Zm00001eb018180	9.31	18.67	28.07	79.545	45.545	28.155	29.86	24.485	13.795	88.495	75.39	41.05	3.09492	3.06759e-30	3.03112e-28	1.28657	1.25681e-07	3.47575e-06	0.00436209	0.478054	0.802567	1.56738	1.32829e-12	1.0686e-10	1.62247	2.61963e-10	1.97426e-08	1.57324	1.83827e-06	8.78645e-05	0.153825	0.273673	0.489207	0.72708	0.000143146	0.000790552	0.543991	0.256521	0.478424
Zm00001eb018190	0.001	0.001	0.001	0.001	0.001	0.001	1.705	2.815	1.86	7.155	8.11	4.76	0	1	1	0	1	1	0	1	1	2.06918	5.8385e-05	0.0010034	1.52657	0.00774551	0.0693371	1.35566	0.0478599	0.302375	12.8047	1.98267e-10	3.59556e-09	12.9855	5.45583e-11	8.43245e-10	12.2167	7.10924e-05	0.000601888
Zm00001eb018220	110.695	135.73	145.845	61.63	53.065	56.235	0.001	0.001	0.001	0.001	0.57	0.001	-0.844885	1.77302e-05	8.94712e-05	-1.35491	2.07235e-07	5.40547e-06	-1.3749	4.9365e-06	0.000140251	0	1	1	9.15482	0.500038	0.902459	0	1	1	-15.9113	9.06065e-52	2.95565e-49	-6.54065	1.28366e-51	2.98981e-49	-15.7792	4.5189e-39	1.82249e-36
Zm00001eb018320	15.65	12.58	15.97	10.57	8.92	8.38	12.46	5.83	10	5.135	6.615	13.755	-0.566187	0.0555919	0.109457	-0.496016	0.25672	0.602409	-0.930342	0.0532628	0.226547	-1.27887	0.0062164	0.0497312	0.182245	0.782909	1	0.459956	0.215785	0.695538	-1.04154	0.0371863	0.109068	-0.431303	0.356729	0.552567	0.714934	0.231807	0.447215
Zm00001eb018410	6.205	11.32	11.925	8.225	9.87	10.02	36.135	33.06	26.975	20.865	11.08	17.44	0.406584	0.346564	0.478829	-0.197752	0.792916	0.994123	-0.251107	0.925148	1	-0.792312	0.124694	0.408229	-1.57713	0.000605	0.00895854	-0.629223	0.0345797	0.245482	1.343	3.51699e-06	3.29527e-05	0.166836	0.541901	0.728647	0.799518	0.0921739	0.230073
Zm00001eb018440	4.29	4.735	4.98	6.385	5.905	4.81	0.28	0.001	0.395	0.73	0.39	1.085	0.573709	0.230507	0.348872	0.318573	0.449046	0.79739	-0.0501088	0.879793	1	1.38247	0.625149	0.923844	8.60733	0.500038	0.902459	1.45777	0.690224	1	-3.12872	3.23844e-05	0.000248708	-3.92039	1.25548e-06	1.05682e-05	-2.14834	0.00461222	0.0214855
Zm00001eb018460	32.44	16.7	20.535	14.515	11.565	11.76	24.36	26.185	23.15	23.8	18.055	21.19	-1.16023	1.23932e-06	7.76351e-06	-0.530083	0.157228	0.452817	-0.804197	0.0612413	0.24973	-0.0335526	0.715186	0.966989	-0.536342	0.0557532	0.284559	-0.127629	0.67252	1	0.713417	0.00307078	0.0136582	0.642633	0.0180723	0.0543041	0.849496	0.0557938	0.158565
Zm00001eb018490	126.22	72.93	119	60.98	55.55	88.11	91.665	84.465	98.685	62.43	64.64	81.795	-1.04953	1.73427e-07	1.28282e-06	-0.392725	0.207208	0.534086	-0.433584	0.352918	0.690588	-0.554132	0.0656114	0.272568	-0.385926	0.0917891	0.389883	-0.270818	0.228518	0.709698	0.0339033	0.573193	0.776636	0.21864	0.180633	0.342921	-0.107293	0.338756	0.575308
Zm00001eb018500	2.63	4.21	6.695	7.06	4.71	8.115	6.08	5.775	4.41	5.305	6.99	4.07	1.42461	0.00599073	0.0163115	0.161907	0.787709	0.991486	0.277507	0.323056	0.660493	-0.196719	1	1	0.275472	0.709845	1	-0.11575	0.870338	1	-0.412315	0.528706	0.741174	0.569565	0.171632	0.329847	-0.995562	0.0287338	0.0946932
Zm00001eb018600	3.775	6.625	2.67	8.79	12.18	8.985	3.94	1.8	3.14	1.49	1.605	2.45	1.21939	0.00894808	0.0231825	0.878522	0.0132875	0.0788095	1.75068	0.00025962	0.00389583	-1.40288	0.0698419	0.285085	-0.165424	1	1	-0.357983	0.694816	1	-2.56055	7.03126e-06	6.25471e-05	-2.92387	1.6451e-09	2.14361e-08	-1.87474	0.000396817	0.00269313
Zm00001eb018630	0.001	0.29	2.74	12.465	5.33	4.47	2.11	0.001	0.89	3.34	0.68	1.015	13.6056	2.28608e-15	5.18727e-14	4.20001	4.50656e-05	0.000682296	0.706099	0.248374	0.576127	0.662605	0.229969	0.584311	9.40939	0.250056	0.673115	0.189602	1	1	-1.89996	0.000238451	0.00147715	-2.97053	0.000943954	0.00424867	-2.1388	0.00489662	0.0225772
Zm00001eb018640	56.925	31.14	131.285	213.125	155.56	214.145	53.805	18.875	33.155	84.955	20.39	38.445	1.90457	1.10091e-14	2.30434e-13	2.32063	3.16032e-19	5.20001e-17	0.705886	0.0139602	0.0886876	0.658959	0.00236938	0.0229476	0.111385	0.869027	1	0.21357	0.393297	0.874355	-1.32693	3.57733e-07	4.05151e-06	-2.93154	1.47473e-30	1.07048e-28	-2.47772	5.27329e-18	3.07817e-16
Zm00001eb018660	220.785	190.895	687.325	824.135	737.575	1126.38	195.97	76.21	137.87	289.605	86.285	118.71	1.90024	2.53595e-12	3.92226e-11	1.95001	4.66036e-19	7.52619e-17	0.712636	0.00554224	0.0446747	0.563454	0.00207484	0.0204843	0.179129	0.630361	0.977421	-0.215867	0.294784	0.787825	-1.50879	5.47272e-10	9.33608e-09	-3.09561	1.87232e-55	6.04218e-53	-3.24619	1.83441e-31	3.41456e-29
Zm00001eb018670	36.505	10.55	13.045	11.1	12.905	9.22	10.205	8.99	12.94	11.42	8.805	11.345	-1.71753	3.25387e-11	4.27081e-10	0.290687	0.288362	0.640472	-0.500658	0.455347	0.782521	0.162286	0.368065	0.742099	-0.0299981	0.916011	1	-0.189781	0.649843	1	0.041003	0.751509	0.905382	-0.551535	0.123966	0.257951	0.299218	0.797686	0.945193
Zm00001eb018690	45.745	86.185	52.105	135.17	85.26	55.86	48.365	28.65	49.795	78.165	83.065	96.745	1.56309	3.75668e-12	5.66966e-11	-0.0155677	0.769325	0.985271	0.100394	0.43084	0.761965	0.692559	0.000438959	0.00562443	1.53571	5.71185e-07	2.1542e-05	0.958186	1.78909e-05	0.000618296	-0.79018	0.00336238	0.0147855	-0.0376283	0.931662	1	0.792372	0.0722491	0.193207
Zm00001eb018700	0.001	0.001	0.001	10.83	2.53	1.37	0.001	0.001	0.001	1.535	1.42	1.05	13.4027	4.6668e-16	1.1572e-14	11.3049	0.000569553	0.00603754	10.42	0.034958	0.171078	10.584	0.0156501	0.100066	10.4717	0.0312852	0.19159	10.0362	0.126951	0.53833	-2.81872	1.60343e-07	1.92419e-06	-0.833246	0.365316	0.561742	-0.383787	0.775424	0.93084
Zm00001eb018720	23.405	25.27	29.83	71.725	74.75	50.315	30.505	17.245	48.965	88.57	34.24	45.785	1.61566	1.05104e-06	6.67835e-06	1.56465	5.7099e-11	2.93482e-09	0.754225	0.0091959	0.0649258	1.53777	9.04334e-06	0.00019043	0.989505	0.00272945	0.0303769	-0.0968759	0.732058	1	0.304342	0.25813	0.469648	-1.12639	1.18692e-05	8.26587e-05	-0.136114	0.37301	0.611528
Zm00001eb018750	29.445	17.76	15	9.67	10.9	10.825	36.175	25.36	35.64	9.515	16.75	11.42	-1.60643	6.91758e-09	6.39833e-08	-0.704303	0.0936228	0.324849	-0.470595	0.490466	0.812061	-1.92672	9.14908e-08	3.07555e-06	-0.598394	0.0338727	0.203189	-1.64193	3.4246e-09	3.34143e-07	-0.0233122	0.930856	1	0.619833	0.038646	0.102468	0.0771956	0.934093	1
Zm00001eb018760	3.63	6.13	2.775	5.27	4.765	5.935	0.001	0.001	0.001	0.001	0.001	0.001	0.537833	0.391144	0.525721	-0.363411	0.637179	0.917861	1.09676	0.0283588	0.148572	0	1	1	0	1	1	0	1	1	-12.3636	4.31801e-06	3.98834e-05	-12.2183	5.21002e-06	3.93543e-05	-12.535	2.48653e-06	2.90929e-05
Zm00001eb018830	99.875	30.575	26.66	24.745	27.2	23.78	29.71	25.085	28.51	25.695	30.605	27.23	-2.01299	7.22327e-20	2.78558e-18	-0.168746	0.796082	0.994988	-0.164928	1	1	-0.209461	0.81133	1	0.286942	0.321706	0.758001	-0.0662711	0.833051	1	0.0543506	0.571645	0.775442	0.170161	0.350204	0.54586	0.195448	0.92826	1
Zm00001eb018840	6.345	0.48	1.25	2.015	1.12	0.82	5.485	2.49	2.545	4.13	2.815	2.76	-1.65484	0.000954925	0.00325625	1.22239	0.457855	0.804992	-0.608232	0.726675	0.956828	-0.40935	0.658876	0.939727	0.176989	1	1	0.117003	1	1	1.03536	0.0938186	0.224067	1.32964	0.120943	0.253181	1.75097	0.168174	0.356718
Zm00001eb018850	6.01	321.56	7.495	13.405	243.77	6.8	7.645	415.225	25.96	19.715	315.05	36.26	1.15733	0.000685648	0.00241568	-0.399567	0.140769	0.421133	-0.140394	1	1	1.36671	5.28896e-06	0.000117465	-0.398312	0.0487045	0.26041	0.482089	0.04622	0.294885	0.556522	0.0220964	0.0715913	0.37006	0.0155016	0.0479016	2.41477	3.25959e-10	7.44114e-09
Zm00001eb018860	20.99	9.93	5.345	6.925	9.3	5.04	6.405	5.09	8.505	3.405	5.7	5.5	-1.59982	6.85338e-07	4.50894e-06	-0.094563	1	1	-0.0847662	1	1	-0.911544	0.149712	0.454631	0.163296	0.888976	1	-0.62888	0.167979	0.619165	-1.02416	0.091743	0.220152	-0.706269	0.0931233	0.206585	0.126008	1	1
Zm00001eb018870	19.77	52.72	34.665	26.265	72.97	88.095	60.25	73.29	55.025	47.395	77.005	71.36	0.409829	0.153528	0.252315	0.468953	0.0174837	0.0972798	1.34558	1.91174e-08	1.15576e-06	-0.346226	0.37637	0.750279	0.0713358	0.865489	1	0.375028	0.120396	0.522623	0.851593	0.000231526	0.00143825	0.0776487	0.525362	0.714232	-0.303945	0.101694	0.247456
Zm00001eb018880	43.005	26.61	29.465	30.73	24.395	27.285	0.705	0.69	0.91	0.75	0.62	0.685	-0.484857	0.0178639	0.0418544	-0.125383	0.923298	1	-0.110894	0.807289	0.992494	0.0892673	1	1	-0.154328	1	1	-0.409763	1	1	-5.35661	4.9609e-26	3.4378e-24	-5.29817	2.12937e-25	1.13843e-23	-5.31586	1.36097e-20	1.01759e-18
Zm00001eb018900	146.635	205.84	160.3	199.705	74.55	92.175	133.695	145.145	96.175	143.545	50.46	51.11	0.445641	0.134058	0.225875	-1.46524	0.000243828	0.0029128	-0.798327	0.028317	0.148433	0.102558	0.340158	0.713625	-1.52428	2.1315e-10	1.63956e-08	-0.912056	0.000162469	0.00397429	-0.476367	0.218187	0.418041	-0.563068	0.0809741	0.185012	-0.85077	0.00102423	0.00609911
Zm00001eb018910	4.13	2.115	5.3	8.405	3.28	9.705	24.69	30.715	10.24	42.225	5.495	5.575	1.02511	0.101769	0.181392	0.633038	0.463589	0.807162	0.872736	0.0225317	0.125325	0.774171	0.0149895	0.0972053	-2.48275	1.34183e-14	2.1466e-12	-0.877172	0.0509187	0.315378	2.32878	5.48368e-06	4.96389e-05	0.744424	0.128283	0.264232	-0.799756	0.0420664	0.12714
Zm00001eb018930	8.385	9.01	12.015	11.81	9.67	9.76	6.625	8.695	5.32	7.58	3.915	4.58	0.494126	0.150376	0.248178	0.101989	0.635412	0.917116	-0.299884	0.84736	1	0.194277	0.536876	0.871321	-1.15117	0.0118773	0.0955745	-0.216079	0.759363	1	-0.639739	0.18155	0.366321	-1.3045	0.00262647	0.0103899	-1.09153	0.00762011	0.0324129
Zm00001eb018950	3.77	9.585	8.525	5.8	6.765	4.69	1.785	2.48	5.435	2.305	2.155	5.14	0.621488	0.200403	0.312392	-0.502688	0.307019	0.662043	-0.862112	0.182493	0.484586	0.368843	0.647848	0.932535	-0.202652	0.814655	1	-0.0805117	1	1	-1.33129	0.032895	0.09929	-1.6504	0.0022563	0.00908933	0.13218	1	1
Zm00001eb018960	0.33	1.1	0.001	3.385	8.06	0.565	2.685	1.12	1.38	8.76	14.425	2.685	3.35862	0.000633712	0.00225	2.87328	6.42748e-05	0.000930065	9.14211	0.50179	0.815753	1.70601	0.000415471	0.00535782	3.687	1.59812e-09	1.03406e-07	0.960254	0.347612	0.840109	1.37178	0.00252917	0.0115527	0.83972	0.0308623	0.0851248	2.2486	0.0584407	0.164177
Zm00001eb018980	124.935	46.74	39.765	37.99	43.425	27.305	33.12	29.33	37.69	30.48	39.025	35.145	-1.71749	1.02276e-15	2.42143e-14	-0.106132	0.953787	1	-0.542334	0.198456	0.508782	-0.11984	0.965772	1	0.412022	0.185546	0.580545	-0.100862	0.714251	1	-0.317757	0.35267	0.578598	-0.154127	0.657441	0.820836	0.364154	0.516138	0.742646
Zm00001eb019050	13.045	8.205	8.415	19.66	18.51	24.04	22.705	14.03	21.55	38.725	27.15	56.43	0.591766	0.0585133	0.114196	1.17373	0.000981688	0.00955466	1.5144	6.51536e-05	0.00123811	0.770255	0.000296912	0.00403941	0.952437	0.00634573	0.059417	1.38877	6.3144e-08	4.55233e-06	0.978002	6.09505e-05	0.000438506	0.552647	0.0311071	0.0856324	1.23103	0.00153727	0.00860912
Zm00001eb019130	30.785	4.785	5.41	6.725	6.215	4.54	5.925	4.395	7.23	6.23	5.06	6.735	-2.19462	4.58047e-14	8.77392e-13	0.377235	0.374934	0.731252	-0.252936	1	1	0.072417	0.707838	0.963296	0.203274	0.875939	1	-0.102318	0.903442	1	-0.110302	1	1	-0.296617	0.628413	0.799319	0.568986	0.526012	0.750302
Zm00001eb019160	118.01	81.115	76.745	40.465	39.575	61.435	104.69	93.12	77.445	51.92	49.695	71.415	-1.54416	8.42057e-14	1.56378e-12	-1.03538	0.000101775	0.00138649	-0.321012	0.638674	0.905432	-1.01176	0.000261648	0.00364365	-0.90599	5.61381e-05	0.00119207	-0.116945	0.612822	0.995381	0.359616	0.0754666	0.190235	0.328511	0.0611342	0.148063	0.217166	0.841806	0.969211
Zm00001eb019220	6.465	4.44	4.67	2.58	2.6	1.785	2.01	1.625	2.71	1.15	1.84	3.005	-1.32528	0.00319267	0.00944848	-0.772048	0.236755	0.578122	-1.3875	0.108205	0.357057	-0.805562	0.424202	0.792091	0.179266	1	1	0.149072	1	1	-1.16574	0.253721	0.465198	-0.498806	0.685592	0.841054	0.751441	0.538984	0.761016
Zm00001eb019230	68.415	30.425	16.25	22.435	20.555	9.82	16.565	13.835	15.235	9.55	15.9	13.775	-1.60856	4.30671e-14	8.30422e-13	-0.565768	0.100327	0.340215	-0.726645	0.214234	0.531378	-0.794566	0.0952535	0.34671	0.200704	0.654571	0.99069	-0.145337	0.683241	1	-1.23218	0.000266648	0.00162865	-0.370463	0.223765	0.400237	0.488257	0.51251	0.742259
Zm00001eb019240	40.62	45.37	39.155	22.735	28.91	28.81	26.98	23.08	27.62	20.23	9.66	13.63	-0.837275	0.000278603	0.00108125	-0.65017	0.0267068	0.133315	-0.442627	0.38537	0.721265	-0.415394	0.383556	0.75615	-1.25655	1.91515e-05	0.000467598	-1.01893	0.000650828	0.0125309	-0.168419	0.857345	0.965037	-1.58147	9.36959e-09	1.10072e-07	-1.07978	0.000248461	0.00178889
Zm00001eb019250	68.18	16.4	24.865	23.43	19.955	27.29	25	26.115	20.86	23.95	21.72	20.725	-1.54099	5.86168e-12	8.53185e-11	0.283054	0.213232	0.543761	0.134256	0.275002	0.605794	-0.0619024	0.81044	1	-0.265855	0.291688	0.719862	-0.00936706	1	1	0.0316687	0.685683	0.85924	0.122274	0.511157	0.701868	-0.397	0.115965	0.272465
Zm00001eb019280	20.995	0.001	3.465	4.72	0.415	4.47	6.465	0.001	4.175	5.5	0.001	2.85	-2.15319	7.29301e-11	9.05918e-10	8.69697	0.503831	0.834965	0.367419	0.377878	0.713126	-0.233219	1	1	0	1	1	-0.550814	0.356667	0.847704	0.220645	0.611891	0.806352	-8.69697	0.502571	0.69435	-0.649313	0.244771	0.4634
Zm00001eb019330	11.315	11.305	15.415	12.49	11.085	14.32	6.77	5.485	8.1	4.13	5.85	8.175	0.142537	0.785095	0.874202	-0.0283522	0.935395	1	-0.106303	0.879403	1	-0.713014	0.238675	0.59577	0.092945	1	1	0.0132968	1	1	-1.59656	0.000293567	0.001771	-0.9221	0.0195743	0.0580683	-0.808741	0.0201449	0.071391
Zm00001eb019440	71.285	1.13	1.285	1.885	0.22	0.001	0.001	2.265	2.415	0.23	0.001	0.001	-5.24096	4.26066e-51	2.23131e-48	-2.36075	0.245859	0.589801	-10.3276	0.0798114	0.29214	7.84549	1	1	-11.1453	0.0269273	0.173372	-11.2378	0.00221797	0.032782	-3.03486	0.0270177	0.0844469	-7.78136	1	1	0	1	1
Zm00001eb019460	21.25	16.01	17	15.88	23.465	14.505	71.86	45.725	82.16	56.51	112.84	130.205	-0.420252	0.0905893	0.164545	0.551537	0.0260277	0.130748	-0.228984	0.941328	1	-0.346683	0.390458	0.759306	1.30322	1.58684e-07	6.8226e-06	0.664277	0.012714	0.123217	1.8313	4.46875e-15	1.33112e-13	2.2657	3.90008e-24	1.9381e-22	3.16616	2.8785e-17	1.54165e-15
Zm00001eb019580	13.785	8.765	9.8	14.825	17.03	16.28	1.075	1.785	2.035	1.645	3.335	2.685	0.104933	0.868432	0.936706	0.958252	0.0012657	0.0117595	0.732247	0.0103023	0.0710582	0.613751	0.584309	0.901104	0.901763	0.383689	0.818559	0.399893	0.653201	1	-3.17187	8.65923e-11	1.65447e-09	-2.35232	7.96967e-10	1.07432e-08	-2.60011	2.51173e-08	4.18905e-07
Zm00001eb019590	49.565	46.915	38.07	26.365	26.64	19.345	68.655	60.18	60.075	47.595	47.42	40.44	-0.910698	2.41266e-05	0.000118506	-0.816455	0.00450233	0.0335393	-0.976694	0.00430022	0.0366881	-0.528555	0.0843797	0.32065	-0.343788	0.131593	0.482211	-0.570982	0.00894548	0.0954013	0.852186	8.7179e-05	0.000604446	0.831902	3.98382e-05	0.000248908	1.06382	0.00248134	0.0128624
Zm00001eb019620	14.85	10.275	10.055	28.025	24.665	17.915	26.245	25.215	24.8	60.255	29.545	26.825	0.916251	0.00169424	0.00541022	1.26333	4.34113e-06	8.4665e-05	0.833255	0.00479295	0.039744	1.19904	9.14912e-08	3.07555e-06	0.228632	0.595561	0.962468	0.113238	0.708718	1	1.10437	7.03958e-07	7.50595e-06	0.260449	0.16563	0.321316	0.58241	0.185666	0.383215
Zm00001eb019650	34.625	35.325	40.605	36.665	29.365	39.52	112.2	111.085	86.04	121.275	91.625	77.885	0.0825895	0.865191	0.934537	-0.266592	0.522357	0.847554	-0.0390744	0.634813	0.902036	0.11221	0.268801	0.629932	-0.277851	0.231523	0.653448	-0.143662	0.515081	0.949321	1.72581	1.74608e-12	3.99879e-11	1.64164	1.3549e-12	2.55211e-11	0.978763	0.0142249	0.0539372
Zm00001eb019690	1.21	2.04	2.68	2.15	0.535	1.145	0.001	0.001	0.001	0.001	0.001	0.001	0.82933	0.279445	0.404649	-1.93096	0.0713279	0.269548	-1.22689	0.331495	0.669858	0	1	1	0	1	1	0	1	1	-11.0701	0.00122396	0.00619602	-9.0634	0.254632	0.437833	-10.1611	0.109764	0.261449
Zm00001eb019700	17.255	23.335	19.61	35.27	34.59	27.85	24.825	32.975	18.175	43.35	55.345	27.895	1.03143	2.29537e-05	0.000113255	0.56786	0.017052	0.0955689	0.506088	0.0374932	0.178824	0.804238	0.000145568	0.00220174	0.74708	0.00534578	0.0517818	0.618051	0.028899	0.219055	0.29759	0.0953945	0.226778	0.678098	0.00161196	0.00678128	0.00232922	0.651241	0.846898
Zm00001eb019710	1.425	6.765	7.105	11.01	9.975	4.99	7.51	15.975	8.105	14.99	18.995	11.545	2.94978	6.51272e-10	7.0703e-09	0.560227	0.15574	0.450244	-0.509795	0.577215	0.868512	0.997116	0.00210453	0.0207145	0.249804	0.512806	0.906048	0.510384	0.255656	0.744237	0.445186	0.105939	0.246073	0.929231	0.00194817	0.00803785	1.21016	0.0399768	0.122339
Zm00001eb019730	83.59	46.57	44.02	40.05	42.075	33.93	31.99	29.765	37.99	28.55	35.665	43.83	-1.06153	1.74239e-05	8.80612e-05	-0.146438	0.810877	0.998922	-0.375598	0.505517	0.81758	-0.16413	0.964524	1	0.260892	0.353143	0.791032	0.206299	0.401904	0.880338	-0.488311	0.10688	0.247783	-0.238454	0.416799	0.614248	0.369357	0.466783	0.701929
Zm00001eb019760	4.595	1.925	3.41	2.595	1.175	1.54	0.24	0.001	0.001	0.25	0.215	0.001	-0.82433	0.197685	0.308705	-0.712198	0.611043	0.905016	-1.14684	0.263672	0.591723	0.0588937	1	1	7.74819	1	1	0	1	1	-3.37573	0.00318048	0.0140736	-2.45025	0.126755	0.261889	-10.5887	0.0249301	0.0844798
Zm00001eb019770	15.27	38.34	54.135	32.295	35.685	38.26	43.12	37.145	53.24	34.35	36.715	46.39	1.08061	1.57097e-05	8.00152e-05	-0.103533	0.972462	1	-0.500725	0.236492	0.560527	-0.328047	0.445498	0.809629	-0.0167984	0.8958	1	-0.198697	0.364675	0.854011	0.0889993	0.464217	0.687911	0.0410518	0.657675	0.820982	0.277977	0.661962	0.853521
Zm00001eb019790	2.66	13.6	10.61	11.815	7.88	12.515	12.805	12.71	15.615	13.64	18.515	14.135	2.15112	2.49633e-07	1.79283e-06	-0.787339	0.062435	0.246443	0.238234	0.244635	0.572002	0.0911364	0.601974	0.911927	0.542731	0.123553	0.467948	-0.143661	0.692644	1	0.207224	0.456267	0.680381	1.23243	3.57166e-05	0.000225789	0.175614	1	1
Zm00001eb019800	35.99	17.295	20.26	17.985	17.085	20.585	25.375	24.09	27.67	25.065	25.825	28.58	-1.0008	1.20429e-05	6.28176e-05	-0.0176248	0.799549	0.995897	0.0229593	0.497535	0.815753	-0.0177336	0.692623	0.955399	0.100334	0.81537	1	0.0466833	0.87461	1	0.47888	0.0255041	0.0806204	0.596038	0.00638637	0.0224457	0.473412	0.326759	0.561502
Zm00001eb019830	50.775	70.875	36.1	83.685	50.425	30.23	63.96	160.48	23.51	146.645	135.75	27.205	0.720851	0.00326714	0.00964922	-0.491138	0.0877814	0.310152	-0.256018	0.88791	1	1.19709	1.73687e-09	8.25093e-08	-0.241441	0.329692	0.766911	0.210597	0.462139	0.926856	0.809287	1.91265e-05	0.000154707	1.42874	6.3701e-13	1.25735e-11	-0.152109	0.375238	0.613594
Zm00001eb019840	102.475	90.06	91.985	55.615	46.06	58.915	155.96	87.535	107.075	50.93	57.72	64.79	-0.881726	0.000116886	0.000497103	-0.967372	0.000537978	0.00576119	-0.642764	0.128845	0.392622	-1.61459	2.76039e-09	1.24529e-07	-0.600789	0.0211004	0.145609	-0.724779	0.00127069	0.0214851	-0.126958	0.925312	1	0.325557	0.0846336	0.191705	0.137136	0.98538	1
Zm00001eb019850	56.05	28.995	24.19	22.865	20.915	21.875	24.87	22.005	25.365	23.385	19.74	24.455	-1.29357	1.63072e-09	1.65827e-08	-0.471266	0.143637	0.427192	-0.145128	0.912445	1	-0.0888231	0.919758	1	-0.156709	0.508315	0.902679	-0.0527097	0.864062	1	0.0324425	0.658916	0.840858	-0.083416	1	1	0.160846	1	1
Zm00001eb019860	7.9	8.35	10.02	9.995	5.02	3.21	18.655	9.46	10.465	11.625	9.4	9.995	0.339354	0.410836	0.545608	-0.734089	0.214736	0.54609	-1.64224	0.0155209	0.0959756	-0.682332	0.197067	0.537107	-0.00917943	1	1	-0.0662938	0.922352	1	0.217952	0.380148	0.60603	0.904973	0.0185136	0.0554124	1.63863	0.00539357	0.0245244
Zm00001eb019870	0.675	6.77	5.11	6.005	5.48	1.305	6.135	7.15	5.135	6.235	4.52	3.86	3.1532	3.24416e-07	2.27988e-06	-0.30498	0.715404	0.959656	-1.96927	0.0155569	0.096107	0.0233262	0.84746	1	-0.66162	0.188662	0.585661	-0.411763	0.499082	0.944807	0.0542253	0.821729	0.945776	-0.277853	0.722331	0.868776	1.56455	0.148492	0.32526
Zm00001eb019880	0.585	2.755	0.74	3.925	3.51	0.35	0.001	0.001	1.24	2.57	2.595	1.855	2.74618	0.000174695	0.000713186	0.349419	0.488002	0.826403	-1.08017	1	1	11.3276	0.000490747	0.00618132	11.3415	0.000980597	0.0131988	0.581079	0.774807	1	-0.610924	0.404056	0.628963	-0.435736	0.603918	0.780304	2.40599	0.205486	0.410907
Zm00001eb019930	3.43	14.3	14.045	8.94	16.575	11.345	1.62	10.245	2.81	1.67	4.375	3.295	1.38207	0.00300934	0.00896876	0.212994	0.377968	0.734105	-0.308	0.866855	1	0.0438543	1	1	-1.22757	0.113742	0.444502	0.229708	0.84167	1	-2.42043	0.000117065	0.000787769	-1.92165	0.0075537	0.025947	-1.78371	7.46766e-05	0.000626257
Zm00001eb019940	0.001	0.001	0.001	0.001	0.001	0.001	5.43	10.73	2.94	5.75	12.005	3.45	0	1	1	0	1	1	0	1	1	0.0826098	0.74156	0.979462	0.161985	0.792554	1	0.23078	0.848027	1	12.4893	2.44217e-07	2.84024e-06	13.5513	7.44217e-15	1.75783e-13	11.7524	0.000491248	0.00325113
Zm00001eb019960	5.765	1.335	2.24	1.545	1.82	1.85	1.365	1.89	1.525	1.04	1.27	1.56	-1.89971	0.000351067	0.00132765	0.447099	0.612782	0.905792	-0.275973	1	1	-0.392317	1	1	-0.573558	0.774516	1	0.0327368	1	1	-0.571023	0.778947	0.922758	-0.51911	0.80573	0.925846	-0.245979	0.804732	0.948381
Zm00001eb019970	28.965	9.275	9.985	6.49	7.985	5.76	1.22	2.22	1.275	1.77	2.195	0.415	-2.15802	4.07127e-11	5.2671e-10	-0.216055	0.797381	0.995422	-0.793694	0.15867	0.4463	0.536868	0.581247	0.899029	-0.0163387	1	1	-1.61931	0.457958	0.925758	-1.87447	0.000945316	0.00496004	-1.86307	0.000163822	0.000893333	-3.79489	1.84551e-05	0.000180868
Zm00001eb020020	3.535	1.27	1.54	4.865	3.84	6.84	0.43	0.001	0.335	0.31	0.435	0.25	0.46073	0.437135	0.572634	1.59628	0.0274828	0.136344	2.15107	0.000259452	0.00389583	-0.472068	1	1	8.76487	0.500038	0.902459	-0.422233	1	1	-3.9721	2.72949e-05	0.000213171	-3.14202	0.000270457	0.00139472	-4.774	1.89181e-06	2.28166e-05
Zm00001eb020030	28.2	83.96	64.69	133.2	69.95	73.185	0.001	0.001	0.001	0.001	0.465	0.001	2.23983	1.6345e-22	8.06014e-21	-0.263378	0.610479	0.904739	0.178005	0.280767	0.613993	0	1	1	8.86109	0.500038	0.902459	0	1	1	-17.0232	4.43097e-75	7.40775e-72	-7.23295	1.70821e-30	1.22996e-28	-16.1593	2.06042e-30	3.60817e-28
Zm00001eb020040	11.65	16.8	16.6	15.045	15.215	10.965	19.36	14.965	24.8	16.165	14.29	23.19	0.368954	0.279948	0.405221	-0.142967	0.89216	1	-0.598277	0.250841	0.577375	-0.260205	0.751285	0.984631	-0.0665864	0.872111	1	-0.0968373	0.726567	1	0.103589	0.512336	0.728342	-0.0904884	1	1	1.0806	0.0079759	0.0336454
Zm00001eb020060	3.005	2.665	1.565	2.575	2.34	0.325	4.125	5.645	4.11	3.005	3.735	3.29	-0.222793	0.750249	0.84751	-0.187627	1	1	-2.26765	0.130476	0.395875	-0.457029	0.620709	0.921852	-0.595865	0.252713	0.674419	-0.321051	0.600636	0.990691	0.222793	0.716404	0.880517	0.6746	0.295776	0.486362	3.33958	0.00342749	0.0167339
Zm00001eb020070	0.001	0.001	0.001	0.001	0.001	0.001	28.955	9.37	15.14	37.54	12.14	10.97	0	1	1	0	1	1	0	1	1	0.374616	0.110391	0.379099	0.373647	0.408624	0.840786	-0.464802	0.247761	0.736418	15.1961	2.21722e-27	1.61164e-25	13.5675	2.73418e-15	6.75599e-14	13.4213	5.37781e-09	1.01307e-07
Zm00001eb020100	1.78	5.19	1.625	1.365	2.315	0.63	1.14	2.445	2.095	1.62	11.65	1.535	-0.382976	0.666042	0.779246	-1.16472	0.162588	0.462803	-1.36702	0.508016	0.81758	0.50696	0.581247	0.899029	2.25242	3.73427e-05	0.000838714	-0.448712	0.79583	1	0.247093	1	1	2.33125	4.0206e-07	3.6944e-06	1.28481	0.534292	0.756728
Zm00001eb020110	163.705	228.76	180.83	150.245	172.455	101.65	289.02	327.435	294.155	240.255	280.7	235.365	-0.123781	0.430823	0.56652	-0.407615	0.147606	0.434971	-0.831024	0.0111972	0.0757044	-0.266603	0.547753	0.877462	-0.222179	0.253673	0.675473	-0.321677	0.128435	0.539562	0.677249	0.000333771	0.00197742	0.702809	1.72128e-05	0.000115812	1.21129	7.86901e-05	0.000655783
Zm00001eb020130	41.905	21.05	24.845	15.28	14.43	15.375	13.2	9.095	13.14	8.485	11.84	17.28	-1.45548	4.52534e-10	5.0381e-09	-0.544749	0.125225	0.393341	-0.692369	0.0956074	0.328833	-0.637551	0.210886	0.557919	0.380524	0.367746	0.805751	0.395138	0.246729	0.735416	-0.848658	0.0242152	0.0773043	-0.285402	0.45015	0.646294	0.168517	1	1
Zm00001eb020160	0.001	0.001	0.001	0.001	0.001	0.001	5.96	8.59	8.48	4.485	5.305	5.77	0	1	1	0	1	1	0	1	1	-0.410204	0.698292	0.958394	-0.695305	0.12659	0.471903	-0.555493	0.217582	0.698024	12.1309	4.5255e-06	4.16561e-05	12.3731	2.62478e-08	2.89342e-07	12.4944	3.35812e-06	3.84128e-05
Zm00001eb020170	20.215	22.8	7.695	17.755	12.805	5.035	15.69	6.135	10.655	20.775	16.87	14.045	-0.187201	0.407219	0.541961	-0.832327	0.0248999	0.126541	-0.61193	0.362728	0.69931	0.405003	0.102168	0.360909	1.45932	0.000256871	0.00437502	0.398526	0.342343	0.835415	0.226623	0.306223	0.527747	0.397753	0.126093	0.261262	1.47999	0.00424269	0.020027
Zm00001eb020200	150.825	96.495	91.985	69.145	74.305	54.645	100.525	67.65	106.81	66.245	102.79	129.66	-1.12518	1.18493e-07	9.01177e-07	-0.376995	0.205924	0.531982	-0.751309	0.0366161	0.175778	-0.601671	0.0358359	0.18029	0.603538	0.0141234	0.108159	0.279687	0.190137	0.654101	-0.0618134	0.893506	0.98561	0.468169	0.00742761	0.0255619	1.24657	6.9694e-05	0.000591178
Zm00001eb020240	12.745	19.41	17.815	21.235	12.95	7.86	9.365	10.545	11.355	4.47	3.995	6.535	0.736513	0.0155868	0.0372902	-0.583848	0.146608	0.433177	-1.18049	0.0409031	0.189146	-1.067	0.0315517	0.16523	-1.40029	0.000968693	0.0130787	-0.797069	0.0356904	0.250557	-2.2481	4.17797e-09	6.339e-08	-1.69668	3.17787e-05	0.000203245	-0.266342	0.54842	0.768978
Zm00001eb020250	20.61	15.945	20.345	10.13	10.595	10.97	10.07	6.815	10.22	4.88	5.95	8.94	-1.02471	0.000415211	0.00154195	-0.589721	0.147248	0.43434	-0.891111	0.0342257	0.168861	-1.04511	0.0382716	0.188994	-0.195824	0.687053	1	-0.193048	0.681188	1	-1.05368	0.0249378	0.0791483	-0.832422	0.0553615	0.136946	-0.295217	0.296941	0.526476
Zm00001eb020260	10.31	17.625	11.49	25.775	36.37	20.58	9.035	21.575	11.71	27.415	43.395	20.06	1.32193	2.26178e-06	1.35124e-05	1.04513	2.40529e-05	0.0003894	0.840864	0.00114198	0.0131649	1.60137	1.53682e-06	3.89984e-05	1.00817	0.000142773	0.00265545	0.776581	0.0209869	0.174469	0.088993	0.538537	0.749614	0.25478	0.151079	0.299309	-0.0369214	0.601973	0.811056
Zm00001eb020280	42.06	41.875	55.565	39.115	39.69	53.965	22.175	21.655	21.62	15.09	18.385	27.77	-0.104727	0.523908	0.653575	-0.0773136	0.975214	1	-0.0421524	0.565516	0.859163	-0.555341	0.163184	0.479621	-0.236171	0.387498	0.820085	0.361161	0.218623	0.6986	-1.37413	6.83383e-07	7.31193e-06	-1.11025	8.46251e-06	6.09815e-05	-0.958497	9.51343e-05	0.00077749
Zm00001eb020290	1.405	4.505	6.655	3.49	3.17	7.585	1.265	2.17	2.295	1.545	1.235	2.445	1.31266	0.0333941	0.0712244	-0.507044	0.536335	0.857519	0.188711	0.447659	0.778781	0.288469	0.774517	0.993672	-0.813184	0.581243	0.952373	0.0913403	1	1	-1.17562	0.126739	0.281607	-1.35997	0.0651374	0.155486	-1.63331	0.00547297	0.0248092
Zm00001eb020340	1652.91	393.67	404.21	438.74	366.125	225.07	492.13	411.82	391.43	395.185	409.61	326.85	-1.91357	3.4795e-15	7.72124e-14	-0.10465	0.937222	1	-0.844731	0.00881121	0.0627379	-0.316511	0.427826	0.794981	-0.00776296	0.878207	1	-0.260126	0.308473	0.799422	-0.150838	0.822158	0.945807	0.161915	0.259841	0.444179	0.538255	0.149449	0.326878
Zm00001eb020350	30.63	18.98	36.775	11.94	9.93	9.945	15.795	16.815	19.3	8.55	11.87	8.59	-1.35914	6.01038e-07	4.00463e-06	-0.934614	0.0120144	0.0725411	-1.88668	6.04824e-07	2.31903e-05	-0.885472	0.0664944	0.275136	-0.502429	0.15766	0.532049	-1.16787	0.000319143	0.0069664	-0.481807	0.354224	0.580145	0.257454	0.347202	0.542708	-0.211313	0.40182	0.640192
Zm00001eb020360	5.665	14.505	18.325	12.97	13.805	13.97	11.12	12.445	16.48	12.705	18.225	15.48	1.19503	0.000496865	0.00180826	-0.0713594	1	1	-0.391481	0.596725	0.881729	0.19224	0.384547	0.756374	0.550353	0.108478	0.433048	-0.0903108	0.821157	1	-0.0297821	0.944389	1	0.400728	0.102544	0.222851	0.148073	1	1
Zm00001eb020370	50.645	103.365	122.22	111.93	102.055	107.185	111.41	108.525	111.385	105.37	104.87	106.385	1.14411	7.47771e-08	5.88353e-07	-0.0184009	0.757926	0.979735	-0.189377	0.989897	1	-0.0804146	0.78531	0.998778	-0.0494254	0.742623	1	-0.0662602	0.760679	1	-0.0871326	0.969555	1	0.0392552	0.613461	0.786876	-0.0108083	0.526688	0.750984
Zm00001eb020390	5.02	20.465	12.595	15.85	14.935	19.95	15.73	23.85	17.455	17.725	19.575	20.225	1.65872	1.26838e-06	7.92284e-06	-0.454461	0.232438	0.571695	0.663538	0.0154434	0.095587	0.172267	0.330532	0.702963	-0.284977	0.249471	0.673115	0.212499	0.5128	0.947411	0.161303	0.402622	0.627543	0.390315	0.0981124	0.21514	0.019751	0.727058	0.899664
Zm00001eb020410	7.295	13.05	6.775	7.295	7.065	1.58	3.495	2.835	3.5	2.685	2.47	1.54	0	1	1	-0.885288	0.0744791	0.27737	-2.1003	0.00213698	0.0213994	-0.38037	0.858669	1	-0.198838	0.824785	1	-1.18442	0.145261	0.573227	-1.44199	0.0093244	0.0351606	-1.51618	0.00412066	0.0153807	-0.0369942	1	1
Zm00001eb020440	0.925	0.3	0.83	0.35	0.51	0.001	7.515	7.295	7.645	5.875	7.855	8.99	-1.4021	0.302424	0.430356	0.765535	1	1	-9.69697	0.250077	0.576127	-0.355184	0.628666	0.924174	0.106703	0.901614	1	0.233805	0.654266	1	4.06916	1.68405e-07	2.01371e-06	3.94504	1.5836e-09	2.06911e-08	13.1341	3.10243e-09	6.07656e-08
Zm00001eb020500	14.08	3.155	2.835	2.135	2.66	3.535	3.135	2.86	3.505	2.37	3.325	3.595	-2.72134	1.06298e-10	1.29041e-09	-0.246214	1	1	0.318361	0.429038	0.760692	-0.403578	0.840649	1	0.217339	1	1	0.0365773	1	1	0.150651	0.84382	0.957711	0.321928	0.592597	0.771157	0.0242816	1	1
Zm00001eb020510	6.125	7.15	8.065	12.78	7.285	2.635	9.585	6.88	9.27	6.56	6.63	4.97	1.06111	0.00236574	0.00725883	0.0269857	0.912944	1	-1.61387	0.00633885	0.0496339	-0.547083	0.389077	0.75857	-0.0533997	1	1	-0.899323	0.0797286	0.414269	-0.96212	0.0239936	0.0767251	-0.13592	0.919697	0.995465	0.915443	0.324839	0.559141
Zm00001eb020580	21.94	32.525	50.885	148.34	95.81	126.005	46.86	40.785	43.94	85.435	56.295	50.52	2.75727	1.01146e-13	1.85992e-12	1.55863	0.00111882	0.0106438	1.30817	1.33998e-05	0.000329245	0.86647	5.94862e-06	0.000130466	0.464968	0.0656655	0.312976	0.20132	0.402617	0.880739	-0.796009	0.0266761	0.0836432	-0.767169	0.000944696	0.00425129	-1.31855	4.88935e-07	6.53994e-06
Zm00001eb020590	28.695	92.665	66.55	62.215	125.305	164.805	0.001	0.001	0.001	0.001	0.001	0.001	1.11646	0.341417	0.472992	0.435348	0.0505241	0.212373	1.30825	1.47391e-05	0.000357424	0	1	1	0	1	1	0	1	1	-15.925	9.73421e-06	8.41294e-05	-16.9351	2.21849e-76	5.40201e-73	-17.3304	1.32202e-54	3.19904e-51
Zm00001eb020600	19.305	3.595	8.925	39.21	13.15	13.655	25.885	8.66	11.74	36.865	17.435	15.595	1.02225	0.0003875	0.00145036	1.871	3.14572e-05	0.000494581	0.613505	0.0388837	0.18302	0.510135	0.0104677	0.0739339	1.00955	0.0190634	0.135229	0.409651	0.274176	0.767394	-0.0889699	1	1	0.406924	0.17626	0.336622	0.191654	1	1
Zm00001eb020610	0.71	0.001	0.54	0.69	1.95	2.895	0.7	0.001	0.001	0.815	0.001	0.001	-0.0412227	1	1	10.9293	0.0175333	0.0974934	2.42253	0.0130015	0.0840136	0.219445	1	1	0	1	1	0	1	1	0.240204	1	1	-10.9293	0.0128869	0.0408832	-11.4993	0.000992229	0.00594043
Zm00001eb020630	0.155	0.001	0.645	7	10.775	9.55	0.001	0.001	0.415	1.19	0.42	0.985	5.49701	2.08726e-08	1.80082e-07	13.3954	5.19789e-08	1.57211e-06	3.88813	4.55404e-09	3.33484e-07	10.2167	0.0312858	0.164235	8.71425	0.500038	0.902459	1.24701	0.7104	1	-2.55639	0.000782633	0.00420459	-4.68115	1.51102e-06	1.25691e-05	-3.27731	1.84137e-06	2.22385e-05
Zm00001eb020660	29.565	144.83	69.925	37.48	73.84	32.11	48.17	71.925	46.96	30.205	56.84	40.515	0.342231	0.186323	0.294688	-0.971886	0.000291458	0.00339801	-1.12279	0.00096534	0.0115009	-0.673348	0.0278686	0.1522	-0.339587	0.138656	0.495829	-0.212976	0.354696	0.845342	-0.311334	0.403883	0.628876	-0.377496	0.130268	0.267456	0.335433	0.543987	0.765683
Zm00001eb020690	237.285	82.44	81.185	94.625	113.9	73.05	65.56	68.94	76.61	76.045	83.445	63.92	-1.32633	1.46104e-10	1.7477e-09	0.466351	0.0154703	0.0886604	-0.152329	0.897752	1	0.214038	0.123408	0.407206	0.275484	0.287349	0.717792	-0.261265	0.234775	0.7189	-0.315368	0.360431	0.586481	-0.44887	0.0456519	0.117069	-0.192617	0.202779	0.407395
Zm00001eb020710	303.275	92.735	103.08	148.225	138.325	143.825	227.015	194.025	217.755	325.235	235.745	267.86	-1.03284	7.52473e-08	5.91519e-07	0.576876	0.00235261	0.0197209	0.48055	0.00986234	0.0686286	0.518695	0.00129307	0.0139248	0.280985	0.254453	0.676432	0.298773	0.141963	0.567206	1.13369	1.41783e-08	1.99819e-07	0.769165	3.41642e-06	2.66634e-05	0.897165	0.00430159	0.0202762
Zm00001eb020730	5.15	1.245	0.44	1.3	1.57	0.325	1.255	1.585	1.25	1.265	1.79	0.825	-1.98606	0.000655405	0.00231947	0.334619	1	1	-0.437064	1	1	0.01145	1	1	0.175477	1	1	-0.599462	0.727452	1	-0.0393742	1	1	0.189195	1	1	1.34395	0.641182	0.838629
Zm00001eb020740	15.46	22.1	29.95	34.16	32.055	32.145	22.46	19.75	20.91	43.525	33.68	43.55	1.14377	6.30268e-05	0.000283615	0.536503	0.0168653	0.0946857	0.102038	0.320805	0.657701	0.954486	6.69946e-06	0.000145181	0.770039	0.00442663	0.0444984	1.05848	4.37891e-05	0.00132924	0.349536	0.0751743	0.189648	0.0713427	0.603859	0.780304	0.438078	0.327843	0.562893
Zm00001eb020790	0.635	0.795	0.001	0.91	0.96	0.001	2.575	1.185	2.26	2.105	5.645	3.805	0.51911	1	1	0.27208	1	1	0	1	1	-0.290752	1	1	2.25209	0.0012202	0.0158219	0.751574	0.393724	0.874441	1.20988	0.172932	0.352976	2.55587	5.73429e-05	0.000345521	11.8937	0.000976878	0.00586435
Zm00001eb020860	45.66	79.005	102.6	114.765	103.76	111.67	100.015	101.865	90.29	114.435	105.93	94.89	1.32968	4.02927e-10	4.52623e-09	0.393235	0.0382015	0.174026	0.122211	0.221543	0.540113	0.194312	0.120967	0.402267	0.0564528	0.900064	1	0.0716898	0.753238	1	-0.00415436	0.679541	0.854144	0.0298608	0.657465	0.820836	-0.234914	0.136203	0.307606
Zm00001eb020870	10.075	13.515	8.76	6.945	8.22	4.465	21.225	17.37	28.47	12.985	15.16	22.98	-0.536733	0.130678	0.221448	-0.717351	0.0805956	0.29322	-0.972271	0.0906094	0.318481	-0.708919	0.0656678	0.272759	-0.196328	0.538639	0.926507	-0.309064	0.248643	0.738024	0.902799	0.00468024	0.0196072	0.883059	0.00323074	0.012435	2.36365	1.95504e-07	2.78284e-06
Zm00001eb020890	3.77	2.665	3.525	0.7	0.845	0.5	1.86	0.465	2.11	0.001	0.001	0.285	-2.42914	0.00160763	0.0051664	-1.65711	0.084819	0.303479	-2.81762	0.00742835	0.0553158	-10.8611	0.0108287	0.0759061	-8.86109	0.500038	0.902459	-2.88821	0.0449927	0.289831	-9.45121	0.26615	0.479347	-9.72281	0.12674	0.261879	-0.810966	1	1
Zm00001eb020900	16.715	22.785	28.455	8.78	14.525	31.1	11.115	8.195	11.27	8.44	7.89	8.91	-0.928851	0.0203447	0.0467303	-0.649546	0.121474	0.385587	0.128232	0.25804	0.58463	-0.397193	0.496918	0.84991	-0.0547186	1	1	-0.33899	0.551464	0.967206	-0.0569779	0.933042	1	-0.880441	0.0322694	0.0882438	-1.80342	1.14516e-05	0.000117645
Zm00001eb020950	1.48	2.875	1.93	3.515	3.73	3.005	12.165	11.155	15.525	23.09	11.915	14.88	1.24793	0.0709768	0.13417	0.375614	0.500813	0.834965	0.638764	0.271219	0.600523	0.924532	0.000289702	0.00395374	0.0950884	0.922294	1	-0.0612187	0.939922	1	2.71567	1.21466e-14	3.44183e-13	1.67553	1.04937e-05	7.39474e-05	2.30794	9.74169e-06	0.000101449
Zm00001eb020970	6.765	17.21	20.54	36.915	39.845	37.155	58.795	71.91	67.925	89.92	101.89	73.38	2.44805	2.11887e-17	6.18535e-16	1.21115	8.52428e-07	1.92654e-05	0.85512	0.0038614	0.0340858	0.612949	0.000496904	0.00624676	0.502748	0.061111	0.303294	0.111444	0.62307	0.998823	1.28443	2.93811e-09	4.535e-08	1.35454	3.00778e-10	4.26487e-09	0.981831	0.0138231	0.0526912
Zm00001eb020980	6.745	19.77	25.765	46.695	50.215	45.98	24.74	30.705	27.55	39.035	43.28	30.505	2.79138	5.34877e-23	2.74085e-21	1.34481	2.55117e-08	8.14942e-07	0.835594	0.0024347	0.0237203	0.657923	0.00110709	0.0122624	0.495227	0.0754054	0.343513	0.146993	0.575741	0.979663	-0.2585	0.500904	0.719542	-0.214418	0.486569	0.680029	-0.591961	0.0265584	0.088916
Zm00001eb021010	89.595	83.365	71.77	65.23	53.83	46.465	49.08	74.17	52.75	19.025	27.35	22.875	-0.457883	0.0177392	0.0416069	-0.631031	0.0190515	0.103797	-0.627237	0.108283	0.357178	-1.36724	1.24029e-06	3.22289e-05	-1.43929	1.79269e-09	1.14527e-07	-1.2054	5.15037e-07	2.85017e-05	-1.77764	3.47012e-11	6.91671e-10	-0.97687	2.05209e-05	0.000136356	-1.02237	5.72079e-05	0.000495206
Zm00001eb021040	85.825	33.08	34.475	49.08	42.515	32.54	13.5	8.555	10.14	13.735	16.24	11.91	-0.806263	0.000365973	0.00137786	0.362013	0.0693944	0.264881	-0.0833363	0.706913	0.94546	0.0248975	0.643495	0.931648	0.924712	0.0171062	0.124529	0.232116	0.568909	0.975133	-1.83728	2.56947e-10	4.57541e-09	-1.38842	9.67245e-09	1.13332e-07	-1.45004	1.64448e-06	2.0015e-05
Zm00001eb021050	94.21	30.365	21.575	60.325	39.885	29.5	46.56	35.06	28.92	115.145	27.345	40.325	-0.643124	0.0128552	0.0316187	0.393437	0.184238	0.499549	0.451354	0.138011	0.409808	1.30629	1.04787e-09	5.20628e-08	-0.358549	0.319983	0.755786	0.479607	0.110671	0.497983	0.932624	5.26921e-05	0.000384154	-0.544569	0.152428	0.301291	0.45096	0.467065	0.702234
Zm00001eb021070	22.78	14.225	17.06	14.735	12.39	14.565	32.9	30.91	38.085	32.165	27.11	34.775	-0.628521	0.0107397	0.0271029	-0.199252	0.757622	0.97966	-0.228112	0.94183	1	-0.0325959	0.699405	0.958749	-0.189249	0.394785	0.828592	-0.131172	0.593208	0.986321	1.12624	7.99996e-06	7.02762e-05	1.12965	3.37878e-06	2.6385e-05	1.25554	0.000843632	0.00517772
Zm00001eb021080	3.375	2.175	0.001	4.385	5.25	0.33	0.795	1.86	2.855	0.79	3.035	1.385	0.377689	0.633449	0.751523	1.2713	0.0223491	0.116963	8.36632	1	1	-0.00910221	1	1	0.706394	0.403627	0.836966	-1.0436	0.356516	0.84759	-2.47265	0.0023647	0.0109253	-0.790621	0.180869	0.34317	2.06935	0.251898	0.472152
Zm00001eb021090	28.775	20.66	7.85	30.62	26.405	3.215	19.62	11.935	28.095	21.075	22.745	17.13	0.0896584	0.84829	0.922177	0.353971	0.145002	0.430145	-1.28787	0.0693399	0.267342	0.103208	0.479023	0.83551	0.930351	0.0218415	0.149055	-0.713788	0.0700983	0.38179	-0.538942	0.125163	0.279022	-0.215262	0.603565	0.780175	2.41363	0.000114399	0.000910882
Zm00001eb021140	0.001	0.001	0.001	0.001	0.001	0.001	3.135	1.72	2.05	21.2	89.4	58.015	0	1	1	0	1	1	0	1	1	2.75753	1.57478e-10	8.80016e-09	5.69979	2.66184e-29	2.04147e-26	4.82273	1.36441e-21	9.31894e-19	14.3718	1.39649e-22	7.14241e-21	16.448	5.36727e-46	9.04165e-44	15.8241	4.27319e-25	4.56803e-23
Zm00001eb021150	1.205	4.395	1.64	1.345	1.84	1.375	0.001	0.001	0.001	0.001	0.001	0.001	0.158573	1	1	-1.25616	0.099994	0.339393	-0.254264	1	1	0	1	1	0	1	1	0	1	1	-10.3934	0.0195984	0.0650603	-10.8455	0.00407831	0.0152503	-10.4252	0.0412671	0.125343
Zm00001eb021160	1.92	8.98	2.58	4.285	4.04	1.475	0.001	0.001	0.001	0.001	0.001	0.001	1.15819	0.0381821	0.0797541	-1.15236	0.0188292	0.103035	-0.806656	0.607522	0.887555	0	1	1	0	1	1	0	1	1	-12.0651	1.94106e-06	1.90467e-05	-11.9801	2.26728e-06	1.8237e-05	-10.5265	0.0420288	0.127048
Zm00001eb021200	20.25	35.1	94.095	222.52	296.125	528.595	35.73	12.9	16.375	120.67	106.525	162.15	3.45794	2.46825e-23	1.32441e-21	3.07666	2.53407e-18	3.70371e-16	2.48997	1.10267e-09	9.36762e-08	1.75586	5.7354e-11	3.48211e-09	3.04575	3.70892e-17	8.79215e-15	3.30776	5.30236e-37	1.72022e-33	-0.882868	0.0135625	0.0481847	-1.47501	5.58015e-06	4.19022e-05	-1.70483	4.53591e-08	7.25583e-07
Zm00001eb021240	16.8	26.245	25.675	45.155	39.91	39.53	23.455	29.375	17.98	49.8	40.14	25.19	1.42642	8.90696e-10	9.46162e-09	0.604708	0.00524768	0.0378931	0.622584	0.0016631	0.0176825	1.08625	1.33684e-06	3.43599e-05	0.450452	0.0780212	0.350954	0.486458	0.0774575	0.406703	0.14126	0.326164	0.549409	0.00829034	0.755272	0.893118	-0.650097	0.00579606	0.025925
Zm00001eb021270	17.31	28.49	30.545	68.425	50.22	28.545	15.605	27.755	25.13	34.345	70.805	37.345	1.98292	1.29254e-16	3.45008e-15	0.817806	0.000352145	0.00400906	-0.0976982	0.780474	0.981259	1.13809	4.26472e-06	9.75518e-05	1.3511	8.68738e-08	4.00942e-06	0.571504	0.0268033	0.207534	-0.994423	0.000241928	0.00149488	0.495589	0.006365	0.0223883	0.387677	0.445896	0.6829
Zm00001eb021300	16.06	36.66	36.33	25.555	24.715	22.91	38.02	28.575	36.375	20.23	36.935	46.71	0.670134	0.0107137	0.0270503	-0.56882	0.0525068	0.217929	-0.665184	0.0948172	0.326905	-0.910262	0.00243769	0.0234779	0.370235	0.17634	0.566985	0.360784	0.115243	0.510415	-0.337109	0.387378	0.612772	0.579602	0.00491006	0.0178569	1.02775	0.0029558	0.0148982
Zm00001eb021310	5.825	17.87	16.65	54.81	72.4	53.505	20.34	15.86	22.705	32.42	35.725	32.62	3.23411	9.98471e-30	9.33748e-28	2.01845	1.94681e-14	1.61691e-12	1.68415	3.34095e-10	3.21671e-08	0.672564	0.0042404	0.0366922	1.17154	0.000170668	0.00309481	0.522747	0.0888061	0.440871	-0.757555	0.00527881	0.0216469	-1.01906	1.156e-05	8.06968e-05	-0.713917	0.00580268	0.0259459
Zm00001eb021350	14.335	33.515	16.255	36.68	27.245	12.065	15.015	15.2	19.245	31.635	20.785	18.055	1.35545	8.68416e-07	5.61053e-06	-0.298815	0.421588	0.775519	-0.430056	0.516084	0.824097	1.07512	7.7266e-05	0.00127558	0.451471	0.183129	0.577352	-0.0920853	0.844234	1	-0.213472	0.686404	0.859819	-0.390449	0.154294	0.30435	0.581571	0.257959	0.480165
Zm00001eb021380	30.92	188.985	149.455	115.395	173.56	152.65	85.53	95.315	63.505	95.4	119.62	73.34	1.89997	2.99579e-14	5.91143e-13	-0.122837	0.880722	1	0.0305164	0.488352	0.810315	0.157559	0.173413	0.498799	0.327683	0.180404	0.571522	0.20773	0.417283	0.894943	-0.27452	0.459628	0.683906	-0.536976	0.013372	0.0421672	-1.05756	0.00053456	0.00348151
Zm00001eb021390	4.925	9.89	9.22	10.06	11.785	9.415	4.805	7.165	3.4	4.575	7.425	5.85	1.03043	0.00605282	0.016448	0.252909	0.336751	0.694691	0.0301943	0.600061	0.884207	-0.0707647	1	1	0.0514243	1	1	0.782902	0.206743	0.680594	-1.13679	0.011509	0.0418508	-0.666489	0.0763167	0.176508	-0.686524	0.0694092	0.188044
Zm00001eb021470	5.245	0.52	28.87	66.75	23.105	108.69	0.001	0.001	0.001	0.001	0.001	0.001	3.66975	3.7647e-12	5.67523e-11	5.47355	1.65633e-14	1.39334e-12	1.91258	6.75716e-05	0.00127105	0	1	1	0	1	1	0	1	1	-16.0265	1.60718e-45	3.35862e-43	-14.4959	8.31485e-19	2.76319e-17	-16.7299	1.23376e-48	1.17286e-45
Zm00001eb021480	0.3	0.35	3.285	0.3	4.82	0.67	7.09	3.805	5.555	17.94	10.35	27.405	0	1	1	3.78361	0.0210055	0.111515	-2.29366	0.137498	0.409127	1.33932	1.4518e-05	0.00028997	1.44366	0.00246178	0.0279953	2.30258	4.67784e-08	3.50892e-06	5.90207	4.12916e-21	1.93096e-19	1.10253	0.146732	0.293014	5.35413	3.17351e-14	1.21543e-12
Zm00001eb021530	2.12	2.69	0.945	2.215	2.665	0.001	2.685	0.84	1.7	2.835	2.145	2.185	0.0632424	1	1	-0.0134706	1	1	-9.88417	0.125077	0.385348	0.0784266	1	1	1.35252	0.267081	0.691669	0.362099	0.855777	1	0.356042	0.599504	0.79651	-0.313158	0.843811	0.949105	11.0934	0.0106545	0.042804
Zm00001eb021540	0.775	2.815	1	2.385	1.035	0.001	0.68	0.001	0.001	0.001	0.001	0.475	1.62172	0.0907096	0.164752	-1.4435	0.146015	0.432033	-9.96578	0.125077	0.385348	-9.40939	0.255681	0.614944	0	1	1	8.89178	0.504623	0.944807	-11.2198	0.000674858	0.00369157	-10.0154	0.0750874	0.174312	8.89178	0.515568	0.742646
Zm00001eb021550	17.145	9.555	7.17	32.005	26.975	21.09	4.815	3.205	4.46	18.9	6.94	8.75	0.900509	0.000599046	0.00214027	1.4973	1.02497e-06	2.28994e-05	1.55651	9.13863e-07	3.30414e-05	1.97278	1.01684e-08	4.20074e-07	1.11461	0.052588	0.273868	0.972239	0.0349914	0.247184	-0.759911	0.00809017	0.0311896	-1.95862	1.29898e-09	1.71413e-08	-1.2692	0.000104044	0.00083948
Zm00001eb021600	56.705	327.935	123.01	121.405	404.085	227.53	256.93	536.28	325.835	313.425	671.31	397.935	1.09828	2.60163e-06	1.54025e-05	0.301249	0.176232	0.486244	0.887281	2.43853e-05	0.000548375	0.286745	0.0473236	0.219042	0.323993	0.205393	0.615119	0.288391	0.22182	0.701683	1.36829	1.83451e-11	3.74591e-10	0.73232	0.000345398	0.00172345	0.806476	0.0175084	0.0638979
Zm00001eb021610	9.52	1.815	1.8	2.725	4.465	4.265	4.035	4.915	4.87	5.34	3.775	7.65	-1.80471	0.000142516	0.000594896	1.29869	0.0366768	0.169171	1.24455	0.0435518	0.196474	0.404271	0.305799	0.673692	-0.380715	0.493909	0.902459	0.651538	0.294154	0.787043	0.970584	0.0542253	0.147256	-0.242184	0.76607	0.899613	0.842914	0.251957	0.472228
Zm00001eb021620	4.995	5.565	4.575	5.24	6.21	3.775	4.87	0.785	4.535	3.325	4.345	3.865	0.0690821	1	1	0.158212	0.71033	0.957555	-0.277295	1	1	-0.550567	0.614568	0.917669	2.46859	0.00437419	0.0441072	-0.230634	0.899911	1	-0.656212	0.397663	0.623328	-0.515237	0.302644	0.494589	0.0339918	1	1
Zm00001eb021630	138.495	82.76	56.145	20.585	72.02	97.61	103.805	207.93	173.74	69.395	130.195	138.565	-2.75017	2.28468e-16	5.88823e-15	-0.200536	0.645067	0.921077	0.797871	0.000164722	0.00266964	-0.580972	0.0705506	0.286721	-0.675424	0.00622614	0.0585477	-0.326367	0.232826	0.716307	1.75324	6.59499e-12	1.41922e-10	0.854205	2.13088e-06	1.72694e-05	0.505462	0.262659	0.485858
Zm00001eb021640	2.065	4.945	2.765	3.02	6.39	4.06	0.885	1.465	1.665	2.325	1.005	3.075	0.548407	0.524494	0.654025	0.369845	0.399741	0.75391	0.5542	0.252798	0.580439	1.39348	0.132536	0.423188	-0.543705	0.753999	1	0.885064	0.374089	0.863015	-0.377318	0.737938	0.895522	-2.66862	4.51671e-05	0.000279464	-0.400893	0.518562	0.743424
Zm00001eb021650	34.265	123.465	66.315	36.225	58.555	91.805	22.955	44.965	33.645	38.42	35.98	41.355	0.08025	0.890806	0.953668	-1.07624	0.000391945	0.00438958	0.469237	0.0135412	0.0866821	0.743049	0.00106675	0.0118968	-0.321607	0.18493	0.580293	0.29767	0.215507	0.695333	0.0848718	0.465311	0.6888	-0.702597	0.00442161	0.0163063	-1.15051	5.33299e-06	5.82016e-05
Zm00001eb021660	0.001	0.001	0.001	0.001	0.001	0.001	3.46	6.04	5.14	4.355	3.98	4.645	0	1	1	0	1	1	0	1	1	0.331901	0.509461	0.85315	-0.60178	0.266428	0.691669	-0.14609	0.878342	1	12.0885	1.17528e-06	1.20313e-05	11.9586	2.21447e-06	1.78551e-05	12.1815	2.32149e-05	0.000223
Zm00001eb021690	10.585	4.22	4.715	2.755	4.795	7.79	81.78	107.85	51.445	68.86	85.965	71.75	-1.9419	2.0759e-06	1.24963e-05	0.184288	0.665934	0.932955	0.724366	0.0882747	0.312301	-0.248082	0.706394	0.962389	-0.327205	0.163629	0.543196	0.479948	0.0538411	0.326952	4.64354	9.11705e-36	1.02038e-33	4.16415	5.33407e-40	6.49423e-38	3.20328	1.9183e-18	1.17113e-16
Zm00001eb021700	4.24	1.655	1.57	1.185	1.635	3.18	5.395	4.53	4.025	7.195	4.785	4.95	-1.83918	0.00402293	0.0115865	-0.0175406	1	1	1.01826	0.167485	0.461468	0.415372	0.263693	0.625361	0.0790079	1	1	0.29844	0.647138	1	2.60211	4.59858e-05	0.000341402	1.54923	0.0625278	0.150842	0.638402	0.550764	0.770861
Zm00001eb021710	1.05	2.565	0.001	3.145	3.32	1.745	8.36	3.995	5.715	2.69	4.035	3.37	1.58267	0.0297271	0.0645228	0.372224	0.472391	0.814037	10.769	0.0156589	0.096107	-1.6359	0.00363666	0.0325408	0.0143732	1	1	-0.762005	0.259361	0.750022	-0.225454	1	1	0.281385	0.545457	0.73182	0.949522	0.426184	0.664334
Zm00001eb021720	94.09	35.545	93.495	73.015	59.645	153.365	3.34	0.001	1.32	3	0.78	6.12	-0.365849	0.282308	0.407803	0.746755	0.0265157	0.132639	0.714008	0.00316688	0.0290905	-0.154886	1	1	9.60733	0.250056	0.673115	2.21299	0.00504151	0.0617787	-4.60516	8.22131e-40	1.2017e-37	-6.25678	2.07448e-44	3.28787e-42	-4.64729	7.31595e-30	1.1947e-27
Zm00001eb021790	7.61	24.575	13.635	21.33	39.625	14.325	7.925	43.855	12.535	39.135	122.25	39.265	1.48692	7.46049e-07	4.88016e-06	0.68922	0.0165207	0.0933507	0.0712204	0.517996	0.825543	2.30398	1.17144e-11	8.139e-10	1.47902	1.28484e-07	5.71733e-06	1.64728	9.07665e-06	0.000349518	0.875575	0.00144034	0.00707968	1.62535	8.8842e-13	1.71567e-11	1.45471	0.00216848	0.011448
Zm00001eb021800	0.8	1.805	1.515	2.6	1.945	0.365	10.375	7.145	4.635	7.845	14.825	5.06	1.70044	0.0521256	0.103701	0.107771	1	1	-2.05335	0.289266	0.621032	-0.403266	0.646101	0.932535	1.05303	0.0368012	0.215235	0.126568	1	1	1.59326	0.00605242	0.024316	2.93019	2.9831e-11	4.79605e-10	3.79317	0.000790664	0.00488644
Zm00001eb021810	1.065	2.33	2.01	3.455	2.585	0.485	0.001	1.175	2.275	2.23	0.001	6.71	1.69783	0.0152643	0.0366257	0.149834	0.837358	1	-2.05114	0.111845	0.364078	11.1228	0.0175676	0.108917	-10.1984	0.137533	0.493166	1.56045	0.0414059	0.274987	-0.631642	0.542564	0.753063	-11.3359	0.000275526	0.00141514	3.79026	6.94241e-05	0.000589264
Zm00001eb021840	0.6	0.001	0.001	0.001	1.01	0.96	1.81	0.89	0.88	2.53	3.22	1.595	-9.22882	0.130477	0.221251	9.98014	0.065101	0.253826	9.90689	0.125077	0.385348	0.483148	0.503775	0.84991	1.85518	0.0491835	0.262057	0.857981	0.771638	1	11.3049	0.000318092	0.00189587	1.67271	0.0185595	0.0555189	0.73245	0.782788	0.936545
Zm00001eb021850	0.001	0.001	0.001	0.001	0.001	0.001	9.355	10.715	11.185	9.86	9.35	7.32	0	1	1	0	1	1	0	1	1	0.07585	0.637743	0.927823	-0.196594	0.596606	0.962763	-0.61165	0.0996908	0.469919	13.2674	5.96381e-13	1.43201e-11	13.1908	1.11091e-13	2.37476e-12	12.8376	4.3109e-08	6.9292e-07
Zm00001eb021880	8.385	21.055	22.54	31.05	34.415	23.51	12.095	5.215	11.745	14.635	17.445	11.57	1.88871	5.17005e-11	6.57252e-10	0.708875	0.00256907	0.0212293	0.060787	0.392859	0.727105	0.275012	0.38255	0.75615	1.74207	9.00429e-06	0.000246376	-0.0216578	1	1	-1.08517	0.00539472	0.0220617	-0.980224	0.000109748	0.000620169	-1.02289	0.000772574	0.00479021
Zm00001eb021930	1.065	1.11	0.81	3.63	3.585	3.48	33.51	30.94	22.51	50.37	59.725	59.25	1.76912	0.0106033	0.0268077	1.69141	0.0204693	0.109311	2.10309	0.00783934	0.0572126	0.587973	0.0113255	0.0785617	0.948862	0.000116342	0.00224389	1.39625	3.15826e-08	2.48392e-06	3.79452	2.20973e-31	1.93164e-29	4.05829	5.87567e-43	8.64724e-41	4.08966	2.15075e-23	2.02292e-21
Zm00001eb021970	2.42	2.36	3.095	0.69	1.315	2.505	4.615	2.48	3.605	2.225	3.745	8.46	-1.81034	0.0281131	0.0615451	-0.843724	0.471732	0.813763	-0.305129	1	1	-1.05253	0.169106	0.49048	0.594626	0.431677	0.862493	1.23066	0.0147545	0.136471	1.68914	0.0770117	0.192941	1.5099	0.0352336	0.0950071	1.75585	0.00564003	0.0253935
Zm00001eb021980	0.77	2.085	1.705	1	1.61	2.46	3.86	2.605	5.27	3.005	5.3	12.35	0.37707	1	1	-0.372987	1	1	0.528887	0.48294	0.8055	-0.361236	0.865777	1	1.02471	0.116176	0.450535	1.22864	0.00193176	0.0297548	1.58736	0.0581694	0.155504	1.71893	0.00298928	0.0116142	2.32778	0.000106061	0.000853171
Zm00001eb021990	2.6	4.825	3.52	6.89	10.84	3.24	5.255	4.815	7.33	14.935	17.165	11.55	1.40599	0.00828916	0.0216792	1.16776	0.00387644	0.0297493	-0.119582	1	1	1.50693	2.464e-05	0.000468719	1.83386	1.19961e-05	0.000315651	0.656008	0.118697	0.518369	1.11612	0.000897281	0.00473951	0.663105	0.02305	0.0666877	1.83383	0.00199197	0.0106642
Zm00001eb022010	0.001	0.001	0.001	0.001	0.001	0.001	1.37	2.525	1.5	0.795	2.155	1.985	0	1	1	0	1	1	0	1	1	-0.785149	0.756991	0.986145	-0.228596	0.825407	1	0.404177	0.797081	1	9.63481	0.132955	0.291055	11.0735	0.00132721	0.00571623	10.9549	0.0132084	0.050836
Zm00001eb022020	0.001	0.001	3.53	0.001	0.001	0.001	19.32	23.595	24.175	14.325	12.545	14.36	0	1	1	0	1	1	-11.7855	0.0101359	0.0701899	-0.43156	0.373207	0.74794	-0.911369	0.00184985	0.0220966	-0.75146	0.011857	0.117054	13.8062	6.55674e-19	2.68997e-17	13.6148	1.56309e-17	4.73614e-16	13.8098	1.04489e-13	3.74838e-12
Zm00001eb022030	13.895	16.715	9.05	59.015	83.545	30.24	10.845	7.1	17.43	51.32	36.45	50.16	2.08652	1.39608e-08	1.22961e-07	2.32141	2.44224e-15	2.26574e-13	1.74047	3.60316e-06	0.000106683	2.24249	1.19555e-06	3.10975e-05	2.36003	7.32856e-11	6.14468e-09	1.52496	5.39287e-08	4.0105e-06	-0.201561	0.801106	0.935183	-1.19663	3.26335e-05	0.000207919	0.730079	0.0996597	0.243863
Zm00001eb022050	27.66	56.095	25.755	35.45	37.46	12.805	42.37	30.245	41.415	39.52	44.72	43.25	0.357984	0.159699	0.2603	-0.582521	0.0640487	0.25092	-1.00815	0.0231558	0.127834	-0.10046	0.88794	1	0.564224	0.0296898	0.185302	0.0625467	0.793995	1	0.156797	0.288639	0.507381	0.255569	0.143082	0.287672	1.75599	5.61129e-06	6.10386e-05
Zm00001eb022090	1.735	8.165	9.01	8.12	8.95	6.665	7.99	8.81	8.885	8.285	6.105	9.79	2.22654	3.23319e-05	0.000155029	0.132435	0.639008	0.918253	-0.434922	0.643078	0.908805	0.0523062	0.670864	0.945844	-0.529151	0.209351	0.621756	0.139937	0.831006	1	0.029022	0.792489	0.930852	-0.551896	0.24547	0.426555	0.554704	0.43633	0.674149
Zm00001eb022150	44.53	158.825	203.015	152.04	144	118.18	0.001	0.001	0.001	0.001	1.995	0.001	1.7716	1.09794e-16	2.95473e-15	-0.141369	0.81861	1	-0.7806	0.0355646	0.172778	0	1	1	10.9622	0.0261488	0.169874	0	1	1	-17.2141	1.73108e-78	3.85872e-75	-6.17354	3.40713e-70	3.1469e-67	-16.8506	9.1626e-48	8.12967e-45
Zm00001eb022160	4.76	15.615	17.38	16.39	15.085	13.04	9.615	10.99	10.58	10.165	11.495	11.04	1.78378	1.52176e-07	1.13493e-06	-0.0498179	0.944591	1	-0.414484	0.538739	0.84129	0.0802515	0.570149	0.893365	0.0648151	1	1	0.0614005	0.921983	1	-0.689206	0.070464	0.180471	-0.392108	0.264931	0.450464	-0.240204	0.316659	0.549611
Zm00001eb022180	18.02	12.555	12.01	8.705	9.14	8.135	15.505	18.97	20.48	15.26	13.555	14.015	-1.04968	0.000840116	0.00290179	-0.457996	0.301905	0.656562	-0.562022	0.323755	0.661193	-0.0229786	0.726411	0.971522	-0.484895	0.105816	0.425747	-0.547244	0.0842317	0.428237	0.809839	0.0118049	0.0427697	0.568559	0.0471803	0.120069	0.784757	0.151729	0.330582
Zm00001eb022190	11.165	15.565	18.36	10.175	13.385	16.255	1.145	0.425	1.545	1.11	1.375	1.435	-0.133954	0.663304	0.776806	-0.217688	0.78783	0.991579	-0.175683	1	1	-0.0447879	1	1	1.6939	0.453248	0.875314	-0.106556	1	1	-3.1964	4.2907e-08	5.62056e-07	-3.28311	4.04851e-11	6.34891e-10	-3.50176	2.45282e-11	6.51589e-10
Zm00001eb022210	0.001	0.001	0.001	0.001	0.001	0.001	1.34	1.475	0.25	2.14	1.75	1.955	0	1	1	0	1	1	0	1	1	0.675378	0.456912	0.816055	0.24664	1	1	2.96717	0.041601	0.275718	11.0634	0.00152321	0.00743237	10.7731	0.00420306	0.0156078	10.933	0.0115707	0.045601
Zm00001eb022380	1.97	3.27	1.835	1.015	0.305	0.001	10.945	1.255	3.975	0.985	1.245	3.75	-0.956716	0.287748	0.414073	-3.42241	0.00123282	0.0115189	-10.8416	0.0165984	0.100347	-3.474	8.13725e-09	3.41042e-07	-0.0115416	1	1	-0.0840643	1	1	-0.0432841	1	1	2.02926	0.127798	0.263496	11.8727	0.000399667	0.0027104
Zm00001eb022390	0.65	0.265	0.38	8.255	3.495	1.515	0.001	0.001	0.001	28.11	10.545	4.875	3.66676	4.2822e-08	3.50623e-07	3.72123	0.000254878	0.00301588	1.99525	0.18773	0.492964	14.7788	6.58966e-22	1.64647e-19	13.3643	3.14569e-08	1.58048e-06	12.2512	0.000180792	0.00431671	1.76774	3.32567e-06	3.13565e-05	1.59319	0.00152771	0.00646644	1.68608	0.172995	0.36387
Zm00001eb022580	2.01	2.675	1.925	3.74	2.435	0.945	10.615	8.915	8.005	8.835	7.265	7.445	0.895843	0.143877	0.239369	-0.135617	1	1	-1.02647	0.549561	0.847455	-0.264802	0.775476	0.993921	-0.295272	0.470968	0.88903	-0.10463	0.910647	1	1.24019	0.00304325	0.0135493	1.57704	0.00195483	0.00806161	2.97789	6.4882e-05	0.000554747
Zm00001eb022640	4.41	1.5	1.85	1.3	2.585	1.22	3.645	3.82	4.455	3.045	3.79	3.86	-1.76227	0.00455536	0.0129079	0.785202	0.373411	0.730216	-0.600644	0.774554	0.978364	-0.259477	1	1	-0.0113748	1	1	-0.206825	0.869222	1	1.22793	0.0609333	0.161425	0.552034	0.389619	0.587444	1.66172	0.0566165	0.160355
Zm00001eb022660	8.15	2.195	2.375	4.605	1.885	2.685	4.605	5.71	2.87	8.275	4.985	2.71	-0.823599	0.0352346	0.0744827	-0.219656	1	1	0.176995	0.834162	1	0.845558	0.0301733	0.160936	-0.195897	0.76889	1	-0.0827579	1	1	0.845558	0.0255741	0.0807748	1.40303	0.00756237	0.0259723	0.0133708	0.862552	0.980961
Zm00001eb022710	5.395	3.075	1.2	1.085	0.195	0.001	34.395	36.04	5.67	26.165	11.03	2.49	-2.31393	0.000197202	0.000794908	-3.97904	0.00343742	0.027014	-10.2288	0.0628465	0.251918	-0.394561	0.340566	0.713851	-1.70817	1.23778e-05	0.000324712	-1.1872	0.0536365	0.326167	4.59187	2.8698e-21	1.34911e-19	5.82181	1.43698e-14	3.31807e-13	11.2819	0.00306486	0.0152895
Zm00001eb022720	2.425	4.27	2.885	6.105	3.49	2.535	4.35	3.575	2.52	3.725	3.945	2.545	1.33201	0.00495296	0.0138724	-0.291009	0.748017	0.976006	-0.186586	1	1	-0.223775	1	1	0.142082	1	1	0.0142419	1	1	-0.712751	0.19032	0.379151	0.176798	0.750006	0.889008	0.00567991	1	1
Zm00001eb022730	5.4	35.835	21.45	4.485	11.695	0.275	6.725	1.735	12.035	0.48	0.28	0.001	-0.267851	0.522999	0.652782	-1.61548	3.01708e-08	9.50998e-07	-6.2854	1.08256e-17	6.39595e-15	-3.80843	2.49477e-06	6.00245e-05	-2.63144	0.125098	0.467948	-13.5549	1.75257e-12	3.03242e-10	-3.224	0.000651109	0.00358143	-5.38432	7.53806e-13	1.4727e-11	-8.10329	1	1
Zm00001eb022750	9.845	11.875	13.39	11.13	10.625	8.685	2.08	3.27	2.535	2.135	5.505	4.585	0.17699	0.717812	0.820925	-0.160465	0.863728	1	-0.624558	0.280362	0.613524	0.0376525	1	1	0.751452	0.269767	0.694967	0.854936	0.349839	0.842265	-2.38215	2.3314e-06	2.25217e-05	-0.948648	0.0221159	0.0644922	-0.921604	0.100161	0.244685
Zm00001eb022760	7.44	12.84	6.605	10.17	8.11	5.925	54.805	52.465	57.83	71.83	49.845	45.77	0.450945	0.302739	0.43071	-0.662871	0.109149	0.358919	-0.156743	1	1	0.390279	0.0255547	0.142989	-0.0739065	0.689217	1	-0.337416	0.151071	0.58364	2.82027	1.1612e-22	5.98475e-21	2.61967	2.36906e-25	1.26405e-23	2.94952	3.8999e-13	1.31903e-11
Zm00001eb022780	1.01	3.175	3.535	1.25	1.49	2.725	4.74	5.15	6.015	4.575	3.69	3.22	0.307573	0.796171	0.882631	-1.09144	0.207056	0.533784	-0.375454	1	1	-0.0511153	0.885034	1	-0.480952	0.401991	0.834979	-0.901504	0.117189	0.514803	1.87184	0.00335795	0.0147733	1.30831	0.0419016	0.109326	0.240804	1	1
Zm00001eb022810	14.395	7.84	13.57	12.17	17.65	12.28	5.13	3.345	6.715	6.3	6.75	13.16	-0.242239	0.498865	0.631879	1.17074	0.000521013	0.00561167	-0.14411	0.93765	1	0.296393	0.477016	0.834439	1.01288	0.0776249	0.350089	0.9707	0.0103479	0.106322	-0.949905	0.0258388	0.0814472	-1.38671	9.54482e-05	0.000545578	0.0998489	0.943557	1
Zm00001eb022850	0.001	0.001	0.001	6.37	2.215	0.001	0.001	0.001	0.001	1.39	4.34	0.47	12.6371	4.43194e-08	3.62091e-07	11.1131	0.0013158	0.0121083	0	1	1	10.4409	0.0156501	0.100066	12.0835	5.02534e-05	0.00108478	8.87652	0.50476	0.944807	-2.19621	0.00252512	0.0115362	0.970388	0.143446	0.288216	8.87652	0.515574	0.742646
Zm00001eb022860	1.2	0.805	0.965	4.435	1.96	1.045	9.315	3.135	7.11	12.875	4.77	14.66	1.8859	0.00358026	0.0104712	1.28379	0.272155	0.621573	0.114902	1	1	0.466945	0.0980719	0.352086	0.605524	0.402897	0.83606	1.04396	0.00459682	0.057469	1.53757	2.86563e-05	0.000222893	1.28314	0.0240527	0.0690407	3.81031	7.33497e-09	1.34743e-07
Zm00001eb022880	36.11	39.535	47.26	59	61.35	46.32	16.56	13.755	18.31	37.625	43.8	28.525	0.708317	0.00500717	0.0140021	0.633933	0.00417999	0.0315969	-0.0289844	0.533421	0.836863	1.18399	3.22234e-05	0.000595114	1.67097	3.32242e-09	2.00545e-07	0.639595	0.0640122	0.362666	-0.649023	0.0601413	0.159706	-0.486132	0.0543672	0.134923	-0.699408	0.00869801	0.0361191
Zm00001eb022890	107.09	51.88	83.155	119.61	20.405	45.915	58.84	33.515	18.02	20.97	16.74	10.735	0.159514	0.541109	0.66923	-1.34626	3.88707e-05	0.000597445	-0.856837	0.0138037	0.0879294	-1.48847	5.97858e-05	0.00102543	-1.00151	0.000171725	0.00310966	-0.747277	0.0222696	0.18233	-2.51194	4.50263e-23	2.45297e-21	-0.285623	0.475134	0.669391	-2.09664	2.44265e-11	6.49535e-10
Zm00001eb022920	23.17	3.885	4.025	5.62	4.53	6.14	2.57	2.86	3.945	5.18	3.665	5.985	-2.04362	5.04504e-10	5.57167e-09	0.221596	0.647429	0.922652	0.60925	0.126851	0.388746	1.01118	0.0453911	0.212367	0.357798	0.845531	1	0.601326	0.296407	0.789581	-0.117618	1	1	-0.305698	0.764754	0.898881	-0.0368874	0.809124	0.95016
Zm00001eb022940	45.805	47.665	47.28	79.085	60.84	57.715	34.93	33.915	36.725	38.07	37.14	43.805	0.787899	0.00050931	0.0018479	0.35209	0.0660989	0.255962	0.287716	0.0759768	0.283941	0.124188	0.278462	0.643299	0.13105	0.70865	1	0.254333	0.30568	0.798013	-1.05475	6.26782e-05	0.000449485	-0.712046	0.00143784	0.00612868	-0.397851	0.0524322	0.150685
Zm00001eb022990	1.585	1.875	2.1	5.14	5.48	5.135	1.675	2.22	2.93	10.805	2.16	4.03	1.69729	0.00340327	0.00999981	1.54729	0.0103309	0.0643364	1.28997	0.0162862	0.0988041	2.68947	3.77289e-08	1.36354e-06	-0.0395284	1	1	0.459879	0.591152	0.985151	1.07186	0.00295416	0.0132098	-1.34314	0.0195447	0.0579996	-0.349584	0.388775	0.628013
Zm00001eb023010	23.255	43.125	35.565	49.52	39.86	41.16	34.715	26.54	28.655	39.295	33.62	35.515	1.09047	1.47426e-06	9.09601e-06	-0.113583	0.930183	1	0.210785	0.119236	0.377502	0.178787	0.19044	0.526389	0.341151	0.205508	0.615391	0.309642	0.233583	0.717476	-0.333666	0.313062	0.534771	-0.245622	0.388646	0.586472	-0.212814	0.198096	0.400343
Zm00001eb023020	2.29	4.465	4.025	2.9	2.855	2.44	18.615	15.71	21.165	21.815	17.325	15.95	0.340705	0.734253	0.834305	-0.645169	0.326586	0.68294	-0.722108	0.424959	0.757156	0.228855	0.192995	0.530461	0.141172	0.779265	1	-0.408124	0.186524	0.648486	2.9112	5.66135e-15	1.66596e-13	2.60129	2.54487e-12	4.62759e-11	2.7086	3.61411e-07	4.93589e-06
Zm00001eb023030	0.001	0.001	0.001	0.001	0.001	0.001	14.755	8.27	10.11	9.565	11.035	10.37	0	1	1	0	1	1	0	1	1	-0.625367	0.162233	0.477664	0.416127	0.347917	0.784671	0.0366329	1	1	13.2235	3.97956e-13	9.76598e-12	13.4298	2.65109e-15	6.55674e-14	13.3401	2.05218e-09	4.13511e-08
Zm00001eb023070	575.37	1047.94	233.23	121.275	228.165	11.505	206.535	52.07	116.765	34.3	76.96	28.705	-2.24621	2.17562e-16	5.61981e-15	-2.19941	2.00649e-09	7.89382e-08	-4.34142	4.54771e-17	1.97037e-14	-2.59011	1.06805e-07	3.52199e-06	0.563656	0.0236571	0.157489	-2.02423	0.0536128	0.3261	-1.822	0.000347404	0.0020473	-1.5679	9.78961e-16	2.51164e-14	1.31904	0.340082	0.577241
Zm00001eb023130	1.935	2.03	0.98	1.105	2.375	1.495	0.001	0.001	0.27	0.55	0.305	0.77	-0.808287	0.37731	0.510932	0.226448	0.830142	1	0.609292	0.754033	0.968808	9.10329	0.250057	0.60841	8.25267	1	1	1.5119	0.628249	0.999434	-1.00654	0.732707	0.892784	-2.96105	0.0140587	0.0440266	-0.957215	0.527363	0.751359
Zm00001eb023170	8.565	6.1	4.735	4.21	4.785	3.26	4.1	3.56	5.56	3.665	4.065	5.985	-1.02463	0.00664226	0.0178754	-0.35029	0.705231	0.954488	-0.538492	0.597226	0.881729	-0.161811	1	1	0.191378	0.859172	1	0.106266	0.88795	1	-0.200007	1	1	-0.235264	0.785162	0.912893	0.876479	0.241603	0.460125
Zm00001eb023200	0.575	0.001	0.001	0.001	0.001	0.001	4.835	3.01	6.455	5.705	6.745	6.63	-9.16742	0.131002	0.221781	0	1	1	0	1	1	0.238711	0.501381	0.84991	1.16405	0.0448692	0.246525	0.0385918	1	1	12.478	1.32897e-08	1.87789e-07	12.7196	3.13974e-10	4.44023e-09	12.6948	2.14824e-07	3.04159e-06
Zm00001eb023230	4.775	7.275	8.18	17.42	19.505	9.69	9.4	10.67	9.19	10.815	12.84	19.29	1.86717	1.8738e-07	1.37631e-06	1.42282	8.0919e-06	0.000146607	0.244396	0.30112	0.635361	0.202301	0.350024	0.7226	0.267085	0.591104	0.959096	1.06972	0.000863096	0.0157641	-0.687711	0.0606621	0.16085	-0.603199	0.0490799	0.124031	0.993285	0.0292256	0.0959102
Zm00001eb023250	5.07	5.095	6.865	10.44	8.035	5.045	1.71	1.525	2.49	2.455	2.455	1.55	1.04206	0.0300779	0.0651979	0.657216	0.113562	0.368473	-0.444405	0.735856	0.961658	0.521727	0.359636	0.732811	0.686914	0.454773	0.875314	-0.683878	0.534684	0.957903	-2.08833	1.88289e-05	0.000152623	-1.71057	0.00104393	0.00463863	-1.70259	0.0564327	0.159903
Zm00001eb023290	38.89	50.395	45.975	35.31	36.805	29.455	23.54	22.005	23.795	16.88	28.56	32.84	-0.139322	0.4876	0.621214	-0.453379	0.133832	0.408279	-0.642337	0.0973019	0.332736	-0.479799	0.236182	0.592964	0.376165	0.214266	0.62827	0.464796	0.09847	0.466537	-1.06476	0.000150566	0.000984474	-0.365906	0.205993	0.37781	0.156942	1	1
Zm00001eb023300	0.001	0.285	0.001	0.001	0.001	0.265	33.145	30.52	30.925	20.595	26.395	19.865	0	1	1	-8.15482	1	1	8.04985	1	1	-0.686497	0.074923	0.297903	-0.20949	0.41249	0.844726	-0.638545	0.0191099	0.163231	14.33	1.86553e-23	1.04614e-21	14.688	1.26501e-34	1.20153e-32	6.22809	5.92432e-16	2.73773e-14
Zm00001eb023310	0.001	0.001	0.001	0.001	0.33	0.001	30.155	34.615	30.54	26.23	28.865	21.65	0	1	1	8.36632	0.503386	0.834965	0	1	1	-0.201179	0.865544	1	-0.262076	0.296078	0.72616	-0.496333	0.0793846	0.41331	14.6789	4.66411e-29	3.70209e-27	6.45071	1.16134e-33	1.0509e-31	14.4021	8.0427e-18	4.61381e-16
Zm00001eb023330	2.91	23.535	10.785	4.12	9.51	1.9	4.53	2.42	6.07	2.9	2.72	1.185	0.501625	0.396994	0.532083	-1.30729	0.000233427	0.00280649	-2.50495	7.73887e-06	0.000203433	-0.643458	0.402726	0.770776	0.1686	1	1	-2.35681	0.00387769	0.05065	-0.506591	0.529279	0.741589	-1.80584	0.000163825	0.000893333	-0.681112	0.643183	0.839739
Zm00001eb023360	65.585	80.32	30.215	87.68	58.385	13.395	64.74	36.79	31.855	31.435	56.245	37.32	0.418882	0.109287	0.191943	-0.460162	0.330747	0.688384	-1.17357	0.00283252	0.0266212	-1.04229	0.010026	0.071652	0.612411	0.0571444	0.290298	0.228429	0.654148	1	-1.47988	8.83096e-05	0.000610702	-0.0538729	1	1	1.47825	0.0225312	0.0778471
Zm00001eb023380	1.995	1.76	1.79	2.115	1.655	0.83	0.001	0.001	0.001	0.001	0.001	0.001	0.0842689	1	1	-0.0887442	1	1	-1.10878	0.549061	0.846985	0	1	1	0	1	1	0	1	1	-11.0464	0.00239732	0.0110505	-10.6926	0.00916035	0.030544	-9.69697	0.138518	0.310945
Zm00001eb023400	9.505	63.36	8.67	36.04	27.7	2.775	29.385	14.315	7.815	19.52	22.375	9.07	1.92284	0.00018687	0.000758165	-1.19369	0.00847791	0.0548193	-1.64354	0.00733706	0.0551096	-0.590127	0.395386	0.763728	0.64436	0.133508	0.486156	0.214857	0.683541	1	-0.884646	0.199199	0.390618	-0.307998	0.35106	0.546751	1.70861	0.0285359	0.0941927
Zm00001eb023410	1.07	4.82	3.01	4.06	3.295	2.045	0.001	0.001	0.001	0.001	0.001	0.001	1.92387	0.00314639	0.00932731	-0.548755	0.43209	0.783344	-0.557663	0.823985	1	0	1	1	0	1	1	0	1	1	-11.9873	4.4933e-06	4.13881e-05	-11.6861	3.58184e-05	0.000226326	-10.9979	0.00618082	0.0273097
Zm00001eb023420	36.165	23.355	8.74	10.97	25.79	3.305	38.14	24.28	3.945	4.485	23.53	5.535	-1.72103	0.000311198	0.00119417	0.14308	0.579518	0.885644	-1.40298	0.0402583	0.187119	-3.08812	4.86073e-07	1.39411e-05	-0.0452671	0.882159	1	0.488558	0.556855	0.969829	-1.29038	0.0088146	0.0336351	-0.13231	0.82479	0.938927	0.743933	0.4485	0.685117
Zm00001eb023460	84.935	25.35	25.59	14.8	20.585	3.11	50.43	66.92	27.375	9.885	34.895	21.99	-2.52076	3.31806e-09	3.21909e-08	-0.300392	0.543226	0.862057	-3.04059	2.32655e-11	2.89382e-09	-2.35097	1.81989e-13	1.67102e-11	-0.939417	0.189143	0.586328	-0.316011	0.59002	0.984592	-0.582284	0.207284	0.402463	0.761427	0.00424792	0.0157613	2.82186	0.000351311	0.00241571
Zm00001eb023540	13.565	17.52	16.42	22.875	21.655	27.19	9.04	6.66	5.32	11.49	6.155	7.365	0.753883	0.00561255	0.0154261	0.305697	0.168189	0.473017	0.727622	0.00519542	0.0425252	0.345984	0.193796	0.531818	-0.113763	0.892806	1	0.469259	0.287342	0.78045	-0.993393	0.001711	0.00824019	-1.81487	1.17392e-08	1.36001e-07	-1.88432	4.3343e-07	5.85637e-06
Zm00001eb023570	11.725	201.52	82.245	107.725	118.18	13.44	43.82	22.55	31.32	8.375	22.39	20.245	3.19969	3.96625e-29	3.54459e-27	-0.769937	0.018454	0.101369	-2.61339	1.40994e-08	9.02779e-07	-2.38743	4.10626e-11	2.54795e-09	-0.0102729	0.953322	1	-0.629519	0.450539	0.920441	-3.68512	3.48678e-25	2.27482e-23	-2.40006	4.74313e-16	1.26918e-14	0.591033	0.615027	0.820715
Zm00001eb023600	28.59	165.21	21.575	8.835	9.82	3.48	64.22	324.175	118.145	13.61	25.41	5.695	-1.69421	2.81231e-05	0.000136371	-4.07243	7.23384e-40	1.0514e-36	-2.6322	1.15186e-07	5.45422e-06	-2.23836	2.34303e-08	8.88812e-07	-3.6733	1.89133e-19	6.08867e-17	-4.37472	1.11682e-26	1.20775e-23	0.623365	0.0495911	0.136994	1.3716	1.2434e-07	1.24503e-06	0.710609	0.500391	0.731848
Zm00001eb023620	2.64	4.5	4.355	9.265	8.155	3.605	4.475	2.065	3.395	10.26	14.595	7.53	1.81125	0.00153894	0.00496699	0.85776	0.0594401	0.237997	-0.272673	1	1	1.19707	0.00156531	0.0162091	2.82126	1.56691e-07	6.78717e-06	1.14924	0.0282776	0.215858	0.147168	0.644947	0.831003	0.839717	0.0117843	0.0379425	1.06265	0.121396	0.282162
Zm00001eb023680	1.695	3.045	2.835	5.06	4.085	3.32	2.58	2.02	3.515	13.735	3.98	8.58	1.57785	0.0059413	0.0161954	0.423894	0.506533	0.836664	0.227835	0.690422	0.936385	2.41241	5.74867e-08	2.01049e-06	0.978413	0.23272	0.654698	1.28745	0.0111049	0.111755	1.44065	0.000152545	0.000996198	-0.0375676	1	1	1.36979	0.0259587	0.0872876
Zm00001eb023690	7.73	10.345	7.23	8.795	6.07	1.635	4.435	3.72	3.85	3.845	3.88	3.81	0.186215	0.733035	0.833385	-0.769165	0.17072	0.47733	-2.14471	0.000838101	0.0103502	-0.205951	1	1	0.060754	1	1	-0.0150674	1	1	-1.1937	0.0318743	0.0967112	-0.64564	0.250115	0.43241	1.2205	0.193729	0.394181
Zm00001eb023730	3.035	3.615	3.355	4.285	4.025	1.28	11.205	6.64	7.635	5.705	4.505	5.795	0.497599	0.434078	0.569742	0.154993	0.754872	0.979642	-1.39017	0.143814	0.419736	-0.973844	0.0703134	0.286356	-0.559656	0.236011	0.659359	-0.397819	0.388921	0.871688	0.412932	0.35819	0.584185	0.162538	0.772812	0.904717	2.17866	0.00710829	0.0306361
Zm00001eb023770	3.725	8.015	8.895	9.25	10.57	11.345	4.65	4.89	5.015	6.915	3.985	6.88	1.31221	0.000880839	0.00302647	0.399201	0.238679	0.580974	0.35099	0.175678	0.475284	0.572499	0.124197	0.408229	-0.295255	0.614679	0.970139	0.456159	0.348381	0.84134	-0.419724	0.430276	0.655164	-1.40732	0.00146056	0.00621169	-0.721576	0.0528649	0.151682
Zm00001eb023810	52.895	26.115	27.775	25.87	29.94	34.92	29.47	30.655	32.06	30.45	35.55	34.2	-1.03185	1.95677e-06	1.18251e-05	0.197196	0.271045	0.620608	0.330267	0.0461209	0.205371	0.0471952	0.503969	0.850057	0.213727	0.451715	0.875314	0.0932219	0.759986	1	0.235162	0.227434	0.43076	0.247775	0.168897	0.325976	-0.0300572	0.541521	0.763339
Zm00001eb023820	734.865	272.675	225.145	190.355	210.315	128.4	146.5	96.41	135.41	118.965	136.225	145.7	-1.94879	1.17102e-24	7.04902e-23	-0.374631	0.196209	0.517617	-0.810209	0.016761	0.101154	-0.300363	0.574653	0.896296	0.498737	0.0450182	0.247188	0.105667	0.654787	1	-0.678155	0.0344952	0.103154	-0.62656	0.00173619	0.00725037	0.182356	0.92692	1
Zm00001eb023840	13.15	34.3	14.495	17.61	12.325	6.21	21.4	9.145	21.985	11.165	10.63	13.77	0.421332	0.221	0.337447	-1.47662	0.000818852	0.00816729	-1.22289	0.0104553	0.0718548	-0.938628	0.0100852	0.0719755	0.217087	0.672085	1	-0.674991	0.0517559	0.318623	-0.657412	0.0799348	0.19863	-0.213446	0.704558	0.855014	1.14886	0.0558987	0.158812
Zm00001eb023850	5.07	11.885	5.03	3.61	3.455	1.595	4.335	2.275	5.365	3.075	1.575	2.505	-0.489987	0.282079	0.407539	-1.78238	0.000665906	0.00685074	-1.657	0.0435518	0.196474	-0.495446	0.603401	0.912999	-0.530515	0.607445	0.966486	-1.09877	0.063964	0.362553	-0.231412	1	1	-1.13333	0.118062	0.248416	0.651254	0.67407	0.862449
Zm00001eb023950	34.74	121.98	177.345	130.945	137.91	183.21	31.725	90.9	113.34	73.635	21.78	89.865	1.91429	2.13075e-10	2.49636e-09	0.177082	0.298513	0.65304	0.0469396	0.489359	0.811261	1.21477	8.54727e-05	0.00139686	-2.06128	2.23252e-16	4.65721e-14	-0.334826	0.317965	0.809224	-0.830497	0.0129965	0.0465377	-2.66265	4.87979e-26	2.71736e-24	-1.02767	0.00766333	0.0325435
Zm00001eb024020	0.635	1.265	1.1	4.215	5.91	6.82	1.33	1.135	1.865	5.43	2.71	3.555	2.7307	7.40019e-05	0.000328709	2.22402	0.000357804	0.00406464	2.63227	0.000274687	0.00410625	2.02953	0.00111085	0.0122734	1.2556	0.210388	0.621756	0.930674	0.292301	0.785259	0.36542	0.378953	0.604917	-1.12487	0.0396962	0.104683	-0.939922	0.115517	0.271653
Zm00001eb024120	3.225	2.655	2.735	7.225	5.355	3.165	4.015	2.01	4.41	5.505	6.425	5.485	1.1637	0.00785726	0.0207026	1.01217	0.0606643	0.241351	0.210665	0.678005	0.930853	0.455343	0.239261	0.596417	1.6765	0.00742322	0.0671411	0.314713	0.649828	1	-0.392255	0.502892	0.721287	0.26281	0.550564	0.736606	0.793286	0.364536	0.603396
Zm00001eb024180	7.84	15.71	12.475	10.495	27.865	22.31	14.365	41.315	17.165	13.095	55	46.69	0.420777	0.252635	0.375163	0.826771	0.000873989	0.00863819	0.838651	0.00182946	0.0190914	-0.133542	1	1	0.412766	0.114378	0.446352	1.44364	5.55231e-08	4.08324e-06	0.319314	0.270669	0.485133	0.980977	2.98413e-06	2.34743e-05	1.06542	0.00277785	0.0141432
Zm00001eb024220	10.01	25.19	28.07	21.935	22.475	20.025	0.001	0.001	0.001	0.001	0.001	0.001	1.13179	0.00010438	0.000448727	-0.16453	0.79487	0.994595	-0.487227	0.309578	0.643057	0	1	1	0	1	1	0	1	1	-14.4209	1.72497e-24	1.06316e-22	-14.456	8.63482e-29	5.61368e-27	-14.2895	1.20553e-17	6.78412e-16
Zm00001eb024230	70.885	198.945	209.25	210.805	174.825	178.425	231.615	241.085	227.925	231.83	178.9	166.625	1.57236	1.84117e-14	3.746e-13	-0.186458	0.651551	0.925552	-0.22991	0.89757	1	0.00133858	0.515463	0.856277	-0.430389	0.0553219	0.283469	-0.451954	0.0244713	0.195064	0.137158	0.256115	0.468016	0.0332419	0.621588	0.793615	-0.0987129	0.323142	0.55723
Zm00001eb024250	13.925	4.21	6.595	4.77	4.625	5.12	0.001	0.001	0.001	0.001	0.001	0.001	-1.54562	6.67215e-06	3.66038e-05	0.135633	0.785673	0.990543	-0.365229	0.780268	0.981176	0	1	1	0	1	1	0	1	1	-12.2198	5.98124e-07	6.48529e-06	-12.1752	2.12317e-06	1.72122e-05	-12.3219	2.11036e-06	2.50551e-05
Zm00001eb024260	14.025	4.405	4.915	3.035	4.06	3.315	2.775	3.03	4.28	3.69	5.215	4.36	-2.20823	4.58001e-09	4.34677e-08	-0.117662	1	1	-0.568183	0.609678	0.888812	0.411133	0.407958	0.776614	0.783349	0.283411	0.713998	0.0267173	1	1	0.281924	0.658274	0.840687	0.361188	0.432123	0.629284	0.395319	0.744571	0.911344
Zm00001eb024280	74.625	96.3	92.8	53.395	94.63	69.53	55.645	65.285	95.78	45.315	153.495	129.74	-0.482954	0.013402	0.0327789	-0.0252382	0.788365	0.991715	-0.416489	0.41481	0.74936	-0.296263	0.478492	0.835199	1.23337	1.48751e-07	6.5081e-06	0.437827	0.0387157	0.264846	-0.236716	0.550523	0.759618	0.697822	5.73493e-05	0.000345521	0.899916	0.00531727	0.0242313
Zm00001eb024290	8.84	16.43	13.06	11.405	9.91	4.715	8.5	4.025	10.545	6.195	6.125	6.855	0.367548	0.318608	0.448126	-0.729376	0.0396667	0.178627	-1.46983	0.00208941	0.0210855	-0.456359	0.530924	0.86626	0.605721	0.377882	0.815228	-0.621331	0.189496	0.653565	-0.88049	0.0538643	0.146499	-0.694175	0.114387	0.242471	0.539899	0.564708	0.782274
Zm00001eb024300	2.19	3.625	3.16	8.66	7.5	5.21	0.915	1.305	0.905	3.175	1.51	1.35	1.98344	2.30079e-05	0.000113479	1.04891	0.0168989	0.0948327	0.721359	0.117365	0.374787	1.79491	0.0192956	0.116279	0.210499	1	1	0.57697	1	1	-1.44761	0.00531941	0.0217867	-2.31234	5.85959e-05	0.000351983	-1.94832	0.0077638	0.0328891
Zm00001eb024380	67.73	170.93	141.205	166.045	156.265	166.35	75.005	83.095	54.9	74.64	64.1	49.82	1.29371	3.80801e-10	4.29241e-09	-0.129411	0.858484	1	0.236431	0.109019	0.358867	-0.00703779	0.565182	0.889536	-0.374437	0.164538	0.544978	-0.140081	0.606019	0.992887	-1.15355	2.68936e-06	2.56737e-05	-1.2856	1.15358e-06	9.79835e-06	-1.73942	2.87043e-09	5.64292e-08
Zm00001eb024390	6.53	57.185	31.795	37.925	34.7	35.12	6.06	0.001	0.45	0.001	15.065	0.001	2.53799	6.27844e-20	2.43557e-18	-0.720701	0.0383058	0.174318	0.143493	0.219973	0.537547	-12.5651	0.00121503	0.0132602	13.8789	1.88927e-05	0.000462145	-8.81378	0.504273	0.944807	-15.2109	7.63613e-38	9.77315e-36	-1.20373	0.120826	0.252957	-15.1	1.09395e-27	1.48565e-25
Zm00001eb024480	0.995	0.87	0.805	0.65	0.98	0.42	3.47	3.525	3.94	2.88	3.01	1.285	-0.614257	0.773446	0.865843	0.171766	1	1	-0.938599	1	1	-0.268867	1	1	-0.22786	0.859544	1	-1.61643	0.0444047	0.287401	2.14756	0.0118593	0.0429378	1.61891	0.0532319	0.132622	1.61331	0.489948	0.723118
Zm00001eb024720	0.575	1.615	0.445	1.525	0.59	0.505	0.001	4.86	0.001	0.95	0.85	0.47	1.40718	0.157768	0.257698	-1.45275	0.360478	0.717009	0.182478	1	1	9.89178	0.125206	0.408265	-2.51542	0.00261332	0.0293096	8.87652	0.504601	0.944807	-0.68281	0.781897	0.924003	0.526748	1	1	-0.103623	1	1
Zm00001eb024740	29.93	7.27	5.205	7.08	6.805	3.05	6.605	5.985	8.02	4.32	6.515	5.48	-2.07977	6.81334e-13	1.14071e-11	-0.0953602	1	1	-0.771089	0.308222	0.641566	-0.612527	0.350777	0.723573	0.122414	1	1	-0.549426	0.251129	0.741114	-0.712718	0.182216	0.367247	-0.06283	1	1	0.845367	0.288361	0.515464
Zm00001eb024820	0.905	1.53	1.78	5.165	3.975	1.965	1.06	1.55	1.885	3.81	2.575	2.415	2.51278	0.000105986	0.000454661	1.37742	0.0367934	0.1695	0.142652	1	1	1.84573	0.0106883	0.0751246	0.732304	0.454773	0.875314	0.357459	0.821515	1	-0.438977	0.589968	0.789645	-0.626382	0.312609	0.50563	0.297494	1	1
Zm00001eb024850	3.265	24.43	24.22	20.93	19.315	20.15	24.17	20.395	23.345	21.76	22.66	20.035	2.68042	4.02299e-15	8.84855e-14	-0.338932	0.375519	0.731521	-0.265419	0.862045	1	-0.151539	1	1	0.151932	0.654969	0.990947	-0.220591	0.415254	0.893508	0.0561062	0.597556	0.794653	0.230426	0.255686	0.43915	-0.00825733	0.618083	0.823348
Zm00001eb024880	11.295	25.865	10.155	9.12	22.82	11.34	30.33	32.53	9.045	3.425	15.555	9.33	-0.308579	0.330459	0.460932	-0.180702	0.860787	1	0.15923	0.648426	0.911408	-3.14657	2.54894e-17	3.67968e-15	-1.06439	0.0604638	0.300905	0.0447566	1	1	-1.41293	0.00415638	0.0177489	-0.55292	0.254641	0.437833	-0.281472	0.522019	0.746647
Zm00001eb024900	21.255	10.455	6.17	8.275	9.475	4.87	9.345	5.34	7.485	7.365	7.525	8.79	-1.36097	2.30544e-06	1.37544e-05	-0.141995	0.9331	1	-0.341349	0.884293	1	-0.343509	0.679432	0.950094	0.494852	0.357202	0.795909	0.231861	0.647813	1	-0.168074	0.92188	1	-0.332434	0.492676	0.68575	0.851941	0.175553	0.367681
Zm00001eb024920	4.505	13.96	16.735	21.855	17.625	18.22	17.285	17.535	19.03	21.07	16.565	17.875	2.27836	3.4208e-10	3.88437e-09	0.336324	0.174539	0.483309	0.122654	0.33299	0.670364	0.28567	0.137023	0.43085	-0.0820992	0.762196	1	-0.0903323	0.833596	1	-0.0527731	0.921107	1	-0.0894851	0.948197	1	-0.0275797	0.628661	0.830704
Zm00001eb024930	8.005	7.81	3.98	3.94	6.82	1.83	6.895	6.05	9.475	4.695	7.665	8.035	-1.02271	0.0214274	0.04887	-0.195551	0.840436	1	-1.12092	0.210583	0.525971	-0.554425	0.448079	0.811805	0.341351	0.521711	0.913396	-0.237828	0.665565	1	0.25293	0.588401	0.788495	0.168514	0.693252	0.84597	2.13445	0.00917567	0.0378253
Zm00001eb024960	13.105	35.77	28.38	41.68	54.97	50.775	49.58	96.095	57.32	53.165	80.215	60.035	1.66924	4.4901e-12	6.6576e-11	0.619894	0.00298762	0.0240944	0.839244	0.000142437	0.0023645	0.100719	0.345559	0.717775	-0.260589	0.212509	0.625369	0.0667652	0.778283	1	0.351122	0.0704859	0.18051	0.545228	0.00284129	0.0111068	0.241685	0.779774	0.934199
Zm00001eb024970	53.915	8.82	9.03	7.555	7.705	9.975	0.125	0.001	0.001	0.27	0.225	0.001	-2.83518	2.32747e-27	1.82469e-25	-0.194984	0.839411	1	0.143591	0.404933	0.739501	1.11103	1	1	7.81378	1	1	0	1	1	-4.8064	2.11706e-08	2.91603e-07	-5.0978	7.61248e-10	1.02928e-08	-13.2841	7.50366e-11	1.85798e-09
Zm00001eb024990	23.65	89.53	112.155	56.5	47.02	78.56	80.04	99.58	77.845	73.45	65.34	48.165	1.25641	2.40846e-08	2.05491e-07	-0.929097	0.0011246	0.0106911	-0.513627	0.328783	0.666635	-0.123959	0.972448	1	-0.60789	0.0146667	0.111404	-0.692619	0.00324211	0.0441246	0.378512	0.0332654	0.100205	0.474692	0.0101138	0.0332308	-0.70581	0.0100476	0.0408003
Zm00001eb025010	5.945	12.035	14.095	6.79	12.535	7.61	23.685	24.82	23.72	16.1	21.32	20.535	0.191735	0.763515	0.857617	0.0587259	0.781049	0.988525	-0.889215	0.0765422	0.285193	-0.556913	0.185792	0.519677	-0.219296	0.374163	0.812236	-0.208019	0.518752	0.950624	1.24558	0.000775775	0.00417278	0.766245	0.0123481	0.0394824	1.43212	0.00165302	0.00911919
Zm00001eb025020	16.885	22.945	24.905	33.995	37.955	39.695	24.615	17.68	26.565	39.48	22.39	42.82	1.00958	4.21433e-05	0.000196882	0.72611	0.00266971	0.0219431	0.672522	0.00118898	0.0135912	0.681584	0.00134435	0.0143403	0.340736	0.29	0.718228	0.688758	0.00528172	0.0639672	0.215799	0.199901	0.391604	-0.761435	0.00199727	0.00821133	0.109327	0.87371	0.98678
Zm00001eb025050	0.185	0.001	0.001	0.001	0.001	0.001	4.73	2.53	3.87	2.465	3.425	5.655	-7.53138	1	1	0	1	1	0	1	1	-0.940253	0.21715	0.566871	0.436967	0.585236	0.95546	0.547193	0.362933	0.851981	11.2674	0.00032772	0.00194804	11.7419	7.92488e-05	0.000462055	12.4653	3.09e-06	3.54983e-05
Zm00001eb025070	41.03	12.695	15.08	14.07	15.475	14.83	2.26	2.25	1.695	1.955	2.385	2.33	-1.54406	3.60394e-10	4.07642e-09	0.285679	0.240222	0.582429	-0.0241178	0.721123	0.954837	-0.209154	1	1	0.0840643	1	1	0.459045	0.812689	1	-2.84738	6.69366e-09	9.88673e-08	-2.69788	1.67692e-10	2.44375e-09	-2.67012	4.85882e-07	6.50237e-06
Zm00001eb025100	2.165	6.99	3.115	1.32	3.75	1.595	9.155	6.56	6.215	5.465	3.435	3.505	-0.713829	0.336135	0.467379	-0.898402	0.112793	0.367073	-0.965676	0.481096	0.804281	-0.744338	0.18761	0.522594	-0.933386	0.0777283	0.350325	-0.82634	0.122124	0.526701	2.04968	0.00193489	0.00918806	-0.12658	1	1	1.13586	0.221345	0.432804
Zm00001eb025120	3.18	19.95	4.715	21.775	11.395	8.795	0.001	0.001	0.001	0.001	0.48	0.001	2.77557	2.56228e-06	1.5189e-05	-0.807988	0.456337	0.804169	0.899426	0.219402	0.536907	0	1	1	8.90689	0.500038	0.902459	0	1	1	-14.4104	2.64696e-12	5.95488e-11	-4.56922	0.00186108	0.0077094	-13.1025	1.02113e-06	1.2943e-05
Zm00001eb025150	2.275	8.48	3.715	8.65	7.625	3.21	7.54	7.05	5.645	6.825	7.845	5.47	1.92683	2.71059e-05	0.000131731	-0.153327	0.920184	1	-0.210789	1	1	-0.143735	1	1	0.15415	0.802847	1	-0.0454327	1	1	-0.341871	0.55758	0.765367	0.0410361	0.917155	0.993609	0.768968	0.386363	0.625523
Zm00001eb025170	28.63	28.57	20.56	32.89	23.9	19.6	17.185	15.98	24.305	26.415	33.685	33.45	0.200121	0.501854	0.634729	-0.25749	0.558523	0.871797	-0.0689866	0.777396	0.979672	0.620208	0.00892017	0.0654037	1.07584	0.000123332	0.00235394	0.460753	0.0719335	0.388303	-0.316292	0.428805	0.653455	0.495096	0.0131779	0.041663	0.771153	0.0647442	0.178086
Zm00001eb025210	75.065	40.33	33.345	34.645	36.125	32.46	16.18	12.54	13.485	12.485	14.54	14.9	-1.11549	1.24177e-07	9.41934e-07	-0.158856	0.788421	0.991715	-0.0388074	0.570361	0.863674	-0.374016	0.519787	0.858656	0.21349	0.612408	0.968943	0.143957	0.684476	1	-1.47245	6.19815e-07	6.68526e-06	-1.31297	2.57583e-07	2.45005e-06	-1.12335	3.71173e-05	0.000338121
Zm00001eb025230	10.225	8.705	7.83	6.445	9.055	6.47	0.465	0.405	0.405	0.985	1.165	1.495	-0.665849	0.0485548	0.0976503	0.0568703	0.773322	0.987597	-0.275247	0.899363	1	1.08289	0.453772	0.815124	1.52434	0.453248	0.875314	1.88415	0.309274	0.80029	-2.70998	3.55082e-05	0.000269985	-2.95838	1.55269e-07	1.53804e-06	-2.11362	0.000977934	0.00586937
Zm00001eb025310	70.025	33.475	33.83	29.115	26.075	27.44	30.37	26.735	28.37	21.545	25.92	25.405	-1.26611	6.5237e-10	7.07928e-09	-0.360417	0.289437	0.642152	-0.302023	0.712597	0.94901	-0.495294	0.176513	0.504532	-0.044664	0.827598	1	-0.159254	0.556593	0.969829	-0.43441	0.175544	0.356986	-0.00860153	0.844484	0.949325	-0.111168	0.389438	0.628437
Zm00001eb025360	4.87	5.43	4.72	4.705	5.245	2.31	0.001	0.001	0.001	0.001	0.001	0.001	-0.049727	0.90617	0.965744	-0.0500094	1	1	-1.03089	0.185569	0.489466	0	1	1	0	1	1	0	1	1	-12.2	1.20445e-06	1.22906e-05	-12.3567	6.97055e-08	7.262e-07	-11.1737	0.00300254	0.0150653
Zm00001eb025370	1.045	3.945	2.38	2.475	3.63	2.205	0.001	0.001	0.001	0.001	0.001	0.001	1.24393	0.103812	0.184317	-0.120056	1	1	-0.110183	1	1	0	1	1	0	1	1	0	1	1	-11.2732	0.000828358	0.0044167	-11.8258	8.63368e-06	6.21404e-05	-11.1066	0.00645236	0.0282482
Zm00001eb025400	12.295	14.195	15.1	14.65	17.44	14.045	7.105	10.65	8.51	6.44	6.59	6.425	0.252829	0.489352	0.622931	0.297017	0.266176	0.614379	-0.104492	0.877544	1	-0.141774	1	1	-0.692503	0.0943386	0.396761	-0.405463	0.395358	0.875343	-1.18577	0.00226186	0.0105332	-1.40405	2.33928e-05	0.000153312	-1.12829	0.00377374	0.0181415
Zm00001eb025450	7.405	5.52	7.455	6.275	5.13	5.63	0.001	0.001	0.305	0.245	0.35	0.71	-0.238884	0.499587	0.632631	-0.105709	1	1	-0.405073	0.694674	0.938974	7.93664	1	1	8.45121	1	1	1.21901	0.628389	0.999434	-4.67876	7.27917e-07	7.74505e-06	-3.87353	2.79423e-05	0.000180432	-2.98724	0.000192451	0.00143896
Zm00001eb025460	87.625	50.825	93.855	162.095	103.645	45.86	79.23	34.725	43.86	82.745	37.845	55.955	0.887425	0.00152994	0.00494401	1.02804	5.14243e-06	9.85613e-05	-1.0332	0.012573	0.0822878	0.0626253	0.454588	0.815124	0.124128	0.69665	1	0.351361	0.285722	0.779375	-0.970096	0.000745194	0.00403343	-1.45348	1.44147e-10	2.11793e-09	0.287031	0.742201	0.909614
Zm00001eb025490	0.001	0.4	0.001	1.485	4.4	3.27	1.77	1.565	1.335	1.405	1.05	4.125	10.5362	0.0122755	0.0304073	3.45943	0.00367272	0.0284698	11.6751	0.00012848	0.0021646	-0.333179	1	1	-0.575773	0.753999	1	1.62755	0.0619064	0.356336	-0.0798928	1	1	-2.06711	0.0216871	0.0634574	0.335103	0.888677	0.994735
Zm00001eb025550	31.02	20.26	23.535	38.045	45.9	78.33	13.615	12.47	12.25	14.065	17.565	19.805	0.294508	0.487471	0.62116	1.17986	2.21401e-06	4.60436e-05	1.73476	4.0238e-11	4.75467e-09	0.0469126	0.631296	0.924779	0.494242	0.173594	0.562009	0.693083	0.030491	0.226233	-1.4356	5.36235e-07	5.87298e-06	-1.38579	7.2878e-09	8.67187e-08	-1.9837	7.12513e-13	2.32993e-11
Zm00001eb025640	43.205	87.085	94.505	90.085	107.11	117.28	50.7	53.975	44.965	46.985	55.53	56.37	1.06009	8.3003e-07	5.37978e-06	0.298597	0.0941256	0.325988	0.311494	0.0551138	0.232418	-0.109785	0.928692	1	0.0409761	0.977574	1	0.326125	0.14833	0.578909	-0.939087	0.00016158	0.00104778	-0.947754	7.09392e-06	5.21721e-05	-1.05696	1.06969e-05	0.000110617
Zm00001eb025650	11.125	8.01	7.16	13.03	10.38	8.885	11.5	7.515	9.565	19.515	14.445	21.725	0.228032	0.577076	0.702107	0.373932	0.250831	0.59589	0.311412	0.250026	0.576127	0.76295	0.0230033	0.132097	0.942725	0.0139111	0.107004	1.18352	0.00445407	0.0561989	0.582746	0.0567409	0.152386	0.476764	0.0753046	0.174686	1.28991	0.0125075	0.0485951
Zm00001eb025670	40.01	34.15	26.73	43.305	29.63	22.645	25.885	30.62	29.75	52.485	43.79	42.775	0.114173	0.743451	0.842192	-0.204827	0.684729	0.944177	-0.239267	0.869021	1	1.01979	1.52437e-06	3.87202e-05	0.516127	0.0408166	0.230925	0.523878	0.0318353	0.232553	0.277372	0.106327	0.246844	0.563543	0.00491487	0.0178685	0.917575	0.00946923	0.0388429
Zm00001eb025690	223.24	200.565	47.13	68.08	70.85	0.74	233.575	51.18	121.6	249.915	178.705	48.91	-1.71329	5.42795e-05	0.000247744	-1.50123	0.00114482	0.0108368	-5.99298	7.90428e-23	1.46771e-19	0.0975516	0.647725	0.932535	1.80393	1.04343e-12	1.26551e-10	-1.31394	0.178527	0.637616	1.87613	0.00150172	0.00734362	1.33474	5.36438e-10	7.34585e-09	6.04646	3.25487e-05	0.000301494
Zm00001eb025720	4.675	5.3	4.885	4.495	4.215	4.76	17.165	15.445	14.92	19.86	15.2	21.44	-0.0566452	0.903367	0.963412	-0.33046	0.779261	0.98784	-0.037397	0.874671	1	0.210396	0.239418	0.596536	-0.0230685	0.936216	1	0.523057	0.0788974	0.411605	2.14347	4.27896e-10	7.42269e-09	1.85047	1.48017e-07	1.47111e-06	2.17127	1.70974e-06	2.07334e-05
Zm00001eb025730	7.71	5.14	3.53	2.625	2.86	5.225	8.52	8.81	8.54	6.105	6.37	11.195	-1.55441	0.000437008	0.00161465	-0.845753	0.158018	0.454329	0.565763	0.213694	0.530784	-0.480862	0.457547	0.816711	-0.467849	0.281668	0.71198	0.390547	0.296466	0.789581	1.21767	0.0158941	0.054908	1.15528	0.0130737	0.0413778	1.09935	0.067011	0.18285
Zm00001eb025780	29.31	41.29	41.855	56.05	55.815	55.94	28.83	35.145	30.585	54.48	30.35	22.33	0.935321	1.5126e-05	7.73733e-05	0.43486	0.0370353	0.170344	0.41848	0.0281878	0.147975	0.918156	1.29894e-05	0.000262057	-0.211623	0.377031	0.814537	-0.453841	0.103876	0.480483	-0.0409877	0.821146	0.945776	-0.878956	0.000399374	0.0019664	-1.3249	4.91171e-06	5.41366e-05
Zm00001eb025790	23	50.135	46.55	16.46	35.38	33.875	54.365	56.53	51.02	8.27	18.695	19.435	-0.48267	0.165439	0.267789	-0.502884	0.158046	0.454329	-0.45856	0.340522	0.679698	-2.71672	9.06472e-19	1.53952e-16	-1.59636	3.88964e-11	3.42656e-09	-1.39241	8.93881e-08	6.18661e-06	-0.993005	0.00905928	0.0344361	-0.920282	0.000220162	0.00116015	-0.801564	0.00572598	0.0256863
Zm00001eb025840	21.345	10.065	4.52	6.79	6.055	1.255	5.94	3.795	5.32	1.115	2.69	2.545	-1.65241	3.11147e-08	2.60216e-07	-0.733148	0.0967132	0.332049	-1.84864	0.017022	0.102242	-2.41342	0.000395286	0.00513062	-0.496494	0.459369	0.878745	-1.06376	0.104881	0.483151	-2.60637	5.15707e-05	0.000377315	-1.17052	0.031479	0.0864785	1.01998	0.400075	0.638393
Zm00001eb025850	3.645	3.15	2.945	0.57	0.255	0.49	0.001	0.001	0.001	0.001	0.001	0.001	-2.67688	0.00121243	0.00402122	-3.62678	0.00127407	0.0118199	-2.58741	0.0225476	0.125325	0	1	1	0	1	1	0	1	1	-9.15482	0.256899	0.468478	-7.99435	1	1	-8.93664	0.516185	0.742646
Zm00001eb025870	1.695	0.44	1.635	0.001	0.001	0.001	0.915	1.06	1.585	0.001	0.22	0.325	-10.7271	0.00126035	0.00416116	-8.78136	0.503577	0.834965	-10.6751	0.0312984	0.158634	-9.83763	0.136712	0.430444	-2.26849	0.387933	0.820085	-2.28597	0.138573	0.560555	0	1	1	7.78136	1	1	8.3443	1	1
Zm00001eb025880	11.945	20.325	15.53	6.775	8.96	6.48	10.01	5.75	8.805	5.655	3.575	6.62	-0.818114	0.0117983	0.0293974	-1.18168	0.000651484	0.00673149	-1.26099	0.0069996	0.0532675	-0.823843	0.0968171	0.34927	-0.685619	0.185142	0.580504	-0.411492	0.406364	0.884278	-0.260694	0.737015	0.895086	-1.32556	0.00346053	0.0132169	0.0308374	0.9098	1
Zm00001eb025920	2.34	5.095	6.515	8.39	3.925	6.14	1.4	1.855	1.56	1.35	1.56	1.485	1.84216	6.47808e-05	0.000290709	-0.376389	0.775708	0.98784	-0.0855265	0.894713	1	-0.0524674	1	1	-0.249873	1	1	-0.0710831	1	1	-2.63571	4.77523e-06	4.3774e-05	-1.33115	0.0446357	0.115025	-2.04778	0.0022983	0.0120378
Zm00001eb025950	6.775	9.36	9.83	5.82	6.06	3.22	7.825	4.81	11.615	6.56	3.805	6.665	-0.219202	0.536945	0.665433	-0.627191	0.212766	0.54301	-1.61013	0.00457245	0.0383066	-0.254395	0.923024	1	-0.33814	0.620644	0.974348	-0.801312	0.0428017	0.280493	0.172677	0.603283	0.799585	-0.671421	0.307784	0.50012	1.04954	0.136812	0.308641
Zm00001eb026010	8.115	11.7	6.155	11.435	9.05	0.235	10.325	8.515	11.89	6.235	5.165	6.81	0.494793	0.16736	0.270304	-0.370519	0.493833	0.830113	-4.71103	3.05229e-06	9.26955e-05	-0.72768	0.221876	0.573469	-0.721238	0.172535	0.560136	-0.804022	0.13779	0.558421	-0.874995	0.102382	0.239599	-0.809149	0.064767	0.154809	4.85692	0.00035848	0.00245865
Zm00001eb026050	0.185	0.235	0.001	0.001	0.735	0.001	3.015	4.56	0.001	1.03	0.575	0.001	-7.53138	1	1	1.64508	0.628071	0.91424	0	1	1	-1.54951	0.0964796	0.348585	-2.9874	0.00251913	0.0285108	0	1	1	10.0084	0.0686252	0.176928	-0.354182	1	1	0	1	1
Zm00001eb026100	3.13	1.98	2.69	7.345	8.025	15.43	13.55	8.225	11.47	15.85	10.53	19.85	1.2306	0.017874	0.0418744	2.019	0.000101806	0.00138649	2.52006	1.49229e-06	5.00561e-05	0.22619	0.385004	0.756812	0.356418	0.531367	0.920038	0.791274	0.00970185	0.101288	1.10965	0.00529504	0.0217101	0.391932	0.269694	0.456391	0.363401	0.64774	0.844098
Zm00001eb026130	5.175	11.77	14.305	13.95	12.63	16.605	13.26	19.265	2.43	25.74	8.22	3.685	1.43063	0.000140589	0.000587591	0.10174	0.693879	0.947961	0.215098	0.410522	0.745091	0.956931	0.0111882	0.0778589	-1.22877	0.0850823	0.371129	0.600708	0.432521	0.90789	0.883747	0.00293999	0.013154	-0.619644	0.209701	0.382657	-2.17188	4.94418e-05	0.000435343
Zm00001eb026140	28.255	62.525	81.855	75.595	70.785	74.425	1.225	1.6	0.001	1.73	0.9	0.805	1.41978	3.36712e-08	2.79514e-07	0.179011	0.340489	0.698544	-0.137283	0.869295	1	0.49799	0.581247	0.899029	-0.830075	0.50796	0.902459	9.65284	0.252576	0.741114	-5.44945	2.25714e-38	3.0038e-36	-6.29737	6.31599e-42	8.5875e-40	-6.53065	2.2794e-22	1.97632e-20
Zm00001eb026150	0.39	3.92	8.575	4.51	1.35	2.215	40.975	69.15	15.305	47.63	26.835	11.98	3.53158	0.000485087	0.00176958	-1.53789	0.0703654	0.267107	-1.95283	0.0314064	0.159022	0.217127	0.210587	0.557353	-1.36561	0.00011244	0.00218605	-0.353375	0.30657	0.798013	3.40067	2.73951e-19	1.154e-17	4.31308	1.58973e-19	5.53717e-18	2.43525	4.17479e-05	0.000375548
Zm00001eb026160	0.475	3.775	8.36	4.925	1.105	1.47	35.525	62.665	14.7	53.315	27.9	16.44	3.37412	3.95251e-06	2.25827e-05	-1.77243	0.0297436	0.144503	-2.50769	0.0366556	0.175909	0.585707	0.00495907	0.0417027	-1.16739	0.000440064	0.00690855	0.161394	0.646933	1	3.43635	4.02324e-24	2.39683e-22	4.65815	4.13599e-26	2.31821e-24	3.48332	4.47647e-09	8.52323e-08
Zm00001eb026170	9.475	6.39	5.5	6.13	4.3	4.3	5.055	4.18	2.595	1.985	2.975	3.425	-0.628239	0.0780533	0.145096	-0.571479	0.38627	0.741147	-0.355095	0.881201	1	-1.34857	0.064675	0.270364	-0.490613	0.46511	0.883143	0.400369	0.579421	0.982252	-1.62675	0.00468137	0.0196088	-0.531447	0.491953	0.685016	-0.328233	0.572333	0.788463
Zm00001eb026190	1.245	15.745	10.62	8.64	9.425	7.89	10.015	13.895	10.285	7.94	12.52	10.49	2.79489	5.22112e-08	4.21829e-07	-0.740329	0.074737	0.277895	-0.428687	0.62899	0.898995	-0.334952	0.6864	0.95447	-0.150331	0.618101	0.97217	0.0284729	1	1	-0.121892	1	1	0.40967	0.196893	0.365194	0.410917	0.656745	0.849304
Zm00001eb026220	5.72	23.945	12.08	11.815	16.475	6.69	13.36	33.57	9.305	18.935	13.08	3.51	1.04653	0.00800239	0.0210257	-0.539446	0.151583	0.442874	-0.852542	0.0938691	0.32467	0.503135	0.236357	0.593346	-1.35981	2.20123e-07	9.111e-06	-1.40654	0.00361232	0.047956	0.680436	0.129553	0.286046	-0.332916	0.343677	0.539114	-0.930535	0.0451883	0.134319
Zm00001eb026250	7.76	10.13	14.715	9.28	7.415	11.27	2.83	4.36	4.745	2.525	2.755	3.92	0.258068	0.554331	0.681399	-0.450116	0.389132	0.744349	-0.3848	0.673435	0.928635	-0.164519	1	1	-0.662276	0.255829	0.678223	-0.275554	0.759243	1	-1.87784	0.00020621	0.00129695	-1.42839	0.00443386	0.0163445	-1.52356	0.00102997	0.00612645
Zm00001eb026260	12.185	30.975	48.97	26.56	26.92	37.105	7.32	13.05	14.975	5.88	8.185	13.495	1.12415	4.2742e-05	0.000199181	-0.202426	0.686335	0.944948	-0.400285	0.48102	0.804281	-0.316027	0.841816	1	-0.672995	0.0761001	0.345364	-0.150131	0.693718	1	-2.17537	9.05553e-11	1.72526e-09	-1.71762	1.31544e-09	1.73395e-08	-1.45919	5.22686e-06	5.71605e-05
Zm00001eb026330	18.115	30.565	31.13	49.185	68.19	28.795	33.04	50.05	35.945	59.585	54.795	50.58	1.44103	5.84385e-09	5.46114e-08	1.15768	6.87578e-07	1.59189e-05	-0.112487	0.8203	0.999341	0.850736	0.000367033	0.0048266	0.130674	0.671871	1	0.492776	0.0413604	0.274755	0.276731	0.177791	0.360426	-0.315516	0.21776	0.392987	0.812749	0.0235199	0.0805732
Zm00001eb026440	5.62	6.635	7.695	12.95	11.89	29.67	8.815	3.87	7.235	23.89	5.02	25.81	1.20431	0.000909975	0.0031184	0.84158	0.0176052	0.0978099	1.94701	1.40868e-09	1.17749e-07	1.43837	8.95057e-07	2.40518e-05	0.375354	0.633832	0.979249	1.83487	4.0453e-06	0.000176161	0.883455	0.000604925	0.00336476	-1.24399	0.00180124	0.00749283	-0.201075	0.312084	0.544296
Zm00001eb026450	2.145	1.765	5.185	15.65	6.92	9.365	4.51	1.665	2.905	8.81	3.415	12.645	2.86711	3.51538e-12	5.32389e-11	1.9711	0.000853825	0.00847091	0.852935	0.0530325	0.225894	0.966015	0.00797988	0.0598433	1.03636	0.189596	0.586328	2.12196	1.05335e-05	0.000398524	-0.828949	0.0256914	0.0810878	-1.01889	0.0659645	0.156984	0.433216	0.540948	0.762858
Zm00001eb026490	18.24	30.605	20.61	29.21	18.975	6.3	20.43	12.855	16.775	5.28	13.025	10.21	0.679357	0.00836938	0.0218715	-0.689667	0.0276339	0.136865	-1.70992	7.83295e-05	0.00144826	-1.95208	4.89303e-06	0.000109419	0.0189538	1	1	-0.71633	0.177829	0.636602	-2.46785	3.65548e-13	9.00373e-12	-0.542817	0.0960346	0.211641	0.696559	0.445358	0.682472
Zm00001eb026560	0.18	0.001	1.125	0.305	0.215	0.285	4.285	3.535	5.47	3.07	4.795	6.87	0.760812	1	1	7.74819	1	1	-1.98089	0.375129	0.710367	-0.481057	0.601716	0.911697	0.439821	0.504569	0.902459	0.328769	0.636907	1	3.33136	0.000477592	0.00271926	4.47912	1.28865e-06	1.08202e-05	4.59128	2.15311e-05	0.000208254
Zm00001eb026640	32.285	12.365	21.48	33.595	23.33	8.02	7.57	4.295	14.65	6.045	7.635	5.645	0.0573825	0.949927	1	0.915924	0.000559955	0.00595408	-1.42132	0.0201956	0.116487	-0.324551	0.725928	0.971522	0.82997	0.135092	0.488307	-1.37586	0.000680142	0.0129893	-2.47443	5.10289e-13	1.2388e-11	-1.61149	9.71664e-08	9.88831e-07	-0.506629	0.365424	0.604255
Zm00001eb026650	62.085	112.835	153.46	72.01	78.91	89.995	48.805	35.93	60.57	25.29	33.4	58.565	0.213953	0.414651	0.549948	-0.515935	0.0638062	0.250195	-0.769946	0.0231049	0.127659	-0.948462	0.000687176	0.0082073	-0.105341	0.613338	0.969353	-0.0485647	0.847447	1	-1.50963	5.26348e-09	7.87873e-08	-1.24036	1.22187e-08	1.4119e-07	-0.619806	0.00381942	0.0183214
Zm00001eb026660	43.43	38.805	38.69	18.87	24.605	23.085	15.78	12.02	18.98	7.05	12.02	16.155	-1.2026	2.19327e-07	1.58912e-06	-0.657291	0.0326514	0.155232	-0.745005	0.0539173	0.228726	-1.1624	0.00389077	0.0343066	0	1	1	-0.232499	0.500375	0.944807	-1.4204	0.000107977	0.00073269	-1.03351	0.000310863	0.00157311	-0.514975	0.0563709	0.159778
Zm00001eb026670	2.045	6.83	3.98	11.955	24.85	13.665	6.34	19.315	10.915	16.14	33.9	31.88	2.54744	9.20709e-10	9.72912e-09	1.86329	5.13701e-09	1.86142e-07	1.77965	3.79123e-06	0.000111238	1.34809	5.82515e-05	0.00100176	0.811564	0.0029585	0.032387	1.54634	5.41302e-08	4.01399e-06	0.433026	0.0763957	0.191924	0.448039	0.0233797	0.0674594	1.22217	0.000867369	0.00529048
Zm00001eb026690	30.225	22.31	17.61	26.03	33.49	6.45	27.355	15.145	30.29	26.12	25.29	21.485	-0.215567	0.431271	0.566995	0.58604	0.00789227	0.0520095	-1.44902	0.000569071	0.0074715	-0.0666497	0.928893	1	0.739725	0.0363959	0.213464	-0.495512	0.39669	0.876728	0.00497959	0.881755	0.979122	-0.405163	0.165681	0.321346	1.73596	0.0084727	0.0353705
Zm00001eb026700	6.36	3.06	2.4	1.96	2.585	2.935	0.001	0.001	0.001	0.001	0.001	0.001	-1.69817	0.000777305	0.00270589	-0.243367	0.850969	1	0.290326	0.663971	0.921105	0	1	1	0	1	1	0	1	1	-10.9366	0.00249217	0.0114071	-11.3359	0.000295585	0.00150204	-11.5191	0.001274	0.007364
Zm00001eb026710	22.315	50.695	17.36	6.92	20.995	11.74	8.92	28.15	14.765	6.455	21.235	25.11	-1.68917	7.89991e-09	7.27609e-08	-1.2718	6.23178e-05	0.000904247	-0.564335	0.437843	0.769148	-0.466627	0.436904	0.802669	-0.406691	0.117098	0.453101	0.766081	0.0124517	0.121235	-0.100355	1	1	0.0163983	0.850555	0.952709	1.09683	0.0470387	0.138398
Zm00001eb026720	10.53	20.275	11.16	2.975	6.62	2.99	3.485	14.5	13.625	3.645	8.49	12.055	-1.82354	4.21385e-06	2.3966e-05	-1.6148	2.02965e-05	0.000335437	-1.90012	0.00333338	0.0302353	0.0647602	0.889724	1	-0.772216	0.0236244	0.157318	-0.176625	0.607962	0.993955	0.293029	0.510066	0.726195	0.358933	0.314618	0.507929	2.01141	0.000599846	0.00384277
Zm00001eb026780	0.001	0.001	0.001	0.001	0.001	0.001	18.97	34.68	13.63	24.535	22.535	11.405	0	1	1	0	1	1	0	1	1	0.371122	0.085104	0.32218	-0.621936	0.0228578	0.153342	-0.257119	0.472279	0.932477	14.5826	1.49409e-25	9.99134e-24	14.4599	6.7706e-28	4.15942e-26	13.4774	3.27256e-11	8.51506e-10
Zm00001eb026800	6.585	28.72	9.71	25.525	11.495	12.685	32.385	52.25	7.085	31.76	27.155	6.19	1.95466	1.48594e-10	1.77425e-09	-1.32105	0.000168356	0.00212266	0.38558	0.131224	0.39754	-0.0281148	0.71356	0.965981	-0.944213	0.000778563	0.0109503	-0.194828	0.703448	1	0.3153	0.121642	0.273154	1.24021	1.35533e-05	9.32265e-05	-1.03511	0.00833642	0.0349117
Zm00001eb026840	3.37	14.035	1.97	1.18	1.785	0.001	1.265	0.95	0.99	0.19	0.495	0.001	-1.51396	0.0432575	0.0886791	-2.97503	6.56998e-06	0.00012199	-10.944	0.0156589	0.096107	-2.73507	0.261897	0.624004	-0.940499	0.694722	1	-9.95128	0.128901	0.540151	-2.63472	0.134214	0.293046	-1.85042	0.153035	0.302355	0	1	1
Zm00001eb026850	0.36	4.045	3.655	8.26	4.305	4.39	6.53	6.655	1.48	8.525	5.645	2.255	4.52007	1.269e-10	1.52916e-09	0.0898735	0.882257	1	0.26435	0.478122	0.802567	0.384617	0.253152	0.612355	-0.237465	0.697332	1	0.60753	0.673122	1	0.0455581	0.799737	0.934318	0.39096	0.368557	0.565265	-0.961094	0.12845	0.294494
Zm00001eb026860	33.8	60.42	22.75	26.715	41.98	19.715	37.03	13.15	18.85	45.34	33.15	24.39	-0.339373	0.156341	0.255894	-0.525324	0.174078	0.482836	-0.206573	1	1	0.29209	0.172885	0.497664	1.33395	1.59527e-05	0.000399599	0.371725	0.31694	0.808358	0.763134	0.00538703	0.0220367	-0.340693	0.241491	0.42216	0.306996	0.703023	0.8829
Zm00001eb026880	36.18	28.725	34.235	17.045	18.585	20.995	35.415	34.95	35.69	23.44	24.785	27.68	-1.08584	3.56322e-06	2.05513e-05	-0.628168	0.0414638	0.184109	-0.705426	0.0684261	0.264743	-0.595388	0.0738403	0.295236	-0.495825	0.0353701	0.209426	-0.366676	0.13892	0.561607	0.459624	0.0405013	0.116554	0.415329	0.0511127	0.128285	0.398798	0.429586	0.667682
Zm00001eb026890	0.001	0.001	0.001	0.001	0.001	0.001	2.655	5.07	2.24	4.355	2.36	0.54	0	1	1	0	1	1	0	1	1	0.713961	0.118077	0.396516	-1.1032	0.143155	0.504924	-2.05247	0.0682995	0.376518	12.0885	9.97968e-07	1.03709e-05	11.2046	0.000516466	0.00247735	9.07682	0.516597	0.742646
Zm00001eb026900	1.205	4.73	3.325	4.725	3.925	2.14	3.335	5.27	1.71	5.34	4.245	2.22	1.97128	0.00124047	0.00410487	-0.269148	0.765363	0.983293	-0.635744	0.663971	0.921105	0.679153	0.120036	0.400144	-0.312038	0.535246	0.923331	0.376563	0.80719	1	0.176525	0.703184	0.871107	0.113072	0.775372	0.906756	0.0529489	1	1
Zm00001eb026930	7.865	13.38	3.555	5.095	5.8	3.565	1.77	3.055	1.41	1.395	1.865	1.38	-0.626365	0.100023	0.17876	-1.20595	0.00398465	0.0304103	0.00405252	0.851081	1	-0.343484	0.791137	1	-0.711997	0.392709	0.82583	-0.0310269	1	1	-1.86882	0.00569486	0.0230701	-1.63688	0.0059016	0.0209342	-1.36923	0.0647346	0.178086
Zm00001eb026940	416.67	225.895	221.58	203.18	199.41	156.825	215.165	187.925	230.26	182.16	192.56	218.47	-1.03615	4.31967e-08	3.53471e-07	-0.179915	0.665165	0.932629	-0.498672	0.231276	0.553164	-0.240237	0.628869	0.924174	0.035151	0.965664	1	-0.0758286	0.708112	1	-0.157552	0.779261	0.922893	-0.0504297	0.973494	1	0.47828	0.220714	0.431888
Zm00001eb026970	9.835	21.655	30.11	23.51	19.995	22.44	1.77	1.395	1.445	1.245	1.11	0.99	1.25728	7.33276e-06	3.9902e-05	-0.115061	0.954856	1	-0.42417	0.447792	0.778962	-0.507604	0.790639	0.999831	-0.329705	1	1	-0.545569	0.753996	1	-4.23906	4.92406e-20	2.16634e-18	-4.17101	5.21828e-19	1.76035e-17	-4.5025	4.7138e-16	2.20126e-14
Zm00001eb026980	24.525	31.02	38.55	26.49	28.425	28.27	12.45	22.615	18.86	13.315	14.865	14.11	0.111195	0.776484	0.868157	-0.126038	0.930884	1	-0.447459	0.35451	0.692594	0.0969067	0.52614	0.862158	-0.605361	0.0289216	0.181725	-0.418612	0.190152	0.654101	-0.992395	0.00107872	0.00557092	-0.935241	0.000297174	0.00150925	-1.00255	0.000583995	0.00375568
Zm00001eb027010	0.505	2.135	2.76	1.055	3.595	5.335	0.27	0.585	0.78	0.001	0.31	0.001	1.06289	0.5209	0.651028	0.751756	0.299503	0.654111	0.95082	0.0924455	0.321996	-8.07682	1	1	-0.916168	1	1	-9.60733	0.252592	0.741114	-10.043	0.0686394	0.176933	-3.53565	0.000664604	0.00309375	-12.3813	2.31498e-06	2.72656e-05
Zm00001eb027020	0.445	2.55	5.1	4.745	10.585	15.775	0.001	0.001	0.001	0.001	0.001	0.001	3.41453	6.015e-05	0.000271906	2.05345	2.7331e-05	0.000437597	1.62907	0.00302183	0.0280155	0	1	1	0	1	1	0	1	1	-12.2122	1.58797e-05	0.00013102	-13.3697	4.71925e-14	1.04295e-12	-13.9454	3.16953e-12	9.46874e-11
Zm00001eb027060	1.005	2.11	2.315	2.68	0.495	2.915	0.001	0.001	0.001	0.4	0.295	0.001	1.41504	0.109739	0.192543	-2.09174	0.0794556	0.290364	0.332484	0.645227	0.910489	8.64386	0.501761	0.84991	8.20457	1	1	0	1	1	-2.74416	0.0120897	0.0436598	-0.746714	1	1	-11.5093	0.00264632	0.0135905
Zm00001eb027200	47.76	28.55	27.35	22.5	26.71	25.69	14.47	20.25	21.55	15.485	18.05	21.99	-1.08588	5.12562e-07	3.46494e-06	-0.0961108	1	1	-0.0903339	0.757894	0.971509	0.0978065	0.434287	0.800749	-0.165923	0.525784	0.915121	0.0291597	0.957025	1	-0.539054	0.102202	0.239261	-0.565381	0.0356001	0.0958243	-0.224359	0.238476	0.456378
Zm00001eb027210	2.44	1.54	0.93	1.365	1.95	1.29	4.96	5.405	6.325	5.335	5.235	5.49	-0.83798	0.339042	0.470148	0.340544	0.808525	0.998386	0.472068	0.732288	0.959455	0.105148	0.676766	0.949273	-0.0461051	1	1	-0.204259	0.796049	1	1.96659	0.00063994	0.00353162	1.42472	0.0102956	0.0337411	2.08944	0.0117911	0.0463051
Zm00001eb027250	0.775	5.08	2.775	4.66	2.34	1.74	5.6	16.08	1.35	3.94	3.205	1.72	2.58806	8.51037e-05	0.000372649	-1.11832	0.0816307	0.295506	-0.6734	0.501255	0.815753	-0.507231	0.478191	0.834861	-2.32687	4.87345e-06	0.000144738	0.349449	0.774738	1	-0.242134	0.88797	0.9821	0.453816	0.623196	0.794986	-0.0166787	1	1
Zm00001eb027280	0.335	0.001	0.48	0.001	0.35	0.001	26.06	15.81	29.905	18.35	23.135	29.585	-8.38802	0.505369	0.636194	8.45121	0.503595	0.834965	-8.90689	0.500739	0.815753	-0.506057	0.17532	0.502429	0.54924	0.0972196	0.402554	-0.0155208	1	1	14.1635	1.92429e-23	1.07459e-21	6.04658	1.13131e-27	6.88683e-26	14.8526	7.44733e-23	6.76563e-21
Zm00001eb027350	6.19	13.39	7.125	7.285	8.79	8.485	2.675	5.145	3.665	2.16	3.24	5.015	0.23499	0.696922	0.803661	-0.607221	0.348798	0.70547	0.252025	0.308876	0.642364	-0.308508	1	1	-0.667177	0.227897	0.649466	0.452437	0.566547	0.973721	-1.7539	0.00188225	0.00895878	-1.43987	0.0471239	0.119982	-0.758665	0.0766092	0.200786
Zm00001eb027360	3.25	9.805	9.545	5.565	8.73	7.23	2.15	3.705	3.17	2.52	3.615	4.47	0.775942	0.261196	0.384042	-0.167536	0.926956	1	-0.40075	0.70792	0.946174	0.229087	0.678743	0.949765	-0.0354779	1	1	0.495792	0.548095	0.966035	-1.14296	0.157886	0.330036	-1.27199	0.00745362	0.0256383	-0.693721	0.137122	0.30918
Zm00001eb027390	16.49	45.82	18.75	34.955	56.465	91.965	16.52	51.815	11.08	26.375	26.765	28.65	1.08391	0.00214583	0.00666057	0.301379	0.281242	0.631958	2.29419	1.13767e-17	6.57219e-15	0.674957	0.0958002	0.34755	-0.953022	6.83434e-05	0.00140325	1.37058	1.78488e-05	0.000617665	-0.406328	0.55786	0.765448	-1.07701	0.000204091	0.00108385	-1.68255	4.2243e-10	9.48882e-09
Zm00001eb027550	1.7	4.005	1.865	6.225	6.77	2.765	5.025	9.34	5.71	9.785	5.295	2.56	1.87254	0.000340763	0.00129505	0.757354	0.113729	0.36888	0.568104	0.35976	0.696426	0.961448	0.0216627	0.126467	-0.818792	0.0640383	0.309062	-1.15735	0.0614916	0.354657	0.652498	0.098964	0.233401	-0.354525	0.522014	0.711169	-0.111136	0.851905	0.975019
Zm00001eb027600	2.875	3.99	6.125	7.05	5.24	4.37	2.775	3.33	2.565	1.96	1.21	0.925	1.29406	0.040804	0.0843626	0.393178	0.445274	0.794088	-0.487077	0.660072	0.920263	-0.501634	0.743526	0.979927	-1.46052	0.112093	0.440598	-1.47143	0.226439	0.707856	-1.84677	0.0595369	0.158494	-2.11456	0.00510075	0.0184595	-2.24011	0.00506783	0.0232538
Zm00001eb027630	1.06	2.085	0.001	4.26	0.001	1.92	4.15	4.35	0.001	3.625	0.001	0.55	2.00679	0.00189207	0.00597419	-11.0258	0.00634983	0.0441116	10.9069	0.0120049	0.0793821	-0.19513	1	1	-12.0868	0.000148079	0.00273509	9.10329	0.505783	0.944807	-0.232872	0.883519	0.979921	0	1	1	-1.8036	0.178061	0.371473
Zm00001eb027670	17.395	43.695	44.22	35.83	31.59	25.785	35.91	33.305	38.485	23.08	27.745	43.955	1.0425	1.49252e-05	7.6391e-05	-0.468	0.122483	0.387987	-0.778167	0.0434956	0.196474	-0.637742	0.0553877	0.244189	-0.263511	0.269246	0.69421	0.191731	0.447299	0.917725	-0.634525	0.0401848	0.11588	-0.18724	0.609991	0.784831	0.769495	0.0542601	0.154851
Zm00001eb027690	7.75	1.855	0.26	2.105	0.905	0.325	1.275	3.63	3.02	1.23	5.99	1.765	-1.88038	6.15653e-05	0.000277516	-1.03543	0.400477	0.754684	0.321928	1	1	-0.0518389	1	1	0.722586	0.240579	0.664478	-0.77488	0.398094	0.877804	-0.775162	0.472343	0.69441	2.72657	4.35156e-05	0.000270182	2.44116	0.0970603	0.239373
Zm00001eb027700	0.225	0.49	0.29	1.165	0.895	1.96	3.46	9.685	3.82	2.21	2.305	3.07	2.37233	0.109603	0.192368	0.869106	0.704319	0.954142	2.75673	0.0503131	0.218253	-0.646726	0.488358	0.841265	-2.07099	0.000401717	0.00641468	-0.315334	0.723494	1	0.923716	0.457886	0.681997	1.36481	0.095416	0.210582	0.647385	0.597541	0.808328
Zm00001eb027740	13.865	14.29	3.745	15.145	12.465	2.35	16.445	4.87	9.52	17.36	17.98	9.145	0.127394	0.872922	0.939979	-0.197123	0.835287	1	-0.672305	0.647218	0.91114	0.0781179	0.509361	0.853039	1.8844	4.55703e-05	0.000996888	-0.0579784	1	1	0.196925	0.356718	0.582531	0.52851	0.1125	0.239531	1.96032	0.00943915	0.0387375
Zm00001eb027760	11.485	31.51	8.99	12.53	12.635	2.64	20.87	15.48	18.39	11.075	16.845	10.64	0.125636	0.811633	0.895149	-1.31838	0.000553199	0.00589283	-1.76778	0.00137003	0.0152533	-0.914124	0.0291589	0.15723	0.121915	0.796474	1	-0.789423	0.202934	0.674731	-0.17808	0.847374	0.959587	0.414895	0.107215	0.230793	2.01089	0.0279593	0.0927493
Zm00001eb027770	1.325	5.795	6.34	12.37	5.255	7.455	5.955	16.9	7.01	10.48	6.045	6.07	3.22278	2.81223e-12	4.33165e-11	-0.141118	1	1	0.233726	0.385027	0.720965	0.815465	0.0195173	0.117262	-1.48321	0.000137209	0.00257031	-0.207718	0.703738	1	-0.239207	0.689839	0.862369	0.202052	0.63183	0.801332	-0.296512	0.381142	0.62039
Zm00001eb027780	8.67	8.1	74.915	15.55	18.79	38.71	4.535	8.345	171.73	5.495	5.84	61.425	0.842811	0.0372512	0.0780651	1.21397	0.000400626	0.0044734	-0.952548	0.00958155	0.0671199	0.277017	0.404676	0.773139	-0.514944	0.327363	0.764269	-1.48324	4.291e-05	0.00131176	-1.50072	0.00228679	0.0106307	-1.68592	1.28066e-06	1.07599e-05	0.66612	0.100945	0.246127
Zm00001eb027790	6.07	8.035	18.595	13.145	10.455	14.235	8.81	10.46	23.86	12.595	13.265	22.195	1.11475	0.00242802	0.00741777	0.379823	0.250363	0.595391	-0.385472	0.559051	0.853934	0.515637	0.0751896	0.29861	0.342742	0.39784	0.830989	-0.104359	0.729071	1	-0.061663	0.940498	1	0.343432	0.22402	0.400452	0.640792	0.158336	0.341235
Zm00001eb027840	11.53	22.68	15.19	8.095	21.965	18.175	8.545	8.505	11.23	2.575	8.44	6.315	-0.51029	0.136711	0.229444	-0.0462141	0.960474	1	0.258833	0.342388	0.681838	-1.73051	0.00182951	0.0184615	-0.0110682	1	1	-0.830503	0.0739648	0.395797	-1.65246	0.00385547	0.0166506	-1.37989	1.33634e-05	9.20148e-05	-1.5251	0.000746096	0.00464107
Zm00001eb027900	11.505	16.28	36.895	123.93	110.85	222.635	27.39	22.67	22.545	74.335	33.695	43.39	3.42919	4.09706e-22	1.95413e-20	2.76744	9.84904e-25	3.03142e-22	2.59318	5.52074e-10	5.01808e-08	1.44039	3.34028e-10	1.77863e-08	0.57175	0.0579242	0.292436	0.944555	0.000462746	0.00945678	-0.737412	0.0256574	0.08099	-1.718	1.80394e-13	3.78673e-12	-2.35925	8.85751e-14	3.22971e-12
Zm00001eb027920	10.125	16.06	21.115	26.085	21.715	32.925	68.27	56.665	60.465	113.415	112.7	125.175	1.3653	3.88082e-06	2.22167e-05	0.43522	0.0713485	0.269587	0.640915	0.00434183	0.0369823	0.732288	0.000136681	0.00208431	0.991958	0.00118397	0.0154568	1.04977	8.06098e-06	0.000318925	2.12032	3.81089e-19	1.59029e-17	2.37572	2.86195e-26	1.62754e-24	1.92669	4.35823e-09	8.30404e-08
Zm00001eb027940	99.97	65.935	35.45	29.31	54.045	76.87	15.985	29.17	34.185	25.1	48.52	72.59	-1.7701	1.43087e-16	3.8038e-15	-0.286883	0.401967	0.756131	1.11664	5.38065e-05	0.00104933	0.650969	0.0199221	0.118979	0.734094	0.00352555	0.0374012	1.08641	9.02564e-07	4.66636e-05	-0.223706	0.686377	0.859819	-0.155582	0.659834	0.822719	-0.0826499	0.481182	0.715747
Zm00001eb027970	35.45	67.245	25.475	66.35	56.21	10.57	19.615	12.165	18.795	37.74	27.845	21.29	0.904311	2.4169e-05	0.00011867	-0.2586	0.598966	0.89718	-1.26911	0.000863174	0.0105695	0.944137	0.00509003	0.0425014	1.19468	0.000445328	0.00696603	0.179827	0.670877	1	-0.814002	0.0267397	0.0837934	-1.01341	1.58732e-05	0.00010791	1.0102	0.0605589	0.168862
Zm00001eb028010	14.48	10.725	9.395	3.675	16.08	7.52	23.075	36.265	30.39	21.815	41.365	29.68	-1.97825	1.13547e-07	8.66828e-07	0.58429	0.0380949	0.173691	-0.32116	0.823827	1	-0.0810102	0.869679	1	0.189833	0.498935	0.902459	-0.0341056	0.928086	1	2.5695	4.22186e-13	1.03227e-11	1.36314	5.47347e-10	7.48759e-09	1.98069	1.12725e-06	1.41935e-05
Zm00001eb028020	39.33	44.28	36.425	11.72	12.03	19.32	36.065	29.51	28.805	7.28	12.155	12.125	-1.74666	6.37769e-11	7.98947e-10	-1.88002	4.88896e-09	1.77576e-07	-0.914834	0.0198882	0.115195	-2.30859	5.82877e-12	4.25451e-10	-1.27965	4.6473e-05	0.00101324	-1.24833	5.25082e-05	0.00154863	-0.686962	0.168097	0.345613	0.0149133	0.941298	1	-0.67211	0.0206931	0.0726469
Zm00001eb028030	136.375	300.365	309.865	376.45	568.965	636.28	177.155	190.935	207.145	263.9	435.92	424.305	1.46488	1.75096e-11	2.39295e-10	0.921623	6.10738e-06	0.000114375	1.03802	4.27884e-06	0.000123045	0.574979	0.0009939	0.0112177	1.19098	8.40597e-08	3.89332e-06	1.03446	2.67523e-07	1.59616e-05	-0.512467	0.0364798	0.107478	-0.384277	0.0873066	0.196365	-0.58456	0.004883	0.0225378
Zm00001eb028110	16.07	4.525	5.535	4.405	4.075	5.23	3.46	3.645	3.995	2.895	2.875	3.615	-1.86716	4.38038e-08	3.58102e-07	-0.151118	1	1	-0.0817724	0.881177	1	-0.257209	0.850714	1	-0.342357	0.690317	1	-0.1442	1	1	-0.605579	0.436218	0.66022	-0.503238	0.513861	0.703921	-0.532815	0.296643	0.526115
Zm00001eb028120	8.64	9.38	10.925	12.545	8.8	10.32	0.001	0.001	0.001	0.001	0.001	0.001	0.538009	0.152514	0.250869	-0.0920844	1	1	-0.0821903	0.772046	0.978364	0	1	1	0	1	1	0	1	1	-13.6148	3.40117e-15	1.02337e-13	-13.1033	2.10619e-12	3.88261e-11	-13.3332	3.4559e-11	8.94837e-10
Zm00001eb028130	4.285	25.545	21.69	19.35	20.38	23.775	0.001	0.001	0.001	0.001	0.57	0.355	2.17497	1.23575e-09	1.281e-08	-0.325887	0.465928	0.80865	0.132415	0.279618	0.612225	0	1	1	9.15482	0.500038	0.902459	8.47168	1	1	-14.24	2.06924e-22	1.05228e-20	-5.16005	2.00997e-21	8.19438e-20	-6.06548	2.0349e-19	1.34404e-17
Zm00001eb028140	12.09	33.39	41.535	34.25	31.865	35.355	9.85	11.015	11.01	8.895	11.61	10.64	1.50229	2.26048e-09	2.24633e-08	-0.0674434	0.94957	1	-0.232413	0.912641	1	-0.147129	1	1	0.0758985	1	1	-0.0493163	1	1	-1.94504	5.38761e-10	9.20262e-09	-1.4566	9.19705e-07	7.94143e-06	-1.73242	2.18239e-08	3.68363e-07
Zm00001eb028150	1.195	1.855	1.155	0.49	1.405	1.6	15.58	20.16	23	10.81	15.375	16.175	-1.28616	0.243876	0.365096	-0.400849	1	1	0.470179	0.557913	0.852977	-0.527329	0.254146	0.613697	-0.390909	0.172958	0.560708	-0.507868	0.0952426	0.459102	4.46344	5.53311e-11	1.08033e-09	3.45194	1.07302e-12	2.05732e-11	3.33762	3.46083e-09	6.71921e-08
Zm00001eb028160	7.29	8.69	21.555	75.67	67.88	104.465	55.135	11.13	29.62	78.385	29.035	114.59	3.37573	2.80183e-19	1.00501e-17	2.96556	2.96983e-25	9.48734e-23	2.27693	2.49936e-12	3.86746e-10	0.507609	0.0234089	0.133653	1.38334	0.00113371	0.0149231	1.95184	1.70607e-10	2.17056e-08	0.0508562	0.663453	0.843755	-1.22519	8.86325e-08	9.075e-07	0.133461	0.965074	1
Zm00001eb028170	81.305	24.48	26.575	22.785	24.89	22.735	22.05	25.41	27.63	22.825	23.185	25.27	-1.83526	2.38335e-17	6.90353e-16	0.0239627	0.723683	0.964837	-0.225155	0.956673	1	0.0498362	0.513033	0.855	-0.132205	0.58679	0.95656	-0.12881	0.649212	1	0.00253049	0.764243	0.913619	-0.102375	0.874432	0.967557	0.152511	1	1
Zm00001eb028220	42.92	20.63	21.215	15.535	15	17.485	19.4	19.735	19.29	15.46	15.545	15.835	-1.46613	3.12795e-09	3.04708e-08	-0.459781	0.216672	0.548748	-0.278967	0.84538	1	-0.327516	0.557573	0.884287	-0.344306	0.23734	0.661168	-0.284736	0.388617	0.871688	-0.00698192	0.81154	0.942002	0.0514881	0.746343	0.886156	-0.143001	0.406481	0.644847
Zm00001eb028290	45.975	20.135	16.235	14.365	17.34	15.775	16.325	17.025	17.19	15.635	15.03	12.96	-1.67829	2.15798e-12	3.3695e-11	-0.215602	0.720664	0.963069	-0.0414674	0.711254	0.947824	-0.0623038	0.83831	1	-0.17981	0.580903	0.952373	-0.407504	0.206684	0.680488	0.122221	0.513915	0.729527	-0.206259	0.605065	0.781421	-0.283574	0.233674	0.44981
Zm00001eb028310	21.635	9.125	8.59	9.145	8.05	6.35	10.185	9.455	10.37	7.29	7.99	8.465	-1.24231	8.13972e-06	4.39552e-05	-0.180836	0.91974	1	-0.435902	0.628529	0.898995	-0.482455	0.40494	0.773363	-0.242882	0.571144	0.94803	-0.292834	0.461212	0.926708	-0.327064	0.625323	0.81586	-0.0107933	1	1	0.414753	0.59734	0.808264
Zm00001eb028390	16.1	16.415	27.815	51.185	39.18	55.48	13.48	11.76	13.005	23.9	14.84	21.295	1.66866	3.45602e-12	5.24309e-11	1.2551	1.15647e-06	2.53822e-05	0.996105	3.93637e-05	0.000820608	0.82619	0.000771734	0.00904533	0.335603	0.399683	0.832861	0.711448	0.0240284	0.192839	-1.09871	3.91655e-05	0.000295276	-1.40063	9.65761e-08	9.83197e-07	-1.38145	1.01765e-06	1.29051e-05
Zm00001eb028420	263.07	3713.34	3618.55	2431.16	2366.16	2986.88	2512.17	2541.01	2623.36	1941.72	2133.64	2052.41	3.20813	1.2534e-32	1.54085e-30	-0.650167	0.00558768	0.039789	-0.276772	0.762171	0.973476	-0.371595	0.380952	0.75493	-0.252085	0.279715	0.709036	-0.354091	0.165747	0.614543	-0.324306	0.394029	0.619858	-0.149231	0.583248	0.763889	-0.541317	0.0101952	0.0412992
Zm00001eb028440	181.73	33.06	26.26	26.4	29.035	20.955	19.05	10.855	21.3	16.55	18.835	15.37	-2.78319	2.08438e-33	2.72897e-31	-0.187294	0.732122	0.96854	-0.325572	0.650744	0.913338	-0.20296	0.898216	1	0.795056	0.020423	0.142317	-0.470736	0.120946	0.52422	-0.673707	0.034222	0.102494	-0.624377	0.028079	0.0786876	-0.447177	0.0702234	0.189575
Zm00001eb028450	2.57	1.39	1.755	2.045	1.71	2.01	3.98	4.31	5.325	4.53	5.16	4.785	-0.329668	0.727653	0.82914	0.298911	0.795063	0.994595	0.195724	0.790679	0.985734	0.186743	0.645821	0.932535	0.259683	0.747649	1	-0.154263	0.881317	1	1.14741	0.0497749	0.137445	1.59337	0.00260019	0.0103042	1.25132	0.119573	0.278899
Zm00001eb028680	16.275	19.155	14.35	12.45	8.925	8.34	16.87	12.01	9.25	12.555	3.965	9.075	-0.386512	0.15255	0.250912	-1.1018	0.00626839	0.0437117	-0.782931	0.104983	0.350294	-0.426198	0.40634	0.774756	-1.59884	0.000863833	0.0118993	-0.0275557	1	1	0.0121163	0.77862	0.922758	-1.17053	0.00764138	0.0262168	0.12185	1	1
Zm00001eb028690	38.18	14.335	19.69	12.26	12.94	11.97	16.495	11.95	16.82	8.755	14.425	17.15	-1.63886	2.44229e-11	3.25618e-10	-0.147704	0.880763	1	-0.71804	0.113259	0.36721	-0.91385	0.0211767	0.124634	0.271561	0.489338	0.902459	0.0280309	1	1	-0.48578	0.269816	0.484058	0.156734	0.507482	0.698792	0.518785	0.326718	0.561467
Zm00001eb028760	2.855	1.475	1.925	4.625	3.775	0.665	1.715	0.001	1.74	1.32	1.325	1.115	0.695963	0.21447	0.329881	1.35576	0.061593	0.244048	-1.53343	0.348279	0.686107	-0.377671	1	1	10.3718	0.0666592	0.315865	-0.642044	0.798263	1	-1.80892	0.0132197	0.0471719	-1.51048	0.0471445	0.120023	0.745617	1	1
Zm00001eb028770	51.2	41.645	35.975	138.725	107.24	50.66	19.865	4.91	7.265	31.865	8.82	5.095	1.43801	0.00166093	0.00531486	1.36463	0.232113	0.571425	0.493852	0.297602	0.631673	0.681744	0.0259992	0.144883	0.845056	0.0988382	0.406772	-0.511881	0.292025	0.784923	-2.12218	1.92489e-05	0.000155508	-3.60392	0.0054209	0.0194494	-3.31369	6.62669e-07	8.65927e-06
Zm00001eb028830	0.001	0.001	0.001	0.001	0.001	0.001	13.85	13.875	6.705	9.45	14.23	19.245	0	1	1	0	1	1	0	1	1	-0.5515	0.232177	0.587565	0.0364479	1	1	1.52117	0.0323542	0.234821	13.2061	9.69805e-13	2.29163e-11	13.7966	6.24178e-19	2.08983e-17	14.2322	7.79308e-17	3.99685e-15
Zm00001eb028840	0.001	0.001	0.001	0.001	0.001	0.001	12.225	11.11	11.88	8.5	23.4	31.43	0	1	1	0	1	1	0	1	1	-0.5243	0.808652	1	1.07465	0.184589	0.5798	1.40361	0.0863617	0.434807	13.0532	0.000480967	0.00273499	14.5142	4.30315e-31	3.21955e-29	14.9399	2.13339e-24	2.15918e-22
Zm00001eb028850	0.32	0.001	0.001	1.72	2.475	2.4	0.001	0.001	0.001	0.001	0.49	0.355	2.42626	0.0461584	0.093542	11.2732	0.000577018	0.00608707	11.2288	0.00278181	0.0262585	0	1	1	8.93664	0.500038	0.902459	8.47168	1	1	-10.7482	0.00953272	0.0357882	-2.33657	0.0391825	0.103585	-2.75714	0.0256572	0.0864377
Zm00001eb028860	14.845	18.5	31.75	39.96	31.515	44.785	34.775	28.125	37.475	33.305	29.74	46.005	1.42858	1.31677e-06	8.19964e-06	0.768513	0.00488033	0.0358247	0.496259	0.0338481	0.167795	-0.0623117	0.775825	0.994045	0.0805516	0.874082	1	0.295862	0.32058	0.812323	-0.262818	0.528191	0.740874	-0.083634	0.940054	1	0.0387751	0.740268	0.9081
Zm00001eb028890	10.54	3.37	4.03	4.44	3.41	3.78	5.95	6.725	5.42	5.18	5.845	4.795	-1.24724	0.00101735	0.00344444	0.0170231	1	1	-0.0923936	1	1	-0.199938	1	1	-0.202331	0.787668	1	-0.176762	0.76929	1	0.222392	0.51068	0.726721	0.777431	0.0977934	0.214599	0.343145	0.880629	0.990572
Zm00001eb028920	4.85	6.88	6.66	10.21	9.235	11.295	7.34	5.575	6.06	9.685	8.105	10.32	1.07393	0.00428704	0.0122497	0.424703	0.219579	0.552509	0.76209	0.0330112	0.164936	0.399972	0.171724	0.495639	0.53984	0.311807	0.74484	0.768053	0.0685603	0.377234	-0.0761589	1	1	-0.1883	0.77182	0.904221	-0.130241	0.600372	0.809997
Zm00001eb028990	0.001	0.29	0.775	1.295	1.2	0.001	2.93	1.695	0.62	1.085	0.95	1.22	10.3387	0.0103956	0.0263487	2.04891	0.129466	0.399561	-9.59805	0.255258	0.58218	-1.43321	0.160796	0.475414	-0.835286	0.55247	0.933831	0.976541	0.473391	0.933475	-0.255257	1	1	-0.337035	1	1	10.2527	0.0802932	0.207944
Zm00001eb029010	52.805	110.78	111.18	107.41	102.79	119.625	116.965	87.68	119.77	109.42	94.34	142.89	1.02438	3.79419e-06	2.17541e-05	-0.107998	0.935961	1	0.105622	0.234342	0.557361	-0.0962004	0.840016	1	0.105622	0.733617	1	0.254638	0.224608	0.705516	0.0267481	0.56845	0.772714	-0.123758	0.733565	0.87611	0.256386	0.707509	0.885234
Zm00001eb029020	136.135	57.19	53.15	87.3	46.54	41.245	158.3	51.405	121.175	123.16	67.6	94.945	-0.640984	0.000889016	0.00305097	-0.297292	0.399372	0.753796	-0.36585	0.562221	0.85636	-0.362127	0.276915	0.640752	0.395115	0.173668	0.562066	-0.351928	0.137078	0.556495	0.49648	0.00589784	0.0237772	0.538552	0.00347818	0.013273	1.20287	0.000275493	0.00195184
Zm00001eb029040	21.175	30.11	23.69	30.115	42.255	20.345	19.005	29.665	17.05	27.41	63.225	34.765	0.50812	0.0815368	0.150376	0.488879	0.0286911	0.14077	-0.219604	0.954443	1	0.528323	0.0136298	0.0903963	1.09173	9.62058e-06	0.000261047	1.02786	9.32102e-05	0.002494	-0.13578	0.938756	1	0.581373	0.00369283	0.0139825	0.772961	0.0477297	0.139997
Zm00001eb029050	85.06	220.24	102.015	280.055	261.42	55.17	178.09	57.1	93.785	120.645	153.595	119.215	1.71916	3.12998e-14	6.15766e-13	0.247293	0.198432	0.521081	-0.886825	0.00772926	0.056958	-0.561838	0.184995	0.518564	1.42757	8.1008e-06	0.000225439	0.346137	0.54314	0.963347	-1.21494	2.34052e-06	2.25935e-05	-0.767238	0.0205599	0.0606561	1.11161	0.030321	0.0988104
Zm00001eb029150	1.145	0.001	2.965	0.605	2	2.14	0.001	0.001	0.001	0.001	0.001	0.001	-0.920341	0.639295	0.756061	10.9658	0.00575659	0.0407699	-0.470421	0.863423	1	0	1	1	0	1	1	0	1	1	-9.24079	0.264005	0.476734	-10.9658	0.00313165	0.0120936	-11.0634	0.0361989	0.113503
Zm00001eb029200	414.56	555.62	354.96	495.735	497.735	310.655	406.87	448.655	484.545	564.35	644.27	667.875	0.257988	0.265615	0.388924	-0.158721	0.769919	0.985506	-0.192343	0.991177	1	0.472022	0.0021448	0.0210391	0.522059	0.0211271	0.145698	0.462947	0.024538	0.195415	0.187021	0.183633	0.369348	0.372288	0.0440573	0.113863	1.10426	0.000705179	0.00441866
Zm00001eb029390	24.21	25.785	35.76	53.035	25.625	35.3	36.145	14.54	30.495	32.855	16.55	33.54	1.13134	6.53571e-07	4.32056e-06	-0.00898004	0.769908	0.985506	-0.0186786	0.513815	0.822306	-0.137683	1	1	0.186804	0.632756	0.978699	0.13731	0.584065	0.982666	-0.690832	0.0106509	0.0392641	-0.630721	0.0167154	0.0508542	-0.0737855	0.442161	0.679502
Zm00001eb029400	24.215	32.785	24.625	23.1	20.375	21.1	0.001	0.001	0.001	0.001	0.265	0.001	-0.0680082	0.745747	0.84388	-0.686236	0.0825914	0.297789	-0.222881	0.940484	1	0	1	1	8.04985	1	1	0	1	1	-14.4956	3.45249e-19	1.4475e-17	-6.26466	5.67364e-16	1.50613e-14	-14.365	6.60963e-13	2.17204e-11
Zm00001eb029410	4.155	11.225	3.57	6.015	3.98	4.175	0.001	0.001	0.245	0.55	0.001	0.001	0.533716	0.326374	0.456986	-1.49588	0.0190931	0.103914	0.225852	0.527033	0.832089	9.10329	0.254934	0.614627	0	1	1	-7.93664	1	1	-3.45106	0.000166897	0.00107722	-11.9586	7.36297e-05	0.000431359	-12.0276	0.000199824	0.00148532
Zm00001eb029440	2.3	0.001	0.001	1.645	1.87	0.001	1.235	0.99	0.67	2.17	1.375	1.66	-0.483546	0.567957	0.693719	10.8688	0.00714177	0.0482923	0	1	1	0.813184	0.446797	0.810755	0.473931	1	1	1.30895	0.348548	0.841366	0.399607	0.762652	0.912515	-0.443607	0.820013	0.935556	10.697	0.0402884	0.123122
Zm00001eb029460	1.005	3.52	2.46	4.125	5.73	5.565	1.25	4.75	3.58	0.25	4.565	2.095	2.0372	0.00284992	0.00855107	0.70296	0.256684	0.602384	1.17772	0.0202637	0.116724	-2.32193	0.218857	0.568832	-0.0573127	1	1	-0.773009	0.298641	0.791396	-4.04439	5.10902e-05	0.000374004	-0.32792	0.603171	0.780084	-1.40943	0.0146463	0.0552176
Zm00001eb029530	11.97	17.365	5.93	6.575	8.315	8.475	16.185	18.245	16.325	5.17	10.67	13.07	-0.86436	0.0731438	0.137621	-1.06239	0.192939	0.512403	0.515181	0.361776	0.698775	-1.64642	6.7796e-05	0.00114081	-0.773941	0.0131202	0.102524	-0.320824	0.349527	0.842149	-0.346827	0.747455	0.9023	0.359772	0.601556	0.778766	0.624974	0.490694	0.723577
Zm00001eb029590	10.675	5.215	1.75	3.035	1.245	1.08	1.58	0.001	0.535	0.325	0.435	0.001	-1.81447	1.75437e-05	8.86152e-05	-2.06652	0.00652309	0.0449689	-0.696324	1	1	-2.28141	0.0838298	0.319448	8.76487	0.500038	0.902459	-9.0634	0.50544	0.944807	-3.22318	0.00397219	0.0170604	-1.51706	0.295879	0.486442	-10.0768	0.0730869	0.194562
Zm00001eb029640	7.115	10.04	6.945	10.18	8.36	1.81	6.41	2.82	4.5	4.255	4.915	6.945	0.516802	0.173039	0.277243	-0.264184	0.64314	0.920425	-1.93998	0.00313565	0.0288547	-0.591165	0.414545	0.784493	0.801496	0.215879	0.6308	0.62605	0.213019	0.691432	-1.25851	0.00560363	0.0227729	-0.766312	0.0757513	0.175564	1.93998	0.00737744	0.0315966
Zm00001eb029660	4.505	10.565	6.095	12.1	6.555	2.75	7.695	2.815	7.395	12.72	7.6	8.535	1.42541	0.000298785	0.00115241	-0.688625	0.218972	0.551954	-1.14819	0.118675	0.376481	0.725105	0.0624792	0.265399	1.43286	0.00813177	0.0712514	0.206841	0.729007	1	0.0720916	0.677753	0.853461	0.213404	0.633608	0.802762	1.63396	0.0135205	0.0517973
Zm00001eb029690	6.445	3.085	2.2	2.135	0.54	1.98	6.885	4.105	5.975	2.86	1.435	1.59	-1.59394	0.0287557	0.0627212	-2.51424	0.00510169	0.0370443	-0.152003	1	1	-1.26744	0.0500911	0.227595	-1.51633	0.0415393	0.233796	-1.90991	0.00220649	0.0326495	0.421779	0.598536	0.795539	1.41002	0.354612	0.550721	-0.316474	0.809836	0.950489
Zm00001eb029740	5.485	5.505	3.985	2.945	1.745	1.79	14.355	9.425	13.45	11.21	8.77	8.18	-0.897224	0.101449	0.180883	-1.65752	0.0167649	0.0943638	-1.15462	0.188703	0.494558	-0.356767	0.523073	0.860965	-0.103916	0.823881	1	-0.717433	0.0499416	0.311186	1.92845	2.91049e-05	0.000226053	2.32935	1.03221e-05	7.28145e-05	2.19214	0.00406652	0.0193291
Zm00001eb029750	3.555	1.325	2.29	0.91	1.395	2.705	10.045	8.075	10.64	6.135	8.295	7.665	-1.96591	0.0116268	0.029031	0.0742728	1	1	0.240281	0.650851	0.91336	-0.711342	0.161296	0.47642	0.0387797	1	1	-0.47314	0.227073	0.707926	2.75312	3.11097e-05	0.000240021	2.57198	1.77293e-06	1.45668e-05	1.50266	0.0198034	0.070462
Zm00001eb029870	0.695	1.73	1.985	1.98	1.825	1.16	10.68	6.515	8.515	5.305	8.57	9.68	1.51042	0.089968	0.163597	0.0771244	1	1	-0.775014	0.774554	0.978364	-1.00949	0.0348422	0.177163	0.39553	0.388418	0.82071	0.185001	0.663985	1	1.42185	0.00655021	0.0260074	2.2314	4.96059e-06	3.76354e-05	3.06088	6.8712e-06	7.36303e-05
Zm00001eb029940	16.3	3.79	4.065	6.51	8.51	2.73	3.685	2.185	2.96	11.27	6.505	7.025	-1.32414	0.000138531	0.000579556	1.16696	0.00776731	0.0514225	-0.574354	0.701509	0.942497	1.61275	0.000105313	0.00167475	1.57392	0.0130369	0.102179	1.2469	0.020956	0.174325	0.791758	0.0177907	0.0601547	-0.38761	0.398127	0.594815	1.3636	0.0448667	0.133562
Zm00001eb029990	7.515	15.805	10.2	11.2	10.865	2.765	8.76	6.63	6.605	5.23	5.74	6.945	0.575654	0.111707	0.195172	-0.540693	0.174396	0.483219	-1.88322	0.00052091	0.00695878	-0.74412	0.253085	0.612328	-0.207958	0.69788	1	0.0724161	1	1	-1.09862	0.0250985	0.0795733	-0.920566	0.0240657	0.0690653	1.3287	0.0660177	0.180788
Zm00001eb030000	0.245	5.435	1.365	2.65	3.455	1.02	1.3	0.74	0.88	1.195	0.865	0.88	3.43514	0.000714426	0.00250499	-0.653594	0.365982	0.722084	-0.420332	1	1	-0.121501	1	1	0.225175	1	1	0	1	1	-1.14898	0.182726	0.368025	-1.99791	0.0241755	0.0692928	-0.212994	1	1
Zm00001eb030010	8.865	5.92	5.66	14.02	8.27	8.255	6.015	3.405	4.135	5.705	5.395	5.945	0.661294	0.0789233	0.146329	0.48229	0.249082	0.593831	0.544466	0.105318	0.350841	-0.0763379	1	1	0.663968	0.323025	0.759455	0.523789	0.365141	0.854388	-1.29719	0.00599245	0.0240968	-0.616264	0.256098	0.439688	-0.473591	0.231011	0.446197
Zm00001eb030030	10.31	14.475	10.695	7.195	5.595	2.99	6.43	4.295	5.29	3.685	3.555	1.53	-0.518978	0.11144	0.194822	-1.37135	0.00526513	0.0379676	-1.83872	0.000840557	0.010356	-0.803154	0.229292	0.584045	-0.272809	0.734985	1	-1.78974	0.00938297	0.0989261	-0.96533	0.0665862	0.173125	-0.654289	0.236864	0.41682	-0.966614	0.243735	0.462188
Zm00001eb030040	0.001	0.001	0.001	1.11	0.75	0.955	5.44	1.67	3.785	0.525	0.705	1.14	10.1163	0.0474646	0.0958184	9.55075	0.134865	0.409987	9.89936	0.125077	0.385348	-3.37322	0.000196478	0.00285701	-1.24415	0.581402	0.952415	-1.73126	0.300892	0.793633	-1.08017	0.769837	0.916782	-0.0892673	1	1	0.255461	1	1
Zm00001eb030050	23.43	26.13	41.55	46.935	43.385	81	36.23	25.08	37.165	41.345	30.725	44.075	1.00231	8.37946e-06	4.51474e-05	0.731489	0.00125626	0.0117045	0.963073	1.7989e-05	0.000421679	0.190528	0.17031	0.492668	0.292876	0.316424	0.750644	0.246016	0.302919	0.795035	-0.182951	0.728476	0.889975	-0.497783	0.0434375	0.112631	-0.877961	0.000192453	0.00143896
Zm00001eb030090	5.81	9.735	10.255	7.69	8.145	5.05	9.845	9.525	13.88	11.58	11.795	13.795	0.404445	0.372174	0.505465	-0.257266	0.698548	0.951163	-1.02197	0.0509591	0.22014	0.234172	0.321882	0.692852	0.308384	0.476819	0.893458	-0.00886211	1	1	0.59058	0.0499988	0.137992	0.534189	0.0730962	0.170443	1.44979	0.00475832	0.0220311
Zm00001eb030100	16.265	11.59	9.945	5.45	6.62	7.925	11.425	10.35	9.875	9.92	10.69	10.15	-1.57744	1.78958e-06	1.08977e-05	-0.807977	0.120698	0.384241	-0.32756	0.758965	0.972259	-0.203782	0.865328	1	0.0466311	1	1	0.0396271	1	1	0.864084	0.0221688	0.0717944	0.691359	0.0767049	0.177299	0.356997	0.718089	0.892378
Zm00001eb030110	1.195	2.545	3.04	4.125	7.435	7.12	1.96	1	1.32	1.805	3.29	3.13	1.78738	0.0208856	0.0477883	1.54667	0.00883018	0.056663	1.22781	0.0836373	0.300807	-0.118855	1	1	1.71809	0.0964756	0.401228	1.24562	0.0997658	0.470102	-1.1924	0.115845	0.263431	-1.17625	0.0356961	0.0960546	-1.18571	0.117542	0.275365
Zm00001eb030170	0.87	1.485	1.315	7.73	6.885	4.18	1.775	1.72	1.125	5.97	2.45	2.185	3.15138	7.99759e-09	7.36088e-08	2.21299	0.000126549	0.00166455	1.66844	0.0119486	0.0791057	1.74991	0.0015657	0.0162091	0.510373	0.629281	0.976851	0.957708	0.427793	0.904871	-0.372737	0.5892	0.789115	-1.49067	0.00512375	0.0185359	-0.93587	0.108361	0.258872
Zm00001eb030190	12.495	26.12	49.83	78.74	103.37	142.72	22.24	42.125	55.055	93.465	47.065	53.965	2.65575	9.92871e-18	2.99865e-16	1.98459	2.3276e-11	1.2608e-09	1.5181	2.5866e-05	0.000574842	2.07127	3.40809e-19	5.94358e-17	0.159978	0.617387	0.971846	-0.0288496	0.917102	1	0.24733	0.179374	0.362765	-1.13509	4.1635e-05	0.000259529	-1.40309	0.000118181	0.000937629
Zm00001eb030220	17.345	21.635	14.82	53.295	36.395	24.05	16.49	28.54	22.255	56.015	59.46	34.54	1.61948	9.61044e-13	1.57774e-11	0.750373	0.00140644	0.0128028	0.698491	0.00388111	0.0342475	1.76422	2.08758e-12	1.65383e-10	1.05893	1.65616e-05	0.000411687	0.634139	0.0118337	0.116913	0.071813	0.491452	0.711664	0.708179	0.000264069	0.00136678	0.522231	0.226138	0.439335
Zm00001eb030230	2.075	2.995	3.805	7.22	6.275	4.47	1.285	3.05	2.06	6.215	7.825	2.575	1.79889	0.000204385	0.000820328	1.06706	0.0692425	0.264456	0.232378	0.487597	0.809785	2.27399	0.000472383	0.00599652	1.35928	0.0289806	0.182008	0.321928	0.820204	1	-0.216244	0.837382	0.953983	0.318475	0.537847	0.724546	-0.795702	0.185956	0.383463
Zm00001eb030550	210.7	90.15	93.32	126.72	63.34	93.355	75.155	69.87	64.265	69.25	41.245	18.865	-0.733546	0.00201473	0.00630673	-0.509211	0.123273	0.38919	0.000540986	0.466486	0.792806	-0.118055	0.955125	1	-0.760454	0.00677802	0.0626084	-1.76832	1.09098e-08	9.47e-07	-0.871758	0.00108363	0.00559142	-0.618898	0.0335424	0.0911744	-2.30702	8.45069e-16	3.85833e-14
Zm00001eb030560	0.001	0.001	0.001	0.001	33.12	0.001	103.745	96.88	33.14	94.555	24.79	26.085	0	1	1	15.0154	1.65983e-05	0.000280882	0	1	1	-0.133816	1	1	-1.96644	0.0574009	0.290865	-0.345353	0.769369	1	16.5289	6.29745e-63	4.67918e-60	-0.417944	0.820751	0.936032	14.6709	5.22659e-21	4.06787e-19
Zm00001eb030590	1.455	3.685	0.001	4.275	0.88	0.795	0.001	0.001	0.001	0.001	0.001	0.001	1.55491	0.0558838	0.109966	-2.06609	0.0180835	0.0998947	9.63481	0.257539	0.584186	0	1	1	0	1	1	0	1	1	-12.0617	5.11262e-05	0.000374165	-9.78136	0.135484	0.275734	-9.63481	0.283633	0.510429
Zm00001eb030620	0.001	0.001	0.001	1.365	0.001	0.001	0.001	0.001	0.001	0.001	1.85	0.001	10.4147	0.0204001	0.0468412	0	1	1	0	1	1	0	1	1	10.8533	0.0243129	0.160705	0	1	1	-10.4147	0.0383663	0.111744	10.8533	0.0185681	0.0555383	0	1	1
Zm00001eb030650	0.001	0.001	0.001	2.025	3.45	1.485	0.365	0.405	0.001	5.42	3.34	1.355	10.9837	0.00116409	0.00388055	11.7524	3.78948e-05	0.000583179	10.5362	0.0581143	0.240602	3.89232	4.70484e-06	0.000106494	3.04385	0.00426865	0.0432437	10.4041	0.0662517	0.369705	1.42037	0.0136284	0.0483546	-0.0467483	1	1	-0.13217	1	1
Zm00001eb030670	0.75	5.43	5.895	3.05	4.265	5.97	2.14	2.855	3.725	2.17	5.035	3.34	2.02385	0.00584267	0.0159648	-0.348406	0.688866	0.946195	0.0182391	0.690353	0.936385	0.0200842	1	1	0.818501	0.230883	0.652701	-0.157392	0.854607	1	-0.491114	0.578091	0.779954	0.239446	0.597184	0.775242	-0.837883	0.0968199	0.238935
Zm00001eb030690	3.14	2.115	2.745	3.29	2.555	0.765	4.5	2.985	11.24	0.685	4.085	3.06	0.067323	1	1	0.272666	0.689289	0.946325	-1.84327	0.0940928	0.325228	-2.71575	0.0024552	0.0235941	0.452605	0.623511	0.976683	-1.87704	4.01814e-05	0.00124003	-2.26391	0.0199674	0.0660207	0.677013	0.282767	0.471465	2	0.0545724	0.155509
Zm00001eb030710	17.78	32.945	37.55	37.37	40.905	38.16	33.39	26.09	39.485	41.445	34.315	43.725	1.07163	8.75301e-06	4.69379e-05	0.312218	0.123047	0.389021	0.0232483	0.404301	0.7389	0.311782	0.0737493	0.294963	0.395342	0.14402	0.505421	0.147154	0.538268	0.960415	0.149317	0.320196	0.542771	-0.253438	0.386702	0.584523	0.196397	0.922001	1
Zm00001eb030730	20.85	31.155	30.5	50.74	45.725	44.47	36.6	26.74	24.01	57.555	47.62	39.5	1.28308	1.03105e-07	7.92658e-07	0.553519	0.0117671	0.0714555	0.544023	0.00411773	0.0356696	0.653098	0.0100142	0.0715867	0.832568	0.00100608	0.0134881	0.718217	0.00405006	0.0522962	0.181818	0.274391	0.490158	0.0585845	0.588778	0.767866	-0.17098	0.238084	0.455849
Zm00001eb030740	12.955	18.265	18.235	36.325	29.795	25.685	25.07	22.93	17.955	42.995	40.34	30.27	1.48745	3.02948e-09	2.95996e-08	0.705988	0.00729683	0.0490493	0.494216	0.0211459	0.120656	0.778207	0.00139697	0.0148176	0.814975	0.00166567	0.0203319	0.753503	0.00605268	0.0710048	0.243206	0.15478	0.325746	0.437141	0.0401561	0.105719	0.236963	0.79767	0.945193
Zm00001eb030860	23.105	10.645	8.145	6.945	4.545	6.975	0.001	0.001	0.001	0.001	0.001	0.001	-1.73416	0.00219146	0.0067853	-1.22782	0.143548	0.42715	-0.223721	1	1	0	1	1	0	1	1	0	1	1	-12.7618	3.84051e-05	0.000290197	-12.1501	0.00200332	0.00823243	-12.768	2.90438e-05	0.000272214
Zm00001eb030930	12.81	2.34	2.765	1.305	1.23	0.97	2.625	1.79	2.62	1.1	0.585	1.475	-3.29515	5.16792e-12	7.58956e-11	-0.92785	0.459385	0.805221	-1.51122	0.179881	0.480029	-1.25481	0.210393	0.557086	-1.61345	0.179835	0.570484	-0.828852	0.342948	0.835954	-0.246546	1	1	-1.07215	0.510946	0.701794	0.604658	0.765581	0.924185
Zm00001eb030970	27.205	26.645	19.48	12.895	15.545	14.62	19.05	25.93	17.015	8.245	15.5	15.15	-1.07706	7.84088e-05	0.000346696	-0.777414	0.0270427	0.134607	-0.41405	0.537078	0.839913	-1.2082	0.000752715	0.00885838	-0.742354	0.00658262	0.0611719	-0.167489	0.655856	1	-0.64522	0.135595	0.295241	-0.0041824	0.899014	0.981141	0.0513745	0.789599	0.939719
Zm00001eb031090	0.455	10.675	7.865	14.295	10.87	5.98	9.025	14.995	4.3	20.32	8.715	3.525	4.9735	2.8682e-18	9.23785e-17	0.0261159	0.812454	0.999691	-0.395301	0.699855	0.942497	1.1709	6.77399e-05	0.00114078	-0.782909	0.0407107	0.230526	-0.286713	0.729809	1	0.50739	0.0409394	0.117448	-0.318779	0.527689	0.716524	-0.762522	0.0889684	0.223897
Zm00001eb031100	0.935	2.045	1.585	6.58	7.26	3.61	0.775	0.001	0.865	0.705	1.62	2.505	2.81505	0.000320376	0.00122504	1.82787	0.0195858	0.105799	1.18752	0.114195	0.369126	-0.136573	1	1	10.6618	0.0156496	0.116097	1.53404	0.0983263	0.466199	-3.22239	0.000972609	0.00508926	-2.16398	0.0112388	0.0363865	-0.527188	0.519574	0.74435
Zm00001eb031150	40.35	44.965	95.26	58.88	61.325	63.88	41.83	39.285	49.73	35.3	29.545	39.37	0.545209	0.17528	0.280116	0.447673	0.161091	0.460446	-0.576506	0.337378	0.675833	-0.24487	0.65875	0.93965	-0.411065	0.0727074	0.335205	-0.33702	0.140648	0.565248	-0.738109	0.0587135	0.156677	-1.05356	0.00679353	0.0236379	-0.698268	0.0270377	0.0902205
Zm00001eb031170	3.435	6.18	5.75	7.755	7.76	2.315	4.65	1.205	4.115	2.925	2.39	3.95	1.17482	0.0136483	0.0332947	0.32845	0.399533	0.75391	-1.31255	0.0712037	0.271653	-0.668794	0.428968	0.795684	0.987977	0.331635	0.768221	-0.0590398	1	1	-1.40669	0.013654	0.0484326	-1.69905	0.00170421	0.00713128	0.77084	0.493435	0.726261
Zm00001eb031190	26.45	13.535	9.285	15.175	12.1	2.51	5.5	3.84	5.445	7.37	5.515	3.35	-0.801571	0.000886003	0.00304142	-0.161688	0.840644	1	-1.88721	0.00135161	0.0150995	0.422233	0.277938	0.642547	0.522255	0.471026	0.88903	-0.700771	0.215629	0.6954	-1.04196	0.0221276	0.0716837	-1.13357	0.0039995	0.0150016	0.416474	0.860422	0.979863
Zm00001eb031200	0.001	0.001	0.001	0.001	0.001	0.001	14.535	14.835	14.83	15.3	18.055	18.205	0	1	1	0	1	1	0	1	1	0.0740006	0.60672	0.913844	0.283393	0.399407	0.832536	0.295816	0.376366	0.864538	13.9012	2.1138e-16	7.0766e-15	14.1401	9.25285e-25	4.81238e-23	14.152	5.88391e-16	2.72379e-14
Zm00001eb031250	2.175	2.715	2.155	1.04	0.53	0.595	9.87	10.62	10.84	7.24	6.6	7.17	-1.06443	0.209069	0.323207	-2.35689	0.0149469	0.0862845	-1.85673	0.226829	0.546604	-0.44706	0.471319	0.829252	-0.686246	0.0780788	0.351031	-0.59632	0.178315	0.637288	2.79941	3.29124e-06	3.10538e-05	3.6384	5.09755e-07	4.59724e-06	3.59101	3.95098e-05	0.000357711
Zm00001eb031290	16.19	10.92	5.36	7.79	6.485	2.395	8.315	2.825	4.895	4.27	3.575	4.365	-1.05541	0.00044454	0.00163971	-0.751794	0.0955433	0.329155	-1.16221	0.0992573	0.336683	-0.96148	0.122848	0.405874	0.339692	0.690317	1	-0.165327	0.88637	1	-0.867387	0.117418	0.266103	-0.859163	0.0814636	0.18586	0.865956	0.315916	0.548607
Zm00001eb031310	25.105	34.875	26.705	25.745	26.82	11.075	27.94	21.3	28.31	18.66	17.765	14.08	0.0363175	1	1	-0.378884	0.235397	0.57631	-1.2698	0.000493795	0.00666841	-0.582383	0.159875	0.473451	-0.261816	0.382976	0.818559	-1.00766	0.0107564	0.109223	-0.464343	0.248106	0.458202	-0.594272	0.0288169	0.0804188	0.346341	0.758889	0.919859
Zm00001eb031330	216.825	151.385	186.45	221.53	168.45	224.66	165.945	136.625	122.62	220.885	104.98	108.825	0.030971	0.982199	1	0.154098	0.272815	0.622483	0.268954	0.118804	0.376499	0.41259	0.0169526	0.106199	-0.380107	0.0704306	0.327546	-0.172184	0.411728	0.889582	-0.00420663	0.677688	0.853419	-0.682206	0.00148966	0.00632336	-1.04573	7.44789e-05	0.000624993
Zm00001eb031410	7.165	11.37	8.27	9.61	13.565	8.85	1.35	1.78	0.92	0.88	1.285	0.235	0.42357	0.3299	0.460443	0.254657	0.305121	0.660159	0.0977901	0.495679	0.815753	-0.617384	0.754	0.984805	-0.470109	0.774516	1	-1.96897	0.379309	0.865307	-3.44896	1.60113e-07	1.92316e-06	-3.40005	1.03732e-11	1.74649e-10	-5.23494	7.07319e-09	1.30293e-07
Zm00001eb031480	1.015	2.305	3.365	4.88	5.705	9.665	0.001	0.001	0.001	0.001	0.001	0.001	2.2654	0.000360464	0.00135966	1.30746	0.0224368	0.117257	1.52216	0.000213067	0.00331183	0	1	1	0	1	1	0	1	1	-12.2527	5.57244e-07	6.079e-06	-12.478	2.54777e-07	2.42854e-06	-13.2386	1.6692e-10	3.9529e-09
Zm00001eb031510	19.565	19.475	18.515	12.795	13.58	9.98	21.35	22.76	23.875	17.42	21.24	24.29	-0.612695	0.018653	0.043389	-0.52014	0.157812	0.453812	-0.891583	0.0395445	0.18463	-0.293491	0.624877	0.923844	-0.0997168	0.652589	0.989238	0.0248618	0.955549	1	0.445164	0.0624836	0.164631	0.6453	0.00668422	0.0233183	1.28325	0.00178946	0.00973537
Zm00001eb031520	38.185	25.87	32.405	18.815	19.655	19.58	28.245	18.785	31.035	18.025	23.46	32.85	-1.02112	5.94244e-06	3.29109e-05	-0.396384	0.234278	0.574648	-0.726836	0.0568841	0.237475	-0.647996	0.05737	0.249667	0.320622	0.318916	0.754085	0.0819972	0.776967	1	-0.061884	0.952872	1	0.255307	0.211838	0.385493	0.746513	0.0519839	0.149603
Zm00001eb031580	4.575	3.27	3.53	5.73	10.45	22.965	3.765	5.23	3.9	3.995	3.36	5.06	0.324763	0.578912	0.703491	1.67614	0.000146002	0.00188535	2.7017	4.0515e-13	7.36524e-11	0.0855456	0.749418	0.983274	-0.63835	0.355575	0.794463	0.375663	0.648686	1	-0.52034	0.469082	0.691511	-1.63697	0.000177523	0.000956732	-2.18223	1.18906e-08	2.09883e-07
Zm00001eb031610	1.145	1.78	1.64	1.75	6.255	2.815	0.001	0.001	0.23	0.001	0.385	0.505	0.612007	0.644109	0.760174	1.81313	0.00134235	0.012331	0.779439	0.238323	0.562353	0	1	1	8.58871	0.500038	0.902459	1.13465	1	1	-10.7731	0.00518332	0.021324	-4.02208	7.05976e-07	6.208e-06	-2.47878	0.0184268	0.0666058
Zm00001eb031680	42.625	12.065	13.995	13.505	11.405	10.6	12.37	10.425	12.205	10.515	11.21	14.15	-1.65821	7.34111e-12	1.05561e-10	-0.0811615	1	1	-0.400847	0.594312	0.879875	-0.234397	0.79312	1	0.104739	0.920187	1	0.21333	0.57688	0.980251	-0.361045	0.436077	0.660159	-0.0248802	0.933128	1	0.416738	0.559344	0.777555
Zm00001eb031700	11.61	16.78	19.545	16.66	14.935	10.095	26.085	19.96	26.18	18.005	20.61	22.205	0.52102	0.0897588	0.163308	-0.168045	0.834951	1	-0.953159	0.0222026	0.124312	-0.534823	0.141232	0.438722	0.0462328	1	1	-0.237581	0.379036	0.865304	0.112009	0.470414	0.692727	0.464647	0.0436753	0.113109	1.13724	0.00608136	0.0269663
Zm00001eb031730	36.145	10.46	10.505	6.7	8.345	7.915	12.945	11.025	12.585	10.74	11.645	11.695	-2.43156	1.8354e-18	6.02254e-17	-0.325899	0.584966	0.888779	-0.408415	0.595652	0.880907	-0.269401	0.734397	0.97533	0.078932	1	1	-0.105813	0.786609	1	0.680761	0.0384917	0.112012	0.480727	0.115008	0.243402	0.563231	0.373178	0.611654
Zm00001eb031740	0.001	0.001	0.001	0.001	0.001	0.001	15.005	4.905	26.71	5.36	6.135	9.275	0	1	1	0	1	1	0	1	1	-1.48514	0.000810814	0.00941421	0.32281	0.662177	0.99575	-1.52596	0.000282447	0.00629238	12.388	8.87688e-08	1.10698e-06	12.5828	8.80485e-10	1.18037e-08	13.1791	3.96769e-09	7.60345e-08
Zm00001eb031760	0.81	3.265	6.725	5.11	6.31	5.295	1.475	2.145	3.01	2.085	3.72	4.12	2.65733	2.19123e-05	0.000108526	0.950557	0.0540185	0.222004	-0.344904	0.781009	0.98147	0.499332	0.505875	0.851485	0.794325	0.307894	0.739491	0.452881	0.503486	0.944807	-1.29328	0.0639238	0.167538	-0.762337	0.145333	0.291112	-0.361986	0.431228	0.669375
Zm00001eb031790	14.085	55.125	39.15	38.555	82.995	50.345	30.75	80.405	39.98	35.315	112.995	50.07	1.45276	4.86655e-09	4.59601e-08	0.590318	0.00362022	0.0281714	0.362836	0.0394052	0.184075	0.199695	0.22073	0.571567	0.490902	0.0503779	0.265969	0.324668	0.153373	0.588854	-0.126637	0.918902	0.999425	0.445163	0.00936686	0.031128	-0.00790205	0.560533	0.778811
Zm00001eb031830	2.915	0.75	4.455	2.585	6.285	18.09	0.001	0.001	0.001	0.001	0.001	0.001	-0.173332	0.882157	0.947184	3.06695	6.90246e-05	0.000990034	2.0217	8.6709e-06	0.000223743	0	1	1	0	1	1	0	1	1	-11.3359	0.000348698	0.00205448	-12.6177	2.83952e-08	3.10816e-07	-14.1429	3.97314e-13	1.34039e-11
Zm00001eb031840	15.155	14.955	55.285	23.77	135.275	387.98	26.835	21.695	19.265	15.555	29.23	52.33	0.649348	0.0427435	0.0878367	3.1772	3.39353e-20	6.34155e-18	2.81102	3.29059e-12	4.86035e-10	-0.786737	0.0232508	0.13296	0.430087	0.301141	0.732944	1.44166	1.95186e-05	0.000669201	-0.611764	0.0750461	0.189414	-2.21037	5.91733e-11	9.06726e-10	-2.89027	1.36987e-12	4.31518e-11
Zm00001eb031850	100.755	131.11	176.03	77.835	100.63	96.08	100.855	141.29	143.045	91.52	69.4	57.835	-0.37236	0.140948	0.235347	-0.381717	0.201742	0.526323	-0.873513	0.00760196	0.0563182	-0.140124	1	1	-1.02565	6.23264e-06	0.000178009	-1.30645	1.80504e-09	1.88903e-07	0.233668	0.218073	0.417913	-0.536053	0.0266173	0.075129	-0.732293	0.000987016	0.00591454
Zm00001eb031860	1.465	4.355	0.735	4.345	4.04	2.81	1.03	2.78	1.025	3.15	4.115	4.29	1.56846	0.0141564	0.034345	-0.108317	1	1	1.93475	0.035294	0.171721	1.61271	0.031027	0.16381	0.565808	0.442534	0.871991	2.06535	0.0115271	0.114979	-0.464004	0.54912	0.758425	0.0265371	1	1	0.610408	0.498636	0.730578
Zm00001eb031880	0.001	0.001	0.935	15.525	8.53	2.6	0.285	0.001	0.001	11.74	23.65	7.225	13.9223	2.13545e-21	9.65747e-20	13.0583	1.64733e-11	9.09231e-10	1.47547	0.0575498	0.239179	5.36433	4.33315e-11	2.68088e-09	14.5296	2.9714e-19	9.11556e-17	12.8188	5.27798e-08	3.94768e-06	-0.403161	0.395741	0.62159	1.47122	1.1691e-06	9.919e-06	1.47449	0.0310375	0.100689
Zm00001eb031890	0.16	0.001	0.001	0.001	0.001	0.001	82.275	100.19	113.88	59.835	73.67	70.585	-7.32193	1	1	0	1	1	0	1	1	-0.459464	0.161875	0.477232	-0.443589	0.0481398	0.258238	-0.690081	0.00119759	0.0205163	15.8687	3.17633e-53	1.24947e-50	16.1688	3.94558e-69	3.20249e-66	16.1071	9.6388e-41	4.58153e-38
Zm00001eb031940	0.555	2.005	2.385	23.785	10.96	5.77	0.375	0.001	1.3	4.255	1.915	1.375	5.42142	9.96959e-15	2.09345e-13	2.45057	3.11944e-07	7.77986e-06	1.27458	0.0177407	0.105594	3.5042	0.000126664	0.00195565	10.9031	0.00782892	0.0695323	0.08092	1	1	-2.48282	5.38601e-06	4.88374e-05	-2.51683	2.06651e-07	2.00476e-06	-2.06914	0.00156945	0.00876166
Zm00001eb031980	95.405	23.685	26.815	32.795	27.955	28.57	19.25	15.355	20.845	19.755	17.71	22.71	-1.54059	7.0943e-13	1.18472e-11	0.239133	0.209659	0.537986	0.0914608	0.33788	0.676332	0.0373594	0.543114	0.875659	0.205856	0.591364	0.959338	0.123626	0.704679	1	-0.731258	0.00976467	0.036462	-0.658542	0.0115233	0.0371874	-0.331173	0.116916	0.274119
Zm00001eb032000	24.225	40.75	52.11	22.905	17.62	28.92	61.63	46.125	59.395	26.195	19.545	37.855	-0.0808341	0.673467	0.785372	-1.20959	0.000231152	0.0027817	-0.849493	0.0233945	0.128848	-1.23434	2.12597e-06	5.21655e-05	-1.23875	5.31037e-07	2.01269e-05	-0.649858	0.00351751	0.04701	0.193629	0.307465	0.528967	0.149586	0.484725	0.678346	0.388416	0.464611	0.69969
Zm00001eb032010	4.295	2.79	4.445	8.225	7.01	7.9	9.055	5.19	3.49	10.86	5.72	2.08	0.937358	0.0203216	0.0466879	1.32915	0.00862201	0.0555589	0.829669	0.0357386	0.173494	0.262238	0.300487	0.669137	0.140281	1	1	-0.746644	0.302448	0.794991	0.400937	0.148717	0.316018	-0.293399	0.56608	0.749527	-1.92527	0.000447193	0.00299984
Zm00001eb032030	32.225	12.59	18.635	8.855	11.96	11.495	17.35	13.83	19.07	12.46	11.525	15.76	-1.86362	5.76412e-12	8.40386e-11	-0.0740609	1	1	-0.697008	0.134806	0.404293	-0.477632	0.281193	0.647134	-0.263034	0.48345	0.896792	-0.275037	0.348479	0.841366	0.49274	0.0881036	0.213777	-0.0534506	1	1	0.455261	0.420252	0.658365
Zm00001eb032060	188.2	79.73	85.955	74.825	77.57	71.24	87.22	81.58	83.1	72.005	73.345	71.645	-1.33067	4.18219e-11	5.40526e-10	-0.0396239	0.846823	1	-0.270894	0.785338	0.984645	-0.276562	0.549723	0.878044	-0.153517	0.452359	0.875314	-0.213982	0.327983	0.819386	-0.0554233	0.873255	0.974172	-0.0808002	0.924595	0.998439	0.00817851	0.590074	0.802585
Zm00001eb032100	0.001	0.001	0.001	0.001	0.001	0.001	96.53	113.595	99.8	75.02	85.95	84.945	0	1	1	0	1	1	0	1	1	-0.363702	0.309321	0.677874	-0.40233	0.0542211	0.279642	-0.232511	0.286697	0.779808	16.195	5.65761e-60	3.36301e-57	16.3912	1.40254e-76	3.7567e-73	16.3742	5.48455e-44	3.64969e-41
Zm00001eb032160	6.825	18.755	21.305	20.005	17.5	18.47	21.32	23.845	22.215	18.99	20.93	21.88	1.55146	6.90923e-07	4.54226e-06	-0.0999203	1	1	-0.206008	1	1	-0.166968	0.952299	1	-0.188114	0.440779	0.871508	-0.0219214	1	1	-0.0751207	1	1	0.258217	0.221663	0.397858	0.244429	0.82378	0.958129
Zm00001eb032230	190.265	352.705	216.62	265.085	437.66	371.02	161.12	293.42	198.965	166.94	264.57	183.07	0.478445	0.0236081	0.0531034	0.311349	0.0613648	0.243357	0.776331	0.000161572	0.00262684	0.0511941	0.392684	0.761144	-0.149318	0.41027	0.842311	-0.120119	0.548439	0.966208	-0.667125	0.0119788	0.043306	-0.726161	0.000103056	0.000585749	-1.0191	3.29117e-06	3.76793e-05
Zm00001eb032280	3.27	4.745	6.375	6.01	9.005	7.345	18.97	30.865	14.96	31.47	25.37	19.67	0.878074	0.066746	0.127563	0.924318	0.0192375	0.104547	0.204337	0.369899	0.707483	0.730257	0.00163515	0.0167875	-0.282848	0.26865	0.693528	0.394887	0.224416	0.70526	2.38854	1.75523e-14	4.87547e-13	1.49433	4.52249e-08	4.82609e-07	1.42116	0.00229044	0.0120037
Zm00001eb032290	500.3	758.76	425.25	908.69	707.37	305.615	474.75	287.77	449.46	652.44	648.27	591.865	0.860995	1.49173e-05	7.63656e-05	-0.101179	0.95027	1	-0.476596	0.455743	0.782995	0.458677	0.00837262	0.0621607	1.17168	1.28894e-05	0.000334099	0.397075	0.0378248	0.260492	-0.477943	0.0551457	0.149075	-0.12587	0.731049	0.874347	0.953553	0.0402625	0.123059
Zm00001eb032310	4.185	14.055	6.94	64.795	19.28	11.925	14.845	12.525	11.895	22.18	12.925	7.03	3.95258	3.82815e-42	1.10154e-39	0.456022	0.0677042	0.260559	0.780982	0.0830895	0.299874	0.579282	0.038194	0.188647	0.0453537	1	1	-0.758759	0.060393	0.350485	-1.54662	2.31215e-09	3.61682e-08	-0.576941	0.0860447	0.19418	-0.762393	0.12009	0.279835
Zm00001eb032340	295.615	119.68	109.875	173.16	190.2	210.835	98.545	113.035	99.03	113.515	103.21	78.47	-0.771614	4.73913e-05	0.000218476	0.668335	0.000619234	0.00644664	0.940251	7.49282e-06	0.000198759	0.204028	0.107237	0.37304	-0.131187	0.496216	0.902459	-0.335724	0.119548	0.520507	-0.609223	0.0172852	0.0588022	-0.881934	1.09755e-05	7.70382e-05	-1.4259	2.90184e-09	5.70045e-08
Zm00001eb032500	5.045	9.665	2.605	1.185	2.06	0.145	3.51	1.08	2.93	1.165	1.955	0.88	-2.08997	0.000556462	0.00200343	-2.23013	0.00149114	0.013429	-4.16716	0.0117632	0.0781798	-1.59114	0.041542	0.199017	0.856137	0.581243	0.952373	-1.73533	0.101692	0.4755	-0.0245571	1	1	-0.0754757	1	1	2.60145	0.656525	0.84926
Zm00001eb032520	44.685	15.61	28.82	58.175	61.8	160.315	64.13	41.045	39.145	42.24	43.12	47.125	0.380609	0.154447	0.253574	1.98514	9.69021e-08	2.74367e-06	2.47577	8.53875e-17	3.46833e-14	-0.60239	0.0744205	0.29678	0.0711507	0.898528	1	0.267665	0.408601	0.886675	-0.461789	0.163468	0.338414	-0.51925	0.0398219	0.104993	-1.76634	1.3402e-07	1.97091e-06
Zm00001eb032550	20.195	21.255	26.075	16.055	15.67	11.355	15.315	15.02	19.095	10.435	14.34	14.57	-0.330975	0.176993	0.282371	-0.439797	0.247652	0.591695	-1.19934	0.00171035	0.0180888	-0.553515	0.228263	0.582986	-0.0668398	0.867937	1	-0.390194	0.217981	0.698024	-0.621592	0.0928893	0.222324	-0.12796	0.891173	0.977252	0.359673	0.6681	0.858135
Zm00001eb032560	98.43	35.57	108.005	47.295	114.685	350.16	71.885	59.05	79.795	56.74	147.49	261.34	-1.05741	5.97758e-07	3.98988e-06	1.68894	5.6424e-07	1.33228e-05	1.69692	9.35641e-05	0.00166786	-0.341325	0.449177	0.812921	1.32061	0.000147021	0.00272475	1.71156	2.4283e-06	0.000112142	0.262678	0.137388	0.298102	0.36294	0.0838749	0.190212	-0.422086	0.248835	0.468675
Zm00001eb032580	86.515	35.185	107.465	45.705	112.085	345.64	85.24	68.91	93.585	69.285	172.44	305.55	-0.920598	2.3336e-05	0.000114989	1.67156	1.9491e-06	4.0949e-05	1.6854	8.66894e-05	0.00156716	-0.298988	0.542956	0.875604	1.32331	0.000157671	0.00288926	1.70706	4.25235e-06	0.000183027	0.600191	0.00463161	0.0194531	0.621501	0.00589552	0.0209182	-0.177862	0.511607	0.741356
Zm00001eb032600	149.57	181.85	264.4	425.235	900.3	2098.64	808.005	645.73	579.685	835.15	1432.96	1195.53	1.50744	3.03793e-05	0.000146363	2.30766	1.28681e-18	1.98032e-16	2.98866	9.99484e-13	1.68718e-10	0.0476711	0.533531	0.867983	1.15	7.06973e-05	0.00144816	1.0443	2.39222e-05	0.000792945	0.973775	0.00777642	0.0301597	0.670526	0.000185971	0.000996444	-0.81181	0.00436418	0.0205276
Zm00001eb032610	0.001	0.001	0.001	0.001	0.001	0.001	0.001	0.001	0.001	37.43	700.58	385.325	0	1	1	0	1	1	0	1	1	15.1919	5.9923e-06	0.00013129	19.4182	6.32772e-95	1.65002e-90	18.5557	5.39248e-56	1.39956e-51	15.1919	2.04558e-06	1.99698e-05	19.4182	1.94321e-132	2.60245e-128	18.5557	1.12294e-48	1.10705e-45
Zm00001eb032630	5.35	5.965	5.35	4.465	33.4	21.29	11.945	8.2	9.825	7.185	18.455	22.325	-0.260879	0.584697	0.708547	2.48525	1.34168e-13	1.01448e-11	1.99257	2.02332e-06	6.49116e-05	-0.733347	0.236066	0.592861	1.17032	0.00205985	0.0240972	1.18413	0.00148321	0.0242414	0.686328	0.0871713	0.212093	-0.855836	0.000962831	0.00432636	0.0684842	0.823678	0.958092
Zm00001eb032640	27.37	15.94	18.375	13.005	13.47	15.67	12.56	8.7	12.67	7.27	10.13	7.64	-1.07353	2.93963e-05	0.000142097	-0.242902	0.668483	0.934333	-0.229739	0.945841	1	-0.788809	0.0819475	0.315234	0.219547	0.669618	0.998982	-0.729772	0.0557099	0.334603	-0.839039	0.0410573	0.117749	-0.411116	0.251164	0.433775	-1.03636	0.00383516	0.0183737
Zm00001eb032650	1.195	0.725	0.27	0.29	3.71	1.98	12.17	21.645	14.205	5.33	16.39	12.29	-2.04289	0.122537	0.210747	2.35537	0.00557461	0.0397165	2.87447	0.0503084	0.218253	-1.19112	0.0348764	0.177247	-0.401218	0.150534	0.518314	-0.208914	0.560191	0.970987	4.20001	2.48625e-06	2.38796e-05	2.14332	3.88582e-09	4.81413e-08	2.63391	1.75447e-05	0.000173157
Zm00001eb032690	3271.89	5101.4	5366.05	5001.83	1982.31	3011.59	9447.84	5660.05	7725.94	4293.09	2010.67	3105.57	0.61233	0.00254322	0.00772112	-1.36371	4.53278e-09	1.66788e-07	-0.833335	0.011368	0.0765605	-1.13797	2.59571e-06	6.20511e-05	-1.49314	8.60118e-13	1.04806e-10	-1.31485	3.6816e-10	4.42359e-08	-0.22044	0.560111	0.766711	0.0204937	0.670351	0.830725	0.044335	0.680872	0.867088
Zm00001eb032850	1.03	1.595	1.145	8.71	8.495	5.87	1.83	0.805	1.145	8.1	4.62	2.83	3.08003	6.15619e-09	5.73481e-08	2.41306	8.38065e-06	0.00015121	2.35801	0.00025069	0.00380217	2.14608	3.98179e-05	0.000717025	2.52083	0.00383542	0.0398932	1.30545	0.22339	0.703834	-0.104751	1	1	-0.878721	0.0681512	0.161157	-1.05256	0.0629987	0.174278
Zm00001eb032870	1.785	1.3	1.095	4.485	3.595	4.155	0.635	0.001	0.001	1.105	0.89	0.765	1.32918	0.0551601	0.108754	1.46748	0.098598	0.3363	1.92392	0.00725765	0.0546339	0.799218	0.726646	0.971522	9.79766	0.125056	0.467948	9.57932	0.253178	0.741114	-2.02106	0.0149558	0.052165	-2.01411	0.0385818	0.102318	-2.44132	0.00297273	0.0149637
Zm00001eb032890	0.2	0.001	0.77	0.54	0.285	1.03	3.16	1.575	2.625	3.515	1.78	4.93	1.43296	0.630698	0.749453	8.15482	1	1	0.419714	1	1	0.1536	0.620961	0.921852	0.176525	1	1	0.90927	0.221387	0.701059	2.70249	0.00193732	0.00919635	2.64284	0.0228687	0.0662921	2.25894	0.018856	0.0676974
Zm00001eb032930	19.41	15.09	8.17	8.305	10.13	5.595	8.96	7.295	9.94	7.955	6.42	8.825	-1.22475	0.000402549	0.00149917	-0.574959	0.267215	0.615392	-0.546198	0.523277	0.829908	-0.171637	1	1	-0.184335	0.701965	1	-0.17165	0.677274	1	-0.0621182	1	1	-0.657989	0.121888	0.254643	0.657458	0.335355	0.571478
Zm00001eb032940	18.415	27.605	21.935	37.955	28.02	35.195	27.29	29.99	20.3	27.885	26.66	37.885	1.04341	3.54762e-05	0.000168501	0.0215274	0.695253	0.949134	0.682136	0.00232845	0.022963	0.0311169	0.562306	0.887325	-0.169805	0.460803	0.879513	0.900147	0.000692065	0.0131685	-0.444801	0.188806	0.376921	-0.0717802	0.963271	1	0.106256	0.889475	0.995084
Zm00001eb032960	3.595	0.72	0.8	2.87	1.975	4.075	0.42	1.57	1.535	2.345	1.09	0.425	-0.324941	0.559991	0.686005	1.45578	0.156328	0.45117	2.34873	0.0053058	0.0431975	2.48113	0.0245811	0.138681	-0.526436	0.753999	1	-1.8527	0.293805	0.787043	-0.291463	0.860521	0.966821	-0.857525	0.457734	0.653115	-3.26127	0.00464795	0.0216254
Zm00001eb033030	466.28	631.1	479.665	1314.39	969.73	655.87	698.375	740.945	745.735	1625.29	1120.12	707.945	1.49512	2.12031e-14	4.26423e-13	0.619714	0.00154113	0.0137984	0.451383	0.00914578	0.0647261	1.21862	3.44536e-12	2.595e-10	0.596208	0.0114635	0.0928524	-0.0750258	0.735131	1	0.306304	0.0372233	0.109152	0.207992	0.134906	0.274818	0.110227	0.854933	0.976603
Zm00001eb033040	8.01	8.03	9.765	7.67	7.93	7.655	13.28	11.715	15.925	11.685	13.295	20.475	-0.0625757	0.790351	0.878373	-0.0180791	1	1	-0.351218	0.738309	0.962655	-0.184597	1	1	0.182527	0.718113	1	0.36257	0.231981	0.714862	0.607359	0.0531259	0.144941	0.745491	0.0145264	0.0452639	1.41939	0.000964155	0.00579975
Zm00001eb033060	20.15	29.73	12.06	12.745	16.845	9.905	8.62	7.225	10.655	4.095	9.285	9.82	-0.660848	0.0109675	0.0275953	-0.819599	0.0171912	0.096102	-0.284001	0.854565	1	-1.07382	0.0652992	0.272403	0.361904	0.502434	0.902459	-0.117736	0.858856	1	-1.638	0.000219396	0.00137086	-0.859347	0.00834477	0.0282215	-0.012434	0.805531	0.948816
Zm00001eb033080	0.26	0.85	0.001	1.45	0.001	0.295	6.375	3.14	1.21	4.375	7.73	5.195	2.47947	0.043772	0.0894676	-9.73132	0.128109	0.398009	8.20457	1	1	-0.543142	0.441763	0.806804	1.2997	0.0148942	0.112444	2.10212	0.0030573	0.0421173	1.59323	0.0187151	0.0626831	12.9163	9.36506e-12	1.58963e-10	4.13834	6.46403e-05	0.000553068
Zm00001eb033120	7.105	3.24	1.625	3.085	5.13	3.415	5.2	10.845	4.505	5.61	4.865	3.295	-1.20356	0.00687971	0.0184537	0.662965	0.170884	0.477504	1.07145	0.115692	0.371353	0.109489	0.706981	0.962634	-1.15652	0.00785422	0.0696147	-0.451249	0.51578	0.949487	0.86273	0.0740324	0.187262	-0.076519	1	1	-0.0516071	0.862253	0.980915
Zm00001eb033130	47.83	42.73	42.51	99.455	57.64	57.925	89.335	53.77	103.105	168.575	92.175	140.95	1.05613	3.13054e-06	1.82487e-05	0.431821	0.0314314	0.150754	0.446384	0.0144211	0.0907287	0.916093	2.42054e-06	5.84008e-05	0.777574	0.00256	0.0288717	0.451069	0.0398824	0.268929	0.761275	8.57858e-05	0.000596642	0.677305	0.000248736	0.00129593	1.28293	6.59349e-05	0.000563239
Zm00001eb033140	13.89	4.19	4.865	83.775	44.98	21.08	8.765	10.58	6.41	53.4	32.96	17	2.59247	7.06184e-26	4.72927e-24	3.42426	8.30399e-18	1.16801e-15	2.11536	4.75358e-08	2.52708e-06	2.60701	1.86502e-17	2.76928e-15	1.63938	1.31357e-05	0.000339809	1.40714	8.67777e-05	0.00234363	-0.64968	0.025329	0.0801709	-0.448567	0.253509	0.436447	-0.31034	0.169538	0.358527
Zm00001eb033200	0.001	0.001	0.001	2.58	6.45	0.001	0.001	0.001	0.001	9.375	24.28	4.155	11.3332	0.000132072	0.00055475	12.6551	3.7794e-09	1.41454e-07	0	1	1	13.1946	9.06685e-12	6.38488e-10	14.5675	5.17845e-16	1.02298e-13	12.0206	1.72178e-05	0.000600633	1.86145	8.53318e-05	0.000593793	1.9124	4.04483e-07	3.71284e-06	12.0206	7.33597e-05	0.000617548
Zm00001eb033260	10.32	8.575	9.065	7.18	7.77	7.82	3.16	3.785	3.265	2.335	2.46	3.1	-0.523387	0.113014	0.196865	-0.142222	1	1	-0.213138	1	1	-0.436502	0.839685	1	-0.621635	0.307894	0.739491	-0.0748148	1	1	-1.62056	0.00327161	0.0144314	-1.65926	0.00144948	0.00616944	-1.3349	0.00785707	0.0332284
Zm00001eb033280	13.1	30.055	32.04	31.075	28.03	29.19	43.855	50.98	49.61	45.23	46.595	49.58	1.24619	1.43014e-06	8.84881e-06	-0.100633	1	1	-0.1344	0.853538	1	0.0445387	0.449121	0.812921	-0.129756	0.560045	0.939237	-0.000872686	1	1	0.541526	0.00855103	0.0326993	0.733203	0.000930274	0.00419344	0.764284	0.0307413	0.0999355
Zm00001eb033330	6.475	11.5	10.665	8.11	9.025	6.91	0.945	1.04	0.94	0.655	0.565	1.09	0.324822	0.454439	0.588968	-0.349635	0.475095	0.815687	-0.626126	0.334922	0.672898	-0.528819	1	1	-0.880261	0.68757	1	0.213595	1	1	-3.63014	1.63112e-07	1.95479e-06	-3.9976	1.23293e-09	1.63243e-08	-2.66436	0.000160139	0.00122277
Zm00001eb033340	0.705	0.82	0.415	0.255	0.255	1.12	3.735	4.01	4.55	3.555	3.275	5.03	-1.46713	0.694462	0.802127	-1.68513	0.381552	0.736981	1.43232	0.219185	0.536629	-0.0712587	1	1	-0.292107	0.711374	1	0.144692	0.877208	1	3.80128	0.000379312	0.00221485	3.68293	0.000166336	0.000905735	2.16706	0.014012	0.053312
Zm00001eb033350	8.94	36.535	41.89	35.07	36.93	40.43	28.31	34.39	34.785	31.875	44.165	39.16	1.97189	1.17353e-13	2.14588e-12	0.0155141	0.707255	0.955236	-0.0511797	0.573371	0.86532	0.171114	0.258109	0.618096	0.360914	0.206978	0.618232	0.170915	0.506802	0.944807	-0.137812	0.888923	0.982788	0.25811	0.205824	0.377525	-0.0460454	0.474361	0.709436
Zm00001eb033360	0.001	0.001	0.001	0.001	0.001	0.001	13.865	17.94	15.21	13.27	25.07	18.195	0	1	1	0	1	1	0	1	1	-0.0632792	0.904794	1	0.482782	0.130831	0.480285	0.258522	0.515708	0.949487	13.6959	1.17383e-15	3.65954e-14	14.6137	4.1207e-31	3.1091e-29	14.1513	3.22105e-13	1.09921e-11
Zm00001eb033390	6.53	44.135	25.62	28.43	29.22	23.475	25.415	32.73	26.675	21.985	44.305	35.725	2.12226	4.25506e-13	7.28227e-12	-0.594967	0.059368	0.237781	-0.126145	0.870269	1	-0.209161	0.832018	1	0.436856	0.0905546	0.386667	0.421446	0.087016	0.436224	-0.370895	0.303543	0.524517	0.600513	0.00523213	0.018882	0.605809	0.130959	0.298714
Zm00001eb033400	9.98	10.245	14.525	10.1	9.82	11.545	4.025	4.53	3.825	2.335	3.235	2.605	0.0172436	1	1	-0.0611251	1	1	-0.33127	0.733631	0.960198	-0.785566	0.345447	0.717714	-0.485745	0.362138	0.800387	-0.554176	0.446246	0.917086	-2.11286	1.67186e-05	0.000137138	-1.60196	0.000332182	0.00166557	-2.14791	1.44495e-05	0.000145029
Zm00001eb033440	93.37	122.195	133.455	316.465	313.99	383.185	192.055	104.315	175.945	398.75	245.805	455.09	1.76101	3.53313e-13	6.08652e-12	1.36153	2.55107e-10	1.18335e-08	1.52169	1.87573e-09	1.51905e-07	1.05396	9.71253e-07	2.58851e-05	1.23657	0.000181966	0.00326112	1.37103	3.32963e-07	1.95514e-05	0.333439	0.0315457	0.095899	-0.353204	0.109283	0.234284	0.248111	0.754539	0.917134
Zm00001eb033460	44.46	30.45	38.93	66.45	72.175	89.635	51.91	46.155	45.275	79.055	53.9	59.38	0.579761	0.0103646	0.0262906	1.24506	3.83094e-07	9.37559e-06	1.20318	1.00548e-06	3.56109e-05	0.606844	0.000832855	0.00963139	0.223798	0.402946	0.836096	0.391262	0.0839654	0.427721	0.250588	0.114018	0.260049	-0.421214	0.0954151	0.210582	-0.594085	0.006746	0.0293599
Zm00001eb033470	6.38	3.5	5.22	9.8	8.475	14.47	6.22	7.215	3.75	10.455	6.925	8.64	0.619225	0.120227	0.207414	1.27586	0.00900126	0.0574929	1.47094	0.000105545	0.00184269	0.749207	0.0352366	0.178312	-0.0591853	1	1	1.20414	0.0101925	0.105016	0.0933394	0.636157	0.824566	-0.291399	0.634036	0.803029	-0.743962	0.0324717	0.104262
Zm00001eb033480	162.175	68.09	52.6	55.915	64.175	63.75	55.335	60.305	45.19	51.49	52.43	38.725	-1.53624	4.62619e-13	7.87625e-12	-0.0854315	1	1	0.277363	0.088416	0.312588	-0.1039	0.891744	1	-0.201885	0.355971	0.794726	-0.222738	0.339087	0.832051	-0.118943	0.943056	1	-0.291619	0.277614	0.465325	-0.71916	0.0020951	0.0111268
Zm00001eb033580	43.755	24.39	32.235	101.56	53.635	65.275	25.6	15.625	22.1	59.93	59.725	51.265	1.21481	1.88641e-05	9.47728e-05	1.13688	2.32679e-06	4.81594e-05	1.0179	4.08481e-06	0.000118382	1.22713	6.61717e-08	2.29569e-06	1.93448	1.08999e-10	9.02301e-09	1.21393	6.24069e-06	0.000256689	-0.760982	0.0048777	0.0202693	0.15516	0.369036	0.565773	-0.348556	0.0861553	0.218917
Zm00001eb033600	49.76	21.755	24.775	17.935	18.7	15.705	28.825	26.885	35.665	19.8	23.595	27.995	-1.47221	3.50274e-11	4.57453e-10	-0.218309	0.689081	0.946261	-0.657661	0.125666	0.386375	-0.54182	0.138205	0.433346	-0.18832	0.436872	0.86784	-0.34934	0.150446	0.582701	0.142723	0.384382	0.61038	0.335443	0.112777	0.240027	0.833945	0.0369396	0.115406
Zm00001eb033610	6.75	6.035	3.645	6.25	19.755	6.165	11.87	11.4	15	13.73	29.625	15.725	-0.111031	0.774796	0.866825	1.71079	7.01038e-06	0.00012925	0.758182	0.11391	0.368328	0.210012	0.332181	0.704476	1.37778	4.74781e-05	0.0010317	0.0680975	0.875346	1	1.1354	0.00152816	0.00745004	0.584597	0.0377217	0.100415	1.35089	0.00646582	0.0282891
Zm00001eb033620	18.57	5.875	6.255	5.315	4.78	5.06	10.21	9.5	13.915	7.775	12.86	13.035	-1.80483	1.5957e-08	1.39557e-07	-0.297578	0.797878	0.995422	-0.305872	0.889463	1	-0.393068	0.545853	0.877462	0.436891	0.269221	0.69421	-0.0942503	0.796989	1	0.548773	0.152112	0.321623	1.42781	9.44468e-05	0.0005402	1.36518	0.0109251	0.0436579
Zm00001eb033630	3.565	4.115	7.43	6.925	4.225	2.915	4.48	11.59	10.54	6.605	8.535	6.22	0.957912	0.0576149	0.112661	0.0380589	0.878715	1	-1.34987	0.0238359	0.130676	0.56006	0.156501	0.466636	-0.441418	0.255736	0.678114	-0.760888	0.0777785	0.407728	-0.0682555	1	1	1.01444	0.0120491	0.0386649	1.09342	0.173439	0.364516
Zm00001eb033650	13.695	30.5	16.095	15.66	23.95	6.44	29.76	31.89	39.58	24.14	25.225	26.47	0.193435	0.644181	0.760225	-0.348784	0.363689	0.720188	-1.32148	0.00524662	0.042827	-0.301949	0.601699	0.911697	-0.33825	0.153268	0.52346	-0.580413	0.222059	0.701683	0.624341	0.0114369	0.041634	0.0748286	0.638242	0.805698	2.03923	0.00207686	0.0110487
Zm00001eb033700	8.8	16.54	20.37	18.84	14.29	16.61	16.33	17.85	16.72	16.46	17.02	17.305	1.09822	0.00137348	0.00449278	-0.210953	0.729577	0.967979	-0.294394	0.803577	0.990947	0.0114395	0.690427	0.954487	-0.068693	0.770749	1	0.0496141	0.943241	1	-0.194835	0.760054	0.91106	0.252225	0.321379	0.515364	0.0591369	0.862463	0.980961
Zm00001eb033760	1.39	5.61	0.001	0.705	0.001	0.001	2.2	1.375	1.74	0.001	0.475	0.001	-0.97939	0.288655	0.415051	-12.4538	1.37765e-06	2.99104e-05	0	1	1	-11.1033	0.003917	0.0344561	-1.53343	0.453248	0.875314	-10.7649	0.020165	0.169813	-9.46148	0.256685	0.468478	8.89178	0.501253	0.693715	0	1	1
Zm00001eb033790	1.5	2.115	0.001	25.33	19.04	2.815	3.125	5.785	1.18	55.24	49.12	6.705	4.07781	1.6018e-23	8.71999e-22	3.1703	1.16148e-13	8.85908e-12	11.4589	0.000491618	0.00664937	4.14379	6.10036e-36	5.11348e-33	3.08592	1.29259e-19	4.26652e-17	2.50645	0.00017717	0.00424456	1.12487	3.05075e-07	3.51311e-06	1.36728	3.29326e-09	4.12196e-08	1.2521	0.0602666	0.168223
Zm00001eb033800	0.265	7.91	4.255	5.88	6.005	4.875	3.52	3.06	2.3	2.63	2.795	3.555	4.47175	1.3705e-08	1.20749e-07	-0.397513	0.548417	0.866301	0.196243	0.41217	0.746619	-0.420513	0.720836	0.970338	-0.130683	1	1	0.628216	0.503292	0.944807	-1.16075	0.0733464	0.186143	-1.10332	0.0885598	0.198367	-0.455553	0.435837	0.673568
Zm00001eb033870	49.525	83.735	88.955	47.02	45.975	60.585	91.685	92.495	141.035	79.755	41.205	35.16	-0.0748824	0.655975	0.770606	-0.864981	0.00128488	0.0118865	-0.554115	0.191549	0.498649	-0.201111	0.805173	1	-1.16656	3.12475e-06	9.76989e-05	-2.00405	4.73094e-18	1.86041e-15	0.7623	0.000829039	0.0044184	-0.15803	0.668899	0.829427	-0.785026	0.000998218	0.00596555
Zm00001eb033880	25.51	37.135	37.99	21.88	14.565	21.825	0.5	0.001	0.555	0.46	0.001	0.001	-0.22145	0.410023	0.544779	-1.35027	1.35718e-05	0.000233904	-0.799638	0.0400707	0.18648	-0.120294	1	1	0	1	1	-9.11634	0.505639	0.944807	-5.57184	8.29303e-16	2.61901e-14	-13.8302	6.59632e-19	2.20577e-17	-14.4137	3.0294e-18	1.82024e-16
Zm00001eb033960	13.2	11.895	11.115	13.92	13.6	6.52	4.32	3.335	4.44	3.585	4.25	4.4	0.0766213	0.950062	1	0.193251	0.438084	0.788308	-0.769564	0.199475	0.510228	-0.269058	1	1	0.349776	0.729479	1	-0.0130562	1	1	-1.95711	3.78269e-06	3.51942e-05	-1.67807	1.8732e-05	0.000125246	-0.567368	0.249429	0.469475
Zm00001eb034000	27.15	29.26	29.24	28.55	26.775	23.425	53.01	42.655	57.515	44.49	45.46	55.275	0.0725385	0.910192	0.968994	-0.128043	0.890451	1	-0.319894	0.674952	0.929987	-0.252783	0.630006	0.924189	0.0918828	0.794589	1	-0.0573111	0.815358	1	0.63999	0.00184673	0.00880381	0.763711	0.000114468	0.000644256	1.23858	0.000136221	0.00106067
Zm00001eb034050	0.6	1.36	0.895	1.15	8.23	1.435	0.001	0.91	0.001	0.001	13.14	2.2	0.938599	0.563375	0.689354	2.59729	9.83965e-06	0.000175837	0.681091	0.508016	0.81758	0	1	1	3.85195	3.20706e-09	1.94482e-07	11.1033	0.0039165	0.0508753	-10.1674	0.0362815	0.107036	0.675001	0.0426748	0.111007	0.616453	0.626819	0.829299
Zm00001eb034060	43.505	11.475	12.445	11.715	10.125	12.415	7.085	8.09	9.59	7.62	8.585	13.525	-1.89282	4.31888e-14	8.32156e-13	-0.180572	0.862402	1	-0.00348197	0.664731	0.921647	0.105023	0.584916	0.901446	0.0856784	1	1	0.496026	0.201178	0.671129	-0.620494	0.130747	0.287967	-0.238032	0.642499	0.809127	0.123544	1	1
Zm00001eb034090	56.915	11.365	12.865	11.955	10.515	11.385	9.205	10.365	11.11	9.79	10.255	9.89	-2.25119	2.0028e-16	5.21233e-15	-0.112149	1	1	-0.176317	1	1	0.0888911	0.55857	0.88519	-0.0153926	1	1	-0.167816	0.694944	1	-0.288233	0.637681	0.825592	-0.0361214	1	1	-0.203092	0.400942	0.639216
Zm00001eb034100	62.335	19.28	30.92	21.92	14.38	16.74	49.4	48.685	47.01	46.775	25.295	33.19	-1.50779	2.40461e-12	3.73236e-11	-0.423041	0.284287	0.635413	-0.885241	0.0304328	0.15669	-0.0787734	0.859328	1	-0.944625	0.000242012	0.00416343	-0.502219	0.0304634	0.226158	1.09349	1.08767e-06	1.12289e-05	0.814789	0.000494028	0.00238369	0.987449	0.0132689	0.051054
Zm00001eb034130	117.88	590.98	87.06	187.05	831.925	139.605	54.1	270.77	86.855	133.735	470.73	158.31	0.666105	0.00219908	0.0068065	0.493344	0.00496001	0.0362266	0.681269	0.00690968	0.052722	1.30568	2.58522e-07	7.93117e-06	0.797832	0.000399092	0.00638057	0.866072	3.71241e-05	0.00115876	-0.484047	0.147572	0.314259	-0.821554	2.43512e-05	0.000159046	0.181402	0.919382	1
Zm00001eb034220	140.17	162.8	31.84	21.335	24.77	13.585	1.34	0.98	3.24	1.12	0.001	1.26	-2.71588	1.12994e-24	6.81737e-23	-2.71643	1.06465e-15	1.04326e-13	-1.22883	0.000482135	0.00656896	-0.258734	1	1	-9.93664	0.130315	0.479385	-1.36257	0.183747	0.643324	-4.25165	8.60096e-18	3.21323e-16	-14.5963	5.15148e-28	3.19404e-26	-3.43052	8.20732e-09	1.49325e-07
Zm00001eb034240	17.685	12.15	8.84	8.3	26.725	60.565	0.845	0.001	0.93	1.845	3.685	2.18	-1.09134	0.0180657	0.0422289	1.13723	0.00249921	0.0207504	2.77637	5.23924e-18	3.40498e-15	1.1266	0.318642	0.68995	11.8474	0.000119147	0.00229022	1.22903	0.304412	0.796341	-2.16949	0.00166619	0.00804349	-2.85845	4.56419e-14	1.00951e-12	-4.79608	6.76619e-27	8.65878e-25
Zm00001eb034260	1.555	2.06	5.705	1.01	0.8	1.055	0.33	3.08	1.71	0.79	0.001	0.935	-0.622559	0.501893	0.634729	-1.36457	0.27685	0.62688	-2.43498	0.00252594	0.0244105	1.25939	0.375095	0.749054	-11.5887	0.00304776	0.0332247	-0.870958	0.551146	0.967182	-0.354431	1	1	-9.64386	0.127568	0.263102	-0.174205	1	1
Zm00001eb034290	0.001	0.001	0.001	0.001	0.001	0.001	2.84	2.31	4.335	1.785	3.595	5.755	0	1	1	0	1	1	0	1	1	-0.669967	0.503775	0.84991	0.638099	0.544815	0.930663	0.408784	0.498362	0.944807	10.8017	0.00459977	0.0193327	11.8118	1.14204e-05	7.99102e-05	12.4906	9.47946e-06	9.88731e-05
Zm00001eb034310	1.115	1.075	1.635	0.5	1.47	1.44	5.865	8.085	9.19	2.945	5.115	8.575	-1.15704	0.354287	0.486598	0.451479	0.776398	0.98784	-0.183222	1	1	-0.993863	0.123255	0.406836	-0.660514	0.14278	0.504146	-0.0999282	0.835055	1	2.55827	0.00363239	0.0158168	1.79892	0.00170569	0.00713634	2.57407	0.000197945	0.00147319
Zm00001eb034320	0.63	2.19	4.01	0.95	0.285	0.795	0.745	5.255	3.085	1.28	0.485	0.855	0.592576	0.767624	0.860743	-2.9419	0.023806	0.122288	-2.33458	0.00887167	0.0631297	0.780831	0.516325	0.85664	-3.43763	0.000434006	0.00682989	-1.85127	0.044254	0.286721	0.430144	0.781378	0.923837	0.767023	1	1	0.10497	1	1
Zm00001eb034400	0.001	0.001	0.001	0.001	0.001	0.001	3.675	4.68	3.175	1.77	3.275	3.645	0	1	1	0	1	1	0	1	1	-1.05399	0.162342	0.477849	-0.515014	0.475848	0.892891	0.199162	0.854842	1	10.7895	0.00475404	0.0198294	11.6773	2.29203e-05	0.000150545	11.8317	0.000240079	0.00174174
Zm00001eb034410	4.775	4.785	5.81	1.975	4.605	5.17	13.65	19.58	22.025	8.64	13.44	21.72	-1.27365	0.0221735	0.0503	-0.0553178	1	1	-0.168374	1	1	-0.659798	0.164689	0.482244	-0.542848	0.0599767	0.299452	-0.0201179	1	1	2.12918	1.69282e-05	0.000138687	1.54526	1.74269e-05	0.000117117	2.07079	4.86472e-06	5.37221e-05
Zm00001eb034450	0.33	1.225	1.95	0.001	0.36	0.775	0.565	6.91	2.64	1.05	0.64	0.29	-8.36632	0.505369	0.636194	-1.76671	0.459187	0.805221	-1.33121	0.344004	0.681974	0.894067	0.458327	0.81707	-3.43254	0.00143248	0.0180538	-3.18641	0.00660509	0.0760215	10.0362	0.0684494	0.17658	0.830075	1	1	-1.41814	0.638558	0.837178
Zm00001eb034470	0.001	0.001	0.001	0.001	0.001	0.001	1.9	2.81	2.68	0.98	2.165	0.865	0	1	1	0	1	1	0	1	1	-0.955146	0.709049	0.964115	-0.376203	0.647844	0.987013	-1.63146	0.0668869	0.37205	9.93664	0.0848689	0.207833	11.0802	0.00102465	0.00456843	9.75656	0.285111	0.511576
Zm00001eb034480	0.001	0.001	0.001	0.001	0.001	0.001	1.865	1.635	3.945	1.48	2.725	3.555	0	1	1	0	1	1	0	1	1	-0.333578	1	1	0.736966	0.480983	0.894395	-0.150176	0.862597	1	10.5314	0.0092902	0.0350697	11.412	0.000147428	0.000812021	11.7956	0.000362672	0.00248484
Zm00001eb034540	3.3	2.635	4.33	1.36	3.48	4.28	9.45	13.495	15.58	6.07	8.72	15.445	-1.27886	0.0571465	0.111929	0.401284	0.588005	0.890419	-0.0167562	0.866203	1	-0.638618	0.216248	0.56539	-0.630025	0.0776105	0.350089	-0.0125554	1	1	2.15809	0.000113141	0.000764632	1.32524	0.00127451	0.00551589	1.85146	0.000273217	0.00193778
Zm00001eb034570	1.365	2.32	2.465	0.19	0.235	1.21	0.65	4.155	2.215	0.89	0.25	0.485	-2.84483	0.0326072	0.0697622	-3.30339	0.0158123	0.0902883	-1.02658	0.424291	0.757156	0.453366	1	1	-4.05485	0.00229654	0.0264508	-2.19125	0.0680845	0.375891	2.22781	0.387809	0.613127	0.0892673	1	1	-1.31895	0.484352	0.718204
Zm00001eb034610	0.001	0.001	0.001	0.001	0.001	0.001	1.875	1.755	3.565	0.93	2.105	3.11	0	1	1	0	1	1	0	1	1	-1.01159	0.387917	0.757953	0.262349	1	1	-0.196987	1	1	9.86109	0.0677003	0.175103	11.0396	0.00103868	0.00461912	11.6027	0.00124981	0.0072415
Zm00001eb034650	22.925	27.635	30.835	57.13	39.73	34.375	39.61	35.155	37.975	36.64	64.205	58.34	1.31733	3.2737e-09	3.17841e-08	0.523732	0.019089	0.103913	0.156791	0.217228	0.535877	-0.112445	0.915105	1	0.868956	0.000518274	0.00791712	0.619435	0.00685092	0.0782264	-0.640829	0.0181622	0.0611633	0.692457	0.000276225	0.00141819	0.763126	0.0347676	0.109989
Zm00001eb034720	1.51	6.375	8.785	11.945	12.065	7.78	7.29	9.185	6.43	10.745	8.1	6.145	2.98379	2.49808e-11	3.32548e-10	0.920331	0.0282518	0.139221	-0.175272	1	1	0.559675	0.0632337	0.267132	-0.181358	0.6773	1	-0.0654057	1	1	-0.152741	0.937406	1	-0.574834	0.252356	0.434908	-0.340357	0.429417	0.667593
Zm00001eb034760	15.085	41.295	37.835	21.58	25.4	36.79	39.915	57.625	34.93	28.505	25.18	26.545	0.51658	0.0873701	0.159884	-0.701139	0.0113663	0.0694939	-0.0404078	0.573536	0.86532	-0.485716	0.139431	0.435417	-1.19442	7.89118e-07	2.86988e-05	-0.396027	0.105995	0.485955	0.40152	0.0488304	0.135144	-0.0125502	0.883046	0.971869	-0.470874	0.0471512	0.138667
Zm00001eb034780	10.52	45.575	28.65	33.93	46.06	25.105	19.01	33.645	12.62	18.38	25.09	16.175	1.68943	3.11327e-10	3.55211e-09	0.0152718	0.703639	0.953668	-0.19056	1	1	-0.0486218	0.823215	1	-0.42328	0.0801763	0.357197	0.358054	0.369266	0.857324	-0.884425	0.00531891	0.0217867	-0.876402	0.0005905	0.00278411	-0.634209	0.0290141	0.0953572
Zm00001eb034800	10.295	15.03	8.725	6.39	7.76	1.025	15.35	18.235	15.05	8.685	11.24	10.03	-0.688056	0.0494026	0.0991271	-0.953716	0.010843	0.0668412	-3.08953	1.63789e-06	5.42693e-05	-0.821641	0.104605	0.366711	-0.698068	0.023471	0.15653	-0.585442	0.121817	0.525937	0.44271	0.280716	0.497861	0.534513	0.077223	0.178191	3.29063	2.77395e-05	0.000261093
Zm00001eb034820	7.96	4.6	4.405	3.88	5.805	3.54	4.71	3.885	5.59	2.715	3.65	4.71	-1.03671	0.00955044	0.0244839	0.335662	0.444295	0.79328	-0.315393	1	1	-0.794775	0.306439	0.674644	-0.0900181	1	1	-0.247121	0.770196	1	-0.515104	0.514214	0.729741	-0.6694	0.234959	0.414389	0.411978	0.758871	0.919859
Zm00001eb034830	212.335	197.49	190.835	150.415	147.595	109.53	82.745	72.625	82.53	60.935	70.545	85.27	-0.497394	0.00722351	0.0192517	-0.420136	0.12762	0.397523	-0.801	0.0156884	0.0961616	-0.441401	0.183016	0.514517	-0.0419224	0.794069	1	0.0471196	0.852827	1	-1.30361	4.22833e-08	5.55519e-07	-1.06503	3.3802e-07	3.15246e-06	-0.361216	0.0491472	0.143145
Zm00001eb034840	12.15	13.645	8.21	9.425	10.62	2.55	10.57	8.19	11.2	6.76	7.2	5.795	-0.366392	0.221251	0.337811	-0.361589	0.473689	0.814654	-1.68688	0.00412684	0.0356772	-0.64488	0.28401	0.650735	-0.185867	0.735913	1	-0.950618	0.0532083	0.324529	-0.479469	0.40197	0.626847	-0.560715	0.190723	0.356889	1.18431	0.171604	0.361716
Zm00001eb034850	6.455	20.495	16.38	20.355	22.995	19.96	30.445	30.45	29.705	28.25	31.385	24.24	1.65689	7.00837e-08	5.53754e-07	0.166048	0.344395	0.701445	0.285176	0.158408	0.445813	-0.107954	0.964047	1	0.043633	1	1	-0.293316	0.277631	0.770286	0.472868	0.0253455	0.0802088	0.448755	0.0256186	0.0727671	0.280278	0.777083	0.932149
Zm00001eb034860	8.35	19.86	20.875	18.885	19.005	16.385	16.185	16.725	18.24	12.85	15.035	17.71	1.17739	0.000101908	0.000439252	-0.0634866	1	1	-0.349401	0.63644	0.903155	-0.332889	0.574769	0.896296	-0.153681	0.580596	0.952373	-0.0425415	0.943227	1	-0.555472	0.133682	0.29229	-0.338054	0.329966	0.525329	0.112189	0.94936	1
Zm00001eb034870	13.835	20.11	27.52	12.24	13.46	13.34	13.43	21.13	7.31	10.045	8.875	8.415	-0.176719	0.50717	0.637553	-0.579235	0.111501	0.364046	-1.04472	0.00696786	0.0530772	-0.418982	0.480185	0.835963	-1.25147	0.00454843	0.0454251	0.203092	0.633722	1	-0.285126	0.659656	0.841076	-0.600859	0.136943	0.278111	-0.664723	0.0493735	0.143662
Zm00001eb034920	4.07	5.965	6.11	3.23	3.65	3.46	1.605	0.745	0.79	0.56	2.205	2.43	-0.333495	0.584044	0.707887	-0.708626	0.267077	0.615392	-0.8204	0.26359	0.591723	-1.51907	0.352861	0.726375	1.56547	0.146177	0.509657	1.62103	0.112982	0.504617	-2.52804	0.00680206	0.0268578	-0.727118	0.276047	0.463355	-0.509816	0.359899	0.598512
Zm00001eb034940	52.62	86.385	105.735	35.015	49.45	77.24	31.435	51.735	34.835	23.91	25.485	22.145	-0.587638	0.00475733	0.0133817	-0.80481	0.00205351	0.0176433	-0.453033	0.367898	0.704936	-0.394758	0.332241	0.704476	-1.02149	0.000186691	0.00333434	-0.653557	0.0101345	0.104627	-0.550359	0.0758188	0.190842	-0.956322	4.25006e-05	0.000264554	-1.80237	4.54456e-10	1.01228e-08
[truncated: 13,793 more rows]
