# Supplementary material for: A Combination of a Genome-Wide Association Study and a Transcriptome Analysis Reveals circRNAs as New Regulators Involved in the Response to Salt Stress in Maize
Source: Int J Mol Sci. 2022 Aug 28;23(17):9755. doi: 10.3390/ijms23179755 (PMC9456493; doi:10.3390/ijms23179755)
Supplement: Supplementary file 1 [file ijms-23-09755-s001.zip › Table S5-Detailed information of 86 initial candidate genes.xlsx]

## Sheet: Sheet1
Table S5.Initial Candidate genes information.
Gene(B73v5)	Chrom	Start	End	Strand	Associated_SNP	SNP Position(v2)	SNP Position(v5)	Gene Type	Annotation
Zm00001eb013440	1	45131280	45134805	+	PZE-101062009	45633273	45450889	Protein Coding	GDSL/SGNH-like Acyl-Esterase family found in Pmr5 and Cas1p; PMR5 N terminal Domain
Zm00001eb013450	1	45160373	45162447	+	PZE-101062009	45633273	45450889	Protein Coding	Protein phosphatase 2C
Zm00001eb013460	1	45194488	45197152	+	PZE-101062009	45633273	45450889	Protein Coding	Mitochondrial carrier protein
Zm00001eb013470	1	45199168	45199908	+	PZE-101062009	45633273	45450889	Unknown	--
Zm00001eb013480	1	45219402	45220902	+	PZE-101062009	45633273	45450889	Protein Coding	Protein kinase domain
Zm00001eb013490	1	45224966	45227672	-	PZE-101062009	45633273	45450889	Protein Coding	RanBP1 domain
Zm00001eb013500	1	45304089	45305371	+	PZE-101062009	45633273	45450889	Unknown	--
Zm00001eb013510	1	45305512	45309174	+	PZE-101062009	45633273	45450889	Protein Coding	AAA domain; C2HE / C2H2 / C2HC zinc-binding finger; Macro domain; Scavenger mRNA decapping enzyme C-term binding
Zm00001eb013520	1	45311753	45314929	-	PZE-101062009	45633273	45450889	Protein Coding	Thiamine pyrophosphate enzyme, central domain; Thiamine pyrophosphate enzyme, C-terminal TPP binding domain; Thiamine pyrophosphate enzyme, N-terminal TPP binding domain
Zm00001eb013530	1	45386533	45390199	+	PZE-101062009	45633273	45450889	Unknown	--
Zm00001eb013540	1	45450560	45453882	+	PZE-101062009	45633273	45450889	Protein Coding	Tetratricopeptide repeat (TPR)-like superfamily protein; SNP host
Zm00001eb013550	1	45455315	45482323	+	PZE-101062009	45633273	45450889	Protein Coding	6-phosphofructo-2-kinase; Histidine phosphatase superfamily (branch 1); host gene of circ_000260
Zm00001eb013560	1	45507094	45521995	+	PZE-101062009	45633273	45450889	Protein Coding	KNOX1 domain; Late embryogenesis abundant protein
Zm00001eb013570	1	45524803	45526245	+	PZE-101062009	45633273	45450889	Unknown	--
Zm00001eb013580	1	45565717	45566292	+	PZE-101062009	45633273	45450889	Unknown	--
Zm00001eb013590	1	45566785	45569126	+	PZE-101062009	45633273	45450889	Protein Coding	Myb/SANT-like DNA-binding domain
Zm00001eb013600	1	45592821	45596957	+	PZE-101062009	45633273	45450889	Protein Coding	Tetratricopeptide repeat
Zm00001eb013610	1	45597357	45600587	-	PZE-101062009	45633273	45450889	Protein Coding	Protein tyrosine kinase
Zm00001eb013620	1	45603567	45610019	-	PZE-101062009	45633273	45450889	Protein Coding	ThiF family; Ubiquitin-activating enzyme active site; Ubiquitin-activating enzyme E1 FCCH domain; Ubiquitin-activating enzyme E1 four-helix bundle; Ubiquitin fold domain
Zm00001eb013630	1	45620132	45620970	+	PZE-101062009	45633273	45450889	Protein Coding	No apical meristem-associated C-terminal domain
Zm00001eb013640	1	45742285	45756236	+	PZE-101062009	45633273	45450889	Protein Coding	CHCH domain
Zm00001eb013650	1	45757210	45761073	-	PZE-101062009	45633273	45450889	Protein Coding	Protein tyrosine kinase
Zm00001eb013660	1	45767329	45775445	-	PZE-101062009	45633273	45450889	Protein Coding	Gamma interferon inducible lysosomal thiol reductase (GILT)
Zm00001eb115130	2	235601655	235614391	+	SYN6348	229479599	235820199	Unknown	--
Zm00001eb115140	2	235602192	235602976	+	SYN6348	229479599	235820199	Protein Coding	Patatin-like phospholipase
Zm00001eb115150	2	235618498	235620044	+	SYN6348	229479599	235820199	Protein Coding	Patatin-like phospholipase
Zm00001eb115160	2	235624458	235625498	+	SYN6348	229479599	235820199	Protein Coding	Patatin-like phospholipase
Zm00001eb115170	2	235627149	235627886	+	SYN6348	229479599	235820199	Unknown	--
Zm00001eb115180	2	235659997	235660734	-	SYN6348	229479599	235820199	Protein Coding	Protein of unknown function, DUF594
Zm00001eb115190	2	235661355	235662131	-	SYN6348	229479599	235820199	Unknown	--
Zm00001eb115200	2	235754171	235761165	+	SYN6348	229479599	235820199	Unknown	--
Zm00001eb115210	2	235768478	235769163	+	SYN6348	229479599	235820199	Unknown	--
Zm00001eb115220	2	235790865	235797391	-	SYN6348	229479599	235820199	Protein Coding	RNA recognition motif. (a.k.a. RRM, RBD, or RNP domain)
Zm00001eb115230	2	235818671	235820737	-	SYN6348	229479599	235820199	Protein Coding	Ribosome associated membrane protein RAMP4; SNP host
Zm00001eb115240	2	235924768	235930665	+	SYN6348	229479599	235820199	Protein Coding	No apical meristem-associated C-terminal domain
Zm00001eb115250	2	235941239	235948695	-	SYN6348	229479599	235820199	Protein Coding	Coiled-coil region of Oberon; PHD - plant homeodomain finger protein
Zm00001eb115260	2	235958782	235959204	+	SYN6348	229479599	235820199	Unknown	--
Zm00001eb115270	2	235961779	235967512	-	SYN6348	229479599	235820199	Protein Coding	Acyltransferase; Acyltransferase C-terminus
Zm00001eb115280	2	235963602	235964300	+	SYN6348	229479599	235820199	Unknown	--
Zm00001eb115290	2	236028015	236035901	+	SYN6348	229479599	235820199	Protein Coding	50S ribosome-binding GTPase; KH-domain-like of EngA bacterial GTPase enzymes, C-terminal
Zm00001eb115300	2	236035793	236040329	-	SYN6348	229479599	235820199	Protein Coding	Leucine Rich repeat
Zm00001eb115310	2	236064161	236064718	+	SYN6348	229479599	235820199	Unknown	--
Zm00001eb115320	2	236065030	236065617	+	SYN6348	229479599	235820199	Protein Coding	Late embryogenesis abundant protein
Zm00001eb115330	2	236066466	236073279	+	SYN6348	229479599	235820199	Protein Coding	NAD dependent epimerase/dehydratase family
Zm00001eb115340	2	236077472	236086817	-	SYN6348	229479599	235820199	Protein Coding	Folate-sensitive fragile site protein Fra10Ac1
Zm00001eb159790	3	224271535	224289826	+	PZA02824.5	218898682	224442800	Protein Coding	NMDA receptor-regulated protein 1; TPR repeat
Zm00001eb159800	3	224316042	224316765	+	PZA02824.5	218898682	224442800	Unknown	--
Zm00001eb159810	3	224321170	224327058	-	PZA02824.5	218898682	224442800	Unknown	--
Zm00001eb159820	3	224330266	224340418	-	PZA02824.5	218898682	224442800	Protein Coding	Peptidase dimerisation domain; Peptidase family M20/M25/M40
Zm00001eb159830	3	224345431	224353659	-	PZA02824.5	218898682	224442800	Protein Coding	Eukaryotic protein of unknown function (DUF866)
Zm00001eb159840	3	224353483	224354625	-	PZA02824.5	218898682	224442800	Protein Coding	Male enhanced antigen 1 (MEA1)
Zm00001eb159850	3	224379692	224381740	-	PZA02824.5	218898682	224442800	Protein Coding	Thi4 family
Zm00001eb159860	3	224379827	224381854	+	PZA02824.5	218898682	224442800	Unknown	--
Zm00001eb159870	3	224435141	224436735	-	PZA02824.5	218898682	224442800	Protein Coding	Protein of unknown function, DUF538
Zm00001eb159880	3	224437668	224440335	+	PZA02824.5	218898682	224442800	Unknown	--
Zm00001eb159890	3	224441716	224447713	-	PZA02824.5	218898682	224442800	Protein Coding	Protein EARLY FLOWERING 3, ELF3; SNP host
Zm00001eb159900	3	224447240	224447616	+	PZA02824.5	218898682	224442800	Unknown	--
Zm00001eb159910	3	224608396	224609673	+	PZA02824.5	218898682	224442800	Unknown	--
Zm00001eb159920	3	224641587	224645275	+	PZA02824.5	218898682	224442800	Unknown	--
Zm00001eb159930	3	224645104	224645349	+	PZA02824.5	218898682	224442800	Protein Coding	Sec61beta family
Zm00001eb159940	3	224662119	224671196	+	PZA02824.5	218898682	224442800	Unknown	--
Zm00001eb159950	3	224708920	224715014	+	PZA02824.5	218898682	224442800	Unknown	--
Zm00001eb159960	3	224723960	224726585	-	PZA02824.5	218898682	224442800	Protein Coding	Helix-loop-helix DNA-binding domain
Zm00001eb159970	3	224733578	224740462	-	PZA02824.5	218898682	224442800	Protein Coding	3'-5' exonuclease; KH domain
Zm00001eb198880	4	202202571	202203625	-	PZE-104119465	196370737	202484634	Protein Coding	Protein of unknown function, DUF538
Zm00001eb198890	4	202238858	202239403	+	PZE-104119465	196370737	202484634	Unknown	--
Zm00001eb198900	4	202310973	202313067	-	PZE-104119465	196370737	202484634	Protein Coding	Plant protein of unknown function
Zm00001eb198910	4	202382893	202385634	-	PZE-104119465	196370737	202484634	Protein Coding	Late embryogenesis abundant protein
Zm00001eb198920	4	202387007	202387560	-	PZE-104119465	196370737	202484634	Unknown	--
Zm00001eb198930	4	202387853	202394738	-	PZE-104119465	196370737	202484634	Unknown	host gene of circ_001362
Zm00001eb198940	4	202433302	202435217	+	PZE-104119465	196370737	202484634	Unknown	--
Zm00001eb198950	4	202483247	202489082	-	PZE-104119465	196370737	202484634	Protein Coding	Exo70 exocyst complex subunit; SNP host
Zm00001eb198960	4	202573964	202581639	+	PZE-104119465	196370737	202484634	Protein Coding	CCT motif; Response regulator receiver domain
Zm00001eb198970	4	202580538	202581639	+	PZE-104119465	196370737	202484634	Unknown	--
Zm00001eb198980	4	202582333	202583364	+	PZE-104119465	196370737	202484634	Unknown	--
Zm00001eb198990	4	202627113	202629380	-	PZE-104119465	196370737	202484634	Protein Coding	UBX domain; host gene of circ_001730
Zm00001eb199000	4	202723850	202725228	+	PZE-104119465	196370737	202484634	Protein Coding	Serine-threonine protein phosphatase N-terminal domain
Zm00001eb199010	4	202726928	202731139	+	PZE-104119465	196370737	202484634	Unknown	--
Zm00001eb199020	4	202732937	202733934	+	PZE-104119465	196370737	202484634	Unknown	--
Zm00001eb199030	4	202760734	202764239	+	PZE-104119465	196370737	202484634	Unknown	--
Zm00001eb392090	9	124283134	124283851	+	PZE-109073606	118923900	-	Unknown	--
Zm00001eb392100	9	124349528	124350210	+	PZE-109073606	118923900	-	Unknown	--
Zm00001eb392110	9	124357169	124357564	-	PZE-109073606	118923900	-	Unknown	--
Zm00001eb392120	9	124395757	124401212	-	PZE-109073606	118923900	-	Protein Coding	KH domain
Zm00001eb392130	9	124404714	124405700	-	PZE-109073606	118923900	-	Unknown	--
Zm00001eb392150	9	124627392	124628767	+	PZE-109073606	118923900	-	Protein Coding	RNA recognition motif. (a.k.a. RRM, RBD, or RNP domain)
