# Supplementary material for: A Combination of a Genome-Wide Association Study and a Transcriptome Analysis Reveals circRNAs as New Regulators Involved in the Response to Salt Stress in Maize
Source: Int J Mol Sci. 2022 Aug 28;23(17):9755. doi: 10.3390/ijms23179755 (PMC9456493; doi:10.3390/ijms23179755)
Supplement: Supplementary file 1 [file ijms-23-09755-s001.zip › Table S6-GO term enrichment analysis of 86 candidate genes in GWAS.xlsx]

## Sheet: Sheet1
Tabel S6. GO Enrichment analysis for 86 candidate genes in GWAS. The top 30 (a ranking by P-value) significantly enriched GO terms of each GO category.
GO category	GO ID	Description	Rich Factor	Pvalue	FDR	Genes
Biological Process	GO:0000012	single strand break repair	0.5	1.4826e-05	0.00515945	Zm00001eb013500;Zm00001eb013510
Biological Process	GO:0006842	tricarboxylic acid transport	1	0.00159714	0.111161	Zm00001eb013460
Biological Process	GO:0015741	fumarate transport	1	0.00159714	0.111161	Zm00001eb013460
Biological Process	GO:0015746	citrate transport	1	0.00159714	0.111161	Zm00001eb013460
Biological Process	GO:0042891	antibiotic transport	1	0.00159714	0.111161	Zm00001eb013460
Biological Process	GO:0006003	fructose 2,6-bisphosphate metabolic process	0.5	0.00319181	0.123417	Zm00001eb013550
Biological Process	GO:0015742	alpha-ketoglutarate transport	0.5	0.00319181	0.123417	Zm00001eb013460
Biological Process	GO:0015744	succinate transport	0.5	0.00319181	0.123417	Zm00001eb013460
Biological Process	GO:0071422	succinate transmembrane transport	0.5	0.00319181	0.123417	Zm00001eb013460
Biological Process	GO:0010225	response to UV-C	0.333333	0.00478401	0.156952	Zm00001eb115300
Biological Process	GO:0006974	cellular response to DNA damage stimulus	0.00698324	0.00526043	0.156952	Zm00001eb013500;Zm00001eb013510;Zm00001eb013620;Zm00001eb115300;Zm00001eb159950
Biological Process	GO:0033554	cellular response to stress	0.00580271	0.00541212	0.156952	Zm00001eb013500;Zm00001eb013510;Zm00001eb013620;Zm00001eb115230;Zm00001eb115300;Zm00001eb159950
Biological Process	GO:0050896	response to stimulus	0.00329489	0.00826542	0.2107	Zm00001eb013460;Zm00001eb013500;Zm00001eb013510;Zm00001eb013620;Zm00001eb013630;Zm00001eb013650;Zm00001eb115230;Zm00001eb115300;Zm00001eb159790;Zm00001eb159890;Zm00001eb159950;Zm00001eb198960
Biological Process	GO:0009793	embryo development ending in seed dormancy	0.0229885	0.00850859	0.2107	Zm00001eb115290;Zm00001eb159790
Biological Process	GO:0009790	embryo development	0.0222222	0.00908189	0.2107	Zm00001eb115290;Zm00001eb159790
Biological Process	GO:0051716	cellular response to stimulus	0.0036305	0.0135315	0.228333	Zm00001eb013500;Zm00001eb013510;Zm00001eb013620;Zm00001eb013630;Zm00001eb013650;Zm00001eb115230;Zm00001eb115300;Zm00001eb159950;Zm00001eb198960
Biological Process	GO:0006120	mitochondrial electron transport, NADH to ubiquinone	0.111111	0.0142855	0.228333	Zm00001eb013640
Biological Process	GO:0048608	reproductive structure development	0.00906344	0.0156128	0.228333	Zm00001eb115290;Zm00001eb159790;Zm00001eb159890
Biological Process	GO:0017196	N-terminal peptidyl-methionine acetylation	0.1	0.0158605	0.228333	Zm00001eb159790
Biological Process	GO:0061458	reproductive system development	0.00900901	0.0158642	0.228333	Zm00001eb115290;Zm00001eb159790;Zm00001eb159890
Biological Process	GO:0006000	fructose metabolic process	0.0909091	0.017433	0.228333	Zm00001eb013550
Biological Process	GO:0090305	nucleic acid phosphodiester bond hydrolysis	0.00847458	0.0186422	0.228333	Zm00001eb013500;Zm00001eb013510;Zm00001eb159970
Biological Process	GO:0006616	SRP-dependent cotranslational protein targeting to membrane, translocation	0.0833333	0.0190031	0.228333	Zm00001eb159930
Biological Process	GO:0016024	CDP-diacylglycerol biosynthetic process	0.0833333	0.0190031	0.228333	Zm00001eb115270
Biological Process	GO:0018206	peptidyl-methionine modification	0.0833333	0.0190031	0.228333	Zm00001eb159790
Biological Process	GO:0042793	plastid transcription	0.0833333	0.0190031	0.228333	Zm00001eb115290
Biological Process	GO:0046341	CDP-diacylglycerol metabolic process	0.0833333	0.0190031	0.228333	Zm00001eb115270
Biological Process	GO:0015740	C4-dicarboxylate transport	0.0769231	0.0205708	0.228333	Zm00001eb013460
Biological Process	GO:0015743	malate transport	0.0769231	0.0205708	0.228333	Zm00001eb013460
Biological Process	GO:0031204	posttranslational protein targeting to membrane, translocation	0.0769231	0.0205708	0.228333	Zm00001eb159930
Molecular Function	GO:0033699	DNA 5'-adenosine monophosphate hydrolase activity	1	3.04913e-06	0.000275946	Zm00001eb013500;Zm00001eb013510
Molecular Function	GO:1990165	single-strand break-containing DNA binding	1	3.04913e-06	0.000275946	Zm00001eb013500;Zm00001eb013510
Molecular Function	GO:0030628	pre-mRNA 3'-splice site binding	0.153846	0.000234914	0.0123876	Zm00001eb115220;Zm00001eb115240
Molecular Function	GO:0035312	5'-3' exodeoxyribonuclease activity	0.142857	0.000273759	0.0123876	Zm00001eb013500;Zm00001eb013510
Molecular Function	GO:0008187	poly-pyrimidine tract binding	0.105263	0.000511551	0.0185182	Zm00001eb115220;Zm00001eb115240
Molecular Function	GO:0036002	pre-mRNA binding	0.0952381	0.000626815	0.0189089	Zm00001eb115220;Zm00001eb115240
Molecular Function	GO:0030983	mismatched DNA binding	0.0833333	0.000821049	0.020169	Zm00001eb013500;Zm00001eb013510
Molecular Function	GO:0003725	double-stranded RNA binding	0.08	0.000891446	0.020169	Zm00001eb013500;Zm00001eb013510
Molecular Function	GO:0004529	exodeoxyribonuclease activity	0.0689655	0.00120103	0.0217387	Zm00001eb013500;Zm00001eb013510
Molecular Function	GO:0016895	exodeoxyribonuclease activity, producing 5'-phosphomonoesters	0.0689655	0.00120103	0.0217387	Zm00001eb013500;Zm00001eb013510
Molecular Function	GO:0008409	5'-3' exonuclease activity	0.0555556	0.00184913	0.0304265	Zm00001eb013500;Zm00001eb013510
Molecular Function	GO:0003727	single-stranded RNA binding	0.0425532	0.00313409	0.0426142	Zm00001eb115220;Zm00001eb115240
Molecular Function	GO:0003873	6-phosphofructo-2-kinase activity	0.5	0.00353156	0.0426142	Zm00001eb013550
Molecular Function	GO:0004331	fructose-2,6-bisphosphate 2-phosphatase activity	0.5	0.00353156	0.0426142	Zm00001eb013550
Molecular Function	GO:0015141	succinate transmembrane transporter activity	0.5	0.00353156	0.0426142	Zm00001eb013460
Molecular Function	GO:0004527	exonuclease activity	0.0169492	0.00376736	0.0426182	Zm00001eb013500;Zm00001eb013510;Zm00001eb159970
Molecular Function	GO:0015556	C4-dicarboxylate transmembrane transporter activity	0.333333	0.00529277	0.0563525	Zm00001eb013460
Molecular Function	GO:0004536	deoxyribonuclease activity	0.0285714	0.00682427	0.0607724	Zm00001eb013500;Zm00001eb013510
Molecular Function	GO:0004737	pyruvate decarboxylase activity	0.25	0.00705095	0.0607724	Zm00001eb013520
Molecular Function	GO:0016819	hydrolase activity, acting on acid anhydrides, in sulfonyl-containing anhydrides	0.25	0.00705095	0.0607724	Zm00001eb013510
Molecular Function	GO:0047627	adenylylsulfatase activity	0.25	0.00705095	0.0607724	Zm00001eb013510
Molecular Function	GO:0003841	1-acylglycerol-3-phosphate O-acyltransferase activity	0.2	0.00880608	0.070779	Zm00001eb115270
Molecular Function	GO:0003690	double-stranded DNA binding	0.00677507	0.00937531	0.070779	Zm00001eb013500;Zm00001eb013510;Zm00001eb013580;Zm00001eb013590;Zm00001eb159960
Molecular Function	GO:0016788	hydrolase activity, acting on ester bonds	0.00511322	0.00950362	0.070779	Zm00001eb013450;Zm00001eb013500;Zm00001eb013510;Zm00001eb013550;Zm00001eb115150;Zm00001eb115340;Zm00001eb159970
Molecular Function	GO:0003684	damaged DNA binding	0.0235294	0.00992095	0.070779	Zm00001eb013500;Zm00001eb013510
Molecular Function	GO:0004839	ubiquitin activating enzyme activity	0.166667	0.0105582	0.070779	Zm00001eb013620
Molecular Function	GO:0042171	lysophosphatidic acid acyltransferase activity	0.166667	0.0105582	0.070779	Zm00001eb115270
Molecular Function	GO:0010178	IAA-amino acid conjugate hydrolase activity	0.142857	0.0123073	0.0742539	Zm00001eb159820
Molecular Function	GO:0010179	IAA-Ala conjugate hydrolase activity	0.142857	0.0123073	0.0742539	Zm00001eb159820
Molecular Function	GO:0071617	lysophospholipid acyltransferase activity	0.142857	0.0123073	0.0742539	Zm00001eb115270
Cellular Component	GO:0000243	commitment complex	0.181818	0.000178096	0.0133418	Zm00001eb115220;Zm00001eb115240
Cellular Component	GO:0089701	U2AF	0.166667	0.000213468	0.0133418	Zm00001eb115220;Zm00001eb115240
Cellular Component	GO:0071004	U2-type prespliceosome	0.08	0.000955847	0.0298702	Zm00001eb115220;Zm00001eb115240
Cellular Component	GO:0071010	prespliceosome	0.08	0.000955847	0.0298702	Zm00001eb115220;Zm00001eb115240
Cellular Component	GO:0016607	nuclear speck	0.037037	0.00440951	0.105629	Zm00001eb115220;Zm00001eb115240
Cellular Component	GO:0005684	U2-type spliceosomal complex	0.0344828	0.0050702	0.105629	Zm00001eb115220;Zm00001eb115240
Cellular Component	GO:0031415	NatA complex	0.25	0.00731548	0.118718	Zm00001eb159790
Cellular Component	GO:0016604	nuclear body	0.0263158	0.00856278	0.118718	Zm00001eb115220;Zm00001eb115240
Cellular Component	GO:0031205	endoplasmic reticulum Sec complex	0.166667	0.0109537	0.118718	Zm00001eb159930
Cellular Component	GO:0005784	Sec61 translocon complex	0.142857	0.0127679	0.118718	Zm00001eb159930
Cellular Component	GO:0005911	cell-cell junction	0.011194	0.0129064	0.118718	Zm00001eb115320;Zm00001eb159790;Zm00001eb198910
Cellular Component	GO:0009506	plasmodesma	0.011194	0.0129064	0.118718	Zm00001eb115320;Zm00001eb159790;Zm00001eb198910
Cellular Component	GO:0055044	symplast	0.011194	0.0129064	0.118718	Zm00001eb115320;Zm00001eb159790;Zm00001eb198910
Cellular Component	GO:0030054	cell junction	0.0110701	0.0132964	0.118718	Zm00001eb115320;Zm00001eb159790;Zm00001eb198910
Cellular Component	GO:0071256	translocon complex	0.111111	0.0163866	0.136555	Zm00001eb159930
Cellular Component	GO:0031414	N-terminal protein acetyltransferase complex	0.0769231	0.0235854	0.17623	Zm00001eb159790
Cellular Component	GO:0005791	rough endoplasmic reticulum	0.0714286	0.0253771	0.17623	Zm00001eb159930
Cellular Component	GO:0030867	rough endoplasmic reticulum membrane	0.0714286	0.0253771	0.17623	Zm00001eb159930
Cellular Component	GO:0000922	spindle pole	0.047619	0.0378296	0.248879	Zm00001eb199010
Cellular Component	GO:0046658	anchored component of plasma membrane	0.010929	0.0442841	0.276776	Zm00001eb115320;Zm00001eb198910
Cellular Component	GO:0031225	anchored component of membrane	0.010582	0.0469237	0.279308	Zm00001eb115320;Zm00001eb198910
Cellular Component	GO:0005681	spliceosomal complex	0.00966184	0.0551777	0.291216	Zm00001eb115220;Zm00001eb115240
Cellular Component	GO:0031967	organelle envelope	0.00505051	0.0559135	0.291216	Zm00001eb013460;Zm00001eb013490;Zm00001eb013540;Zm00001eb013640
Cellular Component	GO:0031975	envelope	0.00505051	0.0559135	0.291216	Zm00001eb013460;Zm00001eb013490;Zm00001eb013540;Zm00001eb013640
Cellular Component	GO:0005815	microtubule organizing center	0.0285714	0.0622718	0.301028	Zm00001eb199010
Cellular Component	GO:0005747	mitochondrial respiratory chain complex I	0.0263158	0.0674303	0.301028	Zm00001eb013640
Cellular Component	GO:0030964	NADH dehydrogenase complex	0.0263158	0.0674303	0.301028	Zm00001eb013640
Cellular Component	GO:0045271	respiratory chain complex I	0.0263158	0.0674303	0.301028	Zm00001eb013640
Cellular Component	GO:0009579	thylakoid	0.00573614	0.0703238	0.30312	Zm00001eb013500;Zm00001eb013600;Zm00001eb159790
Cellular Component	GO:0031226	intrinsic component of plasma membrane	0.00704225	0.0953695	0.376523	Zm00001eb115320;Zm00001eb198910
