# Supplementary material for: A Combination of a Genome-Wide Association Study and a Transcriptome Analysis Reveals circRNAs as New Regulators Involved in the Response to Salt Stress in Maize
Source: Int J Mol Sci. 2022 Aug 28;23(17):9755. doi: 10.3390/ijms23179755 (PMC9456493; doi:10.3390/ijms23179755)
Supplement: Supplementary file 1 [file ijms-23-09755-s001.zip › Table S7-Primers for PCR and qRT-PCR used in this study.xlsx]

## Sheet: Sheet1
Table S7. Primers for PCR and qRT-PCR.
CircRNA ID	Divergent primers		Convergent primers		Real-time PCR primers
	Forward	Reverse	Forward	Reverse	Forward	Reverse
ZmUBQ	-	-	-	-	TGGTTGTGGCTTCGTTGGTT	GCTGCAGAAGAGTTTTGGGTACA
circ_000603	ATCTATTAATTCCCCCGCCT	AACCGCTACTCGGAGCGCCA	AGGCGGGGGAATTAATAGAT	GGCTCCTTGTAGTCCTTCTC	-	-
circ_000691	GGCCTCTTTAGACCTGAAGC	TCAGGAAACATCCACACCAC	CGCTTCAGGTCTAAAGAGGCC	GTGGTGTGGATGTTTCCTGA	-	-
circ_000803	CGTCTGCTGTGTGTGATTTG	ATTCCTCGCTGCGCAGAACT	ACATCCAAATCACACACAGC	GACGCTCGCGGTGAGTTCTG	CGTCTGCTGTGTGTGATTTG	ATTCCTCGCTGCGCAGAACT
circ_000808	GCAAGACCATAACCCTGGAG	TGGTCCGGTGGAATGCCCTC	CTCCAGGGTTATGGTCTTGC	ACATCCAGAAGGAGAGCACC	-	-
circ_000977	TGCAATCAGGAGTTCGGAAT	AGAACAGCGATTTGGGTAGA	ATTCCGAACTCCTGATTGCA	TCTACCCAAATCGCTGTTCT	-	-
circ_000997	CTATTCATAACCAAGGGACC	GCTCCCTTAATGCTTCGTTA	GGAAAGGTCCCTTGGTTATG	CAGGATCAAACTCGCTAACA	CTATTCATAACCAAGGGACC	GCTCCCTTAATGCTTCGTTA
circ_001362	CGGGGGAGTAAGCGACGCGG	CCAACTCCTCACTCTCCGCC	CCGCGTCGCTTACTCCCCCG	CTTGGCGTTGGGGTTGGCGG	CGGGGGAGTAAGCGACGCGG	CCAACTCCTCACTCTCCGCC
circ_001618	GTGACGACGAACGGCGGTGA	AGGAGCAGGCATTGGCAACA	TCACCGCCGTTCGTCGTCACC	TGTTGCCAATGCCTGCTCCT	GTGACGACGAACGGCGGTGA	AGGAGCAGGCATTGGCAACA
